# Supplementary material for: Androglobin, a chimeric mammalian globin, is required for male fertility
Source: eLife. 2022 Jun 14;11:e72374. doi: 10.7554/eLife.72374 (PMC9249397; doi:10.7554/eLife.72374)
Supplement: Figure 3—source data 1. — Genes with a significant >twofold induction or reduction are displayed. [file elife-72374-fig3-data1.xlsx]

## Sheet: upregulated
Ensembl ID	Gene Symbol		log2FoldChange	lfcSE	stat	pvalue	padj
ENSMUSG00000116207	Nnt	nicotinamide nucleotide transhydrogenase	26.3121	4.78479	-5.4991	3.81724e-08	5.98845e-06
ENSMUSG00000026937	Lcn5	Lipocalin 5	24.7505	4.78497	-5.17254	2.30931e-07	2.93614e-05
ENSMUSG00000042729	Wdr74	WD repeat domain 74	24.6141	4.78499	-5.14403	2.68909e-07	3.3749e-05
ENSMUSG00000017310	Spint4	Serine protease inhibitor, Kunitz type 4	23.5421	4.78529	-4.91968	8.66872e-07	8.92236e-05
ENSMUSG00000048600	Gm5763	Predicted pseudogene 5763	23.2958	4.7854	-4.8681	1.12676e-06	0.000112404
ENSMUSG00000091987	Gm10352	Predicted gene 10352	23.2444	4.78542	-4.85734	1.18974e-06	0.000118082
ENSMUSG00000095595	Fam177a	Family with sequence similarity 177, member A	13.8395	1.45016	-9.54345	1.38164e-21	3.35962e-18
ENSMUSG00000095304	Plac9a	Placenta specific 9a	10.5245	1.49264	-7.05097	1.7768e-12	9.34163e-10
ENSMUSG00000078234	Klhdc7a	Kelch domain containing 7A	9.82731	1.52208	-6.45651	1.07142e-10	3.36167e-08
ENSMUSG00000079120	AY761185	cDNA sequence AY761185	9.75046	2.76496	-3.52644	0.000421189	0.01487
ENSMUSG00000094511	Gm21693	Predicted gene 21693	9.44811	2.61282	-3.61605	0.000299131	0.0115
ENSMUSG00000097565	Gm26965	Predicted gene 26965	9.30431	1.55708	-5.97548	2.29408e-09	4.85074e-07
ENSMUSG00000100112	Gm29258	Predicted gene 29258	9.2916	1.5622	-5.94777	2.7182e-09	5.50804e-07
ENSMUSG00000025927	Tfap2b	Transcription factor AP-2 beta	9.26765	2.94774	-3.14398	0.00166664	0.0417799
ENSMUSG00000061527	Krt5	Keratin 5	9.26751	3.0647	-3.02395	0.00249495	0.0552783
ENSMUSG00000076309	Mir147	MicroRNA 147	8.73081	1.6518	-5.28562	1.25278e-07	1.73865e-05
ENSMUSG00000071165	Gm6040	Predicted gene 6040	8.69289	1.80138	-4.82568	1.39525e-06	0.000134365
ENSMUSG00000073573	Spink11	Serine peptidase inhibitor, Kazal type 11	7.23798	2.35001	-3.07998	0.00207014	0.048402
ENSMUSG00000094105	Gm8922	Predicted gene 8922	6.62122	1.81781	-3.64242	0.00027009	0.0106358
ENSMUSG00000068407	Rnase12	Ribonuclease, RNase A family, 12 (non-active)	5.42121	1.51474	-3.57897	0.000344945	0.0127087
ENSMUSG00000026405	C4bp	Complement component 4 binding protein	5.25339	1.74166	-3.01632	0.00255862	0.0564142
ENSMUSG00000067704	Wfdc13	WAP four-disulfide core domain 13	4.92893	1.64981	-2.98758	0.00281197	0.059814
ENSMUSG00000072575	Eddm3b	Epididymal protein 3B	4.36557	1.38014	-3.16314	0.00156079	0.0396372
ENSMUSG00000028386	Slc46a2	Solute carrier family 46, member 2	4.26718	1.17428	-3.63387	0.000279203	0.0109158
ENSMUSG00000050074	Spink8	Serine peptidase inhibitor, Kazal type 8	4.01957	1.41027	-2.85022	0.00436889	0.079876
ENSMUSG00000064702	Gm24950	Predicted gene, 24950	3.8866	1.30972	-2.96749	0.00300237	0.0623987
ENSMUSG00000059149	Mfsd4a	Major facilitator superfamily domain containing 4A	3.54693	0.447939	-7.91833	2.40713e-15	2.22981e-12
ENSMUSG00000105145	Gm47299	Predicted gene, 47299	3.17444	1.10394	-2.87555	0.00403322	0.0760221
ENSMUSG00000075572	Defb43	Defensin beta 43	3.09449	0.872061	-3.54847	0.00038747	0.0139582
ENSMUSG00000054169	Ceacam10	Carcinoembryonic antigen-related cell adhesion molecule 10	3.07289	1.05591	-2.91019	0.00361212	0.0710072
ENSMUSG00000040205	Cuzd1	CUB and zona pellucida like domains 1	3.06591	1.08462	-2.82672	0.00470281	0.0841617
ENSMUSG00000062444	Ap3b2	Adaptor-related protein complex 3, beta 2 subunit	2.9119	1.01959	-2.85594	0.0042909	0.0788661
ENSMUSG00000000682	Cd52	CD52 antigen	2.89711	0.98142	-2.95196	0.00315766	0.0645909
ENSMUSG00000031382	Asb11	Ankyrin repeat and SOCS box-containing 11	2.68774	0.791767	-3.39461	0.000687265	0.0216683
ENSMUSG00000049823	Zbtb12	Zinc finger and BTB domain containing 12	2.67972	0.447184	-5.99244	2.06721e-09	4.46817e-07
ENSMUSG00000015093	Clic3	Chloride intracellular channel 3	2.58956	0.897972	-2.88379	0.00392921	0.0747092
ENSMUSG00000079484	Phyhd1	Phytanoyl-CoA dioxygenase domain containing 1	2.46744	0.717209	-3.44034	0.000580986	0.0190203
ENSMUSG00000002565	Scin	Scinderin	2.2359	0.683631	-3.27063	0.00107308	0.029736
ENSMUSG00000031995	St14	Suppression of tumorigenicity 14 (colon carcinoma)	2.20778	0.754617	-2.92569	0.00343693	0.0685728
ENSMUSG00000014813	Stc1	Stanniocalcin 1	2.04733	0.657636	-3.11317	0.00185088	0.0448941
ENSMUSG00000023011	Faim2	Fas apoptotic inhibitory molecule 2	2.02696	0.738541	-2.74455	0.00605945	0.0982178
ENSMUSG00000094595	Fsbp	Fibrinogen silencer binding protein	1.97755	0.665261	-2.9726	0.00295292	0.0618333
ENSMUSG00000021852	Slc35f4	Solute carrier family 35, member F4	1.90455	0.666754	-2.85646	0.00428397	0.0788661
ENSMUSG00000052131	Akr1b7	Aldo-keto reductase family 1, member B7	1.90269	0.687498	-2.76756	0.00564783	0.0935541
ENSMUSG00000097278	Gm26650	Predicted gene, 26650	1.74846	0.293109	-5.96523	2.44297e-09	5.00243e-07
ENSMUSG00000109941	Exosc6	Exosome component 6	1.66633	0.479489	-3.47521	0.000510448	0.0172691
ENSMUSG00000032890	Rims3	Regulating synaptic membrane exocytosis 3	1.64822	0.245512	-6.71342	1.90112e-11	7.54746e-09
ENSMUSG00000000303	Cdh1	Cadherin 1	1.59595	0.560545	-2.84714	0.00441142	0.0805022
ENSMUSG00000032092	Mpzl2	Myelin protein zero-like 2	1.59362	0.300837	-5.29728	1.17543e-07	1.64501e-05
ENSMUSG00000089862	Umad1	UMAP1-MVP12 associated (UMA) domain containing 1	1.56416	0.194672	-8.03483	9.37111e-16	9.59454e-13
ENSMUSG00000027173	Depdc7	DEP domain containing 7	1.53521	0.503672	-3.04803	0.00230349	0.052409
ENSMUSG00000047250	Ptgs1	Prostaglandin-endoperoxide synthase 1	1.50417	0.526713	-2.85576	0.00429338	0.0788661
ENSMUSG00000037370	Enpp1	Ectonucleotide pyrophosphatase/phosphodiesterase 1	1.49444	0.51938	-2.87735	0.00401036	0.0756678
ENSMUSG00000037509	Arhgef4	Rho guanine nucleotide exchange factor (GEF) 4	1.42794	0.428971	-3.32875	0.000872358	0.0255572
ENSMUSG00000072966	Gprasp2	G protein-coupled receptor associated sorting protein 2	1.42337	0.397456	-3.58121	0.000342003	0.0126483
ENSMUSG00000029120	Ppp2r2c	Protein phosphatase 2, regulatory subunit B, gamma	1.41011	0.213459	-6.60601	3.9481e-11	1.42227e-08
ENSMUSG00000093674	Rpl41	Ribosomal protein L41	1.39018	0.108401	-12.8244	1.19712e-37	1.16438e-33
ENSMUSG00000044730	9930104L06Rik		1.361	0.228067	-5.96753	2.40867e-09	5.00243e-07
ENSMUSG00000097599	-	predicted gene, 26678	1.35256	0.473433	-2.85692	0.00427768	0.0788661
ENSMUSG00000097239	-	Predicted gene, 27029	1.26457	0.452684	-2.79349	0.00521425	0.0891877
ENSMUSG00000039062	Anpep	Alanyl (membrane) aminopeptidase	1.2373	0.425228	-2.90974	0.00361734	0.0710072
ENSMUSG00000026842	Abl1	C-abl oncogene 1, non-receptor tyrosine kinase	1.21029	0.106373	-11.3778	5.39722e-30	3.49974e-26
ENSMUSG00000064325	Hhip	Hedgehog-interacting protein	1.20091	0.409876	-2.92992	0.00339044	0.0680527
ENSMUSG00000033272	Slc35a4	Solute carrier family 35, member A4	1.17478	0.1757	-6.68628	2.2891e-11	8.73135e-09
ENSMUSG00000069743	Zfp820	Zinc finger protein 820	1.15374	0.202018	-5.71106	1.12273e-08	2.08005e-06
ENSMUSG00000050345	4930486L24Rik		1.12595	0.235191	-4.7874	1.68955e-06	0.000155238
ENSMUSG00000074405	Zfp865	Zinc finger protein 865	1.11997	0.183439	-6.10539	1.02547e-09	2.40343e-07
ENSMUSG00000061531	Tmem236	Transmembrane protein 236	1.08726	0.392725	-2.76851	0.00563126	0.0935481
ENSMUSG00000047146	Tet1	Tet methylcytosine dioxygenase 1	1.0805	0.356129	-3.03402	0.0024132	0.0541453
ENSMUSG00000020932	Gfap	Glial fibrillary acidic protein	1.0714	0.386719	-2.77048	0.00559729	0.0930633
ENSMUSG00000096954	-		1.02828	0.372036	-2.76393	0.00571101	0.0940697
ENSMUSG00000021255	Esrrb	Estrogen related receptor, beta	1.02782	0.369426	-2.7822	0.00539912	0.0912869
ENSMUSG00000029175	Slc35f6	Solute carrier family 35, member F6	1.02296	0.155527	-6.57741	4.78703e-11	1.6629e-08
ENSMUSG00000056153	Socs6	Suppressor of cytokine signaling 6	1.02206	0.267441	-3.82164	0.000132566	0.00590114

## Sheet: downregulated
Ensembl ID	Gene Symbol		log2FoldChange	lfcSE	stat	pvalue	padj
ENSMUSG00000101818	Gm28269	Predicted gene 28269	-1.00272	0.277603	3.61206	0.000303774	0.0116096
ENSMUSG00000075524	4930407I10Rik		-1.00445	0.124176	8.08896	6.01744e-16	6.50318e-13
ENSMUSG00000041165	Spem1	Spermatid maturation 1	-1.00623	0.160666	6.26289	3.77907e-10	9.80191e-08
ENSMUSG00000048994	H2al3	H2A histone family member L3	-1.00638	0.251191	4.00645	6.16387e-05	0.0032034
ENSMUSG00000040456	H2ap	Huntingtin interacting protein M	-1.00825	0.267837	3.76441	0.000166944	0.00712183
ENSMUSG00000049491	Slc36a3	Solute carrier family 36 (proton/amino acid symporter), member 3	-1.0101	0.195837	5.15788	2.49758e-07	3.1549e-05
ENSMUSG00000093445	Lrch4	Leucine-rich repeats and calponin homology (CH) domain containing 4	-1.01027	0.107668	9.38322	6.39909e-21	1.38313e-17
ENSMUSG00000091594	Gm17067	Predicted gene 17067	-1.01136	0.35085	2.88259	0.00394419	0.0747092
ENSMUSG00000029828	4921507P07Rik		-1.01221	0.129993	7.78663	6.88216e-15	5.82081e-12
ENSMUSG00000029909	Prss37	Protease, serine 37	-1.01284	0.158244	6.4005	1.54871e-10	4.70736e-08
ENSMUSG00000041255	Tmco5b	Transmembrane and coiled-coil domains 5B	-1.01625	0.224347	4.5298	5.90396e-06	0.000466869
ENSMUSG00000072624	Gm5460	Predicted gene 5460	-1.01695	0.344899	2.94855	0.00319271	0.0650342
ENSMUSG00000091844	Gm8251	Predicted gene 8251	-1.0191	0.213449	4.77444	1.80207e-06	0.000164581
ENSMUSG00000038572	Bpifb5	BPI fold containing family B, member 5	-1.01983	0.3481	2.9297	0.0033929	0.0680527
ENSMUSG00000031380	Vegfd	Vascular endothelial growth factor D	-1.01995	0.270314	3.77322	0.000161155	0.00688999
ENSMUSG00000101492	Gm29089	Predicted gene 29089	-1.01997	0.253424	4.02476	5.70343e-05	0.00299862
ENSMUSG00000087358	4930453H23Rik		-1.02193	0.279465	3.65675	0.000255434	0.0101823
ENSMUSG00000089743	Gm16226	Predicted gene 16226	-1.02479	0.239633	4.27651	1.89848e-05	0.00121086
ENSMUSG00000027674	Pex5l	Peroxisomal biogenesis factor 5-like	-1.02546	0.163861	6.25808	3.89735e-10	9.97569e-08
ENSMUSG00000112371	Gm7791	Predicted gene 7791	-1.02811	0.310353	3.3127	0.000923999	0.026629
ENSMUSG00000031559	4930555F03Rik		-1.02818	0.371571	2.7671	0.00565566	0.0935541
ENSMUSG00000016493	Cd46	CD46 antigen, complement regulatory protein	-1.03042	0.243417	4.23313	2.30463e-05	0.00143692
ENSMUSG00000026922	Agpat2	1-acylglycerol-3-phosphate O-acyltransferase 2 (lysophosphatidic acid acyltransferase, beta)	-1.03307	0.197639	5.22705	1.72235e-07	2.29028e-05
ENSMUSG00000022798	Tex55	Testis expressed 55	-1.03359	0.202695	5.09923	3.41032e-07	4.13693e-05
ENSMUSG00000039956	Mrap	Melanocortin 2 receptor accessory protein	-1.03391	0.241257	4.28553	1.82302e-05	0.00117818
ENSMUSG00000025020	Slit1	Slit guidance ligand 1	-1.03477	0.365067	2.83447	0.00459015	0.0827546
ENSMUSG00000050612	Txndc2	Thioredoxin domain containing 2 (spermatozoa)	-1.03596	0.152397	6.79779	1.06238e-11	4.49272e-09
ENSMUSG00000095247	Ccl27a	Chemokine (C-C motif) ligand 27A	-1.03604	0.325393	3.18396	0.00145274	0.0376683
ENSMUSG00000032725	Folr2	Folate receptor 2 (fetal)	-1.03608	0.353146	2.93385	0.00334783	0.0675575
ENSMUSG00000052025	Ppp1r2-ps7	Protein phosphatase 1, regulatory (inhibitor) subunit 2, pseudogene 7	-1.03844	0.250684	4.14242	3.43664e-05	0.00199197
ENSMUSG00000079722	Ttll2	Tubulin tyrosine ligase-like family, member 2	-1.03975	0.366558	2.83653	0.00456062	0.0822985
ENSMUSG00000064267	Hvcn1	Hydrogen voltage-gated channel 1	-1.04231	0.363812	2.86496	0.00417062	0.0774892
ENSMUSG00000050860	Phospho1	Phosphatase, orphan 1	-1.04384	0.372417	2.80288	0.00506492	0.0873474
ENSMUSG00000100431	4930558N11Rik		-1.04415	0.358727	2.9107	0.00360618	0.0710031
ENSMUSG00000017418	Arl5b	ADP-ribosylation factor-like 5B	-1.04683	0.175062	5.97979	2.23425e-09	4.77614e-07
ENSMUSG00000047518	Slfnl1	Schlafen like 1	-1.04972	0.181626	5.77958	7.48861e-09	1.40073e-06
ENSMUSG00000018844	Fndc8	Fibronectin type III domain containing 8	-1.0536	0.178389	5.90617	3.50147e-09	6.95042e-07
ENSMUSG00000066383	Iqcf1	IQ motif containing F1	-1.05515	0.193948	5.44039	5.31626e-08	8.07947e-06
ENSMUSG00000030137	Tuba8	Tubulin, alpha 8	-1.05542	0.154209	6.84407	7.69747e-12	3.32753e-09
ENSMUSG00000027962	Vcam1	Vascular cell adhesion molecule 1	-1.05584	0.161736	6.52814	6.65905e-11	2.23342e-08
ENSMUSG00000101894	1700016P04Rik		-1.05724	0.312129	3.3872	0.000706102	0.0220478
ENSMUSG00000070388	Fbxo39	F-box protein 39	-1.06277	0.199364	5.33079	9.7785e-08	1.38848e-05
ENSMUSG00000049653	Spatc1	Spermatogenesis and centriole associated 1	-1.06558	0.199842	5.33213	9.70668e-08	1.38841e-05
ENSMUSG00000043429	Ccdc185	Coiled-coil domain containing 185	-1.0668	0.155775	6.84835	7.47065e-12	3.30287e-09
ENSMUSG00000094854	Gm5334	Predicted pseudogene 5334	-1.06708	0.354152	3.01306	0.00258627	0.0568067
ENSMUSG00000026836	Acvr1	Activin A receptor, type 1	-1.06983	0.240849	4.44191	8.91639e-06	0.000649627
ENSMUSG00000002944	Cd36	CD36 molecule	-1.07255	0.25754	4.16459	3.11906e-05	0.00185551
ENSMUSG00000101051	1700100L14Rik		-1.07351	0.353701	3.03507	0.00240482	0.0540196
ENSMUSG00000020270	Smim23	Small integral membrane protein 23	-1.07457	0.212721	5.05154	4.38273e-07	5.04481e-05
ENSMUSG00000029759	Pon3	Paraoxonase 3	-1.07625	0.244138	4.40839	1.04144e-05	0.000744822
ENSMUSG00000037447	Arid5a	AT rich interactive domain 5A (MRF1-like)	-1.07822	0.343553	3.13843	0.00169857	0.0423425
ENSMUSG00000029569	Tmem168	Transmembrane protein 168	-1.07921	0.156504	6.89576	5.3576e-12	2.42375e-09
ENSMUSG00000004415	Col26a1	Collagen, type XXVI, alpha 1	-1.08755	0.246824	4.40619	1.05206e-05	0.00074966
ENSMUSG00000089887	4931403M11Rik		-1.08805	0.250275	4.34743	1.37742e-05	0.000936884
ENSMUSG00000022455	Wbp2nl	WBP2 N-terminal like	-1.09062	0.188005	5.80101	6.59165e-09	1.25713e-06
ENSMUSG00000007907	Cabs1	Calcium binding protein, spermatid specific 1	-1.09203	0.167388	6.52393	6.8489e-11	2.25816e-08
ENSMUSG00000087104	Tmem132cos	Transmembrane protein 132C, opposite strand	-1.09822	0.271702	4.04201	5.29953e-05	0.00281025
ENSMUSG00000054545	Ugt1a6a	UDP glucuronosyltransferase 1 family, polypeptide A6A	-1.09945	0.164517	6.68294	2.34194e-11	8.76109e-09
ENSMUSG00000074715	Ccl28	Chemokine (C-C motif) ligand 28	-1.10125	0.276706	3.97986	6.89544e-05	0.00348408
ENSMUSG00000017720	Trp53tg5	Transformation related protein 53 target 5	-1.10145	0.197736	5.5703	2.54305e-08	4.19237e-06
ENSMUSG00000026226	Spata3	Spermatogenesis associated 3	-1.10984	0.303772	3.65355	0.000258644	0.0102681
ENSMUSG00000063681	Crb1	Crumbs family member 1, photoreceptor morphogenesis associated	-1.11509	0.380633	2.92957	0.0033943	0.0680527
ENSMUSG00000027869	Hsd3b6	Hydroxy-delta-5-steroid dehydrogenase, 3 beta- and steroid delta-isomerase 6	-1.11857	0.105199	10.6329	2.09543e-26	1.01906e-22
ENSMUSG00000085486	Gm11634		-1.12001	0.356205	3.14429	0.00166488	0.0417799
ENSMUSG00000086112	4930563I02Rik		-1.12009	0.365883	3.06133	0.00220353	0.0507883
ENSMUSG00000051437	Ubqlnl	Ubiquilin-like	-1.12009	0.153779	7.28379	3.24574e-13	1.85704e-10
ENSMUSG00000030161	Gabarapl1	Gamma-aminobutyric acid (GABA) A receptor-associated protein-like 1	-1.12109	0.264892	4.23227	2.31344e-05	0.00143781
ENSMUSG00000102096	1700101O22Rik		-1.12272	0.287483	3.90534	9.40922e-05	0.00448622
ENSMUSG00000056973	Ces1d	Carboxylesterase 1D	-1.12318	0.344495	3.26038	0.00111263	0.0305705
ENSMUSG00000090124	Ugt1a7c	UDP glucuronosyltransferase 1 family, polypeptide A7C	-1.12912	0.239852	4.70757	2.5069e-06	0.000223326
ENSMUSG00000060726	Tmsb15a	Thymosin beta 15a	-1.1375	0.336129	3.38411	0.000714101	0.0222263
ENSMUSG00000086373	Gm11978	Predicted gene 11978	-1.1406	0.24425	4.6698	3.01494e-06	0.000259511
ENSMUSG00000023151	Lrrc69	Leucine rich repeat containing 69	-1.14362	0.225688	5.06723	4.03639e-07	4.73012e-05
ENSMUSG00000097717	1700066J03Rik		-1.14926	0.408026	2.81663	0.00485303	0.0855902
ENSMUSG00000028332	Hemgn	Hemogen	-1.15802	0.161638	7.16428	7.81949e-13	4.22535e-10
ENSMUSG00000110899	Gm48840	Predicted gene, 48840	-1.15875	0.315137	3.67698	0.000236007	0.00954917
ENSMUSG00000025783	4930412O13Rik		-1.15959	0.332437	3.48816	0.000486357	0.0167453
ENSMUSG00000094445	1700015G11Rik		-1.15988	0.26901	4.31166	1.62036e-05	0.0010758
ENSMUSG00000078593	1700042G07Rik		-1.16419	0.286536	4.06297	4.84529e-05	0.00260695
ENSMUSG00000061356	Nuggc	Nuclear GTPase, germinal center associated	-1.16509	0.315122	3.69729	0.000217916	0.00900027
ENSMUSG00000097455	Gm26891	Predicted gene, 26891	-1.16743	0.316172	3.69239	0.000222152	0.00913642
ENSMUSG00000037737	Actrt3	Actin related protein T3	-1.16775	0.23074	5.06089	4.17293e-07	4.86084e-05
ENSMUSG00000020401	Fam71b	Family with sequence similarity 71, member B	-1.171	0.158368	7.39416	1.42302e-13	8.92966e-11
ENSMUSG00000091017	Fam71a	Family with sequence similarity 71, member A	-1.184	0.158433	7.47319	7.82709e-14	5.43787e-11
ENSMUSG00000095300	Gm906	Predicted gene 906	-1.18441	0.38543	3.07296	0.00211944	0.0492585
ENSMUSG00000064063	BC048507	CDNA sequence BC048507	-1.1874	0.271146	4.37919	1.19121e-05	0.000836554
ENSMUSG00000026182	Tnp1	Transition protein 1	-1.18987	0.160283	7.42355	1.14019e-13	7.39338e-11
ENSMUSG00000074849	Spata31d1c	Spermatogenesis associated 31 subfamily D, member 1C	-1.19498	0.179258	6.66626	2.62404e-11	9.6312e-09
ENSMUSG00000032566	Nudt16l2	Nudix (nucleoside diphosphate linked moiety X)-type motif 16-like 2	-1.20058	0.300999	3.98866	6.64467e-05	0.00339262
ENSMUSG00000018470	Kcnab3	Potassium voltage-gated channel, shaker-related subfamily, beta member 3	-1.20194	0.353571	3.39945	0.000675225	0.0215094
ENSMUSG00000079330	Lemd1	LEM domain containing 1	-1.20324	0.200325	6.00646	1.89621e-09	4.1917e-07
ENSMUSG00000044787	Spata32	Spermatogenesis associated 32	-1.2034	0.300762	4.00117	6.30301e-05	0.00325232
ENSMUSG00000038156	Spon1	Spondin 1, (f-spondin) extracellular matrix protein	-1.20366	0.196072	6.13886	8.31178e-10	1.99616e-07
ENSMUSG00000032451	Trim42	Tripartite motif-containing 42	-1.20449	0.241229	4.99314	5.94045e-07	6.42289e-05
ENSMUSG00000051896	Tex37	Testis expressed 37	-1.21345	0.223762	5.42293	5.86297e-08	8.84127e-06
ENSMUSG00000111712	Gm39363	Predicted gene, 39363	-1.21534	0.402955	3.01607	0.00256072	0.0564142
ENSMUSG00000021791	Dydc2	DPY30 domain containing 2	-1.22027	0.377264	3.23452	0.00121849	0.0326492
ENSMUSG00000033880	Lgals3bp	Lectin, galactoside-binding, soluble, 3 binding protein	-1.22162	0.261349	4.67427	2.94996e-06	0.000255047
ENSMUSG00000015962	1700016C15Rik		-1.22267	0.286443	4.26845	1.96832e-05	0.00124317
ENSMUSG00000022674	Ube2v2	Ubiquitin-conjugating enzyme E2 variant 2	-1.2228	0.203271	6.01561	1.79214e-09	4.00717e-07
ENSMUSG00000036924	Cst13	Cystatin 13	-1.22315	0.221349	5.52592	3.27771e-08	5.18384e-06
ENSMUSG00000038527	C1rl	Complement component 1, r subcomponent-like	-1.22411	0.429273	2.85159	0.00435015	0.0796081
ENSMUSG00000032278	Paqr5	Progestin and adipoQ receptor family member V	-1.22772	0.245885	4.99306	5.94314e-07	6.42289e-05
ENSMUSG00000091129	Iqcf6	IQ motif containing F6	-1.22888	0.411159	2.98883	0.00280046	0.0597996
ENSMUSG00000085722	Gm4916	Predicted gene 4916	-1.22897	0.368579	3.33435	0.000854978	0.0252381
ENSMUSG00000047654	Tssk6	Testis-specific serine kinase 6	-1.22904	0.234324	5.24503	1.56258e-07	2.09634e-05
ENSMUSG00000022501	Prm1	Protamine 1	-1.23043	0.174699	7.04313	1.87963e-12	9.57075e-10
ENSMUSG00000031760	Mt3	Metallothionein 3	-1.2326	0.295286	4.17425	2.98963e-05	0.00178397
ENSMUSG00000040714	Klc3	Kinesin light chain 3	-1.24262	0.277893	4.47159	7.76419e-06	0.000583153
ENSMUSG00000027482	Bpifa3	BPI fold containing family A, member 3	-1.24297	0.286225	4.34263	1.40786e-05	0.000950942
ENSMUSG00000011350	Gm5893	Predicted gene 5893	-1.2506	0.274558	4.55496	5.23966e-06	0.000422934
ENSMUSG00000051036	Ttc24	Tetratricopeptide repeat domain 24	-1.25795	0.352842	3.56521	0.000363568	0.0132941
ENSMUSG00000026822	Lcn2	Lipocalin 2	-1.25813	0.238414	5.27707	1.31267e-07	1.78569e-05
ENSMUSG00000019768	Esr1	Estrogen receptor 1 (alpha)	-1.2621	0.385305	3.27558	0.00105445	0.0293033
ENSMUSG00000017767	Spata25	Spermatogenesis associated 25	-1.26284	0.255849	4.93587	7.97937e-07	8.25652e-05
ENSMUSG00000114073	Gm30302		-1.26529	0.263087	4.80941	1.51376e-06	0.000143645
ENSMUSG00000100274	1700006F04Rik		-1.26613	0.463108	2.73399	0.00625717	0.0999348
ENSMUSG00000027442	Cst8	Cystatin 8 (cystatin-related epididymal spermatogenic)	-1.26702	0.232509	5.44933	5.05604e-08	7.7445e-06
ENSMUSG00000033122	Hsd17b3	Hydroxysteroid (17-beta) dehydrogenase 3	-1.26823	0.28971	4.37759	1.2e-05	0.000839698
ENSMUSG00000078346	H2al1n	H2A histone family member L1N	-1.2696	0.385676	3.29187	0.000995231	0.0282631
ENSMUSG00000086396	4930555B11Rik		-1.27226	0.433284	2.93633	0.00332124	0.0671601
ENSMUSG00000043050	Tnp2	Transition protein 2	-1.27229	0.160228	7.94046	2.01429e-15	1.9592e-12
ENSMUSG00000021147	Wdr37	WD repeat domain 37	-1.27235	0.124589	10.2124	1.74496e-24	6.78894e-21
ENSMUSG00000094918	Gm8765		-1.27364	0.42472	2.99878	0.00271064	0.0586542
ENSMUSG00000092499	1700092C10Rik		-1.2747	0.426642	2.98775	0.00281036	0.059814
ENSMUSG00000036574	Tex44	Testis expressed 44	-1.27724	0.205761	6.20742	5.38609e-10	1.34328e-07
ENSMUSG00000092051	Gm17229	Predicted gene 17229	-1.28138	0.444494	2.88279	0.00394174	0.0747092
ENSMUSG00000020633	Dcdc2c	Doublecortin domain containing 2C	-1.28497	0.241245	5.3264	1.00178e-07	1.41214e-05
ENSMUSG00000032554	Trf	Transferrin	-1.28642	0.168235	7.64656	2.06428e-14	1.54448e-11
ENSMUSG00000111639	1700019L13Rik		-1.28772	0.267003	4.82286	1.41513e-06	0.000135608
ENSMUSG00000098609	Anxa11os	Annexin A11, opposite strand	-1.29276	0.412044	3.13744	0.00170432	0.0423425
ENSMUSG00000019737	Syne4	Spectrin repeat containing, nuclear envelope family member 4	-1.29932	0.448551	2.89671	0.00377096	0.0727021
ENSMUSG00000098144	1700029N11Rik		-1.29993	0.438602	2.9638	0.00303867	0.0630185
ENSMUSG00000048485	Zbtb8b	Zinc finger and BTB domain containing 8b	-1.30189	0.282475	4.60886	4.04873e-06	0.000336581
ENSMUSG00000040564	Apoc1	Apolipoprotein C-I	-1.3037	0.406147	3.20993	0.00132766	0.035128
ENSMUSG00000068105	Tnfrsf13c	Tumor necrosis factor receptor superfamily, member 13c	-1.30382	0.458343	2.84464	0.00444616	0.0809842
ENSMUSG00000099869	1700030F04Rik		-1.31911	0.42545	3.1005	0.00193194	0.0462264
ENSMUSG00000038015	Prm2	Protamine 2	-1.32096	0.151665	8.7097	3.04675e-18	4.55911e-15
ENSMUSG00000106380	Gm3519	Predicted gene 3519	-1.32226	0.476213	2.77661	0.00549288	0.0920353
ENSMUSG00000096573	1700009J07Rik		-1.33834	0.299516	4.46833	7.88332e-06	0.000589824
ENSMUSG00000055882	Abhd16b	Abhydrolase domain containing 16B	-1.3418	0.210406	6.37719	1.80369e-10	5.39801e-08
ENSMUSG00000029707	Fscn3	Fascin actin-bundling protein 3	-1.34315	0.213723	6.28451	3.28895e-10	8.6927e-08
ENSMUSG00000076438	Oxct2b	3-oxoacid CoA transferase 2B	-1.34794	0.219416	6.1433	8.0822e-10	1.96529e-07
ENSMUSG00000034127	Tspan8	Tetraspanin 8	-1.35344	0.38845	3.48421	0.000493597	0.0168455
ENSMUSG00000014030	Pax5	Paired box 5	-1.36664	0.488147	2.79964	0.00511598	0.087994
ENSMUSG00000031085	Acte1	Actin, epsilon 1	-1.36689	0.320218	4.26862	1.96684e-05	0.00124317
ENSMUSG00000049902	4921517D22Rik		-1.38738	0.300821	4.61198	3.98852e-06	0.000332999
ENSMUSG00000064138	Fam172a	Family with sequence similarity 172, member A	-1.38853	0.176266	7.87746	3.34094e-15	2.95415e-12
ENSMUSG00000044921	Rassf9	Ras association (RalGDS/AF-6) domain family (N-terminal) member 9	-1.38942	0.276616	5.02293	5.08883e-07	5.75541e-05
ENSMUSG00000037254	Itih2	Inter-alpha trypsin inhibitor, heavy chain 2	-1.39665	0.170853	8.17454	2.96986e-16	3.39839e-13
ENSMUSG00000107988	Gm44006	Predicted gene, 44006	-1.39706	0.400414	3.48905	0.000484749	0.0167195
ENSMUSG00000073722	4931408C20Rik		-1.41955	0.273447	5.19131	2.08815e-07	2.67242e-05
ENSMUSG00000004655	Aqp1	Aquaporin 1	-1.43671	0.514343	2.79329	0.00521748	0.0891877
ENSMUSG00000024107	Lhcgr	Luteinizing hormone/choriogonadotropin receptor	-1.44348	0.256793	5.62118	1.89658e-08	3.26498e-06
ENSMUSG00000024939	Fam89b	Family with sequence similarity 89, member B	-1.44615	0.17348	8.33614	7.67557e-17	9.33205e-14
ENSMUSG00000093570	Gm20714	Predicted gene 20714	-1.45443	0.405901	3.58322	0.000339385	0.0126476
ENSMUSG00000052099	Prss51	Protease, serine 51	-1.45639	0.439967	3.31022	0.000932225	0.0268263
ENSMUSG00000041515	Irf8	Interferon regulatory factor 8	-1.46444	0.374565	3.90969	9.24136e-05	0.00442789
ENSMUSG00000040557	Mettl27	Methyltransferase like 27	-1.47268	0.444239	3.31506	0.000916224	0.0265228
ENSMUSG00000051663	Pcdhb1	Protocadherin beta 1	-1.47697	0.465712	3.17142	0.00151697	0.0389822
ENSMUSG00000098488	Pla2g4b	Phospholipase A2, group IVB (cytosolic)	-1.47799	0.357197	4.13773	3.50752e-05	0.00202468
ENSMUSG00000091401	Gm9252	Predicted gene 9252	-1.48851	0.38177	3.89899	9.65958e-05	0.00457197
ENSMUSG00000023032	Slc4a8	Solute carrier family 4 (anion exchanger), member 8	-1.49361	0.244152	6.11753	9.50384e-10	2.25461e-07
ENSMUSG00000067049	Unc93a	Unc-93 homolog A	-1.4992	0.487239	3.07692	0.0020915	0.0487841
ENSMUSG00000076436	Oxct2a	3-oxoacid CoA transferase 2A	-1.50856	0.238969	6.3128	2.7403e-10	7.6153e-08
ENSMUSG00000074768	Bhmt	Betaine-homocysteine methyltransferase	-1.5181	0.224729	6.75525	1.42587e-11	5.90159e-09
ENSMUSG00000046687	Gm5424	Predicted gene 5424	-1.52953	0.202429	7.55589	4.16003e-14	2.99722e-11
ENSMUSG00000046854	Pip5kl1	Phosphatidylinositol-4-phosphate 5-kinase-like 1	-1.55881	0.32347	4.81903	1.44259e-06	0.000137562
ENSMUSG00000097962	1700034G24Rik		-1.5633	0.53517	2.92113	0.00348769	0.0693014
ENSMUSG00000069324	Gm5096	Predicted gene 5096	-1.60002	0.349096	4.58332	4.57647e-06	0.000377229
ENSMUSG00000082791	Gm4875	Predicted gene 4875	-1.61391	0.453354	3.55994	0.000370934	0.0134874
ENSMUSG00000086898	Itpr3os	Inositol 1,4,5-triphosphate receptor 3, opposite strand	-1.62336	0.523538	3.10074	0.00193038	0.0462264
ENSMUSG00000040935	Padi6	Peptidyl arginine deiminase, type VI	-1.64023	0.482904	3.39659	0.000682313	0.0216683
ENSMUSG00000109750	Hmgb1-rs17	High mobility group box 1, related sequence 17	-1.65956	0.364729	4.55012	5.36153e-06	0.000430983
ENSMUSG00000032087	Dscaml1	DS cell adhesion molecule like 1	-1.67246	0.473796	3.5299	0.00041571	0.0147301
ENSMUSG00000027446	Cstdc2	Cystatin domain containing 2	-1.68766	0.466116	3.62069	0.000293814	0.011318
ENSMUSG00000073457	Smok2b	Sperm motility kinase 2B	-1.72324	0.495262	3.47944	0.000502455	0.0170283
ENSMUSG00000076441	Ass1	Argininosuccinate synthetase 1	-1.72609	0.203252	8.49238	2.02451e-17	2.81305e-14
ENSMUSG00000087250	Usp46os1	Ubiquitin specific peptidase 46, opposite strand 1	-1.76595	0.629032	2.80741	0.00499422	0.0865117
ENSMUSG00000049152	Ugt3a2	UDP glycosyltransferases 3 family, polypeptide A2	-1.77632	0.63872	2.78106	0.00541813	0.0913479
ENSMUSG00000085197	1700125H03Rik		-1.79448	0.487234	3.68299	0.000230517	0.00940095
ENSMUSG00000038583	Pln	Phospholamban	-1.80724	0.50458	3.58168	0.000341393	0.0126483
ENSMUSG00000101695	1700094J05Rik		-1.91909	0.582621	3.29389	0.000988115	0.0281218
ENSMUSG00000070366	Plpp4	Phospholipid phosphatase 4	-1.99229	0.647591	3.07646	0.00209475	0.0488014
ENSMUSG00000056133	Unc93a2	Unc-93 homolog A2	-2.00519	0.677811	2.95833	0.0030931	0.0639739
ENSMUSG00000048497	Mmgt2	Membrane magnesium transporter 2	-2.02471	0.379107	5.34074	9.25682e-08	1.33387e-05
ENSMUSG00000078747	Gm20878	Predicted gene, 20878	-2.02604	0.69745	2.90492	0.00367348	0.0714602
ENSMUSG00000063177	Klk1b27	Kallikrein 1-related peptidase b27	-2.0863	0.344155	6.06209	1.34362e-09	3.03924e-07
ENSMUSG00000063713	Klk1b24	Kallikrein 1-related peptidase b24	-2.0882	0.330486	6.31856	2.64009e-10	7.55259e-08
ENSMUSG00000050994	Adgb	Androglobin	-2.11126	0.137886	15.3117	6.3896e-53	1.24297e-48
ENSMUSG00000087145	Gm12665	Predicted gene 12665	-2.11447	0.699967	3.02082	0.00252092	0.0557266
ENSMUSG00000066516	Klk1b21	Kallikrein 1-related peptidase b21	-2.19089	0.348665	6.28367	3.30674e-10	8.6927e-08
ENSMUSG00000096105	Bhmt-ps1	Betaine-homocysteine methyltransferase, pseudogene 1	-2.20689	0.652766	3.38082	0.00072269	0.0223861
ENSMUSG00000110343	Gm45751	Predicted gene 45751	-2.25921	0.610579	3.70011	0.000215503	0.00893856
ENSMUSG00000087524	Gm14285	Predicted gene 14285	-2.41198	0.710422	3.39513	0.000685955	0.0216683
ENSMUSG00000050761	Gp1bb	Glycoprotein Ib, beta polypeptide	-2.88637	0.918336	3.14304	0.00167201	0.0418606
ENSMUSG00000017950	Hnf4a	Hepatic nuclear factor 4, alpha	-3.04899	1.07775	2.82902	0.00466901	0.0837109
ENSMUSG00000109966	Gm34623	Predicted gene, 34623	-3.2138	0.70838	4.53683	5.71066e-06	0.000457158
ENSMUSG00000090073	Gm13538	Predicted gene 13538	-3.3732	0.943582	3.57489	0.000350373	0.0128358
ENSMUSG00000037225	Fgf2	Fibroblast growth factor 2	-4.17857	0.431341	9.68738	3.41155e-22	9.4807e-19
ENSMUSG00000093987	Gm21704	Predicted gene, 21704	-5.82788	2.12751	2.7393	0.00615705	0.0989032
ENSMUSG00000109147	4930431P19Rik		-6.22152	0.625122	9.95249	2.45947e-23	7.97403e-20
ENSMUSG00000096972	Gm26883	deprecated: lincRNA; predicted gene 26883	-9.01866	1.58823	5.67844	1.35932e-08	2.4713e-06
ENSMUSG00000079271	1700049E17Rik1		-10.8821	1.48158	7.34493	2.05862e-13	1.21353e-10
ENSMUSG00000104789	Gm43640	predicted gene 43640	-23.4628	4.78506	4.90335	9.42152e-07	9.59565e-05
ENSMUSG00000073245	Gm14819	predicted gene 14819	-23.755	4.785	4.96448	6.88862e-07	7.17724e-05
