# Supplementary material for: Androglobin, a chimeric mammalian globin, is required for male fertility
Source: eLife. 2022 Jun 14;11:e72374. doi: 10.7554/eLife.72374 (PMC9249397; doi:10.7554/eLife.72374)
Supplement: Figure 4—source data 4. [file elife-72374-fig4-data4.xlsx]

## Sheet: proteinGroups
Protein IDs	Protein names	Gene names	Fasta headers	Number of proteins	Peptides	Sequence coverage [%]	Mol. weight [kDa]	Sequence length	Q-value	Score	iBAQ	iBAQ IgG1	iBAQ IgG2	iBAQ ADGB1	iBAQ ADGB2	iBAQ ADGB3	log2 (ADGB(mean)/IgG(mean))	log2 (ADGB(mean))	log2 (IgG(mean)	id
Q505K2	Protein FAM160A1	Fam160a1	sp|Q505K2|F16A1_MOUSE Protein FAM160A1 OS=Mus musculus GN=Fam160a1 PE=1 SV=2	1	22	21.6	120.22	1081	0	156.58	39092000	58021	11948	7672200	8654900	10720000	8.49426	2.26806	-6.2262	1853
Q9D9F8	Mirror-image polydactyly gene 1 protein homolog	Mipol1	sp|Q9D9F8|MIPO1_MOUSE Mirror-image polydactyly gene 1 protein homolog OS=Mus musculus GN=Mipol1 PE=2 SV=1	1	11	46.2	31.751	279	0	87.054	24818000	0	50504	5790000	5734400	6641900	7.02661	1.70453	-5.32208	4325
A2AI08	Taperin	Tprn	sp|A2AI08|TPRN_MOUSE Taperin OS=Mus musculus GN=Tprn PE=1 SV=1	1	16	26.7	80.088	749	0	184.36	44706000	101850	77338	6627800	22264000	6785800	6.90526	2.43216	-4.4731	75
Q7TSZ8	Nucleus accumbens-associated protein 1	Nacc1	sp|Q7TSZ8|NACC1_MOUSE Nucleus accumbens-associated protein 1 OS=Mus musculus GN=Nacc1 PE=1 SV=1	1	13	27.6	56.536	514	0	34.488	34309000	35324	201800	6863400	4190300	6969300	6.20371	1.65859	-4.54513	2483
Q6A037	NEDD4-binding protein 1	N4bp1	sp|Q6A037|N4BP1_MOUSE NEDD4-binding protein 1 OS=Mus musculus GN=N4bp1 PE=1 SV=2	1	6	8.5	99.146	893	0.00026434	5.073	187130000	880680	876140	52906000	52242000	47068000	5.93871	4.77265	-1.16606	2192
Q8BPZ8	BRCA1-A complex subunit Abraxas	Fam175a	sp|Q8BPZ8|F175A_MOUSE BRCA1-A complex subunit Abraxas OS=Mus musculus GN=Fam175a PE=1 SV=1	1	15	38.6	46.039	407	0	323.31	199850000	394730	2154900	45540000	42858000	45464000	5.6844	4.58866	-1.09574	2795
Q3UI43	BRISC and BRCA1-A complex member 1	Babam1	sp|Q3UI43|BABA1_MOUSE BRISC and BRCA1-A complex member 1 OS=Mus musculus GN=Babam1 PE=1 SV=1	1	12	42.9	36.793	333	0	92.978	51978000	350550	0	8034500	11945000	13208000	5.67412	2.54555	-3.12857	1740
P59759	MKL/myocardin-like protein 2	Mkl2	sp|P59759|MKL2_MOUSE MKL/myocardin-like protein 2 OS=Mus musculus GN=Mkl2 PE=1 SV=1	1	3	4	117.55	1080	0.00026226	4.9217	19010000	0	0	2556800	7025700	119900	5.63461	-0.521446	-6.15605	1222
P18529;A0A075B5P9;P18527	Ig heavy chain V region 5-76;Ig heavy chain V region 914	Ighv5-4	sp|P18529|HVM58_MOUSE Ig heavy chain V region 5-76 OS=Mus musculus PE=1 SV=1;tr|A0A075B5P9|A0A075B5P9_MOUSE Protein Ighv5-4 (Fragment) OS=Mus musculus GN=Ighv5-4 PE=4 SV=1;sp|P18527|HVM56_MOUSE Ig heavy chain V region 914 OS=Mus musculus PE=1 SV=1	3	2	15.4	12.991	117	0.00027375	5.6981	725110000	5601500	4113600	215660000	192750000	183630000	5.44679	6.73088	1.28409	860
Q00897	Alpha-1-antitrypsin 1-4	Serpina1d	sp|Q00897|A1AT4_MOUSE Alpha-1-antitrypsin 1-4 OS=Mus musculus GN=Serpina1d PE=1 SV=1	1	13	32.2	45.998	413	0	323.31	308060000	36192	58397000	81816000	69190000	34458000	5.40665	4.96745	-0.439202	1512
Q9D6R2	Isocitrate dehydrogenase [NAD] subunit alpha, mitochondrial	Idh3a	sp|Q9D6R2|IDH3A_MOUSE Isocitrate dehydrogenase [NAD] subunit alpha, mitochondrial OS=Mus musculus GN=Idh3a PE=1 SV=1	1	2	5.7	39.638	366	0.0031021	2.5412	6358300	85098	0	1796000	2198000	2279200	5.28855	0.166095	-5.12246	4250
G3UZ78	Androglobin	Adgb	sp|G3UZ78|ADGB_MOUSE Androglobin OS=Mus musculus GN=Adgb PE=1 SV=1	1	76	47.9	188.55	1657	0	323.31	312440000	2259700	3593700	94914000	90428000	120570000	5.23814	5.76992	0.53178	401
Q8K3W0	BRCA1-A complex subunit BRE	Bre	sp|Q8K3W0|BRE_MOUSE BRCA1-A complex subunit BRE OS=Mus musculus GN=Bre PE=1 SV=2	1	13	33.4	43.544	383	0	84.516	93212000	733860	532740	18456000	18467000	19752000	5.00501	3.34853	-1.65648	3243
Q9Z2Q6	Septin-5	Septin-5	sp|Q9Z2Q6|SEPT5_MOUSE Septin-5 OS=Mus musculus GN=Sept5 PE=1 SV=2	1	6	16.8	42.747	369	0	8.7879	7044400	58535	70279	2072200	2430600	1188100	4.91165	-0.0300296	-4.94168	4938
Q5U5Q9	BRCA1-A complex subunit RAP80	Uimc1	sp|Q5U5Q9|UIMC1_MOUSE BRCA1-A complex subunit RAP80 OS=Mus musculus GN=Uimc1 PE=1 SV=2	1	13	20.8	81.477	727	0	80.291	29745000	212410	301720	6324100	6452100	7636000	4.83166	1.87074	-2.96092	1932
Q9EQU5	Protein SET	Set	sp|Q9EQU5|SET_MOUSE Protein SET OS=Mus musculus GN=Set PE=1 SV=1	1	5	21.1	33.377	289	0	94.207	71682000	0	14558000	16979000	17928000	8650900	4.76895	2.89715	-1.8718	4510
P83510;Q9JM52	Traf2 and NCK-interacting protein kinase	Tnik	sp|P83510|TNIK_MOUSE Traf2 and NCK-interacting protein kinase OS=Mus musculus GN=Tnik PE=1 SV=2	2	12	10.9	150.37	1323	0	23.065	2746700	21150	23859	311590	1495500	352100	4.69567	-1.75961	-6.45528	1429
Q8C9J3	Sperm flagellar protein 2	Spef2	sp|Q8C9J3|SPEF2_MOUSE Sperm flagellar protein 2 OS=Mus musculus GN=Spef2 PE=2 SV=2	1	15	11.5	199.14	1734	0	18.673	2030800	24973	27441	762990	559780	598060	4.68779	-1.54673	-6.23453	3009
Q9Z0F7	Gamma-synuclein	Sncg	sp|Q9Z0F7|SYUG_MOUSE Gamma-synuclein OS=Mus musculus GN=Sncg PE=1 SV=1	1	3	39.8	13.159	123	0.00027367	5.6827	3523000	0	0	493650	1200900	1828400	4.66289	-0.851654	-5.51454	4867
O09174	Alpha-methylacyl-CoA racemase	Amacr	sp|O09174|AMACR_MOUSE Alpha-methylacyl-CoA racemase OS=Mus musculus GN=Amacr PE=1 SV=4	1	6	19.9	41.704	381	0	18.178	4584600	56992	40135	877270	2420300	588670	4.58193	-0.783138	-5.36507	483
Q8C9M8		Zfp446	tr|Q8C9M8|Q8C9M8_MOUSE Protein Zfp446 OS=Mus musculus GN=Zfp446 PE=1 SV=1	1	6	11.7	57.975	523	0	6.8579	2252800	22834	14924	528600	450040	293560	4.56809	-2.17037	-6.73847	3010
Q9DBJ1	Phosphoglycerate mutase 1	Pgam1	sp|Q9DBJ1|PGAM1_MOUSE Phosphoglycerate mutase 1 OS=Mus musculus GN=Pgam1 PE=1 SV=3	1	15	53.9	28.832	254	0	317.42	601630000	144240	162780000	109710000	135310000	81729000	4.54877	5.84641	1.29764	4431
P08228	Superoxide dismutase [Cu-Zn]	Sod1	sp|P08228|SODC_MOUSE Superoxide dismutase [Cu-Zn] OS=Mus musculus GN=Sod1 PE=1 SV=2	1	4	32.5	15.942	154	0	147.84	860030000	338100	161190000	174250000	170670000	139100000	4.53123	6.43628	1.90505	754
Q3UHX2	28 kDa heat- and acid-stable phosphoprotein	Pdap1	sp|Q3UHX2|HAP28_MOUSE 28 kDa heat- and acid-stable phosphoprotein OS=Mus musculus GN=Pdap1 PE=1 SV=1	1	8	37	20.605	181	0	125.24	59490000	0	10452000	10454000	21084000	13474000	4.52051	2.95498	-1.56553	1738
Q8C650	Septin-10	Septin-10	sp|Q8C650|SEP10_MOUSE Septin-10 OS=Mus musculus GN=Sept10 PE=1 SV=1	1	15	40.5	52.422	452	0	112.86	107050000	1183400	1344300	22517000	34924000	25028000	4.50857	3.86445	-0.644124	2987
P26350;J3QPK6	Prothymosin alpha;Prothymosin alpha, N-terminally processed;Thymosin alpha	Ptma	sp|P26350|PTMA_MOUSE Prothymosin alpha OS=Mus musculus GN=Ptma PE=1 SV=2	2	5	35.1	12.254	111	0	21.652	32869000	0	3006100	2939300	10939000	5457800	4.47412	1.59466	-2.87946	921
P06745;F6SAC3;CON__Q3ZBD7	Glucose-6-phosphate isomerase	Gpi;Gm1840	sp|P06745|G6PI_MOUSE Glucose-6-phosphate isomerase OS=Mus musculus GN=Gpi PE=1 SV=4;tr|F6SAC3|F6SAC3_MOUSE Glucose-6-phosphate isomerase OS=Mus musculus GN=Gm1840 PE=1 SV=1	3	18	37.3	62.766	558	0	215.89	116240000	76257	16603000	25386000	29445000	15497000	4.41836	3.60954	-0.808827	736
P31786	Acyl-CoA-binding protein	Dbi	sp|P31786|ACBP_MOUSE Acyl-CoA-binding protein OS=Mus musculus GN=Dbi PE=1 SV=2	1	3	55.2	10	87	0	23.917	139900000	0	36555000	21811000	34189000	19963000	4.30838	3.73016	-0.57822	969
Q00898	Alpha-1-antitrypsin 1-5	Serpina1e	sp|Q00898|A1AT5_MOUSE Alpha-1-antitrypsin 1-5 OS=Mus musculus GN=Serpina1e PE=1 SV=1	1	11	30.5	45.891	413	0	111.65	53753000	31247	8624100	8566200	14646000	5427800	4.17165	2.24675	-1.9249	1513
Q8BMF4	Dihydrolipoyllysine-residue acetyltransferase component of pyruvate dehydrogenase complex, mitochondrial	Dlat	sp|Q8BMF4|ODP2_MOUSE Dihydrolipoyllysine-residue acetyltransferase component of pyruvate dehydrogenase complex, mitochondrial OS=Mus musculus GN=Dlat PE=1 SV=2	1	11	23.5	67.941	642	0	32.308	270920000	4947200	3232200	81191000	74762000	51210000	4.17099	5.19154	1.02054	2761
P54227	Stathmin	Stmn1	sp|P54227|STMN1_MOUSE Stathmin OS=Mus musculus GN=Stmn1 PE=1 SV=2	1	9	48.3	17.274	149	0	50.667	123620000	0	19651000	13129000	37332000	22748000	4.16863	3.59116	-0.577475	1157
Q8C1B7	Septin-11	Septin-11	sp|Q8C1B7|SEP11_MOUSE Septin-11 OS=Mus musculus GN=Sept11 PE=1 SV=4	1	13	33.4	49.694	431	0	91.884	27693000	340160	518000	5358400	10458000	5935700	4.13354	1.90218	-2.23137	2939
P01027	Complement C3;Complement C3 beta chain;C3-beta-c;Complement C3 alpha chain;C3a anaphylatoxin;Acylation stimulating protein;Complement C3b alpha chain;Complement C3c alpha chain fragment 1;Complement C3dg fragment;Complement C3g fragment;Complement C3d fragment;Complement C3f fragment;Complement C3c alpha chain fragment 2	C3	sp|P01027|CO3_MOUSE Complement C3 OS=Mus musculus GN=C3 PE=1 SV=3	1	26	17.1	186.48	1663	0	36.395	6082400	5943.6	981510	1490600	1106100	1152500	4.10801	-0.581693	-4.68971	694
Q9JM14	5(3)-deoxyribonucleotidase, cytosolic type	Nt5c	sp|Q9JM14|NT5C_MOUSE 5(3)-deoxyribonucleotidase, cytosolic type OS=Mus musculus GN=Nt5c PE=1 SV=1	1	4	26.5	23.076	200	0	19.81	19280000	0	4439500	3415700	4896300	2729100	4.05886	0.947026	-3.11183	4650
Q9DCL8	Protein phosphatase inhibitor 2	Ppp1r2	sp|Q9DCL8|IPP2_MOUSE Protein phosphatase inhibitor 2 OS=Mus musculus GN=Ppp1r2 PE=1 SV=3	1	9	28.6	23.119	206	0	38.768	95306000	70766	18952000	13948000	27402000	14997000	4.03847	3.27119	-0.767282	4467
Q9QUR6	Prolyl endopeptidase	Prep	sp|Q9QUR6|PPCE_MOUSE Prolyl endopeptidase OS=Mus musculus GN=Prep PE=1 SV=1	1	16	27.3	80.751	710	0	27.256	5509500	23190	272530	1173000	1624600	910500	4.00655	-0.625401	-4.63195	4668
Q7M757	Lys-63-specific deubiquitinase BRCC36-like	C6.1al	sp|Q7M757|BRC3L_MOUSE Lys-63-specific deubiquitinase BRCC36-like OS=Mus musculus GN=C6.1al PE=2 SV=1	1	13	45.7	33.079	291	0	69.073	57842000	691760	1039800	10929000	14045000	13471000	3.99757	2.78088	-1.2167	2437
P48428	Tubulin-specific chaperone A	Tbca	sp|P48428|TBCA_MOUSE Tubulin-specific chaperone A OS=Mus musculus GN=Tbca PE=1 SV=3	1	7	31.5	12.758	108	0	36.085	56592000	0	9869500	6702000	18089000	7670600	3.96994	2.39658	-1.57336	1082
P62965	Cellular retinoic acid-binding protein 1	Crabp1	sp|P62965|RABP1_MOUSE Cellular retinoic acid-binding protein 1 OS=Mus musculus GN=Crabp1 PE=1 SV=2	1	7	52.6	15.591	137	0	16.835	17643000	0	3063400	2885100	6731300	2765900	3.92012	1.02534	-2.89478	1343
Q8BMD2	Zinc finger protein DZIP1	Dzip1	sp|Q8BMD2|DZIP1_MOUSE Zinc finger protein DZIP1 OS=Mus musculus GN=Dzip1 PE=2 SV=3	1	10	14	97.262	852	0	20.612	6901900	95601	90161	1405700	1523600	1075600	3.91901	-0.489102	-4.40811	2760
P29699	Alpha-2-HS-glycoprotein	Ahsg	sp|P29699|FETUA_MOUSE Alpha-2-HS-glycoprotein OS=Mus musculus GN=Ahsg PE=1 SV=1	1	3	13.3	37.325	345	0	185.17	25196000	0	3648000	5723100	7768600	1905900	3.91593	1.24457	-2.67137	956
Q03401	Cysteine-rich secretory protein 1	Crisp1	sp|Q03401|CRIS1_MOUSE Cysteine-rich secretory protein 1 OS=Mus musculus GN=Crisp1 PE=2 SV=1	1	2	8.6	27.679	244	0	6.88	7123100	0	0	0	5318800	1640800	3.89467	-1.18821	-5.08289	1532
Q4VAA2	Protein CDV3	Cdv3	sp|Q4VAA2|CDV3_MOUSE Protein CDV3 OS=Mus musculus GN=Cdv3 PE=1 SV=2	1	6	30.6	29.729	281	0	11.124	8152200	30603	706370	1932100	3143900	1351700	3.86696	0.122093	-3.74486	1842
Q3UPP8	Centrosomal protein of 63 kDa	Cep63	sp|Q3UPP8|CEP63_MOUSE Centrosomal protein of 63 kDa OS=Mus musculus GN=Cep63 PE=1 SV=2	1	12	18.6	80.448	700	0	24.146	8645000	218920	94074	1627600	1741000	2693300	3.86675	0.0869385	-3.77981	1770
Q8K2H2	OTU domain-containing protein 6B	Otud6b	sp|Q8K2H2|OTU6B_MOUSE OTU domain-containing protein 6B OS=Mus musculus GN=Otud6b PE=1 SV=1	1	2	9.2	33.758	294	0.0039156	2.3379	1222700	0	0	284460	568030	172810	3.85416	-2.61121	-6.46537	3207
E9PW83		Fam184a	tr|E9PW83|E9PW83_MOUSE Protein Fam184a OS=Mus musculus GN=Fam184a PE=1 SV=1	1	2	1.6	132.97	1143	0.005351	2.1809	654320	12127	8464.8	279180	108790	84618	3.84558	-3.75841	-7.60399	279
P70349	Histidine triad nucleotide-binding protein 1	Hint1	sp|P70349|HINT1_MOUSE Histidine triad nucleotide-binding protein 1 OS=Mus musculus GN=Hint1 PE=1 SV=3	1	6	71.4	13.777	126	0	323.31	301920000	273840	65149000	54201000	90081000	34692000	3.80005	4.89957	1.09952	1402
P70202	Latexin	Lxn	sp|P70202|LXN_MOUSE Latexin OS=Mus musculus GN=Lxn PE=1 SV=2	1	1	5.4	25.492	222	0.0030682	2.4271	2691800	0	0	720160	878570	549760	3.78348	-1.39824	-5.18173	1388
Q3TGF2	Protein FAM107B	Fam107b	sp|Q3TGF2|F107B_MOUSE Protein FAM107B OS=Mus musculus GN=Fam107b PE=1 SV=2	1	3	25.2	15.572	131	0	27.185	12992000	0	2512400	1989900	4694200	2019700	3.77733	0.522164	-3.25517	1632
Q93092	Transaldolase	Taldo1	sp|Q93092|TALDO_MOUSE Transaldolase OS=Mus musculus GN=Taldo1 PE=1 SV=2	1	13	34.4	37.387	337	0	52.535	44598000	0	7192500	11405000	11102000	4614500	3.77127	2.1731	-1.59818	3694
P22599	Alpha-1-antitrypsin 1-2	Serpina1b	sp|P22599|A1AT2_MOUSE Alpha-1-antitrypsin 1-2 OS=Mus musculus GN=Serpina1b PE=1 SV=2	1	12	30.3	45.974	413	0	86.465	42419000	0	6667300	10148000	7590800	6438700	3.75952	2.09431	-1.66521	889
Q60973	Histone-binding protein RBBP7	Rbbp7	sp|Q60973|RBBP7_MOUSE Histone-binding protein RBBP7 OS=Mus musculus GN=Rbbp7 PE=1 SV=1	1	9	28.5	47.789	425	0	9.3326	6502700	719300	0	1673500	2043300	1234300	3.75219	-0.19792	-3.95011	1983
Q8C5P5	5-nucleotidase domain-containing protein 1	Nt5dc1	sp|Q8C5P5|NT5D1_MOUSE 5-nucleotidase domain-containing protein 1 OS=Mus musculus GN=Nt5dc1 PE=1 SV=2	1	2	4.3	53.094	467	0.0016309	3.0859	1268800	0	75647	396780	388050	308810	3.75192	-2.35523	-6.10716	2971
P51859	Hepatoma-derived growth factor	Hdgf	sp|P51859|HDGF_MOUSE Hepatoma-derived growth factor OS=Mus musculus GN=Hdgf PE=1 SV=2	1	9	40.5	26.268	237	0	25.4	25595000	0	5956000	4123300	6907000	4146200	3.71862	1.40414	-2.31447	1127
Q9D5U5	Pseudouridine-5-phosphatase	Hdhd1	sp|Q9D5U5|HDHD1_MOUSE Pseudouridine-5-phosphatase OS=Mus musculus GN=Pudp PE=1 SV=1	1	3	20.5	26.161	234	0.00027917	6.0745	8883000	0	886990	2357700	2416000	1511700	3.7021	0.144984	-3.55712	4234
P07724	Serum albumin	Alb	sp|P07724|ALBU_MOUSE Serum albumin OS=Mus musculus GN=Alb PE=1 SV=3	1	27	45.6	68.692	608	0	323.31	1251300000	1761900	230340000	329870000	238820000	186790000	3.69317	7.04653	3.35336	742
O35215	D-dopachrome decarboxylase	Ddt	sp|O35215|DOPD_MOUSE D-dopachrome decarboxylase OS=Mus musculus GN=Ddt PE=1 SV=3	1	11	95.8	13.077	118	0	226.54	611700000	503440	141520000	81082000	161000000	79318000	3.67184	5.77019	2.09836	495
Q3UM45	Protein phosphatase 1 regulatory subunit 7	Ppp1r7	sp|Q3UM45|PP1R7_MOUSE Protein phosphatase 1 regulatory subunit 7 OS=Mus musculus GN=Ppp1r7 PE=1 SV=2	1	14	43.5	41.291	361	0	57.15	25269000	0	5540800	5226800	6058100	2752100	3.66426	1.25803	-2.40623	1759
Q8R016	Bleomycin hydrolase	Blmh	sp|Q8R016|BLMH_MOUSE Bleomycin hydrolase OS=Mus musculus GN=Blmh PE=1 SV=1	1	6	17.4	52.511	455	0	8.3221	5614300	0	352250	1980600	1850000	548210	3.65602	-0.554987	-4.211	3272
Q8CAY6	Acetyl-CoA acetyltransferase, cytosolic	Acat2	sp|Q8CAY6|THIC_MOUSE Acetyl-CoA acetyltransferase, cytosolic OS=Mus musculus GN=Acat2 PE=1 SV=2	1	8	25.9	41.297	397	0	35.613	20151000	44569	2287100	3505100	5253400	2642900	3.60404	0.977869	-2.62617	3016
Q99KK7	Dipeptidyl peptidase 3	Dpp3	sp|Q99KK7|DPP3_MOUSE Dipeptidyl peptidase 3 OS=Mus musculus GN=Dpp3 PE=1 SV=2	1	14	24	82.897	738	0	55.787	7926000	20357	824650	1843500	2174000	784050	3.58746	-0.339802	-3.92726	3741
P24472	Glutathione S-transferase A4	Gsta4	sp|P24472|GSTA4_MOUSE Glutathione S-transferase A4 OS=Mus musculus GN=Gsta4 PE=1 SV=3	1	9	36.5	25.564	222	0	101.43	368110000	761430	53429000	75206000	94777000	51303000	3.57552	5.26966	1.69415	907
P17742;F8VPN3;V9GX31	Peptidyl-prolyl cis-trans isomerase A;Peptidyl-prolyl cis-trans isomerase A, N-terminally processed	Ppia	sp|P17742|PPIA_MOUSE Peptidyl-prolyl cis-trans isomerase A OS=Mus musculus GN=Ppia PE=1 SV=2	3	10	54.3	17.971	164	0	191.2	928610000	1739900	148900000	186610000	286890000	107700000	3.56638	6.59596	3.02958	853
E9Q557	Desmoplakin	Dsp	sp|E9Q557|DESP_MOUSE Desmoplakin OS=Mus musculus GN=Dsp PE=1 SV=1	1	32	10.9	332.91	2883	0	49.642	1616100	4355.4	28820	80565	1435900	16752	3.56474	-3.89416	-7.4589	329
Q00896;P07758	Alpha-1-antitrypsin 1-3;Alpha-1-antitrypsin 1-1	Serpina1c;Serpina1a	sp|Q00896|A1AT3_MOUSE Alpha-1-antitrypsin 1-3 OS=Mus musculus GN=Serpina1c PE=1 SV=2;sp|P07758|A1AT1_MOUSE Alpha-1-antitrypsin 1-1 OS=Mus musculus GN=Serpina1a PE=1 SV=4	2	13	35.7	45.823	412	0	181.78	129210000	303810	18160000	42028000	27785000	15248000	3.56333	3.81628	0.252947	744
Q922E4	Ethanolamine-phosphate cytidylyltransferase	Pcyt2	sp|Q922E4|PCY2_MOUSE Ethanolamine-phosphate cytidylyltransferase OS=Mus musculus GN=Pcyt2 PE=1 SV=1	1	5	16.1	45.234	404	0.00027093	5.545	1555800	0	81021	355600	488450	318760	3.55583	-2.28202	-5.83785	3649
P23953	Carboxylesterase 1C	Ces1c	sp|P23953|EST1C_MOUSE Carboxylesterase 1C OS=Mus musculus GN=Ces1c PE=1 SV=4	1	14	26.2	61.055	554	0	81.571	33763000	68924	6096800	7552500	8926200	5328100	3.54355	1.93913	-1.60442	902
Q8C633	Calcium-binding and spermatid-specific protein 1	Cabs1	sp|Q8C633|CABS1_MOUSE Calcium-binding and spermatid-specific protein 1 OS=Mus musculus GN=Cabs1 PE=1 SV=1	1	15	51.7	42.301	391	0	323.31	115590000	314740	15863000	26603000	33055000	15990000	3.52184	3.70273	0.180893	2984
P00920	Carbonic anhydrase 2	Ca2	sp|P00920|CAH2_MOUSE Carbonic anhydrase 2 OS=Mus musculus GN=Ca2 PE=1 SV=4	1	7	37.3	29.032	260	0	15.877	19285000	31135	3712500	3269500	7831500	1916600	3.51738	0.981895	-2.53548	693
Q91X72	Hemopexin	Hpx	sp|Q91X72|HEMO_MOUSE Hemopexin OS=Mus musculus GN=Hpx PE=1 SV=2	1	13	28.7	51.317	460	0	61.811	24797000	66551	2921600	4888500	7345500	2896700	3.50349	1.34315	-2.16034	3558
P24527	Leukotriene A-4 hydrolase	Lta4h	sp|P24527|LKHA4_MOUSE Leukotriene A-4 hydrolase OS=Mus musculus GN=Lta4h PE=1 SV=4	1	26	51.1	69.05	611	0	257.65	33807000	0	5368000	6164700	8527600	5237000	3.49285	1.81123	-1.68162	908
Q6ZWY8	Thymosin beta-10	Tmsb10	sp|Q6ZWY8|TYB10_MOUSE Thymosin beta-10 OS=Mus musculus GN=Tmsb10 PE=1 SV=3	1	1	31.8	5.0256	44	0	35.239	89337000	0	29400000	13413000	23179000	10299000	3.49236	2.99117	-0.501184	2410
Q9JJA2	Conserved oligomeric Golgi complex subunit 8	Cog8	sp|Q9JJA2|COG8_MOUSE Conserved oligomeric Golgi complex subunit 8 OS=Mus musculus GN=Cog8 PE=1 SV=3	1	24	38.3	71.601	640	0	316.06	139770000	3376100	2089000	29233000	26326000	28283000	3.4828	3.91286	0.430064	4600
G3UW63		Rad51ap2	tr|G3UW63|G3UW63_MOUSE MCG1037962 OS=Mus musculus GN=Rad51ap2 PE=4 SV=1	1	2	2	112.18	976	0.0031118	2.561	8105900	0	707160	1439700	2519000	1658500	3.46937	-0.0275749	-3.49695	396
Q9DCD0	6-phosphogluconate dehydrogenase, decarboxylating	Pgd	sp|Q9DCD0|6PGD_MOUSE 6-phosphogluconate dehydrogenase, decarboxylating OS=Mus musculus GN=Pgd PE=1 SV=3	1	14	36	53.247	483	0	153.63	40819000	72316	7234600	9479300	9880200	4528900	3.46542	2.01909	-1.44633	4457
Q6ZQ12	Ninein-like protein	Ninl	sp|Q6ZQ12|NINL_MOUSE Ninein-like protein OS=Mus musculus GN=Ninl PE=1 SV=3	1	46	34.3	157.84	1394	0	210.74	23082000	199980	1076800	4443100	4981800	4846700	3.44469	1.358	-2.08668	2391
Q8R2E9	ERO1-like protein beta	Ero1lb	sp|Q8R2E9|ERO1B_MOUSE ERO1-like protein beta OS=Mus musculus GN=Ero1b PE=1 SV=1	1	5	13.1	53.517	467	0	28.708	3715100	0	139820	1187700	876070	825520	3.42663	-0.96352	-4.39015	3311
Q02105	Complement C1q subcomponent subunit C	C1qc	sp|Q02105|C1QC_MOUSE Complement C1q subcomponent subunit C OS=Mus musculus GN=C1qc PE=1 SV=2	1	3	15	25.991	246	0	11.316	33698000	490390	1392000	10849000	14583000	3534800	3.40648	2.15204	-1.25444	1523
Q9QXD6;P70695	Fructose-1,6-bisphosphatase 1	Fbp1	sp|Q9QXD6|F16P1_MOUSE Fructose-1,6-bisphosphatase 1 OS=Mus musculus GN=Fbp1 PE=1 SV=3	2	15	53	36.912	338	0	323.31	213980000	439260	35451000	43217000	47259000	29052000	3.3937	4.39513	1.00143	4679
P23591	GDP-L-fucose synthase	Tsta3	sp|P23591|FCL_MOUSE GDP-L-fucose synthase OS=Mus musculus GN=Tsta3 PE=1 SV=3	1	11	40.8	35.877	321	0	136.38	45674000	0	9418200	8238900	10734000	4907200	3.3924	2.03008	-1.36231	900
P56812	Programmed cell death protein 5	Pdcd5	sp|P56812|PDCD5_MOUSE Programmed cell death protein 5 OS=Mus musculus GN=Pdcd5 PE=1 SV=3	1	5	34.9	14.275	126	0	47.176	45608000	85747	9403700	6883900	12195000	8046800	3.37717	2.24288	-1.13429	1188
Q9WV92;Q9Z2H5	Band 4.1-like protein 3;Band 4.1-like protein 3, N-terminally processed	Epb41l3	sp|Q9WV92|E41L3_MOUSE Band 4.1-like protein 3 OS=Mus musculus GN=Epb41l3 PE=1 SV=1	2	39	43.6	103.34	929	0	323.31	43676000	898630	827390	5921500	13378000	7366800	3.36532	2.17252	-1.1928	4846
Q9CYR6	Phosphoacetylglucosamine mutase	Pgm3	sp|Q9CYR6|AGM1_MOUSE Phosphoacetylglucosamine mutase OS=Mus musculus GN=Pgm3 PE=1 SV=1	1	8	17.5	59.452	542	0	20.726	6707200	16277	1141500	1483300	1651200	927690	3.35834	-0.495727	-3.85407	4060
P16015	Carbonic anhydrase 3	Ca3	sp|P16015|CAH3_MOUSE Carbonic anhydrase 3 OS=Mus musculus GN=Ca3 PE=1 SV=3	1	13	69.2	29.366	260	0	108.93	124020000	482510	22268000	24705000	51093000	24340000	3.34486	4.07861	0.733745	834
P21614	Vitamin D-binding protein	Gc	sp|P21614|VTDB_MOUSE Vitamin D-binding protein OS=Mus musculus GN=Gc PE=1 SV=2	1	9	20.4	53.6	476	0	16.935	16124000	29994	3280900	4183700	3162500	2015800	3.34022	0.688658	-2.65157	884
Q9D7X8	Gamma-glutamylcyclotransferase	Ggct	sp|Q9D7X8|GGCT_MOUSE Gamma-glutamylcyclotransferase OS=Mus musculus GN=Ggct PE=1 SV=1	1	4	21.3	21.166	188	0	15.269	15147000	0	3515300	2581900	3675400	1988600	3.33826	0.522288	-2.81598	4276
Q9JLQ0	CD2-associated protein	Cd2ap	sp|Q9JLQ0|CD2AP_MOUSE CD2-associated protein OS=Mus musculus GN=Cd2ap PE=1 SV=3	1	20	37.8	70.449	637	0	47.674	20541000	597280	423130	3750800	8320800	3271300	3.30538	1.33419	-1.9712	4644
P30115	Glutathione S-transferase A3	Gsta3	sp|P30115|GSTA3_MOUSE Glutathione S-transferase A3 OS=Mus musculus GN=Gsta3 PE=1 SV=2	1	7	22.2	25.36	221	0	63.61	118240000	266900	20289000	23676000	30015000	14186000	3.30323	3.54271	0.239478	958
P11404	Fatty acid-binding protein, heart	Fabp3	sp|P11404|FABPH_MOUSE Fatty acid-binding protein, heart OS=Mus musculus GN=Fabp3 PE=1 SV=5	1	8	60.2	14.819	133	0	179.26	726490000	1102500	171430000	123390000	186080000	89527000	3.29786	6.09996	2.80211	793
O70250	Phosphoglycerate mutase 2	Pgam2	sp|O70250|PGAM2_MOUSE Phosphoglycerate mutase 2 OS=Mus musculus GN=Pgam2 PE=1 SV=3	1	14	56.5	28.827	253	0	214.15	492260000	913130	115540000	90883000	131060000	70686000	3.28917	5.67072	2.38155	598
P07759;P29621;Q91WP6;Q5I2A0;Q80X76	Serine protease inhibitor A3K	Serpina3k	sp|P07759|SPA3K_MOUSE Serine protease inhibitor A3K OS=Mus musculus GN=Serpina3k PE=1 SV=2	5	13	32.5	46.879	418	0	211.47	114400000	200410	20849000	27840000	19766000	11089000	3.24884	3.30129	0.0524454	745
E0CZ26		Kctd18	tr|E0CZ26|E0CZ26_MOUSE Potassium channel tetramerisation domain containing 18, isoform CRA_a OS=Mus musculus GN=Kctd18 PE=1 SV=1	1	9	31.7	46.973	429	0	65.526	26431000	550000	879360	5168800	6217000	7154400	3.22756	1.72455	-1.50301	271
Q9R1T4	Septin-6	Septin-6	sp|Q9R1T4|SEPT6_MOUSE Septin-6 OS=Mus musculus GN=Sept6 PE=1 SV=4	1	8	22.4	49.619	434	0	21.808	5348500	203650	0	1414900	1713000	1269500	3.21107	-0.349912	-3.56098	4788
Q3UA37	Glutamine-rich protein 1	Qrich1	sp|Q3UA37|QRIC1_MOUSE Glutamine-rich protein 1 OS=Mus musculus GN=Qrich1 PE=1 SV=1	1	2	2.7	86.555	777	0.003107	2.5501	610290	24638	11377	246650	118290	104800	3.20452	-3.67486	-6.87937	1706
P54726	UV excision repair protein RAD23 homolog A	Rad23a	sp|P54726|RD23A_MOUSE UV excision repair protein RAD23 homolog A OS=Mus musculus GN=Rad23a PE=1 SV=2	1	7	16	39.706	363	0	6.9068	8520900	0	892570	1705100	2058100	1687700	3.19359	-0.0349983	-3.22859	1160
Q9Z160	Conserved oligomeric Golgi complex subunit 1	Cog1	sp|Q9Z160|COG1_MOUSE Conserved oligomeric Golgi complex subunit 1 OS=Mus musculus GN=Cog1 PE=1 SV=3	1	42	46.6	109.05	980	0	323.31	167880000	5539600	3019400	35870000	32835000	35986000	3.18034	4.23334	1.053	4889
P15327	Bisphosphoglycerate mutase	Bpgm	sp|P15327|PMGE_MOUSE Bisphosphoglycerate mutase OS=Mus musculus GN=Bpgm PE=1 SV=2	1	7	37.5	29.978	259	0	24.995	19563000	0	4467700	3586400	4762500	2903500	3.1632	0.986943	-2.17626	830
Q9R0P9	Ubiquitin carboxyl-terminal hydrolase isozyme L1	Uchl1	sp|Q9R0P9|UCHL1_MOUSE Ubiquitin carboxyl-terminal hydrolase isozyme L1 OS=Mus musculus GN=Uchl1 PE=1 SV=1	1	9	45.7	24.838	223	0	291.85	254560000	575590	53421000	45926000	73997000	29530000	3.15564	4.64784	1.4922	4768
Q9CVD2	Ataxin-3	Atxn3	sp|Q9CVD2|ATX3_MOUSE Ataxin-3 OS=Mus musculus GN=Atxn3 PE=1 SV=2	1	5	15.5	40.533	355	0	6.8771	2942600	198880	0	694260	1139100	615490	3.1476	-1.23666	-4.38426	3984
Q921L5;REV__Q6PDS3	Conserved oligomeric Golgi complex subunit 2	Cog2	sp|Q921L5|COG2_MOUSE Conserved oligomeric Golgi complex subunit 2 OS=Mus musculus GN=Cog2 PE=1 SV=2	2	35	56.9	82.039	731	0	323.31	139020000	4658800	2573000	29743000	26306000	30452000	3.14366	3.95635	0.812684	3633
Q8VC28;Q9JLI0	Aldo-keto reductase family 1 member C13	Akr1c13;Akr1c12	sp|Q8VC28|AK1CD_MOUSE Aldo-keto reductase family 1 member C13 OS=Mus musculus GN=Akr1c13 PE=1 SV=2;tr|Q9JLI0|Q9JLI0_MOUSE Aldo-keto reductase a OS=Mus musculus GN=Akr1c12 PE=1 SV=1	2	6	21.1	37.057	323	0	10.02	7785900	59463	600840	2117800	2490900	703060	3.12234	-0.26009	-3.38243	3376
Q3UMF0	Cordon-bleu protein-like 1	Cobll1	sp|Q3UMF0|COBL1_MOUSE Cordon-bleu protein-like 1 OS=Mus musculus GN=Cobll1 PE=1 SV=2	1	18	18.6	137.38	1273	0	31.764	5286500	139520	142640	2381100	1957300	325220	3.11411	-0.690414	-3.80452	1761
P45376	Aldose reductase	Akr1b1	sp|P45376|ALDR_MOUSE Aldose reductase OS=Mus musculus GN=Akr1b1 PE=1 SV=3	1	17	55.1	35.732	316	0	217.55	528000000	2027400	77784000	117630000	124550000	69774000	3.09253	5.76403	2.6715	1040
O35625	Axin-1	Axin1	sp|O35625|AXIN1_MOUSE Axin-1 OS=Mus musculus GN=Axin1 PE=1 SV=3	1	5	7.2	96.275	863	0	7.8475	1265500	31249	41842	166480	443850	317270	3.0732	-2.69529	-5.7685	523
Q9JJU8	SH3 domain-binding glutamic acid-rich-like protein	Sh3bgrl	sp|Q9JJU8|SH3L1_MOUSE SH3 domain-binding glutamic acid-rich-like protein OS=Mus musculus GN=Sh3bgrl PE=1 SV=1	1	2	20.2	12.811	114	0	11.889	11153000	0	3269700	1612900	2867100	1495400	3.06802	0.0395193	-3.0285	4610
P42208	Septin-2	Septin-2	sp|P42208|SEPT2_MOUSE Septin-2 OS=Mus musculus GN=Sept2 PE=1 SV=2	1	17	58.2	41.525	361	0	323.31	249220000	6159000	9682200	52495000	81040000	52618000	3.06365	5.03364	1.96999	1026
Q9CWJ9	Bifunctional purine biosynthesis protein PURH;Phosphoribosylaminoimidazolecarboxamide formyltransferase;IMP cyclohydrolase	Atic	sp|Q9CWJ9|PUR9_MOUSE Bifunctional purine biosynthesis protein PURH OS=Mus musculus GN=Atic PE=1 SV=2	1	14	31.4	64.217	592	0	30.89	9958400	0	1524400	2063500	2582800	1201700	3.05483	0.00262801	-3.0522	3994
Q9D2X0	Ankyrin repeat domain-containing protein 39	Ankrd39	sp|Q9D2X0|ANR39_MOUSE Ankyrin repeat domain-containing protein 39 OS=Mus musculus GN=Ankrd39 PE=1 SV=1	1	1	10.9	19.639	183	0.0051425	2.1943	1744400	0	0	303590	603340	295850	3.04893	-2.29235	-5.34127	4170
P70296	Phosphatidylethanolamine-binding protein 1;Hippocampal cholinergic neurostimulating peptide	Pebp1	sp|P70296|PEBP1_MOUSE Phosphatidylethanolamine-binding protein 1 OS=Mus musculus GN=Pebp1 PE=1 SV=3	1	15	93.6	20.83	187	0	323.31	1753300000	5186600	375480000	341680000	493810000	238720000	3.04608	7.53076	4.48467	1395
P01592	Immunoglobulin J chain	Igj	sp|P01592|IGJ_MOUSE Immunoglobulin J chain OS=Mus musculus GN=Jchain PE=1 SV=4	1	3	21.4	18.013	159	0	19.093	19594000	4166400	0	1034200	6380000	6610800	3.03558	0.925225	-2.11035	696
Q8R1U1	Conserved oligomeric Golgi complex subunit 4	Cog4	sp|Q8R1U1|COG4_MOUSE Conserved oligomeric Golgi complex subunit 4 OS=Mus musculus GN=Cog4 PE=1 SV=1	1	33	49.6	88.66	785	0	323.31	188840000	6212600	4019000	41360000	36822000	37261000	3.03168	4.37368	1.342	3307
O88958	Glucosamine-6-phosphate isomerase 1	Gnpda1	sp|O88958|GNPI1_MOUSE Glucosamine-6-phosphate isomerase 1 OS=Mus musculus GN=Gnpda1 PE=1 SV=3	1	11	54.7	32.549	289	0	80.448	45121000	130560	8909800	8900300	12099000	5275900	3.02955	2.15962	-0.869931	677
Q9R0P3	S-formylglutathione hydrolase	Esd	sp|Q9R0P3|ESTD_MOUSE S-formylglutathione hydrolase OS=Mus musculus GN=Esd PE=1 SV=1	1	6	23.8	31.319	282	0	17.831	23705000	0	3849500	5130800	7010100	2294100	3.02921	1.23177	-1.79744	4764
O88342	WD repeat-containing protein 1	Wdr1	sp|O88342|WDR1_MOUSE WD repeat-containing protein 1 OS=Mus musculus GN=Wdr1 PE=1 SV=3	1	12	22.9	66.406	606	0	32.094	9278800	0	1378700	1930900	2121900	1006700	3.0259	-0.208986	-3.23489	630
P97429	Annexin A4	Anxa4	sp|P97429|ANXA4_MOUSE Annexin A4 OS=Mus musculus GN=Anxa4 PE=1 SV=4	1	5	18.5	35.915	319	0	13.479	2943100	20704	294010	678920	975300	308980	3.00556	-1.65347	-4.65903	1468
P09411	Phosphoglycerate kinase 1	Pgk1	sp|P09411|PGK1_MOUSE Phosphoglycerate kinase 1 OS=Mus musculus GN=Pgk1 PE=1 SV=4	1	12	35.3	44.55	417	0	30.4	4597100	0	185330	1838700	1684800	254800	3.00042	-1.00417	-4.00459	763
Q8C1Z8	tRNA methyltransferase 10 homolog A	Trmt10a	sp|Q8C1Z8|TM10A_MOUSE tRNA methyltransferase 10 homolog A OS=Mus musculus GN=Trmt10a PE=2 SV=2	1	4	15.9	37.965	328	0.00028145	6.2815	4531500	0	355370	1523200	1564800	333600	2.99075	-1.00065	-3.99139	2946
Q91V64	Isochorismatase domain-containing protein 1	Isoc1	sp|Q91V64|ISOC1_MOUSE Isochorismatase domain-containing protein 1 OS=Mus musculus GN=Isoc1 PE=1 SV=1	1	5	23.2	32.032	297	0	32.218	5423100	33956	646260	1145100	1943200	562590	2.95164	-0.782386	-3.73402	3490
Q8C0L8	Conserved oligomeric Golgi complex subunit 5	Cog5	sp|Q8C0L8|COG5_MOUSE Conserved oligomeric Golgi complex subunit 5 OS=Mus musculus GN=Cog5 PE=1 SV=3	1	37	47.6	91.39	829	0	323.31	173910000	6343100	3631000	36631000	33341000	34739000	2.95007	4.23383	1.28376	2920
Q91W67	Ubiquitin-like protein 7	Ubl7	sp|Q91W67|UBL7_MOUSE Ubiquitin-like protein 7 OS=Mus musculus GN=Ubl7 PE=1 SV=2	1	6	20.8	40.433	380	0	20.264	8570800	312470	0	2623400	1936700	1595900	2.94113	0.116062	-2.82507	3523
Q8R4U7	Leucine zipper protein 1	Luzp1	sp|Q8R4U7|LUZP1_MOUSE Leucine zipper protein 1 OS=Mus musculus GN=Luzp1 PE=1 SV=2	1	27	29.2	119.31	1068	0	48.819	9454900	256970	524830	2565700	3026800	2363100	2.93309	0.508868	-2.42422	3355
Q64362	AKT-interacting protein	Aktip	sp|Q64362|AKTIP_MOUSE AKT-interacting protein OS=Mus musculus GN=Aktip PE=1 SV=1	1	12	52.1	32.941	292	0	88.817	52421000	1363800	1888400	11107000	11706000	11729000	2.93108	2.63445	-0.296622	2145
Q8CI04;REV__D3Z752	Conserved oligomeric Golgi complex subunit 3	Cog3	sp|Q8CI04|COG3_MOUSE Conserved oligomeric Golgi complex subunit 3 OS=Mus musculus GN=Cog3 PE=1 SV=3	2	38	49.9	93.282	820	0	323.31	125840000	4149500	2688000	25415000	20110000	26715000	2.92789	3.6886	0.760715	3112
Q8BHG2	UPF0587 protein C1orf123 homolog		sp|Q8BHG2|CA123_MOUSE UPF0587 protein C1orf123 homolog OS=Mus musculus PE=1 SV=1	1	5	38.1	18.02	160	0	10.415	15270000	0	3087400	3692600	4265700	1451100	2.9236	0.614448	-2.30915	2695
P54728	UV excision repair protein RAD23 homolog B	Rad23b	sp|P54728|RD23B_MOUSE UV excision repair protein RAD23 homolog B OS=Mus musculus GN=Rad23b PE=1 SV=2	1	10	19	43.512	416	0	15.684	28179000	132480	5036200	5981100	7740000	4264000	2.92217	1.65124	-1.27093	1161
Q8BGR9	Ubiquitin-like domain-containing CTD phosphatase 1	Ublcp1	sp|Q8BGR9|UBCP1_MOUSE Ubiquitin-like domain-containing CTD phosphatase 1 OS=Mus musculus GN=Ublcp1 PE=1 SV=1	1	6	15.4	36.836	318	0	8.4772	5455000	0	239270	1615600	2000600	125290	2.92196	-1.32513	-4.24709	2664
P00015	Cytochrome c, testis-specific	Cyct	sp|P00015|CYC2_MOUSE Cytochrome c, testis-specific OS=Mus musculus GN=Cyct PE=1 SV=3	1	4	31.4	11.713	105	0	8.1036	17063000	0	4254700	1338600	6595400	2997600	2.91262	0.684923	-2.2277	687
Q9CYA0	Cysteine-rich with EGF-like domain protein 2	Creld2	sp|Q9CYA0|CREL2_MOUSE Cysteine-rich with EGF-like domain protein 2 OS=Mus musculus GN=Creld2 PE=1 SV=1	1	7	15.4	38.219	350	0	9.3257	6340800	0	474120	1891700	1571900	857500	2.90362	-0.440274	-3.34389	4051
Q3V2J9		Wfdc10	tr|Q3V2J9|Q3V2J9_MOUSE Protein Wfdc10 OS=Mus musculus GN=Wfdc10 PE=2 SV=1	1	1	8.1	13.627	124	0.0097652	1.9091	7439700	0	0	0	5558000	1881700	2.87243	-1.5831	-4.45553	1821
Q91VW3	SH3 domain-binding glutamic acid-rich-like protein 3	Sh3bgrl3	sp|Q91VW3|SH3L3_MOUSE SH3 domain-binding glutamic acid-rich-like protein 3 OS=Mus musculus GN=Sh3bgrl3 PE=1 SV=1	1	2	31.2	10.477	93	0.000501	4.1927	11106000	0	775490	551290	3331400	823580	2.86972	-0.69141	-3.56113	3511
Q8VCT3	Aminopeptidase B	Rnpep	sp|Q8VCT3|AMPB_MOUSE Aminopeptidase B OS=Mus musculus GN=Rnpep PE=1 SV=2	1	6	12.6	72.415	650	0	9.7137	3733100	0	223920	1048200	1208700	524700	2.86837	-1.08676	-3.95513	3401
Q8BTY1	Kynurenine--oxoglutarate transaminase 1	Ccbl1	sp|Q8BTY1|KAT1_MOUSE Kynurenine--oxoglutarate transaminase 1 OS=Mus musculus GN=Ccbl1 PE=1 SV=1	1	5	14.6	47.563	424	0	22.709	6286000	29137	1149700	1707600	1291200	892160	2.86384	-0.565055	-3.42889	2827
Q9JI44	DNA methyltransferase 1-associated protein 1	Dmap1	sp|Q9JI44|DMAP1_MOUSE DNA methyltransferase 1-associated protein 1 OS=Mus musculus GN=Dmap1 PE=1 SV=1	1	2	6.6	53.129	468	0.00027793	5.9764	1600900	80881	50359	393160	537550	388140	2.85588	-2.09297	-4.94885	4575
P48036	Annexin A5	Anxa5	sp|P48036|ANXA5_MOUSE Annexin A5 OS=Mus musculus GN=Anxa5 PE=1 SV=1	1	16	51.7	35.752	319	0	170.41	73553000	352920	12821000	16017000	20894000	8990800	2.85135	2.96126	0.109904	1079
Q91ZF0	DnaJ homolog subfamily C member 24	Dnajc24	sp|Q91ZF0|DJC24_MOUSE DnaJ homolog subfamily C member 24 OS=Mus musculus GN=Dnajc24 PE=1 SV=3	1	3	14.3	22.08	196	0.0027057	2.705	2882900	0	151140	394540	1189600	535890	2.83871	-1.55416	-4.39288	3602
Q99K85	Phosphoserine aminotransferase	Psat1	sp|Q99K85|SERC_MOUSE Phosphoserine aminotransferase OS=Mus musculus GN=Psat1 PE=1 SV=1	1	11	32.2	40.472	370	0	36.703	12354000	0	2488300	2872500	3061400	1408900	2.83259	0.319948	-2.51264	3730
Q62384	Zinc finger protein ZPR1	Zpr1	sp|Q62384|ZPR1_MOUSE Zinc finger protein ZPR1 OS=Mus musculus GN=Zpr1 PE=1 SV=1	1	6	16.3	50.714	459	0	11.964	1720300	29856	113850	474460	509020	239220	2.81778	-2.26155	-5.07934	2103
O55131	Septin-7	Septin-7	sp|O55131|SEPT7_MOUSE Septin-7 OS=Mus musculus GN=Sept7 PE=1 SV=1	1	17	40.6	50.549	436	0	248.43	168240000	5129900	7915400	35884000	55171000	37896000	2.81518	4.50795	1.69278	581
P40142	Transketolase	Tkt	sp|P40142|TKT_MOUSE Transketolase OS=Mus musculus GN=Tkt PE=1 SV=1	1	26	45.7	67.63	623	0	233.79	106410000	394610	18034000	21289000	24420000	10376000	2.80544	3.24199	0.436553	1019
Q9D7I5	Phospholysine phosphohistidine inorganic pyrophosphate phosphatase	Lhpp	sp|Q9D7I5|LHPP_MOUSE Phospholysine phosphohistidine inorganic pyrophosphate phosphatase OS=Mus musculus GN=Lhpp PE=1 SV=1	1	1	4.8	29.144	270	0.0030898	2.4891	971650	0	0	379780	387870	204010	2.80434	-2.57588	-5.38021	4267
P28667	MARCKS-related protein	Marcksl1	sp|P28667|MRP_MOUSE MARCKS-related protein OS=Mus musculus GN=Marcksl1 PE=1 SV=2	1	2	11	20.165	200	0.0018566	3.003	3085700	0	149430	744390	473890	1604600	2.80352	-1.16408	-3.9676	947
Q8BVI4	Dihydropteridine reductase	Qdpr	sp|Q8BVI4|DHPR_MOUSE Dihydropteridine reductase OS=Mus musculus GN=Qdpr PE=1 SV=2	1	4	25.3	25.57	241	0	14.127	21578000	0	4594800	3351600	6026800	2794300	2.78992	1.04917	-1.74076	2846
Q8VIN1	Phosphatidylethanolamine-binding protein 2	Pbp2	sp|Q8VIN1|PEBP2_MOUSE Phosphatidylethanolamine-binding protein 2 OS=Mus musculus GN=Pbp2 PE=1 SV=1	1	7	57.2	21.191	187	0	101.26	62066000	219460	12589000	8717000	15952000	9057600	2.78843	2.54247	-0.245959	3483
E9PZF0;Q01768	Nucleoside diphosphate kinase;Nucleoside diphosphate kinase B	Gm20390;Nme2	tr|E9PZF0|E9PZF0_MOUSE Nucleoside diphosphate kinase OS=Mus musculus GN=Gm20390 PE=3 SV=1;sp|Q01768|NDKB_MOUSE Nucleoside diphosphate kinase B OS=Mus musculus GN=Nme2 PE=1 SV=1	2	17	73	30.2	267	0	294.81	476660000	1709100	107360000	79741000	129950000	64966000	2.7824	5.56315	2.78075	299
Q62048	Astrocytic phosphoprotein PEA-15	Pea15	sp|Q62048|PEA15_MOUSE Astrocytic phosphoprotein PEA-15 OS=Mus musculus GN=Pea15 PE=1 SV=1	1	2	16.9	15.054	130	0.00049913	4.1141	7458800	0	912180	751590	3194200	962830	2.77813	-0.487466	-3.26559	2072
P15532	Nucleoside diphosphate kinase A	Nme1	sp|P15532|NDKA_MOUSE Nucleoside diphosphate kinase A OS=Mus musculus GN=Nme1 PE=1 SV=1	1	14	77.6	17.208	152	0	18.421	11231000	80502	1136200	1253200	3852300	1532100	2.7762	0.0718749	-2.70433	831
P32261;CON__P41361	Antithrombin-III	Serpinc1	sp|P32261|ANT3_MOUSE Antithrombin-III OS=Mus musculus GN=Serpinc1 PE=1 SV=1	2	10	22.4	52.003	465	0	18.03	6822800	0	1253300	1634300	1685800	861140	2.75114	-0.474932	-3.22607	974
P06797	Cathepsin L1;Cathepsin L1 heavy chain;Cathepsin L1 light chain	Ctsl	sp|P06797|CATL1_MOUSE Cathepsin L1 OS=Mus musculus GN=Ctsl PE=1 SV=2	1	3	12.6	37.547	334	0.00026392	5.0486	2767000	83207	119420	477950	952120	537790	2.73822	-1.56732	-4.30554	737
Q99KP3	Lambda-crystallin homolog	Cryl1	sp|Q99KP3|CRYL1_MOUSE Lambda-crystallin homolog OS=Mus musculus GN=Cryl1 PE=1 SV=3	1	4	15	35.208	319	0.00049788	4.0958	1889400	0	210600	311490	663010	203500	2.72525	-2.41459	-5.13984	3745
Q9DCF9	Translocon-associated protein subunit gamma	Ssr3	sp|Q9DCF9|SSRG_MOUSE Translocon-associated protein subunit gamma OS=Mus musculus GN=Ssr3 PE=1 SV=1	1	1	7.6	21.064	185	0	43.474	6715500	0	0	4033400	0	2682100	2.71041	-1.53831	-4.24873	4461
Q3UGR5	Haloacid dehalogenase-like hydrolase domain-containing protein 2	Hdhd2	sp|Q3UGR5|HDHD2_MOUSE Haloacid dehalogenase-like hydrolase domain-containing protein 2 OS=Mus musculus GN=Hdhd2 PE=1 SV=2	1	4	12.4	28.73	259	0.00028169	6.3005	13297000	62855	2479300	3482600	3278600	1255100	2.70991	0.389941	-2.31997	1725
P70303	CTP synthase 2	Ctps2	sp|P70303|PYRG2_MOUSE CTP synthase 2 OS=Mus musculus GN=Ctps2 PE=1 SV=1	1	5	9.9	65.514	586	0.0027291	2.7743	1050000	0	33152	235980	349270	172050	2.69339	-2.93706	-5.63045	1397
Q9CYL5	Golgi-associated plant pathogenesis-related protein 1	Glipr2	sp|Q9CYL5|GAPR1_MOUSE Golgi-associated plant pathogenesis-related protein 1 OS=Mus musculus GN=Glipr2 PE=1 SV=3	1	2	16.9	17.09	154	0.0091781	1.9371	1512000	218470	0	111720	652320	529480	2.68355	-2.45565	-5.1392	4058
Q61598	Rab GDP dissociation inhibitor beta	Gdi2	sp|Q61598|GDIB_MOUSE Rab GDP dissociation inhibitor beta OS=Mus musculus GN=Gdi2 PE=1 SV=1	1	14	40.4	50.537	445	0	46.55	24990000	166190	4238100	5285600	6670900	3684000	2.68186	1.45	-1.23186	2044
P47791	Glutathione reductase, mitochondrial	Gsr	sp|P47791|GSHR_MOUSE Glutathione reductase, mitochondrial OS=Mus musculus GN=Gsr PE=1 SV=3	1	6	14.4	53.662	500	0	14.281	9771400	62785	1638600	2286500	2271200	1349300	2.66537	0.0458612	-2.61951	1066
P05201	Aspartate aminotransferase, cytoplasmic	Got1	sp|P05201|AATC_MOUSE Aspartate aminotransferase, cytoplasmic OS=Mus musculus GN=Got1 PE=1 SV=3	1	12	36.8	46.247	413	0	33.94	10162000	0	1831500	2121200	1865100	1577800	2.66389	-0.00972462	-2.67361	729
Q00915	Retinol-binding protein 1	Rbp1	sp|Q00915|RET1_MOUSE Retinol-binding protein 1 OS=Mus musculus GN=Rbp1 PE=1 SV=2	1	7	54.1	15.846	135	0	11.046	16035000	0	4550400	2342200	4028100	2467100	2.65945	0.623186	-2.03627	1514
P60840	Alpha-endosulfine	Ensa	sp|P60840|ENSA_MOUSE Alpha-endosulfine OS=Mus musculus GN=Ensa PE=1 SV=1	1	2	23.1	13.335	121	0	6.9931	5415500	0	768890	990120	1719300	1423800	2.65777	-0.46466	-3.12242	1236
Q9JKP7	DNA polymerase epsilon subunit 3	Pole3	sp|Q9JKP7|DPOE3_MOUSE DNA polymerase epsilon subunit 3 OS=Mus musculus GN=Pole3 PE=1 SV=1	1	1	7.6	16.629	145	0.0081984	1.9893	7707100	2590500	0	1113800	1403800	1963100	2.65182	-0.351087	-3.0029	4630
Q61206	Platelet-activating factor acetylhydrolase IB subunit beta	Pafah1b2	sp|Q61206|PA1B2_MOUSE Platelet-activating factor acetylhydrolase IB subunit beta OS=Mus musculus GN=Pafah1b2 PE=1 SV=2	1	5	29.3	25.581	229	0	137.07	103040000	897050	14008000	24452000	31063000	12078000	2.65067	3.49736	0.846699	2010
Q8K4Z3	NAD(P)H-hydrate epimerase	Apoa1bp	sp|Q8K4Z3|NNRE_MOUSE NAD(P)H-hydrate epimerase OS=Mus musculus GN=Apoa1bp PE=1 SV=1	1	3	13.5	30.972	282	0	45.945	29476000	96207	7636000	5243500	7500600	3248100	2.64344	1.44197	-1.20147	3260
P18242	Cathepsin D	Ctsd	sp|P18242|CATD_MOUSE Cathepsin D OS=Mus musculus GN=Ctsd PE=1 SV=1	1	2	6.8	44.953	410	0.0023036	2.9022	1842700	53969	85243	276780	490900	457020	2.63416	-2.22686	-4.86102	858
Q3UX62	Coiled-coil domain-containing protein 114	Ccdc114	sp|Q3UX62|CC114_MOUSE Coiled-coil domain-containing protein 114 OS=Mus musculus GN=Ccdc114 PE=2 SV=1	1	3	3.5	74.119	658	0.0005184	4.714	3020500	51226	261510	399850	1011100	759320	2.63171	-1.45833	-4.09004	1790
A0A0G2JFZ3			tr|A0A0G2JFZ3|A0A0G2JFZ3_MOUSE Protein Igkv19-93 (Fragment) OS=Mus musculus GN=Igkv19-93 PE=1 SV=3	1	1	13.8	12.889	116	0.00026961	5.4447	4874100	782170	0	907950	2435800	748160	2.62904	-0.648241	-3.27728	39
Q3UDP0	WD repeat-containing protein 41	Wdr41	sp|Q3UDP0|WDR41_MOUSE WD repeat-containing protein 41 OS=Mus musculus GN=Wdr41 PE=1 SV=1	1	2	5.2	51.51	460	0.004721	2.2047	1143400	0	0	491820	347770	212570	2.62781	-2.48427	-5.11208	1712
Q9R0X5	X-linked retinitis pigmentosa GTPase regulator	Rpgr	sp|Q9R0X5|RPGR_MOUSE X-linked retinitis pigmentosa GTPase regulator OS=Mus musculus GN=Rpgr PE=1 SV=2	1	4	4.7	111.8	1001	0.00094787	3.2988	1651500	39235	108870	593410	619330	147060	2.62092	-2.29362	-4.91454	4775
Q91V76	Ester hydrolase C11orf54 homolog		sp|Q91V76|CK054_MOUSE Ester hydrolase C11orf54 homolog OS=Mus musculus PE=1 SV=1	1	8	26	34.995	315	0	15.005	11837000	98453	1606300	2812400	2355900	1828800	2.61861	0.309251	-2.30936	3491
P45377	Aldose reductase-related protein 2	Akr1b8	sp|P45377|ALD2_MOUSE Aldose reductase-related protein 2 OS=Mus musculus GN=Akr1b8 PE=1 SV=2	1	13	44.6	36.12	316	0	107.88	116830000	1020800	16730000	25771000	30706000	17174000	2.61834	3.68635	1.06801	1041
P26041	Moesin	Msn	sp|P26041|MOES_MOUSE Moesin OS=Mus musculus GN=Msn PE=1 SV=3	1	12	19.4	67.766	577	0	7.6149	1836200	19378	231040	407710	566940	245680	2.6108	-2.26983	-4.88063	918
Q80W21	Glutathione S-transferase Mu 7	Gstm7	sp|Q80W21|GSTM7_MOUSE Glutathione S-transferase Mu 7 OS=Mus musculus GN=Gstm7 PE=1 SV=1	1	15	65.6	25.709	218	0	33.535	18968000	99174	3757200	3731600	5291100	2141500	2.60139	0.910254	-1.69114	2548
Q9D9X8	Sperm acrosome membrane-associated protein 3;Sperm acrosome membrane-associated protein 3, membrane form;Sperm acrosome membrane-associated protein 3, processed form	Spaca3	sp|Q9D9X8|SACA3_MOUSE Sperm acrosome membrane-associated protein 3 OS=Mus musculus GN=Spaca3 PE=1 SV=2	1	2	11.8	25.019	221	0.0031035	2.544	4965400	0	1170000	938360	1496100	595200	2.59174	-0.976785	-3.56852	4349
P54822	Adenylosuccinate lyase	Adsl	sp|P54822|PUR8_MOUSE Adenylosuccinate lyase OS=Mus musculus GN=Adsl PE=1 SV=2	1	8	21.1	54.866	484	0	32.002	12928000	47623	3341900	2676300	2874300	1486300	2.5861	0.281318	-2.30479	1166
Q9CWR1	WD repeat-containing protein 73	Wdr73	sp|Q9CWR1|WDR73_MOUSE WD repeat-containing protein 73 OS=Mus musculus GN=Wdr73 PE=1 SV=1	1	2	7.5	40.856	371	0.00026882	5.3881	1185300	0	0	320500	407810	59324	2.58375	-3.22737	-5.81112	4001
Q6Q477;G5E829;Q0VF55;Q9R0K7	Calcium-transporting ATPase	Atp2b4	sp|Q6Q477|AT2B4_MOUSE Plasma membrane calcium-transporting ATPase 4 OS=Mus musculus GN=Atp2b4 PE=1 SV=1	4	7	7.5	133.07	1205	0	12.567	2742300	728580	10744	541600	365870	612350	2.57291	-1.9047	-4.4776	2355
Q07231	Zinc finger and SCAN domain-containing protein 21	Zscan21	sp|Q07231|ZSC21_MOUSE Zinc finger and SCAN domain-containing protein 21 OS=Mus musculus GN=Zscan21 PE=2 SV=2	1	9	18.2	63.012	555	0	15.313	5000000	144170	281670	911140	1686500	931210	2.57197	-0.718089	-3.29006	1560
Q91Z53	Glyoxylate reductase/hydroxypyruvate reductase	Grhpr	sp|Q91Z53|GRHPR_MOUSE Glyoxylate reductase/hydroxypyruvate reductase OS=Mus musculus GN=Grhpr PE=1 SV=1	1	4	14.6	35.328	328	0	8.7365	9905500	75325	1629600	2036900	2798400	1310300	2.56868	0.0765505	-2.49213	3600
P55821	Stathmin-2	Stmn2	sp|P55821|STMN2_MOUSE Stathmin-2 OS=Mus musculus GN=Stmn2 PE=1 SV=1	1	3	11.2	20.828	179	0.00027647	5.8741	19325000	145100	1687100	2060800	5425200	1843800	2.55897	0.56478	-1.99419	1174
P53808	Phosphatidylcholine transfer protein	Pctp	sp|P53808|PPCT_MOUSE Phosphatidylcholine transfer protein OS=Mus musculus GN=Pctp PE=1 SV=2	1	1	5.6	24.785	214	0.00073153	3.7483	2660800	256800	0	443060	904320	577270	2.552	-1.59447	-4.14648	1148
Q80X95	Ras-related GTP-binding protein A	Rraga	sp|Q80X95|RRAGA_MOUSE Ras-related GTP-binding protein A OS=Mus musculus GN=Rraga PE=1 SV=1	1	4	13.7	36.566	313	0	8.6745	3697900	511990	0	631050	1115500	714720	2.54091	-1.22075	-3.76167	2571
Q9CZ44	NSFL1 cofactor p47	Nsfl1c	sp|Q9CZ44|NSF1C_MOUSE NSFL1 cofactor p47 OS=Mus musculus GN=Nsfl1c PE=1 SV=1	1	18	58.9	40.709	370	0	265.93	88926000	664170	14934000	19608000	19978000	12453000	2.51758	3.19364	0.676056	4068
P56212	cAMP-regulated phosphoprotein 19	Arpp19	sp|P56212|ARP19_MOUSE cAMP-regulated phosphoprotein 19 OS=Mus musculus GN=Arpp19 PE=1 SV=2	1	2	33	12.293	112	0.0039147	2.3374	3947300	0	1217300	679620	1090100	960180	2.51191	-1.0542	-3.5661	1177
O54784	Death-associated protein kinase 3	Dapk3	sp|O54784|DAPK3_MOUSE Death-associated protein kinase 3 OS=Mus musculus GN=Dapk3 PE=1 SV=1	1	3	7.8	51.421	448	0.00026969	5.4572	1548400	28532	166230	431640	338850	325410	2.48427	-2.35476	-4.83903	548
Q9CPV4	Glyoxalase domain-containing protein 4	Glod4	sp|Q9CPV4|GLOD4_MOUSE Glyoxalase domain-containing protein 4 OS=Mus musculus GN=Glod4 PE=1 SV=1	1	12	47.7	33.316	298	0	64.453	21286000	221990	2666300	4273300	6330600	2442900	2.48234	1.12502	-1.35732	3851
Q61247	Alpha-2-antiplasmin	Serpinf2	sp|Q61247|A2AP_MOUSE Alpha-2-antiplasmin OS=Mus musculus GN=Serpinf2 PE=1 SV=1	1	5	12	54.971	491	0	6.6634	3964900	34558	608940	900940	735760	663070	2.47853	-1.28573	-3.76425	2018
Q8CJ19	Protein-methionine sulfoxide oxidase MICAL3	Mical3	sp|Q8CJ19|MICA3_MOUSE Protein-methionine sulfoxide oxidase MICAL3 OS=Mus musculus GN=Mical3 PE=1 SV=2	1	14	8.7	223.72	1993	0	18.54	1599900	43950	60304	230360	417340	200290	2.46888	-2.78993	-5.25882	3135
Q3UM29	Conserved oligomeric Golgi complex subunit 7	Cog7	sp|Q3UM29|COG7_MOUSE Conserved oligomeric Golgi complex subunit 7 OS=Mus musculus GN=Cog7 PE=1 SV=1	1	31	41.9	86.072	770	0	323.31	169210000	9948900	4504600	37682000	32710000	33849000	2.46181	4.22576	1.76395	1758
Q8C5N5	Programmed cell death protein 2-like	Pdcd2l	sp|Q8C5N5|PDD2L_MOUSE Programmed cell death protein 2-like OS=Mus musculus GN=Pdcd2l PE=1 SV=1	1	1	3.3	39.955	364	0.00027382	5.6987	5027700	872430	0	969130	1037500	1034700	2.45985	-0.871378	-3.33122	2970
Q80X68;Q9CZU6	Citrate synthase;Citrate synthase, mitochondrial	Csl;Cs	tr|Q80X68|Q80X68_MOUSE Citrate synthase OS=Mus musculus GN=Csl PE=1 SV=1;sp|Q9CZU6|CISY_MOUSE Citrate synthase, mitochondrial OS=Mus musculus GN=Cs PE=1 SV=1	2	2	4.5	52.325	466	0.0027076	2.7103	1405400	128330	0	402500	458220	347780	2.45461	-2.21127	-4.66587	2567
P26043	Radixin	Rdx	sp|P26043|RADI_MOUSE Radixin OS=Mus musculus GN=Rdx PE=1 SV=3	1	15	23.7	68.542	583	0	22.998	10373000	80049	1957400	2026800	2552000	1638100	2.45325	0.137212	-2.31604	919
Q61205	Platelet-activating factor acetylhydrolase IB subunit gamma	Pafah1b3	sp|Q61205|PA1B3_MOUSE Platelet-activating factor acetylhydrolase IB subunit gamma OS=Mus musculus GN=Pafah1b3 PE=1 SV=1	1	10	62.1	25.853	232	0	27.449	25262000	169520	4999700	5882700	6687200	2624000	2.43781	1.33948	-1.09834	2009
A2AJB7	Epididymal-specific lipocalin-5;Epididymal-specific lipocalin-5, major form;Epididymal-specific lipocalin-5, minor form	Lcn5	sp|A2AJB7|LCN5_MOUSE Epididymal-specific lipocalin-5 OS=Mus musculus GN=Lcn5 PE=1 SV=1	1	4	22.9	21.013	192	0	32.588	5801400	0	250780	0	4357500	902870	2.43061	-1.83946	-4.27007	82
Q8CAA7	Glucose 1,6-bisphosphate synthase	Pgm2l1	sp|Q8CAA7|PGM2L_MOUSE Glucose 1,6-bisphosphate synthase OS=Mus musculus GN=Pgm2l1 PE=1 SV=1	1	9	15.8	70.279	621	0	12.757	3083600	48651	213410	434570	1018700	306480	2.42287	-1.85099	-4.27386	3014
Q9CU62	Structural maintenance of chromosomes protein 1A	Smc1a	sp|Q9CU62|SMC1A_MOUSE Structural maintenance of chromosomes protein 1A OS=Mus musculus GN=Smc1a PE=1 SV=4	1	5	4.2	143.23	1233	0.00050125	4.2039	2512400	320430	29809	359020	736070	452800	2.42263	-1.91141	-4.33403	3981
Q9EST5	Acidic leucine-rich nuclear phosphoprotein 32 family member B	Anp32b	sp|Q9EST5|AN32B_MOUSE Acidic leucine-rich nuclear phosphoprotein 32 family member B OS=Mus musculus GN=Anp32b PE=1 SV=1	1	4	18	31.078	272	0	54.409	30029000	1669400	1136000	7529200	7826100	5323300	2.39134	1.87396	-0.517374	4552
P04117	Fatty acid-binding protein, adipocyte	Fabp4	sp|P04117|FABP4_MOUSE Fatty acid-binding protein, adipocyte OS=Mus musculus GN=Fabp4 PE=1 SV=3	1	7	38.6	14.65	132	0	27.414	145950000	2962900	20122000	24968000	49393000	44666000	2.38954	4.35938	1.96984	723
Q9WVA4;Q9R1Q8	Transgelin-2	Tagln2	sp|Q9WVA4|TAGL2_MOUSE Transgelin-2 OS=Mus musculus GN=Tagln2 PE=1 SV=4	2	7	35.7	22.395	199	0	26.089	9760200	135780	1032700	1279500	4152500	1141600	2.3726	-0.0235351	-2.39614	4848
Q8VDQ1	Prostaglandin reductase 2	Ptgr2	sp|Q8VDQ1|PTGR2_MOUSE Prostaglandin reductase 2 OS=Mus musculus GN=Ptgr2 PE=1 SV=2	1	3	7.7	38.015	351	0.00071874	3.4612	3632300	241510	0	971930	1347400	304950	2.37116	-1.33182	-3.70299	3429
Q9R020	Zinc finger Ran-binding domain-containing protein 2	Zranb2	sp|Q9R020|ZRAB2_MOUSE Zinc finger Ran-binding domain-containing protein 2 OS=Mus musculus GN=Zranb2 PE=1 SV=2	1	3	13.9	37.35	330	0.0007278	3.6803	2533700	0	312180	735510	829070	548140	2.36894	-1.41741	-3.78634	4749
P63028	Translationally-controlled tumor protein	Tpt1	sp|P63028|TCTP_MOUSE Translationally-controlled tumor protein OS=Mus musculus GN=Tpt1 PE=1 SV=1	1	4	30.2	19.462	172	0	32.421	245820000	1427800	62381000	47170000	62651000	32392000	2.36574	4.62514	2.25939	1352
Q9QXE7	F-box-like/WD repeat-containing protein TBL1X	Tbl1x	sp|Q9QXE7|TBL1X_MOUSE F-box-like/WD repeat-containing protein TBL1X OS=Mus musculus GN=Tbl1x PE=1 SV=2	1	10	23.3	56.802	527	0	10.244	4173700	190270	169150	635270	2110600	487750	2.36314	-1.09464	-3.45777	4680
Q9JHU9	Inositol-3-phosphate synthase 1	Isyna1	sp|Q9JHU9|INO1_MOUSE Inositol-3-phosphate synthase 1 OS=Mus musculus GN=Isyna1 PE=1 SV=1	1	16	36.1	60.931	557	0	223.89	151400000	1195600	25590000	27845000	31257000	21445000	2.35033	3.83893	1.4886	4569
Q61035;Q99KK9	Histidine--tRNA ligase, cytoplasmic	Hars	sp|Q61035|SYHC_MOUSE Histidine--tRNA ligase, cytoplasmic OS=Mus musculus GN=Hars PE=1 SV=2	2	13	26.1	57.432	509	0	79.545	19966000	228380	2789000	4526000	5400100	2292800	2.3501	1.0457	-1.30439	1990
Q9CXU9	Eukaryotic translation initiation factor 1b	Eif1b	sp|Q9CXU9|EIF1B_MOUSE Eukaryotic translation initiation factor 1b OS=Mus musculus GN=Eif1b PE=1 SV=2	1	7	44.2	12.823	113	0	11.485	8957900	1820500	82391	995320	2875300	2228100	2.34805	0.000512123	-2.34754	4032
P14152	Malate dehydrogenase, cytoplasmic	Mdh1	sp|P14152|MDHC_MOUSE Malate dehydrogenase, cytoplasmic OS=Mus musculus GN=Mdh1 PE=1 SV=3	1	7	26.3	36.511	334	0	161.9	122340000	912400	24392000	23582000	29720000	15851000	2.3304	3.58942	1.25902	817
Q8BHA3	Probable D-tyrosyl-tRNA(Tyr) deacylase 2	Dtd2	sp|Q8BHA3|DTD2_MOUSE Probable D-tyrosyl-tRNA(Tyr) deacylase 2 OS=Mus musculus GN=Dtd2 PE=1 SV=1	1	4	38.7	18.236	168	0	30.171	15802000	0	3682000	2732300	3740500	2407900	2.3266	0.649967	-1.67664	2688
P10649	Glutathione S-transferase Mu 1	Gstm1	sp|P10649|GSTM1_MOUSE Glutathione S-transferase Mu 1 OS=Mus musculus GN=Gstm1 PE=1 SV=2	1	20	76.6	25.97	218	0	306.42	1687800000	11349000	346330000	353210000	405800000	180270000	2.32604	7.31727	4.99123	783
Q99J77		Nans	tr|Q99J77|Q99J77_MOUSE N-acetylneuraminic acid synthase (Sialic acid synthase) OS=Mus musculus GN=Nans PE=1 SV=1	1	3	11.7	40.024	359	0	10.289	3751400	64409	356130	1045100	968270	359310	2.32515	-1.37693	-3.70208	3704
P06801	NADP-dependent malic enzyme	Me1	sp|P06801|MAOX_MOUSE NADP-dependent malic enzyme OS=Mus musculus GN=Me1 PE=1 SV=2	1	29	48.1	63.953	572	0	323.31	169140000	1378500	28377000	35653000	34442000	20365000	2.31376	3.97962	1.66585	738
Q9CRA5	Golgi phosphoprotein 3	Golph3	sp|Q9CRA5|GOLP3_MOUSE Golgi phosphoprotein 3 OS=Mus musculus GN=Golph3 PE=1 SV=1	1	3	8.1	33.752	298	0.00071378	3.3655	2824700	380110	0	287750	749230	1317400	2.31026	-1.49572	-3.80598	3967
P28271	Cytoplasmic aconitate hydratase	Aco1	sp|P28271|ACOC_MOUSE Cytoplasmic aconitate hydratase OS=Mus musculus GN=Aco1 PE=1 SV=3	1	17	22.6	98.124	889	0	46.498	16634000	127380	3236900	3395000	3932000	2004200	2.30827	0.69016	-1.61811	936
P46737	Lys-63-specific deubiquitinase BRCC36	Brcc3	sp|P46737|BRCC3_MOUSE Lys-63-specific deubiquitinase BRCC36 OS=Mus musculus GN=Brcc3 PE=1 SV=1	1	15	49.5	33.34	291	0	169.39	87283000	2608400	6456800	19163000	17672000	20374000	2.30239	3.36036	1.05797	1055
Q7TPR4	Alpha-actinin-1	Actn1	sp|Q7TPR4|ACTN1_MOUSE Alpha-actinin-1 OS=Mus musculus GN=Actn1 PE=1 SV=1	1	11	14.6	103.07	892	0.00094697	3.2884	501590	19473	27159	98712	118380	103220	2.29924	-4.12219	-6.42142	2464
P03953	Complement factor D	Cfd	sp|P03953|CFAD_MOUSE Complement factor D OS=Mus musculus GN=Cfd PE=1 SV=1	1	2	8.1	28.057	259	0.00051613	4.6561	9219300	0	1509400	1282000	2661900	1174400	2.29645	-0.222816	-2.51926	722
P56390	Cyclin-dependent kinases regulatory subunit 2	Cks2	sp|P56390|CKS2_MOUSE Cyclin-dependent kinases regulatory subunit 2 OS=Mus musculus GN=Cks2 PE=1 SV=1	1	2	24.1	9.8742	79	0.0016313	3.0861	13417000	0	4292500	1317600	3626200	2901900	2.29601	0.374049	-1.92196	1182
P21619	Lamin-B2	Lmnb2	sp|P21619|LMNB2_MOUSE Lamin-B2 OS=Mus musculus GN=Lmnb2 PE=1 SV=2	1	5	9.4	67.317	596	0.0002635	5.0208	1467500	12204	118750	33742	134700	1168100	2.28476	-3.40952	-5.69427	885
O88851	Putative hydrolase RBBP9	Rbbp9	sp|O88851|RBBP9_MOUSE Putative hydrolase RBBP9 OS=Mus musculus GN=Rbbp9 PE=1 SV=2	1	3	23.1	20.911	186	0	8.6047	9600600	87259	1942700	1630600	2796500	1465900	2.28246	0.0231969	-2.25926	671
P24452	Macrophage-capping protein	Capg	sp|P24452|CAPG_MOUSE Macrophage-capping protein OS=Mus musculus GN=Capg PE=1 SV=2	1	3	11.1	39.24	352	0.00026824	5.3578	2493700	0	469770	368090	865440	458980	2.27203	-1.81503	-4.08706	905
P97350	Plakophilin-1	Pkp1	sp|P97350|PKP1_MOUSE Plakophilin-1 OS=Mus musculus GN=Pkp1 PE=1 SV=1	1	8	13.3	80.895	728	0	48.061	1963800	13578	35844	38104	1858600	14146	2.26992	-4.21146	-6.48138	1452
Q91XV3	Brain acid soluble protein 1	Basp1	sp|Q91XV3|BASP1_MOUSE Brain acid soluble protein 1 OS=Mus musculus GN=Basp1 PE=1 SV=3	1	9	75.2	22.086	226	0	254.52	75063000	1928000	9512100	18277000	25115000	15855000	2.26661	3.38603	1.11941	3572
Q8C6E0	Cilia- and flagella-associated protein 36	Cfap36	sp|Q8C6E0|CFA36_MOUSE Cilia- and flagella-associated protein 36 OS=Mus musculus GN=Cfap36 PE=1 SV=1	1	13	48.4	39.599	343	0	84.154	92371000	882990	15411000	15727000	28990000	10171000	2.26512	3.16927	0.904158	2990
Q3UDE2	Tubulin--tyrosine ligase-like protein 12	Ttll12	sp|Q3UDE2|TTL12_MOUSE Tubulin--tyrosine ligase-like protein 12 OS=Mus musculus GN=Ttll12 PE=1 SV=1	1	5	8.9	74.042	639	0	7.7211	2498900	0	311350	583060	595520	478830	2.24326	-1.75323	-3.99649	1710
P97825	Hematological and neurological expressed 1 protein;Hematological and neurological expressed 1 protein, N-terminally processed	Hn1	sp|P97825|HN1_MOUSE Hematological and neurological expressed 1 protein OS=Mus musculus GN=Hn1 PE=1 SV=3	1	2	16.2	16.08	154	0	10.648	6328800	0	1597000	1261100	1397300	829400	2.23779	-0.707919	-2.94571	1496
P15626;F6Y363	Glutathione S-transferase Mu 2	Gstm2	sp|P15626|GSTM2_MOUSE Glutathione S-transferase Mu 2 OS=Mus musculus GN=Gstm2 PE=1 SV=2	2	22	82.1	25.716	218	0	323.31	2331200000	19279000	476760000	456050000	555340000	302480000	2.2359	7.83992	5.60402	832
Q91YP3	Deoxyribose-phosphate aldolase	Dera	sp|Q91YP3|DEOC_MOUSE Deoxyribose-phosphate aldolase OS=Mus musculus GN=Dera PE=1 SV=1	1	1	3.8	34.975	318	0	18.603	343340	0	0	125370	131210	86771	2.23071	-4.04122	-6.27193	3588
Q8C1A5	Thimet oligopeptidase	Thop1	sp|Q8C1A5|THOP1_MOUSE Thimet oligopeptidase OS=Mus musculus GN=Thop1 PE=1 SV=1	1	22	38.6	78.025	687	0	207.1	41079000	495230	6212600	8388500	9845700	5413800	2.21278	2.04444	-0.168337	2938
P08030	Adenine phosphoribosyltransferase	Aprt	sp|P08030|APT_MOUSE Adenine phosphoribosyltransferase OS=Mus musculus GN=Aprt PE=1 SV=2	1	3	20	19.724	180	0.0016306	3.0851	4413700	0	606260	843380	1274300	552730	2.2121	-1.14087	-3.35297	750
O35566	CD151 antigen	Cd151	sp|O35566|CD151_MOUSE CD151 antigen OS=Mus musculus GN=Cd151 PE=1 SV=2	1	2	9.9	28.246	253	0.0005152	4.6363	1425100	99799	0	311690	567270	446300	2.20894	-2.11162	-4.32055	517
Q60974	Nuclear receptor corepressor 1	Ncor1	sp|Q60974|NCOR1_MOUSE Nuclear receptor corepressor 1 OS=Mus musculus GN=Ncor1 PE=1 SV=1	1	14	6.9	270.64	2453	0	32.342	1719300	133130	85017	432130	704120	323820	2.20678	-2.00484	-4.21162	1984
P17182;P17183	Alpha-enolase	Eno1	sp|P17182|ENOA_MOUSE Alpha-enolase OS=Mus musculus GN=Eno1 PE=1 SV=3	2	22	50.7	47.14	434	0	273.15	303630000	2341000	68178000	61515000	65730000	40086000	2.19823	4.87838	2.68016	847
Q9CR16	Peptidyl-prolyl cis-trans isomerase D	Ppid	sp|Q9CR16|PPID_MOUSE Peptidyl-prolyl cis-trans isomerase D OS=Mus musculus GN=Ppid PE=1 SV=3	1	9	22.2	40.742	370	0	13.866	35656000	770090	3590900	9614300	9298100	4063100	2.18979	1.94449	-0.245298	3949
Q8C1R3	Uncharacterized protein C17orf50 homolog		sp|Q8C1R3|CQ050_MOUSE Uncharacterized protein C17orf50 homolog OS=Mus musculus PE=2 SV=1	1	2	12.7	21.117	189	0.00051854	4.7147	4467700	1366600	0	861780	1342400	555920	2.18481	-1.10269	-3.2875	2943
Q8BPU7	Engulfment and cell motility protein 1	Elmo1	sp|Q8BPU7|ELMO1_MOUSE Engulfment and cell motility protein 1 OS=Mus musculus GN=Elmo1 PE=1 SV=2	1	3	4.7	83.935	727	0.000492	3.9063	669460	64510	28586	179700	183480	184700	2.17692	-3.34354	-5.52046	2793
Q9DBB9	Carboxypeptidase N subunit 2	Cpn2	sp|Q9DBB9|CPN2_MOUSE Carboxypeptidase N subunit 2 OS=Mus musculus GN=Cpn2 PE=1 SV=2	1	3	5.9	60.478	547	0.00026323	5.0109	1650200	84269	124490	471370	527990	325460	2.16734	-2.09905	-4.2664	4417
P61971	Nuclear transport factor 2	Nutf2	sp|P61971|NTF2_MOUSE Nuclear transport factor 2 OS=Mus musculus GN=Nutf2 PE=1 SV=1	1	3	24.4	14.478	127	0	12.024	55071000	369660	14051000	8708400	13059000	7809100	2.16502	2.37444	0.209415	1276
A2AJ38		Gm13941	tr|A2AJ38|A2AJ38_MOUSE Protein Gm13941 (Fragment) OS=Mus musculus GN=Gm13941 PE=4 SV=1	1	2	9.4	26.914	245	0.00049334	3.9685	1848700	0	0	369060	227950	411440	2.15536	-2.50792	-4.66327	80
P61957	Small ubiquitin-related modifier 2	Sumo2	sp|P61957|SUMO2_MOUSE Small ubiquitin-related modifier 2 OS=Mus musculus GN=Sumo2 PE=1 SV=1	1	2	23.2	10.871	95	0	28.451	667990000	6519600	132170000	98401000	190300000	98385000	2.1508	6.04729	3.8965	1272
Q9D385	ADP-ribosylation factor-like protein 2-binding protein	Arl2bp	sp|Q9D385|AR2BP_MOUSE ADP-ribosylation factor-like protein 2-binding protein OS=Mus musculus GN=Arl2bp PE=1 SV=1	1	3	17.2	18.754	163	0.00049493	4.0036	13453000	131610	2754500	2090300	3481200	2167700	2.14703	0.436079	-1.71096	4176
Q64442	Sorbitol dehydrogenase	Sord	sp|Q64442|DHSO_MOUSE Sorbitol dehydrogenase OS=Mus musculus GN=Sord PE=1 SV=3	1	8	28.3	38.249	357	0	40.053	70701000	948160	11035000	12233000	18519000	10717000	2.14349	2.85808	0.714588	2149
Q99PM3	Transcription initiation factor IIA subunit 1;Transcription initiation factor IIA alpha chain;Transcription initiation factor IIA beta chain	Gtf2a1	sp|Q99PM3|TF2AA_MOUSE Transcription initiation factor IIA subunit 1 OS=Mus musculus GN=Gtf2a1 PE=1 SV=2	1	1	2.9	41.614	378	0.0045239	2.2394	1326900	0	0	0	488520	375630	2.14219	-3.23727	-5.37946	3825
O55060	Thiopurine S-methyltransferase	Tpmt	sp|O55060|TPMT_MOUSE Thiopurine S-methyltransferase OS=Mus musculus GN=Tpmt PE=1 SV=1	1	3	15.4	27.585	240	0	7.4759	7517900	82780	1390800	1125900	2410200	1025500	2.14013	-0.398221	-2.53835	574
Q9D1C2	Protein chibby homolog 1	Cby1	sp|Q9D1C2|CBY1_MOUSE Protein chibby homolog 1 OS=Mus musculus GN=Cby1 PE=1 SV=1	1	4	33.1	14.534	127	0	34.168	50232000	1567300	3178000	7861400	12801000	7831800	2.13785	2.31703	0.179179	4130
Q920E5;A0A0G2JEA5	Farnesyl pyrophosphate synthase	Fdps	sp|Q920E5|FPPS_MOUSE Farnesyl pyrophosphate synthase OS=Mus musculus GN=Fdps PE=1 SV=1;tr|A0A0G2JEA5|A0A0G2JEA5_MOUSE Protein Gm43738 OS=Mus musculus GN=Gm43738 PE=3 SV=1	2	5	17.8	40.581	353	0.00027473	5.7512	6133600	161190	638920	1113500	1846700	1118600	2.12892	-0.489825	-2.61875	3615
Q04447	Creatine kinase B-type	Ckb	sp|Q04447|KCRB_MOUSE Creatine kinase B-type OS=Mus musculus GN=Ckb PE=1 SV=1	1	4	11.5	42.713	381	0.00028098	6.2293	3160400	0	157760	679460	645580	578550	2.12879	-1.54986	-3.67865	1537
Q9JI75	Ribosyldihydronicotinamide dehydrogenase [quinone]	Nqo2	sp|Q9JI75|NQO2_MOUSE Ribosyldihydronicotinamide dehydrogenase [quinone] OS=Mus musculus GN=Nqo2 PE=1 SV=3	1	3	13.4	26.248	231	0.00027435	5.7256	5009200	124910	555420	988010	1404300	907050	2.12387	-0.77984	-2.90372	4577
Q8R3I3	Conserved oligomeric Golgi complex subunit 6	Cog6	sp|Q8R3I3|COG6_MOUSE Conserved oligomeric Golgi complex subunit 6 OS=Mus musculus GN=Cog6 PE=1 SV=2	1	25	44.7	73.039	657	0	323.31	133650000	8552200	4844900	27565000	24305000	27348000	2.12267	3.83003	1.70736	3336
P10518	Delta-aminolevulinic acid dehydratase	Alad	sp|P10518|HEM2_MOUSE Delta-aminolevulinic acid dehydratase OS=Mus musculus GN=Alad PE=1 SV=1	1	11	42.1	36.023	330	0	95.535	34654000	614350	4390300	6161100	9554400	5132300	2.11921	1.85591	-0.263295	778
P09041	Phosphoglycerate kinase 2	Pgk2	sp|P09041|PGK2_MOUSE Phosphoglycerate kinase 2 OS=Mus musculus GN=Pgk2 PE=1 SV=4	1	20	50.4	44.852	417	0	323.31	181980000	2664400	31554000	38508000	48881000	27755000	2.11615	4.33391	2.21776	758
P21300	Aldose reductase-related protein 1	Akr1b7	sp|P21300|ALD1_MOUSE Aldose reductase-related protein 1 OS=Mus musculus GN=Akr1b7 PE=1 SV=4	1	7	16.1	35.988	316	0	8.8044	3665500	0	683080	1442400	376110	577710	2.10786	-1.44837	-3.55623	882
Q9R0D8	WD repeat-containing protein 54	Wdr54	sp|Q9R0D8|WDR54_MOUSE WD repeat-containing protein 54 OS=Mus musculus GN=Wdr54 PE=1 SV=1	1	7	33.2	35.612	334	0	111.63	25085000	312700	4743800	5300000	5690100	3799800	2.08429	1.38972	-0.694573	4757
P28474;Q64437	Alcohol dehydrogenase class-3	Adh5	sp|P28474|ADHX_MOUSE Alcohol dehydrogenase class-3 OS=Mus musculus GN=Adh5 PE=1 SV=3	2	10	22.2	39.547	374	0	18.856	31547000	619860	4270100	8572000	9932700	3198500	2.08288	1.806	-0.276878	938
Q8VCT4;Q91WU0;E9PYP1;Q64176	Carboxylesterase 1D	Ces1d	sp|Q8VCT4|CES1D_MOUSE Carboxylesterase 1D OS=Mus musculus GN=Ces1d PE=1 SV=1	4	13	26.4	61.787	565	0	75.114	13488000	170780	2629200	3723400	2322100	2199600	2.08263	0.526024	-1.5566	3402
Q64471	Glutathione S-transferase theta-1	Gstt1	sp|Q64471|GSTT1_MOUSE Glutathione S-transferase theta-1 OS=Mus musculus GN=Gstt1 PE=1 SV=4	1	2	10	27.374	240	0.00051374	4.6001	5420800	303180	255280	1272100	1983000	538460	2.08168	-0.743139	-2.82482	2151
P61164;Q8R5C5	Alpha-centractin;Beta-centractin	Actr1a;Actr1b	sp|P61164|ACTZ_MOUSE Alpha-centractin OS=Mus musculus GN=Actr1a PE=1 SV=1;sp|Q8R5C5|ACTY_MOUSE Beta-centractin OS=Mus musculus GN=Actr1b PE=1 SV=1	2	14	48.7	42.613	376	0	140.34	94818000	6602700	3526000	20874000	16038000	20992000	2.07768	3.3692	1.29152	1250
A6H630	Protein-glutamate O-methyltransferase	Armt1	sp|A6H630|ARMT1_MOUSE Protein-glutamate O-methyltransferase OS=Mus musculus GN=Armt1 PE=1 SV=1	1	15	28	50.548	439	0	48.981	42180000	732610	6121100	9725000	10045000	5989600	2.07035	2.17378	0.103433	126
Q9CPU0	Lactoylglutathione lyase	Glo1	sp|Q9CPU0|LGUL_MOUSE Lactoylglutathione lyase OS=Mus musculus GN=Glo1 PE=1 SV=3	1	2	10.3	20.809	184	0	6.6854	9511100	116990	1713500	1860200	2672700	1089200	2.06025	-0.0780656	-2.13832	3850
Q9WVE8	Protein kinase C and casein kinase substrate in neurons protein 2	Pacsin2	sp|Q9WVE8|PACN2_MOUSE Protein kinase C and casein kinase substrate in neurons protein 2 OS=Mus musculus GN=Pacsin2 PE=1 SV=1	1	8	17.7	55.832	486	0	22.306	10397000	578070	678750	2429000	3264800	1842600	2.05318	0.399292	-1.65389	4850
P70412	CUB and zona pellucida-like domain-containing protein 1	Cuzd1	sp|P70412|CUZD1_MOUSE CUB and zona pellucida-like domain-containing protein 1 OS=Mus musculus GN=Cuzd1 PE=1 SV=2	1	4	8.6	68.081	606	0	12.392	918800	28449	0	0	754100	136250	2.04964	-3.33123	-5.38087	1408
Q9DAK9	14 kDa phosphohistidine phosphatase	Phpt1	sp|Q9DAK9|PHP14_MOUSE 14 kDa phosphohistidine phosphatase OS=Mus musculus GN=Phpt1 PE=1 SV=1	1	5	44.4	13.996	124	0	32.458	97891000	943000	22514000	14486000	34967000	11168000	2.03984	3.26486	1.22502	4380
Q64669	NAD(P)H dehydrogenase [quinone] 1	Nqo1	sp|Q64669|NQO1_MOUSE NAD(P)H dehydrogenase [quinone] 1 OS=Mus musculus GN=Nqo1 PE=1 SV=3	1	3	11.3	30.959	274	0.0018501	2.959	1499300	61557	0	180120	552710	206600	2.0346	-2.75823	-4.79283	2156
Q9D9H8	UPF0565 protein C2orf69 homolog		sp|Q9D9H8|CB069_MOUSE UPF0565 protein C2orf69 homolog OS=Mus musculus PE=2 SV=3	1	2	5.5	41.689	365	0.0030628	2.4159	2758300	0	198670	2139800	182640	101090	2.02069	-2.44432	-4.46501	4328
P51163	Uroporphyrinogen-III synthase	Uros	sp|P51163|HEM4_MOUSE Uroporphyrinogen-III synthase OS=Mus musculus GN=Uros PE=1 SV=1	1	2	9.8	28.504	265	0.0067797	2.0786	1647400	0	425530	317560	526540	251980	2.01612	-2.41337	-4.42949	1120
O88271	Craniofacial development protein 1	Cfdp1	sp|O88271|CFDP1_MOUSE Craniofacial development protein 1 OS=Mus musculus GN=Cfdp1 PE=1 SV=1	1	3	15.9	32.921	295	0.00050163	4.2128	3761300	0	697310	761210	1025800	394420	2.01578	-1.45677	-3.47255	626
Q7TNL7		Dusp9	tr|Q7TNL7|Q7TNL7_MOUSE Dual specificity phosphatase 9 OS=Mus musculus GN=Dusp9 PE=1 SV=1	1	2	6	48.657	452	0.0049335	2.2027	1765900	419060	0	454210	367240	466150	2.00436	-2.11871	-4.12307	2457
Q8CE33	Kelch-like protein 11	Klhl11	sp|Q8CE33|KLH11_MOUSE Kelch-like protein 11 OS=Mus musculus GN=Klhl11 PE=1 SV=1	1	7	14.4	80.428	709	0	9.188	2665100	113770	95849	343330	527170	336620	2.00246	-2.23601	-4.23847	3052
Q91YR9;REV__Q3TVC7	Prostaglandin reductase 1	Ptgr1	sp|Q91YR9|PTGR1_MOUSE Prostaglandin reductase 1 OS=Mus musculus GN=Ptgr1 PE=1 SV=2	2	12	38.3	35.56	329	0	148.67	39122000	434320	7203200	5345900	10653000	5174800	2.00025	1.84397	-0.156286	3593
Q6P8X9	Protein Flattop	Cfap126	sp|Q6P8X9|FLTOP_MOUSE Protein Flattop OS=Mus musculus GN=Cfap126 PE=1 SV=1	1	2	13.2	20.55	189	0.0031215	2.5797	1107700	0	0	198590	665930	190030	1.9956	-2.66187	-4.65747	2291
E9PYL2		Prr12	sp|E9PYL2|PRR12_MOUSE Proline-rich protein 12 OS=Mus musculus GN=Prr12 PE=1 SV=1	1	1	1.2	211.87	2035	0.0095654	1.9191	1363700	0	107120	373800	628550	169070	1.98983	-2.4417	-4.43153	294
Q80U87	Ubiquitin carboxyl-terminal hydrolase 8	Usp8	sp|Q80U87|UBP8_MOUSE Ubiquitin carboxyl-terminal hydrolase 8 OS=Mus musculus GN=Usp8 PE=1 SV=2	1	6	6.3	122.61	1080	0	6.5517	748140	80574	30549	145490	208200	208760	1.98673	-3.32542	-5.31216	2513
Q8C115	Pleckstrin homology domain-containing family H member 2	Plekhh2	sp|Q8C115|PKHH2_MOUSE Pleckstrin homology domain-containing family H member 2 OS=Mus musculus GN=Plekhh2 PE=1 SV=3	1	5	4.3	167.73	1491	0	10.536	686380	47430	0	119980	240980	114540	1.97694	-3.63648	-5.61342	2932
Q99J36	THUMP domain-containing protein 1	Thumpd1	sp|Q99J36|THUM1_MOUSE THUMP domain-containing protein 1 OS=Mus musculus GN=Thumpd1 PE=1 SV=1	1	10	26	38.884	350	0	40.476	24831000	231070	6671400	4864300	6315000	3155700	1.97608	1.30925	-0.666825	3698
Q8K3C3	Protein LZIC	Lzic	sp|Q8K3C3|LZIC_MOUSE Protein LZIC OS=Mus musculus GN=Lzic PE=1 SV=1	1	3	10.5	21.536	190	0.00051086	4.4985	11196000	110870	2757800	1575700	2793800	1930200	1.97237	0.138583	-1.83379	3237
P81117	Nucleobindin-2;Nesfatin-1	Nucb2	sp|P81117|NUCB2_MOUSE Nucleobindin-2 OS=Mus musculus GN=Nucb2 PE=1 SV=2	1	4	11	50.304	420	0.0005071	4.3987	1296700	0	104530	366760	293680	256750	1.97113	-2.61585	-4.58699	1428
Q8BIL5	Protein Hook homolog 1	Hook1	sp|Q8BIL5|HOOK1_MOUSE Protein Hook homolog 1 OS=Mus musculus GN=Hook1 PE=1 SV=2	1	36	46.7	84.438	728	0	323.31	166730000	10463000	8821300	28835000	37333000	41190000	1.96996	4.25504	2.28509	2713
Q9DBJ3	Brain-specific angiogenesis inhibitor 1-associated protein 2-like protein 1	Baiap2l1	sp|Q9DBJ3|BI2L1_MOUSE Brain-specific angiogenesis inhibitor 1-associated protein 2-like protein 1 OS=Mus musculus GN=Baiap2l1 PE=1 SV=1	1	17	31.7	57.187	514	0	42.693	14998000	188650	1159700	1372300	1710100	2158800	1.96515	-0.110106	-2.07525	4432
Q91WZ8	Dysbindin	Dtnbp1	sp|Q91WZ8|DTBP1_MOUSE Dysbindin OS=Mus musculus GN=Dtnbp1 PE=1 SV=1	1	3	9.4	39.651	352	0	9.9776	1740700	79986	183930	617390	517720	276250	1.9649	-2.05756	-4.02246	3555
O89050	Muskelin	Mkln1	sp|O89050|MKLN1_MOUSE Muskelin OS=Mus musculus GN=Mkln1 PE=1 SV=1	1	4	7.6	84.877	735	0.00028337	6.4582	941040	78190	27353	95910	313550	161710	1.96182	-3.45172	-5.41354	683
P47739	Aldehyde dehydrogenase, dimeric NADP-preferring	Aldh3a1	sp|P47739|AL3A1_MOUSE Aldehyde dehydrogenase, dimeric NADP-preferring OS=Mus musculus GN=Aldh3a1 PE=1 SV=2	1	7	16.6	50.48	453	0.00027144	5.5697	3189700	78778	312930	936850	660550	303710	1.95582	-1.69428	-3.6501	1061
P07309	Transthyretin	Ttr	sp|P07309|TTHY_MOUSE Transthyretin OS=Mus musculus GN=Ttr PE=1 SV=1	1	7	46.9	15.776	147	0	137.64	202210000	2078700	46918000	46603000	35158000	28521000	1.95543	4.28029	2.32485	740
Q99L47	Hsc70-interacting protein	St13	sp|Q99L47|F10A1_MOUSE Hsc70-interacting protein OS=Mus musculus GN=St13 PE=1 SV=1	1	11	29.9	41.655	371	0	229.86	303210000	5137200	50784000	72724000	72792000	38070000	1.94852	4.98314	3.03462	3757
P30681	High mobility group protein B2	Hmgb2	sp|P30681|HMGB2_MOUSE High mobility group protein B2 OS=Mus musculus GN=Hmgb2 PE=1 SV=3	1	8	31	24.162	210	0	78.816	259620000	1957900	78083000	52869000	55361000	30259000	1.93864	4.58774	2.6491	962
Q8CDT7	Uncharacterized protein C10orf107 homolog		sp|Q8CDT7|CJ107_MOUSE Uncharacterized protein C10orf107 homolog OS=Mus musculus PE=2 SV=2	1	2	10.1	24.087	208	0.0031042	2.5473	845890	54046	67568	111330	268070	344870	1.93645	-3.09117	-5.02761	3050
E9Q264		Myh15	tr|E9Q264|E9Q264_MOUSE Protein Myh15 OS=Mus musculus GN=Myh15 PE=1 SV=1	1	3	1.6	221.84	1925	0.0097571	1.9005	752880	31039	81505	170740	186790	186070	1.93641	-3.35598	-5.29239	314
P14824	Annexin A6	Anxa6	sp|P14824|ANXA6_MOUSE Annexin A6 OS=Mus musculus GN=Anxa6 PE=1 SV=3	1	10	16.5	75.884	673	0	16.065	2689300	0	194530	586180	854140	410310	1.93556	-1.65149	-3.58705	824
Q01320;Q64511	DNA topoisomerase 2-alpha	Top2a	sp|Q01320|TOP2A_MOUSE DNA topoisomerase 2-alpha OS=Mus musculus GN=Top2a PE=1 SV=2	2	14	10.1	172.79	1528	0	31.09	1795400	88812	190340	388660	419730	624810	1.93371	-1.98854	-3.92225	1517
Q8CG72	Poly(ADP-ribose) glycohydrolase ARH3	Adprhl2	sp|Q8CG72|ARHL2_MOUSE Poly(ADP-ribose) glycohydrolase ARH3 OS=Mus musculus GN=Adprhl2 PE=1 SV=1	1	2	5.4	39.414	370	0.0031404	2.6514	885350	0	90026	240660	270440	122340	1.93361	-3.2146	-5.14821	3074
Q8VCG1		Dut	tr|Q8VCG1|Q8VCG1_MOUSE Deoxyuridine triphosphatase, isoform CRA_b OS=Mus musculus GN=Dut PE=1 SV=1	1	5	31	21.251	200	0	50.311	25822000	308060	5034700	4737300	7737500	2394900	1.92399	1.26156	-0.662427	3394
Q9D819	Inorganic pyrophosphatase	Ppa1	sp|Q9D819|IPYR_MOUSE Inorganic pyrophosphatase OS=Mus musculus GN=Ppa1 PE=1 SV=1	1	14	54	32.667	289	0	88.283	35676000	495990	6955800	6301300	10406000	4371500	1.91635	1.83063	-0.0857201	4277
Q80TR8	Protein VPRBP	Vprbp	sp|Q80TR8|VPRBP_MOUSE Protein VPRBP OS=Mus musculus GN=Vprbp PE=1 SV=4	1	5	4	168.93	1506	0.00050646	4.3866	641080	34589	48512	192890	135030	115390	1.90541	-3.68314	-5.58855	2502
Q9JK81	UPF0160 protein MYG1, mitochondrial	Myg1	sp|Q9JK81|MYG1_MOUSE UPF0160 protein MYG1, mitochondrial OS=Mus musculus GN=Myg1 PE=1 SV=1	1	10	30	42.722	380	0	16.551	4489300	228920	356710	1096200	1121800	828020	1.90443	-0.88172	-2.78615	4620
P17563;Q63836	Selenium-binding protein 1;Selenium-binding protein 2	Selenbp1;Selenbp2	sp|P17563|SBP1_MOUSE Selenium-binding protein 1 OS=Mus musculus GN=Selenbp1 PE=1 SV=2;sp|Q63836|SBP2_MOUSE Selenium-binding protein 2 OS=Mus musculus GN=Selenbp2 PE=1 SV=2	2	24	60	52.513	472	0	79.239	52651000	961570	9022600	12650000	10459000	8423300	1.90415	2.48363	0.579483	851
P70441	Na(+)/H(+) exchange regulatory cofactor NHE-RF1	Slc9a3r1	sp|P70441|NHRF1_MOUSE Na(+)/H(+) exchange regulatory cofactor NHE-RF1 OS=Mus musculus GN=Slc9a3r1 PE=1 SV=3	1	4	16.3	38.6	355	0	10.042	2604600	222440	121120	517230	701380	521920	1.8953	-1.69073	-3.58602	1411
Q8VDK1	Nitrilase homolog 1	Nit1	sp|Q8VDK1|NIT1_MOUSE Nitrilase homolog 1 OS=Mus musculus GN=Nit1 PE=1 SV=2	1	3	12.7	35.705	323	0.00026476	5.107	8566400	957400	331770	1453100	2491300	2111600	1.89401	0.0877155	-1.8063	3420
Q6P902	Thioredoxin domain-containing protein 2	Txndc2	sp|Q6P902|TXND2_MOUSE Thioredoxin domain-containing protein 2 OS=Mus musculus GN=Txndc2 PE=1 SV=1	1	12	31.7	57.766	515	0	128.14	39629000	787150	6922100	8952900	9895500	6104400	1.89198	2.13592	0.243939	2293
Q61207	Prosaposin	Psap	sp|Q61207|SAP_MOUSE Prosaposin OS=Mus musculus GN=Psap PE=1 SV=2	1	2	5	61.422	557	0.0023031	2.902	808580	0	0	228110	545580	19745	1.88597	-3.77998	-5.66594	2011
Q99MI1	ELKS/Rab6-interacting/CAST family member 1	Erc1	sp|Q99MI1|RB6I2_MOUSE ELKS/Rab6-interacting/CAST family member 1 OS=Mus musculus GN=Erc1 PE=1 SV=1	1	3	2.9	128.33	1120	0.00094944	3.3278	720820	0	128410	155610	189030	168430	1.87991	-3.44277	-5.32268	3793
P62204;Q9D6P8;P20801	Calmodulin;Calmodulin-like protein 3	Calm1;Calml3	sp|P62204|CALM_MOUSE Calmodulin OS=Mus musculus GN=Calm1 PE=1 SV=2;sp|Q9D6P8|CALL3_MOUSE Calmodulin-like protein 3 OS=Mus musculus GN=Calml3 PE=2 SV=1	3	12	60.4	16.837	149	0	323.31	1199000000	21417000	213730000	170210000	362250000	207660000	1.87848	6.97962	5.10114	1283
Q8BVU5	ADP-ribose pyrophosphatase, mitochondrial	Nudt9	sp|Q8BVU5|NUDT9_MOUSE ADP-ribose pyrophosphatase, mitochondrial OS=Mus musculus GN=Nudt9 PE=1 SV=1	1	6	20.3	38.604	350	0	12.401	5945800	0	818010	1495100	1594800	798850	1.87159	-0.580536	-2.45212	2857
Q8R1G2	Carboxymethylenebutenolidase homolog	Cmbl	sp|Q8R1G2|CMBL_MOUSE Carboxymethylenebutenolidase homolog OS=Mus musculus GN=Cmbl PE=1 SV=1	1	7	35.1	27.902	245	0	16.222	17775000	497660	2204500	2856900	5633500	2804200	1.85379	0.941616	-0.912179	3297
O09114	Prostaglandin-H2 D-isomerase	Ptgds	sp|O09114|PTGDS_MOUSE Prostaglandin-H2 D-isomerase OS=Mus musculus GN=Ptgds PE=1 SV=1	1	2	13.8	21.066	189	0	7.6847	14709000	241950	2823000	2361900	4436200	2098300	1.84977	0.595757	-1.25402	476
P70699	Lysosomal alpha-glucosidase	Gaa	sp|P70699|LYAG_MOUSE Lysosomal alpha-glucosidase OS=Mus musculus GN=Gaa PE=1 SV=2	1	2	1.8	106.25	953	0.003079	2.4525	485200	18523	50504	102630	124000	85085	1.83594	-4.17408	-6.01002	1421
Q8BH61	Coagulation factor XIII A chain	F13a1	sp|Q8BH61|F13A_MOUSE Coagulation factor XIII A chain OS=Mus musculus GN=F13a1 PE=1 SV=3	1	12	17.2	83.206	732	0	19.866	7836400	178410	1169900	1315900	2176400	1236000	1.82668	-0.282517	-2.10919	2679
Q8BZA9	Fructose-2,6-bisphosphatase TIGAR	Tigar	sp|Q8BZA9|TIGAR_MOUSE Fructose-2,6-bisphosphatase TIGAR OS=Mus musculus GN=Tigar PE=1 SV=1	1	2	8.9	29.19	269	0.00049285	3.9462	2709100	51612	441510	543040	668110	350060	1.82408	-1.88275	-3.70684	2899
Q9QXT0	Protein canopy homolog 2	Cnpy2	sp|Q9QXT0|CNPY2_MOUSE Protein canopy homolog 2 OS=Mus musculus GN=Cnpy2 PE=1 SV=1	1	2	14.3	20.767	182	0.00049665	4.0568	3325600	0	486000	752070	376000	827450	1.8201	-1.58891	-3.40901	4693
Q8R480	Nuclear pore complex protein Nup85	Nup85	sp|Q8R480|NUP85_MOUSE Nuclear pore complex protein Nup85 OS=Mus musculus GN=Nup85 PE=1 SV=1	1	2	3	74.775	656	0.00093414	3.1289	8442500	65621	2289100	2165100	3016400	323250	1.8154	-0.53108	-2.34648	3352
P33174	Chromosome-associated kinesin KIF4	Kif4	sp|P33174|KIF4_MOUSE Chromosome-associated kinesin KIF4 OS=Mus musculus GN=Kif4 PE=1 SV=3	1	11	10.6	139.52	1231	0	13.628	2029400	91667	144100	408480	330010	405070	1.81149	-2.28869	-4.10018	978
Q9CZC8	Secernin-1	Scrn1	sp|Q9CZC8|SCRN1_MOUSE Secernin-1 OS=Mus musculus GN=Scrn1 PE=1 SV=1	1	5	14.7	46.325	414	0	7.3316	62930000	0	43379000	6608000	11424000	735240	1.80452	1.04109	-0.763424	4073
Q91W69;Q80VP1	Epsin-3;Epsin-1	Epn3;Epn1	sp|Q91W69|EPN3_MOUSE Epsin-3 OS=Mus musculus GN=Epn3 PE=1 SV=1;sp|Q80VP1|EPN1_MOUSE Epsin-1 OS=Mus musculus GN=Epn1 PE=1 SV=3	2	2	3.5	68.24	636	0.00072763	3.6652	1543500	341850	23714	294350	377560	232540	1.80393	-2.64843	-4.45236	3524
Q9D8T3	GTPase RhebL1	Rhebl1	sp|Q9D8T3|REBL1_MOUSE GTPase RhebL1 OS=Mus musculus GN=Rhebl1 PE=2 SV=1	1	1	4.9	20.934	184	0.0030857	2.4737	10868000	0	2042300	3585000	423000	3254600	1.80262	-0.12268	-1.9253	4302
A2AEH9		Tmsb15a	tr|A2AEH9|A2AEH9_MOUSE Protein Tmsb15a OS=Mus musculus GN=Tmsb15a PE=4 SV=1	1	1	13.9	8.9093	79	0.00028353	6.4756	21526000	217090	5947700	2926500	5723200	3075600	1.79989	1.00522	-0.794672	64
Q9JKB1;P58321	Ubiquitin carboxyl-terminal hydrolase isozyme L3;Ubiquitin carboxyl-terminal hydrolase isozyme L4	Uchl3;Uchl4	sp|Q9JKB1|UCHL3_MOUSE Ubiquitin carboxyl-terminal hydrolase isozyme L3 OS=Mus musculus GN=Uchl3 PE=1 SV=2;sp|P58321|UCHL4_MOUSE Ubiquitin carboxyl-terminal hydrolase isozyme L4 OS=Mus musculus GN=Uchl4 PE=2 SV=1	2	13	51.7	26.151	230	0	274.04	148240000	1880800	35195000	23726000	40420000	19673000	1.7988	3.84411	2.0453	4623
Q8K4E0	Alstrom syndrome protein 1 homolog	Alms1	sp|Q8K4E0|ALMS1_MOUSE Alstrom syndrome protein 1 homolog OS=Mus musculus GN=Alms1 PE=1 SV=2	1	34	13.9	360.21	3251	0	46.283	2236100	134040	148100	410630	561820	422960	1.79682	-2.00951	-3.80633	3252
Q9CWS0	N(G),N(G)-dimethylarginine dimethylaminohydrolase 1	Ddah1	sp|Q9CWS0|DDAH1_MOUSE N(G),N(G)-dimethylarginine dimethylaminohydrolase 1 OS=Mus musculus GN=Ddah1 PE=1 SV=3	1	5	20	31.381	285	0	14.909	5259600	0	1335700	1095100	1503800	352070	1.79529	-1.15254	-2.94782	4003
P62340	TATA box-binding protein-like protein 1	Tbpl1	sp|P62340|TBPL1_MOUSE TATA box-binding protein-like protein 1 OS=Mus musculus GN=Tbpl1 PE=1 SV=1	1	3	18.3	20.886	186	0.00026448	5.079	6481100	542460	325240	1228300	1993200	1046200	1.79233	-0.438105	-2.23044	1303
P10648;E9Q6L7	Glutathione S-transferase A2;Glutathione S-transferase	Gsta2;Gm10639	sp|P10648|GSTA2_MOUSE Glutathione S-transferase A2 OS=Mus musculus GN=Gsta2 PE=1 SV=3;tr|E9Q6L7|E9Q6L7_MOUSE Glutathione S-transferase OS=Mus musculus GN=Gm10639 PE=1 SV=1	2	7	26.1	25.542	222	0	16.372	83369000	789030	21409000	13497000	17496000	9901000	1.77983	2.83996	1.06013	782
Q9Z0P5	Twinfilin-2	Twf2	sp|Q9Z0P5|TWF2_MOUSE Twinfilin-2 OS=Mus musculus GN=Twf2 PE=1 SV=1	1	3	9.2	39.47	349	0.0027347	2.795	1182500	79850	90877	238330	336280	259150	1.77874	-2.75353	-4.53227	4875
Q9QZ82	Cholesterol side-chain cleavage enzyme, mitochondrial	Cyp11a1	sp|Q9QZ82|CP11A_MOUSE Cholesterol side-chain cleavage enzyme, mitochondrial OS=Mus musculus GN=Cyp11a1 PE=1 SV=1	1	4	8	60.314	526	0.00051335	4.5807	538070	20968	0	101310	150340	142110	1.77409	-3.841	-5.61509	4732
P62500	TSC22 domain family protein 1	Tsc22d1	sp|P62500|T22D1_MOUSE TSC22 domain family protein 1 OS=Mus musculus GN=Tsc22d1 PE=1 SV=2	1	1	1.1	109.81	1077	0	24.355	6363600	94392	1553300	995830	1660000	1124100	1.77152	-0.592432	-2.36395	1306
Q8VC57	BTB/POZ domain-containing protein KCTD5	Kctd5	sp|Q8VC57|KCTD5_MOUSE BTB/POZ domain-containing protein KCTD5 OS=Mus musculus GN=Kctd5 PE=1 SV=1	1	1	6.8	26.163	234	0.00072081	3.5101	2970900	0	532910	329540	1424700	348230	1.769	-1.76131	-3.53031	3381
Q8BTZ7	Mannose-1-phosphate guanyltransferase beta	Gmppb	sp|Q8BTZ7|GMPPB_MOUSE Mannose-1-phosphate guanyltransferase beta OS=Mus musculus GN=Gmppb PE=1 SV=1	1	8	26.9	39.916	360	0	15.149	11936000	435240	1170200	2387500	2842300	1717000	1.75611	0.290409	-1.4657	2830
Q9JHQ5	Leucine zipper transcription factor-like protein 1	Lztfl1	sp|Q9JHQ5|LZTL1_MOUSE Leucine zipper transcription factor-like protein 1 OS=Mus musculus GN=Lztfl1 PE=1 SV=1	1	14	52.5	34.773	299	0	323.31	175870000	3735400	31630000	37263000	41798000	26372000	1.75503	4.21825	2.46322	4564
Q9DBP5	UMP-CMP kinase	Cmpk1	sp|Q9DBP5|KCY_MOUSE UMP-CMP kinase OS=Mus musculus GN=Cmpk1 PE=1 SV=1	1	8	48.5	22.165	196	0	52.533	28221000	461630	5985500	5341200	6765800	3997500	1.74698	1.5011	-0.24588	4436
Q9R1P1	Proteasome subunit beta type-3	Psmb3	sp|Q9R1P1|PSB3_MOUSE Proteasome subunit beta type-3 OS=Mus musculus GN=Psmb3 PE=1 SV=1	1	7	35.6	22.965	205	0	185.96	85757000	1562400	17913000	19923000	19493000	11899000	1.74327	3.1676	1.42433	4783
Q8CHP8	Phosphoglycolate phosphatase	Pgp	sp|Q8CHP8|PGP_MOUSE Glycerol-3-phosphate phosphatase OS=Mus musculus GN=Pgp PE=1 SV=1	1	13	44.5	34.54	321	0	196.87	376170000	7315700	66622000	61582000	103370000	52673000	1.74252	5.22796	3.48544	3104
Q9DAG6		Glipr1l1	tr|Q9DAG6|Q9DAG6_MOUSE Protein Glipr1l1 OS=Mus musculus GN=Glipr1l1 PE=1 SV=1	1	3	14	27.074	236	0.00028121	6.2475	14236000	775180	1824000	3695200	3966600	3526400	1.73601	1.00684	-0.729166	4369
Q99KJ8	Dynactin subunit 2	Dctn2	sp|Q99KJ8|DCTN2_MOUSE Dynactin subunit 2 OS=Mus musculus GN=Dctn2 PE=1 SV=3	1	21	55.2	44.116	402	0	232.12	120880000	8105900	7828300	26313000	24812000	23558000	1.73105	3.74586	2.01482	3739
Q9DD18	D-tyrosyl-tRNA(Tyr) deacylase 1	Dtd1	sp|Q9DD18|DTD1_MOUSE D-tyrosyl-tRNA(Tyr) deacylase 1 OS=Mus musculus GN=Dtd1 PE=1 SV=2	1	3	20.6	23.384	209	0	41.201	5455200	0	1384800	992590	1551400	557990	1.72854	-0.963356	-2.69189	4476
P16125	L-lactate dehydrogenase B chain	Ldhb	sp|P16125|LDHB_MOUSE L-lactate dehydrogenase B chain OS=Mus musculus GN=Ldhb PE=1 SV=2	1	17	42.8	36.572	334	0	323.31	414000000	6292200	88220000	83528000	89116000	52987000	1.72677	5.30605	3.57928	836
Q5DTZ0	Protein NYNRIN	Nynrin	sp|Q5DTZ0|NYNRI_MOUSE Protein NYNRIN OS=Mus musculus GN=Nynrin PE=2 SV=2	1	7	5.1	203.07	1840	0	7.5334	730790	0	32395	131630	163820	181260	1.72562	-3.55678	-5.2824	1869
P16045	Galectin-1	Lgals1	sp|P16045|LEG1_MOUSE Galectin-1 OS=Mus musculus GN=Lgals1 PE=1 SV=3	1	7	54.1	14.866	135	0	44.194	70204000	1435700	12814000	12626000	22142000	8478000	1.72483	2.84651	1.12168	835
Q8VCX1	3-oxo-5-beta-steroid 4-dehydrogenase	Akr1d1	sp|Q8VCX1|AK1D1_MOUSE 3-oxo-5-beta-steroid 4-dehydrogenase OS=Mus musculus GN=Akr1d1 PE=1 SV=1	1	1	2.8	37.289	325	0.0031167	2.572	19616000	95402	4962200	866020	4423600	2544600	1.72309	0.204637	-1.51845	3404
Q5EBG8	Uncharacterized protein C1orf50 homolog		sp|Q5EBG8|CA050_MOUSE Uncharacterized protein C1orf50 homolog OS=Mus musculus PE=1 SV=1	1	2	13.6	21.862	199	0.0029286	2.6945	1401800	0	171840	308520	407500	172900	1.72292	-2.73164	-4.45455	1871
Q9WUK2	Eukaryotic translation initiation factor 4H	Eif4h	sp|Q9WUK2|IF4H_MOUSE Eukaryotic translation initiation factor 4H OS=Mus musculus GN=Eif4h PE=1 SV=3	1	5	23.8	27.341	248	0	117.98	45917000	623070	12999000	8280400	14383000	5779700	1.72204	2.25192	0.529877	4825
Q9JHW2	Omega-amidase NIT2	Nit2	sp|Q9JHW2|NIT2_MOUSE Omega-amidase NIT2 OS=Mus musculus GN=Nit2 PE=1 SV=1	1	5	17.4	30.501	276	0	16.366	4759300	0	906160	1227700	1129800	573830	1.71993	-1.00017	-2.7201	4570
Q62000	Mimecan	Ogn	sp|Q62000|MIME_MOUSE Mimecan OS=Mus musculus GN=Ogn PE=1 SV=1	1	3	9.1	34.012	298	0.0020737	2.9073	2911000	0	447290	551810	848480	516530	1.71706	-1.57303	-3.29009	2068
Q9CPT4	Myeloid-derived growth factor	Mydgf	sp|Q9CPT4|MYDGF_MOUSE Myeloid-derived growth factor OS=Mus musculus GN=Mydgf PE=1 SV=1	1	4	28.3	17.982	166	0	8.3105	17983000	251440	4058400	2594100	4341000	2692100	1.71468	0.750257	-0.964421	3848
F7BCN0;Q8K4M5	COMM domain-containing protein 1	Gm28048;Commd1	tr|F7BCN0|F7BCN0_MOUSE Protein Gm28048 (Fragment) OS=Mus musculus GN=Gm28048 PE=4 SV=1;sp|Q8K4M5|COMD1_MOUSE COMM domain-containing protein 1 OS=Mus musculus GN=Commd1 PE=1 SV=2	2	2	15.2	11.083	99	0.001629	3.0645	7090600	0	2910200	1146900	2541900	491570	1.71388	-0.717369	-2.43125	380
Q9R1P3	Proteasome subunit beta type-2	Psmb2	sp|Q9R1P3|PSB2_MOUSE Proteasome subunit beta type-2 OS=Mus musculus GN=Psmb2 PE=1 SV=1	1	7	42.3	22.906	201	0	109.9	110890000	2112000	22031000	23204000	26661000	14931000	1.70964	3.50066	1.79102	4784
P51855	Glutathione synthetase	Gss	sp|P51855|GSHB_MOUSE Glutathione synthetase OS=Mus musculus GN=Gss PE=1 SV=1	1	3	5.5	52.246	474	0.0018523	2.9692	2029300	0	111100	298580	397640	59800	1.70696	-3.26974	-4.97669	1126
Q9DAM7	Transmembrane protein 263	Tmem263	sp|Q9DAM7|TM263_MOUSE Transmembrane protein 263 OS=Mus musculus GN=Tmem263 PE=1 SV=1	1	8	84.3	11.549	115	0	193.47	666650000	9194400	52947000	40901000	204390000	37051000	1.70523	5.18982	3.4846	4384
Q80W54	CAAX prenyl protease 1 homolog	Zmpste24	sp|Q80W54|FACE1_MOUSE CAAX prenyl protease 1 homolog OS=Mus musculus GN=Zmpste24 PE=1 SV=2	1	2	4.4	54.734	475	0.0095773	1.9291	1677300	400390	0	454340	290330	407940	1.70409	-2.29573	-3.99981	2553
Q9D548		Zcchc13	tr|Q9D548|Q9D548_MOUSE Cellular nucleic acid binding protein 2 OS=Mus musculus GN=Zcchc13 PE=1 SV=1	1	2	10	18.943	170	0	23.117	2497100	0	550940	363150	898570	368440	1.70067	-1.90913	-3.60979	4223
Q9CRC9	Glucosamine-6-phosphate isomerase 2	Gnpda2	sp|Q9CRC9|GNPI2_MOUSE Glucosamine-6-phosphate isomerase 2 OS=Mus musculus GN=Gnpda2 PE=1 SV=1	1	4	18.8	31.083	276	0.00027056	5.5056	2659200	143130	249550	531610	607660	595860	1.69982	-1.6828	-3.38262	3971
Q9D0Z3	Transmembrane protein 53	Tmem53	sp|Q9D0Z3|TMM53_MOUSE Transmembrane protein 53 OS=Mus musculus GN=Tmem53 PE=2 SV=1	1	2	9.1	31.588	276	0	19.551	3422100	1030200	0	714520	719250	864860	1.69707	-1.28036	-2.97743	4123
A2A9I7	Doublesex- and mab-3-related transcription factor B1	Dmrtb1	sp|A2A9I7|DMRTB_MOUSE Doublesex- and mab-3-related transcription factor B1 OS=Mus musculus GN=Dmrtb1 PE=1 SV=1	1	3	5	38.423	359	0.00050188	4.2409	5815200	124920	1222300	1555900	993540	1091700	1.69594	-0.638748	-2.33468	59
Q80W93	Hydrocephalus-inducing protein	Hydin	sp|Q80W93|HYDIN_MOUSE Hydrocephalus-inducing protein OS=Mus musculus GN=Hydin PE=1 SV=2	1	7	1.4	581.52	5154	0.00026123	4.8858	3836400	81946	55777	112480	1853300	41454	1.69046	-3.17524	-4.86571	2554
Q8R0F5	RNA-binding motif protein, X-linked 2	Rbmx2	sp|Q8R0F5|RBMX2_MOUSE RNA-binding motif protein, X-linked 2 OS=Mus musculus GN=Rbmx2 PE=1 SV=1	1	2	8.3	37.535	326	0	11.816	1052800	0	65712	141900	269560	223260	1.68495	-3.18093	-4.86589	3278
Q60864	Stress-induced-phosphoprotein 1	Stip1	sp|Q60864|STIP1_MOUSE Stress-induced-phosphoprotein 1 OS=Mus musculus GN=Stip1 PE=1 SV=1	1	28	49.7	62.581	543	0	174.75	99093000	2845900	14229000	20842000	25830000	13220000	1.68447	3.37528	1.6908	1969
P36536	GTP-binding protein SAR1a	Sar1a	sp|P36536|SAR1A_MOUSE GTP-binding protein SAR1a OS=Mus musculus GN=Sar1a PE=1 SV=1	1	5	27.3	22.371	198	0.00050942	4.4534	15374000	1803100	754210	2415000	5510500	3268500	1.68113	0.923871	-0.757262	1006
Q61845	Meiosis-expressed gene 1 protein	Meig1	sp|Q61845|MEIG1_MOUSE Meiosis-expressed gene 1 protein OS=Mus musculus GN=Meig1 PE=1 SV=1	1	5	54.5	10.823	88	0	47.4	85795000	1430400	16481000	13474000	22022000	10459000	1.67559	2.97614	1.30055	2060
O08677;Q6S9I3	Kininogen-1;Kininogen-1 heavy chain;Bradykinin;Kininogen-1 light chain	Kng1	sp|O08677|KNG1_MOUSE Kininogen-1 OS=Mus musculus GN=Kng1 PE=1 SV=1	2	6	11	73.101	661	0	9.5466	5958700	163190	850310	1215500	1357900	843660	1.67249	-0.731188	-2.40368	448
Q8K183	Pyridoxal kinase	Pdxk	sp|Q8K183|PDXK_MOUSE Pyridoxal kinase OS=Mus musculus GN=Pdxk PE=1 SV=1	1	7	27.9	35.015	312	0	27.879	25599000	566940	4260400	5175700	5086200	3831400	1.67122	1.32833	-0.342892	3175
P16460;J3QNG0	Argininosuccinate synthase	Ass1;Gm5424	sp|P16460|ASSY_MOUSE Argininosuccinate synthase OS=Mus musculus GN=Ass1 PE=1 SV=1;tr|J3QNG0|J3QNG0_MOUSE MCG15755 OS=Mus musculus GN=Gm5424 PE=3 SV=1	2	15	30.8	46.584	412	0	115.02	49828000	896020	7895200	11764000	10209000	4195200	1.6696	2.10186	0.432268	839
Q9CR30	Josephin-2	Josd2	sp|Q9CR30|JOS2_MOUSE Josephin-2 OS=Mus musculus GN=Josd2 PE=1 SV=1	1	2	11.7	20.776	188	0.0018471	2.9442	1461600	280900	0	258420	580640	165220	1.66654	-2.66842	-4.33496	3953
Q78ZA7	Nucleosome assembly protein 1-like 4	Nap1l4	sp|Q78ZA7|NP1L4_MOUSE Nucleosome assembly protein 1-like 4 OS=Mus musculus GN=Nap1l4 PE=1 SV=1	1	9	25.3	42.679	375	0	138.28	67724000	1486400	12342000	16306000	12310000	10332000	1.66266	2.78231	1.11964	2429
Q3U155	Coiled-coil domain-containing protein 174	Ccdc174	sp|Q3U155|CC174_MOUSE Coiled-coil domain-containing protein 174 OS=Mus musculus GN=Ccdc174 PE=2 SV=1	1	3	7.5	53.941	467	0.0030851	2.4731	1604100	98731	166390	551530	629040	158410	1.65729	-2.28558	-3.94288	1679
Q91ZJ5	UTP--glucose-1-phosphate uridylyltransferase	Ugp2	sp|Q91ZJ5|UGPA_MOUSE UTP--glucose-1-phosphate uridylyltransferase OS=Mus musculus GN=Ugp2 PE=1 SV=3	1	11	23.4	56.979	508	0	53.179	15782000	273770	2943000	3365500	3662200	1515700	1.65229	0.517432	-1.13486	3603
Q6DVA0	LEM domain-containing protein 2	Lemd2	sp|Q6DVA0|LEMD2_MOUSE LEM domain-containing protein 2 OS=Mus musculus GN=Lemd2 PE=1 SV=1	1	1	2.5	57.506	511	0.0043337	2.2902	480580	0	0	105740	151160	223690	1.64831	-3.59964	-5.24794	2209
P28656	Nucleosome assembly protein 1-like 1	Nap1l1	sp|P28656|NP1L1_MOUSE Nucleosome assembly protein 1-like 1 OS=Mus musculus GN=Nap1l1 PE=1 SV=2	1	9	21.2	45.345	391	0	74.795	63744000	1450000	12061000	16257000	12761000	9026900	1.64808	2.73322	1.08514	942
Q9CXI5	Mesencephalic astrocyte-derived neurotrophic factor	Manf	sp|Q9CXI5|MANF_MOUSE Mesencephalic astrocyte-derived neurotrophic factor OS=Mus musculus GN=Manf PE=1 SV=1	1	6	27.9	20.373	179	0	109.75	107710000	2050700	23818000	16866000	27801000	18569000	1.64621	3.47224	1.82603	4024
Q8CDN6	Thioredoxin-like protein 1	Txnl1	sp|Q8CDN6|TXNL1_MOUSE Thioredoxin-like protein 1 OS=Mus musculus GN=Txnl1 PE=1 SV=3	1	8	35.3	32.237	289	0	87.307	33510000	1127900	5143000	7203800	9058900	5396200	1.6405	1.92961	0.289104	3047
P70670	Nascent polypeptide-associated complex subunit alpha, muscle-specific form	Naca	sp|P70670|NACAM_MOUSE Nascent polypeptide-associated complex subunit alpha, muscle-specific form OS=Mus musculus GN=Naca PE=1 SV=2	1	5	3.2	220.5	2187	0	306.94	16783000	398660	3469600	3107800	3496100	3769500	1.63995	0.89493	-0.745021	1417
P48774	Glutathione S-transferase Mu 5	Gstm5	sp|P48774|GSTM5_MOUSE Glutathione S-transferase Mu 5 OS=Mus musculus GN=Gstm5 PE=1 SV=1	1	17	64.3	26.635	224	0	188.66	409350000	12286000	63592000	86606000	113490000	55804000	1.63879	5.46463	3.82584	1089
P0C8K7	Small integral membrane protein 1	Smim1	sp|P0C8K7|SMIM1_MOUSE Small integral membrane protein 1 OS=Mus musculus GN=Smim1 PE=1 SV=1	1	1	15.4	8.764	78	0.0027162	2.7373	3649600	1441100	0	417130	877030	459300	1.63687	-1.74815	-3.38502	772
P50247	Adenosylhomocysteinase	Ahcy	sp|P50247|SAHH_MOUSE Adenosylhomocysteinase OS=Mus musculus GN=Ahcy PE=1 SV=3	1	24	50.9	47.688	432	0	103.3	125750000	4270400	16633000	28846000	28412000	18246000	1.63618	3.73234	2.09615	1108
Q5SUR0	Phosphoribosylformylglycinamidine synthase	Pfas	sp|Q5SUR0|PUR4_MOUSE Phosphoribosylformylglycinamidine synthase OS=Mus musculus GN=Pfas PE=1 SV=1	1	9	8.6	144.63	1337	0	22.641	2862200	88424	410050	628120	711440	385710	1.63589	-1.7359	-3.37179	1914
Q8BUK6	Protein Hook homolog 3	Hook3	sp|Q8BUK6|HOOK3_MOUSE Protein Hook homolog 3 OS=Mus musculus GN=Hook3 PE=1 SV=2	1	11	19.1	83.217	718	0	35.245	6132100	531550	352210	1183800	1074900	1554600	1.62528	-0.562351	-2.18763	2838
Q04207	Transcription factor p65	Rela	sp|Q04207|TF65_MOUSE Transcription factor p65 OS=Mus musculus GN=Rela PE=1 SV=1	1	3	7.1	60.211	549	0.00093523	3.1352	1008800	130000	0	264240	247070	106550	1.61626	-3.27957	-4.89583	1536
Q923D2	Flavin reductase (NADPH)	Blvrb	sp|Q923D2|BLVRB_MOUSE Flavin reductase (NADPH) OS=Mus musculus GN=Blvrb PE=1 SV=3	1	4	21.4	22.197	206	0	72.895	22996000	903850	2957500	4713800	7557200	2911600	1.61153	1.34178	-0.269753	3673
Q8VDG5	Phosphopantothenate--cysteine ligase	Ppcs	sp|Q8VDG5|PPCS_MOUSE Phosphopantothenate--cysteine ligase OS=Mus musculus GN=Ppcs PE=1 SV=1	1	5	12.2	33.794	311	0.00027533	5.773	4932900	200570	636870	937880	1411100	816930	1.61052	-0.852881	-2.4634	3416
O09061	Proteasome subunit beta type-1	Psmb1	sp|O09061|PSB1_MOUSE Proteasome subunit beta type-1 OS=Mus musculus GN=Psmb1 PE=1 SV=1	1	9	50.8	26.372	240	0	172.25	129420000	2212200	30743000	24056000	31964000	17270000	1.61041	3.67523	2.06481	472
P50431	Serine hydroxymethyltransferase, cytosolic	Shmt1	sp|P50431|GLYC_MOUSE Serine hydroxymethyltransferase, cytosolic OS=Mus musculus GN=Shmt1 PE=1 SV=3	1	11	22.2	52.6	478	0	34.68	16357000	479480	2501400	3732600	3838000	2170200	1.61026	0.76238	-0.847881	1112
O35682	Myeloid-associated differentiation marker	Myadm	sp|O35682|MYADM_MOUSE Myeloid-associated differentiation marker OS=Mus musculus GN=Myadm PE=1 SV=2	1	1	5.3	35.284	320	0	7.5265	488360	0	0	187100	0	301260	1.60839	-3.93773	-5.54613	530
Q8BFS6	Serine/threonine-protein phosphatase CPPED1	Cpped1	sp|Q8BFS6|CPPED_MOUSE Serine/threonine-protein phosphatase CPPED1 OS=Mus musculus GN=Cpped1 PE=1 SV=1	1	1	3.5	35.247	312	0.0027341	2.7926	674020	0	0	674020	0	0	1.59883	-3.61243	-5.21126	2633
Q99L02	PAXIP1-associated glutamate-rich protein 1A	Pagr1a	sp|Q99L02|PGR1A_MOUSE PAXIP1-associated glutamate-rich protein 1A OS=Mus musculus GN=Pagr1a PE=1 SV=1	1	1	7.5	27.723	253	0.0031063	2.5499	637420	99901	0	0	158900	247120	1.59545	-3.33517	-4.93062	3752
P07356;REV__Q8BND4	Annexin A2	Anxa2	sp|P07356|ANXA2_MOUSE Annexin A2 OS=Mus musculus GN=Anxa2 PE=1 SV=2	2	23	57.8	38.676	339	0	277.2	127310000	4463000	18009000	22493000	37962000	19063000	1.58781	3.77312	2.18531	741
O54782	Epididymis-specific alpha-mannosidase	Man2b2	sp|O54782|MA2B2_MOUSE Epididymis-specific alpha-mannosidase OS=Mus musculus GN=Man2b2 PE=1 SV=2	1	2	2.5	115.61	1018	0.0027329	2.7881	286700	0	0	129140	47741	48683	1.58023	-4.79109	-6.37133	547
Q91WG2	Rab GTPase-binding effector protein 2	Rabep2	sp|Q91WG2|RABE2_MOUSE Rab GTPase-binding effector protein 2 OS=Mus musculus GN=Rabep2 PE=1 SV=3	1	4	7	62.132	554	0.0030837	2.4711	531400	48116	0	121360	187300	174630	1.57447	-3.54935	-5.12382	3538
P97411	Islet cell autoantigen 1	Ica1	sp|P97411|ICA69_MOUSE Islet cell autoantigen 1 OS=Mus musculus GN=Ica1 PE=1 SV=3	1	3	5.6	54.324	478	0.0049293	2.1983	45429	45429	0	0	0	0	1.57211	-4.6192	-6.19131	1465
Q3UQI9	Protein FAM188B	Fam188b	sp|Q3UQI9|F188B_MOUSE Protein FAM188B OS=Mus musculus GN=Fam188b PE=1 SV=1	1	15	30.9	82.936	744	0	88.775	12762000	496890	1368500	2460800	5789800	859390	1.57149	0.314268	-1.25722	1773
Q9R0H0	Peroxisomal acyl-coenzyme A oxidase 1	Acox1	sp|Q9R0H0|ACOX1_MOUSE Peroxisomal acyl-coenzyme A oxidase 1 OS=Mus musculus GN=Acox1 PE=1 SV=5	1	4	5.9	74.648	661	0.00093919	3.1804	916320	117230	0	443900	132190	118010	1.56986	-3.28175	-4.85161	4758
Q60854;W4VSP4	Serpin B6	Serpinb6	sp|Q60854|SPB6_MOUSE Serpin B6 OS=Mus musculus GN=Serpinb6 PE=1 SV=1	2	9	28	42.598	378	0	74.322	45111000	1664300	5965400	9113000	11005000	6761000	1.56793	2.24468	0.676747	1967
P68181	cAMP-dependent protein kinase catalytic subunit beta	Prkacb	sp|P68181|KAPCB_MOUSE cAMP-dependent protein kinase catalytic subunit beta OS=Mus musculus GN=Prkacb PE=1 SV=2	1	9	22.8	40.707	351	0.00027122	5.5662	3511500	82200	651300	406920	944430	684270	1.55793	-1.53275	-3.09068	1378
Q0P5Y3	Tubulin polymerization-promoting protein family member 2	Tppp2	sp|Q0P5Y3|TPPP2_MOUSE Tubulin polymerization-promoting protein family member 2 OS=Mus musculus GN=Tppp2 PE=2 SV=1	1	5	37.6	18.681	170	0	34.099	31328000	948580	5859600	6642400	7950800	5223300	1.55388	1.81218	0.258301	1578
O55023	Inositol monophosphatase 1	Impa1	sp|O55023|IMPA1_MOUSE Inositol monophosphatase 1 OS=Mus musculus GN=Impa1 PE=1 SV=1	1	9	31.8	30.436	277	0	86.097	56953000	1084700	12492000	9834100	11990000	8839000	1.55031	2.4514	0.901093	568
Q61233;Q99K51	Plastin-2	Lcp1	sp|Q61233|PLSL_MOUSE Plastin-2 OS=Mus musculus GN=Lcp1 PE=1 SV=4	2	4	7.3	70.148	627	0.0027186	2.7425	688580	0	82595	118280	229010	86471	1.54873	-3.80303	-5.35176	2015
Q9QZB7	Actin-related protein 10	Actr10	sp|Q9QZB7|ARP10_MOUSE Actin-related protein 10 OS=Mus musculus GN=Actr10 PE=1 SV=2	1	7	20.1	46.207	417	0	11.656	8275000	621600	582140	1880100	2067900	1165600	1.54855	-0.163725	-1.71227	4734
Q9CQZ1	Heat shock factor-binding protein 1	Hsbp1	sp|Q9CQZ1|HSBP1_MOUSE Heat shock factor-binding protein 1 OS=Mus musculus GN=Hsbp1 PE=1 SV=1	1	2	47.4	8.6107	76	0.000499	4.1126	12502000	0	4315200	414080	6727400	610300	1.54663	-0.635201	-2.18183	3943
Q80ZQ9	Protein Simiate	Fam206a	sp|Q80ZQ9|F206A_MOUSE Protein Simiate OS=Mus musculus GN=Fam206a PE=1 SV=2	1	2	16.6	21.597	193	0.0005034	4.2831	3734400	0	1355000	395140	856440	544470	1.54612	-1.70381	-3.24993	2612
Q9D9U4	Testis-expressed sequence 22 protein	Tex22	sp|Q9D9U4|TEX22_MOUSE Testis-expressed sequence 22 protein OS=Mus musculus GN=Tex22 PE=1 SV=1	1	4	20.1	21.501	189	0	16.241	20731000	1157200	2347800	3857200	4776500	5025000	1.54518	1.28714	-0.258047	4344
E9Q555	E3 ubiquitin-protein ligase RNF213	Rnf213	sp|E9Q555|RN213_MOUSE E3 ubiquitin-protein ligase RNF213 OS=Mus musculus GN=Rnf213 PE=1 SV=2	1	26	5.9	584.78	5152	0	30.948	2706500	159490	324150	347790	595230	1162800	1.54062	-1.57527	-3.11589	328
Q8BZW8	NHL repeat-containing protein 2	Nhlrc2	sp|Q8BZW8|NHLC2_MOUSE NHL repeat-containing protein 2 OS=Mus musculus GN=Nhlrc2 PE=1 SV=1	1	2	3.3	78.429	725	0.00072798	3.6846	635430	69021	0	130500	171820	104900	1.54026	-3.80101	-5.34128	2904
P19157;P46425;F6RWR5	Glutathione S-transferase P 1;Glutathione S-transferase P 2	Gstp1;Gstp2	sp|P19157|GSTP1_MOUSE Glutathione S-transferase P 1 OS=Mus musculus GN=Gstp1 PE=1 SV=2;sp|P46425|GSTP2_MOUSE Glutathione S-transferase P 2 OS=Mus musculus GN=Gstp2 PE=1 SV=2	3	7	46.2	23.609	210	0	198.53	204320000	4965800	36897000	42090000	51228000	23509000	1.53969	4.3194	2.77971	867
Q99JY9;Q641P0	Actin-related protein 3	Actr3	sp|Q99JY9|ARP3_MOUSE Actin-related protein 3 OS=Mus musculus GN=Actr3 PE=1 SV=3	2	9	21.5	47.357	418	0	18.704	10719000	282350	2126900	2010200	2134500	2215900	1.5395	0.192636	-1.34687	3722
Q6PIP5	NudC domain-containing protein 1	Nudcd1	sp|Q6PIP5|NUDC1_MOUSE NudC domain-containing protein 1 OS=Mus musculus GN=Nudcd1 PE=1 SV=2	1	2	3.4	66.704	582	0.0009508	3.3468	812220	0	0	238180	322370	94100	1.53873	-3.26132	-4.80005	2350
Q9ERG0	LIM domain and actin-binding protein 1	Lima1	sp|Q9ERG0|LIMA1_MOUSE LIM domain and actin-binding protein 1 OS=Mus musculus GN=Lima1 PE=1 SV=3	1	5	7.6	84.059	753	0.0002681	5.3367	1082300	242370	20896	85827	404830	209200	1.53326	-3.25843	-4.79169	4524
Q505B7	Protein archease	Zbtb8os	sp|Q505B7|ARCH_MOUSE Protein archease OS=Mus musculus GN=Zbtb8os PE=1 SV=2	1	2	10.1	19.727	168	0	7.0499	3431500	0	573030	440440	981010	471180	1.53141	-1.65584	-3.18725	1849
Q921R8	Solute carrier family 41 member 3	Slc41a3	sp|Q921R8|S41A3_MOUSE Solute carrier family 41 member 3 OS=Mus musculus GN=Slc41a3 PE=1 SV=1	1	1	2.7	53.257	488	0	6.729	795750	201980	0	191160	185660	216960	1.52862	-3.23071	-4.75933	3640
Q9WTP6	Adenylate kinase 2, mitochondrial;Adenylate kinase 2, mitochondrial, N-terminally processed	Ak2	sp|Q9WTP6|KAD2_MOUSE Adenylate kinase 2, mitochondrial OS=Mus musculus GN=Ak2 PE=1 SV=5	1	2	11.3	26.468	239	0.00073439	3.841	4479600	114490	1050200	672650	1284700	960240	1.52691	-0.980132	-2.50704	4803
P62774	Myotrophin	Mtpn	sp|P62774|MTPN_MOUSE Myotrophin OS=Mus musculus GN=Mtpn PE=1 SV=2	1	3	33.9	12.861	118	0	98.1	35189000	814510	7646000	4672900	10578000	6229300	1.52472	1.86505	0.340334	1316
P58044	Isopentenyl-diphosphate Delta-isomerase 1	Idi1	sp|P58044|IDI1_MOUSE Isopentenyl-diphosphate Delta-isomerase 1 OS=Mus musculus GN=Idi1 PE=1 SV=1	1	6	24.2	26.289	227	0	39.253	49111000	1086300	10748000	9783100	12082000	6681500	1.52432	2.31801	0.793689	1200
Q8C878	NEDD8-activating enzyme E1 catalytic subunit	Uba3	sp|Q8C878|UBA3_MOUSE NEDD8-activating enzyme E1 catalytic subunit OS=Mus musculus GN=Uba3 PE=1 SV=2	1	8	21.6	51.737	462	0	31.268	9898000	236020	1609400	1752400	2545300	1035800	1.52283	-0.154437	-1.67727	3005
Q9DCT1	1,5-anhydro-D-fructose reductase	Akr1e2	sp|Q9DCT1|AKCL2_MOUSE 1,5-anhydro-D-fructose reductase OS=Mus musculus GN=Akr1e2 PE=1 SV=1	1	3	11	34.46	301	0	10.125	5530100	196570	781920	1080200	1301800	844810	1.52234	-0.807572	-2.32992	4473
Q9EPK6	Nucleotide exchange factor SIL1	Sil1	sp|Q9EPK6|SIL1_MOUSE Nucleotide exchange factor SIL1 OS=Mus musculus GN=Sil1 PE=1 SV=2	1	6	15.9	52.429	465	0	22.583	6240800	308900	938170	1847200	1251300	1322300	1.51932	-0.353136	-1.87245	4485
O55234	Proteasome subunit beta type-5	Psmb5	sp|O55234|PSB5_MOUSE Proteasome subunit beta type-5 OS=Mus musculus GN=Psmb5 PE=1 SV=3	1	10	37.5	28.532	264	0	180.41	157020000	3105700	36386000	26626000	42456000	20713000	1.51687	3.94797	2.43109	589
A0A0A6YVU8;Q9JKV1	Proteasomal ubiquitin receptor ADRM1	Gm9774;Adrm1	tr|A0A0A6YVU8|A0A0A6YVU8_MOUSE MCG119397 OS=Mus musculus GN=Gm9774 PE=4 SV=1;sp|Q9JKV1|ADRM1_MOUSE Proteasomal ubiquitin receptor ADRM1 OS=Mus musculus GN=Adrm1 PE=1 SV=2	2	2	7.6	42.147	407	0	51.835	8619900	136570	2410600	1071400	2167500	1581100	1.51555	-0.264922	-1.78047	21
P24547;P50096	Inosine-5-monophosphate dehydrogenase 2	Impdh2	sp|P24547|IMDH2_MOUSE Inosine-5-monophosphate dehydrogenase 2 OS=Mus musculus GN=Impdh2 PE=1 SV=2	2	10	23.2	55.814	514	0	27.385	10947000	295450	2212500	2120700	3161800	1523500	1.51284	0.227151	-1.28569	909
Q8JZV7	Putative N-acetylglucosamine-6-phosphate deacetylase	Amdhd2	sp|Q8JZV7|NAGA_MOUSE N-acetylglucosamine-6-phosphate deacetylase OS=Mus musculus GN=Amdhd2 PE=1 SV=1	1	4	11.5	43.5	409	0	7.7429	4509300	0	788670	575170	1420400	492590	1.51126	-1.32813	-2.83939	3148
Q61554	Fibrillin-1	Fbn1	sp|Q61554|FBN1_MOUSE Fibrillin-1 OS=Mus musculus GN=Fbn1 PE=1 SV=1	1	11	4.2	312.26	2871	0	12.346	663900	262350	7410.3	97534	89873	187910	1.51002	-3.97234	-5.48236	2040
Q8VCA8	Secernin-2	Scrn2	sp|Q8VCA8|SCRN2_MOUSE Secernin-2 OS=Mus musculus GN=Scrn2 PE=1 SV=1	1	4	16.2	46.6	425	0.00028345	6.4588	3255900	0	608870	744200	891640	407080	1.50915	-1.51985	-3.029	3386
O08553	Dihydropyrimidinase-related protein 2	Dpysl2	sp|O08553|DPYL2_MOUSE Dihydropyrimidinase-related protein 2 OS=Mus musculus GN=Dpysl2 PE=1 SV=2	1	16	38.6	62.277	572	0	141.53	19408000	1080900	1969100	3452700	5540200	3100200	1.50707	1.07293	-0.434135	438
Q9Z2W0	Aspartyl aminopeptidase	Dnpep	sp|Q9Z2W0|DNPEP_MOUSE Aspartyl aminopeptidase OS=Mus musculus GN=Dnpep PE=1 SV=2	1	19	44.2	52.206	473	0	242.87	286020000	8201200	50442000	59571000	61267000	42813000	1.4936	4.86078	3.36717	4942
Q8R1Q9	Ribokinase	Rbks	sp|Q8R1Q9|RBSK_MOUSE Ribokinase OS=Mus musculus GN=Rbks PE=1 SV=1	1	1	5.3	34.119	323	0.0039173	2.3427	495180	0	95833	131200	157060	111080	1.49187	-3.81411	-5.30598	3305
P63158	High mobility group protein B1	Hmgb1	sp|P63158|HMGB1_MOUSE High mobility group protein B1 OS=Mus musculus GN=Hmgb1 PE=1 SV=2	1	7	22.8	24.893	215	0	54.441	218840000	3549400	60248000	46525000	45196000	27490000	1.49137	4.38256	2.89119	1361
P63002	Amino-terminal enhancer of split	Aes	sp|P63002|AES_MOUSE Amino-terminal enhancer of split OS=Mus musculus GN=Aes PE=1 SV=1	1	2	14.2	22	197	0.00072133	3.5213	3134700	902190	0	0	1182000	743690	1.49051	-2.11967	-3.61018	1347
Q9DA60	Uncharacterized protein C2orf57 homolog		sp|Q9DA60|CB057_MOUSE Uncharacterized protein C2orf57 homolog OS=Mus musculus PE=2 SV=2	1	2	4.9	56.574	530	0.000508	4.4158	686220	0	0	196430	240370	155560	1.48812	-3.25342	-4.74154	4357
Q61838;Q6GQT1	Alpha-2-macroglobulin;Alpha-2-macroglobulin 165 kDa subunit;Alpha-2-macroglobulin 35 kDa subunit	A2m	sp|Q61838|PZP_MOUSE Pregnancy zone protein OS=Mus musculus GN=Pzp PE=1 SV=3	2	16	10.8	165.85	1495	0	16.316	5983000	132900	1206200	1085600	1115200	970190	1.48655	-0.81303	-2.29958	2059
P00493	Hypoxanthine-guanine phosphoribosyltransferase	Hprt1	sp|P00493|HPRT_MOUSE Hypoxanthine-guanine phosphoribosyltransferase OS=Mus musculus GN=Hprt1 PE=1 SV=3	1	8	44	24.57	218	0	45.644	44716000	863010	11140000	7828100	10920000	6334600	1.48299	2.13653	0.653543	691
O08795	Glucosidase 2 subunit beta	Prkcsh	sp|O08795|GLU2B_MOUSE Glucosidase 2 subunit beta OS=Mus musculus GN=Prkcsh PE=1 SV=1	1	11	18.4	58.792	521	0	33.59	15195000	1056400	1658900	4047700	3996100	2583200	1.47887	0.904544	-0.574329	458
Q80X90	Filamin-B	Flnb	sp|Q80X90|FLNB_MOUSE Filamin-B OS=Mus musculus GN=Flnb PE=1 SV=3	1	17	8.1	277.82	2602	0	9.9958	983040	49701	122260	225080	252010	150050	1.47775	-3.18255	-4.6603	2570
P14211	Calreticulin	Calr	sp|P14211|CALR_MOUSE Calreticulin OS=Mus musculus GN=Calr PE=1 SV=1	1	17	41.8	47.994	416	0	323.31	241720000	9702200	39316000	64581000	51189000	40081000	1.47282	4.78147	3.30866	819
Q00612	Glucose-6-phosphate 1-dehydrogenase X	G6pdx	sp|Q00612|G6PD1_MOUSE Glucose-6-phosphate 1-dehydrogenase X OS=Mus musculus GN=G6pdx PE=1 SV=3	1	6	10.7	59.262	515	0.0002613	4.8867	2996500	75168	595860	558540	818580	364030	1.46664	-1.75272	-3.21937	1510
Q9Z0S1	3(2),5-bisphosphate nucleotidase 1	Bpnt1	sp|Q9Z0S1|BPNT1_MOUSE 3(2),5-bisphosphate nucleotidase 1 OS=Mus musculus GN=Bpnt1 PE=1 SV=2	1	7	24.7	33.196	308	0	36.941	29494000	506460	6701500	4930200	7297100	3042800	1.46523	1.36772	-0.0975189	4879
Q2TBA3	Mucosa-associated lymphoid tissue lymphoma translocation protein 1 homolog	Malt1	sp|Q2TBA3|MALT1_MOUSE Mucosa-associated lymphoid tissue lymphoma translocation protein 1 homolog OS=Mus musculus GN=Malt1 PE=1 SV=2	1	3	4.1	93.215	832	0.003109	2.5535	5744900	428730	230960	3696900	560130	262740	1.46397	-1.18312	-2.64709	1605
Q9Z2E9	Seipin	Bscl2	sp|Q9Z2E9|BSCL2_MOUSE Seipin OS=Mus musculus GN=Bscl2 PE=1 SV=2	1	2	4.4	43.104	383	0.0039318	2.4026	6335600	1209400	294360	1485800	1553800	1605200	1.46357	-0.260477	-1.72405	4930
P48794	Hyaluronidase PH-20	Spam1	sp|P48794|HYALP_MOUSE Hyaluronidase PH-20 OS=Mus musculus GN=Spam1 PE=1 SV=2	1	5	10.5	58.498	512	0.00026603	5.2204	1793100	294530	94027	474910	363960	456070	1.45406	-2.11211	-3.56617	1091
Q9CQM5	Thioredoxin domain-containing protein 17	Txndc17	sp|Q9CQM5|TXD17_MOUSE Thioredoxin domain-containing protein 17 OS=Mus musculus GN=Txndc17 PE=1 SV=1	1	2	15.4	14.015	123	0.0059587	2.1309	13201000	592750	1798600	2067600	3729300	2433500	1.45239	0.519558	-0.932836	3916
P47968	Ribose-5-phosphate isomerase	Rpia	sp|P47968|RPIA_MOUSE Ribose-5-phosphate isomerase OS=Mus musculus GN=Rpia PE=1 SV=2	1	1	6.3	32.45	303	0.00027739	5.9435	1607400	0	435770	271690	330840	253600	1.44963	-2.70879	-4.15841	1076
Q91WK7	Ankyrin repeat domain-containing protein 54	Ankrd54	sp|Q91WK7|ANR54_MOUSE Ankyrin repeat domain-containing protein 54 OS=Mus musculus GN=Ankrd54 PE=1 SV=1	1	2	9.4	32.485	299	0.00073242	3.7591	423890	0	0	0	423890	0	1.44631	-3.66485	-5.11116	3544
J3QPY3;Q9WUD8	Fas apoptotic inhibitory molecule 1	Gm6432;Faim	tr|J3QPY3|J3QPY3_MOUSE MCG18104 OS=Mus musculus GN=Faiml PE=4 SV=1;sp|Q9WUD8|FAIM1_MOUSE Fas apoptotic inhibitory molecule 1 OS=Mus musculus GN=Faim PE=1 SV=1	2	1	6.2	20.034	178	0.0081847	1.9824	2293100	130340	235060	352110	665800	383180	1.444	-2.04929	-3.49329	430
Q9DA48	Sperm acrosome membrane-associated protein 1	Spaca1	sp|Q9DA48|SACA1_MOUSE Sperm acrosome membrane-associated protein 1 OS=Mus musculus GN=Spaca1 PE=1 SV=1	1	3	11.8	33.342	305	0.00028209	6.3152	5140500	1075000	194810	1226600	995150	1313800	1.44351	-0.663276	-2.10678	4356
Q3UL36	Arginine and glutamate-rich protein 1	Arglu1	sp|Q3UL36|ARGL1_MOUSE Arginine and glutamate-rich protein 1 OS=Mus musculus GN=Arglu1 PE=1 SV=2	1	6	14.8	32.887	271	0.00026406	5.0571	34287000	1026600	8344400	6512000	12014000	5360700	1.44333	2.01365	0.57032	1752
Q9CZ30	Obg-like ATPase 1	Ola1	sp|Q9CZ30|OLA1_MOUSE Obg-like ATPase 1 OS=Mus musculus GN=Ola1 PE=1 SV=1	1	9	27	44.729	396	0	45.72	17288000	798170	2108700	3427600	4493100	2371600	1.44331	0.839849	-0.603459	4066
B2RUD9		Gm4787	tr|B2RUD9|B2RUD9_MOUSE MCG140564 OS=Mus musculus GN=Gm4787 PE=2 SV=1	1	5	7.6	83.425	748	0	8.8136	2253700	418250	95287	628890	359940	587880	1.44328	-1.86031	-3.30359	165
Q9CR86	Calcium-regulated heat stable protein 1	Carhsp1	sp|Q9CR86|CHSP1_MOUSE Calcium-regulated heat stable protein 1 OS=Mus musculus GN=Carhsp1 PE=1 SV=1	1	3	35.1	16.062	148	0	25.222	45665000	2311300	7225800	10941000	12771000	8149400	1.44207	2.49398	1.05191	3964
Q6ZWZ2	Ubiquitin-conjugating enzyme E2 R2	Ube2r2	sp|Q6ZWZ2|UB2R2_MOUSE Ubiquitin-conjugating enzyme E2 R2 OS=Mus musculus GN=Ube2r2 PE=1 SV=1	1	2	8	27.166	238	0.0053464	2.1736	1484600	0	315790	267210	377320	178800	1.4355	-2.82163	-4.25713	2411
Q02257	Junction plakoglobin	Jup	sp|Q02257|PLAK_MOUSE Junction plakoglobin OS=Mus musculus GN=Jup PE=1 SV=3	1	16	25	81.8	745	0	37.754	4057400	32946	167200	93919	3610900	19647	1.43079	-3.30028	-4.73107	1525
Q9EQM6	Microprocessor complex subunit DGCR8	Dgcr8	sp|Q9EQM6|DGCR8_MOUSE Microprocessor complex subunit DGCR8 OS=Mus musculus GN=Dgcr8 PE=1 SV=2	1	7	8	86.32	773	0	22.44	9268500	453200	1191000	2038500	1960300	1596700	1.42464	0.000817935	-1.42382	4506
E9Q7E2		Arid2	tr|E9Q7E2|E9Q7E2_MOUSE Protein Arid2 OS=Mus musculus GN=Arid2 PE=1 SV=1	1	15	10.4	195.99	1828	0	30.708	148400000	46377000	1956800	19769000	35023000	20034000	1.42329	3.69619	2.2729	345
Q6NSU2		2810408A11Rik	tr|Q6NSU2|Q6NSU2_MOUSE Protein 2810408A11Rik OS=Mus musculus GN=2810408A11Rik PE=1 SV=1	1	4	13.1	46.7	435	0	19.965	8978900	412890	1611600	1858400	1958100	2383000	1.42122	0.148358	-1.27286	2232
Q99LB6	Methionine adenosyltransferase 2 subunit beta	Mat2b	sp|Q99LB6|MAT2B_MOUSE Methionine adenosyltransferase 2 subunit beta OS=Mus musculus GN=Mat2b PE=1 SV=1	1	3	13.8	37.392	334	0.00050251	4.2615	1903900	0	298420	454520	635780	0	1.41865	-3.1884	-4.60705	3760
P97822	Acidic leucine-rich nuclear phosphoprotein 32 family member E	Anp32e	sp|P97822|AN32E_MOUSE Acidic leucine-rich nuclear phosphoprotein 32 family member E OS=Mus musculus GN=Anp32e PE=1 SV=2	1	2	5.4	29.622	260	0.00072499	3.6092	4683700	262950	464030	1332800	992430	510340	1.41705	-1.0794	-2.49645	1494
Q9JL56	Glycerophosphodiester phosphodiesterase 1	Gde1	sp|Q9JL56|GDE1_MOUSE Glycerophosphodiester phosphodiesterase 1 OS=Mus musculus GN=Gde1 PE=1 SV=1	1	3	10.9	37.629	331	0.0007326	3.7652	2446400	619560	84392	667070	526330	535390	1.41353	-1.6942	-3.10774	4639
Q8K1J6	CCA tRNA nucleotidyltransferase 1, mitochondrial	Trnt1	sp|Q8K1J6|TRNT1_MOUSE CCA tRNA nucleotidyltransferase 1, mitochondrial OS=Mus musculus GN=Trnt1 PE=1 SV=1	1	6	18.4	49.895	434	0	8.5538	4371800	278650	341610	1170100	1407900	280070	1.41315	-1.26239	-2.67555	3184
O09035	Diazepam-binding inhibitor-like 5	Dbil5	sp|O09035|DBIL5_MOUSE Diazepam-binding inhibitor-like 5 OS=Mus musculus GN=Dbil5 PE=1 SV=1	1	3	20.7	9.8645	87	0.00028129	6.266	97001000	3152200	19389000	14589000	28215000	18032000	1.40775	3.39549	1.98774	469
Q9CQH7	Transcription factor BTF3 homolog 4	Btf3l4	sp|Q9CQH7|BT3L4_MOUSE Transcription factor BTF3 homolog 4 OS=Mus musculus GN=Btf3l4 PE=1 SV=1	1	5	41.1	17.27	158	0	17.329	71758000	6578600	5742500	9334400	19893000	19397000	1.40705	3.04776	1.64071	3905
P23492	Purine nucleoside phosphorylase	Pnp	sp|P23492|PNPH_MOUSE Purine nucleoside phosphorylase OS=Mus musculus GN=Pnp PE=1 SV=2	1	7	34.9	32.277	289	0	27.427	6631200	0	1856100	1081000	1705600	715660	1.40622	-0.757077	-2.1633	897
Q62523	Zyxin	Zyx	sp|Q62523|ZYX_MOUSE Zyxin OS=Mus musculus GN=Zyx PE=1 SV=2	1	12	24.3	60.545	564	0	144.77	26125000	1753100	2433100	4467000	7979400	3825600	1.40602	1.47335	0.0673313	2120
Q9D892	Inosine triphosphate pyrophosphatase	Itpa	sp|Q9D892|ITPA_MOUSE Inosine triphosphate pyrophosphatase OS=Mus musculus GN=Itpa PE=1 SV=2	1	8	48.5	21.897	198	0	53.109	117850000	3528100	21115000	20347000	30193000	16032000	1.40099	3.53152	2.13052	4287
P32848	Parvalbumin alpha	Pvalb	sp|P32848|PRVA_MOUSE Parvalbumin alpha OS=Mus musculus GN=Pvalb PE=1 SV=3	1	2	11.8	11.93	110	0.003118	2.5732	30742000	1025000	3742600	3355800	14774000	2320600	1.40083	1.39164	-0.00918865	976
Q8BK06	F-box only protein 9	Fbxo9	sp|Q8BK06|FBX9_MOUSE F-box only protein 9 OS=Mus musculus GN=Fbxo9 PE=1 SV=1	1	3	8.2	50.759	437	0.0045181	2.2255	558220	58191	57116	118310	155930	157520	1.3962	-3.69933	-5.09553	2728
Q05816	Fatty acid-binding protein, epidermal	Fabp5	sp|Q05816|FABP5_MOUSE Fatty acid-binding protein, epidermal OS=Mus musculus GN=Fabp5 PE=1 SV=3	1	4	30.4	15.137	135	0.0005148	4.6222	14539000	451110	2761500	3207400	3161500	2079000	1.39608	0.575561	-0.820519	1545
Q9DD02	Protein Hikeshi	L7rn6	sp|Q9DD02|HIKES_MOUSE Protein Hikeshi OS=Mus musculus GN=L7rn6 PE=1 SV=1	1	2	11.2	21.618	197	0	11.7	5028500	595770	301050	746530	1521500	1011200	1.39477	-0.823796	-2.21857	4475
E9Q035;Q921I1;P47758;CON__Q29443;CON__Q0IIK2	Serotransferrin	Gm20425;Tf	tr|E9Q035|E9Q035_MOUSE Protein Gm20425 OS=Mus musculus GN=Gm20425 PE=4 SV=1;sp|Q921I1|TRFE_MOUSE Serotransferrin OS=Mus musculus GN=Tf PE=1 SV=1	5	41	43.6	107.8	978	0	323.31	126160000	3690500	24762000	26634000	24986000	19839000	1.39452	3.67243	2.27792	302
Q9QYG0	Protein NDRG2	Ndrg2	sp|Q9QYG0|NDRG2_MOUSE Protein NDRG2 OS=Mus musculus GN=Ndrg2 PE=1 SV=1	1	3	10.8	40.789	371	0.0018463	2.9318	779410	0	0	144510	134700	111890	1.38591	-3.838	-5.22391	4713
Q99MD9	Nuclear autoantigenic sperm protein	Nasp	sp|Q99MD9|NASP_MOUSE Nuclear autoantigenic sperm protein OS=Mus musculus GN=Nasp PE=1 SV=2	1	35	49.2	83.953	773	0	323.31	163930000	3993900	35352000	28440000	33162000	26319000	1.3843	3.97604	2.59174	3789
P28665;P28666;A0A0N4SVU1;CON__ENSEMBL:ENSBTAP00000024146	Murinoglobulin-1;Murinoglobulin-2	Mug1;Mug2	sp|P28665|MUG1_MOUSE Murinoglobulin-1 OS=Mus musculus GN=Mug1 PE=1 SV=3;sp|P28666|MUG2_MOUSE Murinoglobulin-2 OS=Mus musculus GN=Mug2 PE=1 SV=2	4	26	22.3	165.3	1476	0	115.35	11141000	185070	2237300	1854300	1689700	1256100	1.38353	-0.231544	-1.61507	946
Q497P3	Nuclear transcriptional regulator 1-like protein	Nupr1l	sp|Q497P3|NUPR2_MOUSE Nuclear protein 2 OS=Mus musculus GN=Nupr2 PE=3 SV=1	1	2	23.5	11.767	102	0.0087884	1.9602	25454000	1210800	4847400	4069900	9199000	5568800	1.37997	1.67754	0.297565	1831
Q91WC0	Histone-lysine N-methyltransferase setd3	Setd3	sp|Q91WC0|SETD3_MOUSE Histone-lysine N-methyltransferase setd3 OS=Mus musculus GN=Setd3 PE=1 SV=1	1	4	7.6	67.175	594	0	10.155	1574700	198410	122680	421670	303500	431970	1.3765	-2.28276	-3.65926	3531
P34884	Macrophage migration inhibitory factor	Mif	sp|P34884|MIF_MOUSE Macrophage migration inhibitory factor OS=Mus musculus GN=Mif PE=1 SV=2	1	4	41.7	12.504	115	0	30.775	140110000	4239700	25345000	20363000	36325000	21881000	1.37561	3.77038	2.39478	983
A3KMP2	Tetratricopeptide repeat protein 38	Ttc38	sp|A3KMP2|TTC38_MOUSE Tetratricopeptide repeat protein 38 OS=Mus musculus GN=Ttc38 PE=1 SV=2	1	1	2.4	52.223	465	0.0018514	2.9651	562080	22391	114080	118640	174480	89953	1.37206	-3.91337	-5.28543	121
G5E895		Akr1b10	tr|G5E895|G5E895_MOUSE MCG142264, isoform CRA_b OS=Mus musculus GN=Akr1b10 PE=1 SV=1	1	7	21.2	35.848	316	0.00073278	3.7669	1611600	69918	181140	271180	447130	168230	1.36832	-2.76221	-4.13053	416
P11031	Activated RNA polymerase II transcriptional coactivator p15	Sub1	sp|P11031|TCP4_MOUSE Activated RNA polymerase II transcriptional coactivator p15 OS=Mus musculus GN=Sub1 PE=1 SV=3	1	4	37	14.427	127	0	19.771	93261000	1199100	29217000	10855000	22413000	12168000	1.36713	2.95345	1.58632	788
Q8BHJ5	F-box-like/WD repeat-containing protein TBL1XR1	Tbl1xr1	sp|Q8BHJ5|TBL1R_MOUSE F-box-like/WD repeat-containing protein TBL1XR1 OS=Mus musculus GN=Tbl1xr1 PE=1 SV=1	1	10	23.2	55.66	514	0	86.319	25038000	2009300	2269000	3978500	8289300	4181400	1.36339	1.47875	0.115354	2696
Q9CQV8	14-3-3 protein beta/alpha;14-3-3 protein beta/alpha, N-terminally processed	Ywhab	sp|Q9CQV8|1433B_MOUSE 14-3-3 protein beta/alpha OS=Mus musculus GN=Ywhab PE=1 SV=3	1	10	45.5	28.086	246	0	168.89	110790000	4685700	18048000	20100000	39682000	13721000	1.36021	3.58221	2.222	3935
P99026	Proteasome subunit beta type-4	Psmb4	sp|P99026|PSB4_MOUSE Proteasome subunit beta type-4 OS=Mus musculus GN=Psmb4 PE=1 SV=1	1	5	24.2	29.116	264	0	83.933	99726000	2177700	23193000	15955000	25707000	12303000	1.35972	3.20991	1.85019	1505
P56375	Acylphosphatase-2	Acyp2	sp|P56375|ACYP2_MOUSE Acylphosphatase-2 OS=Mus musculus GN=Acyp2 PE=1 SV=2	1	1	12.3	11.877	106	0	16.662	2452900	292570	0	195010	633020	269500	1.35646	-2.52697	-3.88343	1180
Q8BMB0	Protein EMSY	Emsy	sp|Q8BMB0|EMSY_MOUSE BRCA2-interacting transcriptional repressor EMSY OS=Mus musculus GN=Emsy PE=1 SV=2	1	5	4.4	135.29	1264	0.00071446	3.3719	1168400	71880	141070	355820	160440	249400	1.35579	-2.93512	-4.29091	2757
Q64105	Sepiapterin reductase	Spr	sp|Q64105|SPRE_MOUSE Sepiapterin reductase OS=Mus musculus GN=Spr PE=1 SV=1	1	4	18	27.883	261	0	12.7	5751100	349870	549260	1129400	1896900	545570	1.3534	-0.815396	-2.16879	2134
Q8K1L5	Protein phosphatase 1 regulatory subunit 11	Ppp1r11	sp|Q8K1L5|PP1RB_MOUSE Protein phosphatase 1 regulatory subunit 11 OS=Mus musculus GN=Ppp1r11 PE=1 SV=1	1	2	12.2	14.544	131	0	31.603	57982000	1197900	16856000	7875900	15206000	10487000	1.35228	2.54111	1.18883	3185
Q9D3W1	Radial spoke head 14 homolog	Rsph14	sp|Q9D3W1|RSP14_MOUSE Radial spoke head 14 homolog OS=Mus musculus GN=Rsph14 PE=2 SV=1	1	3	10	37.809	341	0.00027886	6.058	1774700	195880	112040	262230	506070	335300	1.34683	-2.38713	-3.73396	4188
O89023	Tripeptidyl-peptidase 1	Tpp1	sp|O89023|TPP1_MOUSE Tripeptidyl-peptidase 1 OS=Mus musculus GN=Tpp1 PE=1 SV=2	1	2	3.7	61.341	562	0.00073064	3.7182	5409500	530910	387620	707970	1351600	1329500	1.34476	-0.774636	-2.11939	682
P01029	Complement C4-B;Complement C4 beta chain;Complement C4 alpha chain;C4a anaphylatoxin;Complement C4 gamma chain	C4b	sp|P01029|CO4B_MOUSE Complement C4-B OS=Mus musculus GN=C4b PE=1 SV=3	1	2	1.4	192.91	1738	0.00028066	6.2015	600960	44319	48210	124500	177190	60342	1.33947	-4.07478	-5.41425	695
Q8C5W0	Calmin	Clmn	sp|Q8C5W0|CLMN_MOUSE Calmin OS=Mus musculus GN=Clmn PE=1 SV=2	1	28	35.2	117.23	1052	0	130.6	25076000	4721000	915110	3807100	5157100	6161600	1.33924	1.41578	0.0765343	2977
P63005	Platelet-activating factor acetylhydrolase IB subunit alpha	Pafah1b1	sp|P63005|LIS1_MOUSE Platelet-activating factor acetylhydrolase IB subunit alpha OS=Mus musculus GN=Pafah1b1 PE=1 SV=2	1	15	40.5	46.67	410	0	125.55	49675000	1550800	10334000	10152000	11456000	7417100	1.3383	2.36045	1.02215	1348
Q9QYB1	Chloride intracellular channel protein 4	Clic4	sp|Q9QYB1|CLIC4_MOUSE Chloride intracellular channel protein 4 OS=Mus musculus GN=Clic4 PE=1 SV=3	1	8	42.7	28.729	253	0	35.244	19700000	1545500	1779500	3114500	6881000	2827700	1.33259	1.08334	-0.249248	4707
Q9CZ62	Centrosomal protein of 97 kDa	Cep97	sp|Q9CZ62|CEP97_MOUSE Centrosomal protein of 97 kDa OS=Mus musculus GN=Cep97 PE=1 SV=1	1	8	10.3	94.64	856	0	12.536	2952200	234550	244810	513670	1188700	295420	1.32614	-1.71403	-3.04017	4069
Q05AC5		4930430A15Rik	tr|Q05AC5|Q05AC5_MOUSE Protein 4930430A15Rik OS=Mus musculus GN=4930430A15Rik PE=2 SV=1	1	6	12	55.079	485	0.00028249	6.372	2764900	203260	186650	365960	617860	423570	1.32064	-2.01848	-3.33912	1549
O35490;Q91WS4	Betaine--homocysteine S-methyltransferase 1	Bhmt	sp|O35490|BHMT1_MOUSE Betaine--homocysteine S-methyltransferase 1 OS=Mus musculus GN=Bhmt PE=1 SV=1	2	19	55.5	45.02	407	0	290.38	239020000	6007200	54462000	49531000	53384000	28993000	1.32042	4.51834	3.19791	514
Q6PR54	Telomere-associated protein RIF1	Rif1	sp|Q6PR54|RIF1_MOUSE Telomere-associated protein RIF1 OS=Mus musculus GN=Rif1 PE=1 SV=2	1	8	5.3	266.23	2419	0	10.611	475960	62501	36075	82990	120780	137840	1.31856	-4.05687	-5.37544	2354
Q8VDS8	Syntaxin-18	Stx18	sp|Q8VDS8|STX18_MOUSE Syntaxin-18 OS=Mus musculus GN=Stx18 PE=1 SV=2	1	4	13.8	38.381	334	0.00026838	5.3681	842020	0	0	519430	188640	0	1.31843	-3.84975	-5.16817	3434
Q8BP97	Rhomboid domain-containing protein 3	Rhbdd3	sp|Q8BP97|RHBD3_MOUSE Rhomboid domain-containing protein 3 OS=Mus musculus GN=Rhbdd3 PE=2 SV=1	1	1	3.1	40.933	385	0.0055449	2.152	864810	277470	0	183890	195850	140130	1.31725	-3.43388	-4.75114	2787
Q8K4B0	Metastasis-associated protein MTA1	Mta1	sp|Q8K4B0|MTA1_MOUSE Metastasis-associated protein MTA1 OS=Mus musculus GN=Mta1 PE=1 SV=1	1	4	6.3	80.797	715	0.00071925	3.4675	783140	218980	23402	132970	193840	182620	1.3158	-3.4674	-4.7832	3251
Q9D9G2	Phosphatidylethanolamine-binding protein 4	Pebp4	sp|Q9D9G2|PEBP4_MOUSE Phosphatidylethanolamine-binding protein 4 OS=Mus musculus GN=Pebp4 PE=1 SV=1	1	2	7.9	26.907	242	0.0031334	2.6346	1038800	78228	0	380540	371420	145200	1.31461	-2.75929	-4.0739	4326
Q9DAH2		Znrf4	sp|Q9DAH2|ZNRF4_MOUSE E3 ubiquitin-protein ligase ZNRF4 OS=Mus musculus GN=Znrf4 PE=1 SV=1	1	1	5.2	35.627	327	0.005539	2.1451	1359700	341460	0	276230	188350	348760	1.31432	-2.8185	-4.13282	4370
Q9D711	Pirin	Pir	sp|Q9D711|PIR_MOUSE Pirin OS=Mus musculus GN=Pir PE=1 SV=1	1	3	14.5	32.066	290	0.0025183	2.845	1301900	132550	0	183650	680440	0	1.31314	-2.84882	-4.16195	4257
Q9WV32	Actin-related protein 2/3 complex subunit 1B	Arpc1b	sp|Q9WV32|ARC1B_MOUSE Actin-related protein 2/3 complex subunit 1B OS=Mus musculus GN=Arpc1b PE=1 SV=4	1	6	20.2	41.063	372	0	15.279	7403200	143980	1435800	1820800	2059600	317780	1.31006	-0.806062	-2.11612	4838
Q02053	Ubiquitin-like modifier-activating enzyme 1	Uba1	sp|Q02053|UBA1_MOUSE Ubiquitin-like modifier-activating enzyme 1 OS=Mus musculus GN=Uba1 PE=1 SV=1	1	26	28.9	117.81	1058	0	226.36	44172000	1931300	6687800	9282500	9493200	6622400	1.30598	2.17251	0.866531	1522
Q3UGC7;Q66JS6	Eukaryotic translation initiation factor 3 subunit J-A;Eukaryotic translation initiation factor 3 subunit J-B	Eif3j1;Eif3j2	sp|Q3UGC7|EI3JA_MOUSE Eukaryotic translation initiation factor 3 subunit J-A OS=Mus musculus GN=Eif3j1 PE=2 SV=1;sp|Q66JS6|EI3JB_MOUSE Eukaryotic translation initiation factor 3 subunit J-B OS=Mus musculus GN=Eif3j2 PE=1 SV=1	2	9	24.9	29.343	261	0	18.988	20003000	764590	3322900	3571500	5598400	2526200	1.30218	0.995764	-0.30642	1723
O35381;Q64G17	Acidic leucine-rich nuclear phosphoprotein 32 family member A;Putative acidic leucine-rich nuclear phosphoprotein 32 family member C	Anp32a;Anp32c	sp|O35381|AN32A_MOUSE Acidic leucine-rich nuclear phosphoprotein 32 family member A OS=Mus musculus GN=Anp32a PE=1 SV=1;sp|Q64G17|AN32C_MOUSE Putative acidic leucine-rich nuclear phosphoprotein 32 family member C OS=Mus musculus GN=Anp32c PE=2 SV=3	2	4	12.1	28.537	247	0.00072063	3.5083	10121000	378480	1663400	1873300	2194400	1504400	1.2986	-0.0142082	-1.31281	508
Q99JZ0	Syntenin-2	Sdcbp2	sp|Q99JZ0|SDCB2_MOUSE Syntenin-2 OS=Mus musculus GN=Sdcbp2 PE=2 SV=1	1	1	3.4	31.564	292	0.0099585	1.8924	1095100	195510	0	163590	363100	247940	1.29779	-2.91885	-4.21664	3723
Q8VBW6	NEDD8-activating enzyme E1 regulatory subunit	Nae1	sp|Q8VBW6|ULA1_MOUSE NEDD8-activating enzyme E1 regulatory subunit OS=Mus musculus GN=Nae1 PE=1 SV=1	1	11	23.2	60.273	534	0	63.422	15694000	477960	2781900	2909400	3134200	2054200	1.29223	0.518724	-0.773505	3373
Q9JII6	Alcohol dehydrogenase [NADP(+)]	Akr1a1	sp|Q9JII6|AK1A1_MOUSE Alcohol dehydrogenase [NADP(+)] OS=Mus musculus GN=Akr1a1 PE=1 SV=3	1	15	48	36.586	325	0	157.35	57519000	2397700	9368300	9635100	13995000	9637700	1.29184	2.55754	1.2657	4587
Q61171	Peroxiredoxin-2	Prdx2	sp|Q61171|PRDX2_MOUSE Peroxiredoxin-2 OS=Mus musculus GN=Prdx2 PE=1 SV=3	1	8	39.4	21.778	198	0	120.89	273390000	9276300	44407000	41843000	64581000	37724000	1.29127	4.65538	3.36411	2003
Q8VE97	Serine/arginine-rich splicing factor 4	Srsf4	sp|Q8VE97|SRSF4_MOUSE Serine/arginine-rich splicing factor 4 OS=Mus musculus GN=Srsf4 PE=2 SV=1	1	5	11.5	55.979	489	0	25.656	9006800	80959	4356600	1721900	2011400	736310	1.29054	-0.440212	-1.73075	3451
Q9D154	Leukocyte elastase inhibitor A	Serpinb1a	sp|Q9D154|ILEUA_MOUSE Leukocyte elastase inhibitor A OS=Mus musculus GN=Serpinb1a PE=1 SV=1	1	9	24.8	42.574	379	0	20.428	12911000	910260	1370800	2366300	3479100	2060100	1.29028	0.470946	-0.819336	4124
Q8BU85	Methionine-R-sulfoxide reductase B3, mitochondrial	Msrb3	sp|Q8BU85|MSRB3_MOUSE Methionine-R-sulfoxide reductase B3, mitochondrial OS=Mus musculus GN=Msrb3 PE=1 SV=2	1	3	13.8	26.832	253	0.0030796	2.4562	7452700	578360	904390	1372100	2255000	1485200	1.28948	-0.157017	-1.44649	2835
Q91WU5	Arsenite methyltransferase	As3mt	sp|Q91WU5|AS3MT_MOUSE Arsenite methyltransferase OS=Mus musculus GN=As3mt PE=1 SV=2	1	5	16.5	41.793	376	0	6.537	2081300	0	426160	305070	373020	423630	1.28596	-2.3486	-3.63456	3553
P56183	Ribosomal RNA processing protein 1 homolog A	Rrp1	sp|P56183|RRP1_MOUSE Ribosomal RNA processing protein 1 homolog A OS=Mus musculus GN=Rrp1 PE=1 SV=2	1	4	9.3	54.776	494	0.00051099	4.502	1433400	38268	471830	305480	322420	295440	1.28334	-2.59137	-3.87471	1176
Q80U28	MAP kinase-activating death domain protein	Madd	sp|Q80U28|MADD_MOUSE MAP kinase-activating death domain protein OS=Mus musculus GN=Madd PE=1 SV=2	1	3	2.3	175.18	1577	0.00027263	5.6166	250850	24490	0	51252	72664	29827	1.28328	-5.26911	-6.55239	2506
Q924M7	Mannose-6-phosphate isomerase	Mpi	sp|Q924M7|MPI_MOUSE Mannose-6-phosphate isomerase OS=Mus musculus GN=Mpi PE=1 SV=1	1	10	31.9	46.575	423	0	91.317	50146000	2568500	7127100	9748900	14475000	6649100	1.28279	2.40089	1.1181	3683
P70195	Proteasome subunit beta type-7	Psmb7	sp|P70195|PSB7_MOUSE Proteasome subunit beta type-7 OS=Mus musculus GN=Psmb7 PE=1 SV=1	1	6	15.9	29.891	277	0	37.361	45263000	1168800	9924000	6545600	11256000	6411200	1.28189	2.07084	0.788955	1387
P14602	Heat shock protein beta-1	Hspb1	sp|P14602|HSPB1_MOUSE Heat shock protein beta-1 OS=Mus musculus GN=Hspb1 PE=1 SV=3	1	11	59.3	23.014	209	0	76.585	60258000	4257000	7315400	12154000	17207000	9914600	1.28084	2.7822	1.50137	821
O55229	Choline/ethanolamine kinase	Chkb	sp|O55229|CHKB_MOUSE Choline/ethanolamine kinase OS=Mus musculus GN=Chkb PE=1 SV=3	1	4	13.5	45.126	394	0	7.2927	2578900	183600	304430	518160	767530	395970	1.28028	-1.77933	-3.05961	588
O88738	Baculoviral IAP repeat-containing protein 6	Birc6	sp|O88738|BIRC6_MOUSE Baculoviral IAP repeat-containing protein 6 OS=Mus musculus GN=Birc6 PE=1 SV=2	1	32	9	532.16	4882	0	90.513	3306800	257810	307820	595470	709700	627800	1.27826	-1.52849	-2.80675	663
Q9CPY7	Cytosol aminopeptidase	Lap3	sp|Q9CPY7|AMPL_MOUSE Cytosol aminopeptidase OS=Mus musculus GN=Lap3 PE=1 SV=3	1	6	15.6	56.141	519	0	8.0192	4183100	229310	534790	1145400	1059700	419040	1.2773	-1.21552	-2.49281	3857
Q99K95	Protein RTF2 homolog	Rtfdc1	sp|Q99K95|RTF2_MOUSE Protein RTF2 homolog OS=Mus musculus GN=Rtfdc1 PE=1 SV=1	1	2	10.4	33.934	307	0.00026371	5.0375	769340	275180	0	0	141010	288070	1.27616	-3.79012	-5.06629	3731
P12382	ATP-dependent 6-phosphofructokinase, liver type	Pfkl	sp|P12382|PFKAL_MOUSE ATP-dependent 6-phosphofructokinase, liver type OS=Mus musculus GN=Pfkl PE=1 SV=4	1	12	21.9	85.359	780	0	22.605	4996100	259530	725120	1163400	1266800	650810	1.27343	-0.91046	-2.18389	806
Q9WUM3	Coronin-1B	Coro1b	sp|Q9WUM3|COR1B_MOUSE Coronin-1B OS=Mus musculus GN=Coro1b PE=1 SV=1	1	5	8.7	53.912	484	0.00072534	3.6169	10081000	1109600	737860	2149900	2853200	1417400	1.27292	0.149625	-1.12329	4828
O35639	Annexin A3	Anxa3	sp|O35639|ANXA3_MOUSE Annexin A3 OS=Mus musculus GN=Anxa3 PE=1 SV=4	1	4	12.4	36.384	323	0.0016317	3.0865	1482500	0	177060	453860	455770	197080	1.27243	-2.42922	-3.70165	524
F6XZJ7	Sterile alpha motif domain-containing protein 15	Samd15	sp|F6XZJ7|SAM15_MOUSE Sterile alpha motif domain-containing protein 15 OS=Mus musculus GN=Samd15 PE=3 SV=2	1	4	9.5	70.456	620	0.00051073	4.4963	3340300	24398	1416600	151980	851710	578720	1.26972	-2.13663	-3.40635	375
P97440	Histone RNA hairpin-binding protein	Slbp	sp|P97440|SLBP_MOUSE Histone RNA hairpin-binding protein OS=Mus musculus GN=Slbp PE=1 SV=1	1	2	17.5	31.603	275	0	6.8484	5017600	0	2107900	239110	1428100	1119500	1.26785	-1.35284	-2.6207	1471
Q5BN45	UPF0691 protein C9orf116 homolog		sp|Q5BN45|CI116_MOUSE UPF0691 protein C9orf116 homolog OS=Mus musculus PE=2 SV=1	1	2	25.7	18.836	167	0.0018459	2.9285	2666700	887040	0	237890	937870	495310	1.26755	-1.94966	-3.21721	1865
P99029	Peroxiredoxin-5, mitochondrial	Prdx5	sp|P99029|PRDX5_MOUSE Peroxiredoxin-5, mitochondrial OS=Mus musculus GN=Prdx5 PE=1 SV=2	1	8	37.6	21.897	210	0	48.434	33918000	789050	7783600	4101700	9675600	4437800	1.26611	1.5964	0.330293	1507
Q3UTA4;Q3TQZ4;M0QWL1;J3QP87;J3QNT6;Q8BX20;J3QQ02;J3QPI8;F6YNI8;Q3UT53;J3QMW5;D3Z367;J3QPQ5		Gm8300;Gm2016;Gm21936;Gm2035;Gm5039;Gm5662;Gm2056;Gm6803;Gm21319;Gm4027;Gm2075;Gm2046	tr|Q3UTA4|Q3UTA4_MOUSE Protein Gm8300 OS=Mus musculus GN=Gm8300 PE=2 SV=1;tr|Q3TQZ4|Q3TQZ4_MOUSE Protein Gm2016 OS=Mus musculus GN=Gm2016 PE=2 SV=1;tr|M0QWL1|M0QWL1_MOUSE Protein Gm21936 OS=Mus musculus GN=Gm21936 PE=3 SV=1;tr|J3QP87|J3QP87_MOUSE Protein G	13	4	29.9	16.568	144	0.00452	2.2286	5889100	0	2101200	637260	2216800	425880	1.26516	-1.13476	-2.39991	425
A0A0A6YXW6;P01878		Igha	tr|A0A0A6YXW6|A0A0A6YXW6_MOUSE Protein Igha (Fragment) OS=Mus musculus GN=Igha PE=1 SV=1	2	6	19	41.958	389	0	208.16	92184000	29582000	623250	1340000	23077000	29547000	1.26487	2.38811	1.12324	23
Q6PHN9	Ras-related protein Rab-35	Rab35	sp|Q6PHN9|RAB35_MOUSE Ras-related protein Rab-35 OS=Mus musculus GN=Rab35 PE=1 SV=1	1	2	12.4	23.025	201	0.000518	4.7049	1478700	0	360740	249400	414240	290740	1.26434	-2.57612	-3.84046	2343
Q9DC63	F-box only protein 3	Fbxo3	sp|Q9DC63|FBX3_MOUSE F-box only protein 3 OS=Mus musculus GN=Fbxo3 PE=1 SV=1	1	4	8.5	55.227	480	0.00049826	4.1024	2270300	94711	303530	305420	286980	640470	1.26385	-2.27538	-3.53923	4455
Q3UXL1;P70694;Q91WT7;Q91WR5;Q8K023;Q8VC77		Akr1cl	tr|Q3UXL1|Q3UXL1_MOUSE Protein Akr1cl OS=Mus musculus GN=Akr1cl PE=1 SV=1	6	12	41.9	36.872	322	0	112.6	76032000	1977400	15922000	15376000	12525000	10479000	1.25993	2.76918	1.50926	1791
P47738	Aldehyde dehydrogenase, mitochondrial	Aldh2	sp|P47738|ALDH2_MOUSE Aldehyde dehydrogenase, mitochondrial OS=Mus musculus GN=Aldh2 PE=1 SV=1	1	7	12.3	56.537	519	0.00027427	5.7225	2005100	203010	161320	266890	664850	380230	1.25826	-2.18695	-3.44521	1060
Q99PT1	Rho GDP-dissociation inhibitor 1	Arhgdia	sp|Q99PT1|GDIR1_MOUSE Rho GDP-dissociation inhibitor 1 OS=Mus musculus GN=Arhgdia PE=1 SV=3	1	7	46.1	23.407	204	0	185.88	193290000	5464100	42823000	34003000	50666000	23479000	1.25474	4.21087	2.95613	3828
P57759	Endoplasmic reticulum resident protein 29	Erp29	sp|P57759|ERP29_MOUSE Endoplasmic reticulum resident protein 29 OS=Mus musculus GN=Erp29 PE=1 SV=2	1	6	25.2	28.823	262	0	21.104	34083000	1895000	5314500	8846800	8782500	4637900	1.25363	1.94068	0.687045	1195
Q8R146	Acylamino-acid-releasing enzyme	Apeh	sp|Q8R146|APEH_MOUSE Acylamino-acid-releasing enzyme OS=Mus musculus GN=Apeh PE=1 SV=3	1	13	21.4	81.58	732	0	90.572	25273000	878480	4626400	4597500	6094100	3295500	1.25338	1.28585	0.032465	3291
Q91ZT8	Ankyrin repeat and SOCS box protein 9	Asb9	sp|Q91ZT8|ASB9_MOUSE Ankyrin repeat and SOCS box protein 9 OS=Mus musculus GN=Asb9 PE=1 SV=2	1	4	12.4	31.656	290	0	9.1004	24917000	1920300	2484100	4752200	7256500	3385600	1.25068	1.39869	0.148006	3609
Q8R3B7	Bromodomain-containing protein 8	Brd8	sp|Q8R3B7|BRD8_MOUSE Bromodomain-containing protein 8 OS=Mus musculus GN=Brd8 PE=1 SV=2	1	4	5.6	102.61	951	0.00072289	3.5555	1008600	94014	117830	208700	244860	250590	1.24102	-2.9861	-4.22712	3331
Q8BL66	Early endosome antigen 1	Eea1	sp|Q8BL66|EEA1_MOUSE Early endosome antigen 1 OS=Mus musculus GN=Eea1 PE=1 SV=2	1	11	9.8	160.91	1411	0	13.357	961260	45565	163250	249420	279140	100630	1.23828	-3.27613	-4.51441	2746
Q62415;Q8CG79	Apoptosis-stimulating of p53 protein 1;Apoptosis-stimulating of p53 protein 2	Ppp1r13b;Tp53bp2	sp|Q62415|ASPP1_MOUSE Apoptosis-stimulating of p53 protein 1 OS=Mus musculus GN=Ppp1r13b PE=1 SV=2;sp|Q8CG79|ASPP2_MOUSE Apoptosis-stimulating of p53 protein 2 OS=Mus musculus GN=Tp53bp2 PE=1 SV=3	2	2	1.7	119.17	1087	0.0087774	1.9533	162360	15416	18703	36576	45789	31688	1.23471	-5.62432	-6.85903	2106
E9Q7P1		Col22a1	tr|E9Q7P1|E9Q7P1_MOUSE Protein Col22a1 OS=Mus musculus GN=Col22a1 PE=1 SV=1	1	10	10.2	159.94	1613	0	16.627	1393500	0	301490	311990	327140	180750	1.23398	-2.81053	-4.04451	349
P40124	Adenylyl cyclase-associated protein 1	Cap1	sp|P40124|CAP1_MOUSE Adenylyl cyclase-associated protein 1 OS=Mus musculus GN=Cap1 PE=1 SV=4	1	19	44.7	51.564	474	0	207.71	68551000	6561100	6011700	14167000	17514000	10765000	1.23215	2.90398	1.67183	1018
P58389	Serine/threonine-protein phosphatase 2A activator	Ppp2r4	sp|P58389|PTPA_MOUSE Serine/threonine-protein phosphatase 2A activator OS=Mus musculus GN=Ppp2r4 PE=1 SV=1	1	11	37.8	36.71	323	0	99.524	83115000	3955600	13109000	18593000	18738000	11489000	1.22934	3.09851	1.86917	1203
Q9CQU0	Thioredoxin domain-containing protein 12	Txndc12	sp|Q9CQU0|TXD12_MOUSE Thioredoxin domain-containing protein 12 OS=Mus musculus GN=Txndc12 PE=1 SV=1	1	3	19.4	19.048	170	0	6.9916	15479000	753790	2325200	2474000	4632400	2169800	1.22921	0.654982	-0.574225	3928
Q9DAR7	m7GpppX diphosphatase	Dcps	sp|Q9DAR7|DCPS_MOUSE m7GpppX diphosphatase OS=Mus musculus GN=Dcps PE=1 SV=1	1	8	33.1	38.988	338	0	70.51	18752000	509920	3973200	2325600	5360800	2469000	1.22728	0.757585	-0.469699	4392
Q8BGT8	Phytanoyl-CoA hydroxylase-interacting protein-like	Phyhipl	sp|Q8BGT8|PHIPL_MOUSE Phytanoyl-CoA hydroxylase-interacting protein-like OS=Mus musculus GN=Phyhipl PE=1 SV=1	1	4	10.7	42.34	375	0.00026788	5.3165	5886300	266110	1173400	1176400	1338000	1182700	1.22706	-0.591561	-1.81863	2668
Q9QXB9	Developmentally-regulated GTP-binding protein 2	Drg2	sp|Q9QXB9|DRG2_MOUSE Developmentally-regulated GTP-binding protein 2 OS=Mus musculus GN=Drg2 PE=1 SV=1	1	5	16.2	40.718	364	0	10.068	3843000	597710	210750	855720	687020	810120	1.22633	-1.24713	-2.47346	4678
Q9R1P0	Proteasome subunit alpha type-4	Psma4	sp|Q9R1P0|PSA4_MOUSE Proteasome subunit alpha type-4 OS=Mus musculus GN=Psma4 PE=1 SV=1	1	9	33.7	29.47	261	0	19.639	122340000	3664800	26875000	20237000	25697000	19726000	1.21914	3.55109	2.33194	4782
Q8BP78	Protein FRA10AC1 homolog	Fra10ac1	sp|Q8BP78|F10C1_MOUSE Protein FRA10AC1 homolog OS=Mus musculus GN=Fra10ac1 PE=1 SV=3	1	2	8.6	37.202	315	0.0055425	2.1506	1167000	109120	132380	269650	203390	331520	1.21812	-2.81752	-4.03565	2785
Q9R1P4	Proteasome subunit alpha type-1	Psma1	sp|Q9R1P4|PSA1_MOUSE Proteasome subunit alpha type-1 OS=Mus musculus GN=Psma1 PE=1 SV=1	1	16	60.5	29.546	263	0	125.67	130040000	4449800	26835000	24318000	31796000	17655000	1.21763	3.6885	2.47087	4785
Q52KI8	Serine/arginine repetitive matrix protein 1	Srrm1	sp|Q52KI8|SRRM1_MOUSE Serine/arginine repetitive matrix protein 1 OS=Mus musculus GN=Srrm1 PE=1 SV=2	1	11	13.6	106.86	946	0	317.31	45045000	1222500	6499900	2280100	31300000	3261500	1.2144	1.7305	0.516106	1854
Q8K296;Q91XS1	Myotubularin-related protein 3	Mtmr3	sp|Q8K296|MTMR3_MOUSE Myotubularin-related protein 3 OS=Mus musculus GN=Mtmr3 PE=1 SV=2	2	5	5	133.84	1196	0.00071891	3.463	386030	0	21106	37633	100840	87443	1.2135	-4.74282	-5.95632	3196
Q9D820	Prolyl-tRNA synthetase associated domain-containing protein 1	Prorsd1	sp|Q9D820|PRXD1_MOUSE Prolyl-tRNA synthetase associated domain-containing protein 1 OS=Mus musculus GN=Prorsd1 PE=1 SV=1	1	2	15.4	18.862	169	0.00094118	3.2149	1702300	71936	364550	372720	475900	248010	1.21288	-2.39262	-3.6055	4278
Q8K354	Carbonyl reductase [NADPH] 3	Cbr3	sp|Q8K354|CBR3_MOUSE Carbonyl reductase [NADPH] 3 OS=Mus musculus GN=Cbr3 PE=1 SV=1	1	5	19.9	30.953	277	0.00027716	5.9213	3076700	132910	527790	633150	828060	363420	1.20805	-1.68769	-2.89574	3227
Q8BSL7	ADP-ribosylation factor 2	Arf2	sp|Q8BSL7|ARF2_MOUSE ADP-ribosylation factor 2 OS=Mus musculus GN=Arf2 PE=1 SV=2	1	10	58.6	20.746	181	0.0020742	2.9076	5804900	847200	402700	1500400	1443200	938010	1.2051	-0.549643	-1.75474	2814
Q02819	Nucleobindin-1	Nucb1	sp|Q02819|NUCB1_MOUSE Nucleobindin-1 OS=Mus musculus GN=Nucb1 PE=1 SV=2	1	5	11.8	53.408	459	0.00028003	6.1521	2771600	83446	677350	604830	558100	403180	1.20203	-1.84951	-3.05154	1527
Q91VM9	Inorganic pyrophosphatase 2, mitochondrial	Ppa2	sp|Q91VM9|IPYR2_MOUSE Inorganic pyrophosphatase 2, mitochondrial OS=Mus musculus GN=Ppa2 PE=1 SV=1	1	7	24.2	38.114	330	0	25.189	9921600	261120	2558400	1384300	2379500	1667700	1.19882	-0.0711832	-1.27001	3504
Q62087	Serum paraoxonase/lactonase 3	Pon3	sp|Q62087|PON3_MOUSE Serum paraoxonase/lactonase 3 OS=Mus musculus GN=Pon3 PE=1 SV=2	1	5	15.8	39.351	354	0	7.3007	13674000	2054800	785600	3569300	1744000	3296200	1.19613	0.562541	-0.633589	2074
P13707	Glycerol-3-phosphate dehydrogenase [NAD(+)], cytoplasmic	Gpd1	sp|P13707|GPDA_MOUSE Glycerol-3-phosphate dehydrogenase [NAD(+)], cytoplasmic OS=Mus musculus GN=Gpd1 PE=1 SV=3	1	9	21.5	37.572	349	0	65.595	28862000	1268500	4009400	5062800	6149500	3658500	1.19258	1.38681	0.194235	811
F6PYN5		Gm15130	tr|F6PYN5|F6PYN5_MOUSE Protein Gm15130 (Fragment) OS=Mus musculus GN=Gm15130 PE=4 SV=1	1	2	10.2	22.992	206	0.00073171	3.7496	370720	0	0	0	145240	0	1.19235	-4.60228	-5.79462	369
Q03958	Prefoldin subunit 6	Pfdn6	sp|Q03958|PFD6_MOUSE Prefoldin subunit 6 OS=Mus musculus GN=Pfdn6 PE=1 SV=1	1	3	23.6	14.454	127	0.00071702	3.4304	10863000	777010	1358300	1541500	3345400	2060700	1.18626	0.246142	-0.940117	1534
Q8BH58	TIP41-like protein	Tiprl	sp|Q8BH58|TIPRL_MOUSE TIP41-like protein OS=Mus musculus GN=Tiprl PE=1 SV=1	1	4	21.4	31.253	271	0	6.5764	14049000	1420400	1341000	2817600	4013700	2265200	1.18349	0.669271	-0.514217	2678
Q8C735	Protein lin-9 homolog	Lin9	sp|Q8C735|LIN9_MOUSE Protein lin-9 homolog OS=Mus musculus GN=Lin9 PE=1 SV=2	1	4	9.8	61.758	542	0.00027488	5.7587	1793600	253850	140910	407120	745800	217050	1.18333	-2.19825	-3.38157	2994
Q9EPC1	Alpha-parvin	Parva	sp|Q9EPC1|PARVA_MOUSE Alpha-parvin OS=Mus musculus GN=Parva PE=1 SV=1	1	9	29.6	42.329	372	0	83.992	35393000	4015600	2941700	11286000	10472000	3339100	1.18228	1.98439	0.802112	4482
P98086	Complement C1q subcomponent subunit A	C1qa	sp|P98086|C1QA_MOUSE Complement C1q subcomponent subunit A OS=Mus musculus GN=C1qa PE=1 SV=2	1	2	10.2	25.974	245	0.0027211	2.7487	1385000	139570	98693	52622	519760	574370	1.18213	-2.88781	-4.06994	1502
Q8VCI5	Peroxisomal biogenesis factor 19	Pex19	sp|Q8VCI5|PEX19_MOUSE Peroxisomal biogenesis factor 19 OS=Mus musculus GN=Pex19 PE=1 SV=1	1	3	14.7	32.733	299	0.0080051	2.0126	1404700	0	451060	294730	475210	183750	1.17996	-2.65043	-3.83039	3396
Q8BJU0	Small glutamine-rich tetratricopeptide repeat-containing protein alpha	Sgta	sp|Q8BJU0|SGTA_MOUSE Small glutamine-rich tetratricopeptide repeat-containing protein alpha OS=Mus musculus GN=Sgta PE=1 SV=2	1	7	24.8	34.322	315	0	17.696	18580000	1865800	1687600	3892700	4211900	3284900	1.17826	1.02662	-0.151636	2725
Q8K1B8	Fermitin family homolog 3	Fermt3	sp|Q8K1B8|URP2_MOUSE Fermitin family homolog 3 OS=Mus musculus GN=Fermt3 PE=1 SV=1	1	4	8.1	75.634	665	0.00072429	3.5997	459620	149000	12217	69724	107180	99950	1.17716	-4.35266	-5.52981	3179
Q6NXW6	Cell cycle checkpoint protein RAD17	Rad17	sp|Q6NXW6|RAD17_MOUSE Cell cycle checkpoint protein RAD17 OS=Mus musculus GN=Rad17 PE=1 SV=2	1	7	11	77.39	688	0.00051414	4.6091	2028000	458080	75706	281120	642880	341900	1.17468	-2.22923	-3.40391	2247
Q9CS42	Ribose-phosphate pyrophosphokinase 2	Prps2	sp|Q9CS42|PRPS2_MOUSE Ribose-phosphate pyrophosphokinase 2 OS=Mus musculus GN=Prps2 PE=1 SV=4	1	6	24.8	34.786	318	0.00094406	3.2537	951160	34112	215080	190710	260460	120740	1.17345	-3.35089	-4.52434	3975
P49722	Proteasome subunit alpha type-2	Psma2	sp|P49722|PSA2_MOUSE Proteasome subunit alpha type-2 OS=Mus musculus GN=Psma2 PE=1 SV=3	1	9	53.4	25.926	234	0	92.054	76086000	1994700	17865000	14391000	16302000	8636800	1.17252	2.77112	1.5986	1104
P61161	Actin-related protein 2	Actr2	sp|P61161|ARP2_MOUSE Actin-related protein 2 OS=Mus musculus GN=Actr2 PE=1 SV=1	1	5	16.8	44.76	394	0	32.91	15460000	1049100	1869600	2925600	3710400	2401700	1.17079	0.677714	-0.493079	1249
Q8VE42	Ankyrin repeat domain-containing protein 49	Ankrd49	sp|Q8VE42|ANR49_MOUSE Ankyrin repeat domain-containing protein 49 OS=Mus musculus GN=Ankrd49 PE=1 SV=1	1	3	15.1	27.111	238	0	10.585	3286100	196850	471140	636510	1093800	384800	1.17051	-1.52381	-2.69432	3444
Q03173	Protein enabled homolog	Enah	sp|Q03173|ENAH_MOUSE Protein enabled homolog OS=Mus musculus GN=Enah PE=1 SV=2	1	9	14.6	85.843	802	0	60.161	8020200	668100	931270	1074100	3023400	1427700	1.16857	-0.152743	-1.32132	1530
E9Q8I7		Nfxl1	tr|E9Q8I7|E9Q8I7_MOUSE Protein Nfxl1 OS=Mus musculus GN=Nfxl1 PE=1 SV=1	1	7	10.9	101.51	918	0	13.014	3362600	525380	187540	378640	1792500	427810	1.16557	-1.4851	-2.65067	353
Q8R5M0	PDZ domain-containing protein GIPC3	Gipc3	sp|Q8R5M0|GIPC3_MOUSE PDZ domain-containing protein GIPC3 OS=Mus musculus GN=Gipc3 PE=1 SV=1	1	6	23.9	32.108	297	0.00027189	5.5982	19090000	879080	2019100	10186000	1298600	1678000	1.16546	0.600331	-0.565132	3367
Q6AW46	Carboxylesterase 5A	Ces5a	sp|Q6AW46|EST5A_MOUSE Carboxylesterase 5A OS=Mus musculus GN=Ces5a PE=2 SV=1	1	3	6.8	64.166	575	0.00050826	4.4352	539910	61075	0	0	383140	95687	1.16454	-4.07562	-5.24016	2200
Q9WV68	Peroxisomal 2,4-dienoyl-CoA reductase	Decr2	sp|Q9WV68|DECR2_MOUSE Peroxisomal 2,4-dienoyl-CoA reductase OS=Mus musculus GN=Decr2 PE=1 SV=1	1	6	24.7	31.3	292	0	7.754	3074800	116860	814630	666730	826900	494350	1.15993	-1.51555	-2.67549	4842
P63087;P62137	Serine/threonine-protein phosphatase PP1-gamma catalytic subunit;Serine/threonine-protein phosphatase PP1-alpha catalytic subunit	Ppp1cc;Ppp1ca	sp|P63087|PP1G_MOUSE Serine/threonine-protein phosphatase PP1-gamma catalytic subunit OS=Mus musculus GN=Ppp1cc PE=1 SV=1;sp|P62137|PP1A_MOUSE Serine/threonine-protein phosphatase PP1-alpha catalytic subunit OS=Mus musculus GN=Ppp1ca PE=1 SV=1	2	12	39	36.983	323	0	60.852	43627000	2272800	5520100	10108000	11695000	3478100	1.15855	2.00411	0.845562	1358
O09131;Q8K2Q2	Glutathione S-transferase omega-1	Gsto1	sp|O09131|GSTO1_MOUSE Glutathione S-transferase omega-1 OS=Mus musculus GN=Gsto1 PE=1 SV=2	2	3	13.8	27.497	240	0	7.5227	5684200	302330	819370	1374800	1300100	632880	1.1545	-0.831124	-1.98563	479
Q8CD19	LanC-like protein 3	Lancl3	sp|Q8CD19|LANC3_MOUSE LanC-like protein 3 OS=Mus musculus GN=Lancl3 PE=2 SV=2	1	2	6.4	46.474	420	0.0055556	2.1686	1274100	109740	118320	206240	301260	218460	1.15445	-2.9581	-4.11256	3034
P34022	Ran-specific GTPase-activating protein	Ranbp1	sp|P34022|RANG_MOUSE Ran-specific GTPase-activating protein OS=Mus musculus GN=Ranbp1 PE=1 SV=2	1	7	48.8	23.596	203	0	56.063	185830000	17016000	19360000	34326000	58987000	27066000	1.15402	4.35691	3.20289	981
Q8BP27	Swi5-dependent recombination DNA repair protein 1 homolog	Sfr1	sp|Q8BP27|SFR1_MOUSE Swi5-dependent recombination DNA repair protein 1 homolog OS=Mus musculus GN=Sfr1 PE=1 SV=2	1	3	9.7	35.182	319	0.0027143	2.7298	1209000	67708	165840	72280	582900	255360	1.1475	-3.06985	-4.21735	2779
Q9R0Y5	Adenylate kinase isoenzyme 1	Ak1	sp|Q9R0Y5|KAD1_MOUSE Adenylate kinase isoenzyme 1 OS=Mus musculus GN=Ak1 PE=1 SV=1	1	9	45.9	21.539	194	0	79.239	128730000	7895700	19280000	21409000	34195000	23166000	1.14683	3.79286	2.64603	4776
Q8BP22	Protein FAM92A1	Fam92a1	sp|Q8BP22|F92A1_MOUSE Protein FAM92A1 OS=Mus musculus GN=Fam92a1 PE=1 SV=1	1	3	9.6	39.958	355	0	7.6223	3687800	284960	240140	465470	705710	491750	1.14653	-1.76711	-2.91363	2778
Q8R574	Phosphoribosyl pyrophosphate synthase-associated protein 2	Prpsap2	sp|Q8R574|KPRB_MOUSE Phosphoribosyl pyrophosphate synthase-associated protein 2 OS=Mus musculus GN=Prpsap2 PE=1 SV=1	1	7	23.3	40.88	369	0	22.594	14233000	929390	2002800	3104000	2914600	2520700	1.14418	0.613343	-0.530834	3361
Q9D9Z1	Small kinetochore-associated protein	Knstrn	sp|Q9D9Z1|SKAP_MOUSE Small kinetochore-associated protein OS=Mus musculus GN=Knstrn PE=2 SV=2	1	5	17.9	34.728	312	0	12.385	12768000	1443600	1371400	2203200	3555700	3181400	1.14242	0.656058	-0.486361	4351
Q8C6B0;Q5I0W6;G3X9G9;Q76I26		Mettl7a1	tr|Q8C6B0|Q8C6B0_MOUSE MCG20149, isoform CRA_a OS=Mus musculus GN=Mettl7a1 PE=1 SV=1	4	3	11.9	28.096	244	0.00050454	4.3339	4732000	667080	332330	898950	1202200	861670	1.14104	-0.924675	-2.06571	2988
D3YVJ1		Gm5901	tr|D3YVJ1|D3YVJ1_MOUSE Protein Gm5901 OS=Mus musculus GN=Gm5901 PE=4 SV=1	1	2	7.5	36.62	333	0.00071788	3.4395	418130	42585	0	0	240050	83766	1.13722	-4.32962	-5.46683	242
Q91VT1	E3 SUMO-protein ligase NSE2	Nsmce2	sp|Q91VT1|NSE2_MOUSE E3 SUMO-protein ligase NSE2 OS=Mus musculus GN=Nsmce2 PE=2 SV=1	1	3	14.6	28.231	247	0	10.413	4669900	514600	415250	609610	1798600	795310	1.13597	-0.956267	-2.09223	3509
O55042	Alpha-synuclein	Snca	sp|O55042|SYUA_MOUSE Alpha-synuclein OS=Mus musculus GN=Snca PE=1 SV=2	1	3	36.4	14.485	140	0.00051203	4.5391	4008400	0	1000600	425620	802280	1474000	1.13475	-1.22056	-2.35531	571
P98078	Disabled homolog 2	Dab2	sp|P98078|DAB2_MOUSE Disabled homolog 2 OS=Mus musculus GN=Dab2 PE=1 SV=2	1	2	4	82.311	766	0.0089789	1.9466	503340	86225	31589	123790	156870	64391	1.13424	-4.10487	-5.23911	1501
O88736	3-keto-steroid reductase	Hsd17b7	sp|O88736|DHB7_MOUSE 3-keto-steroid reductase OS=Mus musculus GN=Hsd17b7 PE=1 SV=1	1	2	6.9	37.316	334	0.0097612	1.9037	530930	0	0	454400	76534	0	1.13334	-3.77655	-4.90988	662
Q9R0Q6	Actin-related protein 2/3 complex subunit 1A	Arpc1a	sp|Q9R0Q6|ARC1A_MOUSE Actin-related protein 2/3 complex subunit 1A OS=Mus musculus GN=Arpc1a PE=1 SV=1	1	2	8.9	41.626	370	0.00072657	3.649	1126300	53425	244110	239210	264720	203380	1.12603	-2.98336	-4.10939	4770
Q2VPR5		Hdgfl1	tr|Q2VPR5|Q2VPR5_MOUSE Hepatoma derived growth factor-like 1 OS=Mus musculus GN=Hdgfl1 PE=1 SV=1	1	9	32.2	31.682	283	0	62.658	54791000	2819500	10041000	12536000	15223000	6785300	1.12318	2.55579	1.43261	1607
Q9JJ66	Cell division cycle protein 20 homolog	Cdc20	sp|Q9JJ66|CDC20_MOUSE Cell division cycle protein 20 homolog OS=Mus musculus GN=Cdc20 PE=1 SV=2	1	8	19.4	54.815	499	0	22.387	9758400	692300	1385600	1635900	2591400	1890900	1.11959	0.110555	-1.00903	4596
Q922Q9	Chitinase domain-containing protein 1	Chid1	sp|Q922Q9|CHID1_MOUSE Chitinase domain-containing protein 1 OS=Mus musculus GN=Chid1 PE=1 SV=1	1	6	16	44.905	393	0	12.187	11108000	904320	1449100	2551400	2497300	2007200	1.1192	0.335207	-0.783989	3661
Q8BG37		Prdx6b	tr|Q8BG37|Q8BG37_MOUSE MCG48959 OS=Mus musculus GN=Prdx6b PE=1 SV=1	1	11	48.2	24.996	224	0	34.314	13082000	1107000	1582600	2833500	4081900	1702300	1.11724	0.542697	-0.574545	2645
P97432	Next to BRCA1 gene 1 protein	Nbr1	sp|P97432|NBR1_MOUSE Next to BRCA1 gene 1 protein OS=Mus musculus GN=Nbr1 PE=1 SV=1	1	8	9.8	109.96	988	0	14.029	4498500	287800	201080	481610	429090	570280	1.1158	-1.91873	-3.03453	1469
Q64727	Vinculin	Vcl	sp|Q64727|VINC_MOUSE Vinculin OS=Mus musculus GN=Vcl PE=1 SV=4	1	39	43.7	116.72	1066	0	287.13	27084000	1389700	4342900	4644000	5244500	5150500	1.11553	1.43322	0.317696	2160
O08716;A0A0A6YW05;P24526	Fatty acid-binding protein 9	Fabp9;Gm37389	sp|O08716|FABP9_MOUSE Fatty acid-binding protein 9 OS=Mus musculus GN=Fabp9 PE=1 SV=2;tr|A0A0A6YW05|A0A0A6YW05_MOUSE Protein Gm37389 OS=Mus musculus GN=Gm37389 PE=3 SV=1	3	11	81.8	15.017	132	0	248.69	681940000	22406000	158080000	100770000	176660000	98308000	1.10645	6.02259	4.91614	450
Q8K0C9	GDP-mannose 4,6 dehydratase	Gmds	sp|Q8K0C9|GMDS_MOUSE GDP-mannose 4,6 dehydratase OS=Mus musculus GN=Gmds PE=1 SV=1	1	6	17.2	41.984	372	0.0002791	6.0729	2561200	176520	328850	417280	534830	517630	1.10399	-1.92833	-3.03232	3162
Q8BKX1	Brain-specific angiogenesis inhibitor 1-associated protein 2	Baiap2	sp|Q8BKX1|BAIP2_MOUSE Brain-specific angiogenesis inhibitor 1-associated protein 2 OS=Mus musculus GN=Baiap2 PE=1 SV=2	1	2	4.3	59.236	535	0.0018454	2.9283	644330	48145	118940	103920	207920	165390	1.10322	-3.59988	-4.7031	2742
Q922G2	Protein FAM76A	Fam76a	sp|Q922G2|FA76A_MOUSE Protein FAM76A OS=Mus musculus GN=Fam76a PE=2 SV=1	1	5	17.6	35.095	307	0	25.25	7825800	908850	907400	1811200	2143400	1588600	1.10252	-0.0155395	-1.11806	3651
Q91ZM2	SH2B adapter protein 1	Sh2b1	sp|Q91ZM2|SH2B1_MOUSE SH2B adapter protein 1 OS=Mus musculus GN=Sh2b1 PE=1 SV=2	1	4	7	79.624	756	0	9.8178	1524200	457050	54211	319040	490570	203280	1.098	-2.54845	-3.64644	3604
P50580	Proliferation-associated protein 2G4	Pa2g4	sp|P50580|PA2G4_MOUSE Proliferation-associated protein 2G4 OS=Mus musculus GN=Pa2g4 PE=1 SV=3	1	21	47	43.698	394	0	323.31	325770000	1213000	199640000	35382000	37147000	23281000	1.09576	4.07666	2.9809	1115
Q9R257	Heme-binding protein 1	Hebp1	sp|Q9R257|HEBP1_MOUSE Heme-binding protein 1 OS=Mus musculus GN=Hebp1 PE=1 SV=2	1	3	26.3	21.067	190	0	14.802	10778000	286590	3082200	2222300	1754100	1725200	1.09462	0.0261087	-1.06851	4792
P13020;CON__Q3SX14	Gelsolin	Gsn	sp|P13020|GELS_MOUSE Gelsolin OS=Mus musculus GN=Gsn PE=1 SV=3	2	16	21.4	85.941	780	0	40.494	19429000	1080600	2938700	3853000	4646800	2548800	1.09245	0.946939	-0.145515	809
Q62219	Transforming growth factor beta-1-induced transcript 1 protein	Tgfb1i1	sp|Q62219|TGFI1_MOUSE Transforming growth factor beta-1-induced transcript 1 protein OS=Mus musculus GN=Tgfb1i1 PE=1 SV=2	1	1	4.3	50.1	461	0.0031015	2.5348	790970	206610	0	103720	195240	172840	1.0919	-3.60988	-4.70178	2089
Q6P8Y0	Uncharacterized protein C15orf26 homolog		sp|Q6P8Y0|CF161_MOUSE Cilia- and flagella-associated protein 161 OS=Mus musculus GN=Cfap161 PE=1 SV=1	1	2	8.6	34.388	303	0.001626	3.0315	1119600	113090	0	115760	530350	301510	1.09155	-2.80891	-3.90046	2292
P17751	Triosephosphate isomerase	Tpi1	sp|P17751|TPIS_MOUSE Triosephosphate isomerase OS=Mus musculus GN=Tpi1 PE=1 SV=4	1	13	51.8	32.191	299	0	220.56	97001000	5409900	15132000	17024000	26367000	13191000	1.08826	3.28681	2.19855	854
Q9D9I1	Testis-expressed sequence 43 protein	Tex43	sp|Q9D9I1|TEX43_MOUSE Testis-expressed sequence 43 protein OS=Mus musculus GN=Tex43 PE=1 SV=2	1	2	16.3	16.281	141	0.0027391	2.8103	2676000	1318800	0	501260	476650	379340	1.08627	-2.04501	-3.13127	4329
Q62148;Q9JHW9	Retinal dehydrogenase 2	Aldh1a2	sp|Q62148|AL1A2_MOUSE Retinal dehydrogenase 2 OS=Mus musculus GN=Aldh1a2 PE=1 SV=2	2	13	26.6	56.625	518	0	77.08	26844000	932240	5749100	4823700	6135200	3331600	1.08538	1.31741	0.232034	2080
Q3SYJ2		Prr27	tr|Q3SYJ2|Q3SYJ2_MOUSE 4930432K09Rik protein OS=Mus musculus GN=Prr27 PE=1 SV=1	1	5	20.5	37.362	352	0	84.597	22009000	458750	7863800	3615700	3753400	4010900	1.08524	1.03173	-0.0535173	1620
Q61820	GTP-binding nuclear protein Ran, testis-specific isoform	Rasl2-9	sp|Q61820|RANT_MOUSE GTP-binding nuclear protein Ran, testis-specific isoform OS=Mus musculus GN=Rasl2-9 PE=2 SV=1	1	7	30.1	24.452	216	0.00049628	4.0534	8935900	633610	1473300	1743900	2729100	1497200	1.08259	0.0539293	-1.02866	2056
Q8K341	Alpha-tubulin N-acetyltransferase 1	Atat1	sp|Q8K341|ATAT_MOUSE Alpha-tubulin N-acetyltransferase 1 OS=Mus musculus GN=Atat1 PE=1 SV=1	1	3	9.7	47.163	421	0.00049164	3.9023	1532100	173590	118740	118820	243380	806050	1.08115	-2.69805	-3.7792	3226
Q06180	Tyrosine-protein phosphatase non-receptor type 2	Ptpn2	sp|Q06180|PTN2_MOUSE Tyrosine-protein phosphatase non-receptor type 2 OS=Mus musculus GN=Ptpn2 PE=1 SV=2	1	10	25.6	47.36	406	0	11.059	89065000	13615000	2436000	14958000	19207000	5229300	1.08047	2.62727	1.5468	1553
Q9D0C1	E3 ubiquitin-protein ligase RNF115	Rnf115	sp|Q9D0C1|RN115_MOUSE E3 ubiquitin-protein ligase RNF115 OS=Mus musculus GN=Rnf115 PE=1 SV=1	1	1	5.9	33.859	305	0	8.5779	405420	0	0	0	248630	156790	1.07216	-4.27022	-5.34238	4099
Q9Z1K6	E3 ubiquitin-protein ligase ARIH2	Arih2	sp|Q9Z1K6|ARI2_MOUSE E3 ubiquitin-protein ligase ARIH2 OS=Mus musculus GN=Arih2 PE=1 SV=1	1	3	7.9	57.696	492	0	57.604	5391200	332840	956220	1506300	1247100	737990	1.07154	-0.733321	-1.80486	4901
P09103	Protein disulfide-isomerase	P4hb	sp|P09103|PDIA1_MOUSE Protein disulfide-isomerase OS=Mus musculus GN=P4hb PE=1 SV=2	1	20	43	57.058	509	0	164.24	59328000	4563000	8356800	14387000	12623000	9938500	1.06805	2.71549	1.64745	760
P10107	Annexin A1	Anxa1	sp|P10107|ANXA1_MOUSE Annexin A1 OS=Mus musculus GN=Anxa1 PE=1 SV=2	1	8	28.3	38.734	346	0	29.791	8008200	601820	798800	1035000	3684200	668710	1.0671	-0.440263	-1.50737	775
Q9D967	Magnesium-dependent phosphatase 1	Mdp1	sp|Q9D967|MGDP1_MOUSE Magnesium-dependent phosphatase 1 OS=Mus musculus GN=Mdp1 PE=1 SV=1	1	1	7.9	18.582	164	0.0031201	2.5791	4333900	133830	1094100	700530	994490	614830	1.06677	-1.29814	-2.36491	4318
Q9EQF6	Dihydropyrimidinase-related protein 5	Dpysl5	sp|Q9EQF6|DPYL5_MOUSE Dihydropyrimidinase-related protein 5 OS=Mus musculus GN=Dpysl5 PE=1 SV=1	1	17	29.3	61.516	564	0	66.478	28218000	2115300	3857900	5221700	6519100	5230200	1.06629	1.60161	0.535318	4500
P00405	Cytochrome c oxidase subunit 2	Mtco2	sp|P00405|COX2_MOUSE Cytochrome c oxidase subunit 2 OS=Mus musculus GN=Mtco2 PE=1 SV=1	1	2	7.5	25.976	227	0.0025235	2.873	11578000	2083400	515850	1504200	1453900	3879500	1.0649	0.137858	-0.927038	690
Q9D9S4		Ctag2	tr|Q9D9S4|Q9D9S4_MOUSE Cancer/testis antigen 2 OS=Mus musculus GN=Ctag2 PE=1 SV=1	1	7	41.1	23.67	219	0	100.78	11232000	1608800	911290	2126000	4673100	1358200	1.06404	0.360998	-0.703037	4341
Q99JX3	Golgi reassembly-stacking protein 2	Gorasp2	sp|Q99JX3|GORS2_MOUSE Golgi reassembly-stacking protein 2 OS=Mus musculus GN=Gorasp2 PE=1 SV=3	1	3	8.9	47.038	451	0.00026082	4.8455	3408400	480040	308040	1152000	714730	522090	1.0614	-1.29641	-2.35781	3718
Q9WTU6;Q91Y86;Q61831	Mitogen-activated protein kinase 9;Mitogen-activated protein kinase 8;Mitogen-activated protein kinase 10	Mapk9;Mapk8;Mapk10	sp|Q9WTU6|MK09_MOUSE Mitogen-activated protein kinase 9 OS=Mus musculus GN=Mapk9 PE=1 SV=2;sp|Q91Y86|MK08_MOUSE Mitogen-activated protein kinase 8 OS=Mus musculus GN=Mapk8 PE=1 SV=1;sp|Q61831|MK10_MOUSE Mitogen-activated protein kinase 10 OS=Mus musculus G	3	3	8.3	48.189	423	0.00050839	4.436	2291500	354500	149510	582810	518970	304190	1.06015	-2.03779	-3.09793	4805
O35098	Dihydropyrimidinase-related protein 4	Dpysl4	sp|O35098|DPYL4_MOUSE Dihydropyrimidinase-related protein 4 OS=Mus musculus GN=Dpysl4 PE=1 SV=1	1	13	35.1	61.961	572	0	34.374	9412900	799390	933140	1833100	2224400	1191000	1.06	-0.130448	-1.19045	488
Q9D4V0	Ethanolamine kinase 1	Etnk1	sp|Q9D4V0|EKI1_MOUSE Ethanolamine kinase 1 OS=Mus musculus GN=Etnk1 PE=1 SV=2	1	1	3.3	41.983	363	0.00073189	3.7503	664230	0	0	151550	123340	130860	1.05817	-3.78218	-4.84035	4215
P24549;Q9CZS1	Retinal dehydrogenase 1	Aldh1a1	sp|P24549|AL1A1_MOUSE Retinal dehydrogenase 1 OS=Mus musculus GN=Aldh1a1 PE=1 SV=5	2	28	51.3	54.467	501	0	323.31	470780000	17711000	93949000	101110000	93203000	53808000	1.0557	5.42687	4.37117	910
P08003	Protein disulfide-isomerase A4	Pdia4	sp|P08003|PDIA4_MOUSE Protein disulfide-isomerase A4 OS=Mus musculus GN=Pdia4 PE=1 SV=3	1	26	41.4	71.982	638	0	102.12	27359000	1874800	4010400	5750400	6048600	4427500	1.05562	1.53184	0.47622	749
Q3TN34	MICAL-like protein 2	Micall2	sp|Q3TN34|MILK2_MOUSE MICAL-like protein 2 OS=Mus musculus GN=Micall2 PE=1 SV=1	1	4	6.5	108.29	1009	0.0029233	2.6726	433470	82297	30648	80052	151510	76684	1.04737	-4.2472	-5.29456	1651
Q8BRN9	Coiled-coil and C2 domain-containing protein 1B	Cc2d1b	sp|Q8BRN9|C2D1B_MOUSE Coiled-coil and C2 domain-containing protein 1B OS=Mus musculus GN=Cc2d1b PE=1 SV=1	1	5	6.8	93.09	848	0	7.1902	1121400	173780	101380	216440	316900	248570	1.04398	-2.84845	-3.89243	2809
Q8R149	BUD13 homolog	Bud13	sp|Q8R149|BUD13_MOUSE BUD13 homolog OS=Mus musculus GN=Bud13 PE=1 SV=1	1	4	7.2	72.138	637	0	9.7664	1461500	40602	493780	251600	517050	158490	1.04214	-2.75706	-3.7992	3292
Q9DAI6	Protein FAM135B	Fam135b	sp|Q9DAI6|F135B_MOUSE Protein FAM135B OS=Mus musculus GN=Fam135b PE=1 SV=3	1	12	11.3	155.52	1403	0	11.302	29651000	335480	222410	454670	596490	544880	1.04131	-1.80992	-2.85122	4372
Q9JHS4	ATP-dependent Clp protease ATP-binding subunit clpX-like, mitochondrial	Clpx	sp|Q9JHS4|CLPX_MOUSE ATP-dependent Clp protease ATP-binding subunit clpX-like, mitochondrial OS=Mus musculus GN=Clpx PE=1 SV=2	1	1	1.7	69.228	634	0.0047261	2.2102	3927700	357850	455920	492870	1064900	908530	1.04034	-1.24654	-2.28688	4566
Q9JLJ2	4-trimethylaminobutyraldehyde dehydrogenase	Aldh9a1	sp|Q9JLJ2|AL9A1_MOUSE 4-trimethylaminobutyraldehyde dehydrogenase OS=Mus musculus GN=Aldh9a1 PE=1 SV=1	1	10	26.5	53.514	494	0	79.331	35485000	1977800	5338700	6404300	8620800	4488200	1.03942	1.76059	0.721171	4642
Q8R3Y5	Uncharacterized protein C19orf47 homolog		sp|Q8R3Y5|CS047_MOUSE Uncharacterized protein C19orf47 homolog OS=Mus musculus PE=1 SV=2	1	2	7.5	44.41	413	0.0030932	2.5092	1874800	199890	216270	445760	703970	206450	1.03845	-2.20648	-3.24493	3347
Q8VCR7	Alpha/beta hydrolase domain-containing protein 14B	Abhd14b	sp|Q8VCR7|ABHEB_MOUSE Protein ABHD14B OS=Mus musculus GN=Abhd14b PE=1 SV=1	1	6	37.6	22.45	210	0	10.456	10992000	380950	2746900	2042500	2103200	1794000	1.03791	0.0916262	-0.946281	3400
Q6P1B1	Xaa-Pro aminopeptidase 1	Xpnpep1	sp|Q6P1B1|XPP1_MOUSE Xaa-Pro aminopeptidase 1 OS=Mus musculus GN=Xpnpep1 PE=1 SV=1	1	13	20.5	69.59	623	0	38.877	22712000	1837200	2476000	3967800	5073100	3465200	1.03724	1.15097	0.113739	2263
Q8K0G5	Protein TSSC1	Tssc1	sp|Q8K0G5|TSSC1_MOUSE Protein TSSC1 OS=Mus musculus GN=Tssc1 PE=1 SV=2	1	6	22.3	43.126	386	0	35.322	15967000	1255400	2382100	3675200	3795200	2661300	1.03647	0.847636	-0.18883	3165
O08749	Dihydrolipoyl dehydrogenase, mitochondrial	Dld	sp|O08749|DLDH_MOUSE Dihydrolipoyl dehydrogenase, mitochondrial OS=Mus musculus GN=Dld PE=1 SV=2	1	2	3.7	54.272	509	0.001848	2.9448	162050	0	0	72906	0	89146	1.03635	-3.99323	-5.02958	453
Q9WU42	Nuclear receptor corepressor 2	Ncor2	sp|Q9WU42|NCOR2_MOUSE Nuclear receptor corepressor 2 OS=Mus musculus GN=Ncor2 PE=1 SV=3	1	40	20.9	269.8	2472	0	70.091	5680800	576750	544190	827370	1750200	870690	1.03596	-0.778956	-1.81492	4814
Q9ERE7	LDLR chaperone MESD	Mesdc2	sp|Q9ERE7|MESD_MOUSE LDLR chaperone MESD OS=Mus musculus GN=Mesdc2 PE=1 SV=1	1	5	21.9	25.206	224	0	12.586	47625000	1367000	12546000	7364500	9454600	7296200	1.03478	2.10584	1.07106	4522
Q3UDW8	Heparan-alpha-glucosaminide N-acetyltransferase	Hgsnat	sp|Q3UDW8|HGNAT_MOUSE Heparan-alpha-glucosaminide N-acetyltransferase OS=Mus musculus GN=Hgsnat PE=1 SV=2	1	1	1.7	72.503	656	0.003919	2.35	622550	178730	0	249240	194580	0	1.03451	-3.78165	-4.81617	1713
Q8CD92	Tetratricopeptide repeat protein 27	Ttc27	sp|Q8CD92|TTC27_MOUSE Tetratricopeptide repeat protein 27 OS=Mus musculus GN=Ttc27 PE=1 SV=2	1	13	15.7	96.43	847	0	84.46	627590000	87772000	45408000	117890000	130110000	116070000	1.02958	6.03084	5.00126	3035
Q9DBB8	Trans-1,2-dihydrobenzene-1,2-diol dehydrogenase	Dhdh	sp|Q9DBB8|DHDH_MOUSE Trans-1,2-dihydrobenzene-1,2-diol dehydrogenase OS=Mus musculus GN=Dhdh PE=1 SV=1	1	2	6.9	36.3	333	0.00051533	4.6365	718410	0	113890	174660	116040	71998	1.02669	-4.0306	-5.05729	4416
Q8VD72	Tetratricopeptide repeat protein 8	Ttc8	sp|Q8VD72|TTC8_MOUSE Tetratricopeptide repeat protein 8 OS=Mus musculus GN=Ttc8 PE=1 SV=1	1	7	20	58.439	515	0	29.173	12347000	1543800	1305900	3136700	3023000	2119700	1.02588	0.552622	-0.473256	3410
Q8C166	Copine-1	Cpne1	sp|Q8C166|CPNE1_MOUSE Copine-1 OS=Mus musculus GN=Cpne1 PE=1 SV=1	1	3	5	58.886	536	0.0076142	2.0656	730630	0	38408	59004	162930	138400	1.02127	-4.07501	-5.09628	2935
Q8C7D2	Protein cereblon	Crbn	sp|Q8C7D2|CRBN_MOUSE Protein cereblon OS=Mus musculus GN=Crbn PE=1 SV=1	1	12	37.8	50.88	445	0	151.88	30126000	3004500	2118300	8049400	4327600	3195000	1.01969	1.37568	0.355995	2998
Q8CDN9	Leucine-rich repeat-containing protein 9	Lrrc9	sp|Q8CDN9|LRRC9_MOUSE Leucine-rich repeat-containing protein 9 OS=Mus musculus GN=Lrrc9 PE=1 SV=2	1	6	5.1	167.3	1456	0.0031306	2.6178	546690	60211	61976	110960	158210	88497	1.01153	-4.00048	-5.01201	3048
O35945	Aldehyde dehydrogenase, cytosolic 1	Aldh1a7	sp|O35945|AL1A7_MOUSE Aldehyde dehydrogenase, cytosolic 1 OS=Mus musculus GN=Aldh1a7 PE=1 SV=1	1	18	39.9	54.587	501	0	18.492	6930700	381320	1238600	1465600	1602000	939110	1.00997	-0.510163	-1.52013	540
P50516	V-type proton ATPase catalytic subunit A	Atp6v1a	sp|P50516|VATA_MOUSE V-type proton ATPase catalytic subunit A OS=Mus musculus GN=Atp6v1a PE=1 SV=2	1	20	37	68.325	617	0	175.68	30613000	2100900	4072200	5778200	7692400	3811100	1.00829	1.57768	0.569387	1113
P21460	Cystatin-C	Cst3	sp|P21460|CYTC_MOUSE Cystatin-C OS=Mus musculus GN=Cst3 PE=1 SV=2	1	2	20	15.531	140	0.00049714	4.0661	2607000	0	811920	302940	694800	409780	1.00739	-2.06884	-3.07623	883
Q9DAJ7		Tescl	tr|Q9DAJ7|Q9DAJ7_MOUSE Protein Tescl OS=Mus musculus GN=Tescl PE=2 SV=1	1	2	11.3	26.857	231	0.0053487	2.1778	8329600	897200	716610	1912400	630780	2874200	1.00515	-0.29249	-1.29764	4377
P28352	DNA-(apurinic or apyrimidinic site) lyase;DNA-(apurinic or apyrimidinic site) lyase, mitochondrial	Apex1	sp|P28352|APEX1_MOUSE DNA-(apurinic or apyrimidinic site) lyase OS=Mus musculus GN=Apex1 PE=1 SV=2	1	6	24.6	35.49	317	0	21.126	14272000	420860	4202300	2613300	3329800	1815700	1.0046	0.436871	-0.567724	937
Q9JI46	Diphosphoinositol polyphosphate phosphohydrolase 1	Nudt3	sp|Q9JI46|NUDT3_MOUSE Diphosphoinositol polyphosphate phosphohydrolase 1 OS=Mus musculus GN=Nudt3 PE=1 SV=1	1	2	14.3	19.029	168	0	21.63	12719000	422320	3197600	1811600	3337300	1739300	1.0034	0.241077	-0.762321	4576
Q9JK83;Q9Z101;Q9JK84	Partitioning defective 6 homolog beta	Pard6b	sp|Q9JK83|PAR6B_MOUSE Partitioning defective 6 homolog beta OS=Mus musculus GN=Pard6b PE=1 SV=2	3	3	8.4	41.067	371	0.00026795	5.322	2059500	243470	271670	715540	302500	526310	1.00311	-1.93504	-2.93815	4621
Q9Z2D1;Q9Z2C5	Myotubularin-related protein 2	Mtmr2	sp|Q9Z2D1|MTMR2_MOUSE Myotubularin-related protein 2 OS=Mus musculus GN=Mtmr2 PE=1 SV=3	2	8	13.4	73.231	643	0	10.621	5114100	560710	510060	1408700	1132700	641620	1.00289	-0.8791	-1.88199	4928
Q5SPL2	PHD finger protein 12	Phf12	sp|Q5SPL2|PHF12_MOUSE PHD finger protein 12 OS=Mus musculus GN=Phf12 PE=1 SV=1	1	3	4.9	109.51	1003	0.0016272	3.0407	340350	0	12787	0	40836	131830	1.00283	-5.1449	-6.14773	1900
Q9D1E6	Tubulin-folding cofactor B	Tbcb	sp|Q9D1E6|TBCB_MOUSE Tubulin-folding cofactor B OS=Mus musculus GN=Tbcb PE=1 SV=2	1	6	23	27.385	244	0	16.368	39349000	1718600	7956800	6962000	9030900	5331100	0.99817	1.90586	0.907691	4133
Q62478;B1AZA0;A6X8I0;Q4KL04;Q5M8P2;Q4KL05;Q497S0;L7MUF1;D3Z347;B1B0R1;D3Z4U6;D3YWB7;D3Z7C4		XMR;Gm14525;Gm1993;Gm5168;Gm5169;Gm10488;Gm5935;Gm6121;Slx;Gm2012;Gm5934	tr|Q62478|Q62478_MOUSE Predicted gene, ENSMUSG00000073257 OS=Mus musculus GN=XMR PE=2 SV=1;tr|B1AZA0|B1AZA0_MOUSE Protein Gm14525 OS=Mus musculus GN=Gm14525 PE=4 SV=1;tr|A6X8I0|A6X8I0_MOUSE Protein Gm1993 OS=Mus musculus GN=Gm1993 PE=4 SV=1;tr|Q4KL04|Q4KL0	13	5	38.7	24.642	212	0	13.475	15444000	771160	2980400	2182600	6001400	1759300	0.997093	0.618376	-0.378716	133
O35074	Prostacyclin synthase	Ptgis	sp|O35074|PTGIS_MOUSE Prostacyclin synthase OS=Mus musculus GN=Ptgis PE=1 SV=1	1	2	4	57.046	501	0.0043159	2.2635	1482600	229070	110620	331320	264510	303700	0.995977	-2.63427	-3.63025	486
Q9CQF9	Prenylcysteine oxidase	Pcyox1	sp|Q9CQF9|PCYOX_MOUSE Prenylcysteine oxidase OS=Mus musculus GN=Pcyox1 PE=1 SV=1	1	5	13.9	56.494	505	0	11.734	8068400	1385800	705920	2212000	1705300	1689300	0.995065	0.00019296	-0.994872	3903
Q3TYX3	SET and MYND domain-containing protein 5	Smyd5	sp|Q3TYX3|SMYD5_MOUSE SET and MYND domain-containing protein 5 OS=Mus musculus GN=Smyd5 PE=1 SV=2	1	1	2.2	47.095	416	0.0091801	1.9371	361480	0	0	112330	148420	0	0.993133	-3.69565	-4.68878	1671
Q8C5T8	Coiled-coil domain-containing protein 113	Ccdc113	sp|Q8C5T8|CC113_MOUSE Coiled-coil domain-containing protein 113 OS=Mus musculus GN=Ccdc113 PE=2 SV=1	1	2	6.6	44.214	377	0.0053442	2.1727	704610	0	122320	332170	123210	74004	0.987726	-3.67943	-4.66716	2975
P45878	Peptidyl-prolyl cis-trans isomerase FKBP2	Fkbp2	sp|P45878|FKBP2_MOUSE Peptidyl-prolyl cis-trans isomerase FKBP2 OS=Mus musculus GN=Fkbp2 PE=1 SV=1	1	1	8.6	15.344	140	0.0018497	2.9537	8722500	425930	1727400	1285500	2209800	1440600	0.987607	-0.212769	-1.20038	1044
Q8R317	Ubiquilin-1	Ubqln1	sp|Q8R317|UBQL1_MOUSE Ubiquilin-1 OS=Mus musculus GN=Ubqln1 PE=1 SV=1	1	8	19.9	61.976	582	0	63.122	17466000	984200	2959600	3773000	3879800	2196200	0.986301	0.778494	-0.207808	3323
Q62446	Peptidyl-prolyl cis-trans isomerase FKBP3	Fkbp3	sp|Q62446|FKBP3_MOUSE Peptidyl-prolyl cis-trans isomerase FKBP3 OS=Mus musculus GN=Fkbp3 PE=1 SV=2	1	9	37.1	25.147	224	0	128.64	102880000	5644200	19934000	19315000	27147000	14653000	0.984148	3.41209	2.42794	2115
Q8BHA0	INO80 complex subunit C	Ino80c	sp|Q8BHA0|IN80C_MOUSE INO80 complex subunit C OS=Mus musculus GN=Ino80c PE=1 SV=1	1	2	12.6	20.405	191	0.00051626	4.6568	2865900	253570	496530	755100	584850	649610	0.982916	-1.4909	-2.47382	2687
P83917	Chromobox protein homolog 1	Cbx1	sp|P83917|CBX1_MOUSE Chromobox protein homolog 1 OS=Mus musculus GN=Cbx1 PE=1 SV=1	1	2	14.6	21.418	185	0	12.981	3894800	836200	265560	620390	1399100	773550	0.982535	-1.08197	-2.06451	1435
Q60902	Epidermal growth factor receptor substrate 15-like 1	Eps15l1	sp|Q60902|EP15R_MOUSE Epidermal growth factor receptor substrate 15-like 1 OS=Mus musculus GN=Eps15l1 PE=1 SV=3	1	3	3.3	99.307	907	0.00072922	3.6992	1475700	113410	95984	1024900	89091	79617	0.981376	-3.25837	-4.23974	1975
Q9D5V6	Synapse-associated protein 1	Syap1	sp|Q9D5V6|SYAP1_MOUSE Synapse-associated protein 1 OS=Mus musculus GN=Syap1 PE=1 SV=1	1	8	24.1	41.349	365	0	24.1	8644100	537930	1677900	2195300	1631100	1531500	0.980942	-0.0720046	-1.05295	4240
Q9D495	Synaptonemal complex central element protein 1	Syce1	sp|Q9D495|SYCE1_MOUSE Synaptonemal complex central element protein 1 OS=Mus musculus GN=Syce1 PE=1 SV=1	1	11	40.7	38.205	329	0	110.11	25772000	4061500	1711900	4673900	5851800	4256700	0.977555	1.39734	0.419785	4199
P45591	Cofilin-2	Cfl2	sp|P45591|COF2_MOUSE Cofilin-2 OS=Mus musculus GN=Cfl2 PE=1 SV=1	1	6	44	18.709	166	0	34.79	39110000	1934900	6544200	5605200	10022000	5074400	0.975743	1.82796	0.852217	1043
P63242;Q8BGY2	Eukaryotic translation initiation factor 5A-1;Eukaryotic translation initiation factor 5A-2	Eif5a;Eif5a2	sp|P63242|IF5A1_MOUSE Eukaryotic translation initiation factor 5A-1 OS=Mus musculus GN=Eif5a PE=1 SV=2;sp|Q8BGY2|IF5A2_MOUSE Eukaryotic translation initiation factor 5A-2 OS=Mus musculus GN=Eif5a2 PE=1 SV=3	2	12	55.8	16.832	154	0	122.81	352640000	19465000	62988000	64288000	87973000	47928000	0.974794	5.12568	4.15089	1364
P70460	Vasodilator-stimulated phosphoprotein	Vasp	sp|P70460|VASP_MOUSE Vasodilator-stimulated phosphoprotein OS=Mus musculus GN=Vasp PE=1 SV=4	1	2	12.5	39.666	375	0.0027113	2.7233	1154000	140610	97357	93075	326140	332760	0.974231	-3.10019	-4.07442	1415
Q3U2V3	8-oxo-dGDP phosphatase NUDT18	Nudt18	sp|Q3U2V3|NUD18_MOUSE 8-oxo-dGDP phosphatase NUDT18 OS=Mus musculus GN=Nudt18 PE=1 SV=1	1	10	36.8	35.693	323	0	67.594	25979000	1850800	3500100	4547900	6015100	3794700	0.973433	1.34218	0.368752	1688
P49182	Heparin cofactor 2	Serpind1	sp|P49182|HEP2_MOUSE Heparin cofactor 2 OS=Mus musculus GN=Serpind1 PE=1 SV=1	1	2	4.2	54.496	478	0.0018579	3.0236	558530	0	113720	110960	119340	87426	0.972321	-4.14192	-5.11424	1096
Q69ZL1	FYVE, RhoGEF and PH domain-containing protein 6	Fgd6	sp|Q69ZL1|FGD6_MOUSE FYVE, RhoGEF and PH domain-containing protein 6 OS=Mus musculus GN=Fgd6 PE=1 SV=2	1	2	1.9	155.17	1399	0.0027279	2.7723	292670	6727.8	32124	44025	27914	16239	0.972275	-6.09467	-7.06695	2181
P60521	Gamma-aminobutyric acid receptor-associated protein-like 2	Gabarapl2	sp|P60521|GBRL2_MOUSE Gamma-aminobutyric acid receptor-associated protein-like 2 OS=Mus musculus GN=Gabarapl2 PE=1 SV=1	1	5	35.9	13.667	117	0	8.6164	50279000	2775900	9338800	6784900	15414000	7885800	0.969768	2.33884	1.36908	1230
Q9DBD0	Inhibitor of carbonic anhydrase	Ica	sp|Q9DBD0|ICA_MOUSE Inhibitor of carbonic anhydrase OS=Mus musculus GN=Ica PE=1 SV=1	1	5	7.6	76.765	700	0.0039046	2.3029	400280	0	39542	67761	98415	74108	0.964674	-4.55128	-5.51595	4420
Q9QZE7	Translin-associated protein X	Tsnax	sp|Q9QZE7|TSNAX_MOUSE Translin-associated protein X OS=Mus musculus GN=Tsnax PE=1 SV=1	1	9	39	32.926	290	0	50.364	37232000	904680	11086000	6169700	8075500	3825400	0.950328	1.63438	0.684052	4739
Q91X84	CREB-regulated transcription coactivator 3	Crtc3	sp|Q91X84|CRTC3_MOUSE CREB-regulated transcription coactivator 3 OS=Mus musculus GN=Crtc3 PE=1 SV=2	1	3	8.7	67.026	619	0.00026638	5.2513	2105300	217940	235060	243580	744680	383140	0.949762	-2.17271	-3.12247	3560
F8VPZ3	Ubiquitin carboxyl-terminal hydrolase	Usp32	tr|F8VPZ3|F8VPZ3_MOUSE Protein Usp32 OS=Mus musculus GN=Usp32 PE=1 SV=1	1	6	3.9	181.73	1604	0.00028185	6.3045	2475300	201540	402750	884490	742360	210460	0.948308	-1.84217	-2.79047	389
Q9DAD6	Profilin-3	Pfn3	sp|Q9DAD6|PROF3_MOUSE Profilin-3 OS=Mus musculus GN=Pfn3 PE=1 SV=1	1	4	32.1	14.697	137	0.00026976	5.4577	9026800	906130	1062000	1511000	2466100	1505400	0.94562	-0.0611137	-1.00673	4366
P00342	L-lactate dehydrogenase C chain	Ldhc	sp|P00342|LDHC_MOUSE L-lactate dehydrogenase C chain OS=Mus musculus GN=Ldhc PE=1 SV=2	1	23	69.6	35.911	332	0	323.31	7773300000	354620000	1620600000	1410400000	1650200000	1111200000	0.94513	9.53233	8.5872	689
Q9CWH6	Proteasome subunit alpha type-7-like	Psma8	sp|Q9CWH6|PSA7L_MOUSE Proteasome subunit alpha type-7-like OS=Mus musculus GN=Psma8 PE=1 SV=1	1	11	50.4	27.866	250	0	220.7	193340000	10530000	39601000	38307000	46587000	28154000	0.942217	4.31515	3.37293	3993
Q9WVM1	Rac GTPase-activating protein 1	Racgap1	sp|Q9WVM1|RGAP1_MOUSE Rac GTPase-activating protein 1 OS=Mus musculus GN=Racgap1 PE=1 SV=1	1	4	7.6	70.158	628	0.00049801	4.0981	1387500	218190	120100	308880	413580	195020	0.939981	-2.66606	-3.60604	4858
Q7TNE3	Sperm-associated antigen 7	Spag7	sp|Q7TNE3|SPAG7_MOUSE Sperm-associated antigen 7 OS=Mus musculus GN=Spag7 PE=1 SV=1	1	4	25.6	25.921	227	0	7.0385	9672600	450980	2282500	1408400	2426600	1768200	0.93283	-0.0253159	-0.958146	2456
Q3UJP5	Protein C8orf37 homolog		sp|Q3UJP5|CH037_MOUSE Protein C8orf37 homolog OS=Mus musculus PE=1 SV=1	1	1	7.2	23.848	209	0	7.6554	2572100	328850	258410	470150	679460	447440	0.93147	-1.82593	-2.7574	1748
B8JKV0		Amn1	tr|B8JKV0|B8JKV0_MOUSE Protein Amn1 OS=Mus musculus GN=Amn1 PE=1 SV=1	1	5	22.9	28.466	258	0	31.77	30204000	3404400	3212200	5014000	8077300	5123400	0.928778	1.67524	0.74646	184
P10493	Nidogen-1	Nid1	sp|P10493|NID1_MOUSE Nidogen-1 OS=Mus musculus GN=Nid1 PE=1 SV=2	1	16	14.6	136.54	1245	0	16.24	3943200	221470	908270	488270	762420	1390200	0.928659	-1.20717	-2.13583	777
Q9JHS9	Spliceosome-associated protein CWC15 homolog	Cwc15	sp|Q9JHS9|CWC15_MOUSE Spliceosome-associated protein CWC15 homolog OS=Mus musculus GN=Cwc15 PE=1 SV=1	1	3	14	26.624	229	0	12.519	11277000	774810	2267000	1930400	2979100	2296500	0.923336	0.350664	-0.572672	4567
Q8BNU0	Armadillo repeat-containing protein 6	Armc6	sp|Q8BNU0|ARMC6_MOUSE Armadillo repeat-containing protein 6 OS=Mus musculus GN=Armc6 PE=1 SV=1	1	2	4.5	50.683	468	0.0030635	2.4165	2067400	150580	139940	1324500	46807	279050	0.921843	-2.84144	-3.76328	2775
Q61189	Methylosome subunit pICln	Clns1a	sp|Q61189|ICLN_MOUSE Methylosome subunit pICln OS=Mus musculus GN=Clns1a PE=1 SV=1	1	1	5.5	26.021	236	0	10.831	5675000	250420	1216400	1026300	1404300	658660	0.921063	-0.915438	-1.8365	2006
Q9D5T7	HORMA domain-containing protein 1	Hormad1	sp|Q9D5T7|HORM1_MOUSE HORMA domain-containing protein 1 OS=Mus musculus GN=Hormad1 PE=1 SV=1	1	3	8.7	44.933	392	0.00050684	4.3981	1914900	463640	0	378900	718500	243120	0.920654	-2.19618	-3.11683	4233
Q61211	Eukaryotic translation initiation factor 2D	Eif2d	sp|Q61211|EIF2D_MOUSE Eukaryotic translation initiation factor 2D OS=Mus musculus GN=Eif2d PE=1 SV=3	1	2	4.9	62.829	570	0.0025224	2.8635	477440	58614	60959	100050	136980	87899	0.920534	-4.1228	-5.04333	2013
Q62348	Translin	Tsn	sp|Q62348|TSN_MOUSE Translin OS=Mus musculus GN=Tsn PE=1 SV=1	1	11	43	26.201	228	0	286.84	191050000	5989400	51501000	35721000	41325000	20655000	0.919497	4.07495	3.15545	2099
P29595	NEDD8	Nedd8	sp|P29595|NEDD8_MOUSE NEDD8 OS=Mus musculus GN=Nedd8 PE=1 SV=2	1	3	34.6	8.9723	81	0	41.323	52804000	2585500	10765000	11830000	10272000	6768300	0.917193	2.33753	1.42034	955
Q6VSS7		Rhox8	tr|Q6VSS7|Q6VSS7_MOUSE Protein Rhox8 OS=Mus musculus GN=Rhox8 PE=1 SV=1	1	4	15	35.898	320	0	34.365	23683000	1775500	4050700	5016800	5758400	3711900	0.913613	1.35779	0.444178	2370
Q7TQI3	Ubiquitin thioesterase OTUB1	Otub1	sp|Q7TQI3|OTUB1_MOUSE Ubiquitin thioesterase OTUB1 OS=Mus musculus GN=Otub1 PE=1 SV=2	1	11	44.6	31.27	271	0	132.5	81847000	5057800	13243000	15224000	20005000	9905400	0.908706	2.96252	2.05381	2469
Q5ND04;Q80Y37	Heat shock factor protein 5	Hsf5	sp|Q5ND04|HSF5_MOUSE Heat shock factor protein 5 OS=Mus musculus GN=Hsf5 PE=1 SV=1	2	5	11.1	67.315	624	0.0002777	5.9647	2862900	568330	176620	327270	1049300	509270	0.908347	-1.72891	-2.63726	1889
Q99L04	Dehydrogenase/reductase SDR family member 1	Dhrs1	sp|Q99L04|DHRS1_MOUSE Dehydrogenase/reductase SDR family member 1 OS=Mus musculus GN=Dhrs1 PE=1 SV=1	1	10	28.4	34.005	313	0	31.375	12361000	2126900	1069100	2533000	2743600	2703200	0.906567	0.520121	-0.386446	3753
Q91ZR1	Ras-related protein Rab-4B	Rab4b	sp|Q91ZR1|RAB4B_MOUSE Ras-related protein Rab-4B OS=Mus musculus GN=Rab4b PE=1 SV=2	1	9	50.2	23.629	213	0	42.768	25225000	1777200	3909000	4575600	10976000	1997200	0.906484	1.32567	0.419183	3607
Q9D9Q6	Calreticulin-3	Calr3	sp|Q9D9Q6|CALR3_MOUSE Calreticulin-3 OS=Mus musculus GN=Calr3 PE=1 SV=2	1	7	19.2	44.231	380	0	24.989	11942000	2117100	1076700	3377500	1834700	3041300	0.906323	0.521656	-0.384667	4339
Q60676	Serine/threonine-protein phosphatase 5	Ppp5c	sp|Q60676|PPP5_MOUSE Serine/threonine-protein phosphatase 5 OS=Mus musculus GN=Ppp5c PE=1 SV=3	1	11	25.9	56.876	499	0	23.796	15936000	1325200	2197700	3341200	3157000	2572500	0.904875	0.696956	-0.207919	1950
Q91WE2	Protein FAM192A	Fam192a	sp|Q91WE2|F192A_MOUSE Protein FAM192A OS=Mus musculus GN=Fam192a PE=1 SV=1	1	4	16.9	28.702	254	0.00026062	4.8367	3610500	246180	703140	700360	1096200	508900	0.901823	-1.34236	-2.24419	3536
Q8K358	Phosphatidylinositol glycan anchor biosynthesis class U protein	Pigu	sp|Q8K358|PIGU_MOUSE Phosphatidylinositol glycan anchor biosynthesis class U protein OS=Mus musculus GN=Pigu PE=1 SV=4	1	2	4.8	49.804	434	0.00093589	3.1393	2447300	115240	734620	714220	351260	531970	0.901211	-1.85892	-2.76013	3228
Q9D9C0		1700109H08Rik	tr|Q9D9C0|Q9D9C0_MOUSE Protein 1700109H08Rik OS=Mus musculus GN=1700109H08Rik PE=2 SV=1	1	3	12.9	24.247	210	0.0027223	2.7553	2321700	402850	194620	325150	749740	487600	0.900893	-1.9146	-2.8155	4320
Q9Z1S0	Mitotic checkpoint serine/threonine-protein kinase BUB1 beta	Bub1b	sp|Q9Z1S0|BUB1B_MOUSE Mitotic checkpoint serine/threonine-protein kinase BUB1 beta OS=Mus musculus GN=Bub1b PE=1 SV=2	1	30	33.7	118.39	1052	0	125.7	14986000	1521100	1597300	2165800	3495100	2708800	0.900867	0.562222	-0.338645	4910
Q7TMY7	Importin-8	Ipo8	sp|Q7TMY7|IPO8_MOUSE Importin-8 OS=Mus musculus GN=Ipo8 PE=1 SV=3	1	2	3	117.08	1010	0.00026205	4.9105	393090	0	0	0	0	393090	0.899972	-3.78918	-4.68915	2446
E9PZP8		Herc1	tr|E9PZP8|E9PZP8_MOUSE Protein Herc1 OS=Mus musculus GN=Herc1 PE=1 SV=1	1	9	2.1	532.65	4859	0	7.1517	499440	61656	43360	59719	51599	239280	0.893696	-4.35888	-5.25257	301
Q4U2R1	E3 ubiquitin-protein ligase HERC2	Herc2	sp|Q4U2R1|HERC2_MOUSE E3 ubiquitin-protein ligase HERC2 OS=Mus musculus GN=Herc2 PE=1 SV=3	1	71	17.2	527.45	4836	0	224.9	13257000	1310300	1120100	2834200	1898600	1749700	0.890179	0.187921	-0.702258	1839
Q3V1L4	Cytosolic purine 5-nucleotidase	Nt5c2	sp|Q3V1L4|5NTC_MOUSE Cytosolic purine 5-nucleotidase OS=Mus musculus GN=Nt5c2 PE=1 SV=2	1	8	16.2	64.808	560	0	22.866	10947000	753120	1697800	2013500	2382700	1594000	0.889623	0.0879107	-0.801712	1819
Q80V26	Inositol monophosphatase 3	Impad1	sp|Q80V26|IMPA3_MOUSE Inositol monophosphatase 3 OS=Mus musculus GN=Impad1 PE=1 SV=1	1	3	10.1	38.616	356	0	12.925	2050100	452000	139500	366160	476260	480150	0.889556	-2.0831	-2.97266	2530
A2A5R2	Brefeldin A-inhibited guanine nucleotide-exchange protein 2	Arfgef2	sp|A2A5R2|BIG2_MOUSE Brefeldin A-inhibited guanine nucleotide-exchange protein 2 OS=Mus musculus GN=Arfgef2 PE=1 SV=1	1	38	24.7	202.24	1792	0	153.2	30696000	4369500	3691500	6389200	6396200	8351300	0.887726	1.91454	1.02682	52
F8VPN2		Tex15	sp|F8VPN2|TEX15_MOUSE Testis-expressed sequence 15 protein OS=Mus musculus GN=Tex15 PE=2 SV=1	1	3	1.4	311.28	2785	0.00050302	4.2774	1145800	197630	16299	0	12642	908090	0.886844	-4.23128	-5.11812	383
Q91YW3	DnaJ homolog subfamily C member 3	Dnajc3	sp|Q91YW3|DNJC3_MOUSE DnaJ homolog subfamily C member 3 OS=Mus musculus GN=Dnajc3 PE=1 SV=1	1	14	30.4	57.463	504	0	29.076	24466000	2558900	3726200	5929200	4702100	5552400	0.886751	1.53434	0.647593	3596
P26638	Serine--tRNA ligase, cytoplasmic	Sars	sp|P26638|SYSC_MOUSE Serine--tRNA ligase, cytoplasmic OS=Mus musculus GN=Sars PE=1 SV=3	1	10	22.5	58.388	512	0	17.657	11851000	834280	1677900	1383500	2928600	2134000	0.883348	0.146957	-0.736391	924
Q9WUB4	Dynactin subunit 6	Dctn6	sp|Q9WUB4|DCTN6_MOUSE Dynactin subunit 6 OS=Mus musculus GN=Dctn6 PE=1 SV=1	1	3	21.6	20.67	190	0.0002666	5.2569	25759000	1671700	4683500	3934800	5951600	4874200	0.882407	1.38784	0.50543	4823
Q8JZK9	Hydroxymethylglutaryl-CoA synthase, cytoplasmic	Hmgcs1	sp|Q8JZK9|HMCS1_MOUSE Hydroxymethylglutaryl-CoA synthase, cytoplasmic OS=Mus musculus GN=Hmgcs1 PE=1 SV=1	1	2	4.2	57.568	520	0.0045268	2.2481	999200	34486	214260	195640	299400	56314	0.880838	-3.63839	-4.51923	3143
P56376	Acylphosphatase-1	Acyp1	sp|P56376|ACYP1_MOUSE Acylphosphatase-1 OS=Mus musculus GN=Acyp1 PE=1 SV=2	1	6	71.7	11.241	99	0	130.48	495960000	26036000	98793000	74833000	132490000	68031000	0.878715	5.56408	4.68537	1181
Q9D6Y9	1,4-alpha-glucan-branching enzyme	Gbe1	sp|Q9D6Y9|GLGB_MOUSE 1,4-alpha-glucan-branching enzyme OS=Mus musculus GN=Gbe1 PE=1 SV=1	1	9	16.7	80.363	702	0	26.472	4221900	542460	342010	676000	972620	627260	0.877823	-1.31635	-2.19417	4253
Q8BYA0	Tubulin-specific chaperone D	Tbcd	sp|Q8BYA0|TBCD_MOUSE Tubulin-specific chaperone D OS=Mus musculus GN=Tbcd PE=1 SV=1	1	5	4.6	133.32	1196	0.00027685	5.907	910550	132720	89717	152690	176380	248170	0.876233	-3.2988	-4.17503	2888
O08709	Peroxiredoxin-6	Prdx6	sp|O08709|PRDX6_MOUSE Peroxiredoxin-6 OS=Mus musculus GN=Prdx6 PE=1 SV=3	1	15	75.9	24.87	224	0	323.31	289700000	18872000	52168000	59218000	67511000	39626000	0.874775	4.86739	3.99261	449
Q9DB20	ATP synthase subunit O, mitochondrial	Atp5o	sp|Q9DB20|ATPO_MOUSE ATP synthase subunit O, mitochondrial OS=Mus musculus GN=Atp5o PE=1 SV=1	1	3	16.9	23.363	213	0.00026364	5.0292	6806000	1288100	477620	3122400	600890	1316900	0.874014	-0.455416	-1.32943	4401
Q8N9S3	Activator of 90 kDa heat shock protein ATPase homolog 2	Ahsa2	sp|Q8N9S3|AHSA2_MOUSE Activator of 90 kDa heat shock protein ATPase homolog 2 OS=Mus musculus GN=Ahsa2 PE=1 SV=2	1	3	9.4	37.648	331	0.00094473	3.2647	1081300	181210	90002	271960	258450	150960	0.871583	-3.07652	-3.9481	3264
Q9D5U8	Cyclic nucleotide-binding domain-containing protein 2	Cnbd2	sp|Q9D5U8|CNBD2_MOUSE Cyclic nucleotide-binding domain-containing protein 2 OS=Mus musculus GN=Cnbd2 PE=1 SV=2	1	10	17.4	77.891	673	0	15.6	4715400	630670	522110	1187600	1235800	653490	0.869833	-0.910497	-1.78033	4235
Q9WTK7	Serine/threonine-protein kinase STK11	Stk11	sp|Q9WTK7|STK11_MOUSE Serine/threonine-protein kinase STK11 OS=Mus musculus GN=Stk11 PE=1 SV=1	1	4	12.8	49.266	436	0	7.8575	3524500	301280	512070	517650	948940	625120	0.869032	-1.45819	-2.32723	4799
Q9Z1Q5	Chloride intracellular channel protein 1	Clic1	sp|Q9Z1Q5|CLIC1_MOUSE Chloride intracellular channel protein 1 OS=Mus musculus GN=Clic1 PE=1 SV=3	1	5	24.5	27.013	241	0	15.866	14838000	1259100	1845400	2874700	2675200	2309900	0.864079	0.493222	-0.370857	4907
P27773	Protein disulfide-isomerase A3	Pdia3	sp|P27773|PDIA3_MOUSE Protein disulfide-isomerase A3 OS=Mus musculus GN=Pdia3 PE=1 SV=2	1	33	58.8	56.678	505	0	323.31	292720000	22364000	47658000	67281000	54784000	47300000	0.863596	4.91345	4.04986	933
Q09XV5	Chromodomain-helicase-DNA-binding protein 8	Chd8	sp|Q09XV5|CHD8_MOUSE Chromodomain-helicase-DNA-binding protein 8 OS=Mus musculus GN=Chd8 PE=1 SV=1	1	6	3	290.84	2582	0.00026596	5.212	580690	80185	64777	61367	145100	209370	0.86068	-3.91279	-4.77347	1571
Q9WUM5	Succinyl-CoA ligase [ADP/GDP-forming] subunit alpha, mitochondrial	Suclg1	sp|Q9WUM5|SUCA_MOUSE Succinyl-CoA ligase [ADP/GDP-forming] subunit alpha, mitochondrial OS=Mus musculus GN=Suclg1 PE=1 SV=4	1	4	15.9	36.154	346	0	10.656	8526300	1054900	1163000	1417700	3097800	1537300	0.859533	0.0279913	-0.831542	4830
Q6PCQ0	IQ domain-containing protein E	Iqce	sp|Q6PCQ0|IQCE_MOUSE IQ domain-containing protein E OS=Mus musculus GN=Iqce PE=1 SV=1	1	12	18.1	86.355	778	0	33.937	14182000	1250700	2113800	4152500	2632400	1952300	0.85917	0.581437	-0.277733	2314
Q9JM93	ADP-ribosylation factor-like protein 6-interacting protein 4	Arl6ip4	sp|Q9JM93|AR6P4_MOUSE ADP-ribosylation factor-like protein 6-interacting protein 4 OS=Mus musculus GN=Arl6ip4 PE=1 SV=1	1	3	21	25.524	229	0	7.1011	4419500	215280	1277000	668330	1583900	674930	0.858398	-1.0521	-1.9105	4653
P70388	DNA repair protein RAD50	Rad50	sp|P70388|RAD50_MOUSE DNA repair protein RAD50 OS=Mus musculus GN=Rad50 PE=1 SV=1	1	8	6.3	153.49	1312	0	7.3913	1994000	302720	196580	426310	754360	221970	0.85457	-2.15983	-3.0144	1406
Q9D0F9	Phosphoglucomutase-1	Pgm1	sp|Q9D0F9|PGM1_MOUSE Phosphoglucomutase-1 OS=Mus musculus GN=Pgm1 PE=1 SV=4	1	17	35.2	61.417	562	0	39.641	12545000	582150	2550200	2369100	2320300	1615000	0.853638	0.159654	-0.693984	4105
Q3UFS0	Protein zyg-11 homolog B	Zyg11b	sp|Q3UFS0|ZY11B_MOUSE Protein zyg-11 homolog B OS=Mus musculus GN=Zyg11b PE=1 SV=2	1	6	9.3	83.99	744	0	8.2782	1405600	297790	89743	223640	328150	290430	0.850771	-2.74109	-3.59187	1718
O55026	Ectonucleoside triphosphate diphosphohydrolase 2	Entpd2	sp|O55026|ENTP2_MOUSE Ectonucleoside triphosphate diphosphohydrolase 2 OS=Mus musculus GN=Entpd2 PE=1 SV=2	1	5	11.7	54.319	495	0	11.467	8199000	1866700	418620	1269300	1439500	1839400	0.849458	-0.307462	-1.15692	569
P62814;Q91YH6	V-type proton ATPase subunit B, brain isoform	Atp6v1b2	sp|P62814|VATB2_MOUSE V-type proton ATPase subunit B, brain isoform OS=Mus musculus GN=Atp6v1b2 PE=1 SV=1	2	8	17.4	56.55	511	0	65.7	17269000	1614000	2330100	4141700	4168600	2055000	0.849405	0.825901	-0.0235043	1318
Q9QZ06	Toll-interacting protein	Tollip	sp|Q9QZ06|TOLIP_MOUSE Toll-interacting protein OS=Mus musculus GN=Tollip PE=1 SV=1	1	7	30.3	30.345	274	0	34.614	22487000	2932900	2578600	3052700	5599400	5908500	0.848539	1.32898	0.480437	4728
Q9D898	Actin-related protein 2/3 complex subunit 5-like protein	Arpc5l	sp|Q9D898|ARP5L_MOUSE Actin-related protein 2/3 complex subunit 5-like protein OS=Mus musculus GN=Arpc5l PE=1 SV=1	1	3	28.8	16.98	153	0	22.13	11547000	733830	2311700	2512500	2961300	1439000	0.847518	0.249733	-0.597785	4288
Q9R0Q7	Prostaglandin E synthase 3	Ptges3	sp|Q9R0Q7|TEBP_MOUSE Prostaglandin E synthase 3 OS=Mus musculus GN=Ptges3 PE=1 SV=1	1	7	41.9	18.721	160	0	142.19	107040000	8106500	16027000	16089000	34562000	12865000	0.846022	3.37776	2.53174	4771
Q8CFK2	Transcription factor IIIB 90 kDa subunit	Brf1	sp|Q8CFK2|TF3B_MOUSE Transcription factor IIIB 90 kDa subunit OS=Mus musculus GN=Brf1 PE=1 SV=1	1	1	1.5	73.798	676	0.0031257	2.6008	336560	56125	30280	55012	94176	65124	0.84454	-4.73483	-5.57937	3067
C6KI89;E9Q355	Cation channel sperm-associated protein subunit gamma 2;Cation channel sperm-associated protein subunit gamma 1	Catsperg2;Catsperg1	sp|C6KI89|CTSG2_MOUSE Cation channel sperm-associated protein subunit gamma 2 OS=Mus musculus GN=Catsperg2 PE=1 SV=1;sp|E9Q355|CTSG1_MOUSE Cation channel sperm-associated protein subunit gamma 1 OS=Mus musculus GN=Catsperg1 PE=2 SV=1	2	5	5.7	131.42	1145	0.00049579	4.03	692340	115690	67618	154150	119410	180780	0.843905	-3.63417	-4.47808	192
Q99P31	Hsp70-binding protein 1	Hspbp1	sp|Q99P31|HPBP1_MOUSE Hsp70-binding protein 1 OS=Mus musculus GN=Hspbp1 PE=1 SV=1	1	4	14.6	39.166	357	0	12.897	13073000	1709200	1386000	3018700	3159900	1833000	0.842493	0.485597	-0.356896	3816
P62257	Ubiquitin-conjugating enzyme E2 H	Ube2h	sp|P62257|UBE2H_MOUSE Ubiquitin-conjugating enzyme E2 H OS=Mus musculus GN=Ube2h PE=1 SV=1	1	3	18.6	20.655	183	0.00051361	4.5994	8914100	425210	2090600	1534800	2295700	1138200	0.841444	-0.222494	-1.06394	1286
Q6P1F6	Serine/threonine-protein phosphatase 2A 55 kDa regulatory subunit B alpha isoform	Ppp2r2a	sp|Q6P1F6|2ABA_MOUSE Serine/threonine-protein phosphatase 2A 55 kDa regulatory subunit B alpha isoform OS=Mus musculus GN=Ppp2r2a PE=1 SV=1	1	12	35.1	51.691	447	0	64.673	34952000	3335600	5636600	7009900	8412000	6610800	0.841116	1.97848	1.13737	2265
Q8K157	Aldose 1-epimerase	Galm	sp|Q8K157|GALM_MOUSE Aldose 1-epimerase OS=Mus musculus GN=Galm PE=1 SV=1	1	4	15.5	37.798	342	0.00027115	5.5646	5083000	0	1329100	887260	1101200	617050	0.833623	-1.13375	-1.96738	3174
Q9CQ48	NudC domain-containing protein 2	Nudcd2	sp|Q9CQ48|NUDC2_MOUSE NudC domain-containing protein 2 OS=Mus musculus GN=Nudcd2 PE=1 SV=1	1	2	13.4	17.66	157	0.0013989	3.0926	4215500	0	898370	757690	1691500	0	0.832996	-1.84793	-2.68093	3874
Q9QUM9	Proteasome subunit alpha type-6	Psma6	sp|Q9QUM9|PSA6_MOUSE Proteasome subunit alpha type-6 OS=Mus musculus GN=Psma6 PE=1 SV=1	1	8	39	27.372	246	0	124.08	102830000	4334600	25391000	15892000	24764000	13707000	0.829954	3.24201	2.41205	4667
Q9QZ08	N-acetyl-D-glucosamine kinase	Nagk	sp|Q9QZ08|NAGK_MOUSE N-acetyl-D-glucosamine kinase OS=Mus musculus GN=Nagk PE=1 SV=3	1	10	37.3	37.268	343	0	55.424	27866000	1576500	5474000	5478200	6632800	3254900	0.829264	1.4049	0.57564	4729
P53996	Cellular nucleic acid-binding protein	Cnbp	sp|P53996|CNBP_MOUSE Cellular nucleic acid-binding protein OS=Mus musculus GN=Cnbp PE=1 SV=2	1	8	49.4	19.592	178	0	105.98	61759000	2116600	15229000	5984900	16867000	8428600	0.827615	2.35384	1.52623	1154
Q61037	Tuberin	Tsc2	sp|Q61037|TSC2_MOUSE Tuberin OS=Mus musculus GN=Tsc2 PE=1 SV=1	1	8	5.3	202.07	1814	0	11.673	806250	166370	61902	144060	202740	166320	0.827473	-3.45225	-4.27972	1991
P62141	Serine/threonine-protein phosphatase PP1-beta catalytic subunit	Ppp1cb	sp|P62141|PP1B_MOUSE Serine/threonine-protein phosphatase PP1-beta catalytic subunit OS=Mus musculus GN=Ppp1cb PE=1 SV=3	1	13	43.1	37.186	327	0	114.18	75259000	4469700	15112000	14077000	19526000	9343600	0.825235	2.88512	2.05988	1280
Q61599	Rho GDP-dissociation inhibitor 2	Arhgdib	sp|Q61599|GDIR2_MOUSE Rho GDP-dissociation inhibitor 2 OS=Mus musculus GN=Arhgdib PE=1 SV=3	1	2	15	22.851	200	0.0014002	3.0997	6468600	235470	1549300	656080	2076300	747400	0.824635	-0.88177	-1.7064	2045
Q9D5V1		Actl11	tr|Q9D5V1|Q9D5V1_MOUSE Protein Actl11 OS=Mus musculus GN=Actl11 PE=2 SV=1	1	11	12	130.8	1207	0	12.332	4127800	592390	413230	696950	1219600	657070	0.82368	-1.17052	-1.9942	4237
P63011	Ras-related protein Rab-3A	Rab3a	sp|P63011|RAB3A_MOUSE Ras-related protein Rab-3A OS=Mus musculus GN=Rab3a PE=1 SV=1	1	3	17.7	24.97	220	0.0018544	2.9902	3734300	511710	494260	1088500	810420	659970	0.820094	-1.15056	-1.97065	1349
O09046	L-amino-acid oxidase	Il4i1	sp|O09046|OXLA_MOUSE L-amino-acid oxidase OS=Mus musculus GN=Il4i1 PE=1 SV=1	1	9	16	70.19	630	0	11.33	4821300	394890	785200	1174000	1013800	662730	0.819185	-1.00451	-1.82369	471
Q9JJN4;Q9ESL0	Succinyl-CoA:3-ketoacid coenzyme A transferase 2A, mitochondrial;Succinyl-CoA:3-ketoacid coenzyme A transferase 2B, mitochondrial	Oxct2a;Oxct2b	sp|Q9JJN4|SCO2A_MOUSE Succinyl-CoA:3-ketoacid coenzyme A transferase 2A, mitochondrial OS=Mus musculus GN=Oxct2a PE=2 SV=2;sp|Q9ESL0|SCO2B_MOUSE Succinyl-CoA:3-ketoacid coenzyme A transferase 2B, mitochondrial OS=Mus musculus GN=Oxct2b PE=2 SV=1	2	4	9	56.472	520	0.00027042	5.4976	1862900	278670	197180	629010	486540	191970	0.818419	-2.25349	-3.07191	4548
Q9JKR6	Hypoxia up-regulated protein 1	Hyou1	sp|Q9JKR6|HYOU1_MOUSE Hypoxia up-regulated protein 1 OS=Mus musculus GN=Hyou1 PE=1 SV=1	1	32	38.9	111.18	999	0	277.48	60648000	4430200	11103000	13273000	10092000	11730000	0.817719	2.64882	1.8311	4631
F7A1F0		Tsga10ip	tr|F7A1F0|F7A1F0_MOUSE Protein Tsga10ip OS=Mus musculus GN=Tsga10ip PE=4 SV=1	1	2	15.3	17.894	157	0.0099461	1.8839	1046000	162390	0	79455	373940	189440	0.810905	-3.38142	-4.19232	379
Q7TMY8	E3 ubiquitin-protein ligase HUWE1	Huwe1	sp|Q7TMY8|HUWE1_MOUSE E3 ubiquitin-protein ligase HUWE1 OS=Mus musculus GN=Huwe1 PE=1 SV=5	1	61	17.6	482.63	4377	0	168.96	9161800	1120900	916110	1725500	1672800	1618100	0.810682	-0.149214	-0.959896	2447
Q8BL95	UPF0769 protein C21orf59 homolog		sp|Q8BL95|CU059_MOUSE UPF0769 protein C21orf59 homolog OS=Mus musculus PE=1 SV=1	1	6	23.8	33.19	290	0	14.989	14365000	2533600	1259900	2070500	5173100	2352100	0.803017	0.661245	-0.141772	2747
Q9CQT1	Methylthioribose-1-phosphate isomerase	Mri1	sp|Q9CQT1|MTNA_MOUSE Methylthioribose-1-phosphate isomerase OS=Mus musculus GN=Mri1 PE=1 SV=1	1	5	13.8	39.41	369	0.00028153	6.2815	3555300	595470	278800	574680	863960	601500	0.802746	-1.47157	-2.27432	3926
P51174	Long-chain specific acyl-CoA dehydrogenase, mitochondrial	Acadl	sp|P51174|ACADL_MOUSE Long-chain specific acyl-CoA dehydrogenase, mitochondrial OS=Mus musculus GN=Acadl PE=1 SV=2	1	11	25.3	47.907	430	0	88.848	28787000	4638400	1974900	3496200	5760100	6043800	0.800023	1.41871	0.618682	1121
Q9Z1Q2	Abhydrolase domain-containing protein 16A	Abhd16a	sp|Q9Z1Q2|ABHGA_MOUSE Protein ABHD16A OS=Mus musculus GN=Abhd16a PE=1 SV=3	1	3	5.9	63.085	558	0.002516	2.8347	586570	59909	116410	126820	138340	145100	0.797933	-3.76299	-4.56092	4906
P19096	Fatty acid synthase;[Acyl-carrier-protein] S-acetyltransferase;[Acyl-carrier-protein] S-malonyltransferase;3-oxoacyl-[acyl-carrier-protein] synthase;3-oxoacyl-[acyl-carrier-protein] reductase;3-hydroxyacyl-[acyl-carrier-protein] dehydratase;Enoyl-[acyl-carrier-protein] reductase;Oleoyl-[acyl-carrier-protein] hydrolase	Fasn	sp|P19096|FAS_MOUSE Fatty acid synthase OS=Mus musculus GN=Fasn PE=1 SV=2	1	51	23.8	272.43	2504	0	164.3	15095000	1287700	2171600	2745100	2929000	2538100	0.797174	0.559932	-0.237243	866
E9Q1U1	Coiled-coil domain-containing protein 171	Ccdc171	sp|E9Q1U1|CC171_MOUSE Coiled-coil domain-containing protein 171 OS=Mus musculus GN=Ccdc171 PE=2 SV=1	1	17	14.4	152.31	1324	0	32.917	11117000	1573400	1375600	2624300	3055400	1730500	0.796467	0.37442	-0.422047	312
Q03141	MAP/microtubule affinity-regulating kinase 3	Mark3	sp|Q03141|MARK3_MOUSE MAP/microtubule affinity-regulating kinase 3 OS=Mus musculus GN=Mark3 PE=1 SV=2	1	6	9.6	84.389	753	0	17.707	1012500	272560	57559	178240	301730	158800	0.7952	-3.18091	-3.97611	1528
Q80VJ3	2-deoxynucleoside 5-phosphate N-hydrolase 1	Dnph1	sp|Q80VJ3|DNPH1_MOUSE 2-deoxynucleoside 5-phosphate N-hydrolase 1 OS=Mus musculus GN=Dnph1 PE=1 SV=2	1	2	16.2	18.977	173	0	25.504	22808000	847750	6301000	3086700	5638300	3078200	0.794439	1.02406	0.229625	2541
Q8K4K1	Centrin-4	Cetn4	sp|Q8K4K1|CETN4_MOUSE Centrin-4 OS=Mus musculus GN=Cetn4 PE=1 SV=1	1	4	28	19.2	168	0	24.905	29747000	1280000	8238500	4832100	8827300	3479000	0.793784	1.51403	0.720242	3255
Q9D168	Integrator complex subunit 12	Ints12	sp|Q9D168|INT12_MOUSE Integrator complex subunit 12 OS=Mus musculus GN=Ints12 PE=1 SV=1	1	10	33.2	48.568	461	0	19.387	10879000	753700	2588600	2405000	3382100	1451500	0.793662	0.296759	-0.496903	4125
P46414	Cyclin-dependent kinase inhibitor 1B	Cdkn1b	sp|P46414|CDN1B_MOUSE Cyclin-dependent kinase inhibitor 1B OS=Mus musculus GN=Cdkn1b PE=1 SV=2	1	2	10.7	22.193	197	0	7.171	2125600	285830	238760	361730	643490	329430	0.790189	-2.1254	-2.91559	1047
Q8VCE4	Uncharacterized protein C9orf40 homolog		sp|Q8VCE4|CI040_MOUSE Uncharacterized protein C9orf40 homolog OS=Mus musculus PE=1 SV=1	1	2	17.2	17.985	163	0.00026281	4.9521	4272700	532300	368650	544270	1145500	598530	0.789252	-1.36445	-2.1537	3393
Q9JJ78	Lymphokine-activated killer T-cell-originated protein kinase	Pbk	sp|Q9JJ78|TOPK_MOUSE Lymphokine-activated killer T-cell-originated protein kinase OS=Mus musculus GN=Pbk PE=1 SV=1	1	7	23.3	36.744	330	0	41.695	26866000	2473900	3965800	4851500	6440200	4196500	0.786321	1.4545	0.668179	4597
Q9CR51	V-type proton ATPase subunit G 1	Atp6v1g1	sp|Q9CR51|VATG1_MOUSE V-type proton ATPase subunit G 1 OS=Mus musculus GN=Atp6v1g1 PE=1 SV=3	1	2	23.7	13.724	118	0	18.211	25109000	2421600	3469400	3710000	7546100	3697400	0.78451	1.34081	0.556303	3956
Q9CQK7	RWD domain-containing protein 1	Rwdd1	sp|Q9CQK7|RWDD1_MOUSE RWD domain-containing protein 1 OS=Mus musculus GN=Rwdd1 PE=1 SV=1	1	1	3.7	27.785	243	0.0087958	1.9643	3118900	160560	716260	636890	711430	363130	0.780899	-1.75825	-2.53915	3914
Q8BFU3	RING finger protein 214	Rnf214	sp|Q8BFU3|RN214_MOUSE RING finger protein 214 OS=Mus musculus GN=Rnf214 PE=1 SV=1	1	7	14.2	73.624	668	0	24.881	1263100	284890	88308	246890	216560	314510	0.780351	-2.85509	-3.63544	2635
E9PXT9		Fam170b	sp|E9PXT9|F170B_MOUSE Protein FAM170B OS=Mus musculus GN=Fam170b PE=1 SV=1	1	4	17.5	43.766	378	0	9.9072	7274900	559300	1477000	1530800	1763500	1166300	0.777986	-0.338852	-1.11684	286
Q9JI08	Bridging integrator 3	Bin3	sp|Q9JI08|BIN3_MOUSE Bridging integrator 3 OS=Mus musculus GN=Bin3 PE=1 SV=1	1	3	15	29.65	253	0.00050723	4.3995	3110700	349900	427380	474400	1167300	437810	0.777885	-1.57183	-2.34972	4573
Q8BHN3	Neutral alpha-glucosidase AB	Ganab	sp|Q8BHN3|GANAB_MOUSE Neutral alpha-glucosidase AB OS=Mus musculus GN=Ganab PE=1 SV=1	1	23	29.1	106.91	944	0	92.224	19893000	1758400	3071000	3995500	3389600	3876300	0.776851	1.01432	0.237466	2699
Q8VBT9	Tether containing UBX domain for GLUT4	Aspscr1	sp|Q8VBT9|ASPC1_MOUSE Tether containing UBX domain for GLUT4 OS=Mus musculus GN=Aspscr1 PE=1 SV=1	1	12	24.4	59.795	550	0	26.175	15563000	1778600	1858700	2479900	4216000	2393200	0.774461	0.657959	-0.116503	3369
Q60692	Proteasome subunit beta type-6	Psmb6	sp|Q60692|PSB6_MOUSE Proteasome subunit beta type-6 OS=Mus musculus GN=Psmb6 PE=1 SV=3	1	7	26.9	25.378	238	0	33.456	121730000	6033600	27757000	18847000	29525000	16186000	0.773648	3.48853	2.71488	1952
Q62093	Serine/arginine-rich splicing factor 2	Srsf2	sp|Q62093|SRSF2_MOUSE Serine/arginine-rich splicing factor 2 OS=Mus musculus GN=Srsf2 PE=1 SV=4	1	5	26.7	25.476	221	0	99.756	379100000	10396000	126210000	51783000	80769000	47125000	0.772646	4.97244	4.1998	2075
Q64520	Guanylate kinase	Guk1	sp|Q64520|KGUA_MOUSE Guanylate kinase OS=Mus musculus GN=Guk1 PE=1 SV=2	1	3	19.2	21.918	198	0.00051164	4.5163	17440000	1501500	2594100	2169600	5730900	2561400	0.772169	0.773967	0.00179863	2153
Q9CQ65	S-methyl-5-thioadenosine phosphorylase	Mtap	sp|Q9CQ65|MTAP_MOUSE S-methyl-5-thioadenosine phosphorylase OS=Mus musculus GN=Mtap PE=1 SV=1	1	6	25.1	31.062	283	0	14.706	13632000	802690	2769100	2573600	2634500	2021600	0.771386	0.368531	-0.402855	3878
Q9QYI5	DnaJ homolog subfamily B member 2	Dnajb2	sp|Q9QYI5|DNJB2_MOUSE DnaJ homolog subfamily B member 2 OS=Mus musculus GN=Dnajb2 PE=1 SV=2	1	8	33.2	30.614	277	0	11.646	14305000	1006300	2915500	2299400	3268300	2742600	0.767325	0.564706	-0.202619	4716
O35047	Homologous-pairing protein 2 homolog	Psmc3ip	sp|O35047|HOP2_MOUSE Homologous-pairing protein 2 homolog OS=Mus musculus GN=Psmc3ip PE=1 SV=1	1	2	15.2	24.748	217	0	7.9774	3542100	173120	954030	487930	928330	606610	0.766404	-1.51164	-2.27805	484
Q3UFF7	Lysophospholipase-like protein 1	Lyplal1	sp|Q3UFF7|LYPL1_MOUSE Lysophospholipase-like protein 1 OS=Mus musculus GN=Lyplal1 PE=1 SV=3	1	4	21.3	26.354	239	0	9.7234	2846200	172880	482670	613600	748990	214660	0.766308	-2.00424	-2.77054	1717
F8VPX2		Fbxw9	tr|F8VPX2|F8VPX2_MOUSE Protein Fbxw9 OS=Mus musculus GN=Fbxw9 PE=1 SV=1	1	6	15.7	50.533	458	0	9.884	5240500	461840	694380	882720	1091200	770410	0.76553	-1.03386	-1.79939	388
Q07113	Cation-independent mannose-6-phosphate receptor	Igf2r	sp|Q07113|MPRI_MOUSE Cation-independent mannose-6-phosphate receptor OS=Mus musculus GN=Igf2r PE=1 SV=1	1	6	2.5	273.81	2483	0.00026462	5.0901	640220	73763	82342	260400	141870	52335	0.765327	-3.89529	-4.66061	1557
Q8VDR9	Dedicator of cytokinesis protein 6	Dock6	sp|Q8VDR9|DOCK6_MOUSE Dedicator of cytokinesis protein 6 OS=Mus musculus GN=Dock6 PE=1 SV=4	1	21	11.1	233.26	2080	0	23.92	3338100	497750	386490	493840	547890	1272400	0.764824	-1.4032	-2.16802	3432
O88325		Naglu	tr|O88325|O88325_MOUSE Alpha-N-acetylglucosaminidase OS=Mus musculus GN=Naglu PE=1 SV=1	1	7	9.9	82.595	739	0.00027785	5.9737	2592700	510680	156520	339650	603770	447710	0.762768	-2.0388	-2.80157	629
O08788	Dynactin subunit 1	Dctn1	sp|O08788|DCTN1_MOUSE Dynactin subunit 1 OS=Mus musculus GN=Dctn1 PE=1 SV=3	1	44	41.1	141.67	1281	0	323.31	56923000	7852600	6163400	9864100	10563000	13053000	0.759979	2.57941	1.81943	456
Q99PP2	Zinc finger protein 318	Znf318	sp|Q99PP2|ZN318_MOUSE Zinc finger protein 318 (Fragment) OS=Mus musculus GN=Znf318 PE=1 SV=2	1	53	34.8	228.22	2064	0	323.31	24420000	2176300	3086300	4331900	4192200	3861100	0.758641	1.1535	0.394857	3826
Q60737	Casein kinase II subunit alpha	Csnk2a1	sp|Q60737|CSK21_MOUSE Casein kinase II subunit alpha OS=Mus musculus GN=Csnk2a1 PE=1 SV=2	1	13	36.3	45.133	391	0	43.442	32279000	1220900	9119400	5133400	5836100	4992600	0.758408	1.51783	0.759421	1957
Q80YA7	Dipeptidyl peptidase 8	Dpp8	sp|Q80YA7|DPP8_MOUSE Dipeptidyl peptidase 8 OS=Mus musculus GN=Dpp8 PE=1 SV=1	1	3	5.2	102.18	892	0.0039062	2.3054	642230	0	179600	125600	178340	50452	0.758275	-4.15352	-4.91179	2594
Q9CY94	DNA replication complex GINS protein PSF3	Gins3	sp|Q9CY94|PSF3_MOUSE DNA replication complex GINS protein PSF3 OS=Mus musculus GN=Gins3 PE=2 SV=1	1	3	18.1	24.576	216	0.0039241	2.3675	4186500	679110	358780	888610	904320	600470	0.756733	-1.24084	-1.99758	4049
Q9CVB6	Actin-related protein 2/3 complex subunit 2	Arpc2	sp|Q9CVB6|ARPC2_MOUSE Actin-related protein 2/3 complex subunit 2 OS=Mus musculus GN=Arpc2 PE=1 SV=3	1	12	35	34.357	300	0	48.319	31013000	1484600	7193300	4922200	7697800	3694700	0.756651	1.48599	0.729343	3983
Q8VDC1	FYVE and coiled-coil domain-containing protein 1	Fyco1	sp|Q8VDC1|FYCO1_MOUSE FYVE and coiled-coil domain-containing protein 1 OS=Mus musculus GN=Fyco1 PE=1 SV=1	1	22	18.2	162.33	1437	0	63.218	10363000	1138500	1331900	2255400	2167400	1526300	0.754766	0.0760552	-0.678711	3412
P07901;REV__Q8BL66	Heat shock protein HSP 90-alpha	Hsp90aa1	sp|P07901|HS90A_MOUSE Heat shock protein HSP 90-alpha OS=Mus musculus GN=Hsp90aa1 PE=1 SV=4	2	50	50.2	84.787	733	0	323.31	2813000000	235790000	426290000	539320000	586510000	400860000	0.752744	8.08225	7.3295	746
P27612	Phospholipase A-2-activating protein	Plaa	sp|P27612|PLAP_MOUSE Phospholipase A-2-activating protein OS=Mus musculus GN=Plaa PE=1 SV=4	1	27	38.3	87.22	794	0	117.23	26553000	2074300	4290900	4407700	6119100	3908800	0.751684	1.34962	0.597932	930
Q9CPR8	Melanoma-associated antigen G1	Ndnl2	sp|Q9CPR8|NSE3_MOUSE Non-structural maintenance of chromosomes element 3 homolog OS=Mus musculus GN=Nsmce3 PE=1 SV=1	1	9	35.5	31.46	279	0	24.075	8670000	1225500	1035700	1439400	2729100	1444200	0.751347	-0.055686	-0.807033	3843
P50518	V-type proton ATPase subunit E 1	Atp6v1e1	sp|P50518|VATE1_MOUSE V-type proton ATPase subunit E 1 OS=Mus musculus GN=Atp6v1e1 PE=1 SV=2	1	5	23.9	26.157	226	0	6.5644	2723600	298710	300950	297250	907200	395890	0.750544	-1.96627	-2.71681	1114
Q9D9J7	Izumo sperm-egg fusion protein 1	Izumo1	sp|Q9D9J7|IZUM1_MOUSE Izumo sperm-egg fusion protein 1 OS=Mus musculus GN=Izumo1 PE=1 SV=1	1	3	7.3	44.885	397	0.00094451	3.2573	1828500	316160	174170	379310	295060	455970	0.749146	-2.32123	-3.07037	4331
Q99K23	Ufm1-specific protease 2	Ufsp2	sp|Q99K23|UFSP2_MOUSE Ufm1-specific protease 2 OS=Mus musculus GN=Ufsp2 PE=1 SV=1	1	6	15.6	52.515	461	0	15.48	3448000	572930	412740	897770	665630	757820	0.747791	-1.27136	-2.01915	3725
P49891	Estrogen sulfotransferase, testis isoform	Sult1e1	sp|P49891|ST1E1_MOUSE Estrogen sulfotransferase, testis isoform OS=Mus musculus GN=Sult1e1 PE=1 SV=2	1	4	13.6	35.59	295	0.00050365	4.305	9186000	1911500	837960	2106800	2395900	1581200	0.747665	0.108473	-0.639192	1106
Q80XJ3	Tetratricopeptide repeat protein 28	Ttc28	sp|Q80XJ3|TTC28_MOUSE Tetratricopeptide repeat protein 28 OS=Mus musculus GN=Ttc28 PE=1 SV=3	1	5	2.6	267.46	2450	0.0002702	5.4945	275250	45151	27149	42701	62888	62905	0.747528	-5.06752	-5.81505	2577
B1AUN2		Eif2b3	tr|B1AUN2|B1AUN2_MOUSE MCG14442 OS=Mus musculus GN=Eif2b3 PE=1 SV=1	1	5	11.5	50.488	452	0	6.5606	3150600	578570	239660	590860	495150	694420	0.747369	-1.65684	-2.40421	146
Q80VJ2	Steroid receptor RNA activator 1	Sra1	sp|Q80VJ2|SRA1_MOUSE Steroid receptor RNA activator 1 OS=Mus musculus GN=Sra1 PE=1 SV=3	1	2	12.1	25.557	232	0	13.209	3500600	573800	311980	569570	566920	919760	0.745704	-1.47424	-2.21995	2540
A6ZI47	Fructose-bisphosphate aldolase	Aldoart2	tr|A6ZI47|A6ZI47_MOUSE Fructose-bisphosphate aldolase OS=Mus musculus GN=Aldoart2 PE=1 SV=1	1	12	28.8	39.37	364	0	13.728	24033000	3120100	2900400	4207200	5595500	4533100	0.745566	1.35547	0.609901	137
P59235	Nucleoporin Nup43	Nup43	sp|P59235|NUP43_MOUSE Nucleoporin Nup43 OS=Mus musculus GN=Nup43 PE=1 SV=2	1	2	8.2	41.989	380	0	8.4436	4084500	332590	800290	774510	923000	749470	0.743307	-1.19051	-1.93382	1212
Q9Z2D8	Methyl-CpG-binding domain protein 3	Mbd3	sp|Q9Z2D8|MBD3_MOUSE Methyl-CpG-binding domain protein 3 OS=Mus musculus GN=Mbd3 PE=1 SV=1	1	3	11.2	32.168	285	0.00050314	4.2796	4466300	852960	437890	1050700	1315200	640930	0.740642	-0.948784	-1.68943	4929
O70456	14-3-3 protein sigma	Sfn	sp|O70456|1433S_MOUSE 14-3-3 protein sigma OS=Mus musculus GN=Sfn PE=1 SV=2	1	5	18.5	27.706	248	0.00095012	3.3395	67870000	10545000	5416300	9826200	17967000	9478900	0.74026	2.67914	1.93888	614
Q9JIX0	Transcription and mRNA export factor ENY2	Eny2	sp|Q9JIX0|ENY2_MOUSE Transcription and mRNA export factor ENY2 OS=Mus musculus GN=Eny2 PE=1 SV=1	1	2	25.7	11.528	101	0.0055473	2.1558	15174000	2115400	1388800	2545100	4021900	1905400	0.739793	0.538157	-0.201636	4591
Q99LX0	Protein deglycase DJ-1	Park7	sp|Q99LX0|PARK7_MOUSE Protein deglycase DJ-1 OS=Mus musculus GN=Park7 PE=1 SV=1	1	10	62.4	20.021	189	0	209.83	442400000	28857000	90013000	75140000	104670000	65018000	0.738486	5.43092	4.69243	3781
Q9DAZ9	Abscission/NoCut checkpoint regulator	Zfyve19	sp|Q9DAZ9|ANCHR_MOUSE Abscission/NoCut checkpoint regulator OS=Mus musculus GN=Zfyve19 PE=1 SV=2	1	5	19.8	43.272	389	0	14.322	5561000	632520	857060	1334200	1677300	686660	0.736883	-0.683813	-1.4207	4396
O70435	Proteasome subunit alpha type-3	Psma3	sp|O70435|PSA3_MOUSE Proteasome subunit alpha type-3 OS=Mus musculus GN=Psma3 PE=1 SV=3	1	7	26.7	28.405	255	0	48.725	124140000	6505500	30316000	22008000	28408000	17043000	0.736543	3.56936	2.83281	612
Q3THS6;Q91X83	S-adenosylmethionine synthase isoform type-2	Mat2a	sp|Q3THS6|METK2_MOUSE S-adenosylmethionine synthase isoform type-2 OS=Mus musculus GN=Mat2a PE=1 SV=2	2	7	20.5	43.688	395	0	19.987	25075000	1933300	4594000	5053700	5144100	3909300	0.735596	1.33198	0.596387	1636
Q8K400	Syntaxin-binding protein 5	Stxbp5	sp|Q8K400|STXB5_MOUSE Syntaxin-binding protein 5 OS=Mus musculus GN=Stxbp5 PE=1 SV=3	1	2	2.3	127.65	1152	0.0055366	2.1406	299320	43150	0	72439	104440	52686	0.734989	-4.65467	-5.38966	3246
P54731	FAS-associated factor 1	Faf1	sp|P54731|FAF1_MOUSE FAS-associated factor 1 OS=Mus musculus GN=Faf1 PE=1 SV=2	1	10	14.5	73.862	649	0	11.443	6335500	865290	655800	1535200	1694500	625820	0.73169	-0.656039	-1.38773	1163
P52480;P53657	Pyruvate kinase PKM	Pkm	sp|P52480|KPYM_MOUSE Pyruvate kinase PKM OS=Mus musculus GN=Pkm PE=1 SV=4	2	27	58.4	57.844	531	0	323.31	221590000	22387000	28990000	43515000	47540000	30430000	0.731555	4.42357	3.69202	1139
Q921D4	Mediator of RNA polymerase II transcription subunit 6	Med6	sp|Q921D4|MED6_MOUSE Mediator of RNA polymerase II transcription subunit 6 OS=Mus musculus GN=Med6 PE=1 SV=2	1	6	21.1	28.433	246	0	8.2371	16358000	2660300	1770000	2155600	4539000	3968800	0.730666	0.869315	0.138648	3623
Q9ERV1	Probable E3 ubiquitin-protein ligase makorin-2	Mkrn2	sp|Q9ERV1|MKRN2_MOUSE Probable E3 ubiquitin-protein ligase makorin-2 OS=Mus musculus GN=Mkrn2 PE=1 SV=2	1	2	4.8	46.596	416	0.00073457	3.8511	769770	0	167500	248340	223500	130440	0.730305	-3.26034	-3.99065	4533
A0A0U1RNF2			tr|A0A0U1RNF2|A0A0U1RNF2_MOUSE Protein Lcmt1 OS=Mus musculus GN=Lcmt1 PE=1 SV=1	1	5	14.5	38.161	332	0.00027285	5.6252	8183500	1366400	883150	1666700	2039300	1478000	0.729297	-0.114169	-0.843466	44
Q400C8	Archaemetzincin-2	Amz2	sp|Q400C8|AMZ2_MOUSE Archaemetzincin-2 OS=Mus musculus GN=Amz2 PE=2 SV=1	1	3	9.5	41.341	359	0	7.8094	3418600	589590	270390	615090	646140	605970	0.728534	-1.57504	-2.30357	1826
Q8BHR8	UPF0705 protein C11orf49 homolog		sp|Q8BHR8|CK049_MOUSE UPF0705 protein C11orf49 homolog OS=Mus musculus PE=1 SV=1	1	3	10.3	37.549	331	0.00071548	3.3921	3204000	407220	461650	532850	693940	833230	0.728061	-1.45658	-2.18464	2701
Q9ER69	Pre-mRNA-splicing regulator WTAP	Wtap	sp|Q9ER69|FL2D_MOUSE Pre-mRNA-splicing regulator WTAP OS=Mus musculus GN=Wtap PE=1 SV=3	1	6	18.7	44.176	396	0	13.678	3666100	244400	903100	565260	1435500	482830	0.727852	-1.34103	-2.06888	4514
Q3UN02	Lysocardiolipin acyltransferase 1	Lclat1	sp|Q3UN02|LCLT1_MOUSE Lysocardiolipin acyltransferase 1 OS=Mus musculus GN=Lclat1 PE=1 SV=2	1	6	17.6	44.399	376	0	7.8627	5681400	1226200	480080	1421300	1126300	1064400	0.727123	-0.634127	-1.36125	1765
Q62420	Endophilin-A1	Sh3gl2	sp|Q62420|SH3G2_MOUSE Endophilin-A1 OS=Mus musculus GN=Sh3gl2 PE=1 SV=2	1	7	19.9	39.955	352	0	7.8524	1922900	115630	445400	505190	382530	225400	0.721267	-2.39737	-3.11864	2110
Q9DA97	Septin-14	Septin-14	sp|Q9DA97|SEP14_MOUSE Septin-14 OS=Mus musculus GN=Sept14 PE=1 SV=3	1	13	28.8	49.81	430	0	62.946	27025000	3840900	3340400	5897200	6227100	4641700	0.718962	1.58067	0.861712	4361
O55057	Retinal rod rhodopsin-sensitive cGMP 3,5-cyclic phosphodiesterase subunit delta	Pde6d	sp|O55057|PDE6D_MOUSE Retinal rod rhodopsin-sensitive cGMP 3,5-cyclic phosphodiesterase subunit delta OS=Mus musculus GN=Pde6d PE=1 SV=1	1	4	33.3	17.348	150	0	26.62	83790000	4251400	20743000	14207000	20130000	10740000	0.718944	2.97117	2.25222	573
P0CW70;A6X919	Probable C-mannosyltransferase DPY19L2;Probable C-mannosyltransferase DPY19L1	Dpy19l2;Dpy19l1	sp|P0CW70|D19L2_MOUSE Probable C-mannosyltransferase DPY19L2 OS=Mus musculus GN=Dpy19l2 PE=1 SV=1;sp|A6X919|D19L1_MOUSE Probable C-mannosyltransferase DPY19L1 OS=Mus musculus GN=Dpy19l1 PE=1 SV=1	2	2	2.6	89.881	773	0.0045229	2.2372	731320	287270	67578	186360	0	190110	0.718876	-3.10356	-3.82243	774
P62259	14-3-3 protein epsilon	Ywhae	sp|P62259|1433E_MOUSE 14-3-3 protein epsilon OS=Mus musculus GN=Ywhae PE=1 SV=1	1	26	78.4	29.174	255	0	323.31	1616800000	86701000	381780000	260960000	396080000	215630000	0.717909	7.24617	6.52827	1287
Q78PG9	Coiled-coil domain-containing protein 25	Ccdc25	sp|Q78PG9|CCD25_MOUSE Coiled-coil domain-containing protein 25 OS=Mus musculus GN=Ccdc25 PE=1 SV=1	1	2	11.1	24.48	208	0.00094675	3.2883	4123500	156460	1427400	581510	1178700	568410	0.716679	-1.34371	-2.06039	2424
P55302	Alpha-2-macroglobulin receptor-associated protein	Lrpap1	sp|P55302|AMRP_MOUSE Alpha-2-macroglobulin receptor-associated protein OS=Mus musculus GN=Lrpap1 PE=1 SV=1	1	8	22.8	42.215	360	0	14.444	9353200	422490	2189500	1970800	1307100	1269800	0.714735	-0.32049	-1.03522	1173
J3QK56		4930544D05Rik	tr|J3QK56|J3QK56_MOUSE Protein 4930544D05Rik OS=Mus musculus GN=4930544D05Rik PE=4 SV=1	1	2	11.2	22.427	214	0.0075997	2.034	2030900	1256100	0	0	0	774780	0.714052	-3.15797	-3.87202	423
Q9CQ60	6-phosphogluconolactonase	Pgls	sp|Q9CQ60|6PGL_MOUSE 6-phosphogluconolactonase OS=Mus musculus GN=Pgls PE=1 SV=1	1	9	50.2	27.254	257	0	27.03	37997000	1382000	10556000	6122900	8088200	4121600	0.712985	1.66734	0.954354	3877
Q8CHW4	Translation initiation factor eIF-2B subunit epsilon	Eif2b5	sp|Q8CHW4|EI2BE_MOUSE Translation initiation factor eIF-2B subunit epsilon OS=Mus musculus GN=Eif2b5 PE=1 SV=1	1	3	4.3	80.085	717	0.00026504	5.1151	1376100	195780	83149	203320	264790	141120	0.712285	-3.23716	-3.94945	3109
P0C0A3	Charged multivesicular body protein 6	Chmp6	sp|P0C0A3|CHMP6_MOUSE Charged multivesicular body protein 6 OS=Mus musculus GN=Chmp6 PE=1 SV=2	1	2	12.5	23.415	200	0	8.3858	5253100	0	2377100	1603500	1272500	0	0.709869	-1.59392	-2.30379	769
Q9Z329	Inositol 1,4,5-trisphosphate receptor type 2	Itpr2	sp|Q9Z329|ITPR2_MOUSE Inositol 1,4,5-trisphosphate receptor type 2 OS=Mus musculus GN=Itpr2 PE=1 SV=4	1	6	2.3	307.47	2701	0.0031028	2.5435	469200	9180.4	0	432450	19522	2331.5	0.709666	-6.1013	-6.81097	4950
Q3U0P5		Entpd6	tr|Q3U0P5|Q3U0P5_MOUSE Ectonucleoside triphosphate diphosphohydrolase 6, isoform CRA_a OS=Mus musculus GN=Entpd6 PE=1 SV=1	1	2	6.2	49.799	455	0.00050429	4.3199	1608600	136070	353530	422650	248950	364730	0.709572	-2.45829	-3.16786	1676
Q9CXX0	Hydrolethalus syndrome protein 1 homolog	Hyls1	sp|Q9CXX0|HYLS1_MOUSE Hydrolethalus syndrome protein 1 homolog OS=Mus musculus GN=Hyls1 PE=2 SV=2	1	2	7.8	35.141	307	0.0020747	2.9138	1243100	271590	85434	0	556700	148300	0.709405	-2.98439	-3.69379	4035
Q61147	Ceruloplasmin	Cp	sp|Q61147|CERU_MOUSE Ceruloplasmin OS=Mus musculus GN=Cp PE=1 SV=2	1	16	18.5	121.15	1061	0	21.012	6129600	649160	892980	1185400	1214500	1110400	0.707546	-0.664802	-1.37235	2000
P39447	Tight junction protein ZO-1	Tjp1	sp|P39447|ZO1_MOUSE Tight junction protein ZO-1 OS=Mus musculus GN=Tjp1 PE=1 SV=2	1	46	32.9	194.74	1745	0	323.31	31094000	3547400	4567300	5268600	11578000	3862200	0.70628	1.73631	1.03003	1016
P15105	Glutamine synthetase	Glul	sp|P15105|GLNA_MOUSE Glutamine synthetase OS=Mus musculus GN=Glul PE=1 SV=6	1	9	26.8	42.119	373	0	84.83	84266000	3273200	20023000	12856000	16265000	9160100	0.705946	2.74407	2.03812	828
Q91YH5	Atlastin-3	Atl3	sp|Q91YH5|ATLA3_MOUSE Atlastin-3 OS=Mus musculus GN=Atl3 PE=1 SV=1	1	7	12.9	60.574	541	0	38.329	10484000	1754200	1176900	3420400	2123900	1460800	0.70159	0.245472	-0.456118	3579
Q6IMH7		Adam6b	tr|Q6IMH7|Q6IMH7_MOUSE ADAM6b OS=Mus musculus GN=Adam6b PE=4 SV=1	1	9	13.2	85.35	756	0	9.7565	1517700	372120	121230	304320	354940	317090	0.701208	-2.51298	-3.21419	2218
Q8QZS3	Folliculin	Flcn	sp|Q8QZS3|FLCN_MOUSE Folliculin OS=Mus musculus GN=Flcn PE=1 SV=1	1	2	5.2	64.327	579	0.0031056	2.549	493520	119950	37161	85242	126460	98506	0.700333	-4.18347	-4.8838	3266
Q8R0Y6	Cytosolic 10-formyltetrahydrofolate dehydrogenase	Aldh1l1	sp|Q8R0Y6|AL1L1_MOUSE Cytosolic 10-formyltetrahydrofolate dehydrogenase OS=Mus musculus GN=Aldh1l1 PE=1 SV=1	1	19	25.3	98.708	902	0	46.194	9380700	419640	1877500	1759100	1384700	1021300	0.698867	-0.452135	-1.151	3287
Q6GYP7	Ral GTPase-activating protein subunit alpha-1	Ralgapa1	sp|Q6GYP7|RGPA1_MOUSE Ral GTPase-activating protein subunit alpha-1 OS=Mus musculus GN=Ralgapa1 PE=1 SV=1	1	14	8.6	229.39	2035	0	17.017	6068500	1428800	383860	799340	1440900	1253500	0.698489	-0.713803	-1.41229	2215
O08997	Copper transport protein ATOX1	Atox1	sp|O08997|ATOX1_MOUSE Copper transport protein ATOX1 OS=Mus musculus GN=Atox1 PE=1 SV=1	1	2	32.4	7.3384	68	0.00027152	5.5762	56291000	4049600	13609000	6971600	20153000	10331000	0.697586	2.6107	1.91311	466
A0A0G2JE99;P01843	Ig lambda-1 chain C region		tr|A0A0G2JE99|A0A0G2JE99_MOUSE Protein Iglc1 (Fragment) OS=Mus musculus GN=Iglc1 PE=4 SV=1;sp|P01843|LAC1_MOUSE Ig lambda-1 chain C region OS=Mus musculus PE=1 SV=1	2	3	43.4	11.575	106	0	118.4	57238000	10894000	2923900	1888200	25998000	12989000	0.697454	2.21511	1.51766	36
P11859	Angiotensinogen;Angiotensin-1;Angiotensin-2;Angiotensin-3;Angiotensin-4;Angiotensin 1-9;Angiotensin 1-7;Angiotensin 1-5;Angiotensin 1-4	Agt	sp|P11859|ANGT_MOUSE Angiotensinogen OS=Mus musculus GN=Agt PE=1 SV=1	1	1	2.9	51.99	477	0.0031362	2.639	795270	0	148580	180930	141820	140450	0.696305	-3.59582	-4.29212	800
Q91VI7	Ribonuclease inhibitor	Rnh1	sp|Q91VI7|RINI_MOUSE Ribonuclease inhibitor OS=Mus musculus GN=Rnh1 PE=1 SV=1	1	6	16.9	49.816	456	0	19.932	16447000	1390800	2511800	3534500	2497900	2607500	0.694591	0.617889	-0.0767021	3500
Q61316	Heat shock 70 kDa protein 4	Hspa4	sp|Q61316|HSP74_MOUSE Heat shock 70 kDa protein 4 OS=Mus musculus GN=Hspa4 PE=1 SV=1	1	37	56.2	94.132	841	0	323.31	101630000	6594800	19680000	17203000	19979000	15160000	0.694353	3.22533	2.53097	2022
P68510	14-3-3 protein eta	Ywhah	sp|P68510|1433F_MOUSE 14-3-3 protein eta OS=Mus musculus GN=Ywhah PE=1 SV=2	1	12	40.7	28.211	246	0	79.085	65256000	4118300	12766000	9646500	18499000	7522700	0.694016	2.57314	1.87912	1382
P58283	E3 ubiquitin-protein ligase RNF216	Rnf216	sp|P58283|RN216_MOUSE E3 ubiquitin-protein ligase RNF216 OS=Mus musculus GN=Rnf216 PE=1 SV=3	1	7	9.7	97.681	853	0	13.973	2439700	414800	223260	438610	559620	403260	0.692741	-2.00264	-2.69538	1202
Q9CY97	RNA polymerase II subunit A C-terminal domain phosphatase SSU72	Ssu72	sp|Q9CY97|SSU72_MOUSE RNA polymerase II subunit A C-terminal domain phosphatase SSU72 OS=Mus musculus GN=Ssu72 PE=1 SV=1	1	1	6.2	22.517	194	0.00094854	3.3194	983290	0	366790	133490	181410	184950	0.689265	-3.49129	-4.18056	4050
Q9DB96	Neuroguidin	Ngdn	sp|Q9DB96|NGDN_MOUSE Neuroguidin OS=Mus musculus GN=Ngdn PE=1 SV=1	1	3	12.4	35.658	315	0.00093985	3.1901	1676600	94915	456760	339300	580280	159550	0.688314	-2.55456	-3.24288	4414
Q8JZV9	3-hydroxybutyrate dehydrogenase type 2	Bdh2	sp|Q8JZV9|BDH2_MOUSE 3-hydroxybutyrate dehydrogenase type 2 OS=Mus musculus GN=Bdh2 PE=1 SV=1	1	1	4.9	26.753	245	0.00094607	3.2764	319050	0	0	57477	95276	76817	0.687793	-4.62876	-5.31655	3149
Q924C1	Exportin-5	Xpo5	sp|Q924C1|XPO5_MOUSE Exportin-5 OS=Mus musculus GN=Xpo5 PE=1 SV=1	1	29	27.5	136.97	1204	0	239.39	41133000	5154600	4798300	7931100	6577500	8174500	0.686486	2.02166	1.33517	3679
Q8VDY4	EF-hand calcium-binding domain-containing protein 7	Efcab7	sp|Q8VDY4|EFCB7_MOUSE EF-hand calcium-binding domain-containing protein 7 OS=Mus musculus GN=Efcab7 PE=2 SV=1	1	3	6.4	71.442	628	0.00027847	6.0226	841290	97940	108000	142050	211070	125570	0.68565	-3.5748	-4.26045	3439
Q99104;E9Q1F5	Unconventional myosin-Va	Myo5a	sp|Q99104|MYO5A_MOUSE Unconventional myosin-Va OS=Mus musculus GN=Myo5a PE=1 SV=2	2	6	3.6	215.54	1853	0	6.6409	12451000	1215400	1181000	621720	4106600	2329200	0.685265	-0.0330356	-0.718301	3696
Q9QY93	dCTP pyrophosphatase 1	Dctpp1	sp|Q9QY93|DCTP1_MOUSE dCTP pyrophosphatase 1 OS=Mus musculus GN=Dctpp1 PE=1 SV=1	1	4	28.8	18.795	170	0.00026399	5.0488	8090900	427550	1884400	1033900	2085600	1158800	0.684874	-0.450011	-1.13488	4706
Q99P25	Translin-associated factor X-interacting protein 1	Tsnaxip1	sp|Q99P25|TXIP1_MOUSE Translin-associated factor X-interacting protein 1 OS=Mus musculus GN=Tsnaxip1 PE=1 SV=2	1	11	16.1	81.761	704	0	14.55	4326900	903020	316150	612800	1273600	674850	0.684538	-1.19873	-1.88326	3815
E9Q152		Als2cr11	tr|E9Q152|E9Q152_MOUSE Protein Als2cr11 OS=Mus musculus GN=Als2cr11 PE=4 SV=1	1	4	8.4	63.178	557	0.00026274	4.9437	1420900	160840	244820	292720	405160	227360	0.68427	-2.62801	-3.31227	309
Q8R361	Rab11 family-interacting protein 5	Rab11fip5	sp|Q8R361|RFIP5_MOUSE Rab11 family-interacting protein 5 OS=Mus musculus GN=Rab11fip5 PE=1 SV=2	1	5	9.8	69.552	645	0	7.0424	738380	16252	283030	122950	106810	81861	0.68358	-4.17755	-4.86113	3329
P63101	14-3-3 protein zeta/delta	Ywhaz	sp|P63101|1433Z_MOUSE 14-3-3 protein zeta/delta OS=Mus musculus GN=Ywhaz PE=1 SV=1	1	17	60.8	27.771	245	0	323.31	1324600000	70110000	315650000	205040000	338010000	163320000	0.682496	6.92034	6.23784	1359
Q7TQK5	Coiled-coil domain-containing protein 93	Ccdc93	sp|Q7TQK5|CCD93_MOUSE Coiled-coil domain-containing protein 93 OS=Mus musculus GN=Ccdc93 PE=1 SV=1	1	3	4.8	72.602	629	0.0091743	1.9358	4911100	1602500	236140	1067400	770550	971760	0.681838	-0.998164	-1.68	2473
Q6PHZ2;P11798	Calcium/calmodulin-dependent protein kinase type II subunit delta	Camk2d	sp|Q6PHZ2|KCC2D_MOUSE Calcium/calmodulin-dependent protein kinase type II subunit delta OS=Mus musculus GN=Camk2d PE=1 SV=1	2	10	20.8	56.369	499	0	41.78	15540000	1615000	2600500	2373900	5087500	2445600	0.681587	0.737728	0.0561409	2348
F6SF53		Lrrc29	tr|F6SF53|F6SF53_MOUSE Protein Lrrc29 OS=Mus musculus GN=Lrrc29 PE=1 SV=1	1	2	10.8	18.086	166	0.0025149	2.8287	3945400	1439600	160980	691410	768910	719970	0.681471	-1.35224	-2.03371	371
A2BIN1;P11589	Major urinary protein 2	Mup10;Mup2	tr|A2BIN1|A2BIN1_MOUSE Major urinary protein 8 OS=Mus musculus GN=Mup10 PE=2 SV=1;sp|P11589|MUP2_MOUSE Major urinary protein 2 OS=Mus musculus GN=Mup2 PE=1 SV=1	2	6	41.1	20.681	180	0	32.271	16384000	0	3684100	3719300	374180	222110	0.680468	-1.45501	-2.13548	105
Q9DB34	Charged multivesicular body protein 2a	Chmp2a	sp|Q9DB34|CHM2A_MOUSE Charged multivesicular body protein 2a OS=Mus musculus GN=Chmp2a PE=1 SV=1	1	9	30.2	25.134	222	0	44.188	199200000	17584000	42025000	38485000	53115000	33608000	0.679931	4.46559	3.78566	4405
Q3TCX3	UPF0469 protein KIAA0907	Kiaa0907	sp|Q3TCX3|K0907_MOUSE UPF0469 protein KIAA0907 OS=Mus musculus GN=Kiaa0907 PE=1 SV=1	1	3	8.3	64.562	612	0	34.107	1722300	487610	100370	460260	271300	296180	0.679356	-2.47606	-3.15542	1626
Q64674	Spermidine synthase	Srm	sp|Q64674|SPEE_MOUSE Spermidine synthase OS=Mus musculus GN=Srm PE=1 SV=1	1	3	11.3	33.995	302	0.00026695	5.27	1302800	0	268540	270140	232900	71309	0.679212	-3.49048	-4.16969	2157
Q9D8Y0	EF-hand domain-containing protein D2	Efhd2	sp|Q9D8Y0|EFHD2_MOUSE EF-hand domain-containing protein D2 OS=Mus musculus GN=Efhd2 PE=1 SV=1	1	12	47.9	26.791	240	0	53.344	92663000	7652800	17345000	16657000	21845000	14348000	0.679085	3.22628	2.5472	4310
Q8BHE1	Gem-associated protein 8	Gemin8	sp|Q8BHE1|GEMI8_MOUSE Gem-associated protein 8 OS=Mus musculus GN=Gemin8 PE=1 SV=1	1	2	10.5	28.396	238	0.0047251	2.2088	1682300	0	861970	228500	368650	223190	0.678833	-2.80143	-3.48026	2693
Q9Z2C4	Myotubularin-related protein 1	Mtmr1	sp|Q9Z2C4|MTMR1_MOUSE Myotubularin-related protein 1 OS=Mus musculus GN=Mtmr1 PE=1 SV=1	1	5	8.2	75.313	669	0.0005	4.1475	2086500	340930	228610	394680	655720	286840	0.678768	-2.141	-2.81977	4925
P20357	Microtubule-associated protein 2	Map2	sp|P20357|MTAP2_MOUSE Microtubule-associated protein 2 OS=Mus musculus GN=Map2 PE=1 SV=2	1	2	1.5	199.13	1828	0.0030756	2.4425	296140	32235	109300	0	71290	59600	0.678555	-4.3749	-5.05345	876
Q8BHW2	Protein OSCP1	Oscp1	sp|Q8BHW2|OSCP1_MOUSE Protein OSCP1 OS=Mus musculus GN=Oscp1 PE=1 SV=1	1	5	15.3	43.231	379	0	15.968	4830700	631850	588940	1102100	1081500	649450	0.678549	-1.01355	-1.6921	2703
F6YCR7		Rhox13	sp|F6YCR7|RHX13_MOUSE Homeobox protein Rhox13 OS=Mus musculus GN=Rhox13 PE=1 SV=2	1	2	10.3	25.316	232	0	7.5339	11115000	843810	2415300	2412300	2540900	1613800	0.677088	0.211663	-0.465425	376
Q4KMM3	Oxidation resistance protein 1	Oxr1	sp|Q4KMM3|OXR1_MOUSE Oxidation resistance protein 1 OS=Mus musculus GN=Oxr1 PE=1 SV=3	1	9	15.1	95.911	866	0	22.506	4042900	391440	692380	770350	1269900	489820	0.676571	-1.2442	-1.92077	1836
Q99J45	Nuclear receptor-binding protein	Nrbp1	sp|Q99J45|NRBP_MOUSE Nuclear receptor-binding protein OS=Mus musculus GN=Nrbp1 PE=1 SV=1	1	2	4.3	59.865	535	0.008794	1.9627	1341800	183430	132340	162500	596440	132430	0.676222	-2.98499	-3.66121	3700
P45481	CREB-binding protein	Crebbp	sp|P45481|CBP_MOUSE CREB-binding protein OS=Mus musculus GN=Crebbp PE=1 SV=3	1	6	3.5	265.49	2441	0	11.032	187120	28464	20455	44827	35455	29863	0.674056	-5.67802	-6.35208	1042
Q9JMH6	Thioredoxin reductase 1, cytoplasmic	Txnrd1	sp|Q9JMH6|TRXR1_MOUSE Thioredoxin reductase 1, cytoplasmic OS=Mus musculus GN=Txnrd1 PE=1 SV=3	1	7	12.6	67.083	613	0	14.524	6803600	688480	874800	1235000	1293200	987440	0.673431	-0.671334	-1.34476	4662
Q9D5R4	Spermatogenesis-associated protein 1	Spata1	sp|Q9D5R4|SPAT1_MOUSE Spermatogenesis-associated protein 1 OS=Mus musculus GN=Spata1 PE=2 SV=1	1	3	8.3	51.077	444	0	10.414	1523600	392140	100650	304300	359320	241880	0.673274	-2.63732	-3.31059	4232
Q9CR89	Endoplasmic reticulum-Golgi intermediate compartment protein 2	Ergic2	sp|Q9CR89|ERGI2_MOUSE Endoplasmic reticulum-Golgi intermediate compartment protein 2 OS=Mus musculus GN=Ergic2 PE=1 SV=1	1	4	14.9	42.481	377	0	8.2374	6871500	1205100	828150	1619100	1469100	1412200	0.672745	-0.307717	-0.980462	3965
Q9WUB3	Glycogen phosphorylase, muscle form	Pygm	sp|Q9WUB3|PYGM_MOUSE Glycogen phosphorylase, muscle form OS=Mus musculus GN=Pygm PE=1 SV=3	1	16	20.9	97.285	842	0	17.212	2564500	221560	256320	308340	605670	244130	0.672693	-2.37543	-3.04813	4822
Q01853	Transitional endoplasmic reticulum ATPase	Vcp	sp|Q01853|TERA_MOUSE Transitional endoplasmic reticulum ATPase OS=Mus musculus GN=Vcp PE=1 SV=4	1	52	62.4	89.321	806	0	323.31	856430000	52865000	173940000	134710000	176360000	124490000	0.670596	6.27492	5.60432	1521
Q3V1G4	Olfactomedin-like protein 2B	Olfml2b	sp|Q3V1G4|OLM2B_MOUSE Olfactomedin-like protein 2B OS=Mus musculus GN=Olfml2b PE=1 SV=2	1	3	5.9	83.502	746	0	10.595	2962300	527870	287410	625040	364990	868290	0.670294	-1.66901	-2.3393	1817
Q8BRH3	Rho GTPase-activating protein 19	Arhgap19	sp|Q8BRH3|RHG19_MOUSE Rho GTPase-activating protein 19 OS=Mus musculus GN=Arhgap19 PE=1 SV=2	1	5	14.2	55.733	494	0	11.473	3728300	569980	417750	658780	1031600	569790	0.667518	-1.34666	-2.01417	2808
Q56A08	G patch domain and KOW motifs-containing protein	Gpkow	sp|Q56A08|GPKOW_MOUSE G patch domain and KOW motifs-containing protein OS=Mus musculus GN=Gpkow PE=1 SV=2	1	7	14.5	53.831	488	0	9.5472	7448500	888990	1289900	1848000	1697500	1302500	0.666751	-0.21352	-0.880271	1858
Q9QZR0	E3 ubiquitin-protein ligase RNF25	Rnf25	sp|Q9QZR0|RNF25_MOUSE E3 ubiquitin-protein ligase RNF25 OS=Mus musculus GN=Rnf25 PE=1 SV=2	1	5	13.2	51.226	456	0.0027088	2.7129	1580000	65865	528430	341550	343710	183300	0.664797	-2.7365	-3.4013	4746
Q9D0M1	Phosphoribosyl pyrophosphate synthase-associated protein 1	Prpsap1	sp|Q9D0M1|KPRA_MOUSE Phosphoribosyl pyrophosphate synthase-associated protein 1 OS=Mus musculus GN=Prpsap1 PE=1 SV=1	1	6	25.6	39.431	356	0	8.5736	7071500	465920	1431500	1155600	1356400	1144400	0.661777	-0.609402	-1.27118	4113
Q6Y685	Transforming acidic coiled-coil-containing protein 1	Tacc1	sp|Q6Y685|TACC1_MOUSE Transforming acidic coiled-coil-containing protein 1 OS=Mus musculus GN=Tacc1 PE=1 SV=1	1	5	6.6	83.951	774	0.00026219	4.9176	1018100	175960	103670	235780	334360	102790	0.661171	-3.20615	-3.86733	2376
Q9D937	Uncharacterized protein C11orf98 homolog		sp|Q9D937|CK098_MOUSE Uncharacterized protein C11orf98 homolog OS=Mus musculus PE=1 SV=1	1	3	30.9	14.098	123	0	73.089	43911000	1880700	12976000	5028800	18465000	4265200	0.660608	1.98611	1.3255	4315
P50295	Arylamine N-acetyltransferase 2	Nat2	sp|P50295|ARY2_MOUSE Arylamine N-acetyltransferase 2 OS=Mus musculus GN=Nat2 PE=1 SV=1	1	1	3.8	33.701	290	0.0055413	2.1485	835490	290870	0	142760	177030	144240	0.660097	-3.59032	-4.25041	1109
P51960	Myb-related protein A	Mybl1	sp|P51960|MYBA_MOUSE Myb-related protein A OS=Mus musculus GN=Mybl1 PE=1 SV=2	1	3	3.9	85.727	751	0.0029253	2.6836	1828700	135150	458390	334720	544360	277600	0.659885	-2.3255	-2.98538	1132
Q9Z2N8;Q99MR0	Actin-like protein 6A	Actl6a	sp|Q9Z2N8|ACL6A_MOUSE Actin-like protein 6A OS=Mus musculus GN=Actl6a PE=1 SV=2	2	10	36.1	47.447	429	0	116.59	45717000	4420800	7111600	7279200	10713000	7410000	0.659554	2.16777	1.50822	4936
Q8CDM1;E9Q166	ATPase family AAA domain-containing protein 2	Atad2	sp|Q8CDM1|ATAD2_MOUSE ATPase family AAA domain-containing protein 2 OS=Mus musculus GN=Atad2 PE=1 SV=1	2	7	7.8	117.94	1040	0.00028321	6.4379	2357700	377120	269570	720030	561770	262260	0.658783	-1.96932	-2.62811	3044
Q8BT07	Centrosomal protein of 55 kDa	Cep55	sp|Q8BT07|CEP55_MOUSE Centrosomal protein of 55 kDa OS=Mus musculus GN=Cep55 PE=1 SV=2	1	15	37	53.93	462	0	53.736	24779000	4771800	2118700	5486100	4921900	3889200	0.657914	1.34775	0.689836	2817
Q91V92	ATP-citrate synthase	Acly	sp|Q91V92|ACLY_MOUSE ATP-citrate synthase OS=Mus musculus GN=Acly PE=1 SV=1	1	24	22.2	119.73	1091	0	33.657	12976000	1863300	1322800	1970400	2706900	2366900	0.657263	0.328969	-0.328294	3495
Q8CJI4	Testis-specific H1 histone	H1fnt	sp|Q8CJI4|H1FNT_MOUSE Testis-specific H1 histone OS=Mus musculus GN=H1fnt PE=2 SV=2	1	4	9	44.399	398	0.00051427	4.6099	5830200	420620	1437700	1213100	736810	1709900	0.655428	-0.686416	-1.34184	3142
P83877	Thioredoxin-like protein 4A	Txnl4a	sp|P83877|TXN4A_MOUSE Thioredoxin-like protein 4A OS=Mus musculus GN=Txnl4a PE=1 SV=1	1	2	16.9	16.786	142	0.00050929	4.4518	2609200	0	1336300	224970	637600	283420	0.650274	-2.43056	-3.08083	1432
P12367;P31324	cAMP-dependent protein kinase type II-alpha regulatory subunit	Prkar2a	sp|P12367|KAP2_MOUSE cAMP-dependent protein kinase type II-alpha regulatory subunit OS=Mus musculus GN=Prkar2a PE=1 SV=2	2	7	24.7	45.389	401	0	24.292	22908000	3402000	3064900	4460800	5579200	4336200	0.648765	1.36086	0.712091	805
Q9DBE8	Alpha-1,3/1,6-mannosyltransferase ALG2	Alg2	sp|Q9DBE8|ALG2_MOUSE Alpha-1,3/1,6-mannosyltransferase ALG2 OS=Mus musculus GN=Alg2 PE=1 SV=2	1	2	5.3	47.404	415	0.0027149	2.7335	1134700	246490	95310	254930	103950	433990	0.64705	-3.03778	-3.68483	4423
Q8BWU5	Probable tRNA N6-adenosine threonylcarbamoyltransferase	Osgep	sp|Q8BWU5|OSGEP_MOUSE Probable tRNA N6-adenosine threonylcarbamoyltransferase OS=Mus musculus GN=Osgep PE=1 SV=2	1	4	14	36.3	335	0.00071582	3.3936	1828200	325520	144970	325440	650580	154210	0.645701	-2.536	-3.1817	2869
Q8R0X7	Sphingosine-1-phosphate lyase 1	Sgpl1	sp|Q8R0X7|SGPL1_MOUSE Sphingosine-1-phosphate lyase 1 OS=Mus musculus GN=Sgpl1 PE=1 SV=1	1	6	12.7	63.676	568	0	9.5986	4952100	969270	532920	1056100	1009500	1107100	0.644856	-0.810683	-1.45554	3286
A1EGX6	Fibrous sheath CABYR-binding protein	Fscb	sp|A1EGX6|FSCB_MOUSE Fibrous sheath CABYR-binding protein OS=Mus musculus GN=Fscb PE=1 SV=1	1	7	7.4	114.98	1074	0	20.393	5852200	499780	1214500	1190600	1416200	889510	0.643682	-0.695475	-1.33916	48
Q68FL4;Q80SW1	Putative adenosylhomocysteinase 3	Ahcyl2	sp|Q68FL4|SAHH3_MOUSE Putative adenosylhomocysteinase 3 OS=Mus musculus GN=Ahcyl2 PE=1 SV=1	2	9	14.8	66.899	613	0	17.314	9352200	995000	1208000	1517000	2131700	1292200	0.643603	-0.202723	-0.846326	2173
P06909	Complement factor H	Cfh	sp|P06909|CFAH_MOUSE Complement factor H OS=Mus musculus GN=Cfh PE=1 SV=2	1	18	18.2	139.14	1234	0	51.094	17878000	1582000	2208000	2561700	2976400	2710400	0.64276	0.565984	-0.0767756	739
Q8BTZ4	Anaphase-promoting complex subunit 5	Anapc5	sp|Q8BTZ4|APC5_MOUSE Anaphase-promoting complex subunit 5 OS=Mus musculus GN=Anapc5 PE=1 SV=1	1	4	6.2	83.097	740	0.00072622	3.6339	1279200	203980	81444	164770	244810	167950	0.642509	-3.29229	-3.9348	2829
Q91YL2	E3 ubiquitin-protein ligase RNF126	Rnf126	sp|Q91YL2|RN126_MOUSE E3 ubiquitin-protein ligase RNF126 OS=Mus musculus GN=Rnf126 PE=1 SV=1	1	6	26.2	34.08	313	0	35.778	31405000	5264700	3273900	5063800	8132000	5488700	0.641698	1.71636	1.07466	3584
Q3V140	Acrosin-binding protein	Acrbp	sp|Q3V140|ACRBP_MOUSE Acrosin-binding protein OS=Mus musculus GN=Acrbp PE=1 SV=1	1	11	26.1	61.14	540	0	111.3	75558000	8934000	8936300	11263000	18138000	10939000	0.637745	2.81822	2.18047	1816
P30416	Peptidyl-prolyl cis-trans isomerase FKBP4;Peptidyl-prolyl cis-trans isomerase FKBP4, N-terminally processed	Fkbp4	sp|P30416|FKBP4_MOUSE Peptidyl-prolyl cis-trans isomerase FKBP4 OS=Mus musculus GN=Fkbp4 PE=1 SV=5	1	27	55.5	51.572	458	0	256.83	117350000	13360000	16318000	22426000	26698000	16817000	0.637029	3.54213	2.9051	961
Q9CQM2;Q99JH8	ER lumen protein-retaining receptor 2;ER lumen protein-retaining receptor 1	Kdelr2;Kdelr1	sp|Q9CQM2|ERD22_MOUSE ER lumen protein-retaining receptor 2 OS=Mus musculus GN=Kdelr2 PE=1 SV=1;sp|Q99JH8|ERD21_MOUSE ER lumen protein-retaining receptor 1 OS=Mus musculus GN=Kdelr1 PE=1 SV=1	2	2	13.2	24.454	212	0	56.447	10241000	1911500	861330	4530400	1138700	1276900	0.635498	0.0161492	-0.619349	3915
P47199	Quinone oxidoreductase	Cryz	sp|P47199|QOR_MOUSE Quinone oxidoreductase OS=Mus musculus GN=Cryz PE=1 SV=1	1	9	34.4	35.268	331	0	21.155	21355000	2689600	2870300	4238300	4888900	3222200	0.634664	1.12994	0.495276	1058
Q9DBT3	Coiled-coil domain-containing protein 97	Ccdc97	sp|Q9DBT3|CCD97_MOUSE Coiled-coil domain-containing protein 97 OS=Mus musculus GN=Ccdc97 PE=1 SV=1	1	3	12.1	38.724	340	0	7.4744	2453200	294570	399730	470600	605080	441450	0.634421	-1.88771	-2.52213	4445
Q11011	Puromycin-sensitive aminopeptidase	Npepps	sp|Q11011|PSA_MOUSE Puromycin-sensitive aminopeptidase OS=Mus musculus GN=Npepps PE=1 SV=2	1	14	15.8	103.32	920	0	17.236	5385400	497840	846990	995640	1175300	727920	0.634386	-0.967548	-1.60193	1583
G3UXL2;Q9D7G0	Ribose-phosphate pyrophosphokinase 1	Prps1l3;Prps1	tr|G3UXL2|G3UXL2_MOUSE Protein Prps1l3 OS=Mus musculus GN=Prps1l3 PE=3 SV=1;sp|Q9D7G0|PRPS1_MOUSE Ribose-phosphate pyrophosphokinase 1 OS=Mus musculus GN=Prps1 PE=1 SV=4	2	10	33.3	34.824	318	0	65.999	41912000	3888900	7326300	7261100	10218000	6364900	0.633512	2.07071	1.4372	397
Q3TKY6	Peptidyl-prolyl cis-trans isomerase CWC27 homolog	Cwc27	sp|Q3TKY6|CWC27_MOUSE Peptidyl-prolyl cis-trans isomerase CWC27 homolog OS=Mus musculus GN=Cwc27 PE=1 SV=1	1	3	9.4	53.542	469	0.00027278	5.6227	2239200	0	1222400	376310	640440	0	0.631659	-2.81718	-3.44883	1647
E9PY36		1700029H14Rik	tr|E9PY36|E9PY36_MOUSE Protein 1700029H14Rik OS=Mus musculus GN=1700029H14Rik PE=4 SV=1	1	5	26.2	26.497	240	0	8.1889	3995900	760500	393500	640850	891030	886690	0.631587	-1.21771	-1.84929	287
P69566	Ran-binding protein 9	Ranbp9	sp|P69566|RANB9_MOUSE Ran-binding protein 9 OS=Mus musculus GN=Ranbp9 PE=1 SV=1	1	14	24.7	71.011	653	0	101.67	19395000	2965900	2115700	2838100	4696800	3640600	0.630738	0.976519	0.345781	1383
P14106	Complement C1q subcomponent subunit B	C1qb	sp|P14106|C1QB_MOUSE Complement C1q subcomponent subunit B OS=Mus musculus GN=C1qb PE=1 SV=2	1	3	15.4	26.717	253	0	9.8808	5619800	952250	712520	724830	1296800	1835200	0.630608	-0.628205	-1.25881	813
O08856	RNA polymerase II elongation factor ELL	Ell	sp|O08856|ELL_MOUSE RNA polymerase II elongation factor ELL OS=Mus musculus GN=Ell PE=2 SV=2	1	7	13.3	67.146	602	0	6.501	1585800	169120	177000	364130	660380	66215	0.628709	-2.88134	-3.51005	463
Q9CPN9		2210010C04Rik	tr|Q9CPN9|Q9CPN9_MOUSE Protein 2210010C04Rik OS=Mus musculus GN=2210010C04Rik PE=1 SV=1	1	1	4.9	26.422	247	0	13.68	302140000	60643000	20242000	39581000	64600000	51661000	0.628238	4.77999	4.15175	3836
Q9QYR6	Microtubule-associated protein 1A;MAP1A heavy chain;MAP1 light chain LC2	Map1a	sp|Q9QYR6|MAP1A_MOUSE Microtubule-associated protein 1A OS=Mus musculus GN=Map1a PE=1 SV=2	1	4	1.7	300.14	2776	0.00026267	4.9412	105400	7771.9	22086	28532	32303	7479.1	0.627273	-6.60587	-7.23314	4725
Q9CX80	Cytoglobin	Cygb	sp|Q9CX80|CYGB_MOUSE Cytoglobin OS=Mus musculus GN=Cygb PE=1 SV=1	1	3	15.8	21.465	190	0.0027039	2.6972	1826800	180340	268460	190880	560560	304700	0.626542	-2.53669	-3.16324	4019
Q8BGZ2	Protein FAM168A	Fam168a	sp|Q8BGZ2|F168A_MOUSE Protein FAM168A OS=Mus musculus GN=Fam168a PE=2 SV=1	1	1	4.1	26.184	244	0.007409	2.0707	6137900	1164200	501500	760660	1574100	1126900	0.620853	-0.746338	-1.36719	2672
O88799	Zonadhesin	Zan	sp|O88799|ZAN_MOUSE Zonadhesin OS=Mus musculus GN=Zan PE=1 SV=1	1	6	1.4	579.91	5376	0.002741	2.8138	180170	27727	16723	32255	37443	24984	0.620459	-5.89586	-6.51631	666
Q8BWW9	Serine/threonine-protein kinase N2	Pkn2	sp|Q8BWW9|PKN2_MOUSE Serine/threonine-protein kinase N2 OS=Mus musculus GN=Pkn2 PE=1 SV=3	1	12	16.9	111.61	983	0	14.778	3369200	578860	437010	598760	1092000	581920	0.615406	-1.3551	-1.97051	2871
O70493	Sorting nexin-12	Snx12	sp|O70493|SNX12_MOUSE Sorting nexin-12 OS=Mus musculus GN=Snx12 PE=1 SV=1	1	5	22.4	19.116	165	0.00051308	4.5748	8852600	2981200	359990	1142600	2440200	1190000	0.614413	-0.313647	-0.92806	619
P53810	Phosphatidylinositol transfer protein alpha isoform	Pitpna	sp|P53810|PIPNA_MOUSE Phosphatidylinositol transfer protein alpha isoform OS=Mus musculus GN=Pitpna PE=1 SV=2	1	11	42.1	31.893	271	0	26.575	28184000	2984800	4609300	5368900	6715700	4212300	0.613113	1.52518	0.91207	1149
P24369	Peptidyl-prolyl cis-trans isomerase B	Ppib	sp|P24369|PPIB_MOUSE Peptidyl-prolyl cis-trans isomerase B OS=Mus musculus GN=Ppib PE=1 SV=2	1	11	44.9	23.713	216	0	118.31	191400000	5696900	72115000	31960000	32071000	24176000	0.613044	3.97523	3.36218	904
Q3TCH7	Cullin-4A	Cul4a	sp|Q3TCH7|CUL4A_MOUSE Cullin-4A OS=Mus musculus GN=Cul4a PE=1 SV=1	1	27	39.8	87.752	759	0	39.687	14185000	2028900	1749300	2713800	2757900	2656900	0.612751	0.547469	-0.0652828	1623
Q8C5L6	Inositol polyphosphate 5-phosphatase K	Inpp5k	sp|Q8C5L6|INP5K_MOUSE Inositol polyphosphate 5-phosphatase K OS=Mus musculus GN=Inpp5k PE=1 SV=2	1	8	19.9	54.158	468	0	84.32	50899000	6124700	7590600	7283600	14308000	9044200	0.612652	2.40306	1.79041	2968
Q8CJ67	Double-stranded RNA-binding protein Staufen homolog 2	Stau2	sp|Q8CJ67|STAU2_MOUSE Double-stranded RNA-binding protein Staufen homolog 2 OS=Mus musculus GN=Stau2 PE=1 SV=1	1	2	4.6	62.535	570	0.0087829	1.9555	75072	0	75072	0	0	0	0.6106	-4.32742	-4.93802	3137
Q60972	Histone-binding protein RBBP4	Rbbp4	sp|Q60972|RBBP4_MOUSE Histone-binding protein RBBP4 OS=Mus musculus GN=Rbbp4 PE=1 SV=5	1	13	43.8	47.655	425	0	212.85	129380000	11491000	26205000	23399000	32066000	20548000	0.608937	3.74702	3.13808	1982
Q80VP2	Spermatogenesis-associated protein 7 homolog	Spata7	sp|Q80VP2|SPAT7_MOUSE Spermatogenesis-associated protein 7 homolog OS=Mus musculus GN=Spata7 PE=1 SV=1	1	3	8.2	65.654	582	0.00028289	6.4108	1780600	295280	196640	265860	757100	204560	0.607684	-2.42444	-3.03213	2544
Q5XG71	Small subunit processome component 20 homolog	Utp20	sp|Q5XG71|UTP20_MOUSE Small subunit processome component 20 homolog OS=Mus musculus GN=Utp20 PE=1 SV=2	1	8	2.9	317.74	2788	0	8.0778	780160	66160	136110	249290	178700	56329	0.606649	-3.7699	-4.37655	1935
Q8BKE6	Cytochrome P450 20A1	Cyp20a1	sp|Q8BKE6|CP20A_MOUSE Cytochrome P450 20A1 OS=Mus musculus GN=Cyp20a1 PE=1 SV=1	1	1	3.9	52.149	462	0.0007148	3.3782	806160	411200	0	394970	0	0	0.606115	-3.95209	-4.5582	2735
P20918	Plasminogen;Plasmin heavy chain A;Activation peptide;Angiostatin;Plasmin heavy chain A, short form;Plasmin light chain B	Plg	sp|P20918|PLMN_MOUSE Plasminogen OS=Mus musculus GN=Plg PE=1 SV=3	1	6	7	90.807	812	0	6.8377	3236400	228870	573930	555000	667710	376530	0.605736	-1.83751	-2.44325	877
Q9D1Q6	Endoplasmic reticulum resident protein 44	Erp44	sp|Q9D1Q6|ERP44_MOUSE Endoplasmic reticulum resident protein 44 OS=Mus musculus GN=Erp44 PE=1 SV=1	1	6	15.8	46.852	406	0	14.935	15827000	1257000	3238300	2734100	3758500	2331900	0.60358	0.637169	0.0335894	4149
Q8C3P7	N6-adenosine-methyltransferase subunit METTL3	Mettl3	sp|Q8C3P7|MTA70_MOUSE N6-adenosine-methyltransferase subunit METTL3 OS=Mus musculus GN=Mettl3 PE=1 SV=2	1	7	14	64.615	580	0	18.334	3335800	390770	595410	730340	1043400	429580	0.603417	-1.42743	-2.03085	2951
Q3U308	Cytoplasmic tRNA 2-thiolation protein 2	Ctu2	sp|Q3U308|CTU2_MOUSE Cytoplasmic tRNA 2-thiolation protein 2 OS=Mus musculus GN=Ctu2 PE=1 SV=1	1	5	11.1	56.104	514	0	14.398	2411800	347410	339050	394530	697120	428350	0.602989	-1.91889	-2.52188	1689
Q8BGI5	Peroxisome assembly protein 26	Pex26	sp|Q8BGI5|PEX26_MOUSE Peroxisome assembly protein 26 OS=Mus musculus GN=Pex26 PE=1 SV=2	1	2	7.2	34.016	305	0.00094563	3.27	393380	84937	0	98520	124860	85068	0.602975	-4.19051	-4.79348	2661
Q9ER73	Elongator complex protein 4	Elp4	sp|Q9ER73|ELP4_MOUSE Elongator complex protein 4 OS=Mus musculus GN=Elp4 PE=1 SV=2	1	3	10.4	46.325	422	0.00072886	3.694	635230	131100	42828	51250	261310	91427	0.602326	-4.11498	-4.7173	4516
Q99MS8	Tubulin polyglutamylase complex subunit 1	Tpgs1	sp|Q99MS8|TPGS1_MOUSE Tubulin polyglutamylase complex subunit 1 OS=Mus musculus GN=Tpgs1 PE=1 SV=1	1	4	14.5	32.625	303	0.00026483	5.1074	5363000	1207200	531120	891760	1139600	1463800	0.600217	-0.699416	-1.29963	3799
Q3TT38	Uncharacterized protein C6orf106 homolog	D17Wsu92e	sp|Q3TT38|CF106_MOUSE Uncharacterized protein C6orf106 homolog OS=Mus musculus GN=D17Wsu92e PE=2 SV=2	1	2	8.6	32.081	291	0.00071805	3.4478	3184200	297950	549890	452890	812560	520510	0.598693	-1.68515	-2.28384	1656
Q3UBZ5	MIF4G domain-containing protein	Mif4gd	sp|Q3UBZ5|MI4GD_MOUSE MIF4G domain-containing protein OS=Mus musculus GN=Mif4gd PE=1 SV=1	1	2	11.7	25.493	222	0.00050327	4.2829	2158600	151850	471490	673110	355940	230920	0.598632	-2.28238	-2.88101	1708
Q9JJF2	Sperm-associated antigen 4 protein	Spag4	sp|Q9JJF2|SPAG4_MOUSE Sperm-associated antigen 4 protein OS=Mus musculus GN=Spag4 PE=1 SV=3	1	3	10.4	48.581	443	0	16.447	5638000	1868700	306760	1040800	1091700	1100600	0.597525	-0.782887	-1.38041	4603
Q4VC33	Macrophage erythroblast attacher	Maea	sp|Q4VC33|MAEA_MOUSE Macrophage erythroblast attacher OS=Mus musculus GN=Maea PE=1 SV=1	1	4	9.3	45.336	396	0	14.661	3085800	293790	595250	402510	905910	576310	0.59622	-1.64059	-2.23681	1845
Q9CRD2	ER membrane protein complex subunit 2	Emc2	sp|Q9CRD2|EMC2_MOUSE ER membrane protein complex subunit 2 OS=Mus musculus GN=Emc2 PE=1 SV=1	1	7	26.6	34.934	297	0	40.994	12380000	2226600	1452500	2587400	2898000	2214700	0.593147	0.460816	-0.132331	3972
Q925E7	Serine/threonine-protein phosphatase 2A 55 kDa regulatory subunit B delta isoform	Ppp2r2d	sp|Q925E7|2ABD_MOUSE Serine/threonine-protein phosphatase 2A 55 kDa regulatory subunit B delta isoform OS=Mus musculus GN=Ppp2r2d PE=1 SV=1	1	7	20.3	51.957	453	0.0031104	2.554	3196700	380400	525480	764620	933530	355060	0.589871	-1.5505	-2.14037	3691
Q64152	Transcription factor BTF3	Btf3	sp|Q64152|BTF3_MOUSE Transcription factor BTF3 OS=Mus musculus GN=Btf3 PE=1 SV=3	1	4	25	22.031	204	0	51.597	41966000	2881400	10767000	6145200	10573000	7540600	0.589774	2.08841	1.49864	2136
Q9D4V3	Coiled-coil domain-containing protein 83	Ccdc83	sp|Q9D4V3|CCD83_MOUSE Coiled-coil domain-containing protein 83 OS=Mus musculus GN=Ccdc83 PE=2 SV=1	1	1	3.9	35.641	305	0.0027155	2.7367	681900	86903	135080	154230	145150	160540	0.588154	-3.59715	-4.1853	4216
Q8R0J7	Vacuolar protein sorting-associated protein 37B	Vps37b	sp|Q8R0J7|VP37B_MOUSE Vacuolar protein sorting-associated protein 37B OS=Mus musculus GN=Vps37b PE=1 SV=1	1	4	15.8	31.055	285	0.0002809	6.2188	1987000	593640	122700	202420	515890	529290	0.585743	-2.28284	-2.86859	3282
Q91V09	WD repeat-containing protein 13	Wdr13	sp|Q91V09|WDR13_MOUSE WD repeat-containing protein 13 OS=Mus musculus GN=Wdr13 PE=1 SV=1	1	6	16.9	53.663	485	0	18.33	11800000	1120800	2359900	2468400	3195000	1517500	0.580682	0.303288	-0.277393	3487
Q99P69	Kinetochore protein Nuf2	Nuf2	sp|Q99P69|NUF2_MOUSE Kinetochore protein Nuf2 OS=Mus musculus GN=Nuf2 PE=1 SV=2	1	5	12.7	54.594	463	0.0002745	5.7324	3564400	390620	613680	819520	702180	567060	0.58036	-1.42896	-2.00932	3817
Q8CG76	Aflatoxin B1 aldehyde reductase member 2	Akr7a2	sp|Q8CG76|ARK72_MOUSE Aflatoxin B1 aldehyde reductase member 2 OS=Mus musculus GN=Akr7a2 PE=1 SV=3	1	11	36.2	40.612	367	0	127.94	56145000	7111200	6640600	9697600	9628400	9652500	0.579852	2.38153	1.80168	3076
Q64337	Sequestosome-1	Sqstm1	sp|Q64337|SQSTM_MOUSE Sequestosome-1 OS=Mus musculus GN=Sqstm1 PE=1 SV=1	1	2	6.3	48.162	442	0.00051867	4.7153	1714100	165510	343140	284290	392200	336680	0.5792	-2.46889	-3.04809	2143
A6H8H2	DENN domain-containing protein 4C	Dennd4c	sp|A6H8H2|DEN4C_MOUSE DENN domain-containing protein 4C OS=Mus musculus GN=Dennd4c PE=1 SV=1	1	18	11.3	211.46	1906	0	31.939	6008500	797310	940550	1570800	1901800	600010	0.57686	-0.609766	-1.18663	131
P62311	U6 snRNA-associated Sm-like protein LSm3	Lsm3	sp|P62311|LSM3_MOUSE U6 snRNA-associated Sm-like protein LSm3 OS=Mus musculus GN=Lsm3 PE=1 SV=2	1	2	19.6	11.845	102	0	14.645	66830000	3038600	20733000	8329300	15422000	10697000	0.57473	2.58434	2.00961	1296
Q91W90	Thioredoxin domain-containing protein 5	Txndc5	sp|Q91W90|TXND5_MOUSE Thioredoxin domain-containing protein 5 OS=Mus musculus GN=Txndc5 PE=1 SV=2	1	5	17.5	46.415	417	0	11.955	4459900	316410	942090	1424600	655500	478120	0.573936	-1.27818	-1.85212	3528
Q9Z0Y1	Dynactin subunit 3	Dctn3	sp|Q9Z0Y1|DCTN3_MOUSE Dynactin subunit 3 OS=Mus musculus GN=Dctn3 PE=1 SV=2	1	9	43.5	20.978	186	0	20.52	97764000	12688000	12334000	15353000	22263000	15704000	0.57366	3.23962	2.66596	4883
P01898;O19441;G3UXE9	H-2 class I histocompatibility antigen, Q10 alpha chain	H2-Q10	sp|P01898|HA10_MOUSE H-2 class I histocompatibility antigen, Q10 alpha chain OS=Mus musculus GN=H2-Q10 PE=1 SV=3	3	7	24.9	37.251	325	0	11.087	5869300	507860	1197600	1274200	909210	1118900	0.572075	-0.765622	-1.3377	716
O88487	Cytoplasmic dynein 1 intermediate chain 2	Dync1i2	sp|O88487|DC1I2_MOUSE Cytoplasmic dynein 1 intermediate chain 2 OS=Mus musculus GN=Dync1i2 PE=1 SV=1	1	14	27.3	68.393	612	0	323.31	95204000	12228000	14009000	22268000	22055000	12456000	0.571314	3.30249	2.73118	640
Q8BH48	Ubiquitin-associated protein 1	Ubap1	sp|Q8BH48|UBAP1_MOUSE Ubiquitin-associated protein 1 OS=Mus musculus GN=Ubap1 PE=1 SV=1	1	3	5	55.028	502	0.0063667	2.0967	4169900	154310	1376300	293710	1272700	714020	0.571062	-1.52561	-2.09667	2676
P08113	Endoplasmin	Hsp90b1	sp|P08113|ENPL_MOUSE Endoplasmin OS=Mus musculus GN=Hsp90b1 PE=1 SV=2	1	45	49.4	92.475	802	0	323.31	370390000	31502000	69224000	77890000	59211000	60181000	0.570793	5.13706	4.56627	751
Q3UPF5	Zinc finger CCCH-type antiviral protein 1	Zc3hav1	sp|Q3UPF5|ZCCHV_MOUSE Zinc finger CCCH-type antiviral protein 1 OS=Mus musculus GN=Zc3hav1 PE=1 SV=1	1	4	6	106.69	946	0.00026427	5.0664	781920	25578	295940	131850	185480	73365	0.57058	-3.93123	-4.50181	1767
P70697	Uroporphyrinogen decarboxylase	Urod	sp|P70697|DCUP_MOUSE Uroporphyrinogen decarboxylase OS=Mus musculus GN=Urod PE=1 SV=2	1	6	23.7	40.691	367	0	12.564	8115000	649360	1121400	970490	1989400	876330	0.570306	-0.637519	-1.20782	1419
Q8BMA6	Signal recognition particle subunit SRP68	Srp68	sp|Q8BMA6|SRP68_MOUSE Signal recognition particle subunit SRP68 OS=Mus musculus GN=Srp68 PE=1 SV=2	1	13	24.3	70.573	625	0	26.834	10977000	2326800	867900	2051700	1572300	2421100	0.570092	0.0980457	-0.472047	2756
Q80ZK9	WD and tetratricopeptide repeats protein 1	Wdtc1	sp|Q80ZK9|WDTC1_MOUSE WD and tetratricopeptide repeats protein 1 OS=Mus musculus GN=Wdtc1 PE=1 SV=1	1	5	6.9	75.732	677	0	8.2127	1821000	328020	220480	362590	398960	364850	0.568693	-2.30504	-2.87373	2608
Q9D024	Coiled-coil domain-containing protein 47	Ccdc47	sp|Q9D024|CCD47_MOUSE Coiled-coil domain-containing protein 47 OS=Mus musculus GN=Ccdc47 PE=1 SV=2	1	4	6.6	55.843	483	0.00028027	6.1604	2201800	634790	157280	378300	457100	494230	0.567881	-2.07326	-2.64114	4091
Q9QYJ3	DnaJ homolog subfamily B member 1	Dnajb1	sp|Q9QYJ3|DNJB1_MOUSE DnaJ homolog subfamily B member 1 OS=Mus musculus GN=Dnajb1 PE=1 SV=3	1	17	38.2	38.167	340	0	72.618	71572000	9281700	11270000	13588000	15625000	13646000	0.567695	2.94308	2.37538	4721
Q99KW3	TRIO and F-actin-binding protein	Triobp	sp|Q99KW3|TARA_MOUSE TRIO and F-actin-binding protein OS=Mus musculus GN=Triobp PE=1 SV=3	1	5	2.9	223.37	2014	0	6.5655	215650	68019	8136.6	39846	30387	28991	0.56556	-5.8231	-6.38866	3749
P13439	Uridine 5-monophosphate synthase;Orotate phosphoribosyltransferase;Orotidine 5-phosphate decarboxylase	Umps	sp|P13439|UMPS_MOUSE Uridine 5-monophosphate synthase OS=Mus musculus GN=Umps PE=1 SV=3	1	4	11	52.292	481	0	8.8836	4604900	734240	515520	667360	1106600	849670	0.565284	-1.11453	-1.67981	810
O35685	Nuclear migration protein nudC	Nudc	sp|O35685|NUDC_MOUSE Nuclear migration protein nudC OS=Mus musculus GN=Nudc PE=1 SV=1	1	27	64.5	38.358	332	0	155.48	258940000	27982000	44159000	48617000	54073000	44466000	0.564701	4.72121	4.15651	531
A2AFS3	UPF0577 protein KIAA1324	Kiaa1324	sp|A2AFS3|K1324_MOUSE UPF0577 protein KIAA1324 OS=Mus musculus GN=Kiaa1324 PE=1 SV=1	1	3	4	110.68	1009	0.00072639	3.6469	603500	144600	40550	117310	117640	87522	0.5645	-4.12153	-4.68603	66
P97823	Acyl-protein thioesterase 1	Lypla1	sp|P97823|LYPA1_MOUSE Acyl-protein thioesterase 1 OS=Mus musculus GN=Lypla1 PE=1 SV=1	1	3	16.5	24.687	230	0	61.061	31120000	1957800	7179600	4162700	7588600	4485500	0.564252	1.4918	0.927548	1495
Q8BW10	RNA-binding protein NOB1	Nob1	sp|Q8BW10|NOB1_MOUSE RNA-binding protein NOB1 OS=Mus musculus GN=Nob1 PE=1 SV=1	1	6	14.6	45.463	403	0	7.8069	5197800	455170	1111300	685780	1746600	807200	0.564039	-0.906619	-1.47066	2859
Q80VE5		Tbc1d22b	tr|Q80VE5|Q80VE5_MOUSE Protein Tbc1d22b OS=Mus musculus GN=Tbc1d22b PE=1 SV=1	1	2	5.5	59.127	505	0.00051827	4.712	492300	0	111910	114530	148690	85252	0.561599	-4.03306	-4.59465	2539
P38647	Stress-70 protein, mitochondrial	Hspa9	sp|P38647|GRP75_MOUSE Stress-70 protein, mitochondrial OS=Mus musculus GN=Hspa9 PE=1 SV=3	1	22	35.5	73.46	679	0	171.94	19196000	3312300	2069300	2608700	4453500	4116400	0.560009	0.969477	0.409468	1012
Q9EQQ2	Protein YIPF5	Yipf5	sp|Q9EQQ2|YIPF5_MOUSE Protein YIPF5 OS=Mus musculus GN=Yipf5 PE=1 SV=1	1	1	3.5	27.873	257	0.0027404	2.8125	26921000	8364400	1289000	3757600	4625900	5423400	0.559603	1.29584	0.736237	4508
P00329	Alcohol dehydrogenase 1	Adh1	sp|P00329|ADH1_MOUSE Alcohol dehydrogenase 1 OS=Mus musculus GN=Adh1 PE=1 SV=2	1	7	18.9	39.771	375	0	11.198	16696000	1979900	2705100	4324900	3131800	2434300	0.559114	0.790648	0.231534	688
B9EJ86;Q9ER64	Oxysterol-binding protein	Osbpl8	sp|B9EJ86|OSBL8_MOUSE Oxysterol-binding protein-related protein 8 OS=Mus musculus GN=Osbpl8 PE=1 SV=1	2	8	14.5	101.27	889	0	11.746	1847600	381530	214780	386580	454420	354690	0.558403	-2.22522	-2.78362	186
P02468	Laminin subunit gamma-1	Lamc1	sp|P02468|LAMC1_MOUSE Laminin subunit gamma-1 OS=Mus musculus GN=Lamc1 PE=1 SV=2	1	3	2.9	177.3	1607	0	7.2285	388050	53003	55104	40185	56657	183100	0.555655	-4.63311	-5.18876	720
Q9QZB9	Dynactin subunit 5	Dctn5	sp|Q9QZB9|DCTN5_MOUSE Dynactin subunit 5 OS=Mus musculus GN=Dctn5 PE=1 SV=1	1	4	17	20.14	182	0	8.3146	19170000	2834900	2229700	2824300	4985800	2977600	0.555162	0.906215	0.351053	4735
Q99J83	Autophagy protein 5	Atg5	sp|Q99J83|ATG5_MOUSE Autophagy protein 5 OS=Mus musculus GN=Atg5 PE=1 SV=1	1	3	11.6	32.402	275	0.00050277	4.2675	4203000	688000	495300	789430	1239600	533600	0.552714	-1.20288	-1.75559	3705
A3KGB4	TBC1 domain family member 8B	Tbc1d8b	sp|A3KGB4|TBC8B_MOUSE TBC1 domain family member 8B OS=Mus musculus GN=Tbc1d8b PE=1 SV=1	1	4	4.4	127.89	1114	0.0043271	2.2766	391430	101750	0	155440	57223	47338	0.552516	-4.6283	-5.18082	118
Q8VC30	Bifunctional ATP-dependent dihydroxyacetone kinase/FAD-AMP lyase (cyclizing);ATP-dependent dihydroxyacetone kinase;FAD-AMP lyase (cyclizing)	Dak	sp|Q8VC30|TKFC_MOUSE Triokinase/FMN cyclase OS=Mus musculus GN=Tkfc PE=1 SV=1	1	19	43.9	59.69	578	0	323.31	258810000	32083000	35183000	49345000	49988000	40240000	0.551308	4.64256	4.09125	3377
Q9JKK7	Tropomodulin-2	Tmod2	sp|Q9JKK7|TMOD2_MOUSE Tropomodulin-2 OS=Mus musculus GN=Tmod2 PE=1 SV=2	1	6	20.8	39.51	351	0	6.9151	3718500	944030	175740	246560	547030	1308300	0.550203	-1.72461	-2.27481	4627
Q7TS74	Cytoskeleton-associated protein 2-like	Ckap2l	sp|Q7TS74|CKP2L_MOUSE Cytoskeleton-associated protein 2-like OS=Mus musculus GN=Ckap2l PE=1 SV=1	1	4	6.4	82.998	745	0.00073602	3.875	1694500	78125	424180	778710	342940	58983	0.550152	-2.88653	-3.43668	2474
Q9JJA4	Ribosome biogenesis protein WDR12	Wdr12	sp|Q9JJA4|WDR12_MOUSE Ribosome biogenesis protein WDR12 OS=Mus musculus GN=Wdr12 PE=1 SV=1	1	9	27	47.346	423	0	16.618	19596000	2126900	3594300	3561000	4445500	3484500	0.549909	1.03812	0.488211	4601
Q91YJ3	Thymocyte nuclear protein 1	Thyn1	sp|Q91YJ3|THYN1_MOUSE Thymocyte nuclear protein 1 OS=Mus musculus GN=Thyn1 PE=1 SV=1	1	10	41.2	26.178	226	0	38.627	30419000	139480	21124000	2259300	3254200	1787900	0.547957	0.348407	-0.19955	3582
Q8BTI8	Serine/arginine repetitive matrix protein 2	Srrm2	sp|Q8BTI8|SRRM2_MOUSE Serine/arginine repetitive matrix protein 2 OS=Mus musculus GN=Srrm2 PE=1 SV=3	1	44	22.6	294.84	2703	0	323.31	40168000	4519900	6648300	4496900	17821000	5338700	0.547617	2.02323	1.47562	2819
P47941	Crk-like protein	Crkl	sp|P47941|CRKL_MOUSE Crk-like protein OS=Mus musculus GN=Crkl PE=1 SV=2	1	1	5	33.83	303	0.0079983	2.006	731990	0	113770	106430	213290	109510	0.546165	-3.77441	-4.32057	1071
P21956	Lactadherin	Mfge8	sp|P21956|MFGM_MOUSE Lactadherin OS=Mus musculus GN=Mfge8 PE=1 SV=3	1	2	4.8	51.24	463	0.0039284	2.3825	409080	97500	0	47200	98086	166290	0.545527	-4.33811	-4.88364	887
Q6PD19	UPF0668 protein C10orf76 homolog		sp|Q6PD19|CJ076_MOUSE UPF0668 protein C10orf76 homolog OS=Mus musculus PE=1 SV=2	1	6	9	78.631	689	0.00027617	5.848	4336400	544370	684070	425520	1232300	1119800	0.54514	-1.14644	-1.69158	2315
Q8R3R8	Gamma-aminobutyric acid receptor-associated protein-like 1	Gabarapl1	sp|Q8R3R8|GBRL1_MOUSE Gamma-aminobutyric acid receptor-associated protein-like 1 OS=Mus musculus GN=Gabarapl1 PE=1 SV=2	1	3	21.4	14.044	117	0.0031327	2.6288	14064000	0	4818800	1669800	4347300	0	0.544887	-1.08186	-1.62675	3343
Q9R008	Mevalonate kinase	Mvk	sp|Q9R008|KIME_MOUSE Mevalonate kinase OS=Mus musculus GN=Mvk PE=1 SV=1	1	5	16.5	41.877	395	0	6.7748	3196700	446940	428410	482510	698150	641900	0.544557	-1.62685	-2.17141	4748
Q9D1K7	UPF0687 protein C20orf27 homolog		sp|Q9D1K7|CT027_MOUSE UPF0687 protein C20orf27 homolog OS=Mus musculus PE=1 SV=3	1	6	48.9	19.476	174	0	193.66	314610000	16771000	86892000	44636000	80571000	39921000	0.544556	4.82006	4.2755	4141
P05064	Fructose-bisphosphate aldolase A	Aldoa	sp|P05064|ALDOA_MOUSE Fructose-bisphosphate aldolase A OS=Mus musculus GN=Aldoa PE=1 SV=2	1	19	58.8	39.355	364	0	297.62	384840000	40260000	68014000	73724000	82618000	60699000	0.544445	5.27494	4.7305	727
P62983;A0A0A6YW67;P62984;P0CG49;P0CG50;J3QK04;D3YYZ2	Ubiquitin-40S ribosomal protein S27a;Ubiquitin;40S ribosomal protein S27a;Ubiquitin-60S ribosomal protein L40;Ubiquitin;60S ribosomal protein L40;Polyubiquitin-B;Ubiquitin;Polyubiquitin-C;Ubiquitin;Ubiquitin-related 1;Ubiquitin-related 2	Rps27a;Gm8797;Uba52;Ubb;Ubc;Gm7808	sp|P62983|RS27A_MOUSE Ubiquitin-40S ribosomal protein S27a OS=Mus musculus GN=Rps27a PE=1 SV=2;tr|A0A0A6YW67|A0A0A6YW67_MOUSE MCG23377, isoform CRA_b OS=Mus musculus GN=Gm8797 PE=4 SV=1;sp|P62984|RL40_MOUSE Ubiquitin-60S ribosomal protein L40 OS=Mus muscul	7	8	51.3	17.951	156	0	175.39	1739900000	123770000	385040000	254960000	379300000	277530000	0.544363	7.33553	6.79117	1344
Q8CHI8	E1A-binding protein p400	Ep400	sp|Q8CHI8|EP400_MOUSE E1A-binding protein p400 OS=Mus musculus GN=Ep400 PE=1 SV=3	1	7	2.9	337.18	3072	0.00027624	5.8517	416960	71988	53425	77588	98862	80185	0.54417	-4.44607	-4.99024	3101
Q9JM76	Actin-related protein 2/3 complex subunit 3	Arpc3	sp|Q9JM76|ARPC3_MOUSE Actin-related protein 2/3 complex subunit 3 OS=Mus musculus GN=Arpc3 PE=1 SV=3	1	5	30.9	20.524	178	0	11.755	24560000	2176700	4592400	3881900	6573500	3192500	0.543954	1.22563	0.681675	4652
P31254	Ubiquitin-like modifier-activating enzyme 1 Y	Uba1y	sp|P31254|UBA1Y_MOUSE Ubiquitin-like modifier-activating enzyme 1 Y OS=Mus musculus GN=Uba1y PE=1 SV=2	1	16	18.4	118.04	1058	0	27.99	10774000	1475500	1358000	1878100	2282600	1701300	0.542799	0.0651223	-0.477676	966
Q80W47	WD repeat domain phosphoinositide-interacting protein 2	Wipi2	sp|Q80W47|WIPI2_MOUSE WD repeat domain phosphoinositide-interacting protein 2 OS=Mus musculus GN=Wipi2 PE=1 SV=1	1	4	10.8	48.477	445	0	8.0225	9789300	2006300	1006100	1973100	1839900	2021300	0.540416	0.0680507	-0.472365	2551
P59999	Actin-related protein 2/3 complex subunit 4	Arpc4	sp|P59999|ARPC4_MOUSE Actin-related protein 2/3 complex subunit 4 OS=Mus musculus GN=Arpc4 PE=1 SV=3	1	4	22.6	19.667	168	0	31.369	27011000	2092200	5663100	4486400	6427400	3610600	0.539317	1.3436	0.804286	1223
Q9CR26	Vacuolar protein sorting-associated protein VTA1 homolog	Vta1	sp|Q9CR26|VTA1_MOUSE Vacuolar protein sorting-associated protein VTA1 homolog OS=Mus musculus GN=Vta1 PE=1 SV=1	1	6	23	33.913	309	0	11.564	24049000	3575700	3611000	5143900	5519400	4169500	0.539051	1.40534	0.866291	3951
Q9WUL7	ADP-ribosylation factor-like protein 3	Arl3	sp|Q9WUL7|ARL3_MOUSE ADP-ribosylation factor-like protein 3 OS=Mus musculus GN=Arl3 PE=1 SV=1	1	10	64.8	20.486	182	0	323.31	679390000	74855000	119350000	113200000	170710000	110950000	0.536705	6.12023	5.58352	4827
Q3UW53	Protein Niban	Fam129a	sp|Q3UW53|NIBAN_MOUSE Protein Niban OS=Mus musculus GN=Fam129a PE=1 SV=2	1	23	31.1	102.65	926	0	62.936	30240000	3852500	4836000	6706500	5784200	5246400	0.535143	1.66593	1.13078	1787
Q6ZPU9	KIF1-binding protein	Kbp	sp|Q6ZPU9|KBP_MOUSE KIF1-binding protein OS=Mus musculus GN=Kif1bp PE=1 SV=2	1	8	16.5	71.051	617	0	13.402	4530600	1044800	412680	753130	1024000	925720	0.533398	-1.05246	-1.58586	2386
Q9JMC3	DnaJ homolog subfamily A member 4	Dnaja4	sp|Q9JMC3|DNJA4_MOUSE DnaJ homolog subfamily A member 4 OS=Mus musculus GN=Dnaja4 PE=1 SV=1	1	22	49.1	44.901	397	0	189.91	171750000	17153000	32780000	36486000	36647000	25088000	0.53232	4.12087	3.58855	4658
Q9EP71;Q2M3X8	Ankycorbin	Rai14	sp|Q9EP71|RAI14_MOUSE Ankycorbin OS=Mus musculus GN=Rai14 PE=1 SV=1	2	49	49.7	108.85	979	0	323.31	86972000	15697000	8862800	15505000	15414000	17206000	0.530413	3.11148	2.58107	4478
Q61749	Translation initiation factor eIF-2B subunit delta	Eif2b4	sp|Q61749|EI2BD_MOUSE Translation initiation factor eIF-2B subunit delta OS=Mus musculus GN=Eif2b4 PE=1 SV=2	1	5	12.2	57.624	524	0	8.0086	4511300	695310	572580	793220	990740	800070	0.52983	-1.11355	-1.64338	2050
P61600	N-alpha-acetyltransferase 20	Naa20	sp|P61600|NAA20_MOUSE N-alpha-acetyltransferase 20 OS=Mus musculus GN=Naa20 PE=1 SV=1	1	1	9.6	20.368	178	0.00050088	4.1799	1903400	0	584600	303660	455970	333110	0.529571	-2.36987	-2.89944	1266
P58021	Transmembrane 9 superfamily member 2	Tm9sf2	sp|P58021|TM9S2_MOUSE Transmembrane 9 superfamily member 2 OS=Mus musculus GN=Tm9sf2 PE=1 SV=1	1	5	10.1	75.329	662	0	19.564	8205300	2122300	619260	1149500	2115200	1549800	0.529452	-0.252446	-0.781898	1199
Q9D451		2012-09-01	tr|Q9D451|Q9D451_MOUSE Protein Sept12 OS=Mus musculus GN=Sept12 PE=2 SV=1	1	3	8.8	36.019	317	0.00051387	4.606	6692900	954690	899750	1203200	1135500	1457100	0.529364	-0.559306	-1.08867	4195
Q9Z1G3	V-type proton ATPase subunit C 1	Atp6v1c1	sp|Q9Z1G3|VATC1_MOUSE V-type proton ATPase subunit C 1 OS=Mus musculus GN=Atp6v1c1 PE=1 SV=4	1	5	12.6	43.887	382	0.00026674	5.2662	9186500	1110300	1530900	1912100	1893600	1529500	0.529065	-0.0672916	-0.596356	4897
Q8C0M9	Isoaspartyl peptidase/L-asparaginase;Isoaspartyl peptidase/L-asparaginase alpha chain;Isoaspartyl peptidase/L-asparaginase beta chain	Asrgl1	sp|Q8C0M9|ASGL1_MOUSE Isoaspartyl peptidase/L-asparaginase OS=Mus musculus GN=Asrgl1 PE=1 SV=1	1	10	42.3	33.95	326	0	253.63	357890000	26253000	77369000	59566000	68976000	55644000	0.528764	5.04379	4.51503	2922
Q9QXL8	Nucleoside diphosphate kinase 7	Nme7	sp|Q9QXL8|NDK7_MOUSE Nucleoside diphosphate kinase 7 OS=Mus musculus GN=Nme7 PE=1 SV=1	1	5	14.2	44.433	395	0.00028114	6.2371	5235800	883800	651550	1016700	1172100	909280	0.525338	-0.851812	-1.37715	4686
A2RSQ0	DENN domain-containing protein 5B	Dennd5b	sp|A2RSQ0|DEN5B_MOUSE DENN domain-containing protein 5B OS=Mus musculus GN=Dennd5b PE=1 SV=2	1	26	21.4	144.63	1274	0	50.949	14556000	2484900	1927200	3125700	3723600	2220100	0.5226	0.673427	0.150826	109
B2RUM3		AU015836	tr|B2RUM3|B2RUM3_MOUSE AU015836 protein OS=Mus musculus GN=AU015836 PE=1 SV=1	1	4	11	30.529	263	0	13.843	45018000	0	38569000	1775300	3428500	1244700	0.521743	0.0834055	-0.438337	167
Q91V12	Cytosolic acyl coenzyme A thioester hydrolase	Acot7	sp|Q91V12|BACH_MOUSE Cytosolic acyl coenzyme A thioester hydrolase OS=Mus musculus GN=Acot7 PE=1 SV=2	1	5	18.6	42.536	381	0	36.322	38595000	5781500	5010000	6157700	8593100	7246600	0.521444	1.97055	1.44911	3488
O88456	Calpain small subunit 1	Capns1	sp|O88456|CPNS1_MOUSE Calpain small subunit 1 OS=Mus musculus GN=Capns1 PE=1 SV=1	1	4	17.5	28.463	269	0	65.316	21833000	2239200	3617900	3223700	7471700	2354300	0.521364	1.05141	0.530046	637
Q99N11	Dual specificity protein phosphatase 22	Dusp22	sp|Q99N11|DUS22_MOUSE Dual specificity protein phosphatase 22 OS=Mus musculus GN=Dusp22 PE=1 SV=1	1	3	17.9	20.997	184	0.0005015	4.2089	3295700	528080	303990	342670	1111900	414700	0.520837	-1.77772	-2.29856	3806
Q9Z2U1;D3YX79	Proteasome subunit alpha type-5;Proteasome subunit alpha type	Psma5;Gm8394	sp|Q9Z2U1|PSA5_MOUSE Proteasome subunit alpha type-5 OS=Mus musculus GN=Psma5 PE=1 SV=1;tr|D3YX79|D3YX79_MOUSE Proteasome subunit alpha type OS=Mus musculus GN=Gm8394 PE=3 SV=1	2	11	52.7	26.411	241	0	323.31	314170000	30498000	59607000	57593000	82138000	40198000	0.520204	4.95521	4.43501	4940
Q9D9S3	RWD domain-containing protein 2A	Rwdd2a	sp|Q9D9S3|RWD2A_MOUSE RWD domain-containing protein 2A OS=Mus musculus GN=Rwdd2a PE=1 SV=1	1	5	17.5	33.915	292	0	51.471	14832000	2886700	1789700	2763300	3709200	2808200	0.519759	0.725308	0.205548	4340
Q62188	Dihydropyrimidinase-related protein 3	Dpysl3	sp|Q62188|DPYL3_MOUSE Dihydropyrimidinase-related protein 3 OS=Mus musculus GN=Dpysl3 PE=1 SV=1	1	26	62.6	61.936	570	0	323.31	642970000	88386000	82870000	126590000	110720000	109500000	0.519212	5.95945	5.44024	2084
Q8C7R4	Ubiquitin-like modifier-activating enzyme 6	Uba6	sp|Q8C7R4|UBA6_MOUSE Ubiquitin-like modifier-activating enzyme 6 OS=Mus musculus GN=Uba6 PE=1 SV=1	1	22	24.9	117.96	1053	0	54.704	12132000	1347100	1900900	2248700	2696600	1653800	0.519016	0.218265	-0.300751	3000
Q9WTZ1	RING-box protein 2	Rnf7	sp|Q9WTZ1|RBX2_MOUSE RING-box protein 2 OS=Mus musculus GN=Rnf7 PE=3 SV=1	1	1	19.5	12.707	113	0.0031313	2.6185	1613100	0	604260	298230	710620	0	0.518904	-3.34969	-3.8686	4812
Q8R0S2;Q3TES0	IQ motif and SEC7 domain-containing protein 1	Iqsec1	sp|Q8R0S2|IQEC1_MOUSE IQ motif and SEC7 domain-containing protein 1 OS=Mus musculus GN=Iqsec1 PE=1 SV=2	2	6	6.1	108.01	961	0	6.5828	1485400	293770	191800	268700	369040	329470	0.518108	-2.5357	-3.0538	3284
A0A087WRT9;A0A087WRF5		Gm28490;Gm21739	tr|A0A087WRT9|A0A087WRT9_MOUSE Protein Gm28490 OS=Mus musculus GN=Gm28490 PE=4 SV=1;tr|A0A087WRF5|A0A087WRF5_MOUSE Protein 1700040F15Rik OS=Mus musculus GN=Gm21739 PE=4 SV=1	2	5	24.8	25.715	222	0	22.404	9662200	1139400	1902900	1344300	2604800	2222000	0.517005	0.096221	-0.420784	17
Q9QZM0	Ubiquilin-2	Ubqln2	sp|Q9QZM0|UBQL2_MOUSE Ubiquilin-2 OS=Mus musculus GN=Ubqln2 PE=1 SV=2	1	6	13.5	67.35	638	0	9.538	10065000	1106300	1401400	1423200	2361000	1395900	0.515551	-0.147164	-0.662715	4742
Q8R2U6;P0C028;P0C027	Diphosphoinositol polyphosphate phosphohydrolase 2;Diphosphoinositol polyphosphate phosphohydrolase 3-beta;Diphosphoinositol polyphosphate phosphohydrolase 3-alpha	Nudt4;Nudt11;Nudt10	sp|Q8R2U6|NUDT4_MOUSE Diphosphoinositol polyphosphate phosphohydrolase 2 OS=Mus musculus GN=Nudt4 PE=1 SV=1;sp|P0C028|NUD11_MOUSE Diphosphoinositol polyphosphate phosphohydrolase 3-beta OS=Mus musculus GN=Nudt11 PE=1 SV=1;sp|P0C027|NUD10_MOUSE Diphosphoino	3	4	26.8	20.156	179	0.00027863	6.0375	7126700	1964200	304760	454310	1687000	1467500	0.515293	-0.833884	-1.34918	3316
Q9DCM7	Nucleus accumbens-associated protein 2	Nacc2	sp|Q9DCM7|NACC2_MOUSE Nucleus accumbens-associated protein 2 OS=Mus musculus GN=Nacc2 PE=2 SV=1	1	2	5.3	63.218	586	0.0031292	2.6113	210380	0	0	52661	43845	53713	0.514081	-5.21612	-5.7302	4470
Q6WVG3;Q8C7J6;Q50H33	BTB/POZ domain-containing protein KCTD12	Kctd12	sp|Q6WVG3|KCD12_MOUSE BTB/POZ domain-containing protein KCTD12 OS=Mus musculus GN=Kctd12 PE=1 SV=1	3	7	26.6	35.892	327	0	41.12	9535600	149850	4557400	1190600	1429900	802690	0.513885	-0.740235	-1.25412	2372
Q6NZA9	Transcription initiation factor TFIID subunit 9B	Taf9b	sp|Q6NZA9|TAF9B_MOUSE Transcription initiation factor TFIID subunit 9B OS=Mus musculus GN=Taf9b PE=1 SV=2	1	7	28.5	27.172	249	0.00051216	4.5441	2841900	523770	208940	163340	904200	593310	0.513704	-2.06123	-2.57494	2250
Q8BRC6	Protein MAATS1	Maats1	sp|Q8BRC6|MAAT1_MOUSE Protein MAATS1 OS=Mus musculus GN=Maats1 PE=1 SV=3	1	14	20.7	91.622	783	0	35.582	14004000	2112100	2192400	2352700	4072900	2514300	0.513195	0.639769	0.126574	2806
E9Q8B5		Gm4788	tr|E9Q8B5|E9Q8B5_MOUSE Protein Gm4788 OS=Mus musculus GN=Gm4788 PE=1 SV=1	1	13	17.4	99.437	879	0	37.844	21481000	2532900	2321100	3072100	3700700	3028700	0.512722	0.8115	0.298779	351
P46718	Programmed cell death protein 2	Pdcd2	sp|P46718|PDCD2_MOUSE Programmed cell death protein 2 OS=Mus musculus GN=Pdcd2 PE=2 SV=2	1	3	10.8	38.341	343	0.00050441	4.326	5593700	964130	797260	1146000	1477500	960930	0.512492	-0.656318	-1.16881	1054
Q9CWW7	CXXC-type zinc finger protein 1	Cxxc1	sp|Q9CWW7|CXXC1_MOUSE CXXC-type zinc finger protein 1 OS=Mus musculus GN=Cxxc1 PE=2 SV=1	1	7	12.6	76.166	660	0	6.8818	1979300	366980	246980	277210	582050	408070	0.512212	-2.19869	-2.7109	4008
B7ZNL8		Pus7	tr|B7ZNL8|B7ZNL8_MOUSE Protein Pus7 OS=Mus musculus GN=Pus7 PE=1 SV=1	1	4	7.2	75.39	666	0.00027005	5.4785	1608600	199670	262210	233550	354620	347890	0.510656	-2.59612	-3.10678	183
E9QJZ1;Q9EPV8	Ubiquitin-like protein 5	Gm16381;Ubl5	tr|E9QJZ1|E9QJZ1_MOUSE Protein Gm16381 OS=Mus musculus GN=Gm16381 PE=4 SV=1;sp|Q9EPV8|UBL5_MOUSE Ubiquitin-like protein 5 OS=Mus musculus GN=Ubl5 PE=1 SV=1	2	4	52.1	8.5769	73	0.00027196	5.6044	72464000	6315200	10383000	8233300	20695000	7451200	0.507841	2.54631	2.03847	368
Q78JW9	Ubiquitin domain-containing protein UBFD1	Ubfd1	sp|Q78JW9|UBFD1_MOUSE Ubiquitin domain-containing protein UBFD1 OS=Mus musculus GN=Ubfd1 PE=1 SV=2	1	3	9.2	40.143	368	0	7.3585	7444200	446520	1544000	1473600	2205400	419940	0.506425	-0.740861	-1.24729	2423
Q9D8B3	Charged multivesicular body protein 4b	Chmp4b	sp|Q9D8B3|CHM4B_MOUSE Charged multivesicular body protein 4b OS=Mus musculus GN=Chmp4b PE=1 SV=2	1	5	27.2	24.936	224	0	77.783	49308000	5011600	9934200	7949800	10905000	9645800	0.505688	2.34551	1.83982	4289
P61027	Ras-related protein Rab-10	Rab10	sp|P61027|RAB10_MOUSE Ras-related protein Rab-10 OS=Mus musculus GN=Rab10 PE=1 SV=1	1	10	41.5	22.541	200	0	104.07	211600000	38070000	23767000	34572000	54137000	34612000	0.505636	4.43735	3.93172	1243
Q9Z2U0	Proteasome subunit alpha type-7	Psma7	sp|Q9Z2U0|PSA7_MOUSE Proteasome subunit alpha type-7 OS=Mus musculus GN=Psma7 PE=1 SV=1	1	11	48	27.855	248	0	21.37	52246000	3162100	13789000	8964900	11270000	6780100	0.505452	2.2496	1.74414	4939
Q8BHG1	Nardilysin	Nrd1	sp|Q8BHG1|NRDC_MOUSE Nardilysin OS=Mus musculus GN=Nrdc PE=1 SV=1	1	35	33.8	132.89	1161	0	275.47	44605000	4906200	8406100	7814900	9596700	8392300	0.504869	2.20887	1.704	2694
Q61576	Peptidyl-prolyl cis-trans isomerase FKBP10	Fkbp10	sp|Q61576|FKB10_MOUSE Peptidyl-prolyl cis-trans isomerase FKBP10 OS=Mus musculus GN=Fkbp10 PE=1 SV=2	1	4	8.4	64.697	581	0	9.2392	2043700	383190	143870	340530	353330	255610	0.504781	-2.56475	-3.06954	2041
B2RX88	Centrosome and spindle pole associated protein 1	Cspp1	sp|B2RX88|CSPP1_MOUSE Centrosome and spindle pole associated protein 1 OS=Mus musculus GN=Cspp1 PE=1 SV=2	1	3	3.7	138.31	1205	0	7.0541	3947500	571600	522660	747770	925730	560320	0.504653	-1.34586	-1.85051	173
Q91YN1	Protein FAM118A	Fam118a	sp|Q91YN1|F118A_MOUSE Protein FAM118A OS=Mus musculus GN=Fam118a PE=1 SV=1	1	3	9	40.474	357	0.003139	2.6456	2515700	389280	293260	632010	364810	396810	0.503966	-2.04049	-2.54445	3586
Q9CRY7	Glycerophosphodiester phosphodiesterase domain-containing protein 1	Gdpd1	sp|Q9CRY7|GDPD1_MOUSE Glycerophosphodiester phosphodiesterase domain-containing protein 1 OS=Mus musculus GN=Gdpd1 PE=1 SV=1	1	11	33.4	35.866	314	0	46.579	19545000	3767300	2404800	4061300	4766400	3335200	0.503094	1.1138	0.610703	3974
Q9D5U9	MICAL C-terminal-like protein	Micalcl	sp|Q9D5U9|MICLK_MOUSE MICAL C-terminal-like protein OS=Mus musculus GN=Micalcl PE=1 SV=2	1	8	13.2	75.323	680	0	9.461	5281200	976230	629620	846470	1748000	770510	0.50273	-0.827367	-1.3301	4236
L7MTX3;B1AXU1		1700020N15Rik;Gm6812	tr|L7MTX3|L7MTX3_MOUSE Protein 1700020N15Rik OS=Mus musculus GN=1700020N15Rik PE=4 SV=1;tr|B1AXU1|B1AXU1_MOUSE MCG15151 OS=Mus musculus GN=Gm6812 PE=4 SV=1	2	2	21.4	12.991	112	0.0030939	2.5142	2912700	340680	648790	493360	600750	829080	0.502501	-1.56536	-2.06786	150
P09528	Ferritin heavy chain;Ferritin heavy chain, N-terminally processed	Fth1	sp|P09528|FRIH_MOUSE Ferritin heavy chain OS=Mus musculus GN=Fth1 PE=1 SV=2	1	9	44.5	21.066	182	0	69.726	214440000	12893000	52650000	33654000	45195000	27493000	0.502437	4.22686	3.72442	765
O88844;P54071	Isocitrate dehydrogenase [NADP] cytoplasmic	Idh1	sp|O88844|IDHC_MOUSE Isocitrate dehydrogenase [NADP] cytoplasmic OS=Mus musculus GN=Idh1 PE=1 SV=2	2	22	49	46.674	414	0	151.88	240460000	17605000	47431000	44623000	51111000	24879000	0.499821	4.37364	3.87382	668
P63321	Ras-related protein Ral-A	Rala	sp|P63321|RALA_MOUSE Ras-related protein Ral-A OS=Mus musculus GN=Rala PE=1 SV=1	1	3	19.4	23.553	206	0.00027352	5.6762	7360400	1928900	649280	1413400	1548100	1503900	0.49906	-0.317615	-0.816675	1370
Q4QQM4	Tumor protein p53-inducible protein 11	Trp53i11	sp|Q4QQM4|P5I11_MOUSE Tumor protein p53-inducible protein 11 OS=Mus musculus GN=Trp53i11 PE=1 SV=1	1	2	8.5	20.91	189	0.00051467	4.622	5858400	0	2247100	2335000	1276300	0	0.497328	-1.63417	-2.1315	1837
Q99JX1	Transcription initiation factor TFIID subunit 11	Taf11	sp|Q99JX1|TAF11_MOUSE Transcription initiation factor TFIID subunit 11 OS=Mus musculus GN=Taf11 PE=2 SV=1	1	1	5.7	23.333	211	0.00094809	3.3143	1083800	304200	0	132710	315370	103760	0.496952	-3.50614	-4.0031	3717
Q32KG4	Retrotransposon gag domain-containing protein 1	Rgag1	sp|Q32KG4|RGAG1_MOUSE Retrotransposon gag domain-containing protein 1 OS=Mus musculus GN=Rgag1 PE=2 SV=1	1	1	1.8	138.47	1339	0.0031077	2.5503	1094900	0	0	1094900	0	0	0.49628	-3.93118	-4.42746	1610
Q99K70;Q7TT45	Ras-related GTP-binding protein C;Ras-related GTP-binding protein D	Rragc;Rragd	sp|Q99K70|RRAGC_MOUSE Ras-related GTP-binding protein C OS=Mus musculus GN=Rragc PE=1 SV=1;sp|Q7TT45|RRAGD_MOUSE Ras-related GTP-binding protein D OS=Mus musculus GN=Rragd PE=2 SV=2	2	3	9.3	44.12	398	0	9.2546	2816500	318880	485690	509560	616840	450760	0.494258	-1.83017	-2.32442	2487
Q9D4A5	Uncharacterized protein C16orf86 homolog		sp|Q9D4A5|CP086_MOUSE Uncharacterized protein C16orf86 homolog OS=Mus musculus PE=1 SV=1	1	2	10.4	32.426	307	0.0030648	2.4172	1444800	73881	539800	400270	233210	197660	0.492638	-2.81046	-3.3031	4201
Q8R2Y8	Peptidyl-tRNA hydrolase 2, mitochondrial	Ptrh2	sp|Q8R2Y8|PTH2_MOUSE Peptidyl-tRNA hydrolase 2, mitochondrial OS=Mus musculus GN=Ptrh2 PE=1 SV=1	1	2	19.9	19.526	181	0	19.212	8689500	1313800	1388600	2278800	1389200	1794000	0.490161	-0.0551716	-0.545333	3319
P54923	[Protein ADP-ribosylarginine] hydrolase	Adprh	sp|P54923|ADPRH_MOUSE [Protein ADP-ribosylarginine] hydrolase OS=Mus musculus GN=Adprh PE=1 SV=1	1	12	37.6	40.068	362	0	50.291	49851000	4863800	8719500	8342600	12222000	6236600	0.48967	2.21381	1.72414	1169
Q68ED3	Non-canonical poly(A) RNA polymerase PAPD5	Papd5	sp|Q68ED3|PAPD5_MOUSE Non-canonical poly(A) RNA polymerase PAPD5 OS=Mus musculus GN=Papd5 PE=1 SV=2	1	2	4.7	69.703	633	0	8.1958	761150	105140	121240	128880	183880	139350	0.488027	-3.63783	-4.12586	2168
Q9R0M6	Ras-related protein Rab-9A	Rab9a	sp|Q9R0M6|RAB9A_MOUSE Ras-related protein Rab-9A OS=Mus musculus GN=Rab9a PE=1 SV=1	1	6	39.8	22.909	201	0	30.388	23203000	1814200	5398900	4078800	5344000	3224300	0.48763	1.15461	0.666979	4762
A2AKB9	DDB1- and CUL4-associated factor 10	Dcaf10	sp|A2AKB9|DCA10_MOUSE DDB1- and CUL4-associated factor 10 OS=Mus musculus GN=Dcaf10 PE=1 SV=1	1	2	4.2	61.558	566	0.00094989	3.3352	945560	107270	112470	250480	158870	76342	0.487583	-3.67797	-4.16556	85
Q6NV72	WD repeat and coiled-coil-containing protein C2orf44 homolog		sp|Q6NV72|CB044_MOUSE WD repeat and coiled-coil-containing protein C2orf44 homolog OS=Mus musculus PE=2 SV=2	1	3	5.9	72.268	663	0.00050063	4.1676	469080	0	0	20477	338960	33853	0.487107	-4.90882	-5.39593	2236
P52840	Sulfotransferase 1A1	Sult1a1	sp|P52840|ST1A1_MOUSE Sulfotransferase 1A1 OS=Mus musculus GN=Sult1a1 PE=1 SV=1	1	4	15.8	33.974	291	0	17.59	15829000	2554600	2101400	3250000	2909700	3008500	0.486506	0.71971	0.233204	1142
Q8C634		4922502D21Rik	tr|Q8C634|Q8C634_MOUSE C-type lectin-like receptor 2m OS=Mus musculus GN=4922502D21Rik PE=2 SV=1	1	1	9	22.107	189	0.0095634	1.919	698790	428550	0	0	0	270240	0.486127	-3.85438	-4.34051	2985
Q9WTJ6	Tesmin	Mtl5	sp|Q9WTJ6|MTL5_MOUSE Tesmin OS=Mus musculus GN=Mtl5 PE=1 SV=2	1	3	9.1	50.616	475	0.0002742	5.722	4995000	917290	581730	764560	1816900	636380	0.482391	-0.949694	-1.43209	4796
Q9D4H8	Cullin-2	Cul2	sp|Q9D4H8|CUL2_MOUSE Cullin-2 OS=Mus musculus GN=Cul2 PE=1 SV=2	1	18	25.2	86.876	745	0	46.352	16867000	2363600	2289500	2809100	3559000	2854000	0.482126	0.721114	0.238988	4209
Q8C624	Spermatogenesis-associated protein 33	Spata33	sp|Q8C624|SPT33_MOUSE Spermatogenesis-associated protein 33 OS=Mus musculus GN=Spata33 PE=1 SV=1	1	4	39.4	15.037	132	0	51.357	43888000	4679400	8213800	5433900	14333000	6931600	0.481908	2.13507	1.65317	2982
P35278	Ras-related protein Rab-5C	Rab5c	sp|P35278|RAB5C_MOUSE Ras-related protein Rab-5C OS=Mus musculus GN=Rab5c PE=1 SV=2	1	7	38.9	23.412	216	0	89.237	112590000	10733000	24552000	15457000	39444000	15750000	0.477472	3.51933	3.04185	987
Q8BH97	Reticulocalbin-3	Rcn3	sp|Q8BH97|RCN3_MOUSE Reticulocalbin-3 OS=Mus musculus GN=Rcn3 PE=1 SV=1	1	3	11.6	38.001	328	0.00050697	4.3985	2560500	282560	450400	200250	794080	639180	0.476167	-1.9899	-2.46607	2686
P54729	NEDD8 ultimate buster 1	Nub1	sp|P54729|NUB1_MOUSE NEDD8 ultimate buster 1 OS=Mus musculus GN=Nub1 PE=1 SV=2	1	19	31.4	70.306	614	0	72.313	41509000	5853000	6085100	6273100	9864900	7668500	0.47486	2.07307	1.59821	1162
G3X8U3		2210016F16Rik	tr|G3X8U3|G3X8U3_MOUSE MCG6895 OS=Mus musculus GN=2210016F16Rik PE=1 SV=1	1	2	5.9	38.615	338	0.0027131	2.7282	381220	0	0	120060	231150	30005	0.474278	-4.30038	-4.77466	403
O55222	Integrin-linked protein kinase	Ilk	sp|O55222|ILK_MOUSE Integrin-linked protein kinase OS=Mus musculus GN=Ilk PE=1 SV=2	1	11	28.3	51.373	452	0	22.492	18918000	2715100	2844900	3756700	3970300	3205900	0.473735	0.969406	0.495671	587
Q8R349	Cell division cycle protein 16 homolog	Cdc16	sp|Q8R349|CDC16_MOUSE Cell division cycle protein 16 homolog OS=Mus musculus GN=Cdc16 PE=1 SV=1	1	4	6	71.459	620	0.0027236	2.7579	3723900	467060	607590	536340	869750	721230	0.47333	-1.41427	-1.8876	3328
Q8BG81	Polymerase delta-interacting protein 3	Poldip3	sp|Q8BG81|PDIP3_MOUSE Polymerase delta-interacting protein 3 OS=Mus musculus GN=Poldip3 PE=1 SV=1	1	14	43.6	46.132	420	0	185.99	44370000	4343900	9723000	8110200	14406000	5207700	0.471411	2.19259	1.72118	2649
Q9D1J3	SAP domain-containing ribonucleoprotein	Sarnp	sp|Q9D1J3|SARNP_MOUSE SAP domain-containing ribonucleoprotein OS=Mus musculus GN=Sarnp PE=1 SV=3	1	8	39	23.532	210	0	134.74	251290000	14335000	86090000	44517000	49205000	43828000	0.470923	4.62652	4.1556	4139
Q641K1	Cytosolic carboxypeptidase 1	Agtpbp1	sp|Q641K1|CBPC1_MOUSE Cytosolic carboxypeptidase 1 OS=Mus musculus GN=Agtpbp1 PE=1 SV=2	1	2	1.8	137.2	1218	0.0031146	2.5701	323490	54499	41586	81392	88026	33346	0.470893	-4.90082	-5.37171	2137
Q8CG50;P35294	Ras-related protein Rab-43	Rab43	sp|Q8CG50|RAB43_MOUSE Ras-related protein Rab-43 OS=Mus musculus GN=Rab43 PE=1 SV=1	2	5	24.3	23.263	210	0	52.733	8931700	1478500	1045700	1338900	2316100	1370000	0.469952	-0.194767	-0.664719	3073
Q9D2N9	Vacuolar protein sorting-associated protein 33A	Vps33a	sp|Q9D2N9|VP33A_MOUSE Vacuolar protein sorting-associated protein 33A OS=Mus musculus GN=Vps33a PE=1 SV=2	1	5	8.9	67.554	598	0.00071514	3.3885	1430600	316330	136980	235760	298300	282060	0.467611	-2.77564	-3.24325	4166
Q8C0J6	Ankyrin repeat domain-containing protein SOWAHC	Sowahc	sp|Q8C0J6|SWAHC_MOUSE Ankyrin repeat domain-containing protein SOWAHC OS=Mus musculus GN=Sowahc PE=1 SV=2	1	2	5.3	54.937	512	0.0031439	2.6582	609230	231310	0	0	306990	70932	0.467334	-4.16847	-4.6358	2918
D3YXG1		BC089491	tr|D3YXG1|D3YXG1_MOUSE Protein BC089491 OS=Mus musculus GN=BC089491 PE=4 SV=2	1	2	8.4	35.154	332	0	8.5108	6900600	838500	1353400	1397500	1694600	1121800	0.467247	-0.420538	-0.887785	245
Q8R2R1	Protein O-mannosyl-transferase 1	Pomt1	sp|Q8R2R1|POMT1_MOUSE Protein O-mannosyl-transferase 1 OS=Mus musculus GN=Pomt1 PE=1 SV=1	1	3	5.2	85.233	746	0.0031008	2.5307	1375800	371760	114100	275650	278260	250160	0.466985	-2.79163	-3.25861	3313
P01872	Ig mu chain C region	Ighm	sp|P01872|IGHM_MOUSE Ig mu chain C region OS=Mus musculus GN=Ighm PE=1 SV=2	1	16	39.4	49.971	454	0	120.68	96832000	8004200	13086000	12729000	16659000	11046000	0.464501	2.84084	2.37633	715
Q810N3		BC049730	tr|Q810N3|Q810N3_MOUSE Protein BC049730 OS=Mus musculus GN=BC049730 PE=1 SV=1	1	5	13.8	26.553	246	0	19.45	38711000	7628300	4637800	7606900	6660000	9072400	0.464317	2.0577	1.59338	2624
Q80W37	Snurportin-1	Snupn	sp|Q80W37|SPN1_MOUSE Snurportin-1 OS=Mus musculus GN=Snupn PE=2 SV=1	1	3	7.8	41.032	358	0.0087848	1.958	1216400	197820	126140	195470	148240	296320	0.463019	-3.17832	-3.64134	2550
Q9QXY9	Peroxisomal biogenesis factor 3	Pex3	sp|Q9QXY9|PEX3_MOUSE Peroxisomal biogenesis factor 3 OS=Mus musculus GN=Pex3 PE=1 SV=1	1	4	12.9	42.223	372	0	8.0753	2844000	673520	323230	656510	519730	647830	0.462537	-1.61627	-2.07881	4696
Q8CEE6	PAS domain-containing serine/threonine-protein kinase	Pask	sp|Q8CEE6|PASK_MOUSE PAS domain-containing serine/threonine-protein kinase OS=Mus musculus GN=Pask PE=1 SV=3	1	27	23.5	151.25	1383	0	141.74	22686000	2985300	3314300	4240700	4894700	3259400	0.462033	1.1363	0.67427	3056
Q91WF7	Polyphosphoinositide phosphatase	Fig4	sp|Q91WF7|FIG4_MOUSE Polyphosphoinositide phosphatase OS=Mus musculus GN=Fig4 PE=1 SV=1	1	1	1.4	103.45	907	0.004722	2.2061	160810	46310	45072	34381	35047	0	0.460784	-4.97032	-5.4311	3537
Q8WTY4	Anamorsin	Ciapin1	sp|Q8WTY4|CPIN1_MOUSE Anamorsin OS=Mus musculus GN=Ciapin1 PE=1 SV=1	1	9	42.4	33.429	309	0	99.435	42608000	3367800	9366000	6662400	10965000	5253500	0.460378	1.97098	1.5106	3484
Q9EQH2	Endoplasmic reticulum aminopeptidase 1	Erap1	sp|Q9EQH2|ERAP1_MOUSE Endoplasmic reticulum aminopeptidase 1 OS=Mus musculus GN=Erap1 PE=1 SV=2	1	1	1.4	106.6	930	0.00093743	3.1648	159520	20245	23276	24837	29484	30202	0.459432	-6.04524	-6.50467	4502
Q3TYA6	M-phase phosphoprotein 8	Mphosph8	sp|Q3TYA6|MPP8_MOUSE M-phase phosphoprotein 8 OS=Mus musculus GN=Mphosph8 PE=1 SV=1	1	8	10.3	97.466	858	0	7.6633	3923200	405430	801800	600210	849870	785280	0.459238	-1.33036	-1.7896	1669
Q8K304	E3 ubiquitin-protein ligase TM129	Tmem129	sp|Q8K304|TM129_MOUSE E3 ubiquitin-protein ligase TM129 OS=Mus musculus GN=Tmem129 PE=2 SV=1	1	2	6.1	40.627	362	0.0027273	2.7677	1945300	495100	205430	352670	461280	430840	0.459135	-2.16863	-2.62777	3222
Q9D1P2	Histone acetyltransferase KAT8	Kat8	sp|Q9D1P2|KAT8_MOUSE Histone acetyltransferase KAT8 OS=Mus musculus GN=Kat8 PE=1 SV=1	1	2	6.1	52.573	458	0.0031369	2.64	504450	0	150100	108710	72455	173190	0.457472	-4.063	-4.52047	4145
Q61503	5-nucleotidase	Nt5e	sp|Q61503|5NTD_MOUSE 5-nucleotidase OS=Mus musculus GN=Nt5e PE=1 SV=2	1	5	11.8	63.864	576	0	6.8881	1544000	311610	144120	162580	330790	380640	0.456938	-2.7605	-3.21744	2035
Q99LC8	Translation initiation factor eIF-2B subunit alpha	Eif2b1	sp|Q99LC8|EI2BA_MOUSE Translation initiation factor eIF-2B subunit alpha OS=Mus musculus GN=Eif2b1 PE=1 SV=1	1	5	18.4	33.816	305	0	7.1264	6141700	1435200	561440	685310	1766400	1284300	0.456593	-0.6782	-1.13479	3762
P14576	Signal recognition particle 54 kDa protein	Srp54	sp|P14576|SRP54_MOUSE Signal recognition particle 54 kDa protein OS=Mus musculus GN=Srp54 PE=1 SV=2	1	16	33.1	55.72	504	0	102.46	36823000	4660400	5812900	7502700	7735400	5211500	0.455619	1.85645	1.40084	820
Q61166	Microtubule-associated protein RP/EB family member 1	Mapre1	sp|Q61166|MARE1_MOUSE Microtubule-associated protein RP/EB family member 1 OS=Mus musculus GN=Mapre1 PE=1 SV=3	1	11	44	30.016	268	0	63.711	92258000	8164000	19978000	15428000	23992000	12062000	0.455258	3.15105	2.69579	2002
Q8BY87	Ubiquitin carboxyl-terminal hydrolase 47	Usp47	sp|Q8BY87|UBP47_MOUSE Ubiquitin carboxyl-terminal hydrolase 47 OS=Mus musculus GN=Usp47 PE=1 SV=2	1	33	28.5	157.45	1376	0	159.69	16797000	1808700	2664400	2926900	3492200	2212100	0.453873	0.609234	0.155361	2887
B2RPU8;Q9D1L0	Coiled-coil-helix-coiled-coil-helix domain-containing protein 2	Zbed5;Chchd2	tr|B2RPU8|B2RPU8_MOUSE MCG130675 OS=Mus musculus GN=Zbed5 PE=2 SV=1;sp|Q9D1L0|CHCH2_MOUSE Coiled-coil-helix-coiled-coil-helix domain-containing protein 2 OS=Mus musculus GN=Chchd2 PE=2 SV=1	2	1	3.2	84.266	756	0.0013993	3.0949	2870600	254440	704780	420570	852430	452320	0.453454	-1.76525	-2.2187	157
Q60949	TBC1 domain family member 1	Tbc1d1	sp|Q60949|TBCD1_MOUSE TBC1 domain family member 1 OS=Mus musculus GN=Tbc1d1 PE=1 SV=3	1	29	26.3	142.02	1255	0	118.63	27386000	5621800	3222100	5083500	6867000	4687100	0.450497	1.56099	1.1105	1979
Q9CPY6	Glucose-induced degradation protein 4 homolog	Gid4	sp|Q9CPY6|GID4_MOUSE Glucose-induced degradation protein 4 homolog OS=Mus musculus GN=Gid4 PE=1 SV=1	1	5	19.8	24.863	217	0	7.5084	7802600	519750	2062800	885030	1922200	1384600	0.450374	-0.478399	-0.928773	3856
Q99L48	60S ribosomal export protein NMD3	Nmd3	sp|Q99L48|NMD3_MOUSE 60S ribosomal export protein NMD3 OS=Mus musculus GN=Nmd3 PE=1 SV=1	1	16	32.2	57.611	503	0	112.08	47347000	8714800	6304500	10812000	10321000	7728300	0.44943	2.36033	1.9109	3758
P47754	F-actin-capping protein subunit alpha-2	Capza2	sp|P47754|CAZA2_MOUSE F-actin-capping protein subunit alpha-2 OS=Mus musculus GN=Capza2 PE=1 SV=3	1	10	47.2	32.967	286	0	236.93	97726000	13189000	16224000	17757000	23830000	15637000	0.448591	3.34023	2.89164	1064
Q61696;P17879	Heat shock 70 kDa protein 1A;Heat shock 70 kDa protein 1B	Hspa1a;Hspa1b	sp|Q61696|HS71A_MOUSE Heat shock 70 kDa protein 1A OS=Mus musculus GN=Hspa1a PE=1 SV=2;sp|P17879|HS71B_MOUSE Heat shock 70 kDa protein 1B OS=Mus musculus GN=Hspa1b PE=1 SV=3	2	26	44.5	70.078	641	0	74.49	13083000	1771500	1899000	1599500	3272300	2491500	0.448488	0.344573	-0.103915	855
Q80Y81	Zinc phosphodiesterase ELAC protein 2	Elac2	sp|Q80Y81|RNZ2_MOUSE Zinc phosphodiesterase ELAC protein 2 OS=Mus musculus GN=Elac2 PE=1 SV=1	1	4	6.5	92.718	831	0.00028019	6.16	576890	73122	67925	75590	159770	61099	0.447245	-4.35851	-4.80575	2590
P57746	V-type proton ATPase subunit D	Atp6v1d	sp|P57746|VATD_MOUSE V-type proton ATPase subunit D OS=Mus musculus GN=Atp6v1d PE=1 SV=1	1	6	23.1	28.369	247	0	31.856	20133000	2823200	3252500	4472000	3782300	3447500	0.444418	1.06484	0.62042	1194
P97434	Myosin phosphatase Rho-interacting protein	Mprip	sp|P97434|MPRIP_MOUSE Myosin phosphatase Rho-interacting protein OS=Mus musculus GN=Mprip PE=1 SV=2	1	45	46	116.41	1024	0	246.96	52220000	10020000	5874000	9323500	9020100	11252000	0.44441	2.40497	1.96056	1470
Q7TMM9	Tubulin beta-2A chain	Tubb2a	sp|Q7TMM9|TBB2A_MOUSE Tubulin beta-2A chain OS=Mus musculus GN=Tubb2a PE=1 SV=1	1	23	56.4	49.906	445	0	38.115	254240000	22229000	56565000	35009000	56431000	46984000	0.441231	4.61032	4.16908	2444
Q9CWW6	Peptidyl-prolyl cis-trans isomerase NIMA-interacting 4	Pin4	sp|Q9CWW6|PIN4_MOUSE Peptidyl-prolyl cis-trans isomerase NIMA-interacting 4 OS=Mus musculus GN=Pin4 PE=1 SV=1	1	1	9.2	13.815	131	0	23.709	6479900	443560	1651000	602730	1727500	1252400	0.440997	-0.762752	-1.20375	4007
Q6YND2	Zinc finger protein 653	Znf653	sp|Q6YND2|ZN653_MOUSE Zinc finger protein 653 OS=Mus musculus GN=Znf653 PE=2 SV=2	1	2	3.9	67.516	615	0.008977	1.9451	383330	0	0	119810	43502	126700	0.437131	-4.4119	-4.84903	2378
Q9D593	V-type proton ATPase subunit E 2	Atp6v1e2	sp|Q9D593|VATE2_MOUSE V-type proton ATPase subunit E 2 OS=Mus musculus GN=Atp6v1e2 PE=1 SV=1	1	8	33.2	26.306	226	0	12.434	19161000	2420500	3039400	3255200	5184300	2433500	0.435711	0.896235	0.460525	4227
B2RWS6	Histone acetyltransferase p300	Ep300	sp|B2RWS6|EP300_MOUSE Histone acetyltransferase p300 OS=Mus musculus GN=Ep300 PE=1 SV=2	1	7	3.2	263.3	2412	0	7.0959	1374100	228710	189840	260260	369150	192580	0.432667	-2.80913	-3.2418	171
Q9D8V0	Minor histocompatibility antigen H13	Hm13	sp|Q9D8V0|HM13_MOUSE Minor histocompatibility antigen H13 OS=Mus musculus GN=Hm13 PE=1 SV=1	1	2	5.6	41.747	378	0.00050264	4.2659	5512800	1300500	483160	809660	1237000	1014800	0.431604	-0.882597	-1.3142	4305
Q8R1M0	Embryonic stem cell-specific 5-hydroxymethylcytosine-binding protein	Hmces	sp|Q8R1M0|HMCES_MOUSE Embryonic stem cell-specific 5-hydroxymethylcytosine-binding protein OS=Mus musculus GN=Hmces PE=1 SV=1	1	2	9.3	40.168	353	0	8.3748	1688200	157800	398300	279150	331640	347040	0.431223	-2.54375	-2.97497	3301
Q9D7G4	Protein EURL homolog	Eurl	sp|Q9D7G4|EURL_MOUSE Protein EURL homolog OS=Mus musculus GN=Eurl PE=2 SV=1	1	3	16.2	32.883	290	0	7.1245	1909100	429090	240330	368300	521100	350330	0.429185	-2.18862	-2.6178	4265
Q9CWM4	Prefoldin subunit 1	Pfdn1	sp|Q9CWM4|PFD1_MOUSE Prefoldin subunit 1 OS=Mus musculus GN=Pfdn1 PE=1 SV=1	1	3	25.4	14.254	122	0	10.922	11300000	495870	3491000	1098500	1868500	2248100	0.42815	-0.155033	-0.583183	3998
Q9JHK4	Geranylgeranyl transferase type-2 subunit alpha	Rabggta	sp|Q9JHK4|PGTA_MOUSE Geranylgeranyl transferase type-2 subunit alpha OS=Mus musculus GN=Rabggta PE=1 SV=1	1	3	5.3	64.989	567	0.0030769	2.4441	320890	76171	0	28646	107440	61247	0.427911	-5.01479	-5.4427	4563
Q9QXP4	Protein downstream neighbor of Son	Donson	sp|Q9QXP4|DONS_MOUSE Protein downstream neighbor of Son OS=Mus musculus GN=Donson PE=1 SV=2	1	4	8.6	61.987	560	0	7.0017	1507400	151990	293760	211470	329790	273860	0.427786	-2.79386	-3.22164	4690
Q5DU37	Zinc finger FYVE domain-containing protein 26	Zfyve26	sp|Q5DU37|ZFY26_MOUSE Zinc finger FYVE domain-containing protein 26 OS=Mus musculus GN=Zfyve26 PE=1 SV=2	1	7	3.4	282.96	2529	0	8.0218	481140	78237	66010	101400	94899	77764	0.425839	-4.35177	-4.77761	1870
B1AZI6	THO complex subunit 2	Thoc2	sp|B1AZI6|THOC2_MOUSE THO complex subunit 2 OS=Mus musculus GN=Thoc2 PE=1 SV=1	1	10	6.8	182.77	1594	0.00027778	5.966	650730	57964	164210	107820	197960	87635	0.425366	-3.9112	-4.33656	154
Q60739	BAG family molecular chaperone regulator 1	Bag1	sp|Q60739|BAG1_MOUSE BAG family molecular chaperone regulator 1 OS=Mus musculus GN=Bag1 PE=1 SV=3	1	7	22	39.74	355	0	29.458	29671000	2306200	8161600	5105100	7601300	4234600	0.424899	1.56306	1.13816	1958
Q8CBY8	Dynactin subunit 4	Dctn4	sp|Q8CBY8|DCTN4_MOUSE Dynactin subunit 4 OS=Mus musculus GN=Dctn4 PE=1 SV=1	1	9	21.8	53.056	467	0	22.582	20763000	3276700	2761800	3467300	3436200	4581900	0.423212	1.03312	0.609905	3024
P26516	26S proteasome non-ATPase regulatory subunit 7	Psmd7	sp|P26516|PSMD7_MOUSE 26S proteasome non-ATPase regulatory subunit 7 OS=Mus musculus GN=Psmd7 PE=1 SV=2	1	13	47.7	36.539	321	0	323.31	138620000	21386000	19350000	24572000	30367000	22435000	0.419204	3.78661	3.36741	923
Q8BH66	Atlastin-1	Atl1	sp|Q8BH66|ATLA1_MOUSE Atlastin-1 OS=Mus musculus GN=Atl1 PE=1 SV=1	1	9	15.6	63.377	558	0	25.627	10109000	2077700	1178900	2051100	1950800	1905000	0.41915	0.0863434	-0.332807	2681
Q6NZB0	DnaJ homolog subfamily C member 8	Dnajc8	sp|Q6NZB0|DNJC8_MOUSE DnaJ homolog subfamily C member 8 OS=Mus musculus GN=Dnajc8 PE=1 SV=2	1	8	24.5	29.812	253	0	21.293	39298000	1459800	15027000	5780400	7863900	4481000	0.41773	1.66634	1.24861	2251
Q8K2C9	Very-long-chain (3R)-3-hydroxyacyl-CoA dehydratase 3	Hacd3	sp|Q8K2C9|HACD3_MOUSE Very-long-chain (3R)-3-hydroxyacyl-CoA dehydratase 3 OS=Mus musculus GN=Hacd3 PE=1 SV=2	1	9	26.5	43.131	362	0	16.285	28255000	5145000	3766200	7984300	3944000	5363300	0.417121	1.57624	1.15912	3202
Q9Z1K5	E3 ubiquitin-protein ligase ARIH1	Arih1	sp|Q9Z1K5|ARI1_MOUSE E3 ubiquitin-protein ligase ARIH1 OS=Mus musculus GN=Arih1 PE=1 SV=3	1	7	12.1	64.016	555	0	40.833	14734000	2118200	2174900	2507200	3421400	2281300	0.416893	0.539767	0.122873	4900
O08901	Mitotic checkpoint serine/threonine-protein kinase BUB1	Bub1	sp|O08901|BUB1_MOUSE Mitotic checkpoint serine/threonine-protein kinase BUB1 OS=Mus musculus GN=Bub1 PE=1 SV=1	1	12	13.4	119.56	1058	0	50.205	8528800	1194900	1151000	1316800	1622100	1492700	0.416332	-0.3328	-0.749131	464
F8VQ03		Adam3	tr|F8VQ03|F8VQ03_MOUSE Protein Adam3 OS=Mus musculus GN=Adam3 PE=4 SV=1	1	8	11.1	91.443	822	0	22.907	4911200	1346300	440130	1299700	953000	727230	0.415849	-0.940671	-1.35652	391
O88351	Inhibitor of nuclear factor kappa-B kinase subunit beta	Ikbkb	sp|O88351|IKKB_MOUSE Inhibitor of nuclear factor kappa-B kinase subunit beta OS=Mus musculus GN=Ikbkb PE=1 SV=1	1	1	1.5	86.689	757	0.0082036	1.9955	192470	31837	33696	40603	55868	30467	0.413924	-5.49731	-5.91124	631
Q91VZ6	Stromal membrane-associated protein 1	Smap1	sp|Q91VZ6|SMAP1_MOUSE Stromal membrane-associated protein 1 OS=Mus musculus GN=Smap1 PE=1 SV=1	1	4	10.9	47.66	440	0.00026889	5.3897	5681200	809760	916320	1058100	1177300	1008500	0.413591	-0.780684	-1.19428	3515
Q9CW79	Golgin subfamily A member 1	Golga1	sp|Q9CW79|GOGA1_MOUSE Golgin subfamily A member 1 OS=Mus musculus GN=Golga1 PE=1 SV=2	1	15	23.1	87.337	758	0	72.167	9598800	1564900	1577900	1452500	1903300	2756700	0.413236	0.0862532	-0.326982	3987
Q64521	Glycerol-3-phosphate dehydrogenase, mitochondrial	Gpd2	sp|Q64521|GPDM_MOUSE Glycerol-3-phosphate dehydrogenase, mitochondrial OS=Mus musculus GN=Gpd2 PE=1 SV=2	1	8	12.8	80.953	727	0	8.7326	1317200	362580	105130	150540	323780	299880	0.413225	-2.92249	-3.33571	2154
Q04735;Q8K0D0;Q04899	Cyclin-dependent kinase 16	Cdk16	sp|Q04735|CDK16_MOUSE Cyclin-dependent kinase 16 OS=Mus musculus GN=Cdk16 PE=1 SV=1	3	14	30.8	55.913	496	0	18.305	10549000	2405000	1006900	1371800	2838700	1888400	0.410123	0.0690807	-0.341043	1539
Q8R010	Aminoacyl tRNA synthase complex-interacting multifunctional protein 2	Aimp2	sp|Q8R010|AIMP2_MOUSE Aminoacyl tRNA synthase complex-interacting multifunctional protein 2 OS=Mus musculus GN=Aimp2 PE=1 SV=2	1	4	20.6	35.377	320	0	10.073	12282000	2009800	1425800	2120000	2043500	2180100	0.409035	0.189426	-0.219609	3270
Q8VEM8	Phosphate carrier protein, mitochondrial	Slc25a3	sp|Q8VEM8|MPCP_MOUSE Phosphate carrier protein, mitochondrial OS=Mus musculus GN=Slc25a3 PE=1 SV=1	1	2	6.2	39.632	357	0.00072551	3.6171	2351300	379140	376100	305270	645520	531860	0.408887	-1.97514	-2.38402	3463
Q8K3B1	F-box/SPRY domain-containing protein 1	Fbxo45	sp|Q8K3B1|FBSP1_MOUSE F-box/SPRY domain-containing protein 1 OS=Mus musculus GN=Fbxo45 PE=1 SV=2	1	2	6.6	30.604	286	0.00028193	6.3124	2456800	200870	591080	218520	729360	499480	0.408746	-2.10739	-2.51614	3236
Q9DAN1	Protein disulfide-isomerase-like protein of the testis	Pdilt	sp|Q9DAN1|PDILT_MOUSE Protein disulfide-isomerase-like protein of the testis OS=Mus musculus GN=Pdilt PE=1 SV=2	1	21	31.5	67.758	588	0	87.995	47273000	8247200	6263400	9648800	8421500	8886100	0.408513	2.27492	1.8664	4386
Q3TDK6	Protein rogdi homolog	Rogdi	sp|Q3TDK6|ROGDI_MOUSE Protein rogdi homolog OS=Mus musculus GN=Rogdi PE=1 SV=2	1	7	32.8	32.1	287	0	13.602	12979000	2570600	1535100	1976100	3324700	2317900	0.40796	0.419159	0.011199	1627
A3KG45;A2BG94		Gm6880	tr|A3KG45|A3KG45_MOUSE MCG1035527 (Fragment) OS=Mus musculus GN=Gm6880 PE=1 SV=1	2	4	18.3	21.802	208	0.0002656	5.1951	9214300	965500	2165500	1967000	1669200	1788000	0.407756	-0.0392408	-0.446997	117
Q3TIU4	2,5-phosphodiesterase 12	Pde12	sp|Q3TIU4|PDE12_MOUSE 2,5-phosphodiesterase 12 OS=Mus musculus GN=Pde12 PE=1 SV=2	1	8	21.5	67.513	608	0	15.199	5159300	732300	576090	641460	1367400	606510	0.407667	-1.19392	-1.60158	1639
Q8K0C4	Lanosterol 14-alpha demethylase	Cyp51a1	sp|Q8K0C4|CP51A_MOUSE Lanosterol 14-alpha demethylase OS=Mus musculus GN=Cyp51a1 PE=1 SV=1	1	7	14.1	56.775	503	0	25.755	6472900	1366100	766910	1316300	1291400	1222700	0.406848	-0.538576	-0.945424	3161
Q08189	Protein-glutamine gamma-glutamyltransferase E;Protein-glutamine gamma-glutamyltransferase E 50 kDa catalytic chain;Protein-glutamine gamma-glutamyltransferase E 27 kDa non-catalytic chain	Tgm3	sp|Q08189|TGM3_MOUSE Protein-glutamine gamma-glutamyltransferase E OS=Mus musculus GN=Tgm3 PE=1 SV=2	1	1	1.9	77.308	693	0.0031097	2.5536	675810	93196	0	0	279140	66449	0.40672	-4.56716	-4.97388	1566
Q3UZ57	Axonemal dynein light chain domain-containing protein 1	Axdnd1	sp|Q3UZ57|AXDN1_MOUSE Axonemal dynein light chain domain-containing protein 1 OS=Mus musculus GN=Axdnd1 PE=1 SV=1	1	6	14.6	49.806	424	0	7.0407	5785300	969110	838640	1060800	1246500	1071000	0.405516	-0.723076	-1.12859	1796
P54818	Galactocerebrosidase	Galc	sp|P54818|GALC_MOUSE Galactocerebrosidase OS=Mus musculus GN=Galc PE=1 SV=2	1	4	8	77.256	684	0.00027824	6.0161	1101700	244640	120120	180030	211100	256070	0.405279	-3.1181	-3.52338	1165
P09242	Alkaline phosphatase, tissue-nonspecific isozyme	Alpl	sp|P09242|PPBT_MOUSE Alkaline phosphatase, tissue-nonspecific isozyme OS=Mus musculus GN=Alpl PE=1 SV=2	1	5	10.9	57.514	524	0	8.1076	3735800	871360	376990	605320	809560	742200	0.405263	-1.37679	-1.78205	761
O54950	5-AMP-activated protein kinase subunit gamma-1	Prkag1	sp|O54950|AAKG1_MOUSE 5-AMP-activated protein kinase subunit gamma-1 OS=Mus musculus GN=Prkag1 PE=1 SV=2	1	4	11.5	37.52	330	0.00093765	3.1653	1904000	415280	194850	332490	410540	324700	0.403703	-2.38902	-2.79272	562
Q8R550	SH3 domain-containing kinase-binding protein 1	Sh3kbp1	sp|Q8R550|SH3K1_MOUSE SH3 domain-containing kinase-binding protein 1 OS=Mus musculus GN=Sh3kbp1 PE=1 SV=1	1	7	15.5	78.169	709	0	21.134	7215000	1228300	1103800	1491500	1845700	1101200	0.402379	-0.357071	-0.75945	3360
P62715;P63330	Serine/threonine-protein phosphatase 2A catalytic subunit beta isoform;Serine/threonine-protein phosphatase 2A catalytic subunit alpha isoform	Ppp2cb;Ppp2ca	sp|P62715|PP2AB_MOUSE Serine/threonine-protein phosphatase 2A catalytic subunit beta isoform OS=Mus musculus GN=Ppp2cb PE=1 SV=1;sp|P63330|PP2AA_MOUSE Serine/threonine-protein phosphatase 2A catalytic subunit alpha isoform OS=Mus musculus GN=Ppp2ca PE=1 SV	2	8	32.4	35.575	309	0	133.69	48287000	4342600	9184100	5310300	10748000	8472900	0.402314	2.08214	1.67983	1310
Q99L20		Gstt3	tr|Q99L20|Q99L20_MOUSE Glutathione S-transferase theta 3 OS=Mus musculus GN=Gstt3 PE=1 SV=1	1	7	29.9	27.403	241	0	91.081	57913000	7953300	10334000	10504000	14138000	9628200	0.402053	2.60347	2.20142	3754
Q8BGC0	HIV Tat-specific factor 1 homolog	Htatsf1	sp|Q8BGC0|HTSF1_MOUSE HIV Tat-specific factor 1 homolog OS=Mus musculus GN=Htatsf1 PE=1 SV=1	1	9	14.7	86.239	757	0	9.3094	3662600	537960	566180	523100	759440	811230	0.401611	-1.43496	-1.83657	2654
E9Q4Y4		Cep192	tr|E9Q4Y4|E9Q4Y4_MOUSE Protein Cep192 OS=Mus musculus GN=Cep192 PE=1 SV=1	1	2	0.5	276.34	2514	0.0039012	2.295	9215200	1218500	1614300	1964500	1953400	1378000	0.401515	-0.0894988	-0.491014	325
Q80UP5;Q6PD24	Ankyrin repeat domain-containing protein 13A	Ankrd13a	sp|Q80UP5|AN13A_MOUSE Ankyrin repeat domain-containing protein 13A OS=Mus musculus GN=Ankrd13a PE=1 SV=2	2	12	23.1	67.177	588	0	24.563	6219900	1645500	503970	936730	1379900	1119700	0.401439	-0.712614	-1.11405	2523
Q8BTW9	Serine/threonine-protein kinase PAK 4	Pak4	sp|Q8BTW9|PAK4_MOUSE Serine/threonine-protein kinase PAK 4 OS=Mus musculus GN=Pak4 PE=1 SV=1	1	2	5.6	64.622	593	0.0049324	2.2017	751290	45246	269260	217250	94944	124590	0.400079	-3.75844	-4.15852	2826
Q9ERE3;Q9QZS5	Serine/threonine-protein kinase Sgk3	Sgk3	sp|Q9ERE3|SGK3_MOUSE Serine/threonine-protein kinase Sgk3 OS=Mus musculus GN=Sgk3 PE=1 SV=1	2	4	8.5	57.145	496	0.000516	4.6543	2635400	718440	197460	396270	357040	719160	0.39836	-1.98937	-2.38773	4521
Q9D9G7		1700074P13Rik	tr|Q9D9G7|Q9D9G7_MOUSE 1700074P13Rik protein OS=Mus musculus GN=1700074P13Rik PE=2 SV=1	1	5	19.1	28.406	251	0	6.702	19418000	3104100	2769300	4239600	3516600	3213100	0.397456	0.970284	0.572828	4327
Q9JK23	Proteasome assembly chaperone 1	Psmg1	sp|Q9JK23|PSMG1_MOUSE Proteasome assembly chaperone 1 OS=Mus musculus GN=Psmg1 PE=1 SV=1	1	6	20.4	33.104	289	0	52.999	26432000	3951700	3847600	5007200	6117800	3677400	0.397298	1.38149	0.984196	4615
Q3U0V2	Tumor necrosis factor receptor type 1-associated DEATH domain protein	Tradd	sp|Q3U0V2|TRADD_MOUSE Tumor necrosis factor receptor type 1-associated DEATH domain protein OS=Mus musculus GN=Tradd PE=1 SV=1	1	2	8.7	34.577	310	0.0013996	3.0966	2922000	627260	322070	577350	591530	504040	0.396206	-1.73652	-2.13273	1678
O54984	ATPase Asna1	Asna1	sp|O54984|ASNA_MOUSE ATPase Asna1 OS=Mus musculus GN=Asna1 PE=1 SV=2	1	9	30.2	38.822	348	0	23.632	46634000	10132000	4989000	9552100	6225100	11414000	0.394364	2.24514	1.85078	564
Q5SNZ0	Girdin	Ccdc88a	sp|Q5SNZ0|GRDN_MOUSE Girdin OS=Mus musculus GN=Ccdc88a PE=1 SV=2	1	44	24	215.92	1873	0	160.28	13802000	1968100	2309400	2534500	3380300	2132700	0.393631	0.506771	0.11314	1899
P49443	Protein phosphatase 1A	Ppm1a	sp|P49443|PPM1A_MOUSE Protein phosphatase 1A OS=Mus musculus GN=Ppm1a PE=1 SV=1	1	3	10.5	42.432	382	0.00049975	4.1404	4183800	448120	683460	776950	792210	516590	0.391151	-1.44143	-1.83258	1099
P59672	Ankyrin repeat and SAM domain-containing protein 1A	Anks1a	sp|P59672|ANS1A_MOUSE Ankyrin repeat and SAM domain-containing protein 1A OS=Mus musculus GN=Anks1a PE=1 SV=3	1	9	11.1	125.24	1150	0	7.1692	1392600	339620	152410	214810	310780	330870	0.391081	-2.72393	-3.11501	1220
Q8K330	Protein phosphatase Slingshot homolog 3	Ssh3	sp|Q8K330|SSH3_MOUSE Protein phosphatase Slingshot homolog 3 OS=Mus musculus GN=Ssh3 PE=1 SV=1	1	2	3.2	72.227	649	0.0082002	1.9933	918550	125070	135070	145990	197510	142680	0.390584	-3.53214	-3.92273	3224
P59481	VIP36-like protein	Lman2l	sp|P59481|LMA2L_MOUSE VIP36-like protein OS=Mus musculus GN=Lman2l PE=1 SV=1	1	2	4.6	39.881	347	0.0045259	2.245	1021300	199590	148670	227820	208750	201350	0.390496	-3.12588	-3.51637	1219
Q9DA08	SAGA-associated factor 29 homolog	Ccdc101	sp|Q9DA08|SGF29_MOUSE SAGA-associated factor 29 OS=Mus musculus GN=Sgf29 PE=2 SV=1	1	5	19.5	33.298	293	0.00025961	4.7307	7037100	1018500	1322200	2261000	1407600	918240	0.389634	-0.374693	-0.764327	4353
Q9CZ42	ATP-dependent (S)-NAD(P)H-hydrate dehydratase	Carkd	sp|Q9CZ42|NNRD_MOUSE ATP-dependent (S)-NAD(P)H-hydrate dehydratase OS=Mus musculus GN=Carkd PE=1 SV=1	1	6	22.7	36.717	343	0	77.974	22600000	2437000	3930300	3952300	5054000	2774300	0.389487	1.04034	0.650852	4067
Q8C0N1	Kinesin-like protein KIF2B	Kif2b	sp|Q8C0N1|KIF2B_MOUSE Kinesin-like protein KIF2B OS=Mus musculus GN=Kif2b PE=1 SV=1	1	12	24	75.468	668	0	42.607	13714000	2457100	1549700	2761000	2397000	2089000	0.387218	0.37267	-0.0145483	2923
Q9WVJ2	26S proteasome non-ATPase regulatory subunit 13	Psmd13	sp|Q9WVJ2|PSD13_MOUSE 26S proteasome non-ATPase regulatory subunit 13 OS=Mus musculus GN=Psmd13 PE=1 SV=1	1	17	45.2	42.809	376	0	104.91	69259000	11420000	10297000	14484000	13058000	12517000	0.386147	2.84595	2.4598	4853
P60670	Nuclear protein localization protein 4 homolog	Nploc4	sp|P60670|NPL4_MOUSE Nuclear protein localization protein 4 homolog OS=Mus musculus GN=Nploc4 PE=1 SV=3	1	19	28.1	68.016	608	0	147.02	65664000	10837000	8267000	10863000	16074000	9009100	0.38578	2.64939	2.26361	1231
O09107	Insulin-like 3;Insulin-like 3 B chain;Insulin-like 3 A chain	Insl3	sp|O09107|INSL3_MOUSE Insulin-like 3 OS=Mus musculus GN=Insl3 PE=1 SV=2	1	1	9.8	13.586	122	0.004519	2.2278	8329500	544620	2291900	1098500	2010600	1170900	0.385607	-0.433481	-0.819088	474
P61759	Prefoldin subunit 3	Vbp1	sp|P61759|PFD3_MOUSE Prefoldin subunit 3 OS=Mus musculus GN=Vbp1 PE=1 SV=2	1	5	25.5	22.435	196	0	8.6092	10264000	1174200	1924800	1626900	1909700	2021200	0.383981	-0.00684643	-0.390827	1269
Q9CPR1	RWD domain-containing protein 4	Rwdd4	sp|Q9CPR1|RWDD4_MOUSE RWD domain-containing protein 4 OS=Mus musculus GN=Rwdd4 PE=2 SV=1	1	4	22.9	21.137	188	0	7.2793	28230000	2629200	6990700	4617600	6651400	4734300	0.383233	1.50424	1.12101	3840
Q8R4R6	Nucleoporin NUP53	Nup35	sp|Q8R4R6|NUP53_MOUSE Nucleoporin NUP53 OS=Mus musculus GN=Nup35 PE=1 SV=2	1	3	13.2	34.785	325	0.0002736	5.6806	4833400	1370600	405550	531660	1104200	1299200	0.381967	-1.02067	-1.40264	3354
Q8BQ30	Phostensin	Ppp1r18	sp|Q8BQ30|PPR18_MOUSE Phostensin OS=Mus musculus GN=Ppp1r18 PE=1 SV=1	1	5	11.4	65.629	594	0.00050467	4.3367	1895900	287860	273040	180510	844930	265720	0.381646	-2.43206	-2.81371	2796
E9Q137		Tex264	tr|E9Q137|E9Q137_MOUSE Protein Tex264 OS=Mus musculus GN=Tex264 PE=1 SV=1	1	3	8.1	33.589	309	0.00027442	5.7258	4276500	781720	666980	748260	1048100	876830	0.378313	-1.07049	-1.4488	308
Q9Z0R4	Intersectin-1	Itsn1	sp|Q9Z0R4|ITSN1_MOUSE Intersectin-1 OS=Mus musculus GN=Itsn1 PE=1 SV=2	1	1	1.3	194.29	1714	0.0081864	1.9846	147440	33449	12522	23808	25874	25411	0.3782	-6.21146	-6.58966	4877
Q9D4H1	Exocyst complex component 2	Exoc2	sp|Q9D4H1|EXOC2_MOUSE Exocyst complex component 2 OS=Mus musculus GN=Exoc2 PE=1 SV=1	1	14	14.6	103.96	924	0	19.81	10206000	1703700	1659800	1814300	1807200	2643700	0.377349	0.148168	-0.22918	4207
P97494	Glutamate--cysteine ligase catalytic subunit	Gclc	sp|P97494|GSH1_MOUSE Glutamate--cysteine ligase catalytic subunit OS=Mus musculus GN=Gclc PE=1 SV=4	1	4	7.4	72.571	637	0.00026048	4.832	251930	0	0	79053	95173	35860	0.375927	-4.84235	-5.21827	1481
Q8BGD9	Eukaryotic translation initiation factor 4B	Eif4b	sp|Q8BGD9|IF4B_MOUSE Eukaryotic translation initiation factor 4B OS=Mus musculus GN=Eif4b PE=1 SV=1	1	15	29.8	68.839	611	0	98.45	38152000	2668200	11523000	5648700	11293000	4847600	0.374973	1.86711	1.49214	2657
P58252	Elongation factor 2	Eef2	sp|P58252|EF2_MOUSE Elongation factor 2 OS=Mus musculus GN=Eef2 PE=1 SV=2	1	39	48.1	95.313	858	0	323.31	269820000	29744000	48177000	43103000	57366000	39792000	0.374962	4.63834	4.26338	1201
Q91VN6	Probable ATP-dependent RNA helicase DDX41	Ddx41	sp|Q91VN6|DDX41_MOUSE Probable ATP-dependent RNA helicase DDX41 OS=Mus musculus GN=Ddx41 PE=1 SV=2	1	17	28	69.819	622	0	39.713	9685300	1312300	1729700	1819300	2710400	1257000	0.374596	-0.0131159	-0.387712	3505
Q9D424	Calcium-binding tyrosine phosphorylation-regulated protein	Cabyr	sp|Q9D424|CABYR_MOUSE Calcium-binding tyrosine phosphorylation-regulated protein OS=Mus musculus GN=Cabyr PE=1 SV=1	1	9	25.4	48.332	453	0	60.663	67589000	12572000	8769100	12592000	11643000	14289000	0.373881	2.78715	2.41327	4194
P50427	Steryl-sulfatase	Sts	sp|P50427|STS_MOUSE Steryl-sulfatase OS=Mus musculus GN=Sts PE=1 SV=1	1	9	14.9	66.59	624	0	19.034	7009000	1489800	837380	1306800	1529900	1256800	0.372154	-0.44733	-0.819484	1111
P46664	Adenylosuccinate synthetase isozyme 2	Adss	sp|P46664|PURA2_MOUSE Adenylosuccinate synthetase isozyme 2 OS=Mus musculus GN=Adss PE=1 SV=2	1	6	18.2	50.02	456	0	14.823	4577200	0	1426800	464670	1140600	351620	0.371478	-1.69835	-2.06983	1052
Q9JKY7		Cyp2d22	tr|Q9JKY7|Q9JKY7_MOUSE Cytochrome P450 CYP2D22 OS=Mus musculus GN=Cyp2d22 PE=1 SV=1	1	3	7.6	56.467	500	0.0099606	1.8932	342940	64684	36674	78614	55152	47978	0.371387	-4.96741	-5.33879	4637
Q9D3S9	Probable serine carboxypeptidase CPVL	Cpvl	sp|Q9D3S9|CPVL_MOUSE Probable serine carboxypeptidase CPVL OS=Mus musculus GN=Cpvl PE=2 SV=2	1	4	8.4	54.762	478	0.003913	2.3218	2398700	169890	657000	367190	454880	401690	0.371065	-2.18964	-2.5607	4183
P80315	T-complex protein 1 subunit delta	Cct4	sp|P80315|TCPD_MOUSE T-complex protein 1 subunit delta OS=Mus musculus GN=Cct4 PE=1 SV=3	1	31	55.5	58.066	539	0	323.31	1157400000	151750000	147990000	152530000	258650000	153210000	0.370216	6.61865	6.24843	1424
Q8BHJ9	Pre-mRNA-splicing factor SLU7	Slu7	sp|Q8BHJ9|SLU7_MOUSE Pre-mRNA-splicing factor SLU7 OS=Mus musculus GN=Slu7 PE=1 SV=1	1	12	24.8	68.079	585	0	82.27	13402000	1605200	2504600	2071500	4012400	1740800	0.369911	0.394556	0.0246458	2697
Q99KV1	DnaJ homolog subfamily B member 11	Dnajb11	sp|Q99KV1|DJB11_MOUSE DnaJ homolog subfamily B member 11 OS=Mus musculus GN=Dnajb11 PE=1 SV=1	1	13	36	40.555	358	0	110.26	50876000	6229000	9380200	8622900	9241700	10051000	0.369502	2.32479	1.95529	3748
P97310	DNA replication licensing factor MCM2	Mcm2	sp|P97310|MCM2_MOUSE DNA replication licensing factor MCM2 OS=Mus musculus GN=Mcm2 PE=1 SV=3	1	10	12.7	102.08	904	0	16.819	3417200	636190	460280	755950	478910	783080	0.368363	-1.4966	-1.86496	1446
Q8BKN5	Gamma-tubulin complex component 5	Tubgcp5	sp|Q8BKN5|GCP5_MOUSE Gamma-tubulin complex component 5 OS=Mus musculus GN=Tubgcp5 PE=2 SV=2	1	7	10.1	117.98	1024	0	11.159	1099100	287490	91561	158180	198120	243440	0.367625	-3.23517	-3.60279	2739
Q9WUM4	Coronin-1C	Coro1c	sp|Q9WUM4|COR1C_MOUSE Coronin-1C OS=Mus musculus GN=Coro1c PE=1 SV=2	1	4	8.9	53.12	474	0.00027609	5.8448	3666000	279020	905400	642420	1045900	337370	0.367324	-1.60416	-1.97149	4829
P56213	FAD-linked sulfhydryl oxidase ALR	Gfer	sp|P56213|ALR_MOUSE FAD-linked sulfhydryl oxidase ALR OS=Mus musculus GN=Gfer PE=1 SV=2	1	3	23.2	22.876	198	0.00026116	4.8805	4883900	888550	841610	932000	1148900	1072800	0.364918	-0.823728	-1.18865	1178
Q9D720	Non-structural maintenance of chromosomes element 1 homolog	Nsmce1	sp|Q9D720|NSE1_MOUSE Non-structural maintenance of chromosomes element 1 homolog OS=Mus musculus GN=Nsmce1 PE=1 SV=1	1	4	21.8	30.708	266	0	14.149	11548000	1976800	1458100	1377000	2790300	2259600	0.364323	0.148931	-0.215392	4258
Q8BFT2	HAUS augmin-like complex subunit 4	Haus4	sp|Q8BFT2|HAUS4_MOUSE HAUS augmin-like complex subunit 4 OS=Mus musculus GN=Haus4 PE=1 SV=1	1	12	28.7	42.196	363	0	16.395	14371000	3522900	1442400	2419200	2559400	3276400	0.363478	0.557075	0.193597	2634
Q8VIG3	Radial spoke head 1 homolog	Rsph1	sp|Q8VIG3|RSPH1_MOUSE Radial spoke head 1 homolog OS=Mus musculus GN=Rsph1 PE=1 SV=2	1	15	64.5	34.181	301	0	323.31	631650000	50207000	141270000	102850000	125450000	81710000	0.361819	5.77886	5.41704	3481
Q9WTX5	S-phase kinase-associated protein 1	Skp1	sp|Q9WTX5|SKP1_MOUSE S-phase kinase-associated protein 1 OS=Mus musculus GN=Skp1 PE=1 SV=3	1	6	25.8	18.672	163	0	125.49	172950000	15826000	42638000	28482000	43149000	25161000	0.361585	4.08171	3.72013	4807
Q9CPN7;F6R7E8		1810009J06Rik;Gm2663	tr|Q9CPN7|Q9CPN7_MOUSE Protein 1810009J06Rik OS=Mus musculus GN=1810009J06Rik PE=2 SV=1;tr|F6R7E8|F6R7E8_MOUSE Protein Gm2663 OS=Mus musculus GN=Gm2663 PE=4 SV=1	2	1	8.1	26.503	247	0.00094742	3.2917	59233000	12845000	4882200	6052000	13206000	10961000	0.36156	2.36787	2.00631	370
Q61390	T-complex protein 1 subunit zeta-2	Cct6b	sp|Q61390|TCPW_MOUSE T-complex protein 1 subunit zeta-2 OS=Mus musculus GN=Cct6b PE=1 SV=4	1	19	37.5	58.184	531	0	38.926	80102000	11856000	11788000	12628000	18478000	12467000	0.360662	2.94504	2.58438	2026
Q9EQC8		Prcc	tr|Q9EQC8|Q9EQC8_MOUSE Papillary renal cell carcinoma (Translocation-associated) OS=Mus musculus GN=Prcc PE=1 SV=1	1	3	9.6	52.301	491	0.00026295	4.9653	5944400	610320	1153400	1033500	1051600	956060	0.360281	-0.871975	-1.23226	4499
Q9R059	Four and a half LIM domains protein 3	Fhl3	sp|Q9R059|FHL3_MOUSE Four and a half LIM domains protein 3 OS=Mus musculus GN=Fhl3 PE=1 SV=2	1	3	13.8	31.794	289	0	16.013	9802800	1228200	1864900	1903700	2055200	1558600	0.360237	-0.0209621	-0.381199	4751
Q8C0E2	Vacuolar protein sorting-associated protein 26B	Vps26b	sp|Q8C0E2|VP26B_MOUSE Vacuolar protein sorting-associated protein 26B OS=Mus musculus GN=Vps26b PE=1 SV=1	1	8	25.9	39.124	336	0	18.135	5781400	833250	933910	965560	1248800	1000200	0.359614	-0.800318	-1.15993	2914
Q6A098	Selenocysteine insertion sequence-binding protein 2-like	Secisbp2l	sp|Q6A098|SBP2L_MOUSE Selenocysteine insertion sequence-binding protein 2-like OS=Mus musculus GN=Secisbp2l PE=1 SV=2	1	2	1.7	119.64	1086	0.0030722	2.4383	1783600	513290	84428	290770	304160	0	0.359081	-2.88408	-3.24317	2196
Q9QY53	Nephrocystin-1	Nphp1	sp|Q9QY53|NPHP1_MOUSE Nephrocystin-1 OS=Mus musculus GN=Nphp1 PE=1 SV=1	1	18	25.8	77.034	687	0	64.157	49531000	6569700	8189800	8468000	12627000	6477300	0.35907	2.25488	1.89581	4701
Q61133	Glutathione S-transferase theta-2	Gstt2	sp|Q61133|GSTT2_MOUSE Glutathione S-transferase theta-2 OS=Mus musculus GN=Gstt2 PE=1 SV=4	1	4	22.5	27.634	244	0	12.591	17120000	2053200	3174800	2900100	3874100	2599400	0.359057	0.732306	0.373249	1997
Q06138	Calcium-binding protein 39	Cab39	sp|Q06138|CAB39_MOUSE Calcium-binding protein 39 OS=Mus musculus GN=Cab39 PE=1 SV=2	1	13	34.3	39.842	341	0	76.012	42884000	5058700	8103800	8011300	8972900	6401300	0.358589	2.05825	1.69966	1552
Q6PDY2	2-aminoethanethiol dioxygenase	Ado	sp|Q6PDY2|AEDO_MOUSE 2-aminoethanethiol dioxygenase OS=Mus musculus GN=Ado PE=1 SV=2	1	3	13.3	28.372	256	0.00027181	5.595	8559000	800820	1921600	1903900	1395400	1259000	0.358323	-0.309769	-0.668092	2324
Q62418	Drebrin-like protein	Dbnl	sp|Q62418|DBNL_MOUSE Drebrin-like protein OS=Mus musculus GN=Dbnl PE=1 SV=2	1	6	17.9	48.699	436	0	16.343	6721600	710150	1495200	1102600	1553600	1118000	0.357827	-0.577926	-0.935753	2108
Q921M7;Q8BHZ0	Protein FAM49B	Fam49b	sp|Q921M7|FA49B_MOUSE Protein FAM49B OS=Mus musculus GN=Fam49b PE=1 SV=1	2	10	42.6	36.776	324	0	134.89	37778000	5729300	5140600	7136000	8132800	4807500	0.356516	1.81764	1.46113	3636
P70362	Ubiquitin fusion degradation protein 1 homolog	Ufd1l	sp|P70362|UFD1_MOUSE Ubiquitin fusion degradation protein 1 homolog OS=Mus musculus GN=Ufd1l PE=1 SV=2	1	12	44.6	34.481	307	0	121.7	182750000	18431000	38672000	29762000	43234000	25780000	0.355864	4.11548	3.75962	1403
Q8BTY8	Sec1 family domain-containing protein 2	Scfd2	sp|Q8BTY8|SCFD2_MOUSE Sec1 family domain-containing protein 2 OS=Mus musculus GN=Scfd2 PE=1 SV=1	1	9	18.7	74.75	684	0	101	7196900	1887900	690850	1293800	1481400	1353100	0.355282	-0.432126	-0.787408	2828
Q80V91	Probable E3 ubiquitin-protein ligase DTX3	Dtx3	sp|Q80V91|DTX3_MOUSE Probable E3 ubiquitin-protein ligase DTX3 OS=Mus musculus GN=Dtx3 PE=1 SV=2	1	2	6.6	37.982	347	0.0031397	2.6495	1694000	391020	216760	318280	495700	272250	0.355175	-2.4041	-2.75928	2534
P14733	Lamin-B1	Lmnb1	sp|P14733|LMNB1_MOUSE Lamin-B1 OS=Mus musculus GN=Lmnb1 PE=1 SV=3	1	9	17.9	66.785	588	0	12.817	3279200	654520	444080	389270	1022200	683380	0.353673	-1.51665	-1.87032	823
O35125	Leucine-rich repeat-containing protein 23	Lrrc23	sp|O35125|LRC23_MOUSE Leucine-rich repeat-containing protein 23 OS=Mus musculus GN=Lrrc23 PE=1 SV=1	1	9	31.8	39.292	340	0	106.02	23708000	3694400	3186000	4240100	4878900	3385300	0.353383	1.15291	0.799522	489
Q922G7	Tektin-2	Tekt2	sp|Q922G7|TEKT2_MOUSE Tektin-2 OS=Mus musculus GN=Tekt2 PE=1 SV=1	1	11	27.9	50.311	430	0	52.53	16944000	3341000	2358700	2935700	4182000	3120000	0.352625	0.862741	0.510116	3652
A6X935	Inter alpha-trypsin inhibitor, heavy chain 4	Itih4	sp|A6X935|ITIH4_MOUSE Inter alpha-trypsin inhibitor, heavy chain 4 OS=Mus musculus GN=Itih4 PE=1 SV=2	1	7	8.5	104.66	942	0	9.4694	2097200	243310	390840	368760	281080	488930	0.351691	-2.32457	-2.67626	135
Q9CQ79	Thioredoxin domain-containing protein 9	Txndc9	sp|Q9CQ79|TXND9_MOUSE Thioredoxin domain-containing protein 9 OS=Mus musculus GN=Txndc9 PE=1 SV=1	1	2	11.1	26.259	226	0.00071839	3.4535	5279500	549320	1084400	886980	1134000	789810	0.351629	-1.00108	-1.35271	3882
Q9CYN2	Signal peptidase complex subunit 2	Spcs2	sp|Q9CYN2|SPCS2_MOUSE Signal peptidase complex subunit 2 OS=Mus musculus GN=Spcs2 PE=1 SV=1	1	6	28.3	24.977	226	0	54.398	57970000	11157000	8553600	12862000	11350000	11028000	0.35133	2.66051	2.30918	4059
O88485	Cytoplasmic dynein 1 intermediate chain 1	Dync1i1	sp|O88485|DC1I1_MOUSE Cytoplasmic dynein 1 intermediate chain 1 OS=Mus musculus GN=Dync1i1 PE=1 SV=2	1	3	5.3	70.724	628	0.0007362	3.8782	1705600	240310	304810	311630	380970	288220	0.351104	-2.51344	-2.86455	639
Q148A4	Protein phosphatase 1 regulatory subunit 32	Ppp1r32	sp|Q148A4|PPR32_MOUSE Protein phosphatase 1 regulatory subunit 32 OS=Mus musculus GN=Ppp1r32 PE=1 SV=1	1	14	51.1	47.809	427	0	47.381	26065000	3185900	5400900	4878600	7182300	3512800	0.350674	1.4241	1.07343	1584
O08811	TFIIH basal transcription factor complex helicase XPD subunit	Ercc2	sp|O08811|ERCC2_MOUSE TFIIH basal transcription factor complex helicase XPD subunit OS=Mus musculus GN=Ercc2 PE=1 SV=2	1	14	22.8	86.841	760	0	42.67	14874000	2555100	2227400	2133300	3748000	2918700	0.349088	0.624438	0.27535	462
Q99M51;O55033	Cytoplasmic protein NCK1	Nck1	sp|Q99M51|NCK1_MOUSE Cytoplasmic protein NCK1 OS=Mus musculus GN=Nck1 PE=1 SV=1	2	12	34.5	42.89	377	0	19.427	17479000	2402000	3088000	2667800	4084100	3184300	0.348707	0.815141	0.466434	3786
Q9D358	Low molecular weight phosphotyrosine protein phosphatase	Acp1	sp|Q9D358|PPAC_MOUSE Low molecular weight phosphotyrosine protein phosphatase OS=Mus musculus GN=Acp1 PE=1 SV=3	1	5	31.6	18.192	158	0	41.919	390260000	75867000	47062000	60345000	87592000	69290000	0.348489	5.27041	4.92193	4173
Q9JIA7	Sphingosine kinase 2	Sphk2	sp|Q9JIA7|SPHK2_MOUSE Sphingosine kinase 2 OS=Mus musculus GN=Sphk2 PE=1 SV=2	1	4	10.2	65.617	617	0.00073368	3.801	3602400	452650	583790	657590	568520	623190	0.348048	-1.59098	-1.93903	4580
Q0P5X1	Leucine-rich repeat and IQ domain-containing protein 1	Lrriq1	sp|Q0P5X1|LRIQ1_MOUSE Leucine-rich repeat and IQ domain-containing protein 1 OS=Mus musculus GN=Lrriq1 PE=2 SV=2	1	2	1.5	191.81	1673	0.001854	2.9809	171070	22440	24613	40556	47489	11551	0.347709	-6.04242	-6.39013	1576
P35290	Ras-related protein Rab-24	Rab24	sp|P35290|RAB24_MOUSE Ras-related protein Rab-24 OS=Mus musculus GN=Rab24 PE=1 SV=2	1	6	28.6	23.144	203	0	10.342	5643500	1306200	519290	671520	1717600	829350	0.347268	-0.911758	-1.25903	992
O88746	Target of Myb protein 1	Tom1	sp|O88746|TOM1_MOUSE Target of Myb protein 1 OS=Mus musculus GN=Tom1 PE=1 SV=1	1	9	21.7	54.325	492	0	19.745	14796000	3437800	1583700	2847900	2642000	2890400	0.347153	0.590525	0.243372	664
Q8R526	Polycystic kidney disease protein 1-like 1	Pkd1l1	sp|Q8R526|PK1L1_MOUSE Polycystic kidney disease protein 1-like 1 OS=Mus musculus GN=Pkd1l1 PE=1 SV=2	1	2	0.7	290.84	2615	0.0095594	1.9141	2044600	0	612030	216520	340730	245500	0.347055	-2.81939	-3.16644	3358
P62869;A6PWE0	Transcription elongation factor B polypeptide 2	Tceb2	sp|P62869|ELOB_MOUSE Transcription elongation factor B polypeptide 2 OS=Mus musculus GN=Tceb2 PE=1 SV=1	2	12	91.5	13.17	118	0	130.83	545510000	66660000	101990000	76279000	150430000	83521000	0.346506	5.733	5.3865	1328
P29533	Vascular cell adhesion protein 1	Vcam1	sp|P29533|VCAM1_MOUSE Vascular cell adhesion protein 1 OS=Mus musculus GN=Vcam1 PE=1 SV=1	1	4	6.8	81.317	739	0	32.752	2221300	321570	343710	476770	268530	489090	0.344943	-2.22284	-2.56779	954
B2RUJ5	Amyloid beta A4 precursor protein-binding family A member 1	Apba1	sp|B2RUJ5|APBA1_MOUSE Amyloid beta A4 precursor protein-binding family A member 1 OS=Mus musculus GN=Apba1 PE=1 SV=2	1	2	3.7	92.908	842	0.00026028	4.8064	711270	91598	140860	113450	180290	122020	0.344619	-3.7725	-4.11712	166
Q91VH6	Protein MEMO1	Memo1	sp|Q91VH6|MEMO1_MOUSE Protein MEMO1 OS=Mus musculus GN=Memo1 PE=1 SV=1	1	9	37.7	33.692	297	0	51.286	41381000	4781300	6566000	6099700	9631200	5096500	0.344391	1.85158	1.50719	3499
P97765	WW domain-binding protein 2	Wbp2	sp|P97765|WBP2_MOUSE WW domain-binding protein 2 OS=Mus musculus GN=Wbp2 PE=1 SV=1	1	5	16.9	28.032	261	0	18.593	104530000	15739000	14284000	16826000	20993000	16189000	0.342779	3.27006	2.92728	1487
P48722	Heat shock 70 kDa protein 4L	Hspa4l	sp|P48722|HS74L_MOUSE Heat shock 70 kDa protein 4L OS=Mus musculus GN=Hspa4l PE=1 SV=2	1	52	66	94.381	838	0	323.31	484710000	53760000	90899000	76461000	95414000	79430000	0.342752	5.49106	5.14831	1085
P61022	Calcineurin B homologous protein 1	Chp1	sp|P61022|CHP1_MOUSE Calcineurin B homologous protein 1 OS=Mus musculus GN=Chp1 PE=1 SV=2	1	3	15.9	22.432	195	0.0078092	2.0322	4645500	671110	982660	689230	1241100	1061400	0.34247	-0.936859	-1.27933	1242
Q8VCM7	Fibrinogen gamma chain	Fgg	sp|Q8VCM7|FIBG_MOUSE Fibrinogen gamma chain OS=Mus musculus GN=Fgg PE=1 SV=1	1	12	31.9	49.391	436	0	59.712	24696000	2374200	4490500	3758800	4862800	3228500	0.342429	1.07057	0.728138	3397
O70475	UDP-glucose 6-dehydrogenase	Ugdh	sp|O70475|UGDH_MOUSE UDP-glucose 6-dehydrogenase OS=Mus musculus GN=Ugdh PE=1 SV=1	1	6	16	54.831	493	0	11.339	3823200	410190	626460	573090	1192800	322800	0.342084	-1.61711	-1.95919	615
P97807	Fumarate hydratase, mitochondrial	Fh	sp|P97807|FUMH_MOUSE Fumarate hydratase, mitochondrial OS=Mus musculus GN=Fh PE=1 SV=3	1	2	5.1	54.356	507	0.0020756	2.9204	510010	0	170670	135550	67959	53419	0.341796	-4.55334	-4.89514	1492
Q9D8L5	Coiled-coil domain-containing protein 91	Ccdc91	sp|Q9D8L5|CCD91_MOUSE Coiled-coil domain-containing protein 91 OS=Mus musculus GN=Ccdc91 PE=1 SV=2	1	2	6.1	50.006	442	0	7.5848	1004800	211530	133600	181400	210770	210320	0.341699	-3.20986	-3.55156	4294
P97427	Dihydropyrimidinase-related protein 1	Crmp1	sp|P97427|DPYL1_MOUSE Dihydropyrimidinase-related protein 1 OS=Mus musculus GN=Crmp1 PE=1 SV=1	1	8	16.1	62.167	572	0.00050878	4.4408	787730	226910	0	121510	223380	154710	0.341309	-3.52229	-3.8636	1467
Q9CQ46	EF-hand calcium-binding domain-containing protein 2	Efcab2	sp|Q9CQ46|EFCB2_MOUSE EF-hand calcium-binding domain-containing protein 2 OS=Mus musculus GN=Efcab2 PE=1 SV=1	1	6	32.9	18.929	164	0	12.55	23132000	2162300	5483400	4570800	3733000	4039000	0.340388	1.14519	0.804798	3873
Q8BV13	COP9 signalosome complex subunit 7b	Cops7b	sp|Q8BV13|CSN7B_MOUSE COP9 signalosome complex subunit 7b OS=Mus musculus GN=Cops7b PE=1 SV=1	1	6	27.7	29.689	264	0	13.273	13307000	1964300	2277000	2611000	3335800	1827100	0.338769	0.440323	0.101554	2842
Q9D5A0	Sperm equatorial segment protein 1	Spesp1	sp|Q9D5A0|SPESP_MOUSE Sperm equatorial segment protein 1 OS=Mus musculus GN=Spesp1 PE=1 SV=2	1	6	21.3	44.701	399	0	8.0638	7079100	725510	1653200	1094700	1244200	1619800	0.337972	-0.509885	-0.847857	4228
Q3TUU5;REV__Q8CFG8	Testis-expressed sequence 30 protein	Tex30	sp|Q3TUU5|TEX30_MOUSE Testis-expressed sequence 30 protein OS=Mus musculus GN=Tex30 PE=1 SV=1	2	9	49.3	25.263	225	0	58.452	200050000	18604000	37781000	25968000	47332000	25454000	0.337791	4.08734	3.74954	1660
Q7TSD4	Protein TBATA	Tbata	sp|Q7TSD4|TBATA_MOUSE Protein TBATA OS=Mus musculus GN=Tbata PE=1 SV=2	1	6	19.3	43.841	393	0	11.301	11778000	1926000	2003700	2348800	2755600	1958600	0.335847	0.330963	-0.00488377	2476
Q91WV0	Protein Dr1	Dr1	sp|Q91WV0|NC2B_MOUSE Protein Dr1 OS=Mus musculus GN=Dr1 PE=1 SV=1	1	1	8	19.43	176	0	7.7708	8925300	555470	2490100	1126300	2049100	1178400	0.335758	-0.409271	-0.745028	3554
Q3TWF6	WD repeat-containing protein 70	Wdr70	sp|Q3TWF6|WDR70_MOUSE WD repeat-containing protein 70 OS=Mus musculus GN=Wdr70 PE=1 SV=1	1	7	13.5	73.118	657	0	15.401	6058400	1199000	818390	860520	1460800	1291200	0.335185	-0.65749	-0.992675	1662
Q9QYE6	Golgin subfamily A member 5	Golga5	sp|Q9QYE6|GOGA5_MOUSE Golgin subfamily A member 5 OS=Mus musculus GN=Golga5 PE=1 SV=2	1	16	24.8	82.367	729	0	23.707	5406500	1165900	720490	1052800	1026600	1186200	0.33385	-0.770923	-1.10477	4710
Q9CX34	Suppressor of G2 allele of SKP1 homolog	Sugt1	sp|Q9CX34|SGT1_MOUSE Protein SGT1 homolog OS=Mus musculus GN=Sugt1 PE=1 SV=3	1	18	53.3	38.158	336	0	178.78	117890000	20303000	17412000	19088000	28728000	20169000	0.333479	3.58727	3.2538	4016
Q78JE5	F-box only protein 22	Fbxo22	sp|Q78JE5|FBX22_MOUSE F-box only protein 22 OS=Mus musculus GN=Fbxo22 PE=1 SV=2	1	2	6.2	44.202	402	0.0018519	2.9689	1914000	213050	366400	348710	380990	272170	0.331737	-2.48691	-2.81864	2422
P61982	14-3-3 protein gamma;14-3-3 protein gamma, N-terminally processed	Ywhag	sp|P61982|1433G_MOUSE 14-3-3 protein gamma OS=Mus musculus GN=Ywhag PE=1 SV=2	1	10	40.5	28.302	247	0	43.583	78691000	6209800	19243000	11500000	19647000	9561100	0.330535	2.80192	2.47138	1278
Q9D9W0	Speriolin-like protein	Spatc1l	sp|Q9D9W0|SPC1L_MOUSE Speriolin-like protein OS=Mus musculus GN=Spatc1l PE=1 SV=1	1	9	29.8	38.163	342	0	17.497	9743100	2267900	895330	837850	2551300	2233000	0.329348	-0.138748	-0.468096	4348
Q8BH79	Anoctamin-10	Ano10	sp|Q8BH79|ANO10_MOUSE Anoctamin-10 OS=Mus musculus GN=Ano10 PE=1 SV=1	1	2	3.9	76.187	659	0.0032794	2.4098	442910	150910	0	129030	57309	65022	0.328789	-4.56449	-4.89328	2684
Q9WV60	Glycogen synthase kinase-3 beta	Gsk3b	sp|Q9WV60|GSK3B_MOUSE Glycogen synthase kinase-3 beta OS=Mus musculus GN=Gsk3b PE=1 SV=2	1	6	16.2	46.71	420	0.0023015	2.897	4392700	925680	412030	630870	949250	644010	0.32572	-1.3486	-1.67432	4841
Q3TJD7	PDZ and LIM domain protein 7	Pdlim7	sp|Q3TJD7|PDLI7_MOUSE PDZ and LIM domain protein 7 OS=Mus musculus GN=Pdlim7 PE=1 SV=1	1	3	7.7	50.118	457	0.00071942	3.4708	1839900	348890	264610	248600	505400	365100	0.325141	-2.37249	-2.69763	1643
Q5SVQ0	Histone acetyltransferase KAT7	Kat7	sp|Q5SVQ0|KAT7_MOUSE Histone acetyltransferase KAT7 OS=Mus musculus GN=Kat7 PE=1 SV=1	1	3	6.4	70.641	613	0.0027168	2.7378	382190	79634	53351	71281	70298	90152	0.323949	-4.59448	-4.91843	1919
P63166	Small ubiquitin-related modifier 1	Sumo1	sp|P63166|SUMO1_MOUSE Small ubiquitin-related modifier 1 OS=Mus musculus GN=Sumo1 PE=1 SV=1	1	2	27.7	11.557	101	0	6.7282	16862000	1329400	4955600	4379300	3612100	1743000	0.323732	0.70463	0.380898	1362
P61202	COP9 signalosome complex subunit 2	Cops2	sp|P61202|CSN2_MOUSE COP9 signalosome complex subunit 2 OS=Mus musculus GN=Cops2 PE=1 SV=1	1	17	42	51.596	443	0	102.5	60406000	11334000	7204900	10663000	11367000	9906700	0.32274	2.5195	2.19676	1252
Q9ES00	Ubiquitin conjugation factor E4 B	Ube4b	sp|Q9ES00|UBE4B_MOUSE Ubiquitin conjugation factor E4 B OS=Mus musculus GN=Ube4b PE=1 SV=3	1	21	21.7	133.32	1173	0	56.337	11068000	2114000	1190200	1388000	1664500	2809200	0.322442	0.00901063	-0.313432	4536
Q9R0P5	Destrin	Dstn	sp|Q9R0P5|DEST_MOUSE Destrin OS=Mus musculus GN=Dstn PE=1 SV=3	1	6	47.3	18.521	165	0	60.494	102450000	12857000	19306000	14778000	23637000	18198000	0.322238	3.32095	2.99871	4766
O35129	Prohibitin-2	Phb2	sp|O35129|PHB2_MOUSE Prohibitin-2 OS=Mus musculus GN=Phb2 PE=1 SV=1	1	2	7.4	33.296	299	0.0027137	2.7283	474420	130640	0	77864	74131	191780	0.322134	-4.16346	-4.48559	491
P10711	Transcription elongation factor A protein 1	Tcea1	sp|P10711|TCEA1_MOUSE Transcription elongation factor A protein 1 OS=Mus musculus GN=Tcea1 PE=1 SV=2	1	11	35.2	33.88	301	0	28.794	15640000	1558000	3692900	2547100	3665300	2401100	0.321883	0.605087	0.283204	784
O08585	Clathrin light chain A	Clta	sp|O08585|CLCA_MOUSE Clathrin light chain A OS=Mus musculus GN=Clta PE=1 SV=2	1	5	14.9	25.604	235	0	13.521	79232000	12826000	9317100	10013000	15653000	13503000	0.320633	2.79205	2.47142	442
Q3V009	Transmembrane emp24 domain-containing protein 1	Tmed1	sp|Q3V009|TMED1_MOUSE Transmembrane emp24 domain-containing protein 1 OS=Mus musculus GN=Tmed1 PE=1 SV=1	1	3	14.5	25.262	227	0.0039113	2.3202	14746000	4946200	0	227080	367780	1247300	0.320582	-1.97808	-2.29866	1797
Q7TPM1	Protein PRRC2B	Prrc2b	sp|Q7TPM1|PRC2B_MOUSE Protein PRRC2B OS=Mus musculus GN=Prrc2b PE=1 SV=1	1	4	2.7	160.91	1486	0.0078026	2.0267	85212	26120	37269	0	0	21823	0.320107	-5.66121	-5.98131	2462
Q3V1H1	Cytoskeleton-associated protein 2	Ckap2	sp|Q3V1H1|CKAP2_MOUSE Cytoskeleton-associated protein 2 OS=Mus musculus GN=Ckap2 PE=1 SV=1	1	6	11.9	74.028	664	0	8.3944	1693700	154560	412650	214800	672960	180190	0.319749	-2.64466	-2.96441	1818
A2AG10		Nup62cl	tr|A2AG10|A2AG10_MOUSE Protein Nup62cl OS=Mus musculus GN=Nup62cl PE=1 SV=1	1	1	4	31.222	272	0.0031299	2.6165	1068400	167550	169190	201490	220260	173880	0.319664	-3.22967	-3.54933	68
Q3U1V6	Ubiquitin-conjugating enzyme E2 variant 3	Uevld	sp|Q3U1V6|UEVLD_MOUSE Ubiquitin-conjugating enzyme E2 variant 3 OS=Mus musculus GN=Uevld PE=1 SV=1	1	1	2.3	51.681	471	0.0087866	1.9596	895260	197060	90567	230330	186930	89473	0.319342	-3.56376	-3.8831	1683
P57780;Q9JI91;O88990;E9PX29	Alpha-actinin-4	Actn4	sp|P57780|ACTN4_MOUSE Alpha-actinin-4 OS=Mus musculus GN=Actn4 PE=1 SV=1	4	24	32.2	104.98	912	0	39.662	8654900	523820	2601100	1498700	1457800	1174300	0.318582	-0.437306	-0.755888	1197
A2CG63	AT-rich interactive domain-containing protein 4B	Arid4b	sp|A2CG63|ARI4B_MOUSE AT-rich interactive domain-containing protein 4B OS=Mus musculus GN=Arid4b PE=1 SV=1	1	3	2.4	147.64	1314	0.0030742	2.4415	1105200	378600	0	81069	487610	151090	0.316846	-3.35288	-3.66973	106
O70591	Prefoldin subunit 2	Pfdn2	sp|O70591|PFD2_MOUSE Prefoldin subunit 2 OS=Mus musculus GN=Pfdn2 PE=1 SV=2	1	5	36.4	16.534	154	0	131.4	32568000	3043400	8016800	5305600	6605900	5526200	0.316777	1.64211	1.32533	625
Q3U1J4	DNA damage-binding protein 1	Ddb1	sp|Q3U1J4|DDB1_MOUSE DNA damage-binding protein 1 OS=Mus musculus GN=Ddb1 PE=1 SV=2	1	46	42.1	126.85	1140	0	323.31	146170000	21127000	22813000	24198000	23459000	29944000	0.316573	3.79395	3.47738	1682
Q6P5E6	ADP-ribosylation factor-binding protein GGA2	Gga2	sp|Q6P5E6|GGA2_MOUSE ADP-ribosylation factor-binding protein GGA2 OS=Mus musculus GN=Gga2 PE=1 SV=1	1	3	6.1	66.048	603	0.00026357	5.0229	530390	94297	46527	88587	252030	0	0.315987	-4.57925	-4.89524	2280
Q9D7M1	Glucose-induced degradation protein 8 homolog	Gid8	sp|Q9D7M1|GID8_MOUSE Glucose-induced degradation protein 8 homolog OS=Mus musculus GN=Gid8 PE=1 SV=1	1	11	65.4	26.778	228	0	121.02	59416000	7311100	11638000	11339000	13654000	8129800	0.315747	2.54216	2.22641	4269
Q6ZQ93	Ubiquitin carboxyl-terminal hydrolase 34	Usp34	sp|Q6ZQ93|UBP34_MOUSE Ubiquitin carboxyl-terminal hydrolase 34 OS=Mus musculus GN=Usp34 PE=1 SV=3	1	28	9.1	408.21	3582	0	45.489	2756100	514870	336720	451400	467320	548560	0.315556	-1.92751	-2.24307	2396
Q8BMJ3	Eukaryotic translation initiation factor 1A, X-chromosomal	Eif1ax	sp|Q8BMJ3|IF1AX_MOUSE Eukaryotic translation initiation factor 1A, X-chromosomal OS=Mus musculus GN=Eif1ax PE=2 SV=3	1	5	33.3	16.46	144	0	62.883	119830000	8908900	35224000	15257000	31164000	18732000	0.315293	3.48314	3.16785	2766
Q920I9	WD repeat-containing protein 7	Wdr7	sp|Q920I9|WDR7_MOUSE WD repeat-containing protein 7 OS=Mus musculus GN=Wdr7 PE=1 SV=3	1	24	19.1	163.45	1489	0	129.42	13854000	2170900	2056700	1898200	3409900	2334100	0.315044	0.415335	0.100291	3617
O88895	Histone deacetylase 3	Hdac3	sp|O88895|HDAC3_MOUSE Histone deacetylase 3 OS=Mus musculus GN=Hdac3 PE=1 SV=1	1	4	10.8	48.364	424	0.00028313	6.4293	2095300	206410	475760	202010	679700	358400	0.314372	-2.3387	-2.65308	674
Q9CPV5	Polyamine-modulated factor 1	Pmf1	sp|Q9CPV5|PMF1_MOUSE Polyamine-modulated factor 1 OS=Mus musculus GN=Pmf1 PE=1 SV=1	1	3	17.3	23.121	202	0.00071719	3.4308	2296300	376560	417380	370680	619760	433620	0.314265	-1.99956	-2.31383	3852
P29391;P49945	Ferritin light chain 1;Ferritin light chain 2	Ftl1;Ftl2	sp|P29391|FRIL1_MOUSE Ferritin light chain 1 OS=Mus musculus GN=Ftl1 PE=1 SV=2;sp|P49945|FRIL2_MOUSE Ferritin light chain 2 OS=Mus musculus GN=Ftl2 PE=3 SV=2	2	9	57.9	20.802	183	0	108.84	148430000	7796000	46184000	22030000	28105000	17633000	0.314039	3.58105	3.26701	953
Q571I9	Aldehyde dehydrogenase family 16 member A1	Aldh16a1	sp|Q571I9|A16A1_MOUSE Aldehyde dehydrogenase family 16 member A1 OS=Mus musculus GN=Aldh16a1 PE=1 SV=2	1	8	13.1	84.755	802	0	12.7	5044500	507840	692820	1236300	1033900	260470	0.313219	-1.4193	-1.73252	1861
A2ARZ3	Fibrous sheath-interacting protein 2	Fsip2	sp|A2ARZ3|FSIP2_MOUSE Fibrous sheath-interacting protein 2 OS=Mus musculus GN=Fsip2 PE=1 SV=3	1	63	11.3	784.85	6995	0	81.653	4983500	659490	829180	495610	976190	1333300	0.313194	-1.10124	-1.41443	95
Q80WW9	DDRGK domain-containing protein 1	Ddrgk1	sp|Q80WW9|DDRGK_MOUSE DDRGK domain-containing protein 1 OS=Mus musculus GN=Ddrgk1 PE=1 SV=2	1	4	17.8	35.977	315	0	18.322	17526000	3622700	2339700	2819000	3779800	3691600	0.312832	0.875506	0.562674	2563
Q08093	Calponin-2	Cnn2	sp|Q08093|CNN2_MOUSE Calponin-2 OS=Mus musculus GN=Cnn2 PE=1 SV=1	1	4	15.7	33.155	305	0.00026724	5.2889	4788400	918330	706090	800760	1154100	900490	0.312773	-0.978744	-1.29152	1564
Q8BVQ5	Protein phosphatase methylesterase 1	Ppme1	sp|Q8BVQ5|PPME1_MOUSE Protein phosphatase methylesterase 1 OS=Mus musculus GN=Ppme1 PE=1 SV=5	1	8	27.2	42.256	386	0	42.469	15690000	2016700	2801200	4707700	2931700	1549300	0.312385	0.582385	0.27	2854
Q8C6P5;Q3KNI6	Protein PIH1D3	E230019M04Rik;Pih1d3	tr|Q8C6P5|Q8C6P5_MOUSE MCG118654 OS=Mus musculus GN=Pih1h3b PE=2 SV=1;sp|Q3KNI6|PIHD3_MOUSE Protein PIH1D3 OS=Mus musculus GN=Pih1d3 PE=1 SV=1	2	1	5	24.517	218	0.00050176	4.2177	4705600	591120	910090	728300	1119100	770860	0.312305	-1.11391	-1.42622	1615
Q3UDK1	TRAF-type zinc finger domain-containing protein 1	Trafd1	sp|Q3UDK1|TRAD1_MOUSE TRAF-type zinc finger domain-containing protein 1 OS=Mus musculus GN=Trafd1 PE=1 SV=1	1	14	30.2	64.282	580	0	49.156	38853000	6200700	6401500	6550200	8846800	6835800	0.309796	1.98619	1.6764	1711
Q80TY5	Vacuolar protein sorting-associated protein 13B	Vps13b	sp|Q80TY5|VP13B_MOUSE Vacuolar protein sorting-associated protein 13B OS=Mus musculus GN=Vps13b PE=1 SV=2	1	8	2.3	445.92	4013	0.0002805	6.186	230030	40140	26648	23606	65156	35904	0.308145	-5.6052	-5.91334	2505
Q9ESX5	H/ACA ribonucleoprotein complex subunit 4	Dkc1	sp|Q9ESX5|DKC1_MOUSE H/ACA ribonucleoprotein complex subunit 4 OS=Mus musculus GN=Dkc1 PE=1 SV=4	1	5	15.9	57.401	509	0	9.4033	1667900	47849	787360	246530	263490	177630	0.30795	-3.03621	-3.34416	4554
P63037	DnaJ homolog subfamily A member 1	Dnaja1	sp|P63037|DNJA1_MOUSE DnaJ homolog subfamily A member 1 OS=Mus musculus GN=Dnaja1 PE=1 SV=1	1	17	46.3	44.868	397	0	257.38	190020000	23321000	35026000	35020000	39599000	26557000	0.30783	4.16577	3.85793	1353
P54869	Hydroxymethylglutaryl-CoA synthase, mitochondrial	Hmgcs2	sp|P54869|HMCS2_MOUSE Hydroxymethylglutaryl-CoA synthase, mitochondrial OS=Mus musculus GN=Hmgcs2 PE=1 SV=2	1	9	18.3	56.822	508	0	28.082	29492000	7358100	2768300	5205100	5627000	4945400	0.30724	1.50239	1.19515	1168
Q8BLF1	Neutral cholesterol ester hydrolase 1	Nceh1	sp|Q8BLF1|NCEH1_MOUSE Neutral cholesterol ester hydrolase 1 OS=Mus musculus GN=Nceh1 PE=1 SV=1	1	1	2.9	45.739	408	0.0007177	3.4357	1150900	146730	224200	170000	248450	222280	0.306594	-3.13538	-3.44197	2750
Q80UY2	E3 ubiquitin-protein ligase KCMF1	Kcmf1	sp|Q80UY2|KCMF1_MOUSE E3 ubiquitin-protein ligase KCMF1 OS=Mus musculus GN=Kcmf1 PE=1 SV=1	1	5	16.8	41.791	381	0	12.09	4572800	902860	657260	626940	1313400	873270	0.306459	-1.04901	-1.35546	2528
Q8BVM7	Amyotrophic lateral sclerosis 2 chromosomal region candidate gene 12 protein homolog	Als2cr12	sp|Q8BVM7|AL2SB_MOUSE Amyotrophic lateral sclerosis 2 chromosomal region candidate gene 12 protein homolog OS=Mus musculus GN=Als2cr12 PE=2 SV=1	1	2	5.2	44.915	383	0.0027064	2.7053	2139000	251920	457160	366910	430710	388070	0.305268	-2.23285	-2.53812	2848
Q8VE73	Cullin-7	Cul7	sp|Q8VE73|CUL7_MOUSE Cullin-7 OS=Mus musculus GN=Cul7 PE=1 SV=2	1	7	4.3	192.29	1689	0.003116	2.5716	1024000	107500	223760	140850	250330	165840	0.304729	-3.36307	-3.6678	3447
P10605	Cathepsin B;Cathepsin B light chain;Cathepsin B heavy chain	Ctsb	sp|P10605|CATB_MOUSE Cathepsin B OS=Mus musculus GN=Ctsb PE=1 SV=2	1	4	16.2	37.279	339	0	7.247	2382800	484700	229060	239920	672680	359130	0.304531	-2.26001	-2.56454	779
Q7TQ95	Protein lunapark	Lnp	sp|Q7TQ95|LNP_MOUSE Protein lunapark OS=Mus musculus GN=Lnp PE=1 SV=1	1	11	37.6	47.499	425	0	21.668	34800000	4096800	8044100	7900700	4814000	7787300	0.30418	1.84637	1.54219	2466
Q9D5V5	Cullin-5	Cul5	sp|Q9D5V5|CUL5_MOUSE Cullin-5 OS=Mus musculus GN=Cul5 PE=1 SV=3	1	23	28.2	90.973	780	0	80.9	18409000	3543400	2238200	3233900	3955500	2732900	0.304066	0.818782	0.514716	4239
P70429	Ena/VASP-like protein	Evl	sp|P70429|EVL_MOUSE Ena/VASP-like protein OS=Mus musculus GN=Evl PE=1 SV=2	1	2	8.9	44.337	414	0.00026192	4.9037	621210	63487	144780	58478	265830	88639	0.303576	-4.05817	-4.36175	1410
Q3TKR3;Q66X19	NACHT, LRR and PYD domains-containing protein 4C	Nlrp4c	sp|Q3TKR3|NAL4C_MOUSE NACHT, LRR and PYD domains-containing protein 4C OS=Mus musculus GN=Nlrp4c PE=2 SV=1	2	3	3.5	112.67	982	0.00050891	4.4414	483010	84713	59526	81947	105690	64519	0.302621	-4.4922	-4.79482	1645
Q60648	Ganglioside GM2 activator	Gm2a	sp|Q60648|SAP3_MOUSE Ganglioside GM2 activator OS=Mus musculus GN=Gm2a PE=1 SV=2	1	3	14.5	20.824	193	0.00050994	4.4611	15527000	972620	3533200	1867100	2684600	1982400	0.302402	0.213844	-0.0885582	1947
O70318	Band 4.1-like protein 2	Epb41l2	sp|O70318|E41L2_MOUSE Band 4.1-like protein 2 OS=Mus musculus GN=Epb41l2 PE=1 SV=2	1	19	19.1	109.94	988	0	42.178	7183500	932810	1695600	1801200	1508400	1139000	0.301136	-0.347159	-0.648294	605
Q9WTQ5	A-kinase anchor protein 12	Akap12	sp|Q9WTQ5|AKA12_MOUSE A-kinase anchor protein 12 OS=Mus musculus GN=Akap12 PE=1 SV=1	1	39	32.2	180.69	1684	0	323.31	46981000	7120600	8319800	7848100	10751000	8388000	0.300029	2.26528	1.96525	4804
Q6P069	Sorcin	Sri	sp|Q6P069|SORCN_MOUSE Sorcin OS=Mus musculus GN=Sri PE=1 SV=1	1	8	38.9	21.627	198	0	60.927	203750000	20303000	36927000	26277000	50797000	23857000	0.299747	4.09584	3.79609	2261
Q9DCD6	Gamma-aminobutyric acid receptor-associated protein	Gabarap	sp|Q9DCD6|GBRAP_MOUSE Gamma-aminobutyric acid receptor-associated protein OS=Mus musculus GN=Gabarap PE=1 SV=2	1	3	20.5	13.918	117	0	23.572	58882000	2965300	21599000	9011100	10422000	8464200	0.299623	2.32114	2.02151	4459
Q9Z2Y8	Proline synthase co-transcribed bacterial homolog protein	Prosc	sp|Q9Z2Y8|PROSC_MOUSE Proline synthase co-transcribed bacterial homolog protein OS=Mus musculus GN=Prosc PE=1 SV=1	1	6	27.4	30.048	274	0	11.621	15139000	0	8327700	1692500	2568400	719240	0.299407	-0.342217	-0.641624	4947
Q9CU65;Q3U2E2	Zinc finger MYM-type protein 2	Zmym2	sp|Q9CU65|ZMYM2_MOUSE Zinc finger MYM-type protein 2 OS=Mus musculus GN=Zmym2 PE=1 SV=3	2	8	7.3	154.64	1376	0	10.836	1608600	256390	268680	272300	382680	268850	0.29921	-2.60962	-2.90883	3982
Q5IR70	Cancer-associated gene 1 protein homolog	Cage1	sp|Q5IR70|CAGE1_MOUSE Cancer-associated gene 1 protein homolog OS=Mus musculus GN=Cage1 PE=1 SV=2	1	21	26.7	97.034	849	0	30.153	15600000	1829800	3033200	2440900	2618300	3164200	0.298311	0.555554	0.257243	1880
Q5SSE9	ATP-binding cassette sub-family A member 13	Abca13	sp|Q5SSE9|ABCAD_MOUSE ATP-binding cassette sub-family A member 13 OS=Mus musculus GN=Abca13 PE=2 SV=1	1	2	0.5	568.89	5034	0.008195	1.9888	92360	27556	9183.1	22082	16646	16892	0.297032	-6.65613	-6.95317	1908
Q5NCX5	Neuralized-like protein 4	Neurl4	sp|Q5NCX5|NEUL4_MOUSE Neuralized-like protein 4 OS=Mus musculus GN=Neurl4 PE=1 SV=1	1	17	13.3	167.64	1563	0	20.86	7206300	1162500	1002000	1029000	1389200	1356000	0.296841	-0.572123	-0.868964	1888
Q91V41	Ras-related protein Rab-14	Rab14	sp|Q91V41|RAB14_MOUSE Ras-related protein Rab-14 OS=Mus musculus GN=Rab14 PE=1 SV=3	1	15	75.3	23.897	215	0	323.31	146440000	17567000	29178000	22005000	49922000	16270000	0.296313	3.81809	3.52178	3489
Q8BWZ3	N-alpha-acetyltransferase 25, NatB auxiliary subunit	Naa25	sp|Q8BWZ3|NAA25_MOUSE N-alpha-acetyltransferase 25, NatB auxiliary subunit OS=Mus musculus GN=Naa25 PE=1 SV=1	1	16	19.3	111.71	972	0	62.101	15856000	2365600	2988300	2879400	3027900	3317700	0.295938	0.727682	0.431745	2874
Q9D1R2	Protein KTI12 homolog	Kti12	sp|Q9D1R2|KTI12_MOUSE Protein KTI12 homolog OS=Mus musculus GN=Kti12 PE=1 SV=1	1	3	9.1	38.444	351	0.00027678	5.8902	3520900	1115200	244770	371880	590910	998740	0.295913	-1.61971	-1.91562	4150
Q3THK7	GMP synthase [glutamine-hydrolyzing]	Gmps	sp|Q3THK7|GUAA_MOUSE GMP synthase [glutamine-hydrolyzing] OS=Mus musculus GN=Gmps PE=1 SV=2	1	27	45.6	76.723	693	0	151.7	77460000	10814000	12095000	13829000	14381000	11555000	0.295082	2.83165	2.53656	1635
O35344	Importin subunit alpha-4	Kpna3	sp|O35344|IMA4_MOUSE Importin subunit alpha-4 OS=Mus musculus GN=Kpna3 PE=1 SV=1	1	12	20.2	57.772	521	0	110.11	138030000	20255000	21264000	24241000	25950000	21819000	0.294858	3.69111	3.39625	505
Q64514	Tripeptidyl-peptidase 2	Tpp2	sp|Q64514|TPP2_MOUSE Tripeptidyl-peptidase 2 OS=Mus musculus GN=Tpp2 PE=1 SV=3	1	44	38.8	139.88	1262	0	323.31	96720000	11383000	18111000	16654000	16543000	16496000	0.294807	3.15959	2.86478	2152
Q9WTK3	Glycosylphosphatidylinositol anchor attachment 1 protein	Gpaa1	sp|Q9WTK3|GPAA1_MOUSE Glycosylphosphatidylinositol anchor attachment 1 protein OS=Mus musculus GN=Gpaa1 PE=1 SV=3	1	6	10	67.948	621	0	8.9173	3180100	1079200	217360	602830	466300	619570	0.29405	-1.73091	-2.02496	4798
Q8CI95	Oxysterol-binding protein-related protein 11	Osbpl11	sp|Q8CI95|OSB11_MOUSE Oxysterol-binding protein-related protein 11 OS=Mus musculus GN=Osbpl11 PE=1 SV=2	1	10	16	83.628	751	0	31.604	9264200	1898800	1244600	1814300	2246200	1365300	0.2936	-0.0650352	-0.358635	3123
Q3U3T8	WD repeat-containing protein 62	Wdr62	sp|Q3U3T8|WDR62_MOUSE WD repeat-containing protein 62 OS=Mus musculus GN=Wdr62 PE=1 SV=2	1	51	42.7	167.28	1523	0	323.31	146090000	20519000	23052000	20905000	34934000	21543000	0.29292	3.75675	3.46383	1692
P70265	6-phosphofructo-2-kinase/fructose-2,6-bisphosphatase 2;6-phosphofructo-2-kinase;Fructose-2,6-bisphosphatase	Pfkfb2	sp|P70265|F262_MOUSE 6-phosphofructo-2-kinase/fructose-2,6-bisphosphatase 2 OS=Mus musculus GN=Pfkfb2 PE=1 SV=2	1	4	7.7	59.925	519	0.0027205	2.7453	493940	87846	66481	48260	141690	99749	0.292586	-4.39633	-4.68892	1390
Q9QXG4	Acetyl-coenzyme A synthetase, cytoplasmic	Acss2	sp|Q9QXG4|ACSA_MOUSE Acetyl-coenzyme A synthetase, cytoplasmic OS=Mus musculus GN=Acss2 PE=1 SV=2	1	12	19	78.861	701	0	13.433	13890000	3102200	1667800	2888700	2482000	2507900	0.292462	0.499061	0.206598	4681
E9Q3G8		Nup153	tr|E9Q3G8|E9Q3G8_MOUSE Protein Nup153 OS=Mus musculus GN=Nup153 PE=1 SV=1	1	21	17.5	152.01	1462	0	52.001	9231800	1562200	1226600	1237400	2406200	1359600	0.291908	-0.217991	-0.509899	319
Q8R3C0	Mini-chromosome maintenance complex-binding protein	Mcmbp	sp|Q8R3C0|MCMBP_MOUSE Mini-chromosome maintenance complex-binding protein OS=Mus musculus GN=Mcmbp PE=1 SV=1	1	8	13.9	72.89	642	0	13.596	4405200	887710	601200	772460	882240	872980	0.291841	-1.14014	-1.43198	3332
Q8CHE4	PH domain leucine-rich repeat-containing protein phosphatase 1	Phlpp1	sp|Q8CHE4|PHLP1_MOUSE PH domain leucine-rich repeat-containing protein phosphatase 1 OS=Mus musculus GN=Phlpp1 PE=1 SV=2	1	3	2.4	182.36	1687	0.0061637	2.119	262230	34367	53643	44221	71226	38317	0.291446	-5.22922	-5.52067	3098
Q9JK91	DNA mismatch repair protein Mlh1	Mlh1	sp|Q9JK91|MLH1_MOUSE DNA mismatch repair protein Mlh1 OS=Mus musculus GN=Mlh1 PE=1 SV=2	1	2	3.7	84.669	760	0.0027051	2.7048	397050	112380	68657	0	92739	96213	0.291149	-4.19687	-4.48802	4622
Q9D1A2	Cytosolic non-specific dipeptidase	Cndp2	sp|Q9D1A2|CNDP2_MOUSE Cytosolic non-specific dipeptidase OS=Mus musculus GN=Cndp2 PE=1 SV=1	1	15	34.1	52.767	475	0	67.241	34092000	7563200	3401200	6004000	5509000	5981800	0.288857	1.65236	1.3635	4129
O70209	PDZ and LIM domain protein 3	Pdlim3	sp|O70209|PDLI3_MOUSE PDZ and LIM domain protein 3 OS=Mus musculus GN=Pdlim3 PE=1 SV=1	1	7	33.2	34.299	316	0	18.031	11037000	2090300	1537300	1591500	2440200	2248400	0.288654	0.151688	-0.136966	597
P49586	Choline-phosphate cytidylyltransferase A	Pcyt1a	sp|P49586|PCY1A_MOUSE Choline-phosphate cytidylyltransferase A OS=Mus musculus GN=Pcyt1a PE=1 SV=1	1	13	43.9	41.666	367	0	156.05	121700000	23659000	17188000	18673000	33304000	19986000	0.288597	3.6434	3.3548	1100
Q3V063		4933416C03Rik	tr|Q3V063|Q3V063_MOUSE MCG64776 OS=Mus musculus GN=4933416C03Rik PE=1 SV=1	1	12	30.4	42.837	378	0	52.33	74708000	11188000	14285000	13538000	17788000	12704000	0.28812	2.96925	2.68113	1803
S4R1M9	Oxysterol-binding protein	Osbpl10	sp|S4R1M9|OSB10_MOUSE Oxysterol-binding protein-related protein 10 OS=Mus musculus GN=Osbpl10 PE=1 SV=1	1	7	10.3	83.855	766	0	18.888	3393700	965140	320560	592430	786650	558700	0.28776	-1.53752	-1.82528	5058
Q8CIB5	Fermitin family homolog 2	Fermt2	sp|Q8CIB5|FERM2_MOUSE Fermitin family homolog 2 OS=Mus musculus GN=Fermt2 PE=1 SV=1	1	3	5.9	77.8	680	0.00072586	3.6222	606710	82568	0	102780	167750	99402	0.287226	-3.95326	-4.24049	3124
Q99LG4	Tetratricopeptide repeat protein 5	Ttc5	sp|Q99LG4|TTC5_MOUSE Tetratricopeptide repeat protein 5 OS=Mus musculus GN=Ttc5 PE=1 SV=2	1	6	15.7	48.795	440	0	7.5448	3203200	480030	516190	408910	708010	643340	0.286811	-1.69862	-1.98544	3769
Q9WUP7	Ubiquitin carboxyl-terminal hydrolase isozyme L5	Uchl5	sp|Q9WUP7|UCHL5_MOUSE Ubiquitin carboxyl-terminal hydrolase isozyme L5 OS=Mus musculus GN=Uchl5 PE=1 SV=2	1	10	32.8	37.616	329	0	53.574	34760000	4943400	5647000	6323700	7545300	4666800	0.286713	1.70919	1.42247	4832
L7N1Y0		Dnah7b	tr|L7N1Y0|L7N1Y0_MOUSE Protein Dnah7b OS=Mus musculus GN=Dnah7b PE=1 SV=1	1	72	18	466.69	4068	0	6.5079	546960	147850	46265	90386	107170	88167	0.286677	-4.28821	-4.57488	433
Q3UE37	Ubiquitin-conjugating enzyme E2 Z	Ube2z	sp|Q3UE37|UBE2Z_MOUSE Ubiquitin-conjugating enzyme E2 Z OS=Mus musculus GN=Ube2z PE=1 SV=2	1	5	12.4	38.368	356	0	10.649	12219000	3311300	1182300	1963400	3206700	1856800	0.286537	0.292013	0.005476	1715
P46061	Ran GTPase-activating protein 1	Rangap1	sp|P46061|RAGP1_MOUSE Ran GTPase-activating protein 1 OS=Mus musculus GN=Rangap1 PE=1 SV=2	1	20	34.8	63.53	589	0	81.669	29608000	7549700	2998700	4581000	5881800	6027200	0.286037	1.55739	1.27136	1045
Q8BJ37	Tyrosyl-DNA phosphodiesterase 1	Tdp1	sp|Q8BJ37|TYDP1_MOUSE Tyrosyl-DNA phosphodiesterase 1 OS=Mus musculus GN=Tdp1 PE=1 SV=2	1	4	8.4	68.689	609	0	7.1067	1424000	155260	290450	279540	208900	247200	0.285974	-2.92849	-3.21446	2718
Q8C437	PEX5-related protein	Pex5l	sp|Q8C437|PEX5R_MOUSE PEX5-related protein OS=Mus musculus GN=Pex5l PE=1 SV=2	1	4	7.6	63.134	567	0	17.304	5768000	1323600	614530	1163200	1063300	893240	0.285524	-0.842485	-1.12801	2957
Q9WTL7	Acyl-protein thioesterase 2	Lypla2	sp|Q9WTL7|LYPA2_MOUSE Acyl-protein thioesterase 2 OS=Mus musculus GN=Lypla2 PE=1 SV=1	1	3	10.4	24.794	231	0.00472	2.2038	8422800	2055800	674180	1091500	2165200	1039700	0.285487	-0.458081	-0.743568	4800
P01942	Hemoglobin subunit alpha	Hba	sp|P01942|HBA_MOUSE Hemoglobin subunit alpha OS=Mus musculus GN=Hba PE=1 SV=2	1	7	62.7	15.085	142	0	291.21	2004100000	246980000	437800000	323570000	415840000	397260000	0.284676	7.66685	7.38217	717
Q8R1T1	Charged multivesicular body protein 7	Chmp7	sp|Q8R1T1|CHMP7_MOUSE Charged multivesicular body protein 7 OS=Mus musculus GN=Chmp7 PE=1 SV=1	1	8	20.8	50.632	451	0	52.82	21128000	3571600	3502600	4323800	4442300	3459700	0.2842	1.12768	0.843477	3306
Q9D6L8	Peptidyl-prolyl cis-trans isomerase-like 3	Ppil3	sp|Q9D6L8|PPIL3_MOUSE Peptidyl-prolyl cis-trans isomerase-like 3 OS=Mus musculus GN=Ppil3 PE=1 SV=1	1	6	48.4	18.127	161	0	73.485	41133000	3663600	10008000	5842500	12253000	4651100	0.283515	1.90267	1.61915	4248
Q922Y1	UBX domain-containing protein 1	Ubxn1	sp|Q922Y1|UBXN1_MOUSE UBX domain-containing protein 1 OS=Mus musculus GN=Ubxn1 PE=1 SV=1	1	13	52.2	33.572	297	0	113.84	106520000	20363000	13996000	15855000	23339000	19495000	0.283392	3.38178	3.09839	3670
Q7TSH4	Centriolar coiled-coil protein of 110 kDa	Ccp110	sp|Q7TSH4|CP110_MOUSE Centriolar coiled-coil protein of 110 kDa OS=Mus musculus GN=Ccp110 PE=1 SV=1	1	14	17.8	111.14	1004	0	32.139	8904100	1611100	1325800	1514500	1870100	1651800	0.283157	-0.148409	-0.431565	2480
Q9JHJ7	Testisin	Prss21	sp|Q9JHJ7|TEST_MOUSE Testisin OS=Mus musculus GN=Prss21 PE=1 SV=2	1	3	10.8	36.175	324	0	12.598	13334000	2860600	1716100	2622000	1892600	3284600	0.283139	0.451844	0.168705	4562
H3BJD6		Ppp1r9a	tr|H3BJD6|H3BJD6_MOUSE Protein Ppp1r9a OS=Mus musculus GN=Ppp1r9a PE=1 SV=1	1	8	6.8	144.4	1292	0	8.5635	2467700	334050	223920	239710	714590	178780	0.28262	-2.56681	-2.84943	420
P16563	Cysteine-rich secretory protein 2	Crisp2	sp|P16563|CRIS2_MOUSE Cysteine-rich secretory protein 2 OS=Mus musculus GN=Crisp2 PE=1 SV=1	1	1	4.5	27.605	243	0.0039199	2.35	8262200	685480	2350500	1119500	1863100	1467600	0.282543	-0.352401	-0.634944	841
Q6ZPR6	Inhibitor of Bruton tyrosine kinase	Ibtk	sp|Q6ZPR6|IBTK_MOUSE Inhibitor of Bruton tyrosine kinase OS=Mus musculus GN=Ibtk PE=1 SV=3	1	3	2.4	149.57	1352	0.00073099	3.7315	221470	47001	26280	14767	73816	59606	0.282541	-5.52701	-5.80955	2385
Q80VT5		2610318N02Rik	tr|Q80VT5|Q80VT5_MOUSE MCG131172, isoform CRA_a OS=Mus musculus GN=2610318N02Rik PE=2 SV=1	1	3	15.7	34.041	305	0.0009348	3.1347	2058800	234120	355760	191090	488240	385030	0.281808	-2.49006	-2.77187	2545
Q3TCJ1	BRISC complex subunit Abro1	Fam175b	sp|Q3TCJ1|F175B_MOUSE BRISC complex subunit Abro1 OS=Mus musculus GN=Fam175b PE=1 SV=1	1	4	13.3	46.942	415	0	12.086	4142500	552830	837490	964010	735960	663390	0.28167	-1.25282	-1.53449	1624
Q9Z0H7	B-cell lymphoma/leukemia 10	Bcl10	sp|Q9Z0H7|BCL10_MOUSE B-cell lymphoma/leukemia 10 OS=Mus musculus GN=Bcl10 PE=1 SV=1	1	2	8.6	25.948	233	0.00051573	4.6507	2114900	780900	86527	152140	278630	618740	0.281461	-2.64131	-2.92277	4872
Q6PCL9	Poly(A) polymerase gamma	Papolg	sp|Q6PCL9|PAPOG_MOUSE Poly(A) polymerase gamma OS=Mus musculus GN=Papolg PE=1 SV=1	1	8	12.6	82.956	739	0.00050659	4.3956	2017600	287920	399570	424230	480930	285000	0.280432	-2.25846	-2.53889	2311
Q6K1E7	Gametogenetin-binding protein 1	Ggnbp1	sp|Q6K1E7|GGNB1_MOUSE Gametogenetin-binding protein 1 OS=Mus musculus GN=Ggnbp1 PE=1 SV=2	1	5	18.1	40.504	370	0	9.0593	6112200	1965400	433970	752480	1731000	899560	0.279576	-0.8142	-1.09378	2224
Q9DAN6	Gametocyte-specific factor 1	Gtsf1	sp|Q9DAN6|GTSF1_MOUSE Gametocyte-specific factor 1 OS=Mus musculus GN=Gtsf1 PE=1 SV=1	1	7	42.5	19.083	167	0	53.258	55611000	7616500	10586000	7144600	16054000	9384000	0.279312	2.4669	2.18759	4387
P97470	Serine/threonine-protein phosphatase 4 catalytic subunit	Ppp4c	sp|P97470|PP4C_MOUSE Serine/threonine-protein phosphatase 4 catalytic subunit OS=Mus musculus GN=Ppp4c PE=1 SV=2	1	8	31.3	35.08	307	0	77.652	56087000	6792100	11000000	9013000	11995000	8876600	0.279094	2.41172	2.13262	1476
P67871	Casein kinase II subunit beta	Csnk2b	sp|P67871|CSK2B_MOUSE Casein kinase II subunit beta OS=Mus musculus GN=Csnk2b PE=1 SV=1	1	6	31.2	24.942	215	0	66.753	124250000	10421000	33957000	19543000	29289000	17245000	0.278075	3.53258	3.25451	1374
Q9CZ15	DNA replication complex GINS protein PSF1	Gins1	sp|Q9CZ15|PSF1_MOUSE DNA replication complex GINS protein PSF1 OS=Mus musculus GN=Gins1 PE=1 SV=1	1	2	14.8	22.893	196	0	13.625	1378800	116490	351240	135190	632650	143200	0.27709	-3.00753	-3.28462	4064
O55082	Tyrosine-protein phosphatase non-receptor type 20	Ptpn20	sp|O55082|PTN20_MOUSE Tyrosine-protein phosphatase non-receptor type 20 OS=Mus musculus GN=Ptpn20 PE=1 SV=1	1	9	21.1	49.118	426	0	12.843	10733000	1304000	2273600	2368600	1584100	2010700	0.276451	0.0813913	-0.19506	575
Q6ZQ88	Lysine-specific histone demethylase 1A	Kdm1a	sp|Q6ZQ88|KDM1A_MOUSE Lysine-specific histone demethylase 1A OS=Mus musculus GN=Kdm1a PE=1 SV=2	1	17	23.1	92.849	853	0	47.707	10931000	1694600	1620300	1501100	1969200	2270300	0.275516	0.0250972	-0.250419	2395
Q9WVQ5	Methylthioribulose-1-phosphate dehydratase	Apip	sp|Q9WVQ5|MTNB_MOUSE Methylthioribulose-1-phosphate dehydratase OS=Mus musculus GN=Apip PE=1 SV=1	1	1	5.8	26.949	241	0.0031243	2.5976	3206000	242810	657810	310420	629740	481270	0.275139	-2.02706	-2.3022	4862
Q99NF3	Centrosomal protein of 41 kDa	Cep41	sp|Q99NF3|CEP41_MOUSE Centrosomal protein of 41 kDa OS=Mus musculus GN=Cep41 PE=1 SV=1	1	4	13.4	41.441	373	0	9.4153	8363000	1222200	1755600	1493000	1886700	1639500	0.27367	-0.154629	-0.428299	3811
Q8K2Q9	Shootin-1	Kiaa1598	sp|Q8K2Q9|SHOT1_MOUSE Shootin-1 OS=Mus musculus GN=Shtn1 PE=1 SV=1	1	4	7.4	71.342	631	0.00026518	5.1387	1249000	59777	496570	275970	158220	172050	0.27354	-3.24258	-3.51612	3214
G3UYX5	Regulator of G-protein signaling 22	Rgs22	sp|G3UYX5|RGS22_MOUSE Regulator of G-protein signaling 22 OS=Mus musculus GN=Rgs22 PE=1 SV=1	1	8	5.9	145.88	1258	0	7.8072	1777200	308630	247920	593130	292800	179000	0.273477	-2.55959	-2.83307	400
A0AUP1	Coiled-coil domain-containing protein 112	Ccdc112	sp|A0AUP1|CC112_MOUSE Coiled-coil domain-containing protein 112 OS=Mus musculus GN=Ccdc112 PE=2 SV=2	1	2	5	52.776	442	0.0076158	2.0659	568120	82151	108710	121530	206330	49399	0.273136	-4.1094	-4.38253	46
Q6P8X1	Sorting nexin-6;Sorting nexin-6, N-terminally processed	Snx6	sp|Q6P8X1|SNX6_MOUSE Sorting nexin-6 OS=Mus musculus GN=Snx6 PE=1 SV=2	1	10	23.4	46.648	406	0	14.058	17015000	2882000	3096200	4146100	2687500	3508500	0.272787	0.872551	0.599764	2290
Q9EQH3	Vacuolar protein sorting-associated protein 35	Vps35	sp|Q9EQH3|VPS35_MOUSE Vacuolar protein sorting-associated protein 35 OS=Mus musculus GN=Vps35 PE=1 SV=1	1	28	39.1	91.712	796	0	323.31	82653000	14548000	12416000	14459000	19154000	12837000	0.272077	3.04149	2.76942	4503
Q6ZWM4	U6 snRNA-associated Sm-like protein LSm8	Lsm8	sp|Q6ZWM4|LSM8_MOUSE U6 snRNA-associated Sm-like protein LSm8 OS=Mus musculus GN=Lsm8 PE=1 SV=3	1	4	46.9	10.403	96	0	16.822	50971000	3091800	15384000	7963900	11913000	5062000	0.271926	2.07881	1.80688	2401
P17710;Q91W97;Q3TRM8	Hexokinase-1	Hk1	sp|P17710|HXK1_MOUSE Hexokinase-1 OS=Mus musculus GN=Hk1 PE=1 SV=3	3	32	31.7	108.3	974	0	125.27	47469000	7345100	7842100	7923100	8937100	9026400	0.271275	2.21627	1.94499	852
Q921N8		Gps2	tr|Q921N8|Q921N8_MOUSE G protein pathway suppressor 2 OS=Mus musculus GN=Gps2 PE=1 SV=1	1	2	5.8	36.737	327	0.0030817	2.4635	3888400	556330	720670	689660	974870	550860	0.270234	-1.36808	-1.63831	3638
Q922X9	Protein arginine N-methyltransferase 7	Prmt7	sp|Q922X9|ANM7_MOUSE Protein arginine N-methyltransferase 7 OS=Mus musculus GN=Prmt7 PE=1 SV=1	1	10	18.1	78.3	692	0	32.529	11956000	1604000	1810300	1896500	2403800	1581000	0.269492	0.0594238	-0.210069	3669
O08807	Peroxiredoxin-4	Prdx4	sp|O08807|PRDX4_MOUSE Peroxiredoxin-4 OS=Mus musculus GN=Prdx4 PE=1 SV=1	1	12	49.3	31.052	274	0	114.61	380910000	43965000	80462000	61517000	83201000	59771000	0.268625	5.18386	4.91524	459
Q99KY4;Q80TZ3	Cyclin-G-associated kinase	Gak	sp|Q99KY4|GAK_MOUSE Cyclin-G-associated kinase OS=Mus musculus GN=Gak PE=1 SV=2	2	22	18.2	143.64	1305	0	32.94	15604000	3022300	2100400	2800800	3953500	2097600	0.268027	0.622163	0.354136	3750
Q9JJZ4	Ubiquitin-conjugating enzyme E2 J1	Ube2j1	sp|Q9JJZ4|UB2J1_MOUSE Ubiquitin-conjugating enzyme E2 J1 OS=Mus musculus GN=Ube2j1 PE=1 SV=2	1	4	18.2	34.989	318	0	61.437	11509000	2811900	1420600	2365500	2456100	1991400	0.267023	0.287025	0.0200024	4614
Q0P557	Mitochondria-eating protein	Spata18	sp|Q0P557|MIEAP_MOUSE Mitochondria-eating protein OS=Mus musculus GN=Spata18 PE=1 SV=2	1	8	14.3	60.397	537	0	6.796	7828000	1068100	1458300	1806300	1418800	1097200	0.266124	-0.393229	-0.659353	1575
Q9CQD0		Rpl39l	tr|Q9CQD0|Q9CQD0_MOUSE Protein Rpl39l OS=Mus musculus GN=Rpl39l PE=1 SV=1	1	2	23.5	6.3376	51	0	26.582	578030000	52753000	160200000	88674000	146940000	86138000	0.265524	5.80896	5.54344	3896
Q9DCJ1	Target of rapamycin complex subunit LST8	Mlst8	sp|Q9DCJ1|LST8_MOUSE Target of rapamycin complex subunit LST8 OS=Mus musculus GN=Mlst8 PE=1 SV=1	1	4	16.3	35.851	326	0	21.401	11113000	1808700	1865500	2001900	2589200	1725900	0.265097	0.163334	-0.101763	4464
Q5SW19	Clustered mitochondria protein homolog	Cluh	sp|Q5SW19|CLU_MOUSE Clustered mitochondria protein homolog OS=Mus musculus GN=Cluh PE=1 SV=2	1	14	11.3	148.07	1315	0	17.957	3705400	554460	608580	736040	588760	652500	0.264828	-1.49786	-1.76268	1921
O35864	COP9 signalosome complex subunit 5	Cops5	sp|O35864|CSN5_MOUSE COP9 signalosome complex subunit 5 OS=Mus musculus GN=Cops5 PE=1 SV=3	1	12	34.4	37.548	334	0	198.93	73927000	11712000	12304000	12512000	15679000	12693000	0.263783	2.87025	2.60646	537
O09117	Synaptophysin-like protein 1	Sypl1	sp|O09117|SYPL1_MOUSE Synaptophysin-like protein 1 OS=Mus musculus GN=Sypl1 PE=1 SV=2	1	4	20.3	28.899	261	0	185.77	60622000	14194000	7618700	11876000	11362000	11994000	0.263691	2.66305	2.39936	477
Q9JIQ3	Diablo homolog, mitochondrial	Diablo	sp|Q9JIQ3|DBLOH_MOUSE Diablo homolog, mitochondrial OS=Mus musculus GN=Diablo PE=1 SV=2	1	2	9.7	26.82	237	0	19.055	4729100	635780	848980	657020	1255200	689740	0.262096	-1.16172	-1.42382	4589
E9Q6E5		Srsf11	tr|E9Q6E5|E9Q6E5_MOUSE Protein Srsf11 OS=Mus musculus GN=Srsf11 PE=1 SV=1	1	4	12.9	56.697	511	0	9.2909	7450100	326460	3079300	772560	1728600	1082200	0.26192	-0.713311	-0.97523	336
P06151	L-lactate dehydrogenase A chain	Ldha	sp|P06151|LDHA_MOUSE L-lactate dehydrogenase A chain OS=Mus musculus GN=Ldha PE=1 SV=3	1	17	41	36.498	332	0	256.71	527500000	72544000	94783000	92302000	101330000	87364000	0.261668	5.65632	5.39465	732
Q91YI0	Argininosuccinate lyase	Asl	sp|Q91YI0|ARLY_MOUSE Argininosuccinate lyase OS=Mus musculus GN=Asl PE=1 SV=1	1	17	34.5	51.739	464	0	78.754	48854000	7620600	8393500	10196000	9017000	7970500	0.261441	2.28201	2.02057	3580
Q8BH57	WD repeat-containing protein 48	Wdr48	sp|Q8BH57|WDR48_MOUSE WD repeat-containing protein 48 OS=Mus musculus GN=Wdr48 PE=1 SV=1	1	8	13.9	76.006	676	0	13.388	4801100	665890	877510	689890	1022700	902360	0.259057	-1.10754	-1.3666	2677
P35293	Ras-related protein Rab-18	Rab18	sp|P35293|RAB18_MOUSE Ras-related protein Rab-18 OS=Mus musculus GN=Rab18 PE=1 SV=2	1	9	44.2	23.035	206	0	101.57	135760000	26252000	20071000	22367000	35174000	21898000	0.258737	3.80041	3.54168	993
Q8C0P7	Zinc finger protein 451	Znf451	sp|Q8C0P7|ZN451_MOUSE E3 SUMO-protein ligase ZNF451 OS=Mus musculus GN=Znf451 PE=1 SV=1	1	6	6.7	120.07	1056	0	9.1714	1210900	166760	245480	225300	175310	298340	0.258161	-3.0261	-3.28426	2925
Q07797	Galectin-3-binding protein	Lgals3bp	sp|Q07797|LG3BP_MOUSE Galectin-3-binding protein OS=Mus musculus GN=Lgals3bp PE=1 SV=1	1	1	3.1	64.49	577	0.00050391	4.31	1125800	247010	107750	0	451280	164410	0.258119	-3.3367	-3.59482	1561
Q8BZ36	RAD50-interacting protein 1	Rint1	sp|Q8BZ36|RINT1_MOUSE RAD50-interacting protein 1 OS=Mus musculus GN=Rint1 PE=1 SV=2	1	3	3.8	90.093	792	0.0076094	2.057	610600	305590	0	87464	107470	110070	0.257881	-4.19596	-4.45384	2896
Q9D9C7	Uncharacterized protein C3orf62 homolog		sp|Q9D9C7|CC062_MOUSE Uncharacterized protein C3orf62 homolog OS=Mus musculus PE=1 SV=1	1	7	31.7	28.535	252	0	23.193	23215000	3956600	3564900	3735300	5750600	3491200	0.255771	1.18581	0.930041	4321
Q9QY05	Insulin-like peptide INSL6;Insulin-like peptide INSL6 B chain;Insulin-like peptide INSL6 A chain	Insl6	sp|Q9QY05|INSL6_MOUSE Insulin-like peptide INSL6 OS=Mus musculus GN=Insl6 PE=2 SV=1	1	7	38.2	22.214	191	0	22.925	42263000	4301100	10804000	7219100	10629000	5843200	0.255684	2.04576	1.79008	4698
Q8BMK4	Cytoskeleton-associated protein 4	Ckap4	sp|Q8BMK4|CKAP4_MOUSE Cytoskeleton-associated protein 4 OS=Mus musculus GN=Ckap4 PE=1 SV=2	1	27	49.9	63.691	575	0	180.88	51349000	10686000	7164500	8165200	11866000	9785500	0.255654	2.40589	2.15024	2768
Q9DC16	Endoplasmic reticulum-Golgi intermediate compartment protein 1	Ergic1	sp|Q9DC16|ERGI1_MOUSE Endoplasmic reticulum-Golgi intermediate compartment protein 1 OS=Mus musculus GN=Ergic1 PE=1 SV=1	1	7	24.8	32.562	290	0	18.822	18262000	3261100	2931200	4300500	2652200	3666000	0.255488	0.904893	0.649405	4450
O54879	High mobility group protein B3	Hmgb3	sp|O54879|HMGB3_MOUSE High mobility group protein B3 OS=Mus musculus GN=Hmgb3 PE=1 SV=3	1	2	13.5	23.01	200	0.00027732	5.9348	8758200	0	6209600	725760	760250	410410	0.255431	-1.60466	-1.86009	556
Q8C1Y8	Vacuolar fusion protein CCZ1 homolog	Ccz1	sp|Q8C1Y8|CCZ1_MOUSE Vacuolar fusion protein CCZ1 homolog OS=Mus musculus GN=Ccz1 PE=1 SV=1	1	5	11.2	55.504	480	0.00028217	6.3252	2817400	680170	306490	474100	697670	407070	0.255417	-1.85466	-2.11008	2944
Q925B0	PRKC apoptosis WT1 regulator protein	Pawr	sp|Q925B0|PAWR_MOUSE PRKC apoptosis WT1 regulator protein OS=Mus musculus GN=Pawr PE=1 SV=2	1	3	13.5	35.908	333	0	7.6814	2845300	624190	440170	704650	511730	564520	0.255028	-1.6559	-1.91093	3690
P14685	26S proteasome non-ATPase regulatory subunit 3	Psmd3	sp|P14685|PSMD3_MOUSE 26S proteasome non-ATPase regulatory subunit 3 OS=Mus musculus GN=Psmd3 PE=1 SV=3	1	27	48.5	60.718	530	0	215.39	78484000	14976000	10700000	15985000	12324000	14554000	0.255017	2.93806	2.68304	822
E9QA15;REV__Q8BSS9		Cald1	tr|E9QA15|E9QA15_MOUSE Protein Cald1 OS=Mus musculus GN=Cald1 PE=1 SV=1	2	21	26.7	89.272	768	0	92.558	42992000	5421300	9993300	7436100	8580200	8817300	0.254112	2.15489	1.90078	362
Q9CXW3	Calcyclin-binding protein	Cacybp	sp|Q9CXW3|CYBP_MOUSE Calcyclin-binding protein OS=Mus musculus GN=Cacybp PE=1 SV=1	1	15	73.8	26.51	229	0	167.2	178690000	22741000	34489000	29573000	45018000	23248000	0.253527	4.08215	3.82862	4034
Q99PG2	Opioid growth factor receptor	Ogfr	sp|Q99PG2|OGFR_MOUSE Opioid growth factor receptor OS=Mus musculus GN=Ogfr PE=1 SV=1	1	8	25	70.678	633	0	16.845	5402200	613740	575980	621100	493330	966330	0.253422	-1.4757	-1.72913	3822
Q9JHX6;CON__Q1A7A4	Probable allantoicase	Allc	sp|Q9JHX6|ALLC_MOUSE Probable allantoicase OS=Mus musculus GN=Allc PE=1 SV=2	2	13	38.2	46.293	414	0	203.74	120070000	19944000	21297000	23454000	25881000	20313000	0.253354	3.63956	3.38621	4572
Q5SQY2	Biorientation of chromosomes in cell division protein 1	Bod1	sp|Q5SQY2|BOD1_MOUSE Biorientation of chromosomes in cell division protein 1 OS=Mus musculus GN=Bod1 PE=3 SV=1	1	3	17.3	18.363	173	0.00049456	3.9913	10429000	1989200	1697300	2103700	2294900	1807700	0.252736	0.151431	-0.101305	1904
Q80UM3;Q9DBB4	N-alpha-acetyltransferase 15, NatA auxiliary subunit	Naa15	sp|Q80UM3|NAA15_MOUSE N-alpha-acetyltransferase 15, NatA auxiliary subunit OS=Mus musculus GN=Naa15 PE=1 SV=1	2	18	19.7	100.96	865	0	27.91	11689000	1417000	2373800	1883800	2173600	2116500	0.252065	0.148063	-0.104002	2521
O08529	Calpain-2 catalytic subunit	Capn2	sp|O08529|CAN2_MOUSE Calpain-2 catalytic subunit OS=Mus musculus GN=Capn2 PE=1 SV=4	1	6	9.1	79.871	700	0	7.3202	1095700	214870	140430	143290	291160	176390	0.251796	-3.2525	-3.50429	435
Q80UG5	Septin-9	Septin-9	sp|Q80UG5|SEPT9_MOUSE Septin-9 OS=Mus musculus GN=Sept9 PE=1 SV=1	1	18	29.5	65.574	583	0	169.45	34125000	5286700	5734600	6138500	7356000	5182400	0.251059	1.73307	1.48201	2517
P55258	Ras-related protein Rab-8A	Rab8a	sp|P55258|RAB8A_MOUSE Ras-related protein Rab-8A OS=Mus musculus GN=Rab8a PE=1 SV=2	1	9	40.1	23.668	207	0	90.48	80365000	7784900	18585000	12284000	18538000	10687000	0.249877	2.85923	2.60935	1171
Q9ESE1	Lipopolysaccharide-responsive and beige-like anchor protein	Lrba	sp|Q9ESE1|LRBA_MOUSE Lipopolysaccharide-responsive and beige-like anchor protein OS=Mus musculus GN=Lrba PE=1 SV=1	1	20	8.2	317.06	2856	0	73.595	2230400	363450	376660	390760	472780	383250	0.249682	-2.16376	-2.41344	4543
A0A0G2JE47			tr|A0A0G2JE47|A0A0G2JE47_MOUSE Protein Igkv8-28 (Fragment) OS=Mus musculus GN=Igkv8-28 PE=1 SV=3	1	4	29.5	13.182	122	0.00025981	4.7437	19383000	2545700	2863800	1593500	7082300	2435100	0.249083	0.703059	0.453976	35
Q61937;E9Q5T3	Nucleophosmin	Npm1;Gm5611	sp|Q61937|NPM_MOUSE Nucleophosmin OS=Mus musculus GN=Npm1 PE=1 SV=1;tr|E9Q5T3|E9Q5T3_MOUSE Protein Gm5611 OS=Mus musculus GN=Gm5611 PE=4 SV=2	2	10	37	32.56	292	0	294.02	363280000	36937000	88801000	61965000	86580000	48816000	0.248407	5.10913	4.86073	2065
O54946	DnaJ homolog subfamily B member 6	Dnajb6	sp|O54946|DNJB6_MOUSE DnaJ homolog subfamily B member 6 OS=Mus musculus GN=Dnajb6 PE=1 SV=4	1	12	35.9	39.807	365	0	96.018	119450000	16862000	23446000	18699000	27406000	21380000	0.248293	3.58276	3.33447	561
Q9CQX0	Ubiquitin thioesterase OTUB2	Otub2	sp|Q9CQX0|OTUB2_MOUSE Ubiquitin thioesterase OTUB2 OS=Mus musculus GN=Otub2 PE=1 SV=1	1	9	35.5	27.3	234	0	30.622	35679000	4130500	7094100	5835700	10827000	3493500	0.247526	1.70497	1.45745	3938
Q8CC70		9230110C19Rik	tr|Q8CC70|Q8CC70_MOUSE Protein 9230110C19Rik OS=Mus musculus GN=9230110C19Rik PE=1 SV=1	1	9	34.1	30.901	267	0	31.574	21864000	2557400	4673000	2933500	7248000	2701300	0.247053	1.05755	0.810493	3025
Q9D868	Peptidyl-prolyl cis-trans isomerase H	Ppih	sp|Q9D868|PPIH_MOUSE Peptidyl-prolyl cis-trans isomerase H OS=Mus musculus GN=Ppih PE=1 SV=1	1	4	16	20.463	188	0	10.908	51802000	4975100	14243000	8959000	12162000	7606700	0.246799	2.34123	2.09443	4283
P70268;Q8K045	Serine/threonine-protein kinase N1	Pkn1	sp|P70268|PKN1_MOUSE Serine/threonine-protein kinase N1 OS=Mus musculus GN=Pkn1 PE=1 SV=3	2	18	18	104.41	946	0	49.982	14719000	2422800	2131700	2407300	3861400	1754300	0.246752	0.452071	0.205319	1391
Q9DB16	Calcium-binding protein 39-like	Cab39l	sp|Q9DB16|CB39L_MOUSE Calcium-binding protein 39-like OS=Mus musculus GN=Cab39l PE=1 SV=3	1	11	31.8	39.105	337	0	43.501	15184000	2747200	2212000	2950600	2923100	2412600	0.246655	0.569291	0.322636	4400
Q9WUB0	RanBP-type and C3HC4-type zinc finger-containing protein 1	Rbck1	sp|Q9WUB0|HOIL1_MOUSE RanBP-type and C3HC4-type zinc finger-containing protein 1 OS=Mus musculus GN=Rbck1 PE=1 SV=2	1	2	5.9	57.534	508	0.00072115	3.5204	670900	77756	116140	99154	134190	89586	0.246623	-4.12788	-4.3745	4821
Q9D1H9	Microfibril-associated glycoprotein 4	Mfap4	sp|Q9D1H9|MFAP4_MOUSE Microfibril-associated glycoprotein 4 OS=Mus musculus GN=Mfap4 PE=1 SV=1	1	2	9.7	28.937	257	0	68.444	203950000	31541000	27771000	30925000	41451000	28081000	0.246468	4.15478	3.90831	4137
Q91ZX7	Prolow-density lipoprotein receptor-related protein 1;Low-density lipoprotein receptor-related protein 1 85 kDa subunit;Low-density lipoprotein receptor-related protein 1 515 kDa subunit;Low-density lipoprotein receptor-related protein 1 intracellular domain	Lrp1	sp|Q91ZX7|LRP1_MOUSE Prolow-density lipoprotein receptor-related protein 1 OS=Mus musculus GN=Lrp1 PE=1 SV=1	1	5	1.1	504.74	4545	0.00071463	3.3778	131900	25555	19494	26163	22271	26477	0.246107	-6.21845	-6.46456	3612
Q9D906	Ubiquitin-like modifier-activating enzyme ATG7	Atg7	sp|Q9D906|ATG7_MOUSE Ubiquitin-like modifier-activating enzyme ATG7 OS=Mus musculus GN=Atg7 PE=1 SV=1	1	10	13.9	77.519	698	0	7.5521	6954000	896430	861960	303620	3224000	962440	0.245954	-0.919088	-1.16504	4313
Q8BXA5	Cleft lip and palate transmembrane protein 1-like protein	Clptm1l	sp|Q8BXA5|CLP1L_MOUSE Cleft lip and palate transmembrane protein 1-like protein OS=Mus musculus GN=Clptm1l PE=1 SV=1	1	7	17.1	62.183	539	0	25.748	11877000	2930800	1531600	1987100	2546600	2605900	0.245787	0.349933	0.104146	2879
Q9JMA1	Ubiquitin carboxyl-terminal hydrolase 14	Usp14	sp|Q9JMA1|UBP14_MOUSE Ubiquitin carboxyl-terminal hydrolase 14 OS=Mus musculus GN=Usp14 PE=1 SV=3	1	9	19.9	56.001	493	0	51.195	11670000	1679200	1692300	1942300	2502000	1365600	0.245361	0.0197198	-0.225641	4655
Q8CI71	Coiled-coil domain-containing protein 132	Ccdc132	sp|Q8CI71|VPS50_MOUSE Syndetin OS=Mus musculus GN=Vps50 PE=1 SV=2	1	17	22	111.17	964	0	40.061	12183000	2414400	1795700	2496900	2402200	2082200	0.244708	0.323794	0.0790854	3120
Q91YN9	BAG family molecular chaperone regulator 2	Bag2	sp|Q91YN9|BAG2_MOUSE BAG family molecular chaperone regulator 2 OS=Mus musculus GN=Bag2 PE=1 SV=1	1	6	29	23.473	210	0	34.932	26054000	4028100	4840300	4699800	6320700	4003900	0.244045	1.40762	1.16358	3587
Q8R0F6	Integrin-linked kinase-associated serine/threonine phosphatase 2C	Ilkap	sp|Q8R0F6|ILKAP_MOUSE Integrin-linked kinase-associated serine/threonine phosphatase 2C OS=Mus musculus GN=Ilkap PE=1 SV=1	1	4	9.9	42.774	392	0.0002694	5.4304	2094400	417690	283660	500040	497900	226130	0.243666	-2.27398	-2.51765	3279
Q9R1T2	SUMO-activating enzyme subunit 1;SUMO-activating enzyme subunit 1, N-terminally processed	Sae1	sp|Q9R1T2|SAE1_MOUSE SUMO-activating enzyme subunit 1 OS=Mus musculus GN=Sae1 PE=1 SV=1	1	21	66.9	38.62	350	0	183.82	154790000	26376000	21876000	23814000	27098000	29559000	0.24219	3.84939	3.60719	4787
Q8BL99	Protein dopey-1	Dopey1	sp|Q8BL99|DOP1_MOUSE Protein dopey-1 OS=Mus musculus GN=Dopey1 PE=1 SV=2	1	5	2.5	269.25	2399	0	6.928	764900	124970	135730	185290	142840	114810	0.24193	-3.67786	-3.91979	2749
Q9ESK9	RB1-inducible coiled-coil protein 1	Rb1cc1	sp|Q9ESK9|RBCC1_MOUSE RB1-inducible coiled-coil protein 1 OS=Mus musculus GN=Rb1cc1 PE=1 SV=3	1	35	25.1	182.35	1588	0	86.065	11864000	2530800	1588300	2020000	2989000	1835400	0.241779	0.266297	0.024518	4547
Q99LD9	Translation initiation factor eIF-2B subunit beta	Eif2b2	sp|Q99LD9|EI2BB_MOUSE Translation initiation factor eIF-2B subunit beta OS=Mus musculus GN=Eif2b2 PE=1 SV=1	1	2	7.4	38.897	351	0.00072307	3.5561	1066100	206010	0	275960	311330	252320	0.241282	-2.73295	-2.97423	3764
Q8CI08	SLAIN motif-containing protein 2	Slain2	sp|Q8CI08|SLAI2_MOUSE SLAIN motif-containing protein 2 OS=Mus musculus GN=Slain2 PE=1 SV=2	1	7	16.7	62.377	581	0	17.046	7281900	1614700	1042900	1170300	1784900	1437000	0.241273	-0.361814	-0.603086	3113
A2RT91	Ankyrin and armadillo repeat-containing protein	Ankar	sp|A2RT91|ANKAR_MOUSE Ankyrin and armadillo repeat-containing protein OS=Mus musculus GN=Ankar PE=2 SV=1	1	3	2.5	165.29	1465	0.00051177	4.526	799840	116870	104080	55306	213160	156280	0.241174	-3.91848	-4.15965	113
A6H6A9	Rab GTPase-activating protein 1-like	Rabgap1l	sp|A6H6A9|RBG1L_MOUSE Rab GTPase-activating protein 1-like OS=Mus musculus GN=Rabgap1l PE=1 SV=1	1	16	19.8	92.403	815	0	28.258	11511000	2156500	1719500	2089100	2521100	1859700	0.240607	0.206927	-0.03368	130
Q68FM7		Arhgef11	tr|Q68FM7|Q68FM7_MOUSE Protein Arhgef11 OS=Mus musculus GN=Arhgef11 PE=1 SV=1	1	10	9	171.8	1552	0	14.782	1931500	324440	337490	316650	482990	324910	0.240523	-2.33403	-2.57455	2175
Q9D9Z5	DET1- and DDB1-associated protein 1	Dda1	sp|Q9D9Z5|DDA1_MOUSE DET1- and DDB1-associated protein 1 OS=Mus musculus GN=Dda1 PE=1 SV=1	1	2	27.5	11.753	102	0.00093545	3.1387	4757100	698650	861030	528570	1251500	964840	0.239286	-1.10635	-1.34563	4352
A2RSQ1;Q0Q237	Beta-galactosidase-1-like protein 3	Glb1l3	sp|A2RSQ1|GLBL3_MOUSE Beta-galactosidase-1-like protein 3 OS=Mus musculus GN=Glb1l3 PE=1 SV=1	2	13	21.1	73.921	649	0	29.223	25128000	5431200	3433700	4804100	4429900	5174900	0.23912	1.37062	1.1315	110
Q80TQ2	Ubiquitin carboxyl-terminal hydrolase CYLD	Cyld	sp|Q80TQ2|CYLD_MOUSE Ubiquitin carboxyl-terminal hydrolase CYLD OS=Mus musculus GN=Cyld PE=1 SV=2	1	3	3.9	106.58	952	0.00050013	4.1525	644850	70288	113970	79904	122070	100360	0.238355	-4.22259	-4.46095	2501
O35643	AP-1 complex subunit beta-1	Ap1b1	sp|O35643|AP1B1_MOUSE AP-1 complex subunit beta-1 OS=Mus musculus GN=Ap1b1 PE=1 SV=2	1	32	34.7	103.93	943	0	77.642	22623000	3754900	3535800	3930200	3952600	4249700	0.23813	1.12451	0.886385	525
Q8C129	Leucyl-cystinyl aminopeptidase	Lnpep	sp|Q8C129|LCAP_MOUSE Leucyl-cystinyl aminopeptidase OS=Mus musculus GN=Lnpep PE=1 SV=1	1	7	7.9	117.3	1025	0	11.211	1300900	263570	181150	279670	129600	392680	0.237976	-2.93529	-3.17326	2933
Q921H8;Q8VCH0	3-ketoacyl-CoA thiolase A, peroxisomal	Acaa1a	sp|Q921H8|THIKA_MOUSE 3-ketoacyl-CoA thiolase A, peroxisomal OS=Mus musculus GN=Acaa1a PE=1 SV=1	2	11	39.6	43.953	424	0	27.491	18315000	3736700	2150400	2110300	4065300	3618000	0.237429	0.761593	0.524164	3628
Q9D498	IQ domain-containing protein F3	Iqcf3	sp|Q9D498|IQCF3_MOUSE IQ domain-containing protein F3 OS=Mus musculus GN=Iqcf3 PE=2 SV=1	1	3	32.5	23.5	203	0	11.288	6111400	1302000	803650	820450	1698300	1045800	0.236991	-0.709346	-0.946337	4200
P61021	Ras-related protein Rab-5B	Rab5b	sp|P61021|RAB5B_MOUSE Ras-related protein Rab-5B OS=Mus musculus GN=Rab5b PE=1 SV=1	1	7	39.1	23.707	215	0	50.372	19090000	3802700	2325900	2385800	6804400	2205300	0.236845	0.830231	0.593386	1241
Q9DCE5	p21-activated protein kinase-interacting protein 1	Pak1ip1	sp|Q9DCE5|PK1IP_MOUSE p21-activated protein kinase-interacting protein 1 OS=Mus musculus GN=Pak1ip1 PE=1 SV=2	1	8	22.3	42.116	382	0	84.035	8080700	585220	2665500	847780	1768100	1768900	0.236824	-0.421469	-0.658293	4460
Q8CHS8	Vacuolar protein sorting-associated protein 37A	Vps37a	sp|Q8CHS8|VP37A_MOUSE Vacuolar protein sorting-associated protein 37A OS=Mus musculus GN=Vps37a PE=1 SV=1	1	11	27.2	44.418	397	0	42.404	33789000	6275600	4871400	4472900	6540700	7848700	0.235939	1.72396	1.48802	3106
Q3UZ24;B1AQP7		Apol7e;Apol7b	tr|Q3UZ24|Q3UZ24_MOUSE Protein Apol7e OS=Mus musculus GN=Apol7e PE=2 SV=1;tr|B1AQP7|B1AQP7_MOUSE Protein Apol7b OS=Mus musculus GN=Apol7b PE=4 SV=1	2	1	2.2	40.241	369	0.0077977	2.0226	7539800	1663600	840420	1279300	1307600	1339700	0.234929	-0.502346	-0.737275	141
Q8BKC5;Q8BIV3	Importin-5	Ipo5	sp|Q8BKC5|IPO5_MOUSE Importin-5 OS=Mus musculus GN=Ipo5 PE=1 SV=3	2	38	42.3	123.59	1097	0	323.31	250960000	41676000	39358000	45803000	46363000	42400000	0.234836	4.59568	4.36084	2734
P59328	WD repeat and HMG-box DNA-binding protein 1	Wdhd1	sp|P59328|WDHD1_MOUSE WD repeat and HMG-box DNA-binding protein 1 OS=Mus musculus GN=Wdhd1 PE=1 SV=2	1	27	30.3	124.25	1117	0	94.757	19374000	4082500	2775100	3155800	4229200	3870600	0.2346	1.00658	0.771976	1217
P40336	Vacuolar protein sorting-associated protein 26A	Vps26a	sp|P40336|VP26A_MOUSE Vacuolar protein sorting-associated protein 26A OS=Mus musculus GN=Vps26a PE=1 SV=1	1	14	44.3	38.113	327	0	149.81	77888000	12417000	14085000	14655000	16529000	12934000	0.234562	2.98071	2.74615	1020
P62082;F6SVV1	40S ribosomal protein S7	Rps7;Gm9493	sp|P62082|RS7_MOUSE 40S ribosomal protein S7 OS=Mus musculus GN=Rps7 PE=2 SV=1;tr|F6SVV1|F6SVV1_MOUSE Protein Gm9493 OS=Mus musculus GN=Gm9493 PE=4 SV=1	2	13	64.9	22.127	194	0	314.13	3766600000	412680000	917090000	637490000	938450000	527120000	0.234508	8.52039	8.28588	1279
Q14AW5	Putative methyltransferase NSUN7	Nsun7	sp|Q14AW5|NSUN7_MOUSE Putative methyltransferase NSUN7 OS=Mus musculus GN=Nsun7 PE=2 SV=2	1	4	6.8	81.967	724	0.00072272	3.5541	845470	168670	131040	130820	216440	157120	0.234314	-3.49453	-3.72884	1593
Q9EPL8	Importin-7	Ipo7	sp|Q9EPL8|IPO7_MOUSE Importin-7 OS=Mus musculus GN=Ipo7 PE=1 SV=2	1	9	10.7	119.49	1038	0	68.985	10692000	1775600	1521300	1394900	1763600	2443100	0.234274	-0.0279417	-0.262216	4487
O54833	Casein kinase II subunit alpha	Csnk2a2	sp|O54833|CSK22_MOUSE Casein kinase II subunit alpha OS=Mus musculus GN=Csnk2a2 PE=1 SV=1	1	13	43.1	41.215	350	0	56.919	40424000	3850900	9116400	7593400	8346200	4441800	0.234119	1.82193	1.58781	553
O09130	NFATC2-interacting protein	Nfatc2ip	sp|O09130|NF2IP_MOUSE NFATC2-interacting protein OS=Mus musculus GN=Nfatc2ip PE=1 SV=1	1	9	33.7	45.121	412	0	103.43	72387000	9967300	14975000	16919000	14269000	10217000	0.233864	2.86569	2.63182	478
Q0KL02	Triple functional domain protein	Trio	sp|Q0KL02|TRIO_MOUSE Triple functional domain protein OS=Mus musculus GN=Trio PE=1 SV=3	1	6	2.3	347.86	3102	0.00028082	6.2083	420310	57980	80140	157700	58046	46756	0.233394	-4.62044	-4.85384	1574
P08752;B2RSH2;Q9DC51;P20612;Q3V3I2;P50149;Q8CGK7;Q6R0H7	Guanine nucleotide-binding protein G(i) subunit alpha-2;Guanine nucleotide-binding protein G(i) subunit alpha-1;Guanine nucleotide-binding protein G(k) subunit alpha	Gnai2;Gnai1;Gnai3	sp|P08752|GNAI2_MOUSE Guanine nucleotide-binding protein G(i) subunit alpha-2 OS=Mus musculus GN=Gnai2 PE=1 SV=5;sp|B2RSH2|GNAI1_MOUSE Guanine nucleotide-binding protein G(i) subunit alpha-1 OS=Mus musculus GN=Gnai1 PE=1 SV=1;sp|Q9DC51|GNAI3_MOUSE Guanine	8	6	19.7	40.489	355	0	12.632	11656000	2970600	1131100	1477900	2080700	2705900	0.233282	0.128502	-0.10478	756
Q6QD59	Vesicle transport protein SEC20	Bnip1	sp|Q6QD59|SEC20_MOUSE Vesicle transport protein SEC20 OS=Mus musculus GN=Bnip1 PE=1 SV=1	1	5	21.5	26.175	228	0	11.054	14854000	3886500	1602300	2426600	4261900	2028300	0.232873	0.57316	0.340287	2356
Q8VDS4	Regulation of nuclear pre-mRNA domain-containing protein 1A	Rprd1a	sp|Q8VDS4|RPR1A_MOUSE Regulation of nuclear pre-mRNA domain-containing protein 1A OS=Mus musculus GN=Rprd1a PE=1 SV=1	1	10	34.6	35.7	312	0	56.829	16713000	2637400	3434600	2819700	4375100	2981200	0.232568	0.843176	0.610608	3433
P70122	Ribosome maturation protein SBDS	Sbds	sp|P70122|SBDS_MOUSE Ribosome maturation protein SBDS OS=Mus musculus GN=Sbds PE=1 SV=4	1	18	61.2	28.78	250	0	187.69	492830000	76362000	81545000	77687000	116430000	73248000	0.232338	5.55547	5.32313	1384
Q9Z2W1;Q99JT2;Q99KH8	Serine/threonine-protein kinase 25;Serine/threonine-protein kinase 26	Stk25;Stk26	sp|Q9Z2W1|STK25_MOUSE Serine/threonine-protein kinase 25 OS=Mus musculus GN=Stk25 PE=1 SV=2;sp|Q99JT2|STK26_MOUSE Serine/threonine-protein kinase 26 OS=Mus musculus GN=Stk26 PE=1 SV=1	3	8	16.7	48.157	426	0	35.362	12142000	2144200	1933800	2435500	1852200	2522900	0.232188	0.279106	0.0469179	4943
Q8BPA8	Protein DPCD	Dpcd	sp|Q8BPA8|DPCD_MOUSE Protein DPCD OS=Mus musculus GN=Dpcd PE=1 SV=1	1	7	32.5	23.034	203	0	27.848	36071000	5321100	6948500	5407900	9169700	6106300	0.231814	1.85701	1.62519	2788
Q9D7A8	Armadillo repeat-containing protein 1	Armc1	sp|Q9D7A8|ARMC1_MOUSE Armadillo repeat-containing protein 1 OS=Mus musculus GN=Armc1 PE=1 SV=1	1	3	12.4	31.246	282	0.00094899	3.3265	1824900	337890	335780	369590	507190	274490	0.231647	-2.31727	-2.54891	4263
Q921T2	Torsin-1A-interacting protein 1	Tor1aip1	sp|Q921T2|TOIP1_MOUSE Torsin-1A-interacting protein 1 OS=Mus musculus GN=Tor1aip1 PE=1 SV=3	1	9	20.3	66.78	595	0	25.017	9376600	2571700	817700	1329800	1517900	2033200	0.231443	-0.211395	-0.442838	3641
Q6WKZ8	E3 ubiquitin-protein ligase UBR2	Ubr2	sp|Q6WKZ8|UBR2_MOUSE E3 ubiquitin-protein ligase UBR2 OS=Mus musculus GN=Ubr2 PE=1 SV=2	1	11	7.6	199.15	1755	0	14.263	2566800	313460	450970	395160	476630	379120	0.230611	-2.15968	-2.39029	2371
Q9D869	Calcineurin B homologous protein 2	Chp2	sp|Q9D869|CHP2_MOUSE Calcineurin B homologous protein 2 OS=Mus musculus GN=Chp2 PE=2 SV=4	1	2	12.8	22.566	196	0.0039224	2.3661	2012600	400840	211880	177490	507290	369310	0.230603	-2.52721	-2.75781	4284
Q9R061	Cytosolic Fe-S cluster assembly factor NUBP2	Nubp2	sp|Q9R061|NUBP2_MOUSE Cytosolic Fe-S cluster assembly factor NUBP2 OS=Mus musculus GN=Nubp2 PE=1 SV=1	1	6	23.3	29.518	275	0	43.581	60967000	12477000	7788600	7496600	18380000	9340500	0.230598	2.55286	2.32226	4752
Q9Z0U1	Tight junction protein ZO-2	Tjp2	sp|Q9Z0U1|ZO2_MOUSE Tight junction protein ZO-2 OS=Mus musculus GN=Tjp2 PE=1 SV=2	1	21	20.1	131.28	1167	0	36.863	8664900	1168700	1991500	1283600	2397600	1548600	0.23015	-0.13949	-0.36964	4881
Q3V0G7	GTPase-activating Rap/Ran-GAP domain-like protein 3	Garnl3	sp|Q3V0G7|GARL3_MOUSE GTPase-activating Rap/Ran-GAP domain-like protein 3 OS=Mus musculus GN=Garnl3 PE=1 SV=1	1	14	15.2	115.44	1038	0	21.293	7603000	1474300	1104100	1223500	1441700	1579100	0.229792	-0.397779	-0.62757	1808
O88531	Palmitoyl-protein thioesterase 1	Ppt1	sp|O88531|PPT1_MOUSE Palmitoyl-protein thioesterase 1 OS=Mus musculus GN=Ppt1 PE=1 SV=2	1	7	26.8	34.49	306	0	60.997	27030000	6168100	3162100	4123800	4902600	5712800	0.229665	1.3935	1.16383	644
Q99J38	Tetratricopeptide repeat protein 30A1	Ttc30a1	sp|Q99J38|T30A1_MOUSE Tetratricopeptide repeat protein 30A1 OS=Mus musculus GN=Ttc30a1 PE=1 SV=1	1	21	31.2	76.237	664	0	8.1677	3980500	1043000	417520	653670	750610	785320	0.229659	-1.34903	-1.57869	3699
O70251	Elongation factor 1-beta	Eef1b	sp|O70251|EF1B_MOUSE Elongation factor 1-beta OS=Mus musculus GN=Eef1b PE=1 SV=5	1	5	32.4	24.693	225	0	109.82	146890000	13605000	37681000	22323000	29409000	23648000	0.228462	3.75036	3.52189	599
Q9ERF3	WD repeat-containing protein 61;WD repeat-containing protein 61, N-terminally processed	Wdr61	sp|Q9ERF3|WDR61_MOUSE WD repeat-containing protein 61 OS=Mus musculus GN=Wdr61 PE=1 SV=1	1	10	39.7	33.772	305	0	45.476	47591000	5581600	10047000	8297700	10301000	6570000	0.228367	2.15403	1.92566	4523
Q9CWE0	Mitochondrial fission regulator 1-like	Mtfr1l	sp|Q9CWE0|MFR1L_MOUSE Mitochondrial fission regulator 1-like OS=Mus musculus GN=Mtfr1l PE=1 SV=1	1	1	4.2	31.726	289	0	14.249	1395200	239320	233150	275220	322200	198740	0.228322	-2.83253	-3.06085	3989
Q9ERI6	Retinol dehydrogenase 14	Rdh14	sp|Q9ERI6|RDH14_MOUSE Retinol dehydrogenase 14 OS=Mus musculus GN=Rdh14 PE=1 SV=1	1	3	11.7	36.365	334	0	7.0347	3033300	846150	309990	517410	586190	591450	0.22769	-1.71669	-1.94438	4527
P24788;Q64434	Cyclin-dependent kinase 11B	Cdk11b	sp|P24788|CD11B_MOUSE Cyclin-dependent kinase 11B OS=Mus musculus GN=Cdk11b PE=1 SV=2	2	16	20	91.512	784	0	19.876	9132100	1546400	1738500	1497500	2057300	1908400	0.227125	-0.0385173	-0.265642	912
O08579	Emerin	Emd	sp|O08579|EMD_MOUSE Emerin OS=Mus musculus GN=Emd PE=1 SV=1	1	8	42.1	29.435	259	0	10.746	8880400	1696100	1522000	2300900	2177100	1104100	0.22701	-0.0679153	-0.294926	439
Q62209	Synaptonemal complex protein 1	Sycp1	sp|Q62209|SYCP1_MOUSE Synaptonemal complex protein 1 OS=Mus musculus GN=Sycp1 PE=1 SV=2	1	36	37.2	115.93	993	0	80.6	22480000	3646700	4121700	3640700	6203600	3439900	0.226927	1.20282	0.975895	2088
Q9DBN9	Probable ATP-dependent RNA helicase DDX59	Ddx59	sp|Q9DBN9|DDX59_MOUSE Probable ATP-dependent RNA helicase DDX59 OS=Mus musculus GN=Ddx59 PE=1 SV=1	1	4	6.9	68.234	619	0.0016268	3.0366	594570	126640	80891	74488	130370	142020	0.225817	-4.05774	-4.28356	4435
Q922F4;CON__ENSEMBL:ENSBTAP00000025008;A2AQ07	Tubulin beta-6 chain	Tubb6	sp|Q922F4|TBB6_MOUSE Tubulin beta-6 chain OS=Mus musculus GN=Tubb6 PE=1 SV=1	3	19	47	50.09	447	0	103.79	38402000	5069000	7708900	7597700	8280300	5161300	0.225493	1.89059	1.66509	3650
E9Q4P1		Wdfy1	sp|E9Q4P1|WDFY1_MOUSE WD repeat and FYVE domain-containing protein 1 OS=Mus musculus GN=Wdfy1 PE=1 SV=1	1	8	19	46.217	410	0	12.757	6670100	716650	1360000	1106600	1407700	821010	0.225454	-0.772093	-0.997547	323
Q8CCF0	U4/U6 small nuclear ribonucleoprotein Prp31	Prpf31	sp|Q8CCF0|PRP31_MOUSE U4/U6 small nuclear ribonucleoprotein Prp31 OS=Mus musculus GN=Prpf31 PE=1 SV=3	1	11	27.5	55.429	499	0	42.809	63359000	8250700	14493000	12423000	15438000	9053200	0.224974	2.69685	2.47188	3027
Q8R2G4	Ecto-ADP-ribosyltransferase 3	Art3	sp|Q8R2G4|NAR3_MOUSE Ecto-ADP-ribosyltransferase 3 OS=Mus musculus GN=Art3 PE=1 SV=2	1	14	30.7	42.014	371	0	45.453	55930000	8332700	10603000	10813000	8536600	11943000	0.224838	2.47841	2.25357	3312
Q920D3	Mediator of RNA polymerase II transcription subunit 28	Med28	sp|Q920D3|MED28_MOUSE Mediator of RNA polymerase II transcription subunit 28 OS=Mus musculus GN=Med28 PE=1 SV=2	1	2	15.2	19.538	178	0	14.063	14589000	2037500	2926800	2683000	3461500	2079500	0.224378	0.533419	0.309041	3614
P24815	3 beta-hydroxysteroid dehydrogenase/Delta 5-->4-isomerase type 1;3-beta-hydroxy-Delta(5)-steroid dehydrogenase;Steroid Delta-isomerase	Hsd3b1	sp|P24815|3BHS1_MOUSE 3 beta-hydroxysteroid dehydrogenase/Delta 5-->4-isomerase type 1 OS=Mus musculus GN=Hsd3b1 PE=1 SV=3	1	8	27.9	42.062	373	0	49.097	47557000	10018000	5809100	9788400	7594000	7916800	0.224144	2.17654	1.9524	913
Q91YK0	Leucine-rich repeat-containing protein 49	Lrrc49	sp|Q91YK0|LRC49_MOUSE Leucine-rich repeat-containing protein 49 OS=Mus musculus GN=Lrrc49 PE=1 SV=1	1	6	8.9	78.875	686	0	12.335	6009000	1677100	642610	1167200	1000500	1269700	0.224041	-0.700987	-0.925028	3583
P47962	60S ribosomal protein L5	Rpl5	sp|P47962|RL5_MOUSE 60S ribosomal protein L5 OS=Mus musculus GN=Rpl5 PE=1 SV=3	1	17	43.8	34.4	297	0	199.22	1007200000	106080000	260800000	188950000	171560000	187920000	0.22351	6.62239	6.39888	1073
Q91ZR2	Sorting nexin-18	Snx18	sp|Q91ZR2|SNX18_MOUSE Sorting nexin-18 OS=Mus musculus GN=Snx18 PE=1 SV=1	1	6	11.6	67.903	614	0	22.362	6087800	903350	1144600	891810	1713100	910100	0.223018	-0.731903	-0.954921	3608
Q8C1Z7	Bardet-Biedl syndrome 4 protein homolog	Bbs4	sp|Q8C1Z7|BBS4_MOUSE Bardet-Biedl syndrome 4 protein homolog OS=Mus musculus GN=Bbs4 PE=1 SV=1	1	3	7.9	58.255	520	0.00026378	5.0416	3280800	400740	798740	593320	710420	568060	0.222926	-1.57783	-1.80075	2945
P61213	ADP-ribosylation factor-like protein 4A	Arl4a	sp|P61213|ARL4A_MOUSE ADP-ribosylation factor-like protein 4A OS=Mus musculus GN=Arl4a PE=2 SV=1	1	3	19.5	22.588	200	0.00072727	3.6633	3381500	402310	748680	449910	1160200	418260	0.222397	-1.62222	-1.84462	1255
Q149L6	DnaJ homolog subfamily B member 14	Dnajb14	sp|Q149L6|DJB14_MOUSE DnaJ homolog subfamily B member 14 OS=Mus musculus GN=Dnajb14 PE=2 SV=1	1	1	2.9	42.325	379	0.0043243	2.2753	344340	0	103140	86887	83906	70411	0.221074	-4.53302	-4.7541	1588
Q64324	Syntaxin-binding protein 2	Stxbp2	sp|Q64324|STXB2_MOUSE Syntaxin-binding protein 2 OS=Mus musculus GN=Stxbp2 PE=1 SV=1	1	9	16.5	66.357	593	0	12.508	4844000	1421300	416850	815690	978560	751990	0.220744	-1.13587	-1.35662	2140
Q9Z0P7	Suppressor of fused homolog	Sufu	sp|Q9Z0P7|SUFU_MOUSE Suppressor of fused homolog OS=Mus musculus GN=Sufu PE=1 SV=1	1	11	28.3	53.956	484	0	80.191	39108000	6197400	5554700	5879200	7310500	6174300	0.219882	1.79355	1.57367	4876
O70200	Allograft inflammatory factor 1	Aif1	sp|O70200|AIF1_MOUSE Allograft inflammatory factor 1 OS=Mus musculus GN=Aif1 PE=1 SV=1	1	3	15.6	16.91	147	0.00094832	3.3183	6031700	1531400	662530	842840	1364400	1166500	0.21942	-0.749146	-0.968567	596
Q8VE80	THO complex subunit 3	Thoc3	sp|Q8VE80|THOC3_MOUSE THO complex subunit 3 OS=Mus musculus GN=Thoc3 PE=2 SV=1	1	6	21.1	38.737	351	0	8.2916	7059100	1131900	1066400	999130	2209200	788350	0.219258	-0.624015	-0.843273	3448
Q8CHY3	Dymeclin	Dym	sp|Q8CHY3|DYM_MOUSE Dymeclin OS=Mus musculus GN=Dym PE=1 SV=1	1	7	9.1	75.847	669	0	9.1568	9287000	2052800	1130800	1165600	2243300	1774700	0.219235	-0.152317	-0.371552	3110
Q640L5	Coiled-coil domain-containing protein 18	Ccdc18	sp|Q640L5|CCD18_MOUSE Coiled-coil domain-containing protein 18 OS=Mus musculus GN=Ccdc18 PE=1 SV=1	1	16	12.8	169.74	1455	0	25.166	2748500	609580	357760	370900	542520	661700	0.217503	-1.86004	-2.07754	2132
Q8CFI2;A0A087WP01	Ubiquitin-conjugating enzyme E2 R1	Cdc34;Cdc34-ps	sp|Q8CFI2|UB2R1_MOUSE Ubiquitin-conjugating enzyme E2 R1 OS=Mus musculus GN=Cdc34 PE=1 SV=1;tr|A0A087WP01|A0A087WP01_MOUSE Ubiquitin-conjugating enzyme E2 R2 OS=Mus musculus GN=Cdc34b PE=3 SV=1	2	3	11.1	26.621	235	0	16.903	30827000	4012500	6847600	6111100	6455500	4770800	0.217295	1.62832	1.41103	3063
P11499	Heat shock protein HSP 90-beta	Hsp90ab1	sp|P11499|HS90B_MOUSE Heat shock protein HSP 90-beta OS=Mus musculus GN=Hsp90ab1 PE=1 SV=3	1	48	50.4	83.28	724	0	323.31	789530000	122650000	127230000	137480000	137820000	134420000	0.217206	6.20303	5.98583	796
P68040	Guanine nucleotide-binding protein subunit beta-2-like 1;Guanine nucleotide-binding protein subunit beta-2-like 1, N-terminally processed	Gnb2l1	sp|P68040|RACK1_MOUSE Receptor of activated protein C kinase 1 OS=Mus musculus GN=Rack1 PE=1 SV=3	1	18	58.4	35.076	317	0	304.2	335930000	36376000	76706000	53643000	78216000	45868000	0.216897	4.96097	4.74407	1377
Q9CQC8	Maspardin	Spg21	sp|Q9CQC8|SPG21_MOUSE Maspardin OS=Mus musculus GN=Spg21 PE=1 SV=1	1	5	20.5	34.952	308	0	8.6766	6864900	677260	1363500	834640	1508200	919620	0.216453	-0.820019	-1.03647	3894
Q9CWZ7	Gamma-soluble NSF attachment protein	Napg	sp|Q9CWZ7|SNAG_MOUSE Gamma-soluble NSF attachment protein OS=Mus musculus GN=Napg PE=1 SV=1	1	12	39.4	34.732	312	0	41.512	26767000	6294700	3425600	6216800	3961600	5302400	0.216333	1.45256	1.23623	4012
Q9R099	Transducin beta-like protein 2	Tbl2	sp|Q9R099|TBL2_MOUSE Transducin beta-like protein 2 OS=Mus musculus GN=Tbl2 PE=1 SV=2	1	15	41.2	49.583	442	0	126.74	36246000	8255000	4979000	7427400	6287700	7343300	0.215323	1.91687	1.70154	4753
Q9D3B1	Very-long-chain (3R)-3-hydroxyacyl-CoA dehydratase 2	Hacd2	sp|Q9D3B1|HACD2_MOUSE Very-long-chain (3R)-3-hydroxyacyl-CoA dehydratase 2 OS=Mus musculus GN=Hacd2 PE=1 SV=1	1	4	14.6	28.402	254	0	13.055	19665000	7626900	840580	3481100	1584600	3829800	0.215313	0.57657	0.361257	4178
Q9D3R9	Transcription initiation factor TFIID subunit 7-like	Taf7l	sp|Q9D3R9|TAF7L_MOUSE Transcription initiation factor TFIID subunit 7-like OS=Mus musculus GN=Taf7l PE=1 SV=2	1	8	21	52.905	471	0	14.247	12401000	1778800	2308500	1786800	3762000	1610900	0.215266	0.255175	0.0399094	4182
Q922Q1	Mitochondrial amidoxime reducing component 2	2002-03-01	sp|Q922Q1|MARC2_MOUSE Mitochondrial amidoxime reducing component 2 OS=Mus musculus GN=Marc2 PE=1 SV=1	1	6	14.8	38.194	338	0	10.459	8821300	2043200	1137400	1788100	1684500	1529200	0.214837	-0.155899	-0.370736	3659
B9EKI3	TATA element modulatory factor	Tmf1	sp|B9EKI3|TMF1_MOUSE TATA element modulatory factor OS=Mus musculus GN=Tmf1 PE=1 SV=2	1	10	10.2	121.8	1091	0	11.608	2636200	361650	332290	293390	526190	350130	0.21386	-2.29357	-2.50743	191
Q8CG27	Actin-like protein 9	Actl9	sp|Q8CG27|ACTL9_MOUSE Actin-like protein 9 OS=Mus musculus GN=Actl9 PE=1 SV=1	1	3	10.8	45.771	415	0.00026867	5.3751	6677400	816670	1438500	1069800	941120	1640500	0.213728	-0.649098	-0.862826	3069
Q80XQ2	TBC1 domain family member 5	Tbc1d5	sp|Q80XQ2|TBCD5_MOUSE TBC1 domain family member 5 OS=Mus musculus GN=Tbc1d5 PE=1 SV=2	1	11	19.3	91.836	815	0	29.438	14855000	2523300	2448900	2216100	4085000	2198300	0.213139	0.547842	0.334702	2582
P62874;Q61011	Guanine nucleotide-binding protein G(I)/G(S)/G(T) subunit beta-1	Gnb1	sp|P62874|GBB1_MOUSE Guanine nucleotide-binding protein G(I)/G(S)/G(T) subunit beta-1 OS=Mus musculus GN=Gnb1 PE=1 SV=3	2	9	27.9	37.377	340	0	51.172	71575000	15060000	8637700	14363000	9898800	13515000	0.212975	2.7456	2.53263	1329
O54863	Testis-specific serine/threonine-protein kinase 2	Tssk2	sp|O54863|TSSK2_MOUSE Testis-specific serine/threonine-protein kinase 2 OS=Mus musculus GN=Tssk2 PE=1 SV=2	1	7	20.1	41.022	358	0.00026525	5.1404	4016000	1106800	404050	533340	792320	916390	0.212886	-1.34663	-1.55952	555
Q8BX09	Retinoblastoma-binding protein 5	Rbbp5	sp|Q8BX09|RBBP5_MOUSE Retinoblastoma-binding protein 5 OS=Mus musculus GN=Rbbp5 PE=1 SV=2	1	9	20.8	59.097	538	0	11.439	5423200	1052600	793350	1162600	1245400	681480	0.21219	-0.896838	-1.10903	2875
Q61026	Nuclear receptor coactivator 2	Ncoa2	sp|Q61026|NCOA2_MOUSE Nuclear receptor coactivator 2 OS=Mus musculus GN=Ncoa2 PE=1 SV=3	1	23	19.7	158.46	1462	0	52.627	12611000	1996100	2368600	1931300	3085800	2230300	0.212155	0.353744	0.141589	1988
P59114	Phosphorylated CTD-interacting factor 1	Pcif1	sp|P59114|PCIF1_MOUSE Phosphorylated CTD-interacting factor 1 OS=Mus musculus GN=Pcif1 PE=1 SV=1	1	5	8.1	80.504	706	0.00072376	3.5888	800060	130680	121070	87351	112420	261960	0.212054	-3.75795	-3.97001	1211
O70194	Eukaryotic translation initiation factor 3 subunit D	Eif3d	sp|O70194|EIF3D_MOUSE Eukaryotic translation initiation factor 3 subunit D OS=Mus musculus GN=Eif3d PE=1 SV=2	1	14	28.5	63.988	548	0	168.29	92633000	17304000	15146000	17941000	18462000	16552000	0.211868	3.2498	3.03793	595
Q80TP3	E3 ubiquitin-protein ligase UBR5	Ubr5	sp|Q80TP3|UBR5_MOUSE E3 ubiquitin-protein ligase UBR5 OS=Mus musculus GN=Ubr5 PE=1 SV=2	1	50	22.6	308.35	2792	0	215.71	16958000	3125900	2695700	3203300	3775300	2612300	0.211638	0.770083	0.558445	2500
Q9CYK2	Glutaminyl-peptide cyclotransferase	Qpct	sp|Q9CYK2|QPCT_MOUSE Glutaminyl-peptide cyclotransferase OS=Mus musculus GN=Qpct PE=1 SV=2	1	8	30.7	41.118	362	0	64.553	180360000	30687000	24533000	24768000	34098000	31574000	0.211405	4.01049	3.79908	4057
Q8K0E8;CON__P02676	Fibrinogen beta chain;Fibrinopeptide B;Fibrinogen beta chain	Fgb	sp|Q8K0E8|FIBB_MOUSE Fibrinogen beta chain OS=Mus musculus GN=Fgb PE=1 SV=1	2	12	25.6	54.752	481	0	52.92	23225000	2053900	4909900	3216600	4723300	2718800	0.211017	0.899027	0.688009	3163
Q8BVN9	Protein maelstrom homolog	Mael	sp|Q8BVN9|MAEL_MOUSE Protein maelstrom homolog OS=Mus musculus GN=Mael PE=1 SV=1	1	12	35.5	49.371	434	0	182.39	110000000	15122000	21376000	18700000	24795000	16164000	0.210916	3.40014	3.18923	2850
Q9QZQ1	Afadin	Mllt4	sp|Q9QZQ1|AFAD_MOUSE Afadin OS=Mus musculus GN=Mllt4 PE=1 SV=3	1	9	6	206.5	1820	0	13.626	1321100	222460	222650	217470	341380	191370	0.210639	-2.93615	-3.14679	4744
Q99JI4	26S proteasome non-ATPase regulatory subunit 6	Psmd6	sp|Q99JI4|PSMD6_MOUSE 26S proteasome non-ATPase regulatory subunit 6 OS=Mus musculus GN=Psmd6 PE=1 SV=1	1	21	44.7	45.536	389	0	175.88	87946000	15539000	14006000	15999000	16667000	15504000	0.210182	3.11406	2.90388	3710
Q924T3	DNA repair protein XRCC4	Xrcc4	sp|Q924T3|XRCC4_MOUSE DNA repair protein XRCC4 OS=Mus musculus GN=Xrcc4 PE=1 SV=1	1	4	14.4	37.06	326	0	10.818	7318400	858180	1604900	1731000	920840	1305100	0.209959	-0.538144	-0.748103	3684
Q8C6G1	Protein C21orf2 homolog		sp|Q8C6G1|CU002_MOUSE Protein C21orf2 homolog OS=Mus musculus PE=1 SV=1	1	7	37.8	28.239	249	0	39.148	23219000	4139500	3452000	3457600	7317900	2747200	0.209889	1.14931	0.939425	2991
Q9D515;A6X8J1		Slxl1;Gm16405	tr|Q9D515|Q9D515_MOUSE Protein Slxl1 OS=Mus musculus GN=Slxl1 PE=2 SV=1;tr|A6X8J1|A6X8J1_MOUSE Protein Gm16405 OS=Mus musculus GN=Gm16405 PE=4 SV=1	2	4	43.2	18.02	155	0	96.199	118710000	12420000	25608000	15129000	27172000	17732000	0.209247	3.38678	3.17754	134
Q8CEC0	Nuclear pore complex protein Nup88	Nup88	sp|Q8CEC0|NUP88_MOUSE Nuclear pore complex protein Nup88 OS=Mus musculus GN=Nup88 PE=1 SV=1	1	8	15	84.937	753	0	25.036	6696900	1501600	773230	818010	1550600	1267000	0.209024	-0.662262	-0.871286	3054
Q9DBZ5	Eukaryotic translation initiation factor 3 subunit K	Eif3k	sp|Q9DBZ5|EIF3K_MOUSE Eukaryotic translation initiation factor 3 subunit K OS=Mus musculus GN=Eif3k PE=1 SV=1	1	8	42.2	25.086	218	0	79.595	91520000	14464000	16688000	18163000	23026000	11507000	0.208568	3.18711	2.97855	4449
Q810N5	Uncharacterized protein C12orf60 homolog		sp|Q810N5|CL060_MOUSE Uncharacterized protein C12orf60 homolog OS=Mus musculus PE=2 SV=1	1	10	45.3	28.062	247	0	27.645	26920000	8946900	2359200	4549700	6543400	4180200	0.208565	1.42939	1.22082	2625
Q91YR1	Twinfilin-1	Twf1	sp|Q91YR1|TWF1_MOUSE Twinfilin-1 OS=Mus musculus GN=Twf1 PE=1 SV=2	1	12	37.4	40.079	350	0	156.35	40087000	11306000	3739000	6915800	6124200	8326500	0.208487	1.9303	1.72181	3590
Q8R5L3	Vam6/Vps39-like protein	Vps39	sp|Q8R5L3|VPS39_MOUSE Vam6/Vps39-like protein OS=Mus musculus GN=Vps39 PE=1 SV=1	1	3	4	101.69	886	0.00049603	4.0399	665150	138690	60965	54161	224120	82116	0.208099	-4.21389	-4.42199	3366
Q08857	Platelet glycoprotein 4	Cd36	sp|Q08857|CD36_MOUSE Platelet glycoprotein 4 OS=Mus musculus GN=Cd36 PE=1 SV=2	1	2	4.2	52.697	472	0	24.338	8293900	2337100	881670	1469600	1138300	2266100	0.207937	-0.249569	-0.457505	1569
Q922P9	Putative oxidoreductase GLYR1	Glyr1	sp|Q922P9|GLYR1_MOUSE Putative oxidoreductase GLYR1 OS=Mus musculus GN=Glyr1 PE=1 SV=1	1	3	6.6	59.715	546	0.00049988	4.1451	793600	176240	98594	162630	232040	77774	0.207832	-3.69456	-3.90239	3658
Q8C6G8	WD repeat-containing protein 26	Wdr26	sp|Q8C6G8|WDR26_MOUSE WD repeat-containing protein 26 OS=Mus musculus GN=Wdr26 PE=1 SV=3	1	10	19	70.543	641	0	35.115	13444000	2107700	2179300	2157000	2823900	2070500	0.207744	0.328491	0.120747	2992
Q3TTY0	Phospholipase B1, membrane-associated;Phospholipase A2;Lysophospholipase	Plb1	sp|Q3TTY0|PLB1_MOUSE Phospholipase B1, membrane-associated OS=Mus musculus GN=Plb1 PE=1 SV=2	1	5	4.3	164.54	1478	0.00050403	4.3112	430060	100220	50099	106720	70747	60310	0.207282	-4.59066	-4.79794	1659
P21279	Guanine nucleotide-binding protein G(q) subunit alpha	Gnaq	sp|P21279|GNAQ_MOUSE Guanine nucleotide-binding protein G(q) subunit alpha OS=Mus musculus GN=Gnaq PE=1 SV=4	1	2	7.8	42.158	359	0.0063654	2.0931	359720	149690	18460	0	84920	106650	0.206125	-5.0226	-5.22872	881
Q8R368;E9PYU5	Dyslexia susceptibility 1 candidate gene 1 protein homolog	Dyx1c1;Dyx1c1Ccpg1	sp|Q8R368|DYXC1_MOUSE Dyslexia susceptibility 1 candidate gene 1 protein homolog OS=Mus musculus GN=Dyx1c1 PE=1 SV=2;tr|E9PYU5|E9PYU5_MOUSE Protein Gm44503 OS=Mus musculus GN=Gm44503 PE=4 SV=1	2	7	17.9	48.125	420	0	22.042	16023000	2570300	3153400	3216100	3856600	2373300	0.205703	0.736105	0.530401	3330
B1AWG4		Lrrc37a	tr|B1AWG4|B1AWG4_MOUSE Protein Lrrc37a (Fragment) OS=Mus musculus GN=Lrrc37a PE=1 SV=1	1	8	3.4	356.68	3215	0	10.249	782480	73745	214990	98723	164490	156630	0.20511	-3.7634	-3.96851	148
Q9JJL0		Tsga8	tr|Q9JJL0|Q9JJL0_MOUSE Haploid specific alanine-rich acidic protein OS=Mus musculus GN=Tsga8 PE=1 SV=1	1	4	17.6	22.769	238	0	44.4	352880000	20086000	131250000	53266000	63864000	50663000	0.204778	4.9079	4.70313	4608
Q9DC23	DnaJ homolog subfamily C member 10	Dnajc10	sp|Q9DC23|DJC10_MOUSE DnaJ homolog subfamily C member 10 OS=Mus musculus GN=Dnajc10 PE=1 SV=2	1	28	37.3	90.582	793	0	323.31	190700000	34855000	20229000	21544000	30574000	36182000	0.204672	3.95648	3.7518	4452
Q9DAJ2	Tektin-1	Tekt1	sp|Q9DAJ2|TEKT1_MOUSE Tektin-1 OS=Mus musculus GN=Tekt1 PE=1 SV=1	1	10	26.8	48.64	418	0	42.939	33599000	6497400	4991300	5866400	6413800	6229000	0.203192	1.73381	1.53062	4374
Q9D513	Meiosis-specific with OB domain-containing protein	Meiob	sp|Q9D513|MEIOB_MOUSE Meiosis-specific with OB domain-containing protein OS=Mus musculus GN=Meiob PE=1 SV=3	1	3	6.2	52.975	470	0.0027379	2.807	1533700	180370	335060	229330	454050	180760	0.202375	-2.80088	-3.00326	4218
P97496	SWI/SNF complex subunit SMARCC1	Smarcc1	sp|P97496|SMRC1_MOUSE SWI/SNF complex subunit SMARCC1 OS=Mus musculus GN=Smarcc1 PE=1 SV=2	1	19	18.5	122.89	1104	0	11.591	4025800	550030	787530	629200	585040	980520	0.202057	-1.38047	-1.58253	1482
Q9D968	Host cell factor 2	Hcfc2	sp|Q9D968|HCFC2_MOUSE Host cell factor 2 OS=Mus musculus GN=Hcfc2 PE=1 SV=1	1	4	19.5	26.178	241	0	7.0552	5971600	1214800	819900	877120	1849100	775700	0.201907	-0.779994	-0.981901	4319
Q6IRU7	Centrosomal protein of 78 kDa	Cep78	sp|Q6IRU7|CEP78_MOUSE Centrosomal protein of 78 kDa OS=Mus musculus GN=Cep78 PE=2 SV=1	1	4	5.3	86.889	790	0.00026589	5.2099	871440	191760	117810	248440	90019	192120	0.201801	-3.51127	-3.71307	2222
Q9D061	Acyl-CoA-binding domain-containing protein 6	Acbd6	sp|Q9D061|ACBD6_MOUSE Acyl-CoA-binding domain-containing protein 6 OS=Mus musculus GN=Acbd6 PE=1 SV=2	1	4	14.9	30.887	282	0.00027701	5.9153	2948500	495930	446550	462720	576710	494130	0.20176	-1.86471	-2.06647	4093
P23578	Acrosin;Acrosin light chain;Acrosin heavy chain	Acr	sp|P23578|ACRO_MOUSE Acrosin OS=Mus musculus GN=Acr PE=1 SV=1	1	8	25.2	48.929	436	0	114.44	24500000	4122200	4082100	4057600	5493000	3913200	0.201107	1.25845	1.05734	899
Q61699	Heat shock protein 105 kDa	Hsph1	sp|Q61699|HS105_MOUSE Heat shock protein 105 kDa OS=Mus musculus GN=Hsph1 PE=1 SV=2	1	5	6.5	96.406	858	0.00072993	3.708	976070	109760	225480	165290	183980	161520	0.200357	-3.44691	-3.64727	2048
Q91W86	Vacuolar protein sorting-associated protein 11 homolog	Vps11	sp|Q91W86|VPS11_MOUSE Vacuolar protein sorting-associated protein 11 homolog OS=Mus musculus GN=Vps11 PE=1 SV=3	1	10	13.3	107.72	941	0	15.836	4568800	888380	711310	744890	1090000	779670	0.199835	-1.11029	-1.31012	3526
Q9CXY9	GPI-anchor transamidase	Pigk	sp|Q9CXY9|GPI8_MOUSE GPI-anchor transamidase OS=Mus musculus GN=Pigk PE=1 SV=2	1	4	12.4	44.895	395	0	6.7179	5298700	1159900	752230	1074500	931260	1025700	0.1995	-0.877897	-1.0774	4038
Q3UVL4	Vacuolar protein sorting-associated protein 51 homolog	Vps51	sp|Q3UVL4|VPS51_MOUSE Vacuolar protein sorting-associated protein 51 homolog OS=Mus musculus GN=Vps51 PE=1 SV=2	1	17	25.3	86.186	782	0	57.287	17904000	3537100	2416900	3109800	4042000	2502800	0.199229	0.768071	0.568842	1785
O35343	Importin subunit alpha-3	Kpna4	sp|O35343|IMA3_MOUSE Importin subunit alpha-3 OS=Mus musculus GN=Kpna4 PE=1 SV=1	1	8	15.2	57.922	521	0	61.672	45283000	5387100	9506200	7344900	9175200	6836400	0.198664	2.05883	1.86017	504
Q9DCJ9	N-acetylneuraminate lyase	Npl	sp|Q9DCJ9|NPL_MOUSE N-acetylneuraminate lyase OS=Mus musculus GN=Npl PE=1 SV=1	1	17	51.2	35.13	320	0	291.3	178880000	25804000	34955000	35243000	28382000	34042000	0.198609	4.12806	3.92945	4465
Q8VDG7	Platelet-activating factor acetylhydrolase 2, cytoplasmic	Pafah2	sp|Q8VDG7|PAFA2_MOUSE Platelet-activating factor acetylhydrolase 2, cytoplasmic OS=Mus musculus GN=Pafah2 PE=1 SV=2	1	10	29.2	43.561	390	0	15.429	9211700	1688000	1566500	1525200	1785500	1981900	0.19792	-0.0796703	-0.277591	3417
Q8VDP6	CDP-diacylglycerol--inositol 3-phosphatidyltransferase	Cdipt	sp|Q8VDP6|CDIPT_MOUSE CDP-diacylglycerol--inositol 3-phosphatidyltransferase OS=Mus musculus GN=Cdipt PE=1 SV=1	1	4	22.1	23.599	213	0	36.65	14498000	3381200	1833900	2664700	3099700	2346300	0.197884	0.535089	0.337205	3428
Q9ERK4	Exportin-2	Cse1l	sp|Q9ERK4|XPO2_MOUSE Exportin-2 OS=Mus musculus GN=Cse1l PE=1 SV=1	1	48	45.3	110.45	971	0	323.31	431740000	74548000	71805000	63632000	77278000	99785000	0.19703	5.41106	5.21404	4528
Q8BVA5	UPF0554 protein C2orf43 homolog		sp|Q8BVA5|LDAH_MOUSE Lipid droplet-associated hydrolase OS=Mus musculus GN=Ldah PE=1 SV=1	1	1	4	37.374	326	0.0027416	2.8176	805510	277080	58557	98007	0	267810	0.196747	-3.75509	-3.95184	2844
Q91WQ3	Tyrosine--tRNA ligase, cytoplasmic;Tyrosine--tRNA ligase, cytoplasmic, N-terminally processed	Yars	sp|Q91WQ3|SYYC_MOUSE Tyrosine--tRNA ligase, cytoplasmic OS=Mus musculus GN=Yars PE=1 SV=3	1	18	36.2	59.105	528	0	31.288	11494000	483500	4058200	1682500	2387500	853370	0.19485	-0.297957	-0.492807	3549
Q9CQI3	Glia maturation factor beta	Gmfb	sp|Q9CQI3|GMFB_MOUSE Glia maturation factor beta OS=Mus musculus GN=Gmfb PE=1 SV=3	1	7	54.2	16.723	142	0	221	222940000	27827000	44598000	30232000	50483000	35708000	0.194589	4.35423	4.15964	3906
Q91XU0	ATPase WRNIP1	Wrnip1	sp|Q91XU0|WRIP1_MOUSE ATPase WRNIP1 OS=Mus musculus GN=Wrnip1 PE=1 SV=2	1	4	7	71.793	660	0.00094007	3.1903	651710	272460	27764	74598	107440	102260	0.194274	-4.30801	-4.50228	3570
D3YZZ5		Tmed7	tr|D3YZZ5|D3YZZ5_MOUSE Protein Tmed7 OS=Mus musculus GN=Tmed7 PE=1 SV=1	1	4	20.5	25.2	224	0	23.283	28343000	3885000	6003800	5363300	5021300	5209900	0.194197	1.48707	1.29287	251
P70444	BH3-interacting domain death agonist;BH3-interacting domain death agonist p15;BH3-interacting domain death agonist p13;BH3-interacting domain death agonist p11	Bid	sp|P70444|BID_MOUSE BH3-interacting domain death agonist OS=Mus musculus GN=Bid PE=1 SV=2	1	2	14.4	21.951	195	0.0025264	2.8804	3984200	293290	1150400	906870	1008000	266670	0.193543	-1.56921	-1.76275	1412
Q61285	ATP-binding cassette sub-family D member 2	Abcd2	sp|Q61285|ABCD2_MOUSE ATP-binding cassette sub-family D member 2 OS=Mus musculus GN=Abcd2 PE=1 SV=1	1	1	1.6	83.482	741	0.0043299	2.2809	209070	41306	35519	48469	35711	40369	0.193368	-5.49204	-5.68541	2020
Q9R1C0	Transcription initiation factor TFIID subunit 7	Taf7	sp|Q9R1C0|TAF7_MOUSE Transcription initiation factor TFIID subunit 7 OS=Mus musculus GN=Taf7 PE=1 SV=1	1	3	10.9	39.125	341	0.00051046	4.4848	3159500	276590	1012000	582050	808820	390370	0.192438	-1.70507	-1.89751	4779
Q3UV17	Keratin, type II cytoskeletal 2 oral	Krt76	sp|Q3UV17|K22O_MOUSE Keratin, type II cytoskeletal 2 oral OS=Mus musculus GN=Krt76 PE=1 SV=1	1	10	11.3	62.844	594	0.00051746	4.6928	98826000	12246000	19044000	16289000	27710000	9755300	0.190645	3.14438	2.95373	1782
Q8CCN5	Breast carcinoma-amplified sequence 3 homolog	Bcas3	sp|Q8CCN5|BCAS3_MOUSE Breast carcinoma-amplified sequence 3 homolog OS=Mus musculus GN=Bcas3 PE=1 SV=2	1	14	17	101.02	928	0	41.476	5652700	1174300	847840	933640	1347400	976150	0.190544	-0.791644	-0.982188	3030
A2AC93	Dynein intermediate chain 2, axonemal	Dnai2	sp|A2AC93|DNAI2_MOUSE Dynein intermediate chain 2, axonemal OS=Mus musculus GN=Dnai2 PE=1 SV=2	1	8	18.1	70.967	623	0	35.599	10694000	2282800	1320600	2203000	1639700	1790600	0.190395	0.00737349	-0.183022	61
Q8VEJ9	Vacuolar protein sorting-associated protein 4A	Vps4a	sp|Q8VEJ9|VPS4A_MOUSE Vacuolar protein sorting-associated protein 4A OS=Mus musculus GN=Vps4a PE=1 SV=1	1	18	41.2	48.906	437	0	95.099	130420000	23242000	19765000	23426000	26326000	19724000	0.190289	3.63304	3.44275	3460
P20029	78 kDa glucose-regulated protein	Hspa5	sp|P20029|GRP78_MOUSE 78 kDa glucose-regulated protein OS=Mus musculus GN=Hspa5 PE=1 SV=3	1	43	54	72.421	655	0	323.31	1532400000	275950000	220140000	246390000	287260000	261190000	0.189999	7.15625	6.96625	873
Q99PW8	Kinesin-like protein KIF17	Kif17	sp|Q99PW8|KIF17_MOUSE Kinesin-like protein KIF17 OS=Mus musculus GN=Kif17 PE=1 SV=1	1	23	25	116.37	1038	0	80.237	27106000	4584500	5437300	5214100	4706900	6246100	0.188837	1.52964	1.34081	3833
Q62426	Cystatin-B	Cstb	sp|Q62426|CYTB_MOUSE Cystatin-B OS=Mus musculus GN=Cstb PE=1 SV=1	1	4	41.8	11.045	98	0	50.682	100380000	7191300	28158000	10652000	23391000	14231000	0.188384	3.04023	2.85184	2112
Q9CPS8	Small membrane A-kinase anchor protein		sp|Q9CPS8|SMAKA_MOUSE Small membrane A-kinase anchor protein OS=Mus musculus PE=1 SV=1	1	1	13.2	11.926	106	0	25.863	6207500	1686900	385000	593080	1599500	678930	0.188379	-1.10199	-1.29037	3846
Q8BUV3	Gephyrin;Molybdopterin adenylyltransferase;Molybdopterin molybdenumtransferase	Gphn	sp|Q8BUV3|GEPH_MOUSE Gephyrin OS=Mus musculus GN=Gphn PE=1 SV=2	1	3	4.7	83.281	769	0.0016298	3.0697	492000	135320	28128	102530	76326	36907	0.18814	-4.80958	-4.99772	2840
P62743	AP-2 complex subunit sigma	Ap2s1	sp|P62743|AP2S1_MOUSE AP-2 complex subunit sigma OS=Mus musculus GN=Ap2s1 PE=1 SV=1	1	2	10.6	17.018	142	0.006572	2.0835	25719000	5548800	3300400	3710400	5601800	4635900	0.187977	1.30636	1.11839	1313
F8VQG7		N4bp2	tr|F8VQG7|F8VQG7_MOUSE Protein N4bp2 OS=Mus musculus GN=N4bp2 PE=1 SV=1	1	8	6.9	184.7	1678	0	11.99	1211200	116430	314420	293860	170080	172230	0.187762	-3.17711	-3.36487	394
Q9WU28	Prefoldin subunit 5	Pfdn5	sp|Q9WU28|PFD5_MOUSE Prefoldin subunit 5 OS=Mus musculus GN=Pfdn5 PE=1 SV=1	1	2	16.2	17.356	154	0.00071616	3.4106	4883400	411740	1150700	479880	1235100	674580	0.186599	-1.33126	-1.51786	4813
Q9Z1B5	Mitotic spindle assembly checkpoint protein MAD2A	Mad2l1	sp|Q9Z1B5|MD2L1_MOUSE Mitotic spindle assembly checkpoint protein MAD2A OS=Mus musculus GN=Mad2l1 PE=1 SV=2	1	3	13.2	23.598	205	0.00072674	3.655	11118000	1712300	1894400	1543700	2862300	1619200	0.186058	0.0558755	-0.130182	4893
Q3TZ89	Protein transport protein Sec31B	Sec31b	sp|Q3TZ89|SC31B_MOUSE Protein transport protein Sec31B OS=Mus musculus GN=Sec31b PE=1 SV=2	1	2	2.3	125.63	1158	0.0031153	2.5712	6611000	1006600	974050	899430	1450400	909980	0.185314	-0.807927	-0.993241	1672
P97384	Annexin A11	Anxa11	sp|P97384|ANX11_MOUSE Annexin A11 OS=Mus musculus GN=Anxa11 PE=1 SV=2	1	13	30.2	54.079	503	0	29.029	26665000	5474900	2823000	3498400	5236100	4052100	0.184869	1.18088	0.99601	1461
Q6TXD4	Dynamin-binding protein	Dnmbp	sp|Q6TXD4|DNMBP_MOUSE Dynamin-binding protein OS=Mus musculus GN=Dnmbp PE=1 SV=2	1	9	7.6	177.27	1580	0	14.029	1566400	284030	265770	313520	310950	259590	0.184327	-2.65851	-2.84284	2363
A2A6A1	G patch domain-containing protein 8	Gpatch8	sp|A2A6A1|GPTC8_MOUSE G patch domain-containing protein 8 OS=Mus musculus GN=Gpatch8 PE=1 SV=1	1	12	9.9	164.99	1505	0	15.003	1545200	121900	529770	249320	370790	216440	0.183937	-2.77148	-2.95542	54
Q922R1	UPF0183 protein C16orf70 homolog		sp|Q922R1|CP070_MOUSE UPF0183 protein C16orf70 homolog OS=Mus musculus PE=1 SV=2	1	1	2.4	47.416	422	0.0039105	2.3184	539120	144720	0	92951	136210	165240	0.183802	-3.85736	-4.04116	3663
E9Q616		Ahnak	tr|E9Q616|E9Q616_MOUSE Protein Ahnak OS=Mus musculus GN=Ahnak PE=1 SV=1	1	85	42.2	604.25	5656	0	312.4	11941000	2112400	2047600	2237400	2250300	2177400	0.18372	0.261108	0.0773878	335
P24668	Cation-dependent mannose-6-phosphate receptor	M6pr	sp|P24668|MPRD_MOUSE Cation-dependent mannose-6-phosphate receptor OS=Mus musculus GN=M6pr PE=1 SV=1	1	3	15.5	31.172	278	0.00027248	5.6113	8396400	973780	2011100	1788600	2293000	811200	0.181852	-0.312342	-0.494194	911
Q60870	Receptor expression-enhancing protein 5	Reep5	sp|Q60870|REEP5_MOUSE Receptor expression-enhancing protein 5 OS=Mus musculus GN=Reep5 PE=1 SV=1	1	1	5.4	21.05	185	0	9.8779	16153000	4383000	1154400	1429200	3986800	2420900	0.181075	0.371586	0.190511	1971
Q6TEK5	Vitamin K epoxide reductase complex subunit 1-like protein 1	Vkorc1l1	sp|Q6TEK5|VKORL_MOUSE Vitamin K epoxide reductase complex subunit 1-like protein 1 OS=Mus musculus GN=Vkorc1l1 PE=1 SV=1	1	3	15.9	19.778	176	0.0018476	2.9447	19586000	3916200	2897900	2476100	3591800	5208000	0.180884	0.954094	0.773211	2362
Q923B1	Lariat debranching enzyme	Dbr1	sp|Q923B1|DBR1_MOUSE Lariat debranching enzyme OS=Mus musculus GN=Dbr1 PE=1 SV=2	1	5	10.9	62.289	550	0	9.2849	3577800	246860	1297000	539460	694100	585830	0.180593	-1.61996	-1.80055	3672
P51125	Calpastatin	Cast	sp|P51125|ICAL_MOUSE Calpastatin OS=Mus musculus GN=Cast PE=1 SV=2	1	3	5.8	84.921	788	0.0045298	2.2543	1353300	206470	252680	209440	448120	153450	0.179721	-2.92961	-3.10933	1117
P62313	U6 snRNA-associated Sm-like protein LSm6	Lsm6	sp|P62313|LSM6_MOUSE U6 snRNA-associated Sm-like protein LSm6 OS=Mus musculus GN=Lsm6 PE=1 SV=1	1	4	35	9.1275	80	0	15.919	45523000	3003100	13959000	5430700	10490000	5757200	0.179642	1.89541	1.71577	1297
Q9CYT6	Adenylyl cyclase-associated protein 2	Cap2	sp|Q9CYT6|CAP2_MOUSE Adenylyl cyclase-associated protein 2 OS=Mus musculus GN=Cap2 PE=1 SV=1	1	6	15.5	52.861	476	0	12.208	1705100	266080	298900	304970	310130	286530	0.179595	-2.62559	-2.80519	4061
Q5SV85	Synergin gamma	Synrg	sp|Q5SV85|SYNRG_MOUSE Synergin gamma OS=Mus musculus GN=Synrg PE=1 SV=1	1	18	19.7	139.61	1306	0	51.607	7702100	1981600	886810	947390	1888900	1571300	0.17911	-0.393229	-0.572339	1918
P56480	ATP synthase subunit beta, mitochondrial	Atp5b	sp|P56480|ATPB_MOUSE ATP synthase subunit beta, mitochondrial OS=Mus musculus GN=Atp5b PE=1 SV=2	1	10	23.3	56.3	529	0	33.087	10699000	2217900	1768700	2147900	1861600	2344700	0.178963	0.185884	0.00692081	1185
E9Q963		Gm1661	tr|E9Q963|E9Q963_MOUSE Protein Gm1661 OS=Mus musculus GN=Gm1661 PE=1 SV=1	1	5	12.7	49.24	441	0	15.796	3128600	757890	362610	673440	379560	679620	0.178611	-1.73213	-1.91074	356
[truncated: 3,199 more rows]
