# Supplementary material for: Androglobin, a chimeric mammalian globin, is required for male fertility
Source: eLife. 2022 Jun 14;11:e72374. doi: 10.7554/eLife.72374 (PMC9249397; doi:10.7554/eLife.72374)
Supplement: Figure 6—source data 5. [file elife-72374-fig6-data5.xlsx]

## Sheet: proteinGroups
Protein IDs	Protein names	Gene names	Fasta headers	Number of proteins	Peptides	Sequence coverage [%]	Mol. weight [kDa]	Sequence length	Q-value	Score	iBAQ	iBAQ ADGB	iBAQ ctrl	log2 (ADGB/GFP)	log2 (ADGB)	log2 (GFP)	id
Q8N7X0	Androglobin	ADGB	sp|Q8N7X0|ADGB_HUMAN Androglobin OS=Homo sapiens GN=ADGB PE=2 SV=3	1	17	7.3	189.71	1667	0	323.31	454050000	454030000	19548	11.9504	10.3515	-1.59889	1062
P46379	Large proline-rich protein BAG6	BAG6	sp|P46379|BAG6_HUMAN Large proline-rich protein BAG6 OS=Homo sapiens GN=BAG6 PE=1 SV=2	1	20	25.8	119.41	1132	0	233.88	5423800	5419600	4148.4	7.79835	3.96306	-3.83529	530
Q16891	MICOS complex subunit MIC60	IMMT	sp|Q16891|MIC60_HUMAN MICOS complex subunit MIC60 OS=Homo sapiens GN=IMMT PE=1 SV=1	1	11	19.3	83.677	758	0	81.715	1118900	1117300	1595.5	6.89872	1.68489	-5.21383	907
O75694	Nuclear pore complex protein Nup155	NUP155	sp|O75694|NU155_HUMAN Nuclear pore complex protein Nup155 OS=Homo sapiens GN=NUP155 PE=1 SV=1	1	24	21.6	155.2	1391	0	323.31	2376100	2371700	4492.5	6.49112	2.7708	-3.72032	190
Q07864	DNA polymerase epsilon catalytic subunit A	POLE	sp|Q07864|DPOE1_HUMAN DNA polymerase epsilon catalytic subunit A OS=Homo sapiens GN=POLE PE=1 SV=5	1	17	9.6	261.51	2286	0	129.46	471280	470350	934.02	6.423	0.43668	-5.98632	761
Q99707	Methionine synthase	MTR	sp|Q99707|METH_HUMAN Methionine synthase OS=Homo sapiens GN=MTR PE=1 SV=2	1	24	24.7	140.53	1265	0	185.29	1630100	1626800	3237.9	6.41969	2.22691	-4.19278	1199
Q9NU22	Midasin	MDN1	sp|Q9NU22|MDN1_HUMAN Midasin OS=Homo sapiens GN=MDN1 PE=1 SV=2	1	23	5.2	632.81	5596	0	147.26	146210	145900	313.39	6.30974	-1.25207	-7.56181	1327
P50990	T-complex protein 1 subunit theta	CCT8	sp|P50990|TCPQ_HUMAN T-complex protein 1 subunit theta OS=Homo sapiens GN=CCT8 PE=1 SV=4	1	24	47.4	59.62	548	0	246.57	3016400	3008800	7581.8	6.07936	3.11406	-2.9653	575
P54707;REV__Q15772	Potassium-transporting ATPase alpha chain 2	ATP12A	sp|P54707|AT12A_HUMAN Potassium-transporting ATPase alpha chain 2 OS=Homo sapiens GN=ATP12A PE=1 SV=3	2	3	2.7	115.51	1039	0.0016142	7.9518	305950	305160	789.95	6.04052	-0.187489	-6.22801	612
Q8WUM0	Nuclear pore complex protein Nup133	NUP133	sp|Q8WUM0|NU133_HUMAN Nuclear pore complex protein Nup133 OS=Homo sapiens GN=NUP133 PE=1 SV=2	1	9	10.9	128.98	1156	0	72.512	630840	628660	2179.1	5.61934	0.855227	-4.76411	1106
Q12769	Nuclear pore complex protein Nup160	NUP160	sp|Q12769|NU160_HUMAN Nuclear pore complex protein Nup160 OS=Homo sapiens GN=NUP160 PE=1 SV=3	1	11	9.5	162.12	1436	0	75.697	498590	496660	1923	5.45969	0.515205	-4.94448	776
O00165	HCLS1-associated protein X-1	HAX1	sp|O00165|HAX1_HUMAN HCLS1-associated protein X-1 OS=Homo sapiens GN=HAX1 PE=1 SV=2	1	9	43.7	31.62	279	0	109.09	7075400	7047500	27947	5.42521	4.34199	-1.08322	69
O75533	Splicing factor 3B subunit 1	SF3B1	sp|O75533|SF3B1_HUMAN Splicing factor 3B subunit 1 OS=Homo sapiens GN=SF3B1 PE=1 SV=3	1	23	26.9	145.83	1304	0	188.52	1673800	1667000	6794.3	5.38565	2.26213	-3.12352	184
Q8TEX9	Importin-4	IPO4	sp|Q8TEX9|IPO4_HUMAN Importin-4 OS=Homo sapiens GN=IPO4 PE=1 SV=2	1	17	22.7	118.71	1081	0	153.7	1618700	1611900	6857.1	5.32388	2.21364	-3.11024	1100
Q9BXW9	Fanconi anemia group D2 protein	FANCD2	sp|Q9BXW9|FACD2_HUMAN Fanconi anemia group D2 protein OS=Homo sapiens GN=FANCD2 PE=1 SV=2	1	6	4.1	164.13	1451	0	36.68	140850	140220	622.63	5.26203	-1.30936	-6.57139	1243
O95071	E3 ubiquitin-protein ligase UBR5	UBR5	sp|O95071|UBR5_HUMAN E3 ubiquitin-protein ligase UBR5 OS=Homo sapiens GN=UBR5 PE=1 SV=2	1	31	16.1	309.35	2799	0	254.12	918880	914680	4198.3	5.21425	1.39621	-3.81804	209
Q92621	Nuclear pore complex protein Nup205	NUP205	sp|Q92621|NU205_HUMAN Nuclear pore complex protein Nup205 OS=Homo sapiens GN=NUP205 PE=1 SV=3	1	15	8.9	227.92	2012	0	100.69	555930	553380	2546.6	5.21049	0.671217	-4.53927	1127
O43847	Nardilysin	NRD1	sp|O43847|NRDC_HUMAN Nardilysin OS=Homo sapiens GN=NRDC PE=1 SV=2	1	8	7.7	131.57	1150	0	50.662	288130	286800	1326	5.20375	-0.277008	-5.48076	141
P14868	Aspartate--tRNA ligase, cytoplasmic	DARS	sp|P14868|SYDC_HUMAN Aspartate--tRNA ligase, cytoplasmic OS=Homo sapiens GN=DARS PE=1 SV=2	1	22	52.9	57.136	501	0	240.36	2958200	2944200	13945	5.16892	3.08275	-2.08617	354
P52597	Heterogeneous nuclear ribonucleoprotein F;Heterogeneous nuclear ribonucleoprotein F, N-terminally processed	HNRNPF	sp|P52597|HNRPF_HUMAN Heterogeneous nuclear ribonucleoprotein F OS=Homo sapiens GN=HNRNPF PE=1 SV=3	1	10	36.1	45.671	415	0	93.094	4112100	4090300	21859	4.99477	3.55708	-1.43769	593
O75150;Q5VTR2	E3 ubiquitin-protein ligase BRE1B	RNF40	sp|O75150|BRE1B_HUMAN E3 ubiquitin-protein ligase BRE1B OS=Homo sapiens GN=RNF40 PE=1 SV=4	2	15	19.6	113.65	1001	0	131.08	1011000	1005500	5480.5	4.96632	1.53279	-3.43353	164
Q9H3U1	Protein unc-45 homolog A	UNC45A	sp|Q9H3U1|UN45A_HUMAN Protein unc-45 homolog A OS=Homo sapiens GN=UNC45A PE=1 SV=1	1	6	7.8	103.08	944	0	37.906	188760	187650	1117.4	4.83869	-0.889009	-5.7277	1275
O94822	E3 ubiquitin-protein ligase listerin	LTN1	sp|O94822|LTN1_HUMAN E3 ubiquitin-protein ligase listerin OS=Homo sapiens GN=LTN1 PE=1 SV=6	1	14	9.6	200.55	1766	0	98.306	337010	334970	2039	4.80696	-0.0530224	-4.85998	201
Q8NI28	Putative uncharacterized protein encoded by LINC01006	LINC01006	sp|Q8NI28|CG013_HUMAN Putative uncharacterized protein encoded by LINC01006 OS=Homo sapiens GN=LINC01006 PE=5 SV=1	1	1	3.7	22.304	216	0.003663	6.3293	765780	760930	4847.2	4.7414	1.13071	-3.61069	1082
Q8N201	Integrator complex subunit 1	INTS1	sp|Q8N201|INT1_HUMAN Integrator complex subunit 1 OS=Homo sapiens GN=INTS1 PE=1 SV=2	1	5	3	244.29	2190	0	37.759	52365	52032	332.35	4.73748	-2.73958	-7.47707	1051
Q99615	DnaJ homolog subfamily C member 7	DNAJC7	sp|Q99615|DNJC7_HUMAN DnaJ homolog subfamily C member 7 OS=Homo sapiens GN=DNAJC7 PE=1 SV=2	1	16	29.4	56.44	494	0	165.23	2095400	2081900	13495	4.71626	2.58278	-2.13349	1193
P67809;Q9Y2T7	Nuclease-sensitive element-binding protein 1	YBX1	sp|P67809|YBOX1_HUMAN Nuclease-sensitive element-binding protein 1 OS=Homo sapiens GN=YBX1 PE=1 SV=3	2	4	26.9	35.924	324	0	125.16	1393100	1384100	9028.8	4.70713	1.99382	-2.71331	705
Q9Y2W1	Thyroid hormone receptor-associated protein 3	THRAP3	sp|Q9Y2W1|TR150_HUMAN Thyroid hormone receptor-associated protein 3 OS=Homo sapiens GN=THRAP3 PE=1 SV=2	1	4	4.8	108.66	955	0	25.617	160560	159510	1051.5	4.69199	-1.12341	-5.81539	1448
P17987	T-complex protein 1 subunit alpha	TCP1	sp|P17987|TCPA_HUMAN T-complex protein 1 subunit alpha OS=Homo sapiens GN=TCP1 PE=1 SV=1	1	26	54.5	60.343	556	0	323.31	15784000	15680000	104060	4.6823	5.49573	0.813431	372
P40227	T-complex protein 1 subunit zeta	CCT6A	sp|P40227|TCPZ_HUMAN T-complex protein 1 subunit zeta OS=Homo sapiens GN=CCT6A PE=1 SV=3	1	17	38.4	58.024	531	0	215.93	4431900	4402500	29418	4.67241	3.6632	-1.00921	500
P05023;P13637;P50993;Q13733;P20648	Sodium/potassium-transporting ATPase subunit alpha-1	ATP1A1	sp|P05023|AT1A1_HUMAN Sodium/potassium-transporting ATPase subunit alpha-1 OS=Homo sapiens GN=ATP1A1 PE=1 SV=1	5	30	33.4	112.89	1023	0	323.31	7123200	7074900	48315	4.64103	4.34758	-0.293443	266
P33993	DNA replication licensing factor MCM7	MCM7	sp|P33993|MCM7_HUMAN DNA replication licensing factor MCM7 OS=Homo sapiens GN=MCM7 PE=1 SV=4	1	24	39.9	81.307	719	0	323.31	4712600	4680300	32224	4.62925	3.75147	-0.877778	469
Q13501	Sequestosome-1	SQSTM1	sp|Q13501|SQSTM_HUMAN Sequestosome-1 OS=Homo sapiens GN=SQSTM1 PE=1 SV=1	1	3	10.7	47.687	440	0	110.88	405050	402260	2786.7	4.62036	0.211075	-4.40928	806
P49815	Tuberin	TSC2	sp|P49815|TSC2_HUMAN Tuberin OS=Homo sapiens GN=TSC2 PE=1 SV=2	1	7	6.5	200.61	1807	0	42.148	135400	134460	934.4	4.61585	-1.36988	-5.98573	566
Q9BV68	E3 ubiquitin-protein ligase RNF126	RNF126	sp|Q9BV68|RN126_HUMAN E3 ubiquitin-protein ligase RNF126 OS=Homo sapiens GN=RNF126 PE=1 SV=1	1	3	16.9	35.584	326	0	21.55	1064700	1057300	7411.4	4.60335	1.60526	-2.9981	1235
P11441	Ubiquitin-like protein 4A	UBL4A	sp|P11441|UBL4A_HUMAN Ubiquitin-like protein 4A OS=Homo sapiens GN=UBL4A PE=1 SV=1	1	6	36.9	17.776	157	0	34.024	1642000	1630400	11652	4.57544	2.2301	-2.34534	326
P50402	Emerin	EMD	sp|P50402|EMD_HUMAN Emerin OS=Homo sapiens GN=EMD PE=1 SV=1	1	10	44.9	28.994	254	0	224.39	5685800	5642500	43225	4.47526	4.02121	-0.454048	568
Q9NVI1	Fanconi anemia group I protein	FANCI	sp|Q9NVI1|FANCI_HUMAN Fanconi anemia group I protein OS=Homo sapiens GN=FANCI PE=1 SV=4	1	18	17.6	149.32	1328	0	156.59	1035900	1027800	8101.4	4.4341	1.56443	-2.86967	1334
P35613	Basigin	BSG	sp|P35613|BASI_HUMAN Basigin OS=Homo sapiens GN=BSG PE=1 SV=2	1	4	15.3	42.2	385	0	23.874	2885400	2862700	22623	4.43038	3.04225	-1.38812	483
O14980	Exportin-1	XPO1	sp|O14980|XPO1_HUMAN Exportin-1 OS=Homo sapiens GN=XPO1 PE=1 SV=1	1	22	24.6	123.38	1071	0	323.31	2933100	2909700	23356	4.40787	3.06574	-1.34212	101
P78371	T-complex protein 1 subunit beta	CCT2	sp|P78371|TCPB_HUMAN T-complex protein 1 subunit beta OS=Homo sapiens GN=CCT2 PE=1 SV=4	1	16	35.9	57.488	535	0	188.34	2400600	2381100	19488	4.37983	2.7765	-1.60333	717
P55786;A6NEC2	Puromycin-sensitive aminopeptidase;Puromycin-sensitive aminopeptidase-like protein	NPEPPS;NPEPPSL1	sp|P55786|PSA_HUMAN Puromycin-sensitive aminopeptidase OS=Homo sapiens GN=NPEPPS PE=1 SV=2;sp|A6NEC2|PSAL_HUMAN Puromycin-sensitive aminopeptidase-like protein OS=Homo sapiens GN=NPEPPSL1 PE=2 SV=3	2	9	11.2	103.28	919	0	65.813	388890	385720	3173.4	4.37231	0.150499	-4.22181	622
O43592	Exportin-T	XPOT	sp|O43592|XPOT_HUMAN Exportin-T OS=Homo sapiens GN=XPOT PE=1 SV=2	1	16	19.6	109.96	962	0	155.98	1434500	1422700	11847	4.3549	2.03351	-2.32139	129
Q08945	FACT complex subunit SSRP1	SSRP1	sp|Q08945|SSRP1_HUMAN FACT complex subunit SSRP1 OS=Homo sapiens GN=SSRP1 PE=1 SV=1	1	11	17.6	81.074	709	0	117.47	3099700	3073500	26173	4.32259	3.14476	-1.17783	767
P49411	Elongation factor Tu, mitochondrial	TUFM	sp|P49411|EFTU_HUMAN Elongation factor Tu, mitochondrial OS=Homo sapiens GN=TUFM PE=1 SV=2	1	19	49.1	49.541	452	0	259.64	5714400	5665900	48490	4.31541	4.02718	-0.288227	557
Q86XI2	Condensin-2 complex subunit G2	NCAPG2	sp|Q86XI2|CNDG2_HUMAN Condensin-2 complex subunit G2 OS=Homo sapiens GN=NCAPG2 PE=1 SV=1	1	6	5.9	130.96	1143	0	35.148	270210	267880	2328.6	4.29291	-0.375467	-4.66838	1024
Q9Y265	RuvB-like 1	RUVBL1	sp|Q9Y265|RUVB1_HUMAN RuvB-like 1 OS=Homo sapiens GN=RUVBL1 PE=1 SV=1	1	7	19.5	50.227	456	0	99.054	1483900	1470900	12956	4.27387	2.08157	-2.19229	1437
O95347	Structural maintenance of chromosomes protein 2	SMC2	sp|O95347|SMC2_HUMAN Structural maintenance of chromosomes protein 2 OS=Homo sapiens GN=SMC2 PE=1 SV=2	1	35	32.7	135.65	1197	0	289.93	2369900	2348600	21258	4.23458	2.75668	-1.47791	215
Q8NI27	THO complex subunit 2	THOC2	sp|Q8NI27|THOC2_HUMAN THO complex subunit 2 OS=Homo sapiens GN=THOC2 PE=1 SV=2	1	3	1.7	182.77	1593	0	18.664	67516	66904	612.06	4.21921	-2.37689	-6.5961	1081
P57678	Gem-associated protein 4	GEMIN4	sp|P57678|GEMI4_HUMAN Gem-associated protein 4 OS=Homo sapiens GN=GEMIN4 PE=1 SV=2	1	16	19.2	120.04	1058	0	136.43	1584200	1569800	14422	4.2131	2.17546	-2.03764	628
Q96RG2	PAS domain-containing serine/threonine-protein kinase	PASK	sp|Q96RG2|PASK_HUMAN PAS domain-containing serine/threonine-protein kinase OS=Homo sapiens GN=PASK PE=1 SV=3	1	5	5.2	142.93	1323	0	32.199	180350	178700	1651.9	4.2042	-0.959515	-5.16372	1177
Q13043;Q13188	Serine/threonine-protein kinase 4;Serine/threonine-protein kinase 4 37kDa subunit;Serine/threonine-protein kinase 4 18kDa subunit;Serine/threonine-protein kinase 3;Serine/threonine-protein kinase 3 36kDa subunit;Serine/threonine-protein kinase 3 20kDa subunit	STK4;STK3	sp|Q13043|STK4_HUMAN Serine/threonine-protein kinase 4 OS=Homo sapiens GN=STK4 PE=1 SV=2;sp|Q13188|STK3_HUMAN Serine/threonine-protein kinase 3 OS=Homo sapiens GN=STK3 PE=1 SV=2	2	2	5.3	55.63	487	0.0010417	14.999	170680	169110	1568.4	4.19946	-1.03909	-5.23855	784
P24928	DNA-directed RNA polymerase II subunit RPB1	POLR2A	sp|P24928|RPB1_HUMAN DNA-directed RNA polymerase II subunit RPB1 OS=Homo sapiens GN=POLR2A PE=1 SV=2	1	16	9.9	217.17	1970	0	122.17	511040	506310	4726.6	4.19001	0.542967	-3.64704	414
P62158;P27482;P02585	Calmodulin	CALM1	sp|P62158|CALM_HUMAN Calmodulin OS=Homo sapiens GN=CALM1 PE=1 SV=2	3	5	44.3	16.837	149	0	323.31	11753000	11643000	109430	4.18024	5.06627	0.886023	660
Q9H1A4	Anaphase-promoting complex subunit 1	ANAPC1	sp|Q9H1A4|APC1_HUMAN Anaphase-promoting complex subunit 1 OS=Homo sapiens GN=ANAPC1 PE=1 SV=1	1	7	5.3	216.5	1944	0	40.978	127960	126770	1196	4.17478	-1.45484	-5.62962	1266
A0A0B4J2E5;Q15269;A0A096LPI6	Periodic tryptophan protein 2 homolog	PWP2	tr|A0A0B4J2E5|A0A0B4J2E5_HUMAN Protein LOC102724159 OS=Homo sapiens GN=LOC102724159 PE=1 SV=1;sp|Q15269|PWP2_HUMAN Periodic tryptophan protein 2 homolog OS=Homo sapiens GN=PWP2 PE=2 SV=2	3	7	8.8	102.45	919	0	45.918	419490	415560	3931.4	4.1708	0.258003	-3.9128	5
Q93074	Mediator of RNA polymerase II transcription subunit 12	MED12	sp|Q93074|MED12_HUMAN Mediator of RNA polymerase II transcription subunit 12 OS=Homo sapiens GN=MED12 PE=1 SV=4	1	3	1.9	243.08	2177	0	18.08	51375	50871	504.08	4.10398	-2.77214	-6.87612	1139
P52701	DNA mismatch repair protein Msh6	MSH6	sp|P52701|MSH6_HUMAN DNA mismatch repair protein Msh6 OS=Homo sapiens GN=MSH6 PE=1 SV=2	1	15	14	152.78	1360	0	103.31	563460	557810	5648.9	4.07259	0.68272	-3.38987	594
P35998	26S protease regulatory subunit 7	PSMC2	sp|P35998|PRS7_HUMAN 26S protease regulatory subunit 7 OS=Homo sapiens GN=PSMC2 PE=1 SV=3	1	14	33.7	48.633	433	0	151.82	2557800	2531700	26083	4.04778	2.86498	-1.1828	486
O43852	Calumenin	CALU	sp|O43852|CALU_HUMAN Calumenin OS=Homo sapiens GN=CALU PE=1 SV=2	1	4	15.2	37.106	315	0	29.208	307670	304490	3176.6	4.0297	-0.190659	-4.22036	142
O60502	Protein O-GlcNAcase	MGEA5	sp|O60502|OGA_HUMAN Protein O-GlcNAcase OS=Homo sapiens GN=MGEA5 PE=1 SV=2	1	7	7.9	102.91	916	0	42.177	541310	535720	5594.2	4.02834	0.624426	-3.40391	154
Q96HS1	Serine/threonine-protein phosphatase PGAM5, mitochondrial	PGAM5	sp|Q96HS1|PGAM5_HUMAN Serine/threonine-protein phosphatase PGAM5, mitochondrial OS=Homo sapiens GN=PGAM5 PE=1 SV=2	1	5	21.8	32.004	289	0	38.507	913500	903940	9564.5	4.00933	1.37917	-2.63015	1167
Q9NR09	Baculoviral IAP repeat-containing protein 6	BIRC6	sp|Q9NR09|BIRC6_HUMAN Baculoviral IAP repeat-containing protein 6 OS=Homo sapiens GN=BIRC6 PE=1 SV=2	1	11	2.8	530.25	4857	0	76.062	124300	122970	1327.4	3.98049	-1.49875	-5.47924	1315
Q3ZCQ8	Mitochondrial import inner membrane translocase subunit TIM50	TIMM50	sp|Q3ZCQ8|TIM50_HUMAN Mitochondrial import inner membrane translocase subunit TIM50 OS=Homo sapiens GN=TIMM50 PE=1 SV=2	1	6	21.8	39.646	353	0	291.18	3776800	3735800	40926	3.95919	3.42629	-0.532896	915
P78527	DNA-dependent protein kinase catalytic subunit	PRKDC	sp|P78527|PRKDC_HUMAN DNA-dependent protein kinase catalytic subunit OS=Homo sapiens GN=PRKDC PE=1 SV=3	1	135	35.6	469.08	4128	0	323.31	7676300	7592200	84098	3.94324	4.44939	0.506157	718
O75306	NADH dehydrogenase [ubiquinone] iron-sulfur protein 2, mitochondrial	NDUFS2	sp|O75306|NDUS2_HUMAN NADH dehydrogenase [ubiquinone] iron-sulfur protein 2, mitochondrial OS=Homo sapiens GN=NDUFS2 PE=1 SV=2	1	5	14.9	52.545	463	0	52.403	597330	590730	6600.4	3.93073	0.765446	-3.16529	171
P52732	Kinesin-like protein KIF11	KIF11	sp|P52732|KIF11_HUMAN Kinesin-like protein KIF11 OS=Homo sapiens GN=KIF11 PE=1 SV=2	1	24	26.7	119.16	1056	0	323.31	2012800	1990100	22688	3.9017	2.51772	-1.38398	595
Q9UQE7	Structural maintenance of chromosomes protein 3	SMC3	sp|Q9UQE7|SMC3_HUMAN Structural maintenance of chromosomes protein 3 OS=Homo sapiens GN=SMC3 PE=1 SV=2	1	46	41.2	141.54	1217	0	323.31	7229400	7147700	81764	3.8968	4.36235	0.465551	1432
O43242	26S proteasome non-ATPase regulatory subunit 3	PSMD3	sp|O43242|PSMD3_HUMAN 26S proteasome non-ATPase regulatory subunit 3 OS=Homo sapiens GN=PSMD3 PE=1 SV=2	1	18	36.9	60.977	534	0	195.77	4644100	4590800	53256	3.87659	3.72362	-0.152969	123
Q8NI36	WD repeat-containing protein 36	WDR36	sp|Q8NI36|WDR36_HUMAN WD repeat-containing protein 36 OS=Homo sapiens GN=WDR36 PE=1 SV=1	1	9	11.5	105.32	951	0	54.281	495580	489780	5801.7	3.84645	0.495079	-3.35137	1083
Q9UMS4	Pre-mRNA-processing factor 19	PRPF19	sp|Q9UMS4|PRP19_HUMAN Pre-mRNA-processing factor 19 OS=Homo sapiens GN=PRPF19 PE=1 SV=1	1	11	26.6	55.18	504	0	113.01	5656900	5590100	66768	3.83451	4.00775	0.173243	1416
Q92878	DNA repair protein RAD50	RAD50	sp|Q92878|RAD50_HUMAN DNA repair protein RAD50 OS=Homo sapiens GN=RAD50 PE=1 SV=1	1	3	2.6	153.89	1312	0	18.452	46328	45779	548.42	3.83019	-2.9243	-6.75449	1130
P09884	DNA polymerase alpha catalytic subunit	POLA1	sp|P09884|DPOLA_HUMAN DNA polymerase alpha catalytic subunit OS=Homo sapiens GN=POLA1 PE=1 SV=2	1	7	6	165.91	1462	0	42.424	236230	233380	2855.7	3.79962	-0.574373	-4.374	309
Q9BPX3	Condensin complex subunit 3	NCAPG	sp|Q9BPX3|CND3_HUMAN Condensin complex subunit 3 OS=Homo sapiens GN=NCAPG PE=1 SV=1	1	11	12.7	114.33	1015	0	89.561	877210	866450	10760	3.7783	1.31806	-2.46024	1209
Q14674	Separin	ESPL1	sp|Q14674|ESPL1_HUMAN Separin OS=Homo sapiens GN=ESPL1 PE=1 SV=3	1	5	3	233.17	2120	0	32.486	49006	48395	610.74	3.75509	-2.84412	-6.59921	846
Q99941	Cyclic AMP-dependent transcription factor ATF-6 beta;Processed cyclic AMP-dependent transcription factor ATF-6 beta	ATF6B	sp|Q99941|ATF6B_HUMAN Cyclic AMP-dependent transcription factor ATF-6 beta OS=Homo sapiens GN=ATF6B PE=1 SV=2	1	3	5.5	76.708	703	0	18.029	146780	144930	1846.5	3.74135	-1.2617	-5.00305	1206
Q68DQ2	Very large A-kinase anchor protein	CRYBG3	sp|Q68DQ2|CRBG3_HUMAN Very large A-kinase anchor protein OS=Homo sapiens GN=CRYBG3 PE=1 SV=3	1	6	3.1	330.63	2970	0	35.027	63903	63090	813.12	3.72473	-2.46157	-6.1863	953
Q7Z7L1;Q68D06;Q08AF3	Schlafen family member 11;Schlafen family member 13	SLFN11;SLFN13	sp|Q7Z7L1|SLN11_HUMAN Schlafen family member 11 OS=Homo sapiens GN=SLFN11 PE=1 SV=2;sp|Q68D06|SLN13_HUMAN Schlafen family member 13 OS=Homo sapiens GN=SLFN13 PE=2 SV=1	3	4	5.1	102.83	901	0	23.683	226660	223770	2889.1	3.72219	-0.635036	-4.35722	1012
O95831	Apoptosis-inducing factor 1, mitochondrial	AIFM1	sp|O95831|AIFM1_HUMAN Apoptosis-inducing factor 1, mitochondrial OS=Homo sapiens GN=AIFM1 PE=1 SV=1	1	14	31.2	66.9	613	0	147.85	4308300	4253200	55038	3.71891	3.61342	-0.105486	233
Q9UBM7	7-dehydrocholesterol reductase	DHCR7	sp|Q9UBM7|DHCR7_HUMAN 7-dehydrocholesterol reductase OS=Homo sapiens GN=DHCR7 PE=1 SV=1	1	5	10.5	54.489	475	0	37.566	2712200	2677500	34704	3.71657	2.94576	-0.770812	1374
Q14566	DNA replication licensing factor MCM6	MCM6	sp|Q14566|MCM6_HUMAN DNA replication licensing factor MCM6 OS=Homo sapiens GN=MCM6 PE=1 SV=1	1	7	11.4	92.888	821	0	42.12	335500	331210	4295.7	3.71564	-0.0693073	-3.78495	842
P12004	Proliferating cell nuclear antigen	PCNA	sp|P12004|PCNA_HUMAN Proliferating cell nuclear antigen OS=Homo sapiens GN=PCNA PE=1 SV=1	1	6	30.3	28.768	261	0	76.381	1865800	1841400	24342	3.68814	2.40568	-1.28247	332
Q14697	Neutral alpha-glucosidase AB	GANAB	sp|Q14697|GANAB_HUMAN Neutral alpha-glucosidase AB OS=Homo sapiens GN=GANAB PE=1 SV=3	1	14	16.5	106.87	944	0	86.512	824350	813450	10900	3.66858	1.227	-2.44159	851
O95486	Protein transport protein Sec24A	SEC24A	sp|O95486|SC24A_HUMAN Protein transport protein Sec24A OS=Homo sapiens GN=SEC24A PE=1 SV=2	1	6	6	119.75	1093	0	47.257	331650	327090	4558.1	3.61204	-0.0873661	-3.69941	223
Q9Y312	Protein AAR2 homolog	AAR2	sp|Q9Y312|AAR2_HUMAN Protein AAR2 homolog OS=Homo sapiens GN=AAR2 PE=1 SV=2	1	6	15.4	43.472	384	0	65.308	1348900	1330300	18650	3.60336	1.93663	-1.66674	1452
Q6PGP7	Tetratricopeptide repeat protein 37	TTC37	sp|Q6PGP7|TTC37_HUMAN Tetratricopeptide repeat protein 37 OS=Homo sapiens GN=TTC37 PE=1 SV=1	1	3	2.4	175.48	1564	0	16.631	33780	33302	477.72	3.57023	-3.38337	-6.9536	973
A0AVT1	Ubiquitin-like modifier-activating enzyme 6	UBA6	sp|A0AVT1|UBA6_HUMAN Ubiquitin-like modifier-activating enzyme 6 OS=Homo sapiens GN=UBA6 PE=1 SV=1	1	10	11.7	117.97	1052	0	56.964	306310	301970	4343.8	3.56624	-0.202648	-3.76888	7
Q9H583	HEAT repeat-containing protein 1;HEAT repeat-containing protein 1, N-terminally processed	HEATR1	sp|Q9H583|HEAT1_HUMAN HEAT repeat-containing protein 1 OS=Homo sapiens GN=HEATR1 PE=1 SV=3	1	11	5.8	242.37	2144	0	65.809	135050	133110	1934.8	3.55122	-1.38444	-4.93566	1280
Q92616	Translational activator GCN1	GCN1L1	sp|Q92616|GCN1_HUMAN eIF-2-alpha kinase activator GCN1 OS=Homo sapiens GN=GCN1 PE=1 SV=6	1	72	32.2	292.75	2671	0	323.31	2547000	2510400	36635	3.54548	2.85279	-0.692691	1125
Q8TCU4	Alstrom syndrome protein 1	ALMS1	sp|Q8TCU4|ALMS1_HUMAN Alstrom syndrome protein 1 OS=Homo sapiens GN=ALMS1 PE=1 SV=3	1	5	1.7	460.96	4167	0	28.105	17362	17111	251.16	3.53711	-4.34406	-7.88116	1093
Q8TCG1	Protein CIP2A	KIAA1524	sp|Q8TCG1|CIP2A_HUMAN Protein CIP2A OS=Homo sapiens GN=KIAA1524 PE=1 SV=2	1	3	3.3	102.18	905	0.0010493	16.193	126720	124870	1859.5	3.5163	-1.47663	-4.99293	1090
P31948	Stress-induced-phosphoprotein 1	STIP1	sp|P31948|STIP1_HUMAN Stress-induced-phosphoprotein 1 OS=Homo sapiens GN=STIP1 PE=1 SV=1	1	8	16.6	62.639	543	0	54.678	1318600	1298800	19809	3.48181	1.90205	-1.57976	462
Q14527	Helicase-like transcription factor	HLTF	sp|Q14527|HLTF_HUMAN Helicase-like transcription factor OS=Homo sapiens GN=HLTF PE=1 SV=2	1	8	10.2	113.93	1009	0	48.999	415500	409160	6336.4	3.45979	0.235611	-3.22418	841
P16615;O14983;Q93084	Sarcoplasmic/endoplasmic reticulum calcium ATPase 2	ATP2A2	sp|P16615|AT2A2_HUMAN Sarcoplasmic/endoplasmic reticulum calcium ATPase 2 OS=Homo sapiens GN=ATP2A2 PE=1 SV=1	3	32	33.2	114.76	1042	0	323.31	6742000	6639200	102840	3.45947	4.25588	0.796415	364
A8MPP1;Q92771;Q96FC9	Putative ATP-dependent RNA helicase DDX11-like protein 8;Putative ATP-dependent RNA helicase DDX12;Probable ATP-dependent RNA helicase DDX11	DDX11L8;DDX12P;DDX11	sp|A8MPP1|D11L8_HUMAN Putative ATP-dependent RNA helicase DDX11-like protein 8 OS=Homo sapiens GN=DDX11L8 PE=1 SV=1;sp|Q92771|DDX12_HUMAN Putative ATP-dependent RNA helicase DDX12 OS=Homo sapiens GN=DDX12P PE=5 SV=3;sp|Q96FC9|DDX11_HUMAN Probable ATP-depen	3	7	9.8	101.81	907	0	49.29	257900	253950	3948.6	3.45399	-0.452509	-3.9065	19
P49736	DNA replication licensing factor MCM2	MCM2	sp|P49736|MCM2_HUMAN DNA replication licensing factor MCM2 OS=Homo sapiens GN=MCM2 PE=1 SV=4	1	7	9.3	101.89	904	0	46.029	335820	330580	5242.6	3.42551	-0.0720539	-3.49756	564
P31689	DnaJ homolog subfamily A member 1	DNAJA1	sp|P31689|DNJA1_HUMAN DnaJ homolog subfamily A member 1 OS=Homo sapiens GN=DNAJA1 PE=1 SV=2	1	12	41.1	44.868	397	0	285.33	13355000	13145000	209960	3.41519	5.24132	1.82613	456
Q9Y4E1;Q641Q2;Q5SRD0	WASH complex subunit FAM21C;WASH complex subunit FAM21A;Putative WASH complex subunit FAM21	FAM21C;FAM21A;FAM21D	sp|Q9Y4E1|FA21C_HUMAN WASH complex subunit FAM21C OS=Homo sapiens GN=FAM21C PE=1 SV=3;sp|Q641Q2|FA21A_HUMAN WASH complex subunit FAM21A OS=Homo sapiens GN=FAM21A PE=1 SV=3;sp|Q5SRD0|FA21D_HUMAN Putative WASH complex subunit FAM21 OS=Homo sapiens GN=FAM21D	3	2	2.1	144.67	1318	0	18.67	90327	88907	1420.5	3.41476	-1.96668	-5.38144	949
O75934	Pre-mRNA-splicing factor SPF27	BCAS2	sp|O75934|SPF27_HUMAN Pre-mRNA-splicing factor SPF27 OS=Homo sapiens GN=BCAS2 PE=1 SV=1	1	5	29.3	26.131	225	0	217.86	2097400	2063800	33611	3.38716	2.57018	-0.81698	198
Q96H55	Unconventional myosin-XIX	MYO19	sp|Q96H55|MYO19_HUMAN Unconventional myosin-XIX OS=Homo sapiens GN=MYO19 PE=1 SV=2	1	6	7.2	109.13	970	0	35.815	212220	208720	3505.9	3.34257	-0.735485	-4.07806	1164
P06737;P11217;P11216	Glycogen phosphorylase, liver form	PYGL	sp|P06737|PYGL_HUMAN Glycogen phosphorylase, liver form OS=Homo sapiens GN=PYGL PE=1 SV=4	3	18	24.2	97.147	847	0	136.64	1186200	1165900	20299	3.29082	1.74632	-1.54451	283
O43681	ATPase ASNA1	ASNA1	sp|O43681|ASNA_HUMAN ATPase ASNA1 OS=Homo sapiens GN=ASNA1 PE=1 SV=2	1	5	18.4	38.792	348	0	31.503	1054000	1035900	18083	3.28704	1.57576	-1.71128	132
P84077;P61204;F5H423;H0YGG7	ADP-ribosylation factor 1;ADP-ribosylation factor 3	ARF1;ARF3	sp|P84077|ARF1_HUMAN ADP-ribosylation factor 1 OS=Homo sapiens GN=ARF1 PE=1 SV=2;sp|P61204|ARF3_HUMAN ADP-ribosylation factor 3 OS=Homo sapiens GN=ARF3 PE=1 SV=2;tr|F5H423|F5H423_HUMAN Uncharacterized protein OS=Homo sapiens PE=3 SV=1	4	6	35.9	20.697	181	0	60.624	5482100	5387600	94467	3.28062	3.95452	0.673897	646
O14802	DNA-directed RNA polymerase III subunit RPC1	POLR3A	sp|O14802|RPC1_HUMAN DNA-directed RNA polymerase III subunit RPC1 OS=Homo sapiens GN=POLR3A PE=1 SV=2	1	7	6.9	155.64	1390	0	43.088	181620	178480	3137.3	3.27703	-0.961292	-4.23832	94
Q16531	DNA damage-binding protein 1	DDB1	sp|Q16531|DDB1_HUMAN DNA damage-binding protein 1 OS=Homo sapiens GN=DDB1 PE=1 SV=1	1	38	38.4	126.97	1140	0	323.31	17973000	17660000	313200	3.26419	5.66729	2.4031	898
Q96BY7	Autophagy-related protein 2 homolog B	ATG2B	sp|Q96BY7|ATG2B_HUMAN Autophagy-related protein 2 homolog B OS=Homo sapiens GN=ATG2B PE=1 SV=5	1	8	5.5	232.76	2078	0	50.954	127390	125160	2232.2	3.2561	-1.47328	-4.72938	1147
Q7Z6Z7;A5YM72	E3 ubiquitin-protein ligase HUWE1	HUWE1	sp|Q7Z6Z7|HUWE1_HUMAN E3 ubiquitin-protein ligase HUWE1 OS=Homo sapiens GN=HUWE1 PE=1 SV=3	2	48	14.4	481.89	4374	0	323.31	1183100	1162300	20786	3.25216	1.74186	-1.5103	1010
P11172	Uridine 5-monophosphate synthase;Orotate phosphoribosyltransferase;Orotidine 5-phosphate decarboxylase	UMPS	sp|P11172|UMPS_HUMAN Uridine 5-monophosphate synthase OS=Homo sapiens GN=UMPS PE=1 SV=1	1	6	13.1	52.221	480	0	35.517	704510	692030	12475	3.24065	0.99378	-2.24687	323
O75489	NADH dehydrogenase [ubiquinone] iron-sulfur protein 3, mitochondrial	NDUFS3	sp|O75489|NDUS3_HUMAN NADH dehydrogenase [ubiquinone] iron-sulfur protein 3, mitochondrial OS=Homo sapiens GN=NDUFS3 PE=1 SV=1	1	6	30.7	30.241	264	0	67.27	1575900	1547800	28166	3.22705	2.15509	-1.07196	183
P62195;Q8NB90	26S protease regulatory subunit 8	PSMC5	sp|P62195|PRS8_HUMAN 26S protease regulatory subunit 8 OS=Homo sapiens GN=PSMC5 PE=1 SV=1	2	11	36	45.626	406	0	78.035	1920700	1886100	34631	3.21413	2.44028	-0.773849	662
P17980	26S protease regulatory subunit 6A	PSMC3	sp|P17980|PRS6A_HUMAN 26S protease regulatory subunit 6A OS=Homo sapiens GN=PSMC3 PE=1 SV=3	1	7	21	49.203	439	0	48.949	1290000	1266700	23270	3.21339	1.86595	-1.34744	371
Q6DN90;Q5JU85	IQ motif and SEC7 domain-containing protein 1	IQSEC1	sp|Q6DN90|IQEC1_HUMAN IQ motif and SEC7 domain-containing protein 1 OS=Homo sapiens GN=IQSEC1 PE=1 SV=1	2	9	10.7	108.31	963	0	51.801	460580	452180	8406.5	3.19618	0.379843	-2.81634	957
Q7Z3U7	Protein MON2 homolog	MON2	sp|Q7Z3U7|MON2_HUMAN Protein MON2 homolog OS=Homo sapiens GN=MON2 PE=1 SV=3	1	12	7.3	190.36	1717	0	71.703	216360	212370	3986.2	3.18235	-0.710474	-3.89283	1001
P53985	Monocarboxylate transporter 1	SLC16A1	sp|P53985|MOT1_HUMAN Monocarboxylate transporter 1 OS=Homo sapiens GN=SLC16A1 PE=1 SV=3	1	8	17.4	53.944	500	0	323.31	12786000	12543000	242520	3.13957	5.17369	2.03412	605
Q15468	SCL-interrupting locus protein	STIL	sp|Q15468|STIL_HUMAN SCL-interrupting locus protein OS=Homo sapiens GN=STIL PE=1 SV=2	1	6	6.1	142.95	1287	0	35.382	161430	158350	3087.8	3.12733	-1.13394	-4.26126	886
Q15758	Neutral amino acid transporter B(0)	SLC1A5	sp|Q15758|AAAT_HUMAN Neutral amino acid transporter B(0) OS=Homo sapiens GN=SLC1A5 PE=1 SV=2	1	1	2.2	56.598	541	0.0015564	7.0919	220610	216310	4298.6	3.10002	-0.683954	-3.78397	894
Q13435	Splicing factor 3B subunit 2	SF3B2	sp|Q13435|SF3B2_HUMAN Splicing factor 3B subunit 2 OS=Homo sapiens GN=SF3B2 PE=1 SV=2	1	10	12.3	100.23	895	0	70.864	1654100	1621600	32555	3.08533	2.22229	-0.863035	802
Q14498	RNA-binding protein 39	RBM39	sp|Q14498|RBM39_HUMAN RNA-binding protein 39 OS=Homo sapiens GN=RBM39 PE=1 SV=2	1	7	16	59.379	530	0	50.352	1405000	1377300	27691	3.08321	1.98672	-1.0965	840
Q9C0C7	Activating molecule in BECN1-regulated autophagy protein 1	AMBRA1	sp|Q9C0C7|AMRA1_HUMAN Activating molecule in BECN1-regulated autophagy protein 1 OS=Homo sapiens GN=AMBRA1 PE=1 SV=2	1	15	16	142.51	1298	0	114.24	782380	766860	15519	3.07379	1.14191	-1.93188	1255
Q9Y5V3;Q96JG8	Melanoma-associated antigen D1	MAGED1	sp|Q9Y5V3|MAGD1_HUMAN Melanoma-associated antigen D1 OS=Homo sapiens GN=MAGED1 PE=1 SV=3	2	12	18.1	86.16	778	0	305.34	2046700	2005900	40752	3.06817	2.52912	-0.539043	1479
Q9UDY4	DnaJ homolog subfamily B member 4	DNAJB4	sp|Q9UDY4|DNJB4_HUMAN DnaJ homolog subfamily B member 4 OS=Homo sapiens GN=DNAJB4 PE=1 SV=1	1	2	7.1	37.806	337	0.0010299	13.964	195090	191110	3973	3.03496	-0.86265	-3.89761	1380
P30876	DNA-directed RNA polymerase II subunit RPB2	POLR2B	sp|P30876|RPB2_HUMAN DNA-directed RNA polymerase II subunit RPB2 OS=Homo sapiens GN=POLR2B PE=1 SV=1	1	44	38.5	133.9	1174	0	323.31	6763500	6625300	138210	3.02998	4.25286	1.22288	450
P42677	40S ribosomal protein S27	RPS27	sp|P42677|RS27_HUMAN 40S ribosomal protein S27 OS=Homo sapiens GN=RPS27 PE=1 SV=3	1	6	41.7	9.461	84	0	296.39	131960000	129240000	2714700	3.02005	8.53878	5.51874	515
O60762	Dolichol-phosphate mannosyltransferase subunit 1	DPM1	sp|O60762|DPM1_HUMAN Dolichol-phosphate mannosyltransferase subunit 1 OS=Homo sapiens GN=DPM1 PE=1 SV=1	1	12	47.3	29.634	260	0	210.55	8092300	7925200	167120	3.01442	4.51132	1.4969	158
Q9H6T3	RNA polymerase II-associated protein 3	RPAP3	sp|Q9H6T3|RPAP3_HUMAN RNA polymerase II-associated protein 3 OS=Homo sapiens GN=RPAP3 PE=1 SV=2	1	4	8.4	75.718	665	0	40.17	216580	212080	4495.9	3.00679	-0.712446	-3.71923	1284
Q15334	Lethal(2) giant larvae protein homolog 1	LLGL1	sp|Q15334|L2GL1_HUMAN Lethal(2) giant larvae protein homolog 1 OS=Homo sapiens GN=LLGL1 PE=1 SV=3	1	3	3.4	115.42	1064	0	18.17	90514	88632	1882.1	3.00434	-1.97116	-4.9755	875
Q9ULX6	A-kinase anchor protein 8-like	AKAP8L	sp|Q9ULX6|AKP8L_HUMAN A-kinase anchor protein 8-like OS=Homo sapiens GN=AKAP8L PE=1 SV=3	1	9	18.9	71.648	646	0	79.871	2892400	2831900	60511	2.99536	3.02664	0.0312834	1412
Q15370	Transcription elongation factor B polypeptide 2	TCEB2	sp|Q15370|ELOB_HUMAN Transcription elongation factor B polypeptide 2 OS=Homo sapiens GN=TCEB2 PE=1 SV=1	1	8	58.5	13.133	118	0	54.544	4305300	4214300	91085	2.97887	3.60017	0.6213	879
P43307	Translocon-associated protein subunit alpha	SSR1	sp|P43307|SSRA_HUMAN Translocon-associated protein subunit alpha OS=Homo sapiens GN=SSR1 PE=1 SV=3	1	2	6.6	32.235	286	0.0010438	15.345	1842000	1803000	38977	2.97856	2.37527	-0.603291	524
Q99460	26S proteasome non-ATPase regulatory subunit 1	PSMD1	sp|Q99460|PSMD1_HUMAN 26S proteasome non-ATPase regulatory subunit 1 OS=Homo sapiens GN=PSMD1 PE=1 SV=2	1	12	14	105.84	953	0	74.621	975010	954260	20751	2.97006	1.45733	-1.51273	1187
Q9Y4R8	Telomere length regulation protein TEL2 homolog	TELO2	sp|Q9Y4R8|TELO2_HUMAN Telomere length regulation protein TEL2 homolog OS=Homo sapiens GN=TELO2 PE=1 SV=2	1	9	13.1	91.746	837	0	54.915	531760	520200	11560	2.93878	0.582012	-2.35677	1468
Q15047	Histone-lysine N-methyltransferase SETDB1	SETDB1	sp|Q15047|SETB1_HUMAN Histone-lysine N-methyltransferase SETDB1 OS=Homo sapiens GN=SETDB1 PE=1 SV=1	1	3	3.3	143.16	1291	0	16.818	52975	51820	1155.1	2.93435	-2.74547	-5.67982	865
P14735	Insulin-degrading enzyme	IDE	sp|P14735|IDE_HUMAN Insulin-degrading enzyme OS=Homo sapiens GN=IDE PE=1 SV=4	1	3	3.3	117.97	1019	0	16.933	96207	94104	2102.4	2.93108	-1.88473	-4.8158	353
Q96R06;E9PMD0	Sperm-associated antigen 5	SPAG5	sp|Q96R06|SPAG5_HUMAN Sperm-associated antigen 5 OS=Homo sapiens GN=SPAG5 PE=1 SV=2	2	3	3.2	134.42	1193	0	17.378	98046	95892	2153.6	2.92352	-1.85757	-4.78109	1176
O75190;Q8WWF6;Q8NHS0;Q7Z6W7	DnaJ homolog subfamily B member 6	DNAJB6	sp|O75190|DNJB6_HUMAN DnaJ homolog subfamily B member 6 OS=Homo sapiens GN=DNAJB6 PE=1 SV=2	4	8	27.3	36.087	326	0	110.97	7263200	7101600	161630	2.90431	4.35302	1.44871	169
P54709	Sodium/potassium-transporting ATPase subunit beta-3	ATP1B3	sp|P54709|AT1B3_HUMAN Sodium/potassium-transporting ATPase subunit beta-3 OS=Homo sapiens GN=ATP1B3 PE=1 SV=1	1	4	18.3	31.512	279	0	29.228	1700400	1662500	37879	2.90274	2.25823	-0.644516	613
Q8IUD2;O15083	ELKS/Rab6-interacting/CAST family member 1	ERC1	sp|Q8IUD2|RB6I2_HUMAN ELKS/Rab6-interacting/CAST family member 1 OS=Homo sapiens GN=ERC1 PE=1 SV=1	2	3	3.1	128.08	1116	0	22.187	59310	57988	1322.2	2.90167	-2.58323	-5.4849	1028
O15397	Importin-8	IPO8	sp|O15397|IPO8_HUMAN Importin-8 OS=Homo sapiens GN=IPO8 PE=1 SV=2	1	4	4.8	119.94	1037	0	32.455	105500	103140	2361.1	2.89593	-1.75245	-4.64838	115
P19367;Q2TB90	Hexokinase-1	HK1	sp|P19367|HXK1_HUMAN Hexokinase-1 OS=Homo sapiens GN=HK1 PE=1 SV=3	2	13	15.8	102.48	917	0	58.809	665190	650200	14989	2.88584	0.90383	-1.98201	378
P57740	Nuclear pore complex protein Nup107	NUP107	sp|P57740|NU107_HUMAN Nuclear pore complex protein Nup107 OS=Homo sapiens GN=NUP107 PE=1 SV=1	1	13	15.9	106.37	925	0	98.651	1071600	1047200	24437	2.86826	1.59141	-1.27685	629
Q96T76	MMS19 nucleotide excision repair protein homolog	MMS19	sp|Q96T76|MMS19_HUMAN MMS19 nucleotide excision repair protein homolog OS=Homo sapiens GN=MMS19 PE=1 SV=2	1	2	2.3	113.29	1030	0.0010428	15.164	72904	71204	1699.9	2.83537	-2.28702	-5.12239	1183
P61619;Q9H9S3	Protein transport protein Sec61 subunit alpha isoform 1	SEC61A1	sp|P61619|S61A1_HUMAN Protein transport protein Sec61 subunit alpha isoform 1 OS=Homo sapiens GN=SEC61A1 PE=1 SV=2	2	9	24.8	52.264	476	0	96.724	6115600	5971900	143700	2.82399	4.10306	1.27907	651
P55884	Eukaryotic translation initiation factor 3 subunit B	EIF3B	sp|P55884|EIF3B_HUMAN Eukaryotic translation initiation factor 3 subunit B OS=Homo sapiens GN=EIF3B PE=1 SV=3	1	27	44.6	92.48	814	0	323.31	10984000	10725000	258380	2.82227	4.94778	2.12551	624
P48556	26S proteasome non-ATPase regulatory subunit 8	PSMD8	sp|P48556|PSMD8_HUMAN 26S proteasome non-ATPase regulatory subunit 8 OS=Homo sapiens GN=PSMD8 PE=1 SV=2	1	6	18.9	39.611	350	0	85.173	1751500	1709500	41988	2.79438	2.29845	-0.495936	550
P28288	ATP-binding cassette sub-family D member 3	ABCD3	sp|P28288|ABCD3_HUMAN ATP-binding cassette sub-family D member 3 OS=Homo sapiens GN=ABCD3 PE=1 SV=1	1	9	14.9	75.475	659	0	75.22	995660	971740	23918	2.79133	1.48352	-1.30782	438
P11717	Cation-independent mannose-6-phosphate receptor	IGF2R	sp|P11717|MPRI_HUMAN Cation-independent mannose-6-phosphate receptor OS=Homo sapiens GN=IGF2R PE=1 SV=3	1	3	1.3	274.37	2491	0	16.721	17492	17069	422.34	2.78376	-4.3476	-7.13136	329
O95602	DNA-directed RNA polymerase I subunit RPA1	POLR1A	sp|O95602|RPA1_HUMAN DNA-directed RNA polymerase I subunit RPA1 OS=Homo sapiens GN=POLR1A PE=1 SV=2	1	13	9.8	194.81	1720	0	100.33	434420	423800	10618	2.76573	0.286329	-2.4794	225
O00303	Eukaryotic translation initiation factor 3 subunit F	EIF3F	sp|O00303|EIF3F_HUMAN Eukaryotic translation initiation factor 3 subunit F OS=Homo sapiens GN=EIF3F PE=1 SV=1	1	5	18.8	37.563	357	0	34.123	1341900	1308800	33040	2.75482	1.91312	-0.841701	73
Q15042	Rab3 GTPase-activating protein catalytic subunit	RAB3GAP1	sp|Q15042|RB3GP_HUMAN Rab3 GTPase-activating protein catalytic subunit OS=Homo sapiens GN=RAB3GAP1 PE=1 SV=3	1	10	13.4	110.52	981	0	113.46	513790	501120	12675	2.75203	0.528103	-2.22393	863
Q53GQ0	Very-long-chain 3-oxoacyl-CoA reductase	HSD17B12	sp|Q53GQ0|DHB12_HUMAN Very-long-chain 3-oxoacyl-CoA reductase OS=Homo sapiens GN=HSD17B12 PE=1 SV=2	1	9	36.2	34.324	312	0	144.87	6391200	6231800	159360	2.73622	4.16452	1.4283	918
Q9NZ01	Very-long-chain enoyl-CoA reductase	TECR	sp|Q9NZ01|TECR_HUMAN Very-long-chain enoyl-CoA reductase OS=Homo sapiens GN=TECR PE=1 SV=1	1	11	27.6	36.034	308	0	170.17	10153000	9898700	253910	2.73178	4.83211	2.10033	1351
Q8TCN5	Zinc finger protein 507	ZNF507	sp|Q8TCN5|ZN507_HUMAN Zinc finger protein 507 OS=Homo sapiens GN=ZNF507 PE=1 SV=2	1	7	11.3	105.77	953	0	49.11	341310	332770	8540.5	2.73099	-0.0625286	-2.79352	1091
Q2NKX8	DNA excision repair protein ERCC-6-like	ERCC6L	sp|Q2NKX8|ERC6L_HUMAN DNA excision repair protein ERCC-6-like OS=Homo sapiens GN=ERCC6L PE=1 SV=1	1	7	6.8	141.1	1250	0	48.88	179630	175110	4516.1	2.72397	-0.988792	-3.71276	909
Q5SRE5;H7C4K7	Nucleoporin NUP188 homolog	NUP188	sp|Q5SRE5|NU188_HUMAN Nucleoporin NUP188 homolog OS=Homo sapiens GN=NUP188 PE=1 SV=1	2	6	3.8	196.04	1749	0	39.621	177590	173080	4505.5	2.71054	-1.00562	-3.71616	930
O60341	Lysine-specific histone demethylase 1A	KDM1A	sp|O60341|KDM1A_HUMAN Lysine-specific histone demethylase 1A OS=Homo sapiens GN=KDM1A PE=1 SV=2	1	10	16	92.902	852	0	67.001	761960	742560	19404	2.70501	1.09545	-1.60956	152
P28340	DNA polymerase delta catalytic subunit	POLD1	sp|P28340|DPOD1_HUMAN DNA polymerase delta catalytic subunit OS=Homo sapiens GN=POLD1 PE=1 SV=2	1	5	5.3	123.63	1107	0	30.213	115040	112110	2931	2.70431	-1.63214	-4.33645	439
O95229	ZW10 interactor	ZWINT	sp|O95229|ZWINT_HUMAN ZW10 interactor OS=Homo sapiens GN=ZWINT PE=1 SV=2	1	11	49.5	31.293	277	0	119.92	3894600	3794700	99901	2.69427	3.44886	0.754585	213
Q63ZY3	KN motif and ankyrin repeat domain-containing protein 2	KANK2	sp|Q63ZY3|KANK2_HUMAN KN motif and ankyrin repeat domain-containing protein 2 OS=Homo sapiens GN=KANK2 PE=1 SV=1	1	4	6.8	91.173	851	0	26.582	111930	109040	2888.9	2.68512	-1.6722	-4.35732	948
Q9Y5M8	Signal recognition particle receptor subunit beta	SRPRB	sp|Q9Y5M8|SRPRB_HUMAN Signal recognition particle receptor subunit beta OS=Homo sapiens GN=SRPRB PE=1 SV=3	1	6	28	29.702	271	0	38.631	888150	864880	23269	2.66295	1.31545	-1.3475	1475
Q9UBB6	Neurochondrin	NCDN	sp|Q9UBB6|NCDN_HUMAN Neurochondrin OS=Homo sapiens GN=NCDN PE=1 SV=1	1	4	6.9	78.863	729	0	24.35	246930	240370	6565.5	2.64114	-0.531797	-3.17294	1371
P43246	DNA mismatch repair protein Msh2	MSH2	sp|P43246|MSH2_HUMAN DNA mismatch repair protein Msh2 OS=Homo sapiens GN=MSH2 PE=1 SV=1	1	14	16.6	104.74	934	0	112.34	1267000	1233300	33695	2.64078	1.8274	-0.813379	523
Q7Z401	C-myc promoter-binding protein	DENND4A	sp|Q7Z401|MYCPP_HUMAN C-myc promoter-binding protein OS=Homo sapiens GN=DENND4A PE=1 SV=2	1	3	2	209.24	1863	0	17.231	41472	40367	1105	2.63799	-3.10581	-5.7438	1002
Q13885	Tubulin beta-2A chain	TUBB2A	sp|Q13885|TBB2A_HUMAN Tubulin beta-2A chain OS=Homo sapiens GN=TUBB2A PE=1 SV=1	1	23	62.5	49.906	445	0	39.115	1015300	988250	27056	2.63779	1.50782	-1.12997	819
P68371;Q3ZCM7	Tubulin beta-4B chain	TUBB4B	sp|P68371|TBB4B_HUMAN Tubulin beta-4B chain OS=Homo sapiens GN=TUBB4B PE=1 SV=1	2	24	66.3	49.83	445	0	323.31	520320000	506360000	13962000	2.62752	10.5089	7.88138	709
O75792	Ribonuclease H2 subunit A	RNASEH2A	sp|O75792|RNH2A_HUMAN Ribonuclease H2 subunit A OS=Homo sapiens GN=RNASEH2A PE=1 SV=2	1	7	28.8	33.395	299	0	41	863940	840680	23260	2.62257	1.2745	-1.34806	192
Q6P2H3	Centrosomal protein of 85 kDa	CEP85	sp|Q6P2H3|CEP85_HUMAN Centrosomal protein of 85 kDa OS=Homo sapiens GN=CEP85 PE=1 SV=1	1	4	6.2	85.638	762	0	23.294	218200	212290	5914.8	2.6125	-0.711018	-3.32351	965
A7E2V4	Zinc finger SWIM domain-containing protein 8	ZSWIM8	sp|A7E2V4|ZSWM8_HUMAN Zinc finger SWIM domain-containing protein 8 OS=Homo sapiens GN=ZSWIM8 PE=1 SV=1	1	2	1.5	197.3	1837	0.00086059	11.061	27729	26973	755.46	2.60495	-3.68747	-6.29241	18
Q13263	Transcription intermediary factor 1-beta	TRIM28	sp|Q13263|TIF1B_HUMAN Transcription intermediary factor 1-beta OS=Homo sapiens GN=TRIM28 PE=1 SV=5	1	19	26.3	88.549	835	0	323.31	5876200	5716000	160200	2.60399	4.03988	1.43589	797
O15067	Phosphoribosylformylglycinamidine synthase	PFAS	sp|O15067|PUR4_HUMAN Phosphoribosylformylglycinamidine synthase OS=Homo sapiens GN=PFAS PE=1 SV=4	1	7	7.4	144.73	1338	0	54.918	408250	397060	11192	2.59575	0.192303	-2.40345	106
Q9HC35	Echinoderm microtubule-associated protein-like 4	EML4	sp|Q9HC35|EMAL4_HUMAN Echinoderm microtubule-associated protein-like 4 OS=Homo sapiens GN=EML4 PE=1 SV=3	1	3	3.7	108.91	981	0	20.503	76326	74225	2100.5	2.59003	-2.22708	-4.81711	1297
O43175	D-3-phosphoglycerate dehydrogenase	PHGDH	sp|O43175|SERA_HUMAN D-3-phosphoglycerate dehydrogenase OS=Homo sapiens GN=PHGDH PE=1 SV=4	1	11	23.3	56.65	533	0	172.05	3224500	3135600	88888	2.58754	3.17362	0.586075	121
Q00325	Phosphate carrier protein, mitochondrial	SLC25A3	sp|Q00325|MPCP_HUMAN Phosphate carrier protein, mitochondrial OS=Homo sapiens GN=SLC25A3 PE=1 SV=2	1	16	41.4	40.094	362	0	323.31	33303000	32384000	919010	2.58599	6.54208	3.95609	724
O00231	26S proteasome non-ATPase regulatory subunit 11	PSMD11	sp|O00231|PSD11_HUMAN 26S proteasome non-ATPase regulatory subunit 11 OS=Homo sapiens GN=PSMD11 PE=1 SV=3	1	10	28.7	47.463	422	0	105.84	1329200	1292500	36709	2.58482	1.89504	-0.68978	71
Q5VZK9	Leucine-rich repeat-containing protein 16A	LRRC16A	sp|Q5VZK9|CARL1_HUMAN F-actin-uncapping protein LRRC16A OS=Homo sapiens GN=LRRC16A PE=1 SV=1	1	2	2	151.56	1371	0.00092336	11.719	90076	87586	2490.7	2.58301	-1.98828	-4.57129	946
Q9Y6K0	Choline/ethanolaminephosphotransferase 1	CEPT1	sp|Q9Y6K0|CEPT1_HUMAN Choline/ethanolaminephosphotransferase 1 OS=Homo sapiens GN=CEPT1 PE=1 SV=1	1	1	2.6	46.553	416	0.0016353	9.046	2617000	2544600	72408	2.58208	2.87231	0.290236	1489
P41091;Q2VIR3;F8W810	Eukaryotic translation initiation factor 2 subunit 3;Putative eukaryotic translation initiation factor 2 subunit 3-like protein	EIF2S3;EIF2S3L	sp|P41091|IF2G_HUMAN Eukaryotic translation initiation factor 2 subunit 3 OS=Homo sapiens GN=EIF2S3 PE=1 SV=3;sp|Q2VIR3|IF2GL_HUMAN Putative eukaryotic translation initiation factor 2 subunit 3-like protein OS=Homo sapiens GN=EIF2S3L PE=5 SV=2;tr|F8W810|F8	3	17	51.3	51.109	472	0	323.31	7951400	7730700	220640	2.57776	4.47547	1.89771	507
P40937	Replication factor C subunit 5	RFC5	sp|P40937|RFC5_HUMAN Replication factor C subunit 5 OS=Homo sapiens GN=RFC5 PE=1 SV=1	1	3	10.9	38.496	340	0	18.495	479900	466360	13544	2.55265	0.424391	-2.12826	504
Q9UPN7	Serine/threonine-protein phosphatase 6 regulatory subunit 1	PPP6R1	sp|Q9UPN7|PP6R1_HUMAN Serine/threonine-protein phosphatase 6 regulatory subunit 1 OS=Homo sapiens GN=PPP6R1 PE=1 SV=5	1	6	8.2	96.723	881	0	53.824	485170	471460	13711	2.55066	0.440081	-2.11058	1426
Q58FF8	Putative heat shock protein HSP 90-beta 2	HSP90AB2P	sp|Q58FF8|H90B2_HUMAN Putative heat shock protein HSP 90-beta 2 OS=Homo sapiens GN=HSP90AB2P PE=1 SV=2	1	8	16.8	44.348	381	0	191.82	2394800	2327100	67735	2.54942	2.74341	0.193987	921
Q9BWH6	RNA polymerase II-associated protein 1	RPAP1	sp|Q9BWH6|RPAP1_HUMAN RNA polymerase II-associated protein 1 OS=Homo sapiens GN=RPAP1 PE=1 SV=3	1	2	1.9	152.75	1393	0.00090253	11.501	43012	41787	1225.9	2.53807	-3.05593	-5.594	1240
P50570;Q05193;Q9UQ16	Dynamin-2	DNM2	sp|P50570|DYN2_HUMAN Dynamin-2 OS=Homo sapiens GN=DNM2 PE=1 SV=2	3	8	10.1	98.063	870	0	58.774	421840	409710	12137	2.52405	0.237549	-2.2865	571
O94927	HAUS augmin-like complex subunit 5	HAUS5	sp|O94927|HAUS5_HUMAN HAUS augmin-like complex subunit 5 OS=Homo sapiens GN=HAUS5 PE=1 SV=2	1	5	10.3	71.682	633	0	27.986	211900	205790	6104	2.52221	-0.75588	-3.27809	205
P08574	Cytochrome c1, heme protein, mitochondrial	CYC1	sp|P08574|CY1_HUMAN Cytochrome c1, heme protein, mitochondrial OS=Homo sapiens GN=CYC1 PE=1 SV=3	1	2	8.6	35.422	325	0.00094251	11.854	185010	179640	5374.2	2.50985	-0.951946	-3.46179	300
A0A0A6YYL6;P18621	60S ribosomal protein L17	RPL17-C18orf32;RPL17	tr|A0A0A6YYL6|A0A0A6YYL6_HUMAN Protein RPL17-C18orf32 OS=Homo sapiens GN=RPL17-C18orf32 PE=3 SV=1;sp|P18621|RL17_HUMAN 60S ribosomal protein L17 OS=Homo sapiens GN=RPL17 PE=1 SV=3	2	3	17.5	26.372	228	0	38.434	2678600	2599000	79613	2.47574	2.90283	0.42709	4
E7ENQ6;Q9P0J0	NADH dehydrogenase [ubiquinone] 1 alpha subcomplex subunit 13	NDUFA13	tr|E7ENQ6|E7ENQ6_HUMAN Uncharacterized protein OS=Homo sapiens PE=4 SV=1;sp|Q9P0J0|NDUAD_HUMAN NADH dehydrogenase [ubiquinone] 1 alpha subcomplex subunit 13 OS=Homo sapiens GN=NDUFA13 PE=1 SV=3	2	2	9.2	30.095	273	0.00096712	12.197	977190	948070	29121	2.47179	1.44794	-1.02385	60
P49720	Proteasome subunit beta type-3	PSMB3	sp|P49720|PSB3_HUMAN Proteasome subunit beta type-3 OS=Homo sapiens GN=PSMB3 PE=1 SV=2	1	4	26.8	22.949	205	0	69.699	1671700	1621900	49821	2.47172	2.22256	-0.24916	562
P52948	Nuclear pore complex protein Nup98-Nup96;Nuclear pore complex protein Nup98;Nuclear pore complex protein Nup96	NUP98	sp|P52948|NUP98_HUMAN Nuclear pore complex protein Nup98-Nup96 OS=Homo sapiens GN=NUP98 PE=1 SV=4	1	5	2.7	197.58	1817	0	27.931	69812	67716	2095.2	2.46127	-2.35949	-4.82075	598
O75643	U5 small nuclear ribonucleoprotein 200 kDa helicase	SNRNP200	sp|O75643|U520_HUMAN U5 small nuclear ribonucleoprotein 200 kDa helicase OS=Homo sapiens GN=SNRNP200 PE=1 SV=2	1	44	24.2	244.5	2136	0	323.31	1607500	1559200	48314	2.45915	2.16568	-0.293472	187
O60318	Germinal-center associated nuclear protein	MCM3AP	sp|O60318|GANP_HUMAN Germinal-center associated nuclear protein OS=Homo sapiens GN=MCM3AP PE=1 SV=2	1	3	2.3	218.4	1980	0	16.844	79311	76917	2394	2.45274	-2.17568	-4.62842	150
O43683	Mitotic checkpoint serine/threonine-protein kinase BUB1	BUB1	sp|O43683|BUB1_HUMAN Mitotic checkpoint serine/threonine-protein kinase BUB1 OS=Homo sapiens GN=BUB1 PE=1 SV=1	1	6	8	122.37	1085	0	37.79	259980	252110	7861.1	2.45011	-0.463001	-2.91311	133
P49588	Alanine--tRNA ligase, cytoplasmic	AARS	sp|P49588|SYAC_HUMAN Alanine--tRNA ligase, cytoplasmic OS=Homo sapiens GN=AARS PE=1 SV=2	1	11	15.3	106.81	968	0	72.541	620450	601370	19086	2.4246	0.791199	-1.6334	558
Q9Y4W2	Ribosomal biogenesis protein LAS1L	LAS1L	sp|Q9Y4W2|LAS1L_HUMAN Ribosomal biogenesis protein LAS1L OS=Homo sapiens GN=LAS1L PE=1 SV=2	1	4	8.6	83.064	734	0	24.825	302700	293250	9457.9	2.4014	-0.244923	-2.64632	1469
O95373	Importin-7	IPO7	sp|O95373|IPO7_HUMAN Importin-7 OS=Homo sapiens GN=IPO7 PE=1 SV=1	1	7	8.7	119.52	1038	0	95.848	690920	669250	21672	2.39557	0.945492	-1.45008	216
Q9Y5Q9	General transcription factor 3C polypeptide 3	GTF3C3	sp|Q9Y5Q9|TF3C3_HUMAN General transcription factor 3C polypeptide 3 OS=Homo sapiens GN=GTF3C3 PE=1 SV=1	1	14	19.8	101.27	886	0	146.37	1275700	1235600	40107	2.39215	1.83009	-0.562059	1477
Q9UHY1	Nuclear receptor-binding protein	NRBP1	sp|Q9UHY1|NRBP_HUMAN Nuclear receptor-binding protein OS=Homo sapiens GN=NRBP1 PE=1 SV=1	1	4	10.1	59.844	535	0	29.916	1591300	1540900	50316	2.38354	2.14865	-0.234897	1392
Q7L576;Q96F07	Cytoplasmic FMR1-interacting protein 1;Cytoplasmic FMR1-interacting protein 2	CYFIP1;CYFIP2	sp|Q7L576|CYFP1_HUMAN Cytoplasmic FMR1-interacting protein 1 OS=Homo sapiens GN=CYFIP1 PE=1 SV=1;sp|Q96F07|CYFP2_HUMAN Cytoplasmic FMR1-interacting protein 2 OS=Homo sapiens GN=CYFIP2 PE=1 SV=2	2	7	5.7	145.18	1253	0	49.507	188880	182900	5978.5	2.38206	-0.925999	-3.30806	994
Q9NX63	MICOS complex subunit MIC19	CHCHD3	sp|Q9NX63|MIC19_HUMAN MICOS complex subunit MIC19 OS=Homo sapiens GN=CHCHD3 PE=1 SV=1	1	3	15	26.152	227	0	23.114	859600	832390	27216	2.38167	1.26021	-1.12146	1343
P40616	ADP-ribosylation factor-like protein 1	ARL1	sp|P40616|ARL1_HUMAN ADP-ribosylation factor-like protein 1 OS=Homo sapiens GN=ARL1 PE=1 SV=1	1	2	11	20.417	181	0.00096993	12.327	698710	676510	22192	2.37693	0.961058	-1.41587	502
Q92540	Protein SMG7	SMG7	sp|Q92540|SMG7_HUMAN Protein SMG7 OS=Homo sapiens GN=SMG7 PE=1 SV=2	1	6	5.4	127.28	1137	0	42.984	308590	298790	9804.1	2.37653	-0.217922	-2.59446	1120
Q9UNY4	Transcription termination factor 2	TTF2	sp|Q9UNY4|TTF2_HUMAN Transcription termination factor 2 OS=Homo sapiens GN=TTF2 PE=1 SV=2	1	10	12.7	129.59	1162	0	60.716	359430	347960	11477	2.36904	0.00186729	-2.36717	1424
Q15386	Ubiquitin-protein ligase E3C	UBE3C	sp|Q15386|UBE3C_HUMAN Ubiquitin-protein ligase E3C OS=Homo sapiens GN=UBE3C PE=1 SV=3	1	2	2.7	123.92	1083	0.00098328	12.6	44109	42693	1415.9	2.36114	-3.02498	-5.38612	880
Q9Y4E8;Q13107	Ubiquitin carboxyl-terminal hydrolase 15	USP15	sp|Q9Y4E8|UBP15_HUMAN Ubiquitin carboxyl-terminal hydrolase 15 OS=Homo sapiens GN=USP15 PE=1 SV=3	2	6	6.9	112.42	981	0	37.123	209790	203020	6763.2	2.3547	-0.775433	-3.13014	1462
Q9NYF8	Bcl-2-associated transcription factor 1	BCLAF1	sp|Q9NYF8|BCLF1_HUMAN Bcl-2-associated transcription factor 1 OS=Homo sapiens GN=BCLAF1 PE=1 SV=2	1	2	2.7	106.12	920	0.00094518	11.877	94549	91469	3079.5	2.33945	-1.9257	-4.26515	1349
P68363;P68366;Q9H853	Tubulin alpha-1B chain;Tubulin alpha-4A chain	TUBA1B;TUBA4A	sp|P68363|TBA1B_HUMAN Tubulin alpha-1B chain OS=Homo sapiens GN=TUBA1B PE=1 SV=1;sp|P68366|TBA4A_HUMAN Tubulin alpha-4A chain OS=Homo sapiens GN=TUBA4A PE=1 SV=1	3	28	68.7	50.151	451	0	323.31	497190000	480990000	16197000	2.33914	10.4347	8.0956	708
Q93008;O00507	Probable ubiquitin carboxyl-terminal hydrolase FAF-X	USP9X	sp|Q93008|USP9X_HUMAN Probable ubiquitin carboxyl-terminal hydrolase FAF-X OS=Homo sapiens GN=USP9X PE=1 SV=3	2	15	8.5	292.28	2570	0	133.2	296030	286320	9709.2	2.32906	-0.279425	-2.60849	1137
P30153;P30154	Serine/threonine-protein phosphatase 2A 65 kDa regulatory subunit A alpha isoform	PPP2R1A	sp|P30153|2AAA_HUMAN Serine/threonine-protein phosphatase 2A 65 kDa regulatory subunit A alpha isoform OS=Homo sapiens GN=PPP2R1A PE=1 SV=4	2	11	23.9	65.308	589	0	75.822	1307000	1264100	42879	2.32863	1.86299	-0.465643	448
P35580	Myosin-10	MYH10	sp|P35580|MYH10_HUMAN Myosin-10 OS=Homo sapiens GN=MYH10 PE=1 SV=3	1	13	7.7	229	1976	0	34.844	60923	58920	2003.1	2.32538	-2.56022	-4.88561	480
Q9UBX3;B4DLN1	Mitochondrial dicarboxylate carrier	SLC25A10	sp|Q9UBX3|DIC_HUMAN Mitochondrial dicarboxylate carrier OS=Homo sapiens GN=SLC25A10 PE=1 SV=2;tr|B4DLN1|B4DLN1_HUMAN Uncharacterized protein OS=Homo sapiens PE=2 SV=1	2	6	25.1	31.282	287	0	41.639	1721500	1664500	56990	2.31517	2.25996	-0.0552053	1378
P26639	Threonine--tRNA ligase, cytoplasmic	TARS	sp|P26639|SYTC_HUMAN Threonine--tRNA ligase, cytoplasmic OS=Homo sapiens GN=TARS PE=1 SV=3	1	13	21.7	83.434	723	0	108.98	2482100	2399700	82399	2.31101	2.78773	0.476713	428
Q8N7H5	RNA polymerase II-associated factor 1 homolog	PAF1	sp|Q8N7H5|PAF1_HUMAN RNA polymerase II-associated factor 1 homolog OS=Homo sapiens GN=PAF1 PE=1 SV=2	1	3	7	59.975	531	0	22.939	190120	183750	6366.1	2.29812	-0.91931	-3.21743	1061
Q13200	26S proteasome non-ATPase regulatory subunit 2	PSMD2	sp|Q13200|PSMD2_HUMAN 26S proteasome non-ATPase regulatory subunit 2 OS=Homo sapiens GN=PSMD2 PE=1 SV=3	1	27	38.2	100.2	908	0	323.31	5154700	4981700	173050	2.29431	3.84151	1.5472	794
Q15021;REV__Q02790	Condensin complex subunit 1	NCAPD2	sp|Q15021|CND1_HUMAN Condensin complex subunit 1 OS=Homo sapiens GN=NCAPD2 PE=1 SV=3	2	15	12.7	157.18	1401	0	106.4	597260	577110	20147	2.28714	0.731792	-1.55535	860
Q9HCN4	GPN-loop GTPase 1	GPN1	sp|Q9HCN4|GPN1_HUMAN GPN-loop GTPase 1 OS=Homo sapiens GN=GPN1 PE=1 SV=1	1	3	10.7	41.74	374	0	43.872	494170	477430	16740	2.28085	0.458235	-1.82261	1300
O75147	Obscurin-like protein 1	OBSL1	sp|O75147|OBSL1_HUMAN Obscurin-like protein 1 OS=Homo sapiens GN=OBSL1 PE=1 SV=4	1	2	1.3	206.94	1896	0.00089445	11.387	37575	36301	1274	2.2795	-3.25897	-5.53848	163
Q5VYK3	Proteasome-associated protein ECM29 homolog	ECM29	sp|Q5VYK3|ECM29_HUMAN Proteasome-associated protein ECM29 homolog OS=Homo sapiens GN=ECM29 PE=1 SV=2	1	15	10.5	204.29	1845	0	94.813	601700	581230	20471	2.27439	0.742056	-1.53233	945
Q99570	Phosphoinositide 3-kinase regulatory subunit 4	PIK3R4	sp|Q99570|PI3R4_HUMAN Phosphoinositide 3-kinase regulatory subunit 4 OS=Homo sapiens GN=PIK3R4 PE=1 SV=3	1	3	3.1	153.1	1358	0	19.689	69243	66866	2376.5	2.2613	-2.37771	-4.639	1190
P10809	60 kDa heat shock protein, mitochondrial	HSPD1	sp|P10809|CH60_HUMAN 60 kDa heat shock protein, mitochondrial OS=Homo sapiens GN=HSPD1 PE=1 SV=2	1	19	39.8	61.054	573	0	311.4	5410100	5224000	186060	2.25825	3.91003	1.65178	319
P07339;H7C469	Cathepsin D;Cathepsin D light chain;Cathepsin D heavy chain	CTSD	sp|P07339|CATD_HUMAN Cathepsin D OS=Homo sapiens GN=CTSD PE=1 SV=1;tr|H7C469|H7C469_HUMAN Uncharacterized protein (Fragment) OS=Homo sapiens PE=1 SV=6	2	6	18	44.552	412	0	89.217	2360400	2278700	81679	2.24903	2.71309	0.464052	289
P04259;CON__P05787;P05787;CON__H-INV:HIT000292931	Keratin, type II cytoskeletal 6B	KRT6B	sp|P04259|K2C6B_HUMAN Keratin, type II cytoskeletal 6B OS=Homo sapiens GN=KRT6B PE=1 SV=5	4	31	42.6	60.066	564	0	83.034	3450700	3330900	119740	2.24487	3.26079	1.01592	258
Q5JWF2;P38405;P11488;P63096;P19087;P09471;P08754;A8MTJ3;P04899	Guanine nucleotide-binding protein G(s) subunit alpha isoforms XLas	GNAS	sp|Q5JWF2|GNAS1_HUMAN Guanine nucleotide-binding protein G(s) subunit alpha isoforms XLas OS=Homo sapiens GN=GNAS PE=1 SV=2	9	11	10.7	111.02	1037	0	154.32	2921700	2820200	101450	2.24389	3.02067	0.776783	929
P07437;A6NNZ2;CON__ENSEMBL:ENSBTAP00000025008;Q9H4B7	Tubulin beta chain	TUBB	sp|P07437|TBB5_HUMAN Tubulin beta chain OS=Homo sapiens GN=TUBB PE=1 SV=2	4	23	62.6	49.67	444	0	323.31	138890000	133950000	4937400	2.20873	8.59043	6.38169	291
P53621	Coatomer subunit alpha;Xenin;Proxenin	COPA	sp|P53621|COPA_HUMAN Coatomer subunit alpha OS=Homo sapiens GN=COPA PE=1 SV=2	1	18	18.4	138.34	1224	0	152.02	888900	857220	31673	2.20527	1.30261	-0.90266	603
Q9NNW5	WD repeat-containing protein 6	WDR6	sp|Q9NNW5|WDR6_HUMAN WD repeat-containing protein 6 OS=Homo sapiens GN=WDR6 PE=1 SV=1	1	11	12.8	121.72	1121	0	70.086	596120	574700	21417	2.19291	0.725756	-1.46716	1305
Q5VIR6	Vacuolar protein sorting-associated protein 53 homolog	VPS53	sp|Q5VIR6|VPS53_HUMAN Vacuolar protein sorting-associated protein 53 homolog OS=Homo sapiens GN=VPS53 PE=1 SV=1	1	2	2.6	79.652	699	0.0008658	11.102	69566	67041	2525.2	2.17751	-2.37394	-4.55144	942
P54819	Adenylate kinase 2, mitochondrial;Adenylate kinase 2, mitochondrial, N-terminally processed	AK2	sp|P54819|KAD2_HUMAN Adenylate kinase 2, mitochondrial OS=Homo sapiens GN=AK2 PE=1 SV=2	1	4	25.1	26.477	239	0	26.014	1009900	972890	36965	2.16498	1.48522	-0.679754	614
P22102	Trifunctional purine biosynthetic protein adenosine-3;Phosphoribosylamine--glycine ligase;Phosphoribosylformylglycinamidine cyclo-ligase;Phosphoribosylglycinamide formyltransferase	GART	sp|P22102|PUR2_HUMAN Trifunctional purine biosynthetic protein adenosine-3 OS=Homo sapiens GN=GART PE=1 SV=1	1	27	30.5	107.77	1010	0	256.04	4758200	4583800	174410	2.16292	3.72142	1.5585	396
M0QZK8;O75223	Gamma-glutamylcyclotransferase	GGCT	tr|M0QZK8|M0QZK8_HUMAN Uncharacterized protein OS=Homo sapiens PE=4 SV=1;sp|O75223|GGCT_HUMAN Gamma-glutamylcyclotransferase OS=Homo sapiens GN=GGCT PE=1 SV=1	2	3	32	11.578	103	0	18.888	1576700	1518700	57918	2.15961	2.12771	-0.0319023	67
P39023	60S ribosomal protein L3	RPL3	sp|P39023|RL3_HUMAN 60S ribosomal protein L3 OS=Homo sapiens GN=RPL3 PE=1 SV=2	1	3	12.4	46.108	403	0	21.043	688220	662840	25379	2.15388	0.931606	-1.22228	497
Q5H9R7	Serine/threonine-protein phosphatase 6 regulatory subunit 3	PPP6R3	sp|Q5H9R7|PP6R3_HUMAN Serine/threonine-protein phosphatase 6 regulatory subunit 3 OS=Homo sapiens GN=PPP6R3 PE=1 SV=2	1	12	18	97.668	873	0	117.26	908110	874500	33610	2.14843	1.3314	-0.817023	924
Q9NXH9	tRNA (guanine(26)-N(2))-dimethyltransferase	TRMT1	sp|Q9NXH9|TRM1_HUMAN tRNA (guanine(26)-N(2))-dimethyltransferase OS=Homo sapiens GN=TRMT1 PE=1 SV=1	1	3	5	72.233	659	0	17.15	117210	112810	4398	2.12784	-1.62316	-3.75099	1345
Q9BSJ2	Gamma-tubulin complex component 2	TUBGCP2	sp|Q9BSJ2|GCP2_HUMAN Gamma-tubulin complex component 2 OS=Homo sapiens GN=TUBGCP2 PE=1 SV=2	1	10	13.9	102.53	902	0	77.569	560740	539680	21060	2.12646	0.63505	-1.49141	1223
Q9H2U1;Q6P158	ATP-dependent RNA helicase DHX36	DHX36	sp|Q9H2U1|DHX36_HUMAN ATP-dependent RNA helicase DHX36 OS=Homo sapiens GN=DHX36 PE=1 SV=2	2	16	20.6	114.76	1008	0	95.319	908530	874380	34150	2.12524	1.33121	-0.794028	1270
Q01650	Large neutral amino acids transporter small subunit 1	SLC7A5	sp|Q01650|LAT1_HUMAN Large neutral amino acids transporter small subunit 1 OS=Homo sapiens GN=SLC7A5 PE=1 SV=2	1	1	2.8	55.01	507	0.0015873	7.4997	374060	359930	14135	2.1173	0.050663	-2.06664	736
P05783;CON__H-INV:HIT000015463	Keratin, type I cytoskeletal 18	KRT18	sp|P05783|K1C18_HUMAN Keratin, type I cytoskeletal 18 OS=Homo sapiens GN=KRT18 PE=1 SV=2	2	6	15.3	48.057	430	0	45.816	418420	402570	15848	2.1138	0.212185	-1.90161	277
P35606	Coatomer subunit beta	COPB2	sp|P35606|COPB2_HUMAN Coatomer subunit beta OS=Homo sapiens GN=COPB2 PE=1 SV=2	1	18	25.1	102.49	906	0	159.01	1580600	1519600	60978	2.08619	2.12856	0.0423746	481
Q9BSJ8	Extended synaptotagmin-1	ESYT1	sp|Q9BSJ8|ESYT1_HUMAN Extended synaptotagmin-1 OS=Homo sapiens GN=ESYT1 PE=1 SV=1	1	13	16.5	122.85	1104	0	177.95	1362300	1309500	52776	2.07992	1.91389	-0.166032	1224
Q15393	Splicing factor 3B subunit 3	SF3B3	sp|Q15393|SF3B3_HUMAN Splicing factor 3B subunit 3 OS=Homo sapiens GN=SF3B3 PE=1 SV=4	1	21	20.3	135.58	1217	0	270.97	2815300	2706100	109110	2.07929	2.96109	0.881798	881
Q8TE76	MORC family CW-type zinc finger protein 4	MORC4	sp|Q8TE76|MORC4_HUMAN MORC family CW-type zinc finger protein 4 OS=Homo sapiens GN=MORC4 PE=1 SV=2	1	3	5	106.35	937	0.0010515	16.346	48389	46492	1896.8	2.06227	-2.902	-4.96427	1098
Q86TG7	Retrotransposon-derived protein PEG10	PEG10	sp|Q86TG7|PEG10_HUMAN Retrotransposon-derived protein PEG10 OS=Homo sapiens GN=PEG10 PE=1 SV=2	1	10	20.3	80.172	708	0	69.636	1459200	1401300	57822	2.04594	2.01164	-0.0342951	1014
P28074	Proteasome subunit beta type-5	PSMB5	sp|P28074|PSB5_HUMAN Proteasome subunit beta type-5 OS=Homo sapiens GN=PSMB5 PE=1 SV=3	1	4	18.6	28.48	263	0	25.308	711280	682970	28314	2.03917	0.974768	-1.0644	437
P56589	Peroxisomal biogenesis factor 3	PEX3	sp|P56589|PEX3_HUMAN Peroxisomal biogenesis factor 3 OS=Homo sapiens GN=PEX3 PE=1 SV=1	1	2	5.6	42.139	373	0	18.487	255820	245550	10269	2.02658	-0.501038	-2.52762	626
O75153;Q9Y5I4	Clustered mitochondria protein homolog	CLUH	sp|O75153|CLU_HUMAN Clustered mitochondria protein homolog OS=Homo sapiens GN=CLUH PE=1 SV=2	2	10	8.8	146.67	1309	0	69.762	214860	206200	8658.6	2.0207	-0.75301	-2.77371	166
Q9Y4C2	TRPM8 channel-associated factor 1	TCAF1	sp|Q9Y4C2|TCAF1_HUMAN TRPM8 channel-associated factor 1 OS=Homo sapiens GN=TCAF1 PE=1 SV=3	1	10	11.1	102.12	921	0	89.287	888850	852770	36074	2.01006	1.2951	-0.714954	1461
P55265	Double-stranded RNA-specific adenosine deaminase	ADAR	sp|P55265|DSRAD_HUMAN Double-stranded RNA-specific adenosine deaminase OS=Homo sapiens GN=ADAR PE=1 SV=4	1	3	3.1	136.06	1226	0	17.653	54043	51850	2193.5	2.00997	-2.74464	-4.75461	620
P25786;B4DEV8	Proteasome subunit alpha type-1;Proteasome subunit alpha type	PSMA1	sp|P25786|PSA1_HUMAN Proteasome subunit alpha type-1 OS=Homo sapiens GN=PSMA1 PE=1 SV=1;tr|B4DEV8|B4DEV8_HUMAN Proteasome subunit alpha type OS=Homo sapiens PE=2 SV=1	2	4	17.9	29.555	263	0	24.593	724610	695030	29578	2.00141	1.00002	-1.00139	421
Q9Y3B4	Splicing factor 3B subunit 6	SF3B6	sp|Q9Y3B4|SF3B6_HUMAN Splicing factor 3B subunit 6 OS=Homo sapiens GN=SF3B6 PE=1 SV=1	1	2	18.4	14.585	125	0	24.399	1867900	1791300	76613	1.99421	2.36588	0.371675	1453
P05387	60S acidic ribosomal protein P2	RPLP2	sp|P05387|RLA2_HUMAN 60S acidic ribosomal protein P2 OS=Homo sapiens GN=RPLP2 PE=1 SV=1	1	3	55.7	11.665	115	0	98.142	7762200	7443000	319140	1.99055	4.42076	2.4302	274
Q9UHI6	Probable ATP-dependent RNA helicase DDX20	DDX20	sp|Q9UHI6|DDX20_HUMAN Probable ATP-dependent RNA helicase DDX20 OS=Homo sapiens GN=DDX20 PE=1 SV=2	1	15	23.9	92.239	824	0	204.44	2685500	2574800	110680	1.98693	2.88933	0.902409	1387
O14735	CDP-diacylglycerol--inositol 3-phosphatidyltransferase	CDIPT	sp|O14735|CDIPT_HUMAN CDP-diacylglycerol--inositol 3-phosphatidyltransferase OS=Homo sapiens GN=CDIPT PE=1 SV=1	1	4	22.1	23.539	213	0	57.922	10201000	9776100	424610	1.97198	4.81413	2.84215	89
Q9BQ52	Zinc phosphodiesterase ELAC protein 2	ELAC2	sp|Q9BQ52|RNZ2_HUMAN Zinc phosphodiesterase ELAC protein 2 OS=Homo sapiens GN=ELAC2 PE=1 SV=2	1	4	5.6	92.218	826	0	22.675	82472	79010	3462.4	1.95912	-2.13695	-4.09607	1211
Q15029	116 kDa U5 small nuclear ribonucleoprotein component	EFTUD2	sp|Q15029|U5S1_HUMAN 116 kDa U5 small nuclear ribonucleoprotein component OS=Homo sapiens GN=EFTUD2 PE=1 SV=1	1	25	30.2	109.43	972	0	227.61	3865300	3702600	162690	1.95527	3.41341	1.45814	861
O43379	WD repeat-containing protein 62	WDR62	sp|O43379|WDR62_HUMAN WD repeat-containing protein 62 OS=Homo sapiens GN=WDR62 PE=1 SV=4	1	2	1.8	165.95	1518	0.00087108	11.135	23224	22247	977.94	1.95465	-3.96537	-5.92002	125
Q96EY1	DnaJ homolog subfamily A member 3, mitochondrial	DNAJA3	sp|Q96EY1|DNJA3_HUMAN DnaJ homolog subfamily A member 3, mitochondrial OS=Homo sapiens GN=DNAJA3 PE=1 SV=2	1	16	33.1	52.488	480	0	323.31	13543000	12972000	570650	1.95358	5.2222	3.26862	1158
P21399	Cytoplasmic aconitate hydratase	ACO1	sp|P21399|ACOC_HUMAN Cytoplasmic aconitate hydratase OS=Homo sapiens GN=ACO1 PE=1 SV=3	1	3	3.4	98.398	889	0.0010582	16.5	100200	95971	4226.9	1.95186	-1.85638	-3.80824	391
Q9UKF6	Cleavage and polyadenylation specificity factor subunit 3	CPSF3	sp|Q9UKF6|CPSF3_HUMAN Cleavage and polyadenylation specificity factor subunit 3 OS=Homo sapiens GN=CPSF3 PE=1 SV=1	1	4	6.6	77.485	684	0	25.605	208340	199520	8817.1	1.94702	-0.80052	-2.74754	1405
P49721	Proteasome subunit beta type-2	PSMB2	sp|P49721|PSB2_HUMAN Proteasome subunit beta type-2 OS=Homo sapiens GN=PSMB2 PE=1 SV=1	1	5	30.3	22.836	201	0	56.881	4926600	4717800	208840	1.94458	3.76299	1.81841	563
P35249	Replication factor C subunit 4	RFC4	sp|P35249|RFC4_HUMAN Replication factor C subunit 4 OS=Homo sapiens GN=RFC4 PE=1 SV=2	1	4	11.8	39.681	363	0	24.152	404420	387210	17213	1.93848	0.156063	-1.78242	476
Q96SN8	CDK5 regulatory subunit-associated protein 2	CDK5RAP2	sp|Q96SN8|CK5P2_HUMAN CDK5 regulatory subunit-associated protein 2 OS=Homo sapiens GN=CDK5RAP2 PE=1 SV=5	1	21	14.6	215.04	1893	0	141.48	567720	543540	24177	1.93761	0.645332	-1.29228	1181
Q6P2Q9	Pre-mRNA-processing-splicing factor 8	PRPF8	sp|Q6P2Q9|PRP8_HUMAN Pre-mRNA-processing-splicing factor 8 OS=Homo sapiens GN=PRPF8 PE=1 SV=2	1	37	19.8	273.6	2335	0	258.96	1077000	1030900	46101	1.92989	1.56878	-0.361115	966
Q9NTJ3	Structural maintenance of chromosomes protein 4	SMC4	sp|Q9NTJ3|SMC4_HUMAN Structural maintenance of chromosomes protein 4 OS=Homo sapiens GN=SMC4 PE=1 SV=2	1	30	27.3	147.18	1288	0	314.62	2170500	2076700	93832	1.915	2.57917	0.664165	1326
Q9NXW2	DnaJ homolog subfamily B member 12	DNAJB12	sp|Q9NXW2|DJB12_HUMAN DnaJ homolog subfamily B member 12 OS=Homo sapiens GN=DNAJB12 PE=1 SV=4	1	5	16.5	41.818	375	0	46.138	460380	440320	20067	1.90259	0.341499	-1.56109	1347
O14818;Q8TAA3	Proteasome subunit alpha type-7	PSMA7	sp|O14818|PSA7_HUMAN Proteasome subunit alpha type-7 OS=Homo sapiens GN=PSMA7 PE=1 SV=1	2	8	38.7	27.887	248	0	59.622	2967200	2836900	130250	1.89189	3.02919	1.1373	95
P26358	DNA (cytosine-5)-methyltransferase 1	DNMT1	sp|P26358|DNMT1_HUMAN DNA (cytosine-5)-methyltransferase 1 OS=Homo sapiens GN=DNMT1 PE=1 SV=2	1	10	7.2	183.16	1616	0	58.84	261660	250100	11553	1.8831	-0.474548	-2.35765	426
A6NHR9	Structural maintenance of chromosomes flexible hinge domain-containing protein 1	SMCHD1	sp|A6NHR9|SMHD1_HUMAN Structural maintenance of chromosomes flexible hinge domain-containing protein 1 OS=Homo sapiens GN=SMCHD1 PE=1 SV=2	1	7	4	226.37	2005	0	40.623	73046	69795	3250.2	1.87145	-2.31586	-4.18731	16
Q15773	Myeloid leukemia factor 2	MLF2	sp|Q15773|MLF2_HUMAN Myeloid leukemia factor 2 OS=Homo sapiens GN=MLF2 PE=1 SV=1	1	3	24.6	28.147	248	0	47.029	4871900	4654600	217270	1.86803	3.74353	1.8755	895
Q99741	Cell division control protein 6 homolog	CDC6	sp|Q99741|CDC6_HUMAN Cell division control protein 6 homolog OS=Homo sapiens GN=CDC6 PE=1 SV=1	1	4	6.1	62.72	560	0	22.326	209100	199750	9352.7	1.8636	-0.798859	-2.66246	1202
Q16513	Serine/threonine-protein kinase N2	PKN2	sp|Q16513|PKN2_HUMAN Serine/threonine-protein kinase N2 OS=Homo sapiens GN=PKN2 PE=1 SV=1	1	3	5.4	112.03	984	0	17.364	173400	165620	7783.2	1.8583	-1.06918	-2.92748	897
Q6PL18;Q9ULI0	ATPase family AAA domain-containing protein 2;ATPase family AAA domain-containing protein 2B	ATAD2;ATAD2B	sp|Q6PL18|ATAD2_HUMAN ATPase family AAA domain-containing protein 2 OS=Homo sapiens GN=ATAD2 PE=1 SV=1;sp|Q9ULI0|ATD2B_HUMAN ATPase family AAA domain-containing protein 2B OS=Homo sapiens GN=ATAD2B PE=1 SV=3	2	2	1.7	158.55	1390	0.00094607	11.877	29745	28407	1337.9	1.85514	-3.61274	-5.46787	978
Q92888	Rho guanine nucleotide exchange factor 1	ARHGEF1	sp|Q92888|ARHG1_HUMAN Rho guanine nucleotide exchange factor 1 OS=Homo sapiens GN=ARHGEF1 PE=1 SV=2	1	1	1.4	102.43	912	0.0022255	6.4159	31441	30020	1420.8	1.84808	-3.53306	-5.38114	1131
Q01780	Exosome component 10	EXOSC10	sp|Q01780|EXOSX_HUMAN Exosome component 10 OS=Homo sapiens GN=EXOSC10 PE=1 SV=2	1	5	6.9	100.83	885	0	28.729	147790	141080	6705.8	1.84189	-1.30054	-3.14243	737
P42285	Superkiller viralicidic activity 2-like 2	SKIV2L2	sp|P42285|SK2L2_HUMAN Superkiller viralicidic activity 2-like 2 OS=Homo sapiens GN=SKIV2L2 PE=1 SV=3	1	6	6.3	117.8	1042	0	36.646	185350	176770	8573.7	1.81274	-0.97518	-2.78792	512
O75746	Calcium-binding mitochondrial carrier protein Aralar1	SLC25A12	sp|O75746|CMC1_HUMAN Calcium-binding mitochondrial carrier protein Aralar1 OS=Homo sapiens GN=SLC25A12 PE=1 SV=2	1	14	24.2	74.761	678	0	63.27	843260	804240	39020	1.81227	1.21057	-0.6017	191
Q6P1K8;Q13888	General transcription factor IIH subunit 2-like protein;General transcription factor IIH subunit 2	GTF2H2C;GTF2H2	sp|Q6P1K8|T2H2L_HUMAN General transcription factor IIH subunit 2-like protein OS=Homo sapiens GN=GTF2H2C PE=1 SV=1;sp|Q13888|TF2H2_HUMAN General transcription factor IIH subunit 2 OS=Homo sapiens GN=GTF2H2 PE=1 SV=1	2	3	8.6	44.452	395	0	17.362	375490	357990	17508	1.80077	0.0428658	-1.7579	820
P48643	T-complex protein 1 subunit epsilon	CCT5	sp|P48643|TCPE_HUMAN T-complex protein 1 subunit epsilon OS=Homo sapiens GN=CCT5 PE=1 SV=1	1	13	30.1	59.67	541	0	94.484	1956100	1864700	91376	1.79792	2.42382	0.625902	551
Q9H9Y6	DNA-directed RNA polymerase I subunit RPA2	POLR1B	sp|Q9H9Y6|RPA2_HUMAN DNA-directed RNA polymerase I subunit RPA2 OS=Homo sapiens GN=POLR1B PE=1 SV=2	1	10	9.8	128.23	1135	0	66.585	423340	403380	19958	1.78403	0.215086	-1.56895	1292
Q6P3X3	Tetratricopeptide repeat protein 27	TTC27	sp|Q6P3X3|TTC27_HUMAN Tetratricopeptide repeat protein 27 OS=Homo sapiens GN=TTC27 PE=1 SV=1	1	2	3.2	96.631	843	0.0009058	11.523	48856	46516	2340.3	1.75989	-2.90125	-4.66115	967
Q8IWX8	Calcium homeostasis endoplasmic reticulum protein	CHERP	sp|Q8IWX8|CHERP_HUMAN Calcium homeostasis endoplasmic reticulum protein OS=Homo sapiens GN=CHERP PE=1 SV=3	1	3	2.8	103.7	916	0	16.627	113050	107590	5455.1	1.74873	-1.69151	-3.44024	1036
Q9BUQ8	Probable ATP-dependent RNA helicase DDX23	DDX23	sp|Q9BUQ8|DDX23_HUMAN Probable ATP-dependent RNA helicase DDX23 OS=Homo sapiens GN=DDX23 PE=1 SV=3	1	3	4.1	95.581	820	0.0010526	16.429	69630	66232	3397.5	1.73192	-2.39145	-4.12337	1233
P33991	DNA replication licensing factor MCM4	MCM4	sp|P33991|MCM4_HUMAN DNA replication licensing factor MCM4 OS=Homo sapiens GN=MCM4 PE=1 SV=5	1	2	2.5	96.557	863	0	19.889	74805	71149	3656.7	1.72916	-2.28814	-4.0173	467
P50991	T-complex protein 1 subunit delta	CCT4	sp|P50991|TCPD_HUMAN T-complex protein 1 subunit delta OS=Homo sapiens GN=CCT4 PE=1 SV=4	1	17	36	57.924	539	0	196.81	3564500	3388700	175860	1.71516	3.28561	1.57044	576
Q9HCE1	Putative helicase MOV-10	MOV10	sp|Q9HCE1|MOV10_HUMAN Putative helicase MOV-10 OS=Homo sapiens GN=MOV10 PE=1 SV=2	1	9	10.6	113.67	1003	0	55.985	344010	326920	17097	1.70405	-0.0881157	-1.79217	1298
P60891;P11908	Ribose-phosphate pyrophosphokinase 1;Ribose-phosphate pyrophosphokinase 2	PRPS1;PRPS2	sp|P60891|PRPS1_HUMAN Ribose-phosphate pyrophosphokinase 1 OS=Homo sapiens GN=PRPS1 PE=1 SV=2;sp|P11908|PRPS2_HUMAN Ribose-phosphate pyrophosphokinase 2 OS=Homo sapiens GN=PRPS2 PE=1 SV=2	2	2	8.8	34.834	318	0	28.29	281160	267180	13987	1.70259	-0.379242	-2.08183	640
Q13439	Golgin subfamily A member 4	GOLGA4	sp|Q13439|GOGA4_HUMAN Golgin subfamily A member 4 OS=Homo sapiens GN=GOLGA4 PE=1 SV=1	1	17	9.1	261.14	2230	0	101.08	151360	143780	7587.9	1.69095	-1.27319	-2.96414	804
Q9H307	Pinin	PNN	sp|Q9H307|PININ_HUMAN Pinin OS=Homo sapiens GN=PNN PE=1 SV=4	1	2	3.9	81.613	717	0.00094073	11.842	72865	69211	3654.1	1.69035	-2.32798	-4.01833	1273
Q6NSI4	Uncharacterized protein CXorf57	CXorf57	sp|Q6NSI4|CX057_HUMAN Uncharacterized protein CXorf57 OS=Homo sapiens GN=CXorf57 PE=1 SV=2	1	6	9.1	97.553	855	0	37.568	329780	313140	16633	1.68162	-0.150246	-1.83187	960
P04843	Dolichyl-diphosphooligosaccharide--protein glycosyltransferase subunit 1	RPN1	sp|P04843|RPN1_HUMAN Dolichyl-diphosphooligosaccharide--protein glycosyltransferase subunit 1 OS=Homo sapiens GN=RPN1 PE=1 SV=1	1	5	9.4	68.569	607	0	31.147	279860	265710	14149	1.67801	-0.387201	-2.06521	264
O15027	Protein transport protein Sec16A	SEC16A	sp|O15027|SC16A_HUMAN Protein transport protein Sec16A OS=Homo sapiens GN=SEC16A PE=1 SV=3	1	14	9.7	233.51	2179	0	93.144	495130	470010	25124	1.67249	0.435638	-1.23685	105
Q7L2E3	Putative ATP-dependent RNA helicase DHX30	DHX30	sp|Q7L2E3|DHX30_HUMAN Putative ATP-dependent RNA helicase DHX30 OS=Homo sapiens GN=DHX30 PE=1 SV=1	1	10	9.2	133.94	1194	0	59.079	219910	208710	11200	1.66686	-0.735554	-2.40242	991
P11171	Protein 4.1	EPB41	sp|P11171|41_HUMAN Protein 4.1 OS=Homo sapiens GN=EPB41 PE=1 SV=4	1	4	6.2	97.016	864	0	24.232	101620	96401	5223.1	1.653	-1.84993	-3.50294	322
Q7Z4H7	HAUS augmin-like complex subunit 6	HAUS6	sp|Q7Z4H7|HAUS6_HUMAN HAUS augmin-like complex subunit 6 OS=Homo sapiens GN=HAUS6 PE=1 SV=2	1	11	14	108.62	955	0	98.674	606780	575540	31235	1.65061	0.727861	-0.92275	1006
Q99613;B5ME19	Eukaryotic translation initiation factor 3 subunit C;Eukaryotic translation initiation factor 3 subunit C-like protein	EIF3C;EIF3CL	sp|Q99613|EIF3C_HUMAN Eukaryotic translation initiation factor 3 subunit C OS=Homo sapiens GN=EIF3C PE=1 SV=1;sp|B5ME19|EIFCL_HUMAN Eukaryotic translation initiation factor 3 subunit C-like protein OS=Homo sapiens GN=EIF3CL PE=3 SV=1	2	13	16.1	105.34	913	0	114.07	998050	946650	51396	1.65004	1.44578	-0.204258	1191
O95163	Elongator complex protein 1	IKBKAP	sp|O95163|ELP1_HUMAN Elongator complex protein 1 OS=Homo sapiens GN=IKBKAP PE=1 SV=3	1	13	13.7	150.25	1332	0	103.5	978820	927570	51256	1.6246	1.4164	-0.208193	211
P31944	Caspase-14;Caspase-14 subunit p17, mature form;Caspase-14 subunit p10, mature form;Caspase-14 subunit p20, intermediate form;Caspase-14 subunit p8, intermediate form	CASP14	sp|P31944|CASPE_HUMAN Caspase-14 OS=Homo sapiens GN=CASP14 PE=1 SV=2	1	7	28.9	27.679	242	0	66.835	2512600	2379600	132960	1.60859	2.77559	1.16701	459
Q6PKG0;Q659C4	La-related protein 1	LARP1	sp|Q6PKG0|LARP1_HUMAN La-related protein 1 OS=Homo sapiens GN=LARP1 PE=1 SV=2	2	7	8.9	123.51	1096	0	51.027	303610	287540	16072	1.60807	-0.273291	-1.88136	977
Q6P996;Q6P474	Pyridoxal-dependent decarboxylase domain-containing protein 1	PDXDC1	sp|Q6P996|PDXD1_HUMAN Pyridoxal-dependent decarboxylase domain-containing protein 1 OS=Homo sapiens GN=PDXDC1 PE=1 SV=2	2	4	6.5	86.706	788	0	22.415	398590	377450	21136	1.60544	0.119232	-1.48621	971
P53396	ATP-citrate synthase	ACLY	sp|P53396|ACLY_HUMAN ATP-citrate synthase OS=Homo sapiens GN=ACLY PE=1 SV=3	1	22	22.8	120.84	1101	0	167.52	1807100	1710900	96268	1.59849	2.29963	0.701143	601
Q14683	Structural maintenance of chromosomes protein 1A	SMC1A	sp|Q14683|SMC1A_HUMAN Structural maintenance of chromosomes protein 1A OS=Homo sapiens GN=SMC1A PE=1 SV=2	1	53	42.3	143.23	1233	0	323.31	9598300	9085500	512770	1.59411	4.70844	3.11433	850
P05141;Q9H0C2	ADP/ATP translocase 2;ADP/ATP translocase 2, N-terminally processed	SLC25A5	sp|P05141|ADT2_HUMAN ADP/ATP translocase 2 OS=Homo sapiens GN=SLC25A5 PE=1 SV=7	2	17	44	32.852	298	0	114.82	57665000	54533000	3131200	1.56927	7.29393	5.72466	271
Q99666;O14715	RANBP2-like and GRIP domain-containing protein 5/6;RANBP2-like and GRIP domain-containing protein 8	RGPD5;RGPD8	sp|Q99666|RGPD5_HUMAN RANBP2-like and GRIP domain-containing protein 5/6 OS=Homo sapiens GN=RGPD5 PE=1 SV=3;sp|O14715|RGPD8_HUMAN RANBP2-like and GRIP domain-containing protein 8 OS=Homo sapiens GN=RGPD8 PE=1 SV=2	2	14	9.2	198.92	1765	0	42.303	114500	108270	6228.4	1.56656	-1.68242	-3.24898	1197
Q16576	Histone-binding protein RBBP7	RBBP7	sp|Q16576|RBBP7_HUMAN Histone-binding protein RBBP7 OS=Homo sapiens GN=RBBP7 PE=1 SV=1	1	7	21.9	47.82	425	0	64.279	4080500	3858500	222060	1.56595	3.47291	1.90696	900
Q99832	T-complex protein 1 subunit eta	CCT7	sp|Q99832|TCPH_HUMAN T-complex protein 1 subunit eta OS=Homo sapiens GN=CCT7 PE=1 SV=2	1	15	35.5	59.366	543	0	140.55	3151400	2979600	171760	1.56359	3.09999	1.53641	1204
P35658	Nuclear pore complex protein Nup214	NUP214	sp|P35658|NU214_HUMAN Nuclear pore complex protein Nup214 OS=Homo sapiens GN=NUP214 PE=1 SV=2	1	16	11.5	213.62	2090	0	109.46	800570	756810	43760	1.55918	1.12288	-0.436301	485
Q14203;E7EWF7	Dynactin subunit 1	DCTN1	sp|Q14203|DCTN1_HUMAN Dynactin subunit 1 OS=Homo sapiens GN=DCTN1 PE=1 SV=3	2	18	17.4	141.69	1278	0	130.07	999040	944370	54665	1.5576	1.4423	-0.115296	831
Q9Y5X1	Sorting nexin-9	SNX9	sp|Q9Y5X1|SNX9_HUMAN Sorting nexin-9 OS=Homo sapiens GN=SNX9 PE=1 SV=1	1	5	10.4	66.591	595	0	35.226	354310	334900	19403	1.55631	-0.0533237	-1.60963	1480
P31946	14-3-3 protein beta/alpha;14-3-3 protein beta/alpha, N-terminally processed	YWHAB	sp|P31946|1433B_HUMAN 14-3-3 protein beta/alpha OS=Homo sapiens GN=YWHAB PE=1 SV=3	1	5	25.2	28.082	246	0	30.845	690690	652710	37981	1.55002	0.909388	-0.640636	460
Q96CX2;Q6ZWB6	BTB/POZ domain-containing protein KCTD12	KCTD12	sp|Q96CX2|KCD12_HUMAN BTB/POZ domain-containing protein KCTD12 OS=Homo sapiens GN=KCTD12 PE=1 SV=1	2	6	25.8	35.7	325	0	46.207	910400	860140	50260	1.54402	1.30752	-0.236504	1153
P48200	Iron-responsive element-binding protein 2	IREB2	sp|P48200|IREB2_HUMAN Iron-responsive element-binding protein 2 OS=Homo sapiens GN=IREB2 PE=1 SV=3	1	4	4.2	105.04	963	0	22.348	202060	190890	11170	1.54197	-0.864313	-2.40628	547
P47736	Rap1 GTPase-activating protein 1	RAP1GAP	sp|P47736|RPGP1_HUMAN Rap1 GTPase-activating protein 1 OS=Homo sapiens GN=RAP1GAP PE=1 SV=2	1	1	2.1	73.361	663	0.0077193	6.0279	636880	601670	35209	1.54189	0.791918	-0.749969	541
P18124	60S ribosomal protein L7	RPL7	sp|P18124|RL7_HUMAN 60S ribosomal protein L7 OS=Homo sapiens GN=RPL7 PE=1 SV=1	1	2	12.1	29.225	248	0	52.152	1576900	1489200	87712	1.53255	2.09941	0.56686	374
P00374;Q86XF0	Dihydrofolate reductase;Dihydrofolate reductase, mitochondrial	DHFR;DHFRL1	sp|P00374|DYR_HUMAN Dihydrofolate reductase OS=Homo sapiens GN=DHFR PE=1 SV=2;sp|Q86XF0|DYRL1_HUMAN Dihydrofolate reductase, mitochondrial OS=Homo sapiens GN=DHFRL1 PE=1 SV=1	2	4	21.4	21.452	187	0	37.813	2509100	2369500	139640	1.53173	2.76946	1.23773	240
P25685	DnaJ homolog subfamily B member 1	DNAJB1	sp|P25685|DNJB1_HUMAN DnaJ homolog subfamily B member 1 OS=Homo sapiens GN=DNAJB1 PE=1 SV=4	1	13	29.4	38.044	340	0	142.23	7634400	7208400	426050	1.52752	4.37455	2.84704	418
O43795;Q9UBC5	Unconventional myosin-Ib	MYO1B	sp|O43795|MYO1B_HUMAN Unconventional myosin-Ib OS=Homo sapiens GN=MYO1B PE=1 SV=3	2	4	4	131.98	1136	0	23.508	149490	141110	8375.4	1.52145	-1.30023	-2.82168	137
Q9Y2X9	Zinc finger protein 281	ZNF281	sp|Q9Y2X9|ZN281_HUMAN Zinc finger protein 281 OS=Homo sapiens GN=ZNF281 PE=1 SV=1	1	3	4.7	96.914	895	0	20.46	111140	104880	6253.7	1.51482	-1.72831	-3.24313	1450
Q9NX31	Oxidative stress-responsive serine-rich protein 1	OSER1	sp|Q9NX31|OSER1_HUMAN Oxidative stress-responsive serine-rich protein 1 OS=Homo sapiens GN=OSER1 PE=2 SV=2	1	4	20.9	31.779	292	0	26.685	323440	305200	18237	1.51175	-0.1873	-1.69905	1342
Q8TC07	TBC1 domain family member 15	TBC1D15	sp|Q8TC07|TBC15_HUMAN TBC1 domain family member 15 OS=Homo sapiens GN=TBC1D15 PE=1 SV=2	1	12	21.3	79.49	691	0	77.675	1174200	1106800	67448	1.48341	1.67127	0.187862	1088
Q9BZH6	WD repeat-containing protein 11	WDR11	sp|Q9BZH6|WDR11_HUMAN WD repeat-containing protein 11 OS=Homo sapiens GN=WDR11 PE=1 SV=1	1	4	4.4	136.68	1224	0	26.159	108300	102070	6226.7	1.48188	-1.76749	-3.24937	1248
Q5JVF3	PCI domain-containing protein 2	PCID2	sp|Q5JVF3|PCID2_HUMAN PCI domain-containing protein 2 OS=Homo sapiens GN=PCID2 PE=1 SV=2	1	3	9.5	46.029	399	0	22.605	214310	201990	12324	1.48167	-0.78277	-2.26444	928
Q14204	Cytoplasmic dynein 1 heavy chain 1	DYNC1H1	sp|Q14204|DYHC1_HUMAN Cytoplasmic dynein 1 heavy chain 1 OS=Homo sapiens GN=DYNC1H1 PE=1 SV=5	1	80	19.8	532.4	4646	0	323.31	1365500	1287000	78580	1.48064	1.88889	0.408249	832
Q9P035	Very-long-chain (3R)-3-hydroxyacyl-CoA dehydratase 3	HACD3	sp|Q9P035|HACD3_HUMAN Very-long-chain (3R)-3-hydroxyacyl-CoA dehydratase 3 OS=Homo sapiens GN=HACD3 PE=1 SV=2	1	6	18	43.159	362	0	58.854	1900800	1791200	109650	1.47688	2.3658	0.88892	1358
Q8ND04;J3QRE1	Protein SMG8	SMG8	sp|Q8ND04|SMG8_HUMAN Protein SMG8 OS=Homo sapiens GN=SMG8 PE=1 SV=1	2	4	6.1	109.68	991	0	22.683	112730	106210	6516.9	1.47352	-1.71013	-3.18366	1070
P10398	Serine/threonine-protein kinase A-Raf	ARAF	sp|P10398|ARAF_HUMAN Serine/threonine-protein kinase A-Raf OS=Homo sapiens GN=ARAF PE=1 SV=2	1	3	5.4	67.585	606	0	17.542	153390	144470	8923	1.46403	-1.26628	-2.73031	316
Q9Y5B9	FACT complex subunit SPT16	SUPT16H	sp|Q9Y5B9|SP16H_HUMAN FACT complex subunit SPT16 OS=Homo sapiens GN=SUPT16H PE=1 SV=1	1	8	8.8	119.91	1047	0	51.116	137720	129680	8037.8	1.45894	-1.4221	-2.88104	1474
Q6P4A7	Sideroflexin-4	SFXN4	sp|Q6P4A7|SFXN4_HUMAN Sideroflexin-4 OS=Homo sapiens GN=SFXN4 PE=1 SV=1	1	5	21.1	37.998	337	0	39.535	1269200	1194800	74359	1.45305	1.78164	0.328594	969
P46060	Ran GTPase-activating protein 1	RANGAP1	sp|P46060|RAGP1_HUMAN Ran GTPase-activating protein 1 OS=Homo sapiens GN=RANGAP1 PE=1 SV=1	1	11	21.6	63.541	587	0	92.745	2222100	2091900	130250	1.45239	2.58969	1.1373	528
P25686	DnaJ homolog subfamily B member 2	DNAJB2	sp|P25686|DNJB2_HUMAN DnaJ homolog subfamily B member 2 OS=Homo sapiens GN=DNAJB2 PE=1 SV=3	1	2	6.8	35.58	324	0.00088968	11.364	132520	124710	7808.6	1.4443	-1.47848	-2.92278	419
O95816	BAG family molecular chaperone regulator 2	BAG2	sp|O95816|BAG2_HUMAN BAG family molecular chaperone regulator 2 OS=Homo sapiens GN=BAG2 PE=1 SV=1	1	15	68.7	23.772	211	0	323.31	81680000	76843000	4836700	1.43675	7.78872	6.35196	231
P19105;O14950;P24844	Myosin regulatory light chain 12A;Myosin regulatory light chain 12B	MYL12A;MYL12B	sp|P19105|ML12A_HUMAN Myosin regulatory light chain 12A OS=Homo sapiens GN=MYL12A PE=1 SV=2;sp|O14950|ML12B_HUMAN Myosin regulatory light chain 12B OS=Homo sapiens GN=MYL12B PE=1 SV=2	3	5	23.4	19.794	171	0	35.963	2071400	1948600	122820	1.43475	2.48731	1.05256	100
O60313	Dynamin-like 120 kDa protein, mitochondrial;Dynamin-like 120 kDa protein, form S1	OPA1	sp|O60313|OPA1_HUMAN Dynamin-like 120 kDa protein, mitochondrial OS=Homo sapiens GN=OPA1 PE=1 SV=3	1	7	8.6	111.63	960	0	42.149	210680	198170	12509	1.43263	-0.810316	-2.24295	149
Q86Y56	Dynein assembly factor 5, axonemal	DNAAF5	sp|Q86Y56|DAAF5_HUMAN Dynein assembly factor 5, axonemal OS=Homo sapiens GN=DNAAF5 PE=1 SV=4	1	3	4.3	93.52	855	0	16.663	79492	74746	4746.8	1.4239	-2.21699	-3.64089	1025
Q8IZH2	5-3 exoribonuclease 1	XRN1	sp|Q8IZH2|XRN1_HUMAN 5-3 exoribonuclease 1 OS=Homo sapiens GN=XRN1 PE=1 SV=1	1	7	5	194.1	1706	0	40.981	165310	155440	9872.9	1.42367	-1.1607	-2.58437	1048
Q13409	Cytoplasmic dynein 1 intermediate chain 2	DYNC1I2	sp|Q13409|DC1I2_HUMAN Cytoplasmic dynein 1 intermediate chain 2 OS=Homo sapiens GN=DYNC1I2 PE=1 SV=3	1	3	7.7	71.456	638	0	18.399	303870	285710	18161	1.42257	-0.282503	-1.70507	801
P49327	Fatty acid synthase;[Acyl-carrier-protein] S-acetyltransferase;[Acyl-carrier-protein] S-malonyltransferase;3-oxoacyl-[acyl-carrier-protein] synthase;3-oxoacyl-[acyl-carrier-protein] reductase;3-hydroxyacyl-[acyl-carrier-protein] dehydratase;Enoyl-[acyl-carrier-protein] reductase;Oleoyl-[acyl-carrier-protein] hydrolase	FASN	sp|P49327|FAS_HUMAN Fatty acid synthase OS=Homo sapiens GN=FASN PE=1 SV=3	1	76	42	273.42	2511	0	323.31	6948100	6532900	415280	1.4225	4.2326	2.8101	555
P48444	Coatomer subunit delta	ARCN1	sp|P48444|COPD_HUMAN Coatomer subunit delta OS=Homo sapiens GN=ARCN1 PE=1 SV=1	1	11	25.4	57.21	511	0	86.141	2374800	2231700	143100	1.40998	2.68302	1.27304	548
Q9C0C9	E2/E3 hybrid ubiquitin-protein ligase UBE2O	UBE2O	sp|Q9C0C9|UBE2O_HUMAN (E3-independent) E2 ubiquitin-conjugating enzyme OS=Homo sapiens GN=UBE2O PE=1 SV=3	1	4	3.4	141.29	1292	0	22.62	91990	86387	5602.5	1.3936	-2.00817	-3.40177	1256
Q99536	Synaptic vesicle membrane protein VAT-1 homolog	VAT1	sp|Q99536|VAT1_HUMAN Synaptic vesicle membrane protein VAT-1 homolog OS=Homo sapiens GN=VAT1 PE=1 SV=2	1	3	11.5	41.92	393	0	18.156	217490	204210	13281	1.38955	-0.767	-2.15655	1188
P23921	Ribonucleoside-diphosphate reductase large subunit	RRM1	sp|P23921|RIR1_HUMAN Ribonucleoside-diphosphate reductase large subunit OS=Homo sapiens GN=RRM1 PE=1 SV=1	1	6	9.2	90.069	792	0	40.839	396420	372200	24224	1.3885	0.0990238	-1.28948	410
Q14671;Q8TB72	Pumilio homolog 1	PUM1	sp|Q14671|PUM1_HUMAN Pumilio homolog 1 OS=Homo sapiens GN=PUM1 PE=1 SV=3	2	4	4.6	126.47	1186	0	27.224	130020	122060	7953.8	1.38673	-1.50946	-2.8962	845
Q9Y5B0	RNA polymerase II subunit A C-terminal domain phosphatase	CTDP1	sp|Q9Y5B0|CTDP1_HUMAN RNA polymerase II subunit A C-terminal domain phosphatase OS=Homo sapiens GN=CTDP1 PE=1 SV=3	1	3	3.9	104.4	961	0	16.805	107260	100690	6573.2	1.38411	-1.78713	-3.17125	1473
P53814	Smoothelin	SMTN	sp|P53814|SMTN_HUMAN Smoothelin OS=Homo sapiens GN=SMTN PE=1 SV=7	1	3	4.3	99.058	917	0	16.908	99990	93834	6156.2	1.37693	-1.88887	-3.2658	604
Q9ULT8	E3 ubiquitin-protein ligase HECTD1	HECTD1	sp|Q9ULT8|HECD1_HUMAN E3 ubiquitin-protein ligase HECTD1 OS=Homo sapiens GN=HECTD1 PE=1 SV=3	1	27	13.6	289.38	2610	0	205.12	885540	831010	54538	1.37646	1.25781	-0.118652	1411
Q9UNF1;Q12816	Melanoma-associated antigen D2	MAGED2	sp|Q9UNF1|MAGD2_HUMAN Melanoma-associated antigen D2 OS=Homo sapiens GN=MAGED2 PE=1 SV=2	2	14	30	64.953	606	0	140.64	3669300	3441800	227490	1.36622	3.30804	1.94182	1421
P42356	Phosphatidylinositol 4-kinase alpha	PI4KA	sp|P42356|PI4KA_HUMAN Phosphatidylinositol 4-kinase alpha OS=Homo sapiens GN=PI4KA PE=1 SV=4	1	3	1.9	236.83	2102	0	16.982	36776	34487	2289	1.3602	-3.33293	-4.69312	514
Q9Y5A9;Q9BYJ9;Q7Z739	YTH domain-containing family protein 2	YTHDF2	sp|Q9Y5A9|YTHD2_HUMAN YTH domain-containing family protein 2 OS=Homo sapiens GN=YTHDF2 PE=1 SV=2	3	8	17.1	62.333	579	0	246.97	3749100	3515600	233520	1.35909	3.33865	1.97956	1472
P35221	Catenin alpha-1	CTNNA1	sp|P35221|CTNA1_HUMAN Catenin alpha-1 OS=Homo sapiens GN=CTNNA1 PE=1 SV=1	1	2	2.5	100.07	906	0.0010267	13.835	71844	67361	4483.1	1.35628	-2.36707	-3.72334	474
P53618	Coatomer subunit beta	COPB1	sp|P53618|COPB_HUMAN Coatomer subunit beta OS=Homo sapiens GN=COPB1 PE=1 SV=3	1	18	25	107.14	953	0	271.9	2954600	2769600	185080	1.35039	2.99455	1.64416	602
Q9BQE5	Apolipoprotein L2	APOL2	sp|Q9BQE5|APOL2_HUMAN Apolipoprotein L2 OS=Homo sapiens GN=APOL2 PE=1 SV=1	1	2	6.5	37.092	337	0.0016849	10.847	136030	127460	8572.4	1.34113	-1.44701	-2.78814	1214
Q14186	Transcription factor Dp-1	TFDP1	sp|Q14186|TFDP1_HUMAN Transcription factor Dp-1 OS=Homo sapiens GN=TFDP1 PE=1 SV=1	1	2	7.1	45.07	410	0.00087032	11.121	436380	408830	27555	1.33805	0.234447	-1.1036	829
P25705	ATP synthase subunit alpha, mitochondrial	ATP5A1	sp|P25705|ATPA_HUMAN ATP synthase subunit alpha, mitochondrial OS=Homo sapiens GN=ATP5A1 PE=1 SV=1	1	19	44.5	59.75	553	0	323.31	7317900	6855500	462450	1.33682	4.30214	2.96531	420
Q13148	TAR DNA-binding protein 43	TARDBP	sp|Q13148|TADBP_HUMAN TAR DNA-binding protein 43 OS=Homo sapiens GN=TARDBP PE=1 SV=1	1	4	12.3	44.739	414	0	65.378	1212200	1135500	76648	1.33587	1.7082	0.372334	790
P52434	DNA-directed RNA polymerases I, II, and III subunit RPABC3	POLR2H	sp|P52434|RPAB3_HUMAN DNA-directed RNA polymerases I, II, and III subunit RPABC3 OS=Homo sapiens GN=POLR2H PE=1 SV=4	1	4	30	17.143	150	0	34.205	2153100	2016200	136950	1.32685	2.53651	1.20966	592
Q9P0K7	Ankycorbin	RAI14	sp|Q9P0K7|RAI14_HUMAN Ankycorbin OS=Homo sapiens GN=RAI14 PE=1 SV=2	1	3	3.2	110.04	980	0	16.975	97887	91632	6254.8	1.31975	-1.92313	-3.24288	1359
Q8WUA4	General transcription factor 3C polypeptide 2	GTF3C2	sp|Q8WUA4|TF3C2_HUMAN General transcription factor 3C polypeptide 2 OS=Homo sapiens GN=GTF3C2 PE=1 SV=2	1	2	2.2	100.68	911	0.00085251	10.982	128710	120440	8263.9	1.31228	-1.52874	-2.84102	1105
Q9H936;Q9H1K4	Mitochondrial glutamate carrier 1;Mitochondrial glutamate carrier 2	SLC25A22;SLC25A18	sp|Q9H936|GHC1_HUMAN Mitochondrial glutamate carrier 1 OS=Homo sapiens GN=SLC25A22 PE=1 SV=1;sp|Q9H1K4|GHC2_HUMAN Mitochondrial glutamate carrier 2 OS=Homo sapiens GN=SLC25A18 PE=1 SV=1	2	8	35.3	34.47	323	0	77.425	4248500	3975500	273020	1.31099	3.51601	2.20502	1288
P53007	Tricarboxylate transport protein, mitochondrial	SLC25A1	sp|P53007|TXTP_HUMAN Tricarboxylate transport protein, mitochondrial OS=Homo sapiens GN=SLC25A1 PE=1 SV=2	1	7	23.2	34.012	311	0	96.129	6499500	6079600	419900	1.30279	4.12885	2.82606	599
Q9NVI7	ATPase family AAA domain-containing protein 3A	ATAD3A	sp|Q9NVI7|ATD3A_HUMAN ATPase family AAA domain-containing protein 3A OS=Homo sapiens GN=ATAD3A PE=1 SV=2	1	18	33	71.368	634	0	180.52	9455900	8843100	612840	1.2979	4.66943	3.37152	1335
P47929	Galectin-7	LGALS7	sp|P47929|LEG7_HUMAN Galectin-7 OS=Homo sapiens GN=LGALS7 PE=1 SV=2	1	3	27.2	15.075	136	0	33.328	1505600	1407800	97814	1.29419	2.01832	0.724127	545
O94832	Unconventional myosin-Id	MYO1D	sp|O94832|MYO1D_HUMAN Unconventional myosin-Id OS=Homo sapiens GN=MYO1D PE=1 SV=2	1	3	3.7	116.2	1006	0	22.272	83783	78326	5457.4	1.29014	-2.14949	-3.43963	203
P61247	40S ribosomal protein S3a	RPS3A	sp|P61247|RS3A_HUMAN 40S ribosomal protein S3a OS=Homo sapiens GN=RPS3A PE=1 SV=2	1	6	25	29.945	264	0	39.079	2278800	2130000	148760	1.28673	2.61573	1.329	648
Q08188	Protein-glutamine gamma-glutamyltransferase E;Protein-glutamine gamma-glutamyltransferase E 50 kDa catalytic chain;Protein-glutamine gamma-glutamyltransferase E 27 kDa non-catalytic chain	TGM3	sp|Q08188|TGM3_HUMAN Protein-glutamine gamma-glutamyltransferase E OS=Homo sapiens GN=TGM3 PE=1 SV=4	1	4	6.3	76.631	693	0	35.636	590460	551830	38633	1.28325	0.66717	-0.61608	762
P57088	Transmembrane protein 33	TMEM33	sp|P57088|TMM33_HUMAN Transmembrane protein 33 OS=Homo sapiens GN=TMEM33 PE=1 SV=2	1	5	18.2	27.978	247	0	134.87	6445300	6020800	424440	1.27325	4.11483	2.84158	627
Q86V48	Leucine zipper protein 1	LUZP1	sp|Q86V48|LUZP1_HUMAN Leucine zipper protein 1 OS=Homo sapiens GN=LUZP1 PE=1 SV=2	1	6	6.8	120.27	1076	0	40.991	122720	114550	8170.5	1.25634	-1.60108	-2.85742	1020
O00487	26S proteasome non-ATPase regulatory subunit 14	PSMD14	sp|O00487|PSDE_HUMAN 26S proteasome non-ATPase regulatory subunit 14 OS=Homo sapiens GN=PSMD14 PE=1 SV=1	1	5	21.3	34.577	310	0	40.564	1882700	1757100	125540	1.25391	2.33807	1.08416	77
O14744	Protein arginine N-methyltransferase 5;Protein arginine N-methyltransferase 5, N-terminally processed	PRMT5	sp|O14744|ANM5_HUMAN Protein arginine N-methyltransferase 5 OS=Homo sapiens GN=PRMT5 PE=1 SV=4	1	2	3.9	72.683	637	0.0010449	15.887	218520	203940	14579	1.25311	-0.768909	-2.02202	90
Q70EL1	Inactive ubiquitin carboxyl-terminal hydrolase 54	USP54	sp|Q70EL1|UBP54_HUMAN Inactive ubiquitin carboxyl-terminal hydrolase 54 OS=Homo sapiens GN=USP54 PE=1 SV=4	1	3	2	187.39	1684	0	16.721	29293	27323	1970.4	1.24049	-3.66887	-4.90935	986
Q99623	Prohibitin-2	PHB2	sp|Q99623|PHB2_HUMAN Prohibitin-2 OS=Homo sapiens GN=PHB2 PE=1 SV=2	1	6	25.4	33.296	299	0	114.43	2043100	1905600	137450	1.2402	2.45512	1.21492	1194
P36542	ATP synthase subunit gamma, mitochondrial	ATP5C1	sp|P36542|ATPG_HUMAN ATP synthase subunit gamma, mitochondrial OS=Homo sapiens GN=ATP5C1 PE=1 SV=1	1	7	25.2	32.996	298	0	183.67	5678600	5295100	383530	1.23418	3.92953	2.69535	487
Q9UBB4	Ataxin-10	ATXN10	sp|Q9UBB4|ATX10_HUMAN Ataxin-10 OS=Homo sapiens GN=ATXN10 PE=1 SV=1	1	3	7.8	53.488	475	0	22.638	116950	109050	7905.4	1.23294	-1.67206	-2.905	1370
O15160	DNA-directed RNA polymerases I and III subunit RPAC1	POLR1C	sp|O15160|RPAC1_HUMAN DNA-directed RNA polymerases I and III subunit RPAC1 OS=Homo sapiens GN=POLR1C PE=1 SV=1	1	5	18.5	39.249	346	0	64.137	799300	745270	54032	1.23281	1.10071	-0.1321	108
Q13045	Protein flightless-1 homolog	FLII	sp|Q13045|FLII_HUMAN Protein flightless-1 homolog OS=Homo sapiens GN=FLII PE=1 SV=2	1	2	2	144.75	1269	0	18.831	43484	40532	2951.9	1.22628	-3.09992	-4.3262	785
P61981	14-3-3 protein gamma;14-3-3 protein gamma, N-terminally processed	YWHAG	sp|P61981|1433G_HUMAN 14-3-3 protein gamma OS=Homo sapiens GN=YWHAG PE=1 SV=2	1	5	21.1	28.302	247	0	34.14	620340	578220	42115	1.22614	0.734564	-0.49158	657
Q92499	ATP-dependent RNA helicase DDX1	DDX1	sp|Q92499|DDX1_HUMAN ATP-dependent RNA helicase DDX1 OS=Homo sapiens GN=DDX1 PE=1 SV=2	1	6	11.5	82.431	740	0	73.653	400280	373100	27180	1.22588	0.102509	-1.12337	1116
Q8TEQ6	Gem-associated protein 5	GEMIN5	sp|Q8TEQ6|GEMI5_HUMAN Gem-associated protein 5 OS=Homo sapiens GN=GEMIN5 PE=1 SV=3	1	12	9.8	168.59	1508	0	82.753	400080	372910	27176	1.22536	0.101774	-1.12358	1099
P55084	Trifunctional enzyme subunit beta, mitochondrial;3-ketoacyl-CoA thiolase	HADHB	sp|P55084|ECHB_HUMAN Trifunctional enzyme subunit beta, mitochondrial OS=Homo sapiens GN=HADHB PE=1 SV=3	1	6	13.1	51.294	474	0	38.653	739670	689320	50347	1.22213	0.988119	-0.234008	618
Q9BSD7	Cancer-related nucleoside-triphosphatase	NTPCR	sp|Q9BSD7|NTPCR_HUMAN Cancer-related nucleoside-triphosphatase OS=Homo sapiens GN=NTPCR PE=1 SV=1	1	7	44.2	20.713	190	0	48.799	2155300	2008600	146710	1.22208	2.53106	1.30898	1222
Q08380	Galectin-3-binding protein	LGALS3BP	sp|Q08380|LG3BP_HUMAN Galectin-3-binding protein OS=Homo sapiens GN=LGALS3BP PE=1 SV=1	1	5	11.8	65.33	585	0	42.674	1122300	1045900	76417	1.22164	1.58962	0.367979	765
Q9UQ35	Serine/arginine repetitive matrix protein 2	SRRM2	sp|Q9UQ35|SRRM2_HUMAN Serine/arginine repetitive matrix protein 2 OS=Homo sapiens GN=SRRM2 PE=1 SV=2	1	3	1.5	299.61	2752	0	17.589	25966	24186	1779.9	1.21124	-3.84481	-5.05605	1430
Q86VP6;O75155	Cullin-associated NEDD8-dissociated protein 1	CAND1	sp|Q86VP6|CAND1_HUMAN Cullin-associated NEDD8-dissociated protein 1 OS=Homo sapiens GN=CAND1 PE=1 SV=2	2	15	15.4	136.37	1230	0	203.25	898460	836050	62407	1.19074	1.26653	0.0757942	1021
P58107	Epiplakin	EPPK1	sp|P58107|EPIPL_HUMAN Epiplakin OS=Homo sapiens GN=EPPK1 PE=1 SV=2	1	20	20.6	555.61	5090	0	258.47	235700	219320	16387	1.18935	-0.664017	-1.85336	630
P63208	S-phase kinase-associated protein 1	SKP1	sp|P63208|SKP1_HUMAN S-phase kinase-associated protein 1 OS=Homo sapiens GN=SKP1 PE=1 SV=2	1	3	16	18.658	163	0	154.74	3576300	3326300	249930	1.18126	3.25879	2.07754	701
Q8IVI9	Nostrin	NOSTRIN	sp|Q8IVI9|NOSTN_HUMAN Nostrin OS=Homo sapiens GN=NOSTRIN PE=1 SV=2	1	1	2.2	57.659	506	0.0070972	6.0825	1351900	1256900	94949	1.17351	1.85474	0.681238	1032
Q8TD19	Serine/threonine-protein kinase Nek9	NEK9	sp|Q8TD19|NEK9_HUMAN Serine/threonine-protein kinase Nek9 OS=Homo sapiens GN=NEK9 PE=1 SV=2	1	6	9.5	107.17	979	0	36.205	282570	262710	19861	1.17239	-0.403584	-1.57598	1094
P07195;Q6ZMR3;P07864	L-lactate dehydrogenase B chain	LDHB	sp|P07195|LDHB_HUMAN L-lactate dehydrogenase B chain OS=Homo sapiens GN=LDHB PE=1 SV=2	3	9	33.5	36.638	334	0	96.801	2464500	2289400	175130	1.1554	2.71984	1.56444	285
Q99714	3-hydroxyacyl-CoA dehydrogenase type-2	HSD17B10	sp|Q99714|HCD2_HUMAN 3-hydroxyacyl-CoA dehydrogenase type-2 OS=Homo sapiens GN=HSD17B10 PE=1 SV=3	1	3	18	26.923	261	0	18.814	614120	570290	43827	1.14874	0.714642	-0.434093	1200
Q9Y6Y8	SEC23-interacting protein	SEC23IP	sp|Q9Y6Y8|S23IP_HUMAN SEC23-interacting protein OS=Homo sapiens GN=SEC23IP PE=1 SV=1	1	9	12.2	111.08	1000	0	97.063	704100	653580	50515	1.14051	0.91131	-0.229202	1491
Q13085;O00763	Acetyl-CoA carboxylase 1;Biotin carboxylase	ACACA	sp|Q13085|ACACA_HUMAN Acetyl-CoA carboxylase 1 OS=Homo sapiens GN=ACACA PE=1 SV=2	2	20	11.5	265.55	2346	0	131.9	343070	318390	24675	1.13661	-0.126259	-1.26286	787
P04792	Heat shock protein beta-1	HSPB1	sp|P04792|HSPB1_HUMAN Heat shock protein beta-1 OS=Homo sapiens GN=HSPB1 PE=1 SV=2	1	8	52.7	22.782	205	0	323.31	11132000	10326000	806090	1.12613	4.89308	3.76695	263
O00410	Importin-5	IPO5	sp|O00410|IPO5_HUMAN Importin-5 OS=Homo sapiens GN=IPO5 PE=1 SV=4	1	15	19.4	123.63	1097	0	248.5	1808100	1676500	131530	1.11892	2.27033	1.15141	74
O15294	UDP-N-acetylglucosamine--peptide N-acetylglucosaminyltransferase 110 kDa subunit	OGT	sp|O15294|OGT1_HUMAN UDP-N-acetylglucosamine--peptide N-acetylglucosaminyltransferase 110 kDa subunit OS=Homo sapiens GN=OGT PE=1 SV=3	1	12	16.7	116.92	1046	0	101.52	848350	786010	62342	1.1032	1.17749	0.0742903	112
Q13454	Tumor suppressor candidate 3	TUSC3	sp|Q13454|TUSC3_HUMAN Tumor suppressor candidate 3 OS=Homo sapiens GN=TUSC3 PE=1 SV=1	1	1	2	39.676	348	0.0022676	6.6174	552030	511230	40800	1.09426	0.556919	-0.537345	805
Q9Y3L5	Ras-related protein Rap-2c	RAP2C	sp|Q9Y3L5|RAP2C_HUMAN Ras-related protein Rap-2c OS=Homo sapiens GN=RAP2C PE=1 SV=1	1	1	4.9	20.745	183	0.0071225	6.1075	282530	261640	20892	1.09349	-0.409472	-1.50296	1457
A6NIE6	Putative RRN3-like protein RRN3P2	RRN3P2	sp|A6NIE6|RN3P2_HUMAN Putative RRN3-like protein RRN3P2 OS=Homo sapiens GN=RRN3P2 PE=5 SV=3	1	1	3.2	38.034	340	0.0022831	6.7134	2489100	2304900	184120	1.09292	2.72958	1.63666	17
P49792	E3 SUMO-protein ligase RanBP2	RANBP2	sp|P49792|RBP2_HUMAN E3 SUMO-protein ligase RanBP2 OS=Homo sapiens GN=RANBP2 PE=1 SV=2	1	16	5.6	358.2	3224	0	108.81	217230	201110	16122	1.08782	-0.789068	-1.87688	565
Q9UKN8	General transcription factor 3C polypeptide 4	GTF3C4	sp|Q9UKN8|TF3C4_HUMAN General transcription factor 3C polypeptide 4 OS=Homo sapiens GN=GTF3C4 PE=1 SV=2	1	3	3.5	91.981	822	0	16.617	94642	87573	7068.6	1.07792	-1.9885	-3.06642	1406
O94776	Metastasis-associated protein MTA2	MTA2	sp|O94776|MTA2_HUMAN Metastasis-associated protein MTA2 OS=Homo sapiens GN=MTA2 PE=1 SV=1	1	2	4	75.022	668	0.0016708	10.75	45950	42457	3493.3	1.05027	-3.03298	-4.08325	199
P05089	Arginase-1	ARG1	sp|P05089|ARGI1_HUMAN Arginase-1 OS=Homo sapiens GN=ARG1 PE=1 SV=2	1	4	15.8	34.735	322	0	22.907	429670	396950	32726	1.04738	0.191904	-0.855476	268
Q14974	Importin subunit beta-1	KPNB1	sp|Q14974|IMB1_HUMAN Importin subunit beta-1 OS=Homo sapiens GN=KPNB1 PE=1 SV=2	1	16	22.1	97.169	876	0	323.31	4001700	3696100	305610	1.04317	3.41088	2.36771	854
P46777	60S ribosomal protein L5	RPL5	sp|P46777|RL5_HUMAN 60S ribosomal protein L5 OS=Homo sapiens GN=RPL5 PE=1 SV=3	1	4	16.2	34.362	297	0	40.197	1175200	1085400	89830	1.04182	1.6431	0.601284	534
Q96RT7	Gamma-tubulin complex component 6	TUBGCP6	sp|Q96RT7|GCP6_HUMAN Gamma-tubulin complex component 6 OS=Homo sapiens GN=TUBGCP6 PE=1 SV=3	1	3	3	200.5	1819	0	18.636	52283	48283	4000.4	1.04023	-2.84747	-3.8877	1180
P46783;S4R435;Q9NQ39	40S ribosomal protein S10;Putative 40S ribosomal protein S10-like	RPS10;RPS10-NUDT3;RPS10P5	sp|P46783|RS10_HUMAN 40S ribosomal protein S10 OS=Homo sapiens GN=RPS10 PE=1 SV=1;tr|S4R435|S4R435_HUMAN Protein RPS10-NUDT3 (Fragment) OS=Homo sapiens GN=RPS10-NUDT3 PE=3 SV=1;sp|Q9NQ39|RS10L_HUMAN Putative 40S ribosomal protein S10-like OS=Homo sapiens G	3	4	23.6	18.898	165	0	33.699	6097200	5630400	466730	1.03951	4.01811	2.9786	539
Q2M1P5	Kinesin-like protein KIF7	KIF7	sp|Q2M1P5|KIF7_HUMAN Kinesin-like protein KIF7 OS=Homo sapiens GN=KIF7 PE=1 SV=2	1	2	1.9	150.59	1343	0.0017021	10.97	19058	17581	1477.3	1.01991	-4.30497	-5.32488	908
P84085	ADP-ribosylation factor 5	ARF5	sp|P84085|ARF5_HUMAN ADP-ribosylation factor 5 OS=Homo sapiens GN=ARF5 PE=1 SV=2	1	3	17.2	20.529	180	0.0023184	7.0084	170400	157160	13236	1.01663	-1.14482	-2.16145	721
Q12789	General transcription factor 3C polypeptide 1	GTF3C1	sp|Q12789|TF3C1_HUMAN General transcription factor 3C polypeptide 1 OS=Homo sapiens GN=GTF3C1 PE=1 SV=4	1	6	3.6	238.87	2109	0	35.73	149870	138220	11648	1.01574	-1.33009	-2.34583	777
P00390	Glutathione reductase, mitochondrial	GSR	sp|P00390|GSHR_HUMAN Glutathione reductase, mitochondrial OS=Homo sapiens GN=GSR PE=1 SV=2	1	9	22.6	56.256	522	0	57.398	945910	872290	73623	1.01351	1.32775	0.314243	241
P25398	40S ribosomal protein S12	RPS12	sp|P25398|RS12_HUMAN 40S ribosomal protein S12 OS=Homo sapiens GN=RPS12 PE=1 SV=3	1	2	13.6	14.515	132	0.00086806	11.116	1038800	957810	80961	1.01137	1.46268	0.451313	417
P14923;P35222	Junction plakoglobin	JUP	sp|P14923|PLAK_HUMAN Junction plakoglobin OS=Homo sapiens GN=JUP PE=1 SV=3	2	14	23.9	81.744	745	0	116.17	1615000	1487800	127220	0.994715	2.09805	1.10334	355
P17812	CTP synthase 1	CTPS1	sp|P17812|PYRG1_HUMAN CTP synthase 1 OS=Homo sapiens GN=CTPS1 PE=1 SV=2	1	7	15.9	66.69	591	0	53.908	1065900	981420	84426	0.986042	1.49782	0.511774	369
P12236	ADP/ATP translocase 3;ADP/ATP translocase 3, N-terminally processed	SLC25A6	sp|P12236|ADT3_HUMAN ADP/ATP translocase 3 OS=Homo sapiens GN=SLC25A6 PE=1 SV=4	1	18	51	32.866	298	0	323.31	274610000	252820000	21796000	0.982908	9.50684	8.52393	335
O94906	Pre-mRNA-processing factor 6	PRPF6	sp|O94906|PRP6_HUMAN Pre-mRNA-processing factor 6 OS=Homo sapiens GN=PRPF6 PE=1 SV=1	1	7	8.2	106.92	941	0	39.311	205320	188990	16335	0.979203	-0.878744	-1.85795	204
Q9BTE3	Mini-chromosome maintenance complex-binding protein	MCMBP	sp|Q9BTE3|MCMBP_HUMAN Mini-chromosome maintenance complex-binding protein OS=Homo sapiens GN=MCMBP PE=1 SV=2	1	5	8.3	72.979	642	0	30.883	349640	321810	27838	0.978013	-0.110846	-1.08886	1227
Q9UL18;Q9UKV8;Q9H9G7	Protein argonaute-1;Protein argonaute-2;Protein argonaute-3	AGO1;AGO2;AGO3	sp|Q9UL18|AGO1_HUMAN Protein argonaute-1 OS=Homo sapiens GN=AGO1 PE=1 SV=3;sp|Q9UKV8|AGO2_HUMAN Protein argonaute-2 OS=Homo sapiens GN=AGO2 PE=1 SV=3;sp|Q9H9G7|AGO3_HUMAN Protein argonaute-3 OS=Homo sapiens GN=AGO3 PE=1 SV=2	3	2	2.7	97.213	857	0.00085397	11	51516	47383	4132.4	0.966249	-2.87461	-3.84086	1408
P47755	F-actin-capping protein subunit alpha-2	CAPZA2	sp|P47755|CAZA2_HUMAN F-actin-capping protein subunit alpha-2 OS=Homo sapiens GN=CAPZA2 PE=1 SV=3	1	5	22	32.949	286	0	30.708	1368500	1258600	109920	0.964226	1.85669	0.892467	542
P01040	Cystatin-A;Cystatin-A, N-terminally processed	CSTA	sp|P01040|CYTA_HUMAN Cystatin-A OS=Homo sapiens GN=CSTA PE=1 SV=1	1	5	59.2	11.006	98	0	47.841	2689800	2473700	216120	0.963697	2.83154	1.86785	247
Q5T4S7	E3 ubiquitin-protein ligase UBR4	UBR4	sp|Q5T4S7|UBR4_HUMAN E3 ubiquitin-protein ligase UBR4 OS=Homo sapiens GN=UBR4 PE=1 SV=1	1	31	7.2	573.83	5183	0	236.7	351860	323530	28331	0.960377	-0.103155	-1.06353	937
P54136	Arginine--tRNA ligase, cytoplasmic	RARS	sp|P54136|SYRC_HUMAN Arginine--tRNA ligase, cytoplasmic OS=Homo sapiens GN=RARS PE=1 SV=2	1	10	16.1	75.378	660	0	77.751	1531600	1408200	123330	0.960188	2.01873	1.05854	607
Q9Y2L1	Exosome complex exonuclease RRP44	DIS3	sp|Q9Y2L1|RRP44_HUMAN Exosome complex exonuclease RRP44 OS=Homo sapiens GN=DIS3 PE=1 SV=2	1	10	12.9	109	958	0	61.408	347080	319030	28055	0.954294	-0.123362	-1.07766	1446
P52789;P52790	Hexokinase-2	HK2	sp|P52789|HXK2_HUMAN Hexokinase-2 OS=Homo sapiens GN=HK2 PE=1 SV=2	2	20	25.4	102.38	917	0	165.19	1567500	1440500	126920	0.951509	2.05144	1.09993	596
Q9Y678;Q9UBF2	Coatomer subunit gamma-1	COPG1	sp|Q9Y678|COPG1_HUMAN Coatomer subunit gamma-1 OS=Homo sapiens GN=COPG1 PE=1 SV=1	2	8	10.8	97.717	874	0	57.937	463340	425760	37582	0.948858	0.292986	-0.655872	1484
O15020	Spectrin beta chain, non-erythrocytic 2	SPTBN2	sp|O15020|SPTN2_HUMAN Spectrin beta chain, non-erythrocytic 2 OS=Homo sapiens GN=SPTBN2 PE=1 SV=3	1	1	0.3	271.32	2390	0.0077031	6.0252	590320	542200	48122	0.940989	0.641771	-0.299217	104
Q9NPF4	Probable tRNA N6-adenosine threonylcarbamoyltransferase	OSGEP	sp|Q9NPF4|OSGEP_HUMAN Probable tRNA N6-adenosine threonylcarbamoyltransferase OS=Homo sapiens GN=OSGEP PE=1 SV=1	1	2	6.9	36.426	335	0.00092937	11.791	140160	128690	11469	0.935021	-1.43315	-2.36817	1307
Q8IW35	Centrosomal protein of 97 kDa	CEP97	sp|Q8IW35|CEP97_HUMAN Centrosomal protein of 97 kDa OS=Homo sapiens GN=CEP97 PE=1 SV=1	1	3	4	96.98	865	0	20.058	105470	96844	8631	0.934996	-1.84332	-2.77831	1033
P53992	Protein transport protein Sec24C	SEC24C	sp|P53992|SC24C_HUMAN Protein transport protein Sec24C OS=Homo sapiens GN=SEC24C PE=1 SV=3	1	8	10.1	118.32	1094	0	66.622	865240	794360	70882	0.933233	1.19274	0.259506	606
Q9Y2H6	Fibronectin type-III domain-containing protein 3A	FNDC3A	sp|Q9Y2H6|FND3A_HUMAN Fibronectin type-III domain-containing protein 3A OS=Homo sapiens GN=FNDC3A PE=1 SV=4	1	2	2	131.85	1198	0.0010183	13.528	62448	57319	5129.7	0.928999	-2.59997	-3.52897	1444
Q9NV70	Exocyst complex component 1	EXOC1	sp|Q9NV70|EXOC1_HUMAN Exocyst complex component 1 OS=Homo sapiens GN=EXOC1 PE=1 SV=4	1	1	1.2	101.98	894	0.0029433	6.3801	34941	32057	2883.7	0.921577	-3.43834	-4.35992	1331
P62424	60S ribosomal protein L7a	RPL7A	sp|P62424|RL7A_HUMAN 60S ribosomal protein L7a OS=Homo sapiens GN=RPL7A PE=1 SV=2	1	7	30.5	29.995	266	0	63.475	3254400	2985200	269200	0.918009	3.1027	2.18469	676
P21283	V-type proton ATPase subunit C 1	ATP6V1C1	sp|P21283|VATC1_HUMAN V-type proton ATPase subunit C 1 OS=Homo sapiens GN=ATP6V1C1 PE=1 SV=4	1	3	8.9	43.941	382	0	18.512	215320	197340	17976	0.903472	-0.81637	-1.71984	388
P33981	Dual specificity protein kinase TTK	TTK	sp|P33981|TTK_HUMAN Dual specificity protein kinase TTK OS=Homo sapiens GN=TTK PE=1 SV=2	1	6	9.7	97.071	857	0	43.153	224940	206090	18855	0.897186	-0.75378	-1.65097	466
H7C0C1;P48047	ATP synthase subunit O, mitochondrial	ATP5O	tr|H7C0C1|H7C0C1_HUMAN Uncharacterized protein (Fragment) OS=Homo sapiens PE=4 SV=2;sp|P48047|ATPO_HUMAN ATP synthase subunit O, mitochondrial OS=Homo sapiens GN=ATP5O PE=1 SV=1	2	2	10.3	26.799	242	0.0010132	13.29	282270	258590	23684	0.895614	-0.426388	-1.322	65
Q9HCK8;Q9P2D1	Chromodomain-helicase-DNA-binding protein 8	CHD8	sp|Q9HCK8|CHD8_HUMAN Chromodomain-helicase-DNA-binding protein 8 OS=Homo sapiens GN=CHD8 PE=1 SV=5	2	3	1.4	290.52	2581	0	16.951	32416	29651	2765.1	0.869609	-3.5509	-4.42051	1299
Q15517	Corneodesmosin	CDSN	sp|Q15517|CDSN_HUMAN Corneodesmosin OS=Homo sapiens GN=CDSN PE=1 SV=3	1	1	3.4	51.522	529	0.0036153	6.2496	528800	483470	45335	0.86166	0.476372	-0.385288	888
Q9BZE1	39S ribosomal protein L37, mitochondrial	MRPL37	sp|Q9BZE1|RM37_HUMAN 39S ribosomal protein L37, mitochondrial OS=Homo sapiens GN=MRPL37 PE=1 SV=2	1	2	7.8	48.117	423	0.00098039	12.476	143700	131380	12328	0.860666	-1.40331	-2.26398	1247
P12235	ADP/ATP translocase 1	SLC25A4	sp|P12235|ADT1_HUMAN ADP/ATP translocase 1 OS=Homo sapiens GN=SLC25A4 PE=1 SV=4	1	12	33.2	33.064	298	0	39.754	982530	898140	84389	0.858746	1.36989	0.511141	334
Q9UK41	Vacuolar protein sorting-associated protein 28 homolog	VPS28	sp|Q9UK41|VPS28_HUMAN Vacuolar protein sorting-associated protein 28 homolog OS=Homo sapiens GN=VPS28 PE=1 SV=1	1	2	15.8	25.425	221	0	42.637	1293900	1182600	111280	0.856628	1.76684	0.910208	1404
P62753	40S ribosomal protein S6	RPS6	sp|P62753|RS6_HUMAN 40S ribosomal protein S6 OS=Homo sapiens GN=RPS6 PE=1 SV=1	1	3	14.1	28.68	249	0	21.316	1532900	1400800	132060	0.853918	2.01113	1.15721	681
P28066	Proteasome subunit alpha type-5	PSMA5	sp|P28066|PSA5_HUMAN Proteasome subunit alpha type-5 OS=Homo sapiens GN=PSMA5 PE=1 SV=3	1	5	32	26.411	241	0	106.03	2026000	1850900	175060	0.849237	2.4131	1.56386	435
P78347;Q86UP8;Q6EKJ0	General transcription factor II-I	GTF2I	sp|P78347|GTF2I_HUMAN General transcription factor II-I OS=Homo sapiens GN=GTF2I PE=1 SV=2	3	23	29.8	112.42	998	0	174.18	2360800	2156600	204150	0.847988	2.63363	1.78564	716
O60343	TBC1 domain family member 4	TBC1D4	sp|O60343|TBCD4_HUMAN TBC1 domain family member 4 OS=Homo sapiens GN=TBC1D4 PE=1 SV=2	1	2	2.1	146.56	1298	0.0010091	13.187	40740	37207	3532.7	0.843663	-3.22341	-4.06707	153
P27708;P31327	CAD protein;Glutamine-dependent carbamoyl-phosphate synthase;Aspartate carbamoyltransferase;Dihydroorotase	CAD	sp|P27708|PYR1_HUMAN CAD protein OS=Homo sapiens GN=CAD PE=1 SV=3	2	58	33.8	242.98	2225	0	323.31	8906000	8133500	772470	0.843256	4.54875	3.70549	433
P29508;P48594	Serpin B3;Serpin B4	SERPINB3;SERPINB4	sp|P29508|SPB3_HUMAN Serpin B3 OS=Homo sapiens GN=SERPINB3 PE=1 SV=2;sp|P48594|SPB4_HUMAN Serpin B4 OS=Homo sapiens GN=SERPINB4 PE=1 SV=2	2	11	31.8	44.564	390	0	89.294	4728900	4317200	411720	0.837292	3.63497	2.79768	442
Q8NDV3	Structural maintenance of chromosomes protein 1B	SMC1B	sp|Q8NDV3|SMC1B_HUMAN Structural maintenance of chromosomes protein 1B OS=Homo sapiens GN=SMC1B PE=2 SV=2	1	1	0.6	143.91	1235	0.0022422	6.4817	116770	106480	10290	0.818198	-1.70647	-2.52467	1071
Q96P47	Arf-GAP with GTPase, ANK repeat and PH domain-containing protein 3	AGAP3	sp|Q96P47|AGAP3_HUMAN Arf-GAP with GTPase, ANK repeat and PH domain-containing protein 3 OS=Homo sapiens GN=AGAP3 PE=1 SV=2	1	2	2.6	95.043	875	0.00093284	11.812	54953	50110	4843.2	0.817998	-2.79388	-3.61188	1173
P46776	60S ribosomal protein L27a	RPL27A	sp|P46776|RL27A_HUMAN 60S ribosomal protein L27a OS=Homo sapiens GN=RPL27A PE=1 SV=2	1	3	22.3	16.561	148	0	18.445	1795800	1637400	158440	0.81633	2.23628	1.41995	533
P49915	GMP synthase [glutamine-hydrolyzing]	GMPS	sp|P49915|GUAA_HUMAN GMP synthase [glutamine-hydrolyzing] OS=Homo sapiens GN=GMPS PE=1 SV=1	1	4	5.8	76.715	693	0	22.575	248090	226170	21918	0.814152	-0.619646	-1.4338	567
P19388	DNA-directed RNA polymerases I, II, and III subunit RPABC1	POLR2E	sp|P19388|RPAB1_HUMAN DNA-directed RNA polymerases I, II, and III subunit RPABC1 OS=Homo sapiens GN=POLR2E PE=1 SV=4	1	4	23.3	24.551	210	0	116.39	2179500	1986900	192640	0.813473	2.51539	1.70192	380
Q53GA4	Pleckstrin homology-like domain family A member 2	PHLDA2	sp|Q53GA4|PHLA2_HUMAN Pleckstrin homology-like domain family A member 2 OS=Homo sapiens GN=PHLDA2 PE=1 SV=2	1	2	27	17.092	152	0.001004	13.007	913000	832030	80967	0.808163	1.25958	0.45142	917
Q5VWN6	Protein FAM208B	FAM208B	sp|Q5VWN6|F208B_HUMAN Protein FAM208B OS=Homo sapiens GN=FAM208B PE=1 SV=1	1	1	0.5	268.84	2430	0.0022206	6.4132	8967.8	8171.3	796.54	0.805679	-5.41034	-6.21602	944
Q9HAV4	Exportin-5	XPO5	sp|Q9HAV4|XPO5_HUMAN Exportin-5 OS=Homo sapiens GN=XPO5 PE=1 SV=1	1	3	2.4	136.31	1204	0	18.646	94953	86514	8438.5	0.804808	-2.00605	-2.81086	1294
Q02978	Mitochondrial 2-oxoglutarate/malate carrier protein	SLC25A11	sp|Q02978|M2OM_HUMAN Mitochondrial 2-oxoglutarate/malate carrier protein OS=Homo sapiens GN=SLC25A11 PE=1 SV=3	1	11	47.5	34.061	314	0	305.61	5029600	4581900	447670	0.80237	3.72082	2.91845	745
Q92973	Transportin-1	TNPO1	sp|Q92973|TNPO1_HUMAN Transportin-1 OS=Homo sapiens GN=TNPO1 PE=1 SV=2	1	3	4.7	102.35	898	0	39.672	171840	156530	15309	0.800919	-1.15062	-1.95153	1136
Q8IWZ3	Ankyrin repeat and KH domain-containing protein 1	ANKHD1	sp|Q8IWZ3|ANKH1_HUMAN Ankyrin repeat and KH domain-containing protein 1 OS=Homo sapiens GN=ANKHD1 PE=1 SV=1	1	20	9.7	269.45	2542	0	58.484	232720	211980	20739	0.800443	-0.713125	-1.51357	1037
O95613	Pericentrin	PCNT	sp|O95613|PCNT_HUMAN Pericentrin OS=Homo sapiens GN=PCNT PE=1 SV=4	1	8	3	378.03	3336	0	62.844	62953	57299	5653.8	0.788149	-2.60047	-3.38862	226
Q9UJS0	Calcium-binding mitochondrial carrier protein Aralar2	SLC25A13	sp|Q9UJS0|CMC2_HUMAN Calcium-binding mitochondrial carrier protein Aralar2 OS=Homo sapiens GN=SLC25A13 PE=1 SV=2	1	23	39.4	74.175	675	0	323.31	8957100	8151100	806000	0.785074	4.55187	3.76679	1399
P52292	Importin subunit alpha-1	KPNA2	sp|P52292|IMA1_HUMAN Importin subunit alpha-1 OS=Homo sapiens GN=KPNA2 PE=1 SV=1	1	9	22.9	57.861	529	0	141.47	2459100	2236800	222340	0.777529	2.68631	1.90878	590
P22314	Ubiquitin-like modifier-activating enzyme 1	UBA1	sp|P22314|UBA1_HUMAN Ubiquitin-like modifier-activating enzyme 1 OS=Homo sapiens GN=UBA1 PE=1 SV=3	1	13	16.3	117.85	1058	0	215.94	1212600	1102600	110010	0.772135	1.66578	0.893648	399
Q13616	Cullin-1	CUL1	sp|Q13616|CUL1_HUMAN Cullin-1 OS=Homo sapiens GN=CUL1 PE=1 SV=2	1	2	3.1	89.677	776	0.0016906	10.893	141850	128950	12894	0.768971	-1.43024	-2.19921	809
Q9BY89	Uncharacterized protein KIAA1671	KIAA1671	sp|Q9BY89|K1671_HUMAN Uncharacterized protein KIAA1671 OS=Homo sapiens GN=KIAA1671 PE=1 SV=2	1	2	1.7	196.71	1806	0.00090992	11.557	13392	12156	1236.2	0.744617	-4.83731	-5.58193	1245
O00443	Phosphatidylinositol 4-phosphate 3-kinase C2 domain-containing subunit alpha	PIK3C2A	sp|O00443|P3C2A_HUMAN Phosphatidylinositol 4-phosphate 3-kinase C2 domain-containing subunit alpha OS=Homo sapiens GN=PIK3C2A PE=1 SV=2	1	4	2.8	190.68	1686	0	29.282	64054	58116	5937.4	0.737964	-2.58005	-3.31801	75
P31943;P55795	Heterogeneous nuclear ribonucleoprotein H;Heterogeneous nuclear ribonucleoprotein H, N-terminally processed	HNRNPH1	sp|P31943|HNRH1_HUMAN Heterogeneous nuclear ribonucleoprotein H OS=Homo sapiens GN=HNRNPH1 PE=1 SV=4	2	11	37.9	49.229	449	0	211.67	9359700	8488500	871160	0.731432	4.61038	3.87895	458
Q7Z5K2	Wings apart-like protein homolog	WAPAL	sp|Q7Z5K2|WAPL_HUMAN Wings apart-like protein homolog OS=Homo sapiens GN=WAPL PE=1 SV=1	1	2	2.1	132.94	1190	0.00095057	11.953	36835	33399	3436.6	0.727683	-3.37918	-4.10686	1009
Q9HCN8	Stromal cell-derived factor 2-like protein 1	SDF2L1	sp|Q9HCN8|SDF2L_HUMAN Stromal cell-derived factor 2-like protein 1 OS=Homo sapiens GN=SDF2L1 PE=1 SV=2	1	2	14.9	23.598	221	0.00089526	11.401	279840	253660	26184	0.723069	-0.454159	-1.17723	1301
Q9P2R3	Rabankyrin-5	ANKFY1	sp|Q9P2R3|ANFY1_HUMAN Rabankyrin-5 OS=Homo sapiens GN=ANKFY1 PE=1 SV=2	1	4	4.9	128.4	1169	0	30.75	147430	133620	13810	0.721283	-1.37892	-2.1002	1368
Q13283	Ras GTPase-activating protein-binding protein 1	G3BP1	sp|Q13283|G3BP1_HUMAN Ras GTPase-activating protein-binding protein 1 OS=Homo sapiens GN=G3BP1 PE=1 SV=1	1	5	15	52.164	466	0	49.436	544890	493850	51042	0.721248	0.507019	-0.214229	798
O95817	BAG family molecular chaperone regulator 3	BAG3	sp|O95817|BAG3_HUMAN BAG family molecular chaperone regulator 3 OS=Homo sapiens GN=BAG3 PE=1 SV=3	1	14	32.7	61.594	575	0	102.17	1612800	1461600	151240	0.719568	2.07242	1.35285	232
P55072	Transitional endoplasmic reticulum ATPase	VCP	sp|P55072|TERA_HUMAN Transitional endoplasmic reticulum ATPase OS=Homo sapiens GN=VCP PE=1 SV=4	1	18	28.4	89.321	806	0	148.23	1500700	1358900	141790	0.707544	1.96731	1.25977	617
P02452	Collagen alpha-1(I) chain	COL1A1	sp|P02452|CO1A1_HUMAN Collagen alpha-1(I) chain OS=Homo sapiens GN=COL1A1 PE=1 SV=5	1	4	4.7	138.94	1464	0	21.824	53059	48026	5033.8	0.701028	-2.85517	-3.55619	250
P00338	L-lactate dehydrogenase A chain	LDHA	sp|P00338|LDHA_HUMAN L-lactate dehydrogenase A chain OS=Homo sapiens GN=LDHA PE=1 SV=2	1	3	9.9	36.688	332	0.0010395	14.834	603810	546210	57596	0.692347	0.652401	-0.0399456	238
Q8WWM7	Ataxin-2-like protein	ATXN2L	sp|Q8WWM7|ATX2L_HUMAN Ataxin-2-like protein OS=Homo sapiens GN=ATXN2L PE=1 SV=2	1	10	13.9	113.37	1075	0	75.759	1003100	906950	96165	0.68437	1.38397	0.699598	1112
Q13347	Eukaryotic translation initiation factor 3 subunit I	EIF3I	sp|Q13347|EIF3I_HUMAN Eukaryotic translation initiation factor 3 subunit I OS=Homo sapiens GN=EIF3I PE=1 SV=1	1	12	48.9	36.501	325	0	323.31	7605500	6875200	730260	0.681852	4.30628	3.62442	800
B2RU33;H3BUK9;Q6S5H4;A0JP26;Q86YR6	POTE ankyrin domain family member C;POTE ankyrin domain family member B2;POTE ankyrin domain family member B;POTE ankyrin domain family member B3;POTE ankyrin domain family member D	POTEC;POTEB2;POTEB;POTEB3;POTED	sp|B2RU33|POTEC_HUMAN POTE ankyrin domain family member C OS=Homo sapiens GN=POTEC PE=2 SV=2;sp|H3BUK9|POTB2_HUMAN POTE ankyrin domain family member B2 OS=Homo sapiens GN=POTEB2 PE=3 SV=1;sp|Q6S5H4|POTEB_HUMAN POTE ankyrin domain family member B OS=Homo sa	5	2	3	61.188	542	0.00087413	11.159	952280	860250	92035	0.671432	1.3077	0.636269	9
Q14008	Cytoskeleton-associated protein 5	CKAP5	sp|Q14008|CKAP5_HUMAN Cytoskeleton-associated protein 5 OS=Homo sapiens GN=CKAP5 PE=1 SV=3	1	7	3.9	225.49	2032	0	46.35	72382	65328	7053.3	0.658263	-2.41128	-3.06954	822
P51610;Q9Y5Z7	Host cell factor 1;HCF N-terminal chain 1;HCF N-terminal chain 2;HCF N-terminal chain 3;HCF N-terminal chain 4;HCF N-terminal chain 5;HCF N-terminal chain 6;HCF C-terminal chain 1;HCF C-terminal chain 2;HCF C-terminal chain 3;HCF C-terminal chain 4;HCF C-terminal chain 5;HCF C-terminal chain 6	HCFC1	sp|P51610|HCFC1_HUMAN Host cell factor 1 OS=Homo sapiens GN=HCFC1 PE=1 SV=2	2	9	5.3	208.73	2035	0	60.71	406320	366600	39718	0.653274	0.0771523	-0.576121	583
Q9UBS4	DnaJ homolog subfamily B member 11	DNAJB11	sp|Q9UBS4|DJB11_HUMAN DnaJ homolog subfamily B member 11 OS=Homo sapiens GN=DNAJB11 PE=1 SV=1	1	5	20.9	40.513	358	0	99.779	1232500	1110600	121910	0.634384	1.67621	1.04183	1376
Q9UG63	ATP-binding cassette sub-family F member 2	ABCF2	sp|Q9UG63|ABCF2_HUMAN ATP-binding cassette sub-family F member 2 OS=Homo sapiens GN=ABCF2 PE=1 SV=2	1	4	7.7	71.289	623	0	22.908	326980	294510	32465	0.628291	-0.238737	-0.867028	1382
P54277	PMS1 protein homolog 1	PMS1	sp|P54277|PMS1_HUMAN PMS1 protein homolog 1 OS=Homo sapiens GN=PMS1 PE=1 SV=1	1	1	1.2	105.83	932	0.0050215	6.1611	8586.1	7728.7	857.36	0.619184	-5.49068	-6.10987	608
Q8NCW5	NAD(P)H-hydrate epimerase	APOA1BP	sp|Q8NCW5|NNRE_HUMAN NAD(P)H-hydrate epimerase OS=Homo sapiens GN=APOA1BP PE=1 SV=2	1	5	22.6	31.674	288	0	182.71	2539400	2285800	253620	0.618891	2.71757	2.09868	1069
Q8IUQ4;O43255	E3 ubiquitin-protein ligase SIAH1	SIAH1	sp|Q8IUQ4|SIAH1_HUMAN E3 ubiquitin-protein ligase SIAH1 OS=Homo sapiens GN=SIAH1 PE=1 SV=2	2	6	24.1	31.123	282	0	56.419	2773300	2495900	277450	0.616192	2.84443	2.22824	1029
Q96D71	RalBP1-associated Eps domain-containing protein 1	REPS1	sp|Q96D71|REPS1_HUMAN RalBP1-associated Eps domain-containing protein 1 OS=Homo sapiens GN=REPS1 PE=1 SV=3	1	2	3	86.661	796	0.00099206	12.803	35432	31886	3546.1	0.615549	-3.44606	-4.06161	1154
Q14680	Maternal embryonic leucine zipper kinase	MELK	sp|Q14680|MELK_HUMAN Maternal embryonic leucine zipper kinase OS=Homo sapiens GN=MELK PE=1 SV=3	1	2	3.8	74.641	651	0.00086505	11.099	113670	102270	11396	0.612715	-1.76467	-2.37739	849
Q9NZJ4	Sacsin	SACS	sp|Q9NZJ4|SACS_HUMAN Sacsin OS=Homo sapiens GN=SACS PE=1 SV=2	1	35	8.9	521.12	4579	0	256.75	326790	294010	32784	0.611734	-0.241188	-0.852922	1354
E9PL57;Q15843	NEDD8	NEDD8-MDP1;NEDD8	tr|E9PL57|E9PL57_HUMAN Protein NEDD8-MDP1 (Fragment) OS=Homo sapiens GN=NEDD8-MDP1 PE=4 SV=1;sp|Q15843|NEDD8_HUMAN NEDD8 OS=Homo sapiens GN=NEDD8 PE=1 SV=1	2	2	8.2	19.536	170	0	21.839	847610	762060	85557	0.601879	1.13285	0.530972	62
Q8NC51	Plasminogen activator inhibitor 1 RNA-binding protein	SERBP1	sp|Q8NC51|PAIRB_HUMAN Plasminogen activator inhibitor 1 RNA-binding protein OS=Homo sapiens GN=SERBP1 PE=1 SV=2	1	1	2.7	44.965	408	0.0070771	6.0605	168150	151170	16978	0.601365	-1.20088	-1.80225	1065
P52272	Heterogeneous nuclear ribonucleoprotein M	HNRNPM	sp|P52272|HNRPM_HUMAN Heterogeneous nuclear ribonucleoprotein M OS=Homo sapiens GN=HNRNPM PE=1 SV=3	1	15	27.7	77.515	730	0	130.47	1861500	1672400	189080	0.591784	2.26679	1.67501	589
P06493	Cyclin-dependent kinase 1	CDK1	sp|P06493|CDK1_HUMAN Cyclin-dependent kinase 1 OS=Homo sapiens GN=CDK1 PE=1 SV=3	1	11	41.1	34.095	297	0	109.15	2676100	2402000	274160	0.578077	2.78911	2.21103	278
Q9UNM6	26S proteasome non-ATPase regulatory subunit 13	PSMD13	sp|Q9UNM6|PSD13_HUMAN 26S proteasome non-ATPase regulatory subunit 13 OS=Homo sapiens GN=PSMD13 PE=1 SV=2	1	5	13.8	42.945	376	0	34.098	570970	511760	59213	0.558413	0.558413	0	1423
Q9NNX1	Tuftelin	TUFT1	sp|Q9NNX1|TUFT1_HUMAN Tuftelin OS=Homo sapiens GN=TUFT1 PE=1 SV=1	1	9	22.3	44.263	390	0	75.02	1429600	1280800	148790	0.552628	1.88192	1.32929	1306
P60174	Triosephosphate isomerase	TPI1	sp|P60174|TPIS_HUMAN Triosephosphate isomerase OS=Homo sapiens GN=TPI1 PE=1 SV=3	1	1	4.2	30.791	286	0.0036101	6.2307	151840	135970	15871	0.545755	-1.35377	-1.89952	632
Q15369	Transcription elongation factor B polypeptide 1	TCEB1	sp|Q15369|ELOC_HUMAN Transcription elongation factor B polypeptide 1 OS=Homo sapiens GN=TCEB1 PE=1 SV=1	1	4	50	12.473	112	0	28.661	2368400	2117500	250900	0.524111	2.60724	2.08313	878
O94966	Ubiquitin carboxyl-terminal hydrolase 19	USP19	sp|O94966|UBP19_HUMAN Ubiquitin carboxyl-terminal hydrolase 19 OS=Homo sapiens GN=USP19 PE=1 SV=2	1	4	3.9	145.65	1318	0	27.287	84545	75561	8983.9	0.51916	-2.20134	-2.7205	206
Q7Z406	Myosin-14	MYH14	sp|Q7Z406|MYH14_HUMAN Myosin-14 OS=Homo sapiens GN=MYH14 PE=1 SV=2	1	6	3.2	227.87	1995	0.0022388	6.476	35613	31824	3788.7	0.517272	-3.44887	-3.96614	1003
P60842	Eukaryotic initiation factor 4A-I	EIF4A1	sp|P60842|IF4A1_HUMAN Eukaryotic initiation factor 4A-I OS=Homo sapiens GN=EIF4A1 PE=1 SV=1	1	19	49.8	46.153	406	0	212.03	9756600	8717900	1038700	0.516134	4.64886	4.13272	638
Q9NVH2	Integrator complex subunit 7	INTS7	sp|Q9NVH2|INT7_HUMAN Integrator complex subunit 7 OS=Homo sapiens GN=INTS7 PE=1 SV=1	1	2	2.8	106.83	962	0.00090334	11.507	42878	38310	4568.6	0.514829	-3.18126	-3.69609	1333
P41252	Isoleucine--tRNA ligase, cytoplasmic	IARS	sp|P41252|SYIC_HUMAN Isoleucine--tRNA ligase, cytoplasmic OS=Homo sapiens GN=IARS PE=1 SV=2	1	26	23.9	144.5	1262	0	323.31	3999100	3571300	427750	0.508543	3.36132	2.85278	509
Q68CZ6	HAUS augmin-like complex subunit 3	HAUS3	sp|Q68CZ6|HAUS3_HUMAN HAUS augmin-like complex subunit 3 OS=Homo sapiens GN=HAUS3 PE=1 SV=1	1	2	3.6	69.65	603	0.00091241	11.573	62074	55421	6652.4	0.505418	-2.64855	-3.15397	952
P68133;P68032;P63267;P62736	Actin, alpha skeletal muscle;Actin, alpha cardiac muscle 1;Actin, gamma-enteric smooth muscle;Actin, aortic smooth muscle	ACTA1;ACTC1;ACTG2;ACTA2	sp|P68133|ACTS_HUMAN Actin, alpha skeletal muscle OS=Homo sapiens GN=ACTA1 PE=1 SV=1;sp|P68032|ACTC_HUMAN Actin, alpha cardiac muscle 1 OS=Homo sapiens GN=ACTC1 PE=1 SV=1;sp|P63267|ACTH_HUMAN Actin, gamma-enteric smooth muscle OS=Homo sapiens GN=ACTG2 PE=1	4	11	28.6	42.051	377	0.001634	9.0413	878940	784410	94522	0.499819	1.17455	0.674736	706
Q5VUJ6	Leucine-rich repeat and calponin homology domain-containing protein 2	LRCH2	sp|Q5VUJ6|LRCH2_HUMAN Leucine-rich repeat and calponin homology domain-containing protein 2 OS=Homo sapiens GN=LRCH2 PE=2 SV=2	1	1	1.4	84.587	765	0.0015699	7.286	31425	28032	3393	0.493373	-3.63191	-4.12528	943
Q9UGP4	LIM domain-containing protein 1	LIMD1	sp|Q9UGP4|LIMD1_HUMAN LIM domain-containing protein 1 OS=Homo sapiens GN=LIMD1 PE=1 SV=1	1	3	5.5	72.189	676	0.0010504	16.225	102260	91217	11043	0.493102	-1.92968	-2.42278	1384
O75821	Eukaryotic translation initiation factor 3 subunit G	EIF3G	sp|O75821|EIF3G_HUMAN Eukaryotic translation initiation factor 3 subunit G OS=Homo sapiens GN=EIF3G PE=1 SV=2	1	9	33.8	35.611	320	0	323.31	8451200	7536500	914640	0.48955	4.43877	3.94922	195
O14545	TRAF-type zinc finger domain-containing protein 1	TRAFD1	sp|O14545|TRAD1_HUMAN TRAF-type zinc finger domain-containing protein 1 OS=Homo sapiens GN=TRAFD1 PE=1 SV=1	1	3	5.7	64.84	582	0	18.333	125240	111660	13582	0.486277	-1.63794	-2.12422	84
O75179	Ankyrin repeat domain-containing protein 17	ANKRD17	sp|O75179|ANR17_HUMAN Ankyrin repeat domain-containing protein 17 OS=Homo sapiens GN=ANKRD17 PE=1 SV=3	1	21	10.7	274.25	2603	0	159.34	694830	619470	75358	0.486134	0.833981	0.347847	168
P35232	Prohibitin	PHB	sp|P35232|PHB_HUMAN Prohibitin OS=Homo sapiens GN=PHB PE=1 SV=1	1	5	20.2	29.804	272	0	34.124	740700	660070	80634	0.480091	0.925566	0.445475	475
Q06210	Glutamine--fructose-6-phosphate aminotransferase [isomerizing] 1	GFPT1	sp|Q06210|GFPT1_HUMAN Glutamine--fructose-6-phosphate aminotransferase [isomerizing] 1 OS=Homo sapiens GN=GFPT1 PE=1 SV=3	1	3	5.2	78.806	699	0	17.939	198530	176920	21613	0.480058	-0.973957	-1.45401	752
Q9Y295	Developmentally-regulated GTP-binding protein 1	DRG1	sp|Q9Y295|DRG1_HUMAN Developmentally-regulated GTP-binding protein 1 OS=Homo sapiens GN=DRG1 PE=1 SV=1	1	2	6.8	40.542	367	0.0010152	13.351	142930	127280	15646	0.471071	-1.44905	-1.92012	1441
Q9UQ80;H0YIN7	Proliferation-associated protein 2G4	PA2G4	sp|Q9UQ80|PA2G4_HUMAN Proliferation-associated protein 2G4 OS=Homo sapiens GN=PA2G4 PE=1 SV=3	2	5	16.2	43.786	394	0	78.63	925200	823650	101550	0.466774	1.24498	0.778204	1431
Q3V6T2	Girdin	CCDC88A	sp|Q3V6T2|GRDN_HUMAN Girdin OS=Homo sapiens GN=CCDC88A PE=1 SV=2	1	8	5.2	216.04	1871	0	46.821	71301	63467	7834	0.465117	-2.45298	-2.91809	914
Q9NRN7	L-aminoadipate-semialdehyde dehydrogenase-phosphopantetheinyl transferase	AASDHPPT	sp|Q9NRN7|ADPPT_HUMAN L-aminoadipate-semialdehyde dehydrogenase-phosphopantetheinyl transferase OS=Homo sapiens GN=AASDHPPT PE=1 SV=2	1	3	11.3	35.776	309	0	17.704	265180	235950	29237	0.459546	-0.558573	-1.01812	1321
Q14839;Q8TDI0	Chromodomain-helicase-DNA-binding protein 4;Chromodomain-helicase-DNA-binding protein 5	CHD4;CHD5	sp|Q14839|CHD4_HUMAN Chromodomain-helicase-DNA-binding protein 4 OS=Homo sapiens GN=CHD4 PE=1 SV=2;sp|Q8TDI0|CHD5_HUMAN Chromodomain-helicase-DNA-binding protein 5 OS=Homo sapiens GN=CHD5 PE=1 SV=1	2	4	2.7	218	1912	0	24.596	56718	50434	6283.8	0.45162	-2.78458	-3.23621	853
Q9BQA1	Methylosome protein 50	WDR77	sp|Q9BQA1|MEP50_HUMAN Methylosome protein 50 OS=Homo sapiens GN=WDR77 PE=1 SV=1	1	3	15.8	36.724	342	0	21.687	709190	630570	78619	0.450638	0.859602	0.408964	1212
P13639	Elongation factor 2	EEF2	sp|P13639|EF2_HUMAN Elongation factor 2 OS=Homo sapiens GN=EEF2 PE=1 SV=4	1	38	49.1	95.337	858	0	323.31	17362000	15435000	1926900	0.448784	5.47301	5.02422	341
P05388;Q8NHW5	60S acidic ribosomal protein P0;60S acidic ribosomal protein P0-like	RPLP0;RPLP0P6	sp|P05388|RLA0_HUMAN 60S acidic ribosomal protein P0 OS=Homo sapiens GN=RPLP0 PE=1 SV=1;sp|Q8NHW5|RLA0L_HUMAN 60S acidic ribosomal protein P0-like OS=Homo sapiens GN=RPLP0P6 PE=5 SV=1	2	10	43.8	34.273	317	0	259.93	13419000	11916000	1503200	0.433723	5.0997	4.66598	275
P27635;Q96L21	60S ribosomal protein L10	RPL10	sp|P27635|RL10_HUMAN 60S ribosomal protein L10 OS=Homo sapiens GN=RPL10 PE=1 SV=4	2	4	15.9	24.604	214	0	35.421	4412300	3916600	495740	0.428879	3.49448	3.0656	432
O43390	Heterogeneous nuclear ribonucleoprotein R	HNRNPR	sp|O43390|HNRPR_HUMAN Heterogeneous nuclear ribonucleoprotein R OS=Homo sapiens GN=HNRNPR PE=1 SV=1	1	2	3.9	70.942	633	0.0010215	13.582	162890	144520	18369	0.422855	-1.26579	-1.68864	126
Q2TAL8	Glutamine-rich protein 1	QRICH1	sp|Q2TAL8|QRIC1_HUMAN Glutamine-rich protein 1 OS=Homo sapiens GN=QRICH1 PE=1 SV=1	1	1	1.4	86.435	776	0.0083449	5.9943	92425	81973	10451	0.418439	-2.08383	-2.50227	910
Q99961;Q99962	Endophilin-A2;Endophilin-A1	SH3GL1;SH3GL2	sp|Q99961|SH3G1_HUMAN Endophilin-A2 OS=Homo sapiens GN=SH3GL1 PE=1 SV=1;sp|Q99962|SH3G2_HUMAN Endophilin-A1 OS=Homo sapiens GN=SH3GL2 PE=1 SV=1	2	2	5.4	41.489	368	0.001006	13.149	8348800	7393700	955040	0.399595	4.41117	4.01158	1208
Q9NR31;Q9Y6B6	GTP-binding protein SAR1a;GTP-binding protein SAR1b	SAR1A;SAR1B	sp|Q9NR31|SAR1A_HUMAN GTP-binding protein SAR1a OS=Homo sapiens GN=SAR1A PE=1 SV=1;sp|Q9Y6B6|SAR1B_HUMAN GTP-binding protein SAR1b OS=Homo sapiens GN=SAR1B PE=1 SV=1	2	2	11.6	22.367	198	0.0010225	13.584	1243600	1100800	142880	0.392609	1.66343	1.27082	1318
P68104;Q5VTE0;Q05639	Elongation factor 1-alpha 1;Putative elongation factor 1-alpha-like 3	EEF1A1;EEF1A1P5	sp|P68104|EF1A1_HUMAN Elongation factor 1-alpha 1 OS=Homo sapiens GN=EEF1A1 PE=1 SV=1;sp|Q5VTE0|EF1A3_HUMAN Putative elongation factor 1-alpha-like 3 OS=Homo sapiens GN=EEF1A1P5 PE=5 SV=1	3	21	56.7	50.14	462	0	323.31	135090000	119360000	15733000	0.370386	8.42405	8.05366	707
Q13257	Mitotic spindle assembly checkpoint protein MAD2A	MAD2L1	sp|Q13257|MD2L1_HUMAN Mitotic spindle assembly checkpoint protein MAD2A OS=Homo sapiens GN=MAD2L1 PE=1 SV=1	1	5	20	23.51	205	0	39.726	3516600	3103700	412910	0.357021	3.15886	2.80184	796
P07197;Q16352	Neurofilament medium polypeptide	NEFM	sp|P07197|NFM_HUMAN Neurofilament medium polypeptide OS=Homo sapiens GN=NEFM PE=1 SV=3	2	40	44.3	102.47	916	0	323.31	29167000	25742000	3425400	0.35671	6.21093	5.85422	287
O60271;Q9UPT6	C-Jun-amino-terminal kinase-interacting protein 4	SPAG9	sp|O60271|JIP4_HUMAN C-Jun-amino-terminal kinase-interacting protein 4 OS=Homo sapiens GN=SPAG9 PE=1 SV=4	2	4	3.4	146.2	1321	0	22.583	123910	109360	14555	0.35643	-1.66797	-2.0244	147
P19387	DNA-directed RNA polymerase II subunit RPB3	POLR2C	sp|P19387|RPB3_HUMAN DNA-directed RNA polymerase II subunit RPB3 OS=Homo sapiens GN=POLR2C PE=1 SV=2	1	2	6.9	31.441	275	0.00099404	12.856	424380	374350	50036	0.350282	0.107334	-0.242948	379
Q6Y7W6	PERQ amino acid-rich with GYF domain-containing protein 2	GIGYF2	sp|Q6Y7W6|PERQ2_HUMAN PERQ amino acid-rich with GYF domain-containing protein 2 OS=Homo sapiens GN=GIGYF2 PE=1 SV=1	1	6	6.6	150.07	1299	0	57.461	328850	290070	38780	0.349949	-0.260653	-0.610601	981
P26641	Elongation factor 1-gamma	EEF1G	sp|P26641|EF1G_HUMAN Elongation factor 1-gamma OS=Homo sapiens GN=EEF1G PE=1 SV=3	1	8	21.3	50.118	437	0	127.42	3637500	3205200	432300	0.33724	3.20529	2.86805	430
P51532;P51531	Transcription activator BRG1	SMARCA4	sp|P51532|SMCA4_HUMAN Transcription activator BRG1 OS=Homo sapiens GN=SMARCA4 PE=1 SV=2	2	5	4.1	184.64	1647	0	28.714	111010	97805	13201	0.336194	-1.82907	-2.16527	579
P20618	Proteasome subunit beta type-1	PSMB1	sp|P20618|PSB1_HUMAN Proteasome subunit beta type-1 OS=Homo sapiens GN=PSMB1 PE=1 SV=2	1	9	46.9	26.489	241	0	189.59	7289000	6420800	868180	0.333618	4.20763	3.87401	386
A0A087WZG4;Q6ZSZ5	Rho guanine nucleotide exchange factor 18	ARHGEF18	tr|A0A087WZG4|A0A087WZG4_HUMAN Uncharacterized protein (Fragment) OS=Homo sapiens PE=4 SV=2;sp|Q6ZSZ5|ARHGI_HUMAN Rho guanine nucleotide exchange factor 18 OS=Homo sapiens GN=ARHGEF18 PE=1 SV=3	2	1	1	126.1	1122	0.0029412	6.3741	22824	20093	2730.9	0.326176	-4.11229	-4.43847	2
O95433	Activator of 90 kDa heat shock protein ATPase homolog 1	AHSA1	sp|O95433|AHSA1_HUMAN Activator of 90 kDa heat shock protein ATPase homolog 1 OS=Homo sapiens GN=AHSA1 PE=1 SV=1	1	6	27.5	38.274	338	0	79.316	1213200	1067400	145780	0.319168	1.61897	1.29981	221
Q14157	Ubiquitin-associated protein 2-like	UBAP2L	sp|Q14157|UBP2L_HUMAN Ubiquitin-associated protein 2-like OS=Homo sapiens GN=UBAP2L PE=1 SV=2	1	6	7.2	114.53	1087	0	111.22	1220800	1073800	146950	0.316259	1.6276	1.31134	827
P63173	60S ribosomal protein L38	RPL38	sp|P63173|RL38_HUMAN 60S ribosomal protein L38 OS=Homo sapiens GN=RPL38 PE=1 SV=2	1	5	50	8.2178	70	0	152.21	36720000	32299000	4421300	0.31588	6.53829	6.22241	700
P55735	Protein SEC13 homolog	SEC13	sp|P55735|SEC13_HUMAN Protein SEC13 homolog OS=Homo sapiens GN=SEC13 PE=1 SV=3	1	2	11.5	35.54	322	0.00096525	12.18	328100	288380	39719	0.307001	-0.269083	-0.576084	621
Q9BVG4	Protein PBDC1	PBDC1	sp|Q9BVG4|PBDC1_HUMAN Protein PBDC1 OS=Homo sapiens GN=PBDC1 PE=1 SV=1	1	2	11.2	26.056	233	0.00088028	11.241	491920	432260	59657	0.304069	0.314846	0.0107775	1237
P63162;P14678	Small nuclear ribonucleoprotein-associated protein N;Small nuclear ribonucleoprotein-associated proteins B and B	SNRPN;SNRPB	sp|P63162|RSMN_HUMAN Small nuclear ribonucleoprotein-associated protein N OS=Homo sapiens GN=SNRPN PE=1 SV=1;sp|P14678|RSMB_HUMAN Small nuclear ribonucleoprotein-associated proteins B and B OS=Homo sapiens GN=SNRPB PE=1 SV=2	2	3	12.5	24.614	240	0	19.714	1724200	1515000	209130	0.303778	2.12419	1.82041	352
Q00653	Nuclear factor NF-kappa-B p100 subunit;Nuclear factor NF-kappa-B p52 subunit	NFKB2	sp|Q00653|NFKB2_HUMAN Nuclear factor NF-kappa-B p100 subunit OS=Homo sapiens GN=NFKB2 PE=1 SV=4	1	1	1.3	96.748	900	0.0015649	7.2016	13924	12216	1708.1	0.28524	-4.83021	-5.11545	730
P36957	Dihydrolipoyllysine-residue succinyltransferase component of 2-oxoglutarate dehydrogenase complex, mitochondrial	DLST	sp|P36957|ODO2_HUMAN Dihydrolipoyllysine-residue succinyltransferase component of 2-oxoglutarate dehydrogenase complex, mitochondrial OS=Homo sapiens GN=DLST PE=1 SV=4	1	3	8.6	48.755	453	0	29.537	134130	117630	16500	0.28065	-1.5628	-1.84345	490
P49674;P48730	Casein kinase I isoform epsilon;Casein kinase I isoform delta	CSNK1E;CSNK1D	sp|P49674|KC1E_HUMAN Casein kinase I isoform epsilon OS=Homo sapiens GN=CSNK1E PE=1 SV=1;sp|P48730|KC1D_HUMAN Casein kinase I isoform delta OS=Homo sapiens GN=CSNK1D PE=1 SV=2	2	5	15.6	47.315	416	0	29.707	266510	233570	32946	0.272613	-0.573198	-0.845811	561
P06576	ATP synthase subunit beta, mitochondrial	ATP5B	sp|P06576|ATPB_HUMAN ATP synthase subunit beta, mitochondrial OS=Homo sapiens GN=ATP5B PE=1 SV=3	1	16	39.3	56.559	529	0	140.45	3330100	2915500	414610	0.260847	3.06862	2.80777	279
Q96N67;Q8NF50	Dedicator of cytokinesis protein 7	DOCK7	sp|Q96N67|DOCK7_HUMAN Dedicator of cytokinesis protein 7 OS=Homo sapiens GN=DOCK7 PE=1 SV=4	2	4	2.6	242.56	2140	0	22.698	58983	51630	7353.4	0.258658	-2.75077	-3.00943	1172
P83731	60S ribosomal protein L24	RPL24	sp|P83731|RL24_HUMAN 60S ribosomal protein L24 OS=Homo sapiens GN=RPL24 PE=1 SV=1	1	3	19.1	17.779	157	0	32.998	4614100	4038600	575490	0.257923	3.53873	3.28081	720
P07900;Q14568;Q58FG0;Q58FG1	Heat shock protein HSP 90-alpha	HSP90AA1	sp|P07900|HS90A_HUMAN Heat shock protein HSP 90-alpha OS=Homo sapiens GN=HSP90AA1 PE=1 SV=5	4	31	34.3	84.659	732	0	323.31	14342000	12549000	1792300	0.254622	5.17438	4.91975	294
P42694	Probable helicase with zinc finger domain	HELZ	sp|P42694|HELZ_HUMAN Probable helicase with zinc finger domain OS=Homo sapiens GN=HELZ PE=1 SV=2	1	1	0.7	218.97	1942	0.00095602	12.045	13371	11690	1681	0.244815	-4.89371	-5.13852	516
Q01433	AMP deaminase 2	AMPD2	sp|Q01433|AMPD2_HUMAN AMP deaminase 2 OS=Homo sapiens GN=AMPD2 PE=1 SV=2	1	1	1.4	100.69	879	0.0022438	6.5039	33069	28898	4170.2	0.239713	-3.58801	-3.82773	734
P43243	Matrin-3	MATR3	sp|P43243|MATR3_HUMAN Matrin-3 OS=Homo sapiens GN=MATR3 PE=1 SV=2	1	8	11.3	94.622	847	0	49.809	750350	655050	95302	0.227959	0.914551	0.686592	522
Q08211	ATP-dependent RNA helicase A	DHX9	sp|Q08211|DHX9_HUMAN ATP-dependent RNA helicase A OS=Homo sapiens GN=DHX9 PE=1 SV=4	1	23	20.5	140.96	1270	0	268.38	2187700	1908800	278840	0.222088	2.45754	2.23545	763
Q02878	60S ribosomal protein L6	RPL6	sp|Q02878|RL6_HUMAN 60S ribosomal protein L6 OS=Homo sapiens GN=RPL6 PE=1 SV=3	1	6	23.6	32.728	288	0	47.13	1711100	1491400	219670	0.21019	2.10154	1.89135	743
Q9H270	Vacuolar protein sorting-associated protein 11 homolog	VPS11	sp|Q9H270|VPS11_HUMAN Vacuolar protein sorting-associated protein 11 homolog OS=Homo sapiens GN=VPS11 PE=1 SV=1	1	2	2.4	107.84	941	0.0016611	10.656	33680	29338	4342	0.203271	-3.56621	-3.76948	1268
Q5SW79;Q96L14	Centrosomal protein of 170 kDa	CEP170	sp|Q5SW79|CE170_HUMAN Centrosomal protein of 170 kDa OS=Homo sapiens GN=CEP170 PE=1 SV=1	2	12	10.7	175.29	1584	0	90.124	399570	347920	51651	0.198819	0.00170135	-0.197118	931
Q92890	Ubiquitin fusion degradation protein 1 homolog	UFD1L	sp|Q92890|UFD1_HUMAN Ubiquitin fusion degradation protein 1 homolog OS=Homo sapiens GN=UFD1L PE=1 SV=3	1	3	16	34.5	307	0	23.408	455150	396110	59037	0.193141	0.188847	-0.0042944	1132
Q15436	Protein transport protein Sec23A	SEC23A	sp|Q15436|SC23A_HUMAN Protein transport protein Sec23A OS=Homo sapiens GN=SEC23A PE=1 SV=2	1	5	8.4	86.16	765	0	30.419	218890	190460	28433	0.190783	-0.867565	-1.05835	885
Q9GZP4	PITH domain-containing protein 1	PITHD1	sp|Q9GZP4|PITH1_HUMAN PITH domain-containing protein 1 OS=Homo sapiens GN=PITHD1 PE=1 SV=1	1	4	23.2	24.178	211	0	25.901	708230	616050	92183	0.187407	0.825993	0.638586	1259
P35611	Alpha-adducin	ADD1	sp|P35611|ADDA_HUMAN Alpha-adducin OS=Homo sapiens GN=ADD1 PE=1 SV=2	1	1	1.6	80.954	737	0.001554	7.0673	60537	52654	7883.6	0.186548	-2.72244	-2.90899	482
Q9C0D5	Protein TANC1	TANC1	sp|Q9C0D5|TANC1_HUMAN Protein TANC1 OS=Homo sapiens GN=TANC1 PE=1 SV=3	1	2	1.5	202.22	1861	0.0016681	10.729	7365.9	6406	959.85	0.185475	-5.76149	-5.94696	1258
P25205	DNA replication licensing factor MCM3	MCM3	sp|P25205|MCM3_HUMAN DNA replication licensing factor MCM3 OS=Homo sapiens GN=MCM3 PE=1 SV=3	1	19	27.7	90.98	808	0	179.75	2197600	1909300	288300	0.174334	2.45792	2.28358	415
P22694;P17612	cAMP-dependent protein kinase catalytic subunit beta;cAMP-dependent protein kinase catalytic subunit alpha	PRKACB;PRKACA	sp|P22694|KAPCB_HUMAN cAMP-dependent protein kinase catalytic subunit beta OS=Homo sapiens GN=PRKACB PE=1 SV=2;sp|P17612|KAPCA_HUMAN cAMP-dependent protein kinase catalytic subunit alpha OS=Homo sapiens GN=PRKACA PE=1 SV=2	2	2	6.6	40.622	351	0.00092593	11.747	207420	180190	27226	0.173394	-0.947535	-1.12093	367
Q6NVV1;P40429	Putative 60S ribosomal protein L13a protein RPL13AP3;60S ribosomal protein L13a	RPL13AP3;RPL13A	sp|Q6NVV1|R13P3_HUMAN Putative 60S ribosomal protein L13a protein RPL13AP3 OS=Homo sapiens GN=RPL13AP3 PE=5 SV=1;sp|P40429|RL13A_HUMAN 60S ribosomal protein L13a OS=Homo sapiens GN=RPL13A PE=1 SV=2	2	2	18.6	12.134	102	0.0010309	14.046	2190100	1901100	288970	0.164774	2.45171	2.28693	501
P62906	60S ribosomal protein L10a	RPL10A	sp|P62906|RL10A_HUMAN 60S ribosomal protein L10a OS=Homo sapiens GN=RPL10A PE=1 SV=2	1	5	27.2	24.831	217	0	33.745	3653000	3170900	482150	0.16427	3.18977	3.0255	693
Q14677	Clathrin interactor 1	CLINT1	sp|Q14677|EPN4_HUMAN Clathrin interactor 1 OS=Homo sapiens GN=CLINT1 PE=1 SV=1	1	5	10.4	68.259	625	0	31.299	731550	634720	96824	0.159615	0.869066	0.709452	847
Q08379	Golgin subfamily A member 2	GOLGA2	sp|Q08379|GOGA2_HUMAN Golgin subfamily A member 2 OS=Homo sapiens GN=GOLGA2 PE=1 SV=3	1	3	3.5	113.08	1002	0	20.702	134790	116930	17860	0.157773	-1.57141	-1.72918	764
P62826	GTP-binding nuclear protein Ran	RAN	sp|P62826|RAN_HUMAN GTP-binding nuclear protein Ran OS=Homo sapiens GN=RAN PE=1 SV=3	1	6	34.7	24.423	216	0	41.106	2567600	2224300	343280	0.142826	2.67823	2.5354	683
O00170	AH receptor-interacting protein	AIP	sp|O00170|AIP_HUMAN AH receptor-interacting protein OS=Homo sapiens GN=AIP PE=1 SV=2	1	3	11.8	37.636	330	0	19.87	863340	747860	115480	0.142057	1.10571	0.963657	70
P45880	Voltage-dependent anion-selective channel protein 2	VDAC2	sp|P45880|VDAC2_HUMAN Voltage-dependent anion-selective channel protein 2 OS=Homo sapiens GN=VDAC2 PE=1 SV=2	1	4	18.7	31.566	294	0	27.016	1410300	1221200	189020	0.13862	1.81317	1.67455	527
O43491	Band 4.1-like protein 2	EPB41L2	sp|O43491|E41L2_HUMAN Band 4.1-like protein 2 OS=Homo sapiens GN=EPB41L2 PE=1 SV=1	1	3	3.4	112.59	1005	0	18.471	90511	78346	12165	0.134055	-2.14912	-2.28318	128
O75175	CCR4-NOT transcription complex subunit 3	CNOT3	sp|O75175|CNOT3_HUMAN CCR4-NOT transcription complex subunit 3 OS=Homo sapiens GN=CNOT3 PE=1 SV=1	1	1	1.6	81.871	753	0.0016013	7.686	28957	25046	3910.7	0.126013	-3.7944	-3.92041	167
P10599	Thioredoxin	TXN	sp|P10599|THIO_HUMAN Thioredoxin OS=Homo sapiens GN=TXN PE=1 SV=3	1	4	42.9	11.737	105	0	41.501	4383400	3790600	592790	0.123764	3.4473	3.32354	317
P25788	Proteasome subunit alpha type-3	PSMA3	sp|P25788|PSA3_HUMAN Proteasome subunit alpha type-3 OS=Homo sapiens GN=PSMA3 PE=1 SV=2	1	3	12.2	28.433	255	0	24.99	522680	451990	70690	0.123644	0.379236	0.255592	423
Q08J23	tRNA (cytosine(34)-C(5))-methyltransferase	NSUN2	sp|Q08J23|NSUN2_HUMAN tRNA (cytosine(34)-C(5))-methyltransferase OS=Homo sapiens GN=NSUN2 PE=1 SV=2	1	3	4.3	86.47	767	0	37.922	121580	105130	16450	0.122946	-1.72488	-1.84783	768
Q92945	Far upstream element-binding protein 2	KHSRP	sp|Q92945|FUBP2_HUMAN Far upstream element-binding protein 2 OS=Homo sapiens GN=KHSRP PE=1 SV=4	1	13	23.8	73.114	711	0	119.67	3237600	2798500	439150	0.118799	3.00953	2.89073	1135
P62829	60S ribosomal protein L23	RPL23	sp|P62829|RL23_HUMAN 60S ribosomal protein L23 OS=Homo sapiens GN=RPL23 PE=1 SV=1	1	6	45.7	14.865	140	0	163.81	32658000	28222000	4436400	0.116291	6.34362	6.22733	684
Q9H0A8	COMM domain-containing protein 4	COMMD4	sp|Q9H0A8|COMD4_HUMAN COMM domain-containing protein 4 OS=Homo sapiens GN=COMMD4 PE=1 SV=1	1	5	38.2	21.764	199	0	188.27	3053400	2638100	415230	0.114449	2.92437	2.80993	1264
P61326;Q96A72	Protein mago nashi homolog;Protein mago nashi homolog 2	MAGOH;MAGOHB	sp|P61326|MGN_HUMAN Protein mago nashi homolog OS=Homo sapiens GN=MAGOH PE=1 SV=1;sp|Q96A72|MGN2_HUMAN Protein mago nashi homolog 2 OS=Homo sapiens GN=MAGOHB PE=1 SV=1	2	3	25.3	17.163	146	0	17.889	630780	544960	85823	0.113646	0.649096	0.53545	649
P18583	Protein SON	SON	sp|P18583|SON_HUMAN Protein SON OS=Homo sapiens GN=SON PE=1 SV=4	1	4	2.5	263.83	2426	0	22.427	60023	51831	8192.1	0.108442	-2.74517	-2.85361	375
P16152;O75828	Carbonyl reductase [NADPH] 1	CBR1	sp|P16152|CBR1_HUMAN Carbonyl reductase [NADPH] 1 OS=Homo sapiens GN=CBR1 PE=1 SV=3	2	5	23.5	30.375	277	0	78.549	658010	568170	89834	0.107922	0.709269	0.601347	361
P62244;H3BN98	40S ribosomal protein S15a	RPS15A	sp|P62244|RS15A_HUMAN 40S ribosomal protein S15a OS=Homo sapiens GN=RPS15A PE=1 SV=2;tr|H3BN98|H3BN98_HUMAN Uncharacterized protein (Fragment) OS=Homo sapiens PE=4 SV=2	2	4	30.8	14.839	130	0	38.177	2241500	1935400	306180	0.107113	2.47751	2.37039	664
Q92600	Cell differentiation protein RCD1 homolog	RQCD1	sp|Q92600|RCD1_HUMAN Cell differentiation protein RCD1 homolog OS=Homo sapiens GN=RQCD1 PE=1 SV=1	1	3	10.7	33.631	299	0	22.701	377970	325930	52041	0.0937738	-0.0924911	-0.186265	1123
P15927	Replication protein A 32 kDa subunit	RPA2	sp|P15927|RFA2_HUMAN Replication protein A 32 kDa subunit OS=Homo sapiens GN=RPA2 PE=1 SV=1	1	3	15.6	29.247	270	0	19.877	1822400	1571400	250990	0.0932789	2.17692	2.08364	360
O95248	Myotubularin-related protein 5	SBF1	sp|O95248|MTMR5_HUMAN Myotubularin-related protein 5 OS=Homo sapiens GN=SBF1 PE=1 SV=3	1	2	1.4	208.31	1867	0.00086356	11.09	11083	9549	1534.4	0.0846071	-5.18556	-5.27017	214
P54886	Delta-1-pyrroline-5-carboxylate synthase;Glutamate 5-kinase;Gamma-glutamyl phosphate reductase	ALDH18A1	sp|P54886|P5CS_HUMAN Delta-1-pyrroline-5-carboxylate synthase OS=Homo sapiens GN=ALDH18A1 PE=1 SV=2	1	6	8.3	87.301	795	0	41.142	371110	319640	51472	0.081521	-0.120605	-0.202127	615
Q02413	Desmoglein-1	DSG1	sp|Q02413|DSG1_HUMAN Desmoglein-1 OS=Homo sapiens GN=DSG1 PE=1 SV=2	1	14	18.8	113.75	1049	0	137.47	3015700	2596700	419030	0.0784855	2.90155	2.82307	740
Q9Y2A7	Nck-associated protein 1	NCKAP1	sp|Q9Y2A7|NCKP1_HUMAN Nck-associated protein 1 OS=Homo sapiens GN=NCKAP1 PE=1 SV=1	1	2	2.4	128.79	1128	0.00096154	12.129	75669	65065	10604	0.0642052	-2.4171	-2.48131	1442
P38919	Eukaryotic initiation factor 4A-III;Eukaryotic initiation factor 4A-III, N-terminally processed	EIF4A3	sp|P38919|IF4A3_HUMAN Eukaryotic initiation factor 4A-III OS=Homo sapiens GN=EIF4A3 PE=1 SV=4	1	7	20.4	46.871	411	0	36.929	479030	411670	67355	0.0585632	0.244434	0.185871	495
Q8NEB9	Phosphatidylinositol 3-kinase catalytic subunit type 3	PIK3C3	sp|Q8NEB9|PK3C3_HUMAN Phosphatidylinositol 3-kinase catalytic subunit type 3 OS=Homo sapiens GN=PIK3C3 PE=1 SV=1	1	2	3	101.55	887	0.00097466	12.404	62112	53355	8756.9	0.0540628	-2.70336	-2.75742	1073
O95782	AP-2 complex subunit alpha-1	AP2A1	sp|O95782|AP2A1_HUMAN AP-2 complex subunit alpha-1 OS=Homo sapiens GN=AP2A1 PE=1 SV=3	1	7	8.5	107.54	977	0	41.955	262580	225300	37283	0.0421896	-0.625206	-0.667396	229
P08238;Q58FF7;Q58FF6	Heat shock protein HSP 90-beta	HSP90AB1	sp|P08238|HS90B_HUMAN Heat shock protein HSP 90-beta OS=Homo sapiens GN=HSP90AB1 PE=1 SV=4	3	33	38.8	83.263	724	0	323.31	33535000	28760000	4775500	0.0372734	6.37087	6.33359	297
Q8IZP2;P50502;Q8NFI4	Putative protein FAM10A4;Hsc70-interacting protein;Putative protein FAM10A5	ST13P4;ST13;ST13P5	sp|Q8IZP2|ST134_HUMAN Putative protein FAM10A4 OS=Homo sapiens GN=ST13P4 PE=5 SV=1;sp|P50502|F10A1_HUMAN Hsc70-interacting protein OS=Homo sapiens GN=ST13 PE=1 SV=2;sp|Q8NFI4|F10A5_HUMAN Putative protein FAM10A5 OS=Homo sapiens GN=ST13P5 PE=5 SV=1	3	3	15.4	27.406	240	0	18.126	984780	844480	140300	0.0364799	1.28101	1.24453	570
Q14315	Filamin-C	FLNC	sp|Q14315|FLNC_HUMAN Filamin-C OS=Homo sapiens GN=FLNC PE=1 SV=3	1	10	5.1	291.02	2725	0	39.3	44686	38230	6455.6	0.0130138	-3.18428	-3.19729	836
Q9BUJ2	Heterogeneous nuclear ribonucleoprotein U-like protein 1	HNRNPUL1	sp|Q9BUJ2|HNRL1_HUMAN Heterogeneous nuclear ribonucleoprotein U-like protein 1 OS=Homo sapiens GN=HNRNPUL1 PE=1 SV=2	1	3	4.9	95.737	856	0	23.438	207680	177600	30080	0.00868702	-0.968422	-0.977109	1232
Q8WWK9	Cytoskeleton-associated protein 2	CKAP2	sp|Q8WWK9|CKAP2_HUMAN Cytoskeleton-associated protein 2 OS=Homo sapiens GN=CKAP2 PE=1 SV=1	1	2	4.4	76.986	683	0.00091827	11.635	80320	68625	11695	-0.000226021	-2.34025	-2.34002	1111
Q92900	Regulator of nonsense transcripts 1	UPF1	sp|Q92900|RENT1_HUMAN Regulator of nonsense transcripts 1 OS=Homo sapiens GN=UPF1 PE=1 SV=2	1	32	31.5	124.34	1129	0	323.31	3631900	3098900	533000	-0.0135193	3.15663	3.17015	1133
P11274	Breakpoint cluster region protein	BCR	sp|P11274|BCR_HUMAN Breakpoint cluster region protein OS=Homo sapiens GN=BCR PE=1 SV=2	1	2	2.4	142.82	1271	0.0017007	10.966	31087	26525	4562.5	-0.0136118	-3.71163	-3.69802	325
P15104	Glutamine synthetase	GLUL	sp|P15104|GLNA_HUMAN Glutamine synthetase OS=Homo sapiens GN=GLUL PE=1 SV=4	1	1	2.7	42.064	373	0.0022693	6.6299	203490	173470	30021	-0.0224257	-1.00237	-0.979941	356
Q8NFH3	Nucleoporin Nup43	NUP43	sp|Q8NFH3|NUP43_HUMAN Nucleoporin Nup43 OS=Homo sapiens GN=NUP43 PE=1 SV=1	1	3	11.1	42.15	380	0	19.396	943000	803710	139290	-0.0244846	1.20962	1.23411	1077
P19338	Nucleolin	NCL	sp|P19338|NUCL_HUMAN Nucleolin OS=Homo sapiens GN=NCL PE=1 SV=3	1	16	23.5	76.613	710	0	196.82	4325400	3685000	640350	-0.0283375	3.40654	3.43488	377
Q9P258	Protein RCC2	RCC2	sp|Q9P258|RCC2_HUMAN Protein RCC2 OS=Homo sapiens GN=RCC2 PE=1 SV=2	1	12	30.8	56.084	522	0	93.615	1694000	1442300	251680	-0.034359	2.05325	2.0876	1360
Q96EY5	Multivesicular body subunit 12A	MVB12A	sp|Q96EY5|MB12A_HUMAN Multivesicular body subunit 12A OS=Homo sapiens GN=MVB12A PE=1 SV=1	1	2	11	28.783	273	0	22.517	609720	518670	91044	-0.0428867	0.577763	0.620649	1159
P28070	Proteasome subunit beta type-4	PSMB4	sp|P28070|PSB4_HUMAN Proteasome subunit beta type-4 OS=Homo sapiens GN=PSMB4 PE=1 SV=4	1	7	36.4	29.204	264	0	117.16	4612100	3919900	692250	-0.0516167	3.49569	3.54731	436
Q9UBK9	Protein UXT	UXT	sp|Q9UBK9|UXT_HUMAN Protein UXT OS=Homo sapiens GN=UXT PE=1 SV=1	1	2	15.3	18.246	157	0.0010331	14.3	1332300	1132100	200240	-0.0538673	1.70388	1.75774	1373
Q07820	Induced myeloid leukemia cell differentiation protein Mcl-1	MCL1	sp|Q07820|MCL1_HUMAN Induced myeloid leukemia cell differentiation protein Mcl-1 OS=Homo sapiens GN=MCL1 PE=1 SV=3	1	3	11.1	37.337	350	0	17.775	894480	759870	134600	-0.055994	1.1287	1.18469	760
Q10567	AP-1 complex subunit beta-1	AP1B1	sp|Q10567|AP1B1_HUMAN AP-1 complex subunit beta-1 OS=Homo sapiens GN=AP1B1 PE=1 SV=2	1	6	6.3	104.64	949	0	48.484	348130	295590	52537	-0.0608759	-0.233456	-0.17258	772
Q96A65	Exocyst complex component 4	EXOC4	sp|Q96A65|EXOC4_HUMAN Exocyst complex component 4 OS=Homo sapiens GN=EXOC4 PE=1 SV=1	1	2	2.7	110.5	974	0.0009434	11.86	44018	37323	6695.2	-0.0742025	-3.21892	-3.14471	1143
P50914	60S ribosomal protein L14	RPL14	sp|P50914|RL14_HUMAN 60S ribosomal protein L14 OS=Homo sapiens GN=RPL14 PE=1 SV=4	1	3	16.3	23.432	215	0	26.829	7892800	6688100	1204700	-0.0801468	4.26647	4.34662	574
P62258	14-3-3 protein epsilon	YWHAE	sp|P62258|1433E_HUMAN 14-3-3 protein epsilon OS=Homo sapiens GN=YWHAE PE=1 SV=1	1	13	54.1	29.174	255	0	167.79	7267200	6157200	1110000	-0.0813541	4.14715	4.2285	666
Q6UB35	Monofunctional C1-tetrahydrofolate synthase, mitochondrial	MTHFD1L	sp|Q6UB35|C1TM_HUMAN Monofunctional C1-tetrahydrofolate synthase, mitochondrial OS=Homo sapiens GN=MTHFD1L PE=1 SV=1	1	7	8.1	105.79	978	0	39.382	342660	290220	52433	-0.0844679	-0.259907	-0.175439	980
O60716	Catenin delta-1	CTNND1	sp|O60716|CTND1_HUMAN Catenin delta-1 OS=Homo sapiens GN=CTNND1 PE=1 SV=1	1	10	13	108.17	968	0	60.374	443320	375380	67939	-0.0870285	0.111298	0.198326	157
P07814	Bifunctional glutamate/proline--tRNA ligase;Glutamate--tRNA ligase;Proline--tRNA ligase	EPRS	sp|P07814|SYEP_HUMAN Bifunctional glutamate/proline--tRNA ligase OS=Homo sapiens GN=EPRS PE=1 SV=5	1	38	33	170.59	1512	0	323.31	2958000	2504100	453900	-0.089222	2.84917	2.93839	293
P52907	F-actin-capping protein subunit alpha-1	CAPZA1	sp|P52907|CAZA1_HUMAN F-actin-capping protein subunit alpha-1 OS=Homo sapiens GN=CAPZA1 PE=1 SV=3	1	8	43.7	32.922	286	0	323.31	7719500	6531800	1187700	-0.0937576	4.23236	4.32611	597
P51553	Isocitrate dehydrogenase [NAD] subunit gamma, mitochondrial	IDH3G	sp|P51553|IDH3G_HUMAN Isocitrate dehydrogenase [NAD] subunit gamma, mitochondrial OS=Homo sapiens GN=IDH3G PE=1 SV=1	1	1	2.5	42.794	393	0.0022607	6.5811	7900700	6683200	1217500	-0.0964508	4.26541	4.36186	580
Q14160	Protein scribble homolog	SCRIB	sp|Q14160|SCRIB_HUMAN Protein scribble homolog OS=Homo sapiens GN=SCRIB PE=1 SV=4	1	1	0.7	174.88	1630	0.0035971	6.2003	9763.7	8244.7	1519	-0.112722	-5.39744	-5.28472	828
P61221	ATP-binding cassette sub-family E member 1	ABCE1	sp|P61221|ABCE1_HUMAN ATP-binding cassette sub-family E member 1 OS=Homo sapiens GN=ABCE1 PE=1 SV=1	1	5	11.2	67.314	599	0	41.774	758070	639740	118330	-0.118399	0.880432	0.998831	647
P62280	40S ribosomal protein S11	RPS11	sp|P62280|RS11_HUMAN 40S ribosomal protein S11 OS=Homo sapiens GN=RPS11 PE=1 SV=3	1	8	50.6	18.431	158	0	50.686	4177500	3524900	652670	-0.119911	3.34246	3.46237	672
Q9Y4H2	Insulin receptor substrate 2	IRS2	sp|Q9Y4H2|IRS2_HUMAN Insulin receptor substrate 2 OS=Homo sapiens GN=IRS2 PE=1 SV=2	1	6	7.4	137.33	1338	0	33.721	131040	110550	20486	-0.121079	-1.65236	-1.53128	1463
P81605	Dermcidin;Survival-promoting peptide;DCD-1	DCD	sp|P81605|DCD_HUMAN Dermcidin OS=Homo sapiens GN=DCD PE=1 SV=2	1	9	47.3	11.284	110	0	243.49	259120000	218580000	40541000	-0.12236	9.29689	9.41925	719
P62241	40S ribosomal protein S8	RPS8	sp|P62241|RS8_HUMAN 40S ribosomal protein S8 OS=Homo sapiens GN=RPS8 PE=1 SV=2	1	8	45.7	24.205	208	0	190.58	4243300	3576200	667150	-0.130724	3.3633	3.49403	663
P62266	40S ribosomal protein S23	RPS23	sp|P62266|RS23_HUMAN 40S ribosomal protein S23 OS=Homo sapiens GN=RPS23 PE=1 SV=3	1	3	23.8	15.807	143	0	19.991	4621400	3892100	729330	-0.137163	3.48542	3.62259	668
O75616	GTPase Era, mitochondrial	ERAL1	sp|O75616|ERAL1_HUMAN GTPase Era, mitochondrial OS=Homo sapiens GN=ERAL1 PE=1 SV=2	1	4	11.2	48.349	437	0	25.912	526500	443210	83282	-0.141153	0.350937	0.49209	186
Q00839	Heterogeneous nuclear ribonucleoprotein U	HNRNPU	sp|Q00839|HNRPU_HUMAN Heterogeneous nuclear ribonucleoprotein U OS=Homo sapiens GN=HNRNPU PE=1 SV=6	1	11	13.6	90.583	825	0	125.05	1992200	1676800	315400	-0.142612	2.27058	2.4132	731
Q8WXI9;Q86YP4	Transcriptional repressor p66-beta;Transcriptional repressor p66-alpha	GATAD2B;GATAD2A	sp|Q8WXI9|P66B_HUMAN Transcriptional repressor p66-beta OS=Homo sapiens GN=GATAD2B PE=1 SV=1;sp|Q86YP4|P66A_HUMAN Transcriptional repressor p66-alpha OS=Homo sapiens GN=GATAD2A PE=1 SV=1	2	1	1.9	65.26	593	0.00099602	12.864	110720	93039	17679	-0.157269	-1.90115	-1.74388	1026
O14579	Coatomer subunit epsilon	COPE	sp|O14579|COPE_HUMAN Coatomer subunit epsilon OS=Homo sapiens GN=COPE PE=1 SV=3	1	2	10.4	34.482	308	0.0008547	11.011	173690	145750	27945	-0.170234	-1.25356	-1.08332	85
O14893	Gem-associated protein 2	GEMIN2	sp|O14893|GEMI2_HUMAN Gem-associated protein 2 OS=Homo sapiens GN=GEMIN2 PE=1 SV=1	1	2	6.8	31.585	280	0.00098232	12.524	470370	394210	76156	-0.181135	0.18191	0.363045	96
Q15185	Prostaglandin E synthase 3	PTGES3	sp|Q15185|TEBP_HUMAN Prostaglandin E synthase 3 OS=Homo sapiens GN=PTGES3 PE=1 SV=1	1	1	8.1	18.697	160	0.001576	7.3478	247410	207130	40281	-0.190702	-0.746517	-0.555815	872
P46821	Microtubule-associated protein 1B;MAP1B heavy chain;MAP1 light chain LC1	MAP1B	sp|P46821|MAP1B_HUMAN Microtubule-associated protein 1B OS=Homo sapiens GN=MAP1B PE=1 SV=2	1	1	0.5	270.63	2468	0.0022124	6.3894	8588.3	7188.7	1399.6	-0.192352	-5.59518	-5.40283	540
P31350	Ribonucleoside-diphosphate reductase subunit M2	RRM2	sp|P31350|RIR2_HUMAN Ribonucleoside-diphosphate reductase subunit M2 OS=Homo sapiens GN=RRM2 PE=1 SV=1	1	4	14.7	44.877	389	0	35.008	560580	469040	91542	-0.195862	0.432657	0.628519	455
Q9Y266	Nuclear migration protein nudC	NUDC	sp|Q9Y266|NUDC_HUMAN Nuclear migration protein nudC OS=Homo sapiens GN=NUDC PE=1 SV=1	1	6	21.5	38.242	331	0	37.084	484490	405250	79239	-0.19854	0.221758	0.420298	1438
O43808	Peroxisomal membrane protein PMP34	SLC25A17	sp|O43808|PM34_HUMAN Peroxisomal membrane protein PMP34 OS=Homo sapiens GN=SLC25A17 PE=1 SV=1	1	1	2.9	34.566	307	0.0070872	6.0648	129080	107950	21129	-0.200002	-1.68669	-1.48669	138
P40939	Trifunctional enzyme subunit alpha, mitochondrial;Long-chain enoyl-CoA hydratase;Long chain 3-hydroxyacyl-CoA dehydrogenase	HADHA	sp|P40939|ECHA_HUMAN Trifunctional enzyme subunit alpha, mitochondrial OS=Homo sapiens GN=HADHA PE=1 SV=2	1	10	14.8	82.999	763	0	83.247	728720	609200	119520	-0.203403	0.809862	1.01327	506
Q9P2E9;Q8N4C6	Ribosome-binding protein 1	RRBP1	sp|Q9P2E9|RRBP1_HUMAN Ribosome-binding protein 1 OS=Homo sapiens GN=RRBP1 PE=1 SV=4	2	4	3.4	152.47	1410	0	32.8	60907	50877	10030	-0.210377	-2.77197	-2.56159	1363
Q71RC2	La-related protein 4	LARP4	sp|Q71RC2|LARP4_HUMAN La-related protein 4 OS=Homo sapiens GN=LARP4 PE=1 SV=3	1	3	5.7	80.595	724	0	18.62	290010	242100	47908	-0.215803	-0.52145	-0.305647	987
Q13620	Cullin-4B	CUL4B	sp|Q13620|CUL4B_HUMAN Cullin-4B OS=Homo sapiens GN=CUL4B PE=1 SV=4	1	2	2.5	103.98	913	0.0016878	10.857	25194	21018	4175.4	-0.221429	-4.04736	-3.82593	811
P56192	Methionine--tRNA ligase, cytoplasmic	MARS	sp|P56192|SYMC_HUMAN Methionine--tRNA ligase, cytoplasmic OS=Homo sapiens GN=MARS PE=1 SV=2	1	17	21.8	101.11	900	0	261.99	4139300	3453000	686260	-0.222044	3.31273	3.53477	625
P34897	Serine hydroxymethyltransferase, mitochondrial	SHMT2	sp|P34897|GLYM_HUMAN Serine hydroxymethyltransferase, mitochondrial OS=Homo sapiens GN=SHMT2 PE=1 SV=3	1	5	13.3	55.992	504	0	28.778	328000	273580	54419	-0.223288	-0.345091	-0.121803	471
Q9BRX2	Protein pelota homolog	PELO	sp|Q9BRX2|PELO_HUMAN Protein pelota homolog OS=Homo sapiens GN=PELO PE=1 SV=2	1	3	8.6	43.359	385	0	21.753	308060	256570	51497	-0.236277	-0.437702	-0.201426	1220
P33992	DNA replication licensing factor MCM5	MCM5	sp|P33992|MCM5_HUMAN DNA replication licensing factor MCM5 OS=Homo sapiens GN=MCM5 PE=1 SV=5	1	10	18.8	82.285	734	0	62.155	1087200	904870	182360	-0.242146	1.38066	1.6228	468
O75534	Cold shock domain-containing protein E1	CSDE1	sp|O75534|CSDE1_HUMAN Cold shock domain-containing protein E1 OS=Homo sapiens GN=CSDE1 PE=1 SV=2	1	7	9.5	88.884	798	0	52.229	646920	538120	108800	-0.246819	0.630875	0.877693	185
Q96CW5	Gamma-tubulin complex component 3	TUBGCP3	sp|Q96CW5|GCP3_HUMAN Gamma-tubulin complex component 3 OS=Homo sapiens GN=TUBGCP3 PE=1 SV=2	1	4	4.6	103.57	907	0	24.033	97616	81164	16452	-0.250492	-2.09814	-1.84765	1152
P31947	14-3-3 protein sigma	SFN	sp|P31947|1433S_HUMAN 14-3-3 protein sigma OS=Homo sapiens GN=SFN PE=1 SV=1	1	5	20.6	27.774	248	0	20.548	1126200	935460	190710	-0.258774	1.42862	1.6874	461
P12268	Inosine-5-monophosphate dehydrogenase 2	IMPDH2	sp|P12268|IMDH2_HUMAN Inosine-5-monophosphate dehydrogenase 2 OS=Homo sapiens GN=IMPDH2 PE=1 SV=2	1	2	4.5	55.804	514	0.00090662	11.535	280220	232660	47564	-0.262787	-0.578831	-0.316044	336
P62263	40S ribosomal protein S14	RPS14	sp|P62263|RS14_HUMAN 40S ribosomal protein S14 OS=Homo sapiens GN=RPS14 PE=1 SV=3	1	5	37.7	16.273	151	0	53.819	13344000	11076000	2267700	-0.264933	4.99424	5.25917	667
O60841	Eukaryotic translation initiation factor 5B	EIF5B	sp|O60841|IF2P_HUMAN Eukaryotic translation initiation factor 5B OS=Homo sapiens GN=EIF5B PE=1 SV=4	1	10	12.7	138.83	1220	0	108.9	616660	511540	105120	-0.270258	0.557793	0.828051	161
P24534	Elongation factor 1-beta	EEF1B2	sp|P24534|EF1B_HUMAN Elongation factor 1-beta OS=Homo sapiens GN=EEF1B2 PE=1 SV=3	1	2	12.4	24.763	225	0	20.703	2470900	2049600	421290	-0.270611	2.56022	2.83083	412
C9J1V9;O43324	Eukaryotic translation elongation factor 1 epsilon-1	EEF1E1-BLOC1S5;EEF1E1	tr|C9J1V9|C9J1V9_HUMAN HCG2043275 OS=Homo sapiens GN=EEF1E1-BLOC1S5 PE=4 SV=2;sp|O43324|MCA3_HUMAN Eukaryotic translation elongation factor 1 epsilon-1 OS=Homo sapiens GN=EEF1E1 PE=1 SV=1	2	4	37.7	17.017	151	0	36.601	3321800	2755300	566500	-0.271008	2.98708	3.25809	20
P62136;P62140	Serine/threonine-protein phosphatase PP1-alpha catalytic subunit;Serine/threonine-protein phosphatase PP1-beta catalytic subunit	PPP1CA;PPP1CB	sp|P62136|PP1A_HUMAN Serine/threonine-protein phosphatase PP1-alpha catalytic subunit OS=Homo sapiens GN=PPP1CA PE=1 SV=1;sp|P62140|PP1B_HUMAN Serine/threonine-protein phosphatase PP1-beta catalytic subunit OS=Homo sapiens GN=PPP1CB PE=1 SV=3	2	7	29.7	37.512	330	0.0016949	10.933	152990	126680	26303	-0.285179	-1.45587	-1.17069	659
O75436	Vacuolar protein sorting-associated protein 26A	VPS26A	sp|O75436|VP26A_HUMAN Vacuolar protein sorting-associated protein 26A OS=Homo sapiens GN=VPS26A PE=1 SV=2	1	2	7.6	38.169	327	0.00098619	12.726	180410	148930	31478	-0.31085	-1.22242	-0.91157	179
O60216	Double-strand-break repair protein rad21 homolog	RAD21	sp|O60216|RAD21_HUMAN Double-strand-break repair protein rad21 homolog OS=Homo sapiens GN=RAD21 PE=1 SV=2	1	1	2.1	71.689	631	0.00095147	11.955	63326	52265	11061	-0.312705	-2.73314	-2.42043	144
P78344	Eukaryotic translation initiation factor 4 gamma 2	EIF4G2	sp|P78344|IF4G2_HUMAN Eukaryotic translation initiation factor 4 gamma 2 OS=Homo sapiens GN=EIF4G2 PE=1 SV=1	1	1	1.1	102.36	907	0.007741	6.0422	60812	50182	10630	-0.314039	-2.79181	-2.47777	715
P23396	40S ribosomal protein S3	RPS3	sp|P23396|RS3_HUMAN 40S ribosomal protein S3 OS=Homo sapiens GN=RPS3 PE=1 SV=2	1	17	68.3	26.688	243	0	323.31	33194000	27385000	5808100	-0.315821	6.30019	6.61601	407
Q13310;P0CB38	Polyadenylate-binding protein 4	PABPC4	sp|Q13310|PABP4_HUMAN Polyadenylate-binding protein 4 OS=Homo sapiens GN=PABPC4 PE=1 SV=1	2	14	26.1	70.782	644	0	66.99	1818800	1499900	318910	-0.319422	2.10974	2.42916	799
Q9P289;Q9Y6E0;O00506	Serine/threonine-protein kinase 26	STK26	sp|Q9P289|STK26_HUMAN Serine/threonine-protein kinase 26 OS=Homo sapiens GN=STK26 PE=1 SV=2	3	6	17.3	46.528	416	0	34.683	509920	420370	89550	-0.322172	0.274607	0.596779	1362
Q8TF72	Protein Shroom3	SHROOM3	sp|Q8TF72|SHRM3_HUMAN Protein Shroom3 OS=Homo sapiens GN=SHROOM3 PE=1 SV=2	1	1	0.5	216.85	1996	0.0015773	7.3665	3451500	2845300	606160	-0.322258	3.03345	3.35571	1102
Q15008	26S proteasome non-ATPase regulatory subunit 6	PSMD6	sp|Q15008|PSMD6_HUMAN 26S proteasome non-ATPase regulatory subunit 6 OS=Homo sapiens GN=PSMD6 PE=1 SV=1	1	18	43.2	45.531	389	0	282.9	4871900	4015700	856130	-0.323318	3.53053	3.85384	857
Q9UKV5	E3 ubiquitin-protein ligase AMFR	AMFR	sp|Q9UKV5|AMFR_HUMAN E3 ubiquitin-protein ligase AMFR OS=Homo sapiens GN=AMFR PE=1 SV=2	1	2	3.3	72.995	643	0.00098717	12.759	1443100	1184900	258190	-0.354807	1.76964	2.12445	1407
Q8NDV7;Q9HCJ0	Trinucleotide repeat-containing gene 6A protein	TNRC6A	sp|Q8NDV7|TNR6A_HUMAN Trinucleotide repeat-containing gene 6A protein OS=Homo sapiens GN=TNRC6A PE=1 SV=2	2	3	2.4	210.29	1962	0	16.824	59388	48701	10687	-0.364974	-2.83503	-2.47006	1072
P61160	Actin-related protein 2	ACTR2	sp|P61160|ARP2_HUMAN Actin-related protein 2 OS=Homo sapiens GN=ACTR2 PE=1 SV=1	1	5	16.8	44.76	394	0	40.207	736640	603430	133210	-0.373583	0.796133	1.16972	645
Q92769	Histone deacetylase 2	HDAC2	sp|Q92769|HDAC2_HUMAN Histone deacetylase 2 OS=Homo sapiens GN=HDAC2 PE=1 SV=2	1	8	20.3	55.364	488	0	90.025	2519300	2063100	456130	-0.375771	2.56969	2.94546	1128
Q8IXJ9	Putative Polycomb group protein ASXL1	ASXL1	sp|Q8IXJ9|ASXL1_HUMAN Putative Polycomb group protein ASXL1 OS=Homo sapiens GN=ASXL1 PE=1 SV=3	1	3	2.9	165.45	1541	0	18.094	21729	17788	3940.9	-0.37876	-4.28808	-3.90932	1043
P30050	60S ribosomal protein L12	RPL12	sp|P30050|RL12_HUMAN 60S ribosomal protein L12 OS=Homo sapiens GN=RPL12 PE=1 SV=1	1	4	35.8	17.818	165	0	112.83	4252800	3480900	771880	-0.380056	3.32434	3.70439	447
P35579;P35749;REV__Q9UKV3	Myosin-9	MYH9	sp|P35579|MYH9_HUMAN Myosin-9 OS=Homo sapiens GN=MYH9 PE=1 SV=4	3	39	23.2	226.53	1960	0	313.56	1427900	1168100	259750	-0.3841	1.74904	2.13314	479
P58340	Myeloid leukemia factor 1	MLF1	sp|P58340|MLF1_HUMAN Myeloid leukemia factor 1 OS=Homo sapiens GN=MLF1 PE=1 SV=1	1	3	15.7	30.627	268	0	20.844	814430	666000	148420	-0.38723	0.938469	1.3257	631
P33176;O60282;Q12840	Kinesin-1 heavy chain	KIF5B	sp|P33176|KINH_HUMAN Kinesin-1 heavy chain OS=Homo sapiens GN=KIF5B PE=1 SV=1	3	17	21.2	109.68	963	0	172.07	844660	690370	154290	-0.391342	0.990316	1.38166	464
P26373	60S ribosomal protein L13	RPL13	sp|P26373|RL13_HUMAN 60S ribosomal protein L13 OS=Homo sapiens GN=RPL13 PE=1 SV=4	1	4	19.9	24.261	211	0	29.309	1458200	1190700	267460	-0.398653	1.77668	2.17534	427
P19623	Spermidine synthase	SRM	sp|P19623|SPEE_HUMAN Spermidine synthase OS=Homo sapiens GN=SRM PE=1 SV=1	1	1	4.3	33.824	302	0.0089903	5.9826	182380	148870	33504	-0.401421	-1.223	-0.821581	381
O43143	Pre-mRNA-splicing factor ATP-dependent RNA helicase DHX15	DHX15	sp|O43143|DHX15_HUMAN Pre-mRNA-splicing factor ATP-dependent RNA helicase DHX15 OS=Homo sapiens GN=DHX15 PE=1 SV=2	1	10	13.6	90.932	795	0	71.26	1316200	1073900	242270	-0.404898	1.62773	2.03263	118
Q9P2J5	Leucine--tRNA ligase, cytoplasmic	LARS	sp|Q9P2J5|SYLC_HUMAN Leucine--tRNA ligase, cytoplasmic OS=Homo sapiens GN=LARS PE=1 SV=2	1	26	25.3	134.46	1176	0	303.2	2830000	2308900	521130	-0.405577	2.73208	3.13766	1366
P39656	Dolichyl-diphosphooligosaccharide--protein glycosyltransferase 48 kDa subunit	DDOST	sp|P39656|OST48_HUMAN Dolichyl-diphosphooligosaccharide--protein glycosyltransferase 48 kDa subunit OS=Homo sapiens GN=DDOST PE=1 SV=4	1	3	6.8	50.8	456	0	16.899	258800	211120	47679	-0.40643	-0.71899	-0.31256	498
Q71U36;Q13748;Q6PEY2	Tubulin alpha-1A chain;Tubulin alpha-3C/D chain;Tubulin alpha-3E chain	TUBA1A;TUBA3C;TUBA3E	sp|Q71U36|TBA1A_HUMAN Tubulin alpha-1A chain OS=Homo sapiens GN=TUBA1A PE=1 SV=1;sp|Q13748|TBA3C_HUMAN Tubulin alpha-3C/D chain OS=Homo sapiens GN=TUBA3C PE=1 SV=3;sp|Q6PEY2|TBA3E_HUMAN Tubulin alpha-3E chain OS=Homo sapiens GN=TUBA3E PE=1 SV=2	3	28	68.7	50.135	451	0	36.958	8599500	7007600	1591900	-0.414898	4.33379	4.74869	988
P06733;P13929;P09104	Alpha-enolase	ENO1	sp|P06733|ENOA_HUMAN Alpha-enolase OS=Homo sapiens GN=ENO1 PE=1 SV=2	3	5	16.4	47.168	434	0	38.431	1072700	872790	199870	-0.426495	1.32858	1.75508	282
Q09666	Neuroblast differentiation-associated protein AHNAK	AHNAK	sp|Q09666|AHNK_HUMAN Neuroblast differentiation-associated protein AHNAK OS=Homo sapiens GN=AHNAK PE=1 SV=2	1	16	12.3	629.09	5890	0	98.447	225830	183650	42183	-0.430843	-0.920095	-0.489252	770
Q8N3J2	Methyltransferase-like protein 4	METTL4	sp|Q8N3J2|METL4_HUMAN Methyltransferase-like protein 4 OS=Homo sapiens GN=METTL4 PE=2 SV=3	1	1	1.7	54.041	472	0.0022272	6.4208	6083200	4944400	1138800	-0.434788	3.83067	4.26546	1054
P29692	Elongation factor 1-delta	EEF1D	sp|P29692|EF1D_HUMAN Elongation factor 1-delta OS=Homo sapiens GN=EEF1D PE=1 SV=5	1	6	29.5	31.121	281	0	124.3	2363700	1919100	444670	-0.443445	2.4653	2.90875	444
O00232	26S proteasome non-ATPase regulatory subunit 12	PSMD12	sp|O00232|PSD12_HUMAN 26S proteasome non-ATPase regulatory subunit 12 OS=Homo sapiens GN=PSMD12 PE=1 SV=3	1	12	30.7	52.904	456	0	89.785	2268500	1837800	430710	-0.459879	2.40285	2.86273	72
Q86TJ2	Transcriptional adapter 2-beta	TADA2B	sp|Q86TJ2|TAD2B_HUMAN Transcriptional adapter 2-beta OS=Homo sapiens GN=TADA2B PE=1 SV=2	1	1	1.7	48.47	420	0.0016793	10.811	7325100	5932400	1392700	-0.462336	4.09349	4.55583	1016
Q8NEV1;P68400	Casein kinase II subunit alpha 3;Casein kinase II subunit alpha	CSNK2A3;CSNK2A1	sp|Q8NEV1|CSK23_HUMAN Casein kinase II subunit alpha 3 OS=Homo sapiens GN=CSNK2A3 PE=1 SV=2;sp|P68400|CSK21_HUMAN Casein kinase II subunit alpha OS=Homo sapiens GN=CSNK2A1 PE=1 SV=1	2	2	5.9	45.219	391	0.0016736	10.772	56410	45661	10749	-0.466308	-2.92802	-2.46171	710
O43809	Cleavage and polyadenylation specificity factor subunit 5	NUDT21	sp|O43809|CPSF5_HUMAN Cleavage and polyadenylation specificity factor subunit 5 OS=Homo sapiens GN=NUDT21 PE=1 SV=1	1	3	18.5	26.227	227	0	22.385	881060	713040	168030	-0.467804	1.03693	1.50473	139
P62987;P62979;P0CG47;P0CG48	Ubiquitin-60S ribosomal protein L40;Ubiquitin;60S ribosomal protein L40;Ubiquitin-40S ribosomal protein S27a;Ubiquitin;40S ribosomal protein S27a;Polyubiquitin-B;Ubiquitin;Polyubiquitin-C;Ubiquitin	UBA52;RPS27A;UBB;UBC	sp|P62987|RL40_HUMAN Ubiquitin-60S ribosomal protein L40 OS=Homo sapiens GN=UBA52 PE=1 SV=2;sp|P62979|RS27A_HUMAN Ubiquitin-40S ribosomal protein S27a OS=Homo sapiens GN=RPS27A PE=1 SV=2;sp|P0CG47|UBB_HUMAN Polyubiquitin-B OS=Homo sapiens GN=UBB PE=1 SV=1;	4	6	46.1	14.728	128	0	323.31	1196900000	968540000	228380000	-0.468693	11.4445	11.9132	311
P63244	Guanine nucleotide-binding protein subunit beta-2-like 1;Guanine nucleotide-binding protein subunit beta-2-like 1, N-terminally processed	GNB2L1	sp|P63244|RACK1_HUMAN Receptor of activated protein C kinase 1 OS=Homo sapiens GN=RACK1 PE=1 SV=3	1	10	41.3	35.076	317	0	181.22	3131300	2524600	606780	-0.496258	2.86093	3.35719	703
Q15149	Plectin	PLEC	sp|Q15149|PLEC_HUMAN Plectin OS=Homo sapiens GN=PLEC PE=1 SV=3	1	97	24.4	531.78	4684	0	323.31	1746800	1408200	338600	-0.49687	2.01873	2.5156	869
Q9H6S0	Probable ATP-dependent RNA helicase YTHDC2	YTHDC2	sp|Q9H6S0|YTDC2_HUMAN Probable ATP-dependent RNA helicase YTHDC2 OS=Homo sapiens GN=YTHDC2 PE=1 SV=2	1	3	2.8	160.25	1430	0	17.187	51883	41811	10072	-0.499536	-3.0551	-2.55556	1283
P25787	Proteasome subunit alpha type-2	PSMA2	sp|P25787|PSA2_HUMAN Proteasome subunit alpha type-2 OS=Homo sapiens GN=PSMA2 PE=1 SV=2	1	2	15	25.898	234	0.00093023	11.8	590300	475650	114660	-0.50053	0.452847	0.953377	422
Q15046	Lysine--tRNA ligase	KARS	sp|Q15046|SYK_HUMAN Lysine--tRNA ligase OS=Homo sapiens GN=KARS PE=1 SV=3	1	8	17.3	68.047	597	0	73.825	5804600	4673600	1131100	-0.50626	3.74941	4.25567	864
O14617	AP-3 complex subunit delta-1	AP3D1	sp|O14617|AP3D1_HUMAN AP-3 complex subunit delta-1 OS=Homo sapiens GN=AP3D1 PE=1 SV=1	1	4	4.5	130.16	1153	0	24.049	80128	64506	15623	-0.507306	-2.42955	-1.92224	86
P25311	Zinc-alpha-2-glycoprotein	AZGP1	sp|P25311|ZA2G_HUMAN Zinc-alpha-2-glycoprotein OS=Homo sapiens GN=AZGP1 PE=1 SV=2	1	8	36.9	34.258	298	0	76.596	6245500	5019200	1226300	-0.519922	3.85233	4.37225	416
P27348	14-3-3 protein theta	YWHAQ	sp|P27348|1433T_HUMAN 14-3-3 protein theta OS=Homo sapiens GN=YWHAQ PE=1 SV=1	1	3	13.1	27.764	245	0	22.603	313480	251890	61592	-0.52109	-0.46426	0.0568295	431
P40938	Replication factor C subunit 3	RFC3	sp|P40938|RFC3_HUMAN Replication factor C subunit 3 OS=Homo sapiens GN=RFC3 PE=1 SV=2	1	2	7.9	40.556	356	0.00089686	11.417	157840	126790	31049	-0.523246	-1.45461	-0.931367	505
P00492	Hypoxanthine-guanine phosphoribosyltransferase	HPRT1	sp|P00492|HPRT_HUMAN Hypoxanthine-guanine phosphoribosyltransferase OS=Homo sapiens GN=HPRT1 PE=1 SV=2	1	5	26.1	24.579	218	0	34.776	2012000	1615000	396980	-0.528673	2.21641	2.74508	243
P06730	Eukaryotic translation initiation factor 4E	EIF4E	sp|P06730|IF4E_HUMAN Eukaryotic translation initiation factor 4E OS=Homo sapiens GN=EIF4E PE=1 SV=2	1	1	6.5	25.097	217	0.0016461	9.4614	389630	312600	77026	-0.532167	-0.152737	0.379431	281
P01876;P01877	Ig alpha-1 chain C region;Ig alpha-2 chain C region	IGHA1;IGHA2	sp|P01876|IGHA1_HUMAN Ig alpha-1 chain C region OS=Homo sapiens GN=IGHA1 PE=1 SV=2;sp|P01877|IGHA2_HUMAN Ig alpha-2 chain C region OS=Homo sapiens GN=IGHA2 PE=1 SV=3	2	4	14.4	37.654	353	0	27.001	1583700	1267900	315800	-0.54771	1.86732	2.41503	249
P09001	39S ribosomal protein L3, mitochondrial	MRPL3	sp|P09001|RM03_HUMAN 39S ribosomal protein L3, mitochondrial OS=Homo sapiens GN=MRPL3 PE=1 SV=1	1	2	7.5	38.632	348	0.0016667	10.722	150630	120450	30181	-0.556347	-1.52862	-0.972273	303
P33316	Deoxyuridine 5-triphosphate nucleotidohydrolase, mitochondrial	DUT	sp|P33316|DUT_HUMAN Deoxyuridine 5-triphosphate nucleotidohydrolase, mitochondrial OS=Homo sapiens GN=DUT PE=1 SV=4	1	1	4.8	26.563	252	0.0036684	6.3511	127740	102000	25733	-0.56619	-1.76848	-1.20229	465
P68871;P02042;CON__P02070;CON__Q3SX09;P69892;P69891;P02100	Hemoglobin subunit beta;LVV-hemorphin-7;Spinorphin;Hemoglobin subunit delta	HBB;HBD	sp|P68871|HBB_HUMAN Hemoglobin subunit beta OS=Homo sapiens GN=HBB PE=1 SV=2;sp|P02042|HBD_HUMAN Hemoglobin subunit delta OS=Homo sapiens GN=HBD PE=1 SV=2	7	3	26.5	15.998	147	0	18.931	1347300	1074100	273200	-0.577969	1.628	2.20597	712
P06702	Protein S100-A9	S100A9	sp|P06702|S10A9_HUMAN Protein S100-A9 OS=Homo sapiens GN=S100A9 PE=1 SV=1	1	6	51.8	13.242	114	0	250.54	46877000	37363000	9513300	-0.579475	6.74841	7.32789	280
P11586	C-1-tetrahydrofolate synthase, cytoplasmic;Methylenetetrahydrofolate dehydrogenase;Methenyltetrahydrofolate cyclohydrolase;Formyltetrahydrofolate synthetase;C-1-tetrahydrofolate synthase, cytoplasmic, N-terminally processed	MTHFD1	sp|P11586|C1TC_HUMAN C-1-tetrahydrofolate synthase, cytoplasmic OS=Homo sapiens GN=MTHFD1 PE=1 SV=3	1	16	20.5	101.56	935	0	125.37	1792600	1428500	364160	-0.581211	2.03938	2.62059	328
Q9Y6A5	Transforming acidic coiled-coil-containing protein 3	TACC3	sp|Q9Y6A5|TACC3_HUMAN Transforming acidic coiled-coil-containing protein 3 OS=Homo sapiens GN=TACC3 PE=1 SV=1	1	2	3.8	90.359	838	0.00094877	11.889	49399	39349	10050	-0.583937	-3.14266	-2.55872	1487
Q08554	Desmocollin-1	DSC1	sp|Q08554|DSC1_HUMAN Desmocollin-1 OS=Homo sapiens GN=DSC1 PE=1 SV=2	1	5	8.1	99.986	894	0	56.819	2031300	1613800	417420	-0.602179	2.21534	2.81751	766
P15924	Desmoplakin	DSP	sp|P15924|DESP_HUMAN Desmoplakin OS=Homo sapiens GN=DSP PE=1 SV=3	1	64	24.3	331.77	2871	0	323.31	3494800	2774500	720300	-0.60751	2.9971	3.60461	359
P36873	Serine/threonine-protein phosphatase PP1-gamma catalytic subunit	PPP1CC	sp|P36873|PP1G_HUMAN Serine/threonine-protein phosphatase PP1-gamma catalytic subunit OS=Homo sapiens GN=PPP1CC PE=1 SV=1	1	7	28.8	36.983	323	0	54.813	1985900	1575600	410230	-0.611673	2.18077	2.79245	489
P62899	60S ribosomal protein L31	RPL31	sp|P62899|RL31_HUMAN 60S ribosomal protein L31 OS=Homo sapiens GN=RPL31 PE=1 SV=1	1	2	18.4	14.463	125	0	30.824	2820100	2227600	592540	-0.642563	2.68036	3.32293	692
Q8IYT4	Katanin p60 ATPase-containing subunit A-like 2	KATNAL2	sp|Q8IYT4|KATL2_HUMAN Katanin p60 ATPase-containing subunit A-like 2 OS=Homo sapiens GN=KATNAL2 PE=2 SV=3	1	1	2.2	61.252	538	0.00088339	11.26	262100	207000	55099	-0.643536	-0.747423	-0.103888	1047
Q9H425	Uncharacterized protein C1orf198	C1orf198	sp|Q9H425|CA198_HUMAN Uncharacterized protein C1orf198 OS=Homo sapiens GN=C1orf198 PE=1 SV=1	1	2	7	36.346	327	0.00096061	12.121	139720	110170	29552	-0.654664	-1.65732	-1.00266	1276
O60610	Protein diaphanous homolog 1	DIAPH1	sp|O60610|DIAP1_HUMAN Protein diaphanous homolog 1 OS=Homo sapiens GN=DIAPH1 PE=1 SV=2	1	2	2	141.35	1272	0.00086957	11.117	50802	40047	10755	-0.656382	-3.11729	-2.46091	155
Q04637	Eukaryotic translation initiation factor 4 gamma 1	EIF4G1	sp|Q04637|IF4G1_HUMAN Eukaryotic translation initiation factor 4 gamma 1 OS=Homo sapiens GN=EIF4G1 PE=1 SV=4	1	40	26.6	175.49	1599	0	323.31	15126000	11912000	3214200	-0.663183	5.09922	5.7624	748
Q96DA0	Zymogen granule protein 16 homolog B	ZG16B	sp|Q96DA0|ZG16B_HUMAN Zymogen granule protein 16 homolog B OS=Homo sapiens GN=ZG16B PE=1 SV=3	1	1	7.7	22.739	208	0.00095877	12.086	484850	381400	103450	-0.670698	0.134251	0.804949	1155
P31040	Succinate dehydrogenase [ubiquinone] flavoprotein subunit, mitochondrial	SDHA	sp|P31040|SDHA_HUMAN Succinate dehydrogenase [ubiquinone] flavoprotein subunit, mitochondrial OS=Homo sapiens GN=SDHA PE=1 SV=2	1	4	7.4	72.691	664	0	23.324	341930	268630	73296	-0.679255	-0.371433	0.307821	452
P62318	Small nuclear ribonucleoprotein Sm D3	SNRPD3	sp|P62318|SMD3_HUMAN Small nuclear ribonucleoprotein Sm D3 OS=Homo sapiens GN=SNRPD3 PE=1 SV=1	1	1	7.9	13.916	126	0.0022539	6.5577	546710	428860	117850	-0.689512	0.303453	0.992966	675
P61026;Q9H0U4;Q92928;P51153;P62820;Q92930;P61006;P59190	Ras-related protein Rab-10;Ras-related protein Rab-1B;Putative Ras-related protein Rab-1C;Ras-related protein Rab-13;Ras-related protein Rab-1A;Ras-related protein Rab-8B;Ras-related protein Rab-8A;Ras-related protein Rab-15	RAB10;RAB1B;RAB1C;RAB13;RAB1A;RAB8B;RAB8A;RAB15	sp|P61026|RAB10_HUMAN Ras-related protein Rab-10 OS=Homo sapiens GN=RAB10 PE=1 SV=1;sp|Q9H0U4|RAB1B_HUMAN Ras-related protein Rab-1B OS=Homo sapiens GN=RAB1B PE=1 SV=1;sp|Q92928|RAB1C_HUMAN Putative Ras-related protein Rab-1C OS=Homo sapiens GN=RAB1C PE=5	8	2	11.5	22.541	200	0.0016935	10.919	503010	394510	108500	-0.690701	0.183008	0.873709	642
Q9NPI6	mRNA-decapping enzyme 1A	DCP1A	sp|Q9NPI6|DCP1A_HUMAN mRNA-decapping enzyme 1A OS=Homo sapiens GN=DCP1A PE=1 SV=2	1	2	4.8	63.309	582	0.00086281	11.075	145830	114360	31471	-0.691581	-1.60347	-0.911891	1310
Q9UBN7	Histone deacetylase 6	HDAC6	sp|Q9UBN7|HDAC6_HUMAN Histone deacetylase 6 OS=Homo sapiens GN=HDAC6 PE=1 SV=2	1	12	14.6	131.42	1215	0	323.31	3911800	3067200	844650	-0.692572	3.1418	3.83437	1375
Q9H4I3	TraB domain-containing protein	TRABD	sp|Q9H4I3|TRABD_HUMAN TraB domain-containing protein OS=Homo sapiens GN=TRABD PE=1 SV=1	1	1	3.5	42.321	376	0.003639	6.3019	68600	53709	14890	-0.702248	-2.69382	-1.99157	1279
Q12905	Interleukin enhancer-binding factor 2	ILF2	sp|Q12905|ILF2_HUMAN Interleukin enhancer-binding factor 2 OS=Homo sapiens GN=ILF2 PE=1 SV=2	1	9	28.7	43.062	390	0	165.97	5664800	4435100	1229600	-0.70229	3.67384	4.37613	781
O15479	Melanoma-associated antigen B2	MAGEB2	sp|O15479|MAGB2_HUMAN Melanoma-associated antigen B2 OS=Homo sapiens GN=MAGEB2 PE=1 SV=3	1	1	5	35.277	319	0.0022338	6.4516	89513	69943	19570	-0.715533	-2.3128	-1.59727	116
P61353	60S ribosomal protein L27	RPL27	sp|P61353|RL27_HUMAN 60S ribosomal protein L27 OS=Homo sapiens GN=RPL27 PE=1 SV=2	1	4	36	15.798	136	0	24.118	3367500	2630000	737510	-0.71874	2.91994	3.63868	650
Q7Z2W4	Zinc finger CCCH-type antiviral protein 1	ZC3HAV1	sp|Q7Z2W4|ZCCHV_HUMAN Zinc finger CCCH-type antiviral protein 1 OS=Homo sapiens GN=ZC3HAV1 PE=1 SV=3	1	7	10.8	101.43	902	0	52.777	239600	186890	52709	-0.727	-0.894865	-0.167865	998
P04406	Glyceraldehyde-3-phosphate dehydrogenase	GAPDH	sp|P04406|G3P_HUMAN Glyceraldehyde-3-phosphate dehydrogenase OS=Homo sapiens GN=GAPDH PE=1 SV=3	1	6	30.4	36.053	335	0	79.546	3549000	2763600	785430	-0.738073	2.99142	3.7295	261
P31153	S-adenosylmethionine synthase isoform type-2	MAT2A	sp|P31153|METK2_HUMAN S-adenosylmethionine synthase isoform type-2 OS=Homo sapiens GN=MAT2A PE=1 SV=1	1	1	3.8	43.66	395	0.0036232	6.2538	181970	141680	40296	-0.739141	-1.29442	-0.555277	454
Q13155	Aminoacyl tRNA synthase complex-interacting multifunctional protein 2	AIMP2	sp|Q13155|AIMP2_HUMAN Aminoacyl tRNA synthase complex-interacting multifunctional protein 2 OS=Homo sapiens GN=AIMP2 PE=1 SV=2	1	2	11.6	35.348	320	0	23.357	621210	483460	137750	-0.741724	0.476343	1.21807	792
P62750	60S ribosomal protein L23a	RPL23A	sp|P62750|RL23A_HUMAN 60S ribosomal protein L23a OS=Homo sapiens GN=RPL23A PE=1 SV=1	1	4	21.2	17.695	156	0	29.114	3891600	3027100	864590	-0.74522	3.12281	3.86803	680
Q12904	Aminoacyl tRNA synthase complex-interacting multifunctional protein 1;Endothelial monocyte-activating polypeptide 2	AIMP1	sp|Q12904|AIMP1_HUMAN Aminoacyl tRNA synthase complex-interacting multifunctional protein 1 OS=Homo sapiens GN=AIMP1 PE=1 SV=2	1	6	38.1	34.352	312	0	189.28	3088900	2401500	687390	-0.748333	2.78881	3.53714	780
O94979	Protein transport protein Sec31A	SEC31A	sp|O94979|SC31A_HUMAN Protein transport protein Sec31A OS=Homo sapiens GN=SEC31A PE=1 SV=3	1	2	1.8	133.01	1220	0.0010277	13.916	64431	50048	14383	-0.75412	-2.79567	-2.04155	208
P31025;Q5VSP4	Lipocalin-1;Putative lipocalin 1-like protein 1	LCN1;LCN1P1	sp|P31025|LCN1_HUMAN Lipocalin-1 OS=Homo sapiens GN=LCN1 PE=1 SV=1;sp|Q5VSP4|LC1L1_HUMAN Putative lipocalin 1-like protein 1 OS=Homo sapiens GN=LCN1P1 PE=5 SV=1	2	3	16.5	19.25	176	0	28.684	4476400	3470900	1005400	-0.765528	3.32018	4.08571	451
P46781	40S ribosomal protein S9	RPS9	sp|P46781|RS9_HUMAN 40S ribosomal protein S9 OS=Homo sapiens GN=RPS9 PE=1 SV=3	1	6	27.3	22.591	194	0	34.583	1998100	1547300	450800	-0.773874	2.15463	2.9285	537
Q6R327	Rapamycin-insensitive companion of mTOR	RICTOR	sp|Q6R327|RICTR_HUMAN Rapamycin-insensitive companion of mTOR OS=Homo sapiens GN=RICTOR PE=1 SV=1	1	24	18	192.22	1708	0	187.16	772730	598160	174560	-0.77626	0.783478	1.55974	979
Q7Z417	Nuclear fragile X mental retardation-interacting protein 2	NUFIP2	sp|Q7Z417|NUFP2_HUMAN Nuclear fragile X mental retardation-interacting protein 2 OS=Homo sapiens GN=NUFIP2 PE=1 SV=1	1	2	3.5	76.12	695	0.00099701	12.903	167590	129710	37881	-0.777325	-1.42176	-0.64444	1004
Q9UIA9	Exportin-7	XPO7	sp|Q9UIA9|XPO7_HUMAN Exportin-7 OS=Homo sapiens GN=XPO7 PE=1 SV=3	1	1	1	123.91	1087	0.0089841	5.9796	15502	11980	3522.6	-0.787153	-4.85835	-4.0712	1394
P42771	Cyclin-dependent kinase inhibitor 2A	CDKN2A	sp|P42771|CDN2A_HUMAN Cyclin-dependent kinase inhibitor 2A OS=Homo sapiens GN=CDKN2A PE=1 SV=2	1	2	18.6	16.532	156	0	18.064	576590	445170	131420	-0.792898	0.357302	1.1502	520
Q8NC69	BTB/POZ domain-containing protein KCTD6	KCTD6	sp|Q8NC69|KCTD6_HUMAN BTB/POZ domain-containing protein KCTD6 OS=Homo sapiens GN=KCTD6 PE=1 SV=2	1	1	7.2	27.61	237	0.0015528	7.0639	270530	208780	61748	-0.795549	-0.735071	0.0604782	1066
P11940;Q9H361;Q4VXU2;Q96DU9	Polyadenylate-binding protein 1;Polyadenylate-binding protein 3	PABPC1;PABPC3	sp|P11940|PABP1_HUMAN Polyadenylate-binding protein 1 OS=Homo sapiens GN=PABPC1 PE=1 SV=2;sp|Q9H361|PABP3_HUMAN Polyadenylate-binding protein 3 OS=Homo sapiens GN=PABPC3 PE=1 SV=2	4	21	36.2	70.67	636	0	323.31	6403300	4940200	1463100	-0.797527	3.82944	4.62697	331
Q02952	A-kinase anchor protein 12	AKAP12	sp|Q02952|AKA12_HUMAN A-kinase anchor protein 12 OS=Homo sapiens GN=AKAP12 PE=1 SV=4	1	5	4.3	191.48	1782	0	28.865	107450	82888	24564	-0.798451	-2.06782	-1.26937	744
O15371	Eukaryotic translation initiation factor 3 subunit D	EIF3D	sp|O15371|EIF3D_HUMAN Eukaryotic translation initiation factor 3 subunit D OS=Homo sapiens GN=EIF3D PE=1 SV=1	1	1	2.6	63.972	548	0.0036711	6.3699	286200	220320	65878	-0.811337	-0.657454	0.153883	113
P05198	Eukaryotic translation initiation factor 2 subunit 1	EIF2S1	sp|P05198|IF2A_HUMAN Eukaryotic translation initiation factor 2 subunit 1 OS=Homo sapiens GN=EIF2S1 PE=1 SV=3	1	4	12.1	36.112	315	0	36.224	1165400	897110	268330	-0.811792	1.36823	2.18002	272
Q13835	Plakophilin-1	PKP1	sp|Q13835|PKP1_HUMAN Plakophilin-1 OS=Homo sapiens GN=PKP1 PE=1 SV=2	1	1	1.5	82.86	747	0.0070522	6.0526	29080	22308	6772.2	-0.833203	-3.96142	-3.12822	816
Q9NR30	Nucleolar RNA helicase 2	DDX21	sp|Q9NR30|DDX21_HUMAN Nucleolar RNA helicase 2 OS=Homo sapiens GN=DDX21 PE=1 SV=5	1	2	3.6	87.343	783	0.0010384	14.598	103330	79206	24123	-0.837869	-2.13337	-1.2955	1317
Q00610;P53675	Clathrin heavy chain 1	CLTC	sp|Q00610|CLH1_HUMAN Clathrin heavy chain 1 OS=Homo sapiens GN=CLTC PE=1 SV=5	2	23	16.4	191.61	1675	0	200.5	971650	743290	228360	-0.850454	1.09687	1.94732	729
P62249	40S ribosomal protein S16	RPS16	sp|P62249|RS16_HUMAN 40S ribosomal protein S16 OS=Homo sapiens GN=RPS16 PE=1 SV=2	1	8	45.9	16.445	146	0	115.48	19756000	15102000	4654300	-0.854965	5.44154	6.29651	665
Q16610	Extracellular matrix protein 1	ECM1	sp|Q16610|ECM1_HUMAN Extracellular matrix protein 1 OS=Homo sapiens GN=ECM1 PE=1 SV=2	1	1	2.4	60.673	540	0.0022953	6.8441	64008	48857	15151	-0.863915	-2.83042	-1.9665	901
Q9Y277	Voltage-dependent anion-selective channel protein 3	VDAC3	sp|Q9Y277|VDAC3_HUMAN Voltage-dependent anion-selective channel protein 3 OS=Homo sapiens GN=VDAC3 PE=1 SV=1	1	1	4.6	30.658	283	0.00095511	12.021	423420	322610	100810	-0.874916	-0.107264	0.767653	1439
O75340	Programmed cell death protein 6	PDCD6	sp|O75340|PDCD6_HUMAN Programmed cell death protein 6 OS=Homo sapiens GN=PDCD6 PE=1 SV=1	1	3	17.8	21.868	191	0	38.569	2963200	2257400	705790	-0.875717	2.69954	3.57525	173
P22087	rRNA 2-O-methyltransferase fibrillarin	FBL	sp|P22087|FBRL_HUMAN rRNA 2-O-methyltransferase fibrillarin OS=Homo sapiens GN=FBL PE=1 SV=2	1	5	21.5	33.784	321	0	30.097	486260	370340	115920	-0.877346	0.0917969	0.969143	395
Q96PK6;A0A0A0MSL8	RNA-binding protein 14	RBM14	sp|Q96PK6|RBM14_HUMAN RNA-binding protein 14 OS=Homo sapiens GN=RBM14 PE=1 SV=2	2	4	7.8	69.491	669	0	24.958	477210	363310	113900	-0.879635	0.0641479	0.943783	1174
P61962	DDB1- and CUL4-associated factor 7	DCAF7	sp|P61962|DCAF7_HUMAN DDB1- and CUL4-associated factor 7 OS=Homo sapiens GN=DCAF7 PE=1 SV=1	1	3	12.6	38.926	342	0	16.747	390500	296850	93648	-0.888655	-0.22732	0.661335	655
Q01082	Spectrin beta chain, non-erythrocytic 1	SPTBN1	sp|Q01082|SPTB2_HUMAN Spectrin beta chain, non-erythrocytic 1 OS=Homo sapiens GN=SPTBN1 PE=1 SV=2	1	2	0.8	274.61	2364	0.0016694	10.732	15895	12082	3812.1	-0.888866	-4.84612	-3.95726	732
P22061	Protein-L-isoaspartate(D-aspartate) O-methyltransferase	PCMT1	sp|P22061|PIMT_HUMAN Protein-L-isoaspartate(D-aspartate) O-methyltransferase OS=Homo sapiens GN=PCMT1 PE=1 SV=4	1	13	58.6	24.636	227	0	323.31	86292000	65585000	20707000	-0.889822	7.56017	8.44999	394
P05109	Protein S100-A8;Protein S100-A8, N-terminally processed	S100A8	sp|P05109|S10A8_HUMAN Protein S100-A8 OS=Homo sapiens GN=S100A8 PE=1 SV=1	1	6	51.6	10.834	93	0	80.51	28370000	21557000	6812500	-0.891169	5.95496	6.84613	270
P21333	Filamin-A	FLNA	sp|P21333|FLNA_HUMAN Filamin-A OS=Homo sapiens GN=FLNA PE=1 SV=4	1	45	24.3	280.74	2647	0	323.31	1692000	1283700	408300	-0.900463	1.88518	2.78564	389
Q7KZF4	Staphylococcal nuclease domain-containing protein 1	SND1	sp|Q7KZF4|SND1_HUMAN Staphylococcal nuclease domain-containing protein 1 OS=Homo sapiens GN=SND1 PE=1 SV=1	1	20	27.7	102	910	0	154.78	1819900	1379300	440550	-0.906511	1.98881	2.89532	990
O43684	Mitotic checkpoint protein BUB3	BUB3	sp|O43684|BUB3_HUMAN Mitotic checkpoint protein BUB3 OS=Homo sapiens GN=BUB3 PE=1 SV=1	1	6	24.7	37.154	328	0	78.713	1714600	1295700	418920	-0.924084	1.89861	2.82269	134
P98161	Polycystin-1	PKD1	sp|P98161|PKD1_HUMAN Polycystin-1 OS=Homo sapiens GN=PKD1 PE=1 SV=3	1	2	0.4	462.52	4303	0.00086133	11.062	1953700	1476300	477390	-0.924322	2.08686	3.01118	723
Q99873	Protein arginine N-methyltransferase 1	PRMT1	sp|Q99873|ANM1_HUMAN Protein arginine N-methyltransferase 1 OS=Homo sapiens GN=PRMT1 PE=1 SV=2	1	2	7.5	41.515	361	0.0010194	13.535	230800	173870	56926	-0.942218	-0.999044	-0.0568266	1205
Q86UK7	Zinc finger protein 598	ZNF598	sp|Q86UK7|ZN598_HUMAN Zinc finger protein 598 OS=Homo sapiens GN=ZNF598 PE=1 SV=1	1	4	5	98.636	904	0	23.645	167390	125970	41418	-0.948318	-1.46397	-0.515656	1018
P15531	Nucleoside diphosphate kinase A	NME1	sp|P15531|NDKA_HUMAN Nucleoside diphosphate kinase A OS=Homo sapiens GN=NME1 PE=1 SV=1	1	6	46.1	17.149	152	0.00096899	12.309	868340	651440	216900	-0.966467	0.906578	1.87304	357
Q07021	Complement component 1 Q subcomponent-binding protein, mitochondrial	C1QBP	sp|Q07021|C1QBP_HUMAN Complement component 1 Q subcomponent-binding protein, mitochondrial OS=Homo sapiens GN=C1QBP PE=1 SV=1	1	6	31.6	31.362	282	0	163.27	16916000	12673000	4243700	-0.974705	5.18856	6.16327	758
P04183	Thymidine kinase, cytosolic	TK1	sp|P04183|KITH_HUMAN Thymidine kinase, cytosolic OS=Homo sapiens GN=TK1 PE=1 SV=2	1	4	26.1	25.468	234	0	84.571	2036400	1523100	513250	-0.983791	2.13189	3.11568	257
Q14657	EKC/KEOPS complex subunit LAGE3	LAGE3	sp|Q14657|LAGE3_HUMAN EKC/KEOPS complex subunit LAGE3 OS=Homo sapiens GN=LAGE3 PE=1 SV=2	1	1	16.1	14.804	143	0.0070721	6.0595	385580	288280	97293	-0.986006	-0.269583	0.716423	843
P62701;P22090;Q8TD47	40S ribosomal protein S4, X isoform	RPS4X	sp|P62701|RS4X_HUMAN 40S ribosomal protein S4, X isoform OS=Homo sapiens GN=RPS4X PE=1 SV=2	3	12	46.4	29.597	263	0	150.43	6076200	4536400	1539800	-0.994263	3.70642	4.70069	678
P38606	V-type proton ATPase catalytic subunit A	ATP6V1A	sp|P38606|VATA_HUMAN V-type proton ATPase catalytic subunit A OS=Homo sapiens GN=ATP6V1A PE=1 SV=2	1	2	4.4	68.303	617	0.00087336	11.157	87266	65148	22117	-0.994503	-2.41526	-1.42076	493
P25789	Proteasome subunit alpha type-4	PSMA4	sp|P25789|PSA4_HUMAN Proteasome subunit alpha type-4 OS=Homo sapiens GN=PSMA4 PE=1 SV=1	1	6	23.4	29.483	261	0	34.826	7332200	5473300	1858800	-0.995028	3.97729	4.97231	424
P61106	Ras-related protein Rab-14	RAB14	sp|P61106|RAB14_HUMAN Ras-related protein Rab-14 OS=Homo sapiens GN=RAB14 PE=1 SV=4	1	3	27.4	23.897	215	0	50.097	779650	581380	198270	-1.00105	0.742428	1.74348	643
P62304	Small nuclear ribonucleoprotein E	SNRPE	sp|P62304|RUXE_HUMAN Small nuclear ribonucleoprotein E OS=Homo sapiens GN=SNRPE PE=1 SV=1	1	1	12	10.803	92	0.0016393	9.1125	1178000	877710	300280	-1.00563	1.33669	2.34232	673
P09661	U2 small nuclear ribonucleoprotein A	SNRPA1	sp|P09661|RU2A_HUMAN U2 small nuclear ribonucleoprotein A OS=Homo sapiens GN=SNRPA1 PE=1 SV=2	1	19	63.5	28.415	255	0	323.31	502840000	374540000	128300000	-1.00747	10.0739	11.0813	306
Q96GD4	Aurora kinase B	AURKB	sp|Q96GD4|AURKB_HUMAN Aurora kinase B OS=Homo sapiens GN=AURKB PE=1 SV=3	1	4	16	39.31	344	0	26.066	299460	220750	78704	-1.06516	-0.65464	0.410522	1163
Q13151	Heterogeneous nuclear ribonucleoprotein A0	HNRNPA0	sp|Q13151|ROA0_HUMAN Heterogeneous nuclear ribonucleoprotein A0 OS=Homo sapiens GN=HNRNPA0 PE=1 SV=1	1	3	16.1	30.84	305	0	47.516	1223000	901290	321660	-1.06661	1.37494	2.44155	791
P12273	Prolactin-inducible protein	PIP	sp|P12273|PIP_HUMAN Prolactin-inducible protein OS=Homo sapiens GN=PIP PE=1 SV=1	1	3	15.1	16.572	146	0	63.807	21277000	15672000	5604500	-1.06954	5.49499	6.56453	337
P32119	Peroxiredoxin-2	PRDX2	sp|P32119|PRDX2_HUMAN Peroxiredoxin-2 OS=Homo sapiens GN=PRDX2 PE=1 SV=5	1	6	27.8	21.892	198	0	30.409	1992000	1465600	526360	-1.0757	2.07637	3.15206	463
Q9Y2J2	Band 4.1-like protein 3;Band 4.1-like protein 3, N-terminally processed	EPB41L3	sp|Q9Y2J2|E41L3_HUMAN Band 4.1-like protein 3 OS=Homo sapiens GN=EPB41L3 PE=1 SV=2	1	7	8.8	120.68	1087	0	53.802	261490	192260	69227	-1.07942	-0.853994	0.225422	1445
Q92598	Heat shock protein 105 kDa	HSPH1	sp|Q92598|HS105_HUMAN Heat shock protein 105 kDa OS=Homo sapiens GN=HSPH1 PE=1 SV=1	1	32	45	96.864	858	0	323.31	12649000	9286500	3362100	-1.0873	4.74001	5.8273	1122
Q01469	Fatty acid-binding protein, epidermal	FABP5	sp|Q01469|FABP5_HUMAN Fatty acid-binding protein, epidermal OS=Homo sapiens GN=FABP5 PE=1 SV=3	1	3	20	15.164	135	0	25.325	7098800	5191500	1907300	-1.10845	3.90103	5.00947	735
P60866	40S ribosomal protein S20	RPS20	sp|P60866|RS20_HUMAN 40S ribosomal protein S20 OS=Homo sapiens GN=RPS20 PE=1 SV=1	1	3	20.2	13.373	119	0	120.81	30748000	22458000	8290300	-1.11533	6.01403	7.12937	639
Q9H2G2	STE20-like serine/threonine-protein kinase	SLK	sp|Q9H2G2|SLK_HUMAN STE20-like serine/threonine-protein kinase OS=Homo sapiens GN=SLK PE=1 SV=1	1	2	2.1	142.69	1235	0.00091408	11.587	26966	19689	7277.1	-1.11711	-4.14159	-3.02448	1269
P28482	Mitogen-activated protein kinase 1	MAPK1	sp|P28482|MK01_HUMAN Mitogen-activated protein kinase 1 OS=Homo sapiens GN=MAPK1 PE=1 SV=3	1	2	7.8	41.389	360	0	22.034	145240	105970	39277	-1.12117	-1.7134	-0.592229	440
P31151;Q86SG5	Protein S100-A7	S100A7	sp|P31151|S10A7_HUMAN Protein S100-A7 OS=Homo sapiens GN=S100A7 PE=1 SV=4	2	4	42.6	11.471	101	0	42.037	22066000	16034000	6032600	-1.14279	5.52794	6.67072	453
P23528;Q9Y281	Cofilin-1;Cofilin-2	CFL1;CFL2	sp|P23528|COF1_HUMAN Cofilin-1 OS=Homo sapiens GN=CFL1 PE=1 SV=3;sp|Q9Y281|COF2_HUMAN Cofilin-2 OS=Homo sapiens GN=CFL2 PE=1 SV=1	2	2	13.9	18.502	166	0.0010537	16.437	991680	719590	272090	-1.14998	1.05012	2.2001	409
P62269	40S ribosomal protein S18	RPS18	sp|P62269|RS18_HUMAN 40S ribosomal protein S18 OS=Homo sapiens GN=RPS18 PE=1 SV=3	1	12	54.6	17.718	152	0	214.8	42236000	30638000	11598000	-1.15162	6.46212	7.61375	669
P61758	Prefoldin subunit 3	VBP1	sp|P61758|PFD3_HUMAN Prefoldin subunit 3 OS=Homo sapiens GN=VBP1 PE=1 SV=3	1	2	11.2	22.658	197	0.00088417	11.279	67224	48694	18530	-1.15919	-2.83524	-1.67605	653
P42766	60S ribosomal protein L35	RPL35	sp|P42766|RL35_HUMAN 60S ribosomal protein L35 OS=Homo sapiens GN=RPL35 PE=1 SV=2	1	1	8.1	14.551	123	0.001581	7.4409	2514500	1820600	693910	-1.16147	2.38929	3.55076	519
P14625	Endoplasmin	HSP90B1	sp|P14625|ENPL_HUMAN Endoplasmin OS=Homo sapiens GN=HSP90B1 PE=1 SV=1	1	7	9	92.468	803	0	42.814	515240	373010	142230	-1.16208	0.10216	1.26424	351
P63241;Q6IS14;Q9GZV4	Eukaryotic translation initiation factor 5A-1;Eukaryotic translation initiation factor 5A-1-like	EIF5A;EIF5AL1	sp|P63241|IF5A1_HUMAN Eukaryotic translation initiation factor 5A-1 OS=Homo sapiens GN=EIF5A PE=1 SV=2;sp|Q6IS14|IF5AL_HUMAN Eukaryotic translation initiation factor 5A-1-like OS=Homo sapiens GN=EIF5AL1 PE=2 SV=2	3	3	31.2	16.832	154	0	62.074	5565700	4021500	1544200	-1.17219	3.53261	4.7048	702
Q5TAX3	Terminal uridylyltransferase 4	ZCCHC11	sp|Q5TAX3|TUT4_HUMAN Terminal uridylyltransferase 4 OS=Homo sapiens GN=ZCCHC11 PE=1 SV=3	1	2	1.9	185.16	1644	0.00091158	11.567	35197	25407	9790.2	-1.17725	-3.77376	-2.5965	939
Q86U90	YrdC domain-containing protein, mitochondrial	YRDC	sp|Q86U90|YRDC_HUMAN YrdC domain-containing protein, mitochondrial OS=Homo sapiens GN=YRDC PE=1 SV=1	1	3	14	29.328	279	0	19.453	550440	396050	154390	-1.19396	0.188629	1.38259	1017
P09874	Poly [ADP-ribose] polymerase 1	PARP1	sp|P09874|PARP1_HUMAN Poly [ADP-ribose] polymerase 1 OS=Homo sapiens GN=PARP1 PE=1 SV=4	1	9	13.1	113.08	1014	0	60.601	694820	499840	194980	-1.19493	0.524412	1.71934	308
Q15181	Inorganic pyrophosphatase	PPA1	sp|Q15181|IPYR_HUMAN Inorganic pyrophosphatase OS=Homo sapiens GN=PPA1 PE=1 SV=2	1	5	21.8	32.66	289	0	29.307	1245600	894180	351460	-1.20586	1.36351	2.56937	871
P47897	Glutamine--tRNA ligase	QARS	sp|P47897|SYQ_HUMAN Glutamine--tRNA ligase OS=Homo sapiens GN=QARS PE=1 SV=1	1	21	33	87.798	775	0	173.13	2561700	1834100	727630	-1.21927	2.39995	3.61922	544
Q3MHD2	Protein LSM12 homolog	LSM12	sp|Q3MHD2|LSM12_HUMAN Protein LSM12 homolog OS=Homo sapiens GN=LSM12 PE=1 SV=2	1	2	13.8	21.701	195	0	17.453	758620	541080	217540	-1.23851	0.638788	1.87729	913
Q12888	Tumor suppressor p53-binding protein 1	TP53BP1	sp|Q12888|TP53B_HUMAN Tumor suppressor p53-binding protein 1 OS=Homo sapiens GN=TP53BP1 PE=1 SV=2	1	1	0.4	213.57	1972	0.0016	7.6796	80426	57264	23162	-1.2472	-2.60135	-1.35415	779
O14782	Kinesin-like protein KIF3C	KIF3C	sp|O14782|KIF3C_HUMAN Kinesin-like protein KIF3C OS=Homo sapiens GN=KIF3C PE=1 SV=3	1	1	1.5	89.425	793	0.002313	6.98	455730	324220	131510	-1.25127	-0.10008	1.15119	93
A5YKK6	CCR4-NOT transcription complex subunit 1	CNOT1	sp|A5YKK6|CNOT1_HUMAN CCR4-NOT transcription complex subunit 1 OS=Homo sapiens GN=CNOT1 PE=1 SV=2	1	7	3.3	266.94	2376	0	38.542	103560	73659	29902	-1.25245	-2.23812	-0.985672	12
Q9BRP1	Programmed cell death protein 2-like	PDCD2L	sp|Q9BRP1|PDD2L_HUMAN Programmed cell death protein 2-like OS=Homo sapiens GN=PDCD2L PE=1 SV=1	1	3	12.6	39.416	358	0	27.585	2545200	1808300	736970	-1.25811	2.37951	3.63762	1219
P62913	60S ribosomal protein L11	RPL11	sp|P62913|RL11_HUMAN 60S ribosomal protein L11 OS=Homo sapiens GN=RPL11 PE=1 SV=2	1	4	24.2	20.252	178	0	317.97	5754800	4082300	1672400	-1.26561	3.55426	4.81986	694
O15511	Actin-related protein 2/3 complex subunit 5	ARPC5	sp|O15511|ARPC5_HUMAN Actin-related protein 2/3 complex subunit 5 OS=Homo sapiens GN=ARPC5 PE=1 SV=3	1	1	7.9	16.32	151	0.0022091	6.3828	244480	173360	71111	-1.26744	-1.00328	0.264158	117
P0DN76;Q01081;M0R2N4;Q8WU68	Splicing factor U2AF 35 kDa subunit;Splicing factor U2AF 26 kDa subunit	U2AF1;U2AF1L4	sp|P0DN76|U2AF5_HUMAN Splicing factor U2AF 35 kDa subunit-like protein OS=Homo sapiens GN=U2AF1L5 PE=3 SV=1;sp|Q01081|U2AF1_HUMAN Splicing factor U2AF 35 kDa subunit OS=Homo sapiens GN=U2AF1 PE=1 SV=3;tr|M0R2N4|M0R2N4_HUMAN Uncharacterized protein OS=Homo	4	2	10.4	27.872	240	0	19.629	863000	608190	254810	-1.29797	0.807468	2.10544	313
Q9BRK5	45 kDa calcium-binding protein	SDF4	sp|Q9BRK5|CAB45_HUMAN 45 kDa calcium-binding protein OS=Homo sapiens GN=SDF4 PE=1 SV=1	1	8	32.6	41.806	362	0	68.498	2262700	1588700	673980	-1.316	2.19272	3.50872	1218
P62854;Q5JNZ5	40S ribosomal protein S26;Putative 40S ribosomal protein S26-like 1	RPS26;RPS26P11	sp|P62854|RS26_HUMAN 40S ribosomal protein S26 OS=Homo sapiens GN=RPS26 PE=1 SV=3;sp|Q5JNZ5|RS26L_HUMAN Putative 40S ribosomal protein S26-like 1 OS=Homo sapiens GN=RPS26P11 PE=5 SV=1	2	3	33.9	13.015	115	0	35.648	4850900	3375700	1475200	-1.35879	3.28006	4.63885	687
Q9NXA8	NAD-dependent protein deacylase sirtuin-5, mitochondrial	SIRT5	sp|Q9NXA8|SIR5_HUMAN NAD-dependent protein deacylase sirtuin-5, mitochondrial OS=Homo sapiens GN=SIRT5 PE=1 SV=2	1	9	39.7	33.881	310	0	227.78	4072100	2830700	1241400	-1.36388	3.02603	4.38991	1344
Q9NZL4	Hsp70-binding protein 1	HSPBP1	sp|Q9NZL4|HPBP1_HUMAN Hsp70-binding protein 1 OS=Homo sapiens GN=HSPBP1 PE=1 SV=1	1	7	26.2	39.474	362	0	68.763	3273800	2261200	1012600	-1.39404	2.70196	4.09601	1355
P62937;P0DN26;A0A0B4J2A2;A0A075B767;A0A075B759;Q9Y536;F5H284	Peptidyl-prolyl cis-trans isomerase A;Peptidyl-prolyl cis-trans isomerase A, N-terminally processed	PPIA	sp|P62937|PPIA_HUMAN Peptidyl-prolyl cis-trans isomerase A OS=Homo sapiens GN=PPIA PE=1 SV=2	7	9	50.3	18.012	165	0	77.106	13792000	9508100	4283500	-1.4027	4.77403	6.17673	696
P30041	Peroxiredoxin-6	PRDX6	sp|P30041|PRDX6_HUMAN Peroxiredoxin-6 OS=Homo sapiens GN=PRDX6 PE=1 SV=3	1	4	20.1	25.035	224	0	24.381	740500	509650	230850	-1.41052	0.552452	1.96297	445
O75663	TIP41-like protein	TIPRL	sp|O75663|TIPRL_HUMAN TIP41-like protein OS=Homo sapiens GN=TIPRL PE=1 SV=2	1	1	4.4	31.444	272	0.009009	5.9862	138570	95330	43242	-1.41257	-1.86605	-0.453481	188
Q9UJV9	Probable ATP-dependent RNA helicase DDX41	DDX41	sp|Q9UJV9|DDX41_HUMAN Probable ATP-dependent RNA helicase DDX41 OS=Homo sapiens GN=DDX41 PE=1 SV=2	1	3	5.6	69.837	622	0	17.381	126920	87295	39626	-1.41362	-1.99308	-0.579467	1400
Q14244	Ensconsin	MAP7	sp|Q14244|MAP7_HUMAN Ensconsin OS=Homo sapiens GN=MAP7 PE=1 SV=1	1	3	4.8	84.051	749	0	17.31	120060	82397	37659	-1.42347	-2.07639	-0.652919	834
O00571;O15523;Q9NQI0	ATP-dependent RNA helicase DDX3X;ATP-dependent RNA helicase DDX3Y	DDX3X;DDX3Y	sp|O00571|DDX3X_HUMAN ATP-dependent RNA helicase DDX3X OS=Homo sapiens GN=DDX3X PE=1 SV=3;sp|O15523|DDX3Y_HUMAN ATP-dependent RNA helicase DDX3Y OS=Homo sapiens GN=DDX3Y PE=1 SV=2	3	35	55.7	73.243	662	0	323.31	26423000	18109000	8313200	-1.42984	5.70351	7.13335	80
Q9UBV8	Peflin	PEF1	sp|Q9UBV8|PEF1_HUMAN Peflin OS=Homo sapiens GN=PEF1 PE=1 SV=1	1	7	19.4	30.381	284	0	49.255	4107000	2813900	1293100	-1.43133	3.01744	4.44878	1377
Q9H4A3;Q9BYP7;Q9Y3S1	Serine/threonine-protein kinase WNK1;Serine/threonine-protein kinase WNK3;Serine/threonine-protein kinase WNK2	WNK1;WNK3;WNK2	sp|Q9H4A3|WNK1_HUMAN Serine/threonine-protein kinase WNK1 OS=Homo sapiens GN=WNK1 PE=1 SV=2;sp|Q9BYP7|WNK3_HUMAN Serine/threonine-protein kinase WNK3 OS=Homo sapiens GN=WNK3 PE=1 SV=3;sp|Q9Y3S1|WNK2_HUMAN Serine/threonine-protein kinase WNK2 OS=Homo sapien	3	2	1.1	250.79	2382	0.00091491	11.593	58967	40198	18769	-1.4543	-3.11186	-1.65756	1278
P17707	S-adenosylmethionine decarboxylase proenzyme;S-adenosylmethionine decarboxylase alpha chain;S-adenosylmethionine decarboxylase beta chain	AMD1	sp|P17707|DCAM_HUMAN S-adenosylmethionine decarboxylase proenzyme OS=Homo sapiens GN=AMD1 PE=1 SV=2	1	1	3.6	38.339	334	0.0015962	7.6305	241350	164380	76970	-1.4584	-1.08002	0.378382	368
P62851	40S ribosomal protein S25	RPS25	sp|P62851|RS25_HUMAN 40S ribosomal protein S25 OS=Homo sapiens GN=RPS25 PE=1 SV=1	1	5	29.6	13.742	125	0	106.44	18176000	12369000	5806500	-1.46208	5.15353	6.61561	686
P46109	Crk-like protein	CRKL	sp|P46109|CRKL_HUMAN Crk-like protein OS=Homo sapiens GN=CRKL PE=1 SV=1	1	7	34.7	33.777	303	0	80.574	2508100	1706600	801470	-1.46266	2.296	3.75866	529
P22392;O60361	Nucleoside diphosphate kinase B;Putative nucleoside diphosphate kinase	NME2;NME2P1	sp|P22392|NDKB_HUMAN Nucleoside diphosphate kinase B OS=Homo sapiens GN=NME2 PE=1 SV=1;sp|O60361|NDK8_HUMAN Putative nucleoside diphosphate kinase OS=Homo sapiens GN=NME2P1 PE=5 SV=1	2	6	43.4	17.298	152	0	46.855	5419800	3687200	1732600	-1.46348	3.4074	4.87088	400
Q06323	Proteasome activator complex subunit 1	PSME1	sp|Q06323|PSME1_HUMAN Proteasome activator complex subunit 1 OS=Homo sapiens GN=PSME1 PE=1 SV=1	1	1	4.8	28.723	249	0.0022659	6.5996	146380	99001	47382	-1.48996	-1.81154	-0.321575	754
Q04206	Transcription factor p65	RELA	sp|Q04206|TF65_HUMAN Transcription factor p65 OS=Homo sapiens GN=RELA PE=1 SV=2	1	2	4.9	60.218	551	0.00087796	11.212	133350	90120	43227	-1.49315	-1.94713	-0.453981	746
P35030	Trypsin-3	PRSS3	sp|P35030|TRY3_HUMAN Trypsin-3 OS=Homo sapiens GN=PRSS3 PE=1 SV=2	1	1	4.3	32.528	304	0	111.61	4665700	3143700	1522000	-1.50657	3.17734	4.68391	473
Q99614	Tetratricopeptide repeat protein 1	TTC1	sp|Q99614|TTC1_HUMAN Tetratricopeptide repeat protein 1 OS=Homo sapiens GN=TTC1 PE=1 SV=1	1	3	12	33.526	292	0	17.513	265680	178740	86939	-1.51328	-0.959192	0.55409	1192
Q92841	Probable ATP-dependent RNA helicase DDX17	DDX17	sp|Q92841|DDX17_HUMAN Probable ATP-dependent RNA helicase DDX17 OS=Homo sapiens GN=DDX17 PE=1 SV=2	1	16	27.3	80.272	729	0	216.31	3214600	2157900	1056700	-1.52301	2.6345	4.15751	1129
Q9Y224	UPF0568 protein C14orf166	C14orf166	sp|Q9Y224|CN166_HUMAN UPF0568 protein C14orf166 OS=Homo sapiens GN=C14orf166 PE=1 SV=1	1	1	8.2	28.068	244	0.0036603	6.328	357910	240160	117750	-1.5248	-0.533058	0.991741	1433
Q9UHJ3	Scm-like with four MBT domains protein 1	SFMBT1	sp|Q9UHJ3|SMBT1_HUMAN Scm-like with four MBT domains protein 1 OS=Homo sapiens GN=SFMBT1 PE=1 SV=2	1	1	1.8	98.14	866	0.0076869	6.0136	317570	212790	104780	-1.531	-0.707624	0.823378	1388
Q53EU6	Glycerol-3-phosphate acyltransferase 3	AGPAT9	sp|Q53EU6|GPAT3_HUMAN Glycerol-3-phosphate acyltransferase 3 OS=Homo sapiens GN=GPAT3 PE=1 SV=2	1	2	5.8	48.705	434	0.0016764	10.797	12880000	8518400	4361300	-1.58724	4.61546	6.2027	916
Q01844	RNA-binding protein EWS	EWSR1	sp|Q01844|EWS_HUMAN RNA-binding protein EWS OS=Homo sapiens GN=EWSR1 PE=1 SV=1	1	2	4.4	68.477	656	0.0008726	11.147	165930	109620	56314	-1.59212	-1.66454	-0.0724201	738
P62917	60S ribosomal protein L8	RPL8	sp|P62917|RL8_HUMAN 60S ribosomal protein L8 OS=Homo sapiens GN=RPL8 PE=1 SV=2	1	3	13.6	28.024	257	0	43.608	3563400	2346000	1217500	-1.60679	2.75508	4.36186	695
P01857	Ig gamma-1 chain C region	IGHG1	sp|P01857|IGHG1_HUMAN Ig gamma-1 chain C region OS=Homo sapiens GN=IGHG1 PE=1 SV=1	1	1	3.6	36.105	330	0.0036311	6.2726	250210	164390	85821	-1.61535	-1.07993	0.535418	248
Q71DI3;Q16695;P84243;P68431;Q5TEC6;Q6NXT2	Histone H3.2;Histone H3.1t;Histone H3.3;Histone H3.1;Histone H3;Histone H3.3C	HIST2H3A;HIST3H3;H3F3A;HIST1H3A;HIST2H3PS2;H3F3C	sp|Q71DI3|H32_HUMAN Histone H3.2 OS=Homo sapiens GN=HIST2H3A PE=1 SV=3;sp|Q16695|H31T_HUMAN Histone H3.1t OS=Homo sapiens GN=HIST3H3 PE=1 SV=3;sp|P84243|H33_HUMAN Histone H3.3 OS=Homo sapiens GN=H3F3A PE=1 SV=2;sp|P68431|H31_HUMAN Histone H3.1 OS=Homo sapi	6	2	10.3	15.388	136	0	18.835	23270000	15263000	8007400	-1.62244	5.45684	7.07928	711
Q9NZI8;O00425	Insulin-like growth factor 2 mRNA-binding protein 1	IGF2BP1	sp|Q9NZI8|IF2B1_HUMAN Insulin-like growth factor 2 mRNA-binding protein 1 OS=Homo sapiens GN=IGF2BP1 PE=1 SV=2	2	7	13.7	63.48	577	0	56.231	1536400	1007700	528730	-1.6226	1.53594	3.15854	1353
Q15019	Septin-2	2002-09-01	sp|Q15019|SEPT2_HUMAN Septin-2 OS=Homo sapiens GN=SEPT2 PE=1 SV=1	1	6	23.5	41.487	361	0	58.68	1407500	922950	484530	-1.6234	1.4092	3.0326	859
P34741	Syndecan-2	SDC2	sp|P34741|SDC2_HUMAN Syndecan-2 OS=Homo sapiens GN=SDC2 PE=1 SV=2	1	1	7.5	22.16	201	0.0022305	6.4345	268550	175950	92602	-1.62702	-0.981888	0.64513	470
P11142;P54652	Heat shock cognate 71 kDa protein	HSPA8	sp|P11142|HSP7C_HUMAN Heat shock cognate 71 kDa protein OS=Homo sapiens GN=HSPA8 PE=1 SV=1	2	40	57.9	70.897	646	0	323.31	419910000	274380000	145530000	-1.63821	9.62491	11.2631	321
P14618;P30613	Pyruvate kinase PKM	PKM	sp|P14618|KPYM_HUMAN Pyruvate kinase PKM OS=Homo sapiens GN=PKM PE=1 SV=4	2	8	18.5	57.936	531	0	68.132	2505100	1634200	870860	-1.64499	2.23346	3.87845	350
P04080	Cystatin-B	CSTB	sp|P04080|CYTB_HUMAN Cystatin-B OS=Homo sapiens GN=CSTB PE=1 SV=2	1	1	12.2	11.139	98	0.00091324	11.584	611080	398590	212490	-1.64556	0.197851	1.84341	255
Q9HB71	Calcyclin-binding protein	CACYBP	sp|Q9HB71|CYBP_HUMAN Calcyclin-binding protein OS=Homo sapiens GN=CACYBP PE=1 SV=2	1	2	13.6	26.21	228	0.00098522	12.675	662630	431710	230920	-1.6504	0.313009	1.96341	1295
P60660;P14649	Myosin light polypeptide 6	MYL6	sp|P60660|MYL6_HUMAN Myosin light polypeptide 6 OS=Homo sapiens GN=MYL6 PE=1 SV=2	2	4	34.4	16.93	151	0	30.184	1257500	818780	438680	-1.65276	1.23642	2.88918	636
P63104	14-3-3 protein zeta/delta	YWHAZ	sp|P63104|1433Z_HUMAN 14-3-3 protein zeta/delta OS=Homo sapiens GN=YWHAZ PE=1 SV=1	1	9	39.2	27.745	245	0	151.25	5425700	3520300	1905400	-1.66746	3.34057	5.00804	698
Q15365;P57723	Poly(rC)-binding protein 1	PCBP1	sp|Q15365|PCBP1_HUMAN Poly(rC)-binding protein 1 OS=Homo sapiens GN=PCBP1 PE=1 SV=2	2	8	30.6	37.497	356	0	66.451	4213500	2727600	1486000	-1.67687	2.97251	4.64938	876
Q9Y3F4	Serine-threonine kinase receptor-associated protein	STRAP	sp|Q9Y3F4|STRAP_HUMAN Serine-threonine kinase receptor-associated protein OS=Homo sapiens GN=STRAP PE=1 SV=1	1	11	40	38.438	350	0	80.91	2315500	1494200	821310	-1.68969	2.10425	3.79394	1455
Q15717	ELAV-like protein 1	ELAVL1	sp|Q15717|ELAV1_HUMAN ELAV-like protein 1 OS=Homo sapiens GN=ELAVL1 PE=1 SV=2	1	3	11.7	36.091	326	0	19.324	345800	223120	122680	-1.69015	-0.639235	1.05091	892
Q15366;P57721	Poly(rC)-binding protein 2;Poly(rC)-binding protein 3	PCBP2;PCBP3	sp|Q15366|PCBP2_HUMAN Poly(rC)-binding protein 2 OS=Homo sapiens GN=PCBP2 PE=1 SV=1;sp|P57721|PCBP3_HUMAN Poly(rC)-binding protein 3 OS=Homo sapiens GN=PCBP3 PE=2 SV=2	2	8	27.4	38.58	365	0	214.38	9017200	5811800	3205400	-1.69459	4.06386	5.75845	877
Q14331	Protein FRG1	FRG1	sp|Q14331|FRG1_HUMAN Protein FRG1 OS=Homo sapiens GN=FRG1 PE=1 SV=1	1	1	5	29.172	258	0.0015686	7.2798	280960	180930	100020	-1.69792	-0.941622	0.756302	838
Q14240	Eukaryotic initiation factor 4A-II;Eukaryotic initiation factor 4A-II, N-terminally processed	EIF4A2	sp|Q14240|IF4A2_HUMAN Eukaryotic initiation factor 4A-II OS=Homo sapiens GN=EIF4A2 PE=1 SV=2	1	9	24.3	46.402	407	0.0090153	5.9916	98655	63521	35134	-1.6987	-2.45175	-0.753046	833
Q15417;Q99439	Calponin-3	CNN3	sp|Q15417|CNN3_HUMAN Calponin-3 OS=Homo sapiens GN=CNN3 PE=1 SV=1	2	4	14.9	36.413	329	0	26.01	590900	379990	210920	-1.7038	0.128908	1.83271	882
Q9H2U2	Inorganic pyrophosphatase 2, mitochondrial	PPA2	sp|Q9H2U2|IPYR2_HUMAN Inorganic pyrophosphatase 2, mitochondrial OS=Homo sapiens GN=PPA2 PE=1 SV=2	1	3	12.3	37.92	334	0	25.734	436630	278680	157960	-1.73402	-0.318445	1.41557	1271
P13797;Q14651	Plastin-3	PLS3	sp|P13797|PLST_HUMAN Plastin-3 OS=Homo sapiens GN=PLS3 PE=1 SV=4	2	4	7.8	70.81	630	0	24.117	246700	157060	89636	-1.7439	-1.14574	0.598164	344
P04083	Annexin A1	ANXA1	sp|P04083|ANXA1_HUMAN Annexin A1 OS=Homo sapiens GN=ANXA1 PE=1 SV=2	1	2	6.9	38.714	346	0	19.048	342060	217500	124560	-1.74889	-0.676039	1.07285	256
Q9BRJ7	Protein syndesmos	NUDT16L1	sp|Q9BRJ7|SDOS_HUMAN Protein syndesmos OS=Homo sapiens GN=NUDT16L1 PE=1 SV=1	1	5	29.4	23.338	211	0	32.204	1002800	637240	365540	-1.75126	0.874783	2.62604	1217
Q5T9A4	ATPase family AAA domain-containing protein 3B	ATAD3B	sp|Q5T9A4|ATD3B_HUMAN ATPase family AAA domain-containing protein 3B OS=Homo sapiens GN=ATAD3B PE=1 SV=1	1	15	24.5	72.572	648	0	81.69	1898200	1201700	696530	-1.76625	1.78995	3.5562	938
P35268	60S ribosomal protein L22	RPL22	sp|P35268|RL22_HUMAN 60S ribosomal protein L22 OS=Homo sapiens GN=RPL22 PE=1 SV=2	1	2	18.8	14.787	128	0.001046	15.925	4076600	2571300	1505400	-1.78072	2.88737	4.66809	477
Q9ULM3	YEATS domain-containing protein 2	YEATS2	sp|Q9ULM3|YETS2_HUMAN YEATS domain-containing protein 2 OS=Homo sapiens GN=YEATS2 PE=1 SV=2	1	2	1.7	150.78	1422	0.00089286	11.379	41000	25764	15236	-1.7952	-3.75363	-1.95843	1410
P04075	Fructose-bisphosphate aldolase A	ALDOA	sp|P04075|ALDOA_HUMAN Fructose-bisphosphate aldolase A OS=Homo sapiens GN=ALDOA PE=1 SV=2	1	5	19.8	39.42	364	0	67.14	1078500	675940	402560	-1.80538	0.959841	2.76522	254
P21796	Voltage-dependent anion-selective channel protein 1	VDAC1	sp|P21796|VDAC1_HUMAN Voltage-dependent anion-selective channel protein 1 OS=Homo sapiens GN=VDAC1 PE=1 SV=2	1	6	27.2	30.772	283	0	40.918	1966700	1231900	734820	-1.80765	1.82576	3.63341	392
P07910;P0DMR1;O60812;B7ZW38;B2RXH8	Heterogeneous nuclear ribonucleoproteins C1/C2	HNRNPC	sp|P07910|HNRPC_HUMAN Heterogeneous nuclear ribonucleoproteins C1/C2 OS=Homo sapiens GN=HNRNPC PE=1 SV=4	5	6	23.2	33.67	306	0	53.357	2711700	1689300	1022400	-1.8286	2.2813	4.1099	295
Q04323	UBX domain-containing protein 1	UBXN1	sp|Q04323|UBXN1_HUMAN UBX domain-containing protein 1 OS=Homo sapiens GN=UBXN1 PE=1 SV=2	1	5	28.3	33.325	297	0	114.42	1782300	1107300	674990	-1.83896	1.67192	3.51088	747
Q06830	Peroxiredoxin-1	PRDX1	sp|Q06830|PRDX1_HUMAN Peroxiredoxin-1 OS=Homo sapiens GN=PRDX1 PE=1 SV=1	1	15	63.3	22.11	199	0	177.59	41369000	25617000	15752000	-1.8515	6.2039	8.0554	756
P23284	Peptidyl-prolyl cis-trans isomerase B	PPIB	sp|P23284|PPIB_HUMAN Peptidyl-prolyl cis-trans isomerase B OS=Homo sapiens GN=PPIB PE=1 SV=2	1	1	6	23.742	216	0.0016194	8.2813	646480	398720	247760	-1.86663	0.198322	2.06496	405
P62857	40S ribosomal protein S28	RPS28	sp|P62857|RS28_HUMAN 40S ribosomal protein S28 OS=Homo sapiens GN=RPS28 PE=1 SV=1	1	1	17.4	7.8409	69	0.00089366	11.379	4048700	2471900	1576800	-1.90445	2.83049	4.73494	688
P08865	40S ribosomal protein SA	RPSA	sp|P08865|RSSA_HUMAN 40S ribosomal protein SA OS=Homo sapiens GN=RPSA PE=1 SV=4	1	7	30.8	32.854	295	0	172.64	5388300	3279000	2109200	-1.91651	3.23813	5.15464	302
P62273	40S ribosomal protein S29	RPS29	sp|P62273|RS29_HUMAN 40S ribosomal protein S29 OS=Homo sapiens GN=RPS29 PE=1 SV=2	1	1	19.6	6.6767	56	0.001586	7.4915	7821900	4756100	3065800	-1.91955	3.77465	5.69421	670
Q9Y520	Protein PRRC2C	PRRC2C	sp|Q9Y520|PRC2C_HUMAN Protein PRRC2C OS=Homo sapiens GN=PRRC2C PE=1 SV=4	1	4	1.9	316.91	2896	0	23.126	65816	39908	25907	-1.92973	-3.1223	-1.19257	1471
Q59GN2;P62891	Putative 60S ribosomal protein L39-like 5;60S ribosomal protein L39	RPL39P5;RPL39	sp|Q59GN2|R39L5_HUMAN Putative 60S ribosomal protein L39-like 5 OS=Homo sapiens GN=RPL39P5 PE=5 SV=2;sp|P62891|RL39_HUMAN 60S ribosomal protein L39 OS=Homo sapiens GN=RPL39 PE=1 SV=2	2	1	19.6	6.3225	51	0.0016247	8.5225	6618100	3985500	2632600	-1.9548	3.51963	5.47443	691
Q9HA64	Ketosamine-3-kinase	FN3KRP	sp|Q9HA64|KT3K_HUMAN Ketosamine-3-kinase OS=Homo sapiens GN=FN3KRP PE=1 SV=2	1	7	25.9	34.412	309	0	67.689	3651400	2185400	1466000	-1.97706	2.65277	4.62983	1293
P17844	Probable ATP-dependent RNA helicase DDX5	DDX5	sp|P17844|DDX5_HUMAN Probable ATP-dependent RNA helicase DDX5 OS=Homo sapiens GN=DDX5 PE=1 SV=1	1	16	27.7	69.147	614	0	81.203	2202000	1313500	888510	-1.98911	1.91829	3.9074	370
P61626	Lysozyme C	LYZ	sp|P61626|LYSC_HUMAN Lysozyme C OS=Homo sapiens GN=LYZ PE=1 SV=1	1	2	13.5	16.537	148	0	28.325	7407800	4403700	3004200	-2.00133	3.66359	5.66492	652
P62081	40S ribosomal protein S7	RPS7	sp|P62081|RS7_HUMAN 40S ribosomal protein S7 OS=Homo sapiens GN=RPS7 PE=1 SV=1	1	4	27.3	22.127	194	0	50.812	6811600	4004300	2807300	-2.0407	3.52642	5.56713	658
P02545	Prelamin-A/C;Lamin-A/C	LMNA	sp|P02545|LMNA_HUMAN Prelamin-A/C OS=Homo sapiens GN=LMNA PE=1 SV=1	1	6	9.8	74.139	664	0	35.58	502880	294170	208710	-2.05792	-0.240404	1.81751	251
P36578	60S ribosomal protein L4	RPL4	sp|P36578|RL4_HUMAN 60S ribosomal protein L4 OS=Homo sapiens GN=RPL4 PE=1 SV=5	1	4	11.7	47.697	427	0	25.8	1220400	710750	509690	-2.07335	1.03229	3.10563	488
Q92572	AP-3 complex subunit sigma-1	AP3S1	sp|Q92572|AP3S1_HUMAN AP-3 complex subunit sigma-1 OS=Homo sapiens GN=AP3S1 PE=1 SV=1	1	2	11.9	21.732	193	0.0008673	11.111	546650	315110	231540	-2.10847	-0.141199	1.96728	1121
Q00341	Vigilin	HDLBP	sp|Q00341|VIGLN_HUMAN Vigilin OS=Homo sapiens GN=HDLBP PE=1 SV=2	1	12	11.8	141.45	1268	0	91.227	1004800	578980	425810	-2.10976	0.73646	2.84622	725
P51114;P51116;Q06787	Fragile X mental retardation syndrome-related protein 1;Fragile X mental retardation syndrome-related protein 2	FXR1;FXR2	sp|P51114|FXR1_HUMAN Fragile X mental retardation syndrome-related protein 1 OS=Homo sapiens GN=FXR1 PE=1 SV=3;sp|P51116|FXR2_HUMAN Fragile X mental retardation syndrome-related protein 2 OS=Homo sapiens GN=FXR2 PE=1 SV=2	3	3	4.2	69.72	621	0	17.585	329360	188860	140500	-2.12632	-0.879736	1.24658	577
P12814;O43707;Q08043;P35609	Alpha-actinin-1;Alpha-actinin-4;Alpha-actinin-3	ACTN1;ACTN4;ACTN3	sp|P12814|ACTN1_HUMAN Alpha-actinin-1 OS=Homo sapiens GN=ACTN1 PE=1 SV=2;sp|O43707|ACTN4_HUMAN Alpha-actinin-4 OS=Homo sapiens GN=ACTN4 PE=1 SV=2;sp|Q08043|ACTN3_HUMAN Alpha-actinin-3 OS=Homo sapiens GN=ACTN3 PE=1 SV=2	4	3	3.8	103.06	892	0	20.644	254680	145750	108930	-2.13297	-1.25356	0.879416	135
P63261	Actin, cytoplasmic 2;Actin, cytoplasmic 2, N-terminally processed	ACTG1	sp|P63261|ACTG_HUMAN Actin, cytoplasmic 2 OS=Homo sapiens GN=ACTG1 PE=1 SV=1	1	18	60	41.792	375	0	323.31	57801000	32714000	25087000	-2.1701	6.55671	8.72681	704
P61978	Heterogeneous nuclear ribonucleoprotein K	HNRNPK	sp|P61978|HNRPK_HUMAN Heterogeneous nuclear ribonucleoprotein K OS=Homo sapiens GN=HNRNPK PE=1 SV=1	1	6	18.6	50.976	463	0	70.328	2828600	1600300	1228300	-2.17139	2.20322	4.37461	656
P15880	40S ribosomal protein S2	RPS2	sp|P15880|RS2_HUMAN 40S ribosomal protein S2 OS=Homo sapiens GN=RPS2 PE=1 SV=2	1	5	20.8	31.324	293	0	51.941	1694300	950140	744190	-2.2006	1.45109	3.65169	358
P55060	Exportin-2	CSE1L	sp|P55060|XPO2_HUMAN Exportin-2 OS=Homo sapiens GN=CSE1L PE=1 SV=3	1	12	15.2	110.42	971	0	80.251	3353800	1880600	1473200	-2.20083	2.43607	4.6369	616
Q5T440	Putative transferase CAF17, mitochondrial	IBA57	sp|Q5T440|CAF17_HUMAN Putative transferase CAF17, mitochondrial OS=Homo sapiens GN=IBA57 PE=1 SV=1	1	1	4.2	38.155	356	0.002259	6.5718	120370	66754	53616	-2.23688	-2.38013	-0.14325	935
Q00536;Q07002	Cyclin-dependent kinase 16;Cyclin-dependent kinase 18	CDK16;CDK18	sp|Q00536|CDK16_HUMAN Cyclin-dependent kinase 16 OS=Homo sapiens GN=CDK16 PE=1 SV=1;sp|Q07002|CDK18_HUMAN Cyclin-dependent kinase 18 OS=Homo sapiens GN=CDK18 PE=1 SV=3	2	3	5.8	55.715	496	0.00089928	11.429	174510	96092	78417	-2.25982	-1.85457	0.405252	726
A0A087WZY1;P02810	Salivary acidic proline-rich phosphoprotein 1/2;Salivary acidic proline-rich phosphoprotein 1/2;Salivary acidic proline-rich phosphoprotein 3/4;Peptide P-C	PRH1	tr|A0A087WZY1|A0A087WZY1_HUMAN Uncharacterized protein OS=Homo sapiens PE=4 SV=1;sp|P02810|PRPC_HUMAN Salivary acidic proline-rich phosphoprotein 1/2 OS=Homo sapiens GN=PRH1 PE=1 SV=2	2	2	22.3	27.91	265	0	17.103	7582000	4119400	3462600	-2.30249	3.56731	5.8698	3
P07355;A6NMY6	Annexin A2;Putative annexin A2-like protein	ANXA2;ANXA2P2	sp|P07355|ANXA2_HUMAN Annexin A2 OS=Homo sapiens GN=ANXA2 PE=1 SV=2;sp|A6NMY6|AXA2L_HUMAN Putative annexin A2-like protein OS=Homo sapiens GN=ANXA2P2 PE=5 SV=2	2	11	38.1	38.604	339	0	159.59	4637100	2486900	2150200	-2.34319	2.83922	5.18241	290
Q14679	Tubulin polyglutamylase TTLL4	TTLL4	sp|Q14679|TTLL4_HUMAN Tubulin polyglutamylase TTLL4 OS=Homo sapiens GN=TTLL4 PE=1 SV=2	1	3	3.3	133.38	1199	0	16.771	595970	318250	277720	-2.35654	-0.126894	2.22964	848
P50454	Serpin H1	SERPINH1	sp|P50454|SERPH_HUMAN Serpin H1 OS=Homo sapiens GN=SERPINH1 PE=1 SV=2	1	1	2.6	46.44	418	0.0022371	6.4732	201460	107150	94306	-2.36886	-1.69742	0.671436	569
P43487	Ran-specific GTPase-activating protein	RANBP1	sp|P43487|RANG_HUMAN Ran-specific GTPase-activating protein OS=Homo sapiens GN=RANBP1 PE=1 SV=1	1	4	32.3	23.31	201	0	27.48	1990400	1040800	949550	-2.42069	1.58257	4.00326	525
E9PAV3;Q9BZK3	Nascent polypeptide-associated complex subunit alpha, muscle-specific form	NACA	sp|E9PAV3|NACAM_HUMAN Nascent polypeptide-associated complex subunit alpha, muscle-specific form OS=Homo sapiens GN=NACA PE=1 SV=1	2	4	2.6	205.42	2078	0	207.9	345170	180180	164990	-2.42601	-0.947615	1.47839	61
Q96H79	Zinc finger CCCH-type antiviral protein 1-like	ZC3HAV1L	sp|Q96H79|ZCCHL_HUMAN Zinc finger CCCH-type antiviral protein 1-like OS=Homo sapiens GN=ZC3HAV1L PE=1 SV=2	1	1	4.3	32.962	300	0.0016529	9.6477	214030	110770	103270	-2.45192	-1.64949	0.802435	1165
P07237	Protein disulfide-isomerase	P4HB	sp|P07237|PDIA1_HUMAN Protein disulfide-isomerase OS=Homo sapiens GN=P4HB PE=1 SV=3	1	4	8.3	57.116	508	0	28.512	661370	337010	324370	-2.49792	-0.0442619	2.45366	288
Q96Q15	Serine/threonine-protein kinase SMG1	SMG1	sp|Q96Q15|SMG1_HUMAN Serine/threonine-protein kinase SMG1 OS=Homo sapiens GN=SMG1 PE=1 SV=3	1	8	2.5	410.5	3661	0	48.761	135700	68981	66719	-2.50497	-2.33278	0.172184	1175
P84090	Enhancer of rudimentary homolog	ERH	sp|P84090|ERH_HUMAN Enhancer of rudimentary homolog OS=Homo sapiens GN=ERH PE=1 SV=1	1	1	10.6	12.259	104	0	146.89	1571300	798710	772560	-2.50504	1.20062	3.70566	722
P46782	40S ribosomal protein S5;40S ribosomal protein S5, N-terminally processed	RPS5	sp|P46782|RS5_HUMAN 40S ribosomal protein S5 OS=Homo sapiens GN=RPS5 PE=1 SV=4	1	2	11.8	22.876	204	0	34.93	9923100	5006400	4916700	-2.52699	3.84865	6.37563	538
O95757	Heat shock 70 kDa protein 4L	HSPA4L	sp|O95757|HS74L_HUMAN Heat shock 70 kDa protein 4L OS=Homo sapiens GN=HSPA4L PE=1 SV=3	1	17	25.9	94.511	839	0	145.52	1435700	718360	717360	-2.55106	1.04765	3.59871	228
P16403;P10412;P16402;P22492;Q02539	Histone H1.2;Histone H1.4;Histone H1.3	HIST1H1C;HIST1H1E;HIST1H1D	sp|P16403|H12_HUMAN Histone H1.2 OS=Homo sapiens GN=HIST1H1C PE=1 SV=2;sp|P10412|H14_HUMAN Histone H1.4 OS=Homo sapiens GN=HIST1H1E PE=1 SV=2;sp|P16402|H13_HUMAN Histone H1.3 OS=Homo sapiens GN=HIST1H1D PE=1 SV=2	5	5	23	21.364	213	0	31.743	9009200	4500500	4508600	-2.55566	3.69496	6.25062	362
P62277	40S ribosomal protein S13	RPS13	sp|P62277|RS13_HUMAN 40S ribosomal protein S13 OS=Homo sapiens GN=RPS13 PE=1 SV=2	1	4	26.5	17.222	151	0	43.374	7212300	3601800	3610500	-2.55655	3.37359	5.93014	671
O14523	C2 domain-containing protein 2-like	C2CD2L	sp|O14523|C2C2L_HUMAN C2 domain-containing protein 2-like OS=Homo sapiens GN=C2CD2L PE=1 SV=3	1	1	1.4	76.18	706	0.0090215	5.9916	10976000	5437900	5538400	-2.57949	3.96792	6.54741	83
P22234	Multifunctional protein ADE2;Phosphoribosylaminoimidazole-succinocarboxamide synthase;Phosphoribosylaminoimidazole carboxylase	PAICS	sp|P22234|PUR6_HUMAN Multifunctional protein ADE2 OS=Homo sapiens GN=PAICS PE=1 SV=3	1	6	20.5	47.079	425	0	38.255	714000	348550	365450	-2.62138	0.00431252	2.62569	398
P17066;P48741	Heat shock 70 kDa protein 6	HSPA6	sp|P17066|HSP76_HUMAN Heat shock 70 kDa protein 6 OS=Homo sapiens GN=HSPA6 PE=1 SV=2	2	31	48.5	71.027	643	0	323.31	136560000	66569000	69991000	-2.62539	7.58165	10.207	366
Q96HC4	PDZ and LIM domain protein 5	PDLIM5	sp|Q96HC4|PDLI5_HUMAN PDZ and LIM domain protein 5 OS=Homo sapiens GN=PDLIM5 PE=1 SV=5	1	5	11.1	63.944	596	0	29.845	444160	216450	227710	-2.62623	-0.68302	1.94321	1166
P34932	Heat shock 70 kDa protein 4	HSPA4	sp|P34932|HSP74_HUMAN Heat shock 70 kDa protein 4 OS=Homo sapiens GN=HSPA4 PE=1 SV=4	1	29	40.8	94.33	840	0	323.31	6049000	2884300	3164700	-2.68692	3.05309	5.74001	472
P22626	Heterogeneous nuclear ribonucleoproteins A2/B1	HNRNPA2B1	sp|P22626|ROA2_HUMAN Heterogeneous nuclear ribonucleoproteins A2/B1 OS=Homo sapiens GN=HNRNPA2B1 PE=1 SV=2	1	5	18.7	37.429	353	0	40.623	1807800	842120	965690	-2.7506	1.27697	4.02757	401
Q16777;Q6FI13	Histone H2A type 2-C;Histone H2A type 2-A	HIST2H2AC;HIST2H2AA3	sp|Q16777|H2A2C_HUMAN Histone H2A type 2-C OS=Homo sapiens GN=HIST2H2AC PE=1 SV=4;sp|Q6FI13|H2A2A_HUMAN Histone H2A type 2-A OS=Homo sapiens GN=HIST2H2AA3 PE=1 SV=3	2	4	49.6	13.988	129	0	53.124	12669000	5884100	6784400	-2.75847	4.0817	6.84016	904
P09382	Galectin-1	LGALS1	sp|P09382|LEG1_HUMAN Galectin-1 OS=Homo sapiens GN=LGALS1 PE=1 SV=2	1	2	14.8	14.716	135	0.00094697	11.879	3756200	1728700	2027500	-2.78308	2.31456	5.09764	304
P62805	Histone H4	HIST1H4A	sp|P62805|H4_HUMAN Histone H4 OS=Homo sapiens GN=HIST1H4A PE=1 SV=2	1	6	57.3	11.367	103	0	73.014	105030000	48283000	56752000	-2.78622	7.11832	9.90454	682
P0DMV9;P0DMV8	Heat shock 70 kDa protein 1B;Heat shock 70 kDa protein 1A	HSPA1B;HSPA1A	sp|P0DMV9|HS71B_HUMAN Heat shock 70 kDa protein 1B OS=Homo sapiens GN=HSPA1B PE=1 SV=1;sp|P0DMV8|HS71A_HUMAN Heat shock 70 kDa protein 1A OS=Homo sapiens GN=HSPA1A PE=1 SV=1	2	43	69	70.051	641	0	323.31	2857700000	1311100000	1546700000	-2.79148	11.8814	14.6729	312
Q13162	Peroxiredoxin-4	PRDX4	sp|Q13162|PRDX4_HUMAN Peroxiredoxin-4 OS=Homo sapiens GN=PRDX4 PE=1 SV=1	1	9	38.4	30.54	271	0	50.954	2979000	1366400	1612600	-2.79208	1.97525	4.76733	793
Q15084	Protein disulfide-isomerase A6	PDIA6	sp|Q15084|PDIA6_HUMAN Protein disulfide-isomerase A6 OS=Homo sapiens GN=PDIA6 PE=1 SV=1	1	3	8.9	48.121	440	0	18.421	368400	168620	199780	-2.7977	-1.04328	1.75443	868
P08670;P41219;P17661	Vimentin	VIM	sp|P08670|VIME_HUMAN Vimentin OS=Homo sapiens GN=VIM PE=1 SV=4	3	21	50.4	53.651	466	0	294.41	16459000	7425300	9034100	-2.836	4.41732	7.25332	301
Q99661;Q8N4N8	Kinesin-like protein KIF2C	KIF2C	sp|Q99661|KIF2C_HUMAN Kinesin-like protein KIF2C OS=Homo sapiens GN=KIF2C PE=1 SV=2	2	3	4.8	81.312	725	0	22.936	266180	119340	146840	-2.85224	-1.54198	1.31026	1196
Q8N5C8	TGF-beta-activated kinase 1 and MAP3K7-binding protein 3	TAB3	sp|Q8N5C8|TAB3_HUMAN TGF-beta-activated kinase 1 and MAP3K7-binding protein 3 OS=Homo sapiens GN=TAB3 PE=1 SV=2	1	1	1.1	78.682	712	0.00089127	11.366	8150500	3510000	4640500	-2.95588	3.33635	6.29222	1056
Q99880;Q99879;Q99877;Q93079;Q5QNW6;P62807;P58876;P57053;O60814;Q16778;P33778;P23527;P06899;Q8N257;Q96A08	Histone H2B type 1-L;Histone H2B type 1-M;Histone H2B type 1-N;Histone H2B type 1-H;Histone H2B type 2-F;Histone H2B type 1-C/E/F/G/I;Histone H2B type 1-D;Histone H2B type F-S;Histone H2B type 1-K;Histone H2B type 2-E;Histone H2B type 1-B;Histone H2B type 1-O;Histone H2B type 1-J;Histone H2B type 3-B;Histone H2B type 1-A	HIST1H2BL;HIST1H2BM;HIST1H2BN;HIST1H2BH;HIST2H2BF;HIST1H2BC;HIST1H2BD;H2BFS;HIST1H2BK;HIST2H2BE;HIST1H2BB;HIST1H2BO;HIST1H2BJ;HIST3H2BB;HIST1H2BA	sp|Q99880|H2B1L_HUMAN Histone H2B type 1-L OS=Homo sapiens GN=HIST1H2BL PE=1 SV=3;sp|Q99879|H2B1M_HUMAN Histone H2B type 1-M OS=Homo sapiens GN=HIST1H2BM PE=1 SV=3;sp|Q99877|H2B1N_HUMAN Histone H2B type 1-N OS=Homo sapiens GN=HIST1H2BN PE=1 SV=3;sp|Q93079|	15	6	41.3	13.952	126	0	159.86	83489000	35570000	47918000	-2.98298	6.67746	9.66044	159
P39019	40S ribosomal protein S19	RPS19	sp|P39019|RS19_HUMAN 40S ribosomal protein S19 OS=Homo sapiens GN=RPS19 PE=1 SV=2	1	1	6.2	16.06	145	0.0022321	6.4358	533970	227050	306920	-2.98792	-0.614044	2.37388	496
A0A0U1RRH7;Q99878;Q96KK5;Q9BTM1;Q93077;Q7L7L0;P20671;P0C0S8;P04908;P16104;Q71UI9;P0C0S5;Q8IUE6;Q96QV6	Histone H2A type 1-J;Histone H2A type 1-H;Histone H2A.J;Histone H2A type 1-C;Histone H2A type 3;Histone H2A type 1-D;Histone H2A type 1;Histone H2A type 1-B/E;Histone H2AX;Histone H2A.V;Histone H2A.Z;Histone H2A type 2-B;Histone H2A type 1-A	HIST1H2AJ;HIST1H2AH;H2AFJ;HIST1H2AC;HIST3H2A;HIST1H2AD;HIST1H2AG;HIST1H2AB;H2AFX;H2AFV;H2AFZ;HIST2H2AB;HIST1H2AA	tr|A0A0U1RRH7|A0A0U1RRH7_HUMAN Histone H2A OS=Homo sapiens PE=3 SV=1;sp|Q99878|H2A1J_HUMAN Histone H2A type 1-J OS=Homo sapiens GN=HIST1H2AJ PE=1 SV=3;sp|Q96KK5|H2A1H_HUMAN Histone H2A type 1-H OS=Homo sapiens GN=HIST1H2AH PE=1 SV=3;sp|Q9BTM1|H2AJ_HUMAN Hi	14	4	37.6	18.552	170	0	207.18	79907000	33215000	46692000	-3.04441	6.57864	9.62304	6
P09651;Q32P51	Heterogeneous nuclear ribonucleoprotein A1;Heterogeneous nuclear ribonucleoprotein A1, N-terminally processed;Heterogeneous nuclear ribonucleoprotein A1-like 2	HNRNPA1;HNRNPA1L2	sp|P09651|ROA1_HUMAN Heterogeneous nuclear ribonucleoprotein A1 OS=Homo sapiens GN=HNRNPA1 PE=1 SV=5;sp|Q32P51|RA1L2_HUMAN Heterogeneous nuclear ribonucleoprotein A1-like 2 OS=Homo sapiens GN=HNRNPA1L2 PE=2 SV=2	2	4	12.1	38.746	372	0	39.52	817200	332870	484340	-3.09413	-0.0620956	3.03203	305
Q8N163	Cell cycle and apoptosis regulator protein 2	CCAR2	sp|Q8N163|CCAR2_HUMAN Cell cycle and apoptosis regulator protein 2 OS=Homo sapiens GN=CCAR2 PE=1 SV=2	1	9	10.9	102.9	923	0	65.2	1563200	629150	934050	-3.12316	0.85635	3.97951	1049
P14174	Macrophage migration inhibitory factor	MIF	sp|P14174|MIF_HUMAN Macrophage migration inhibitory factor OS=Homo sapiens GN=MIF PE=1 SV=4	1	1	9.6	12.476	115	0.0016447	9.2019	1036600	394910	641710	-3.25347	0.184469	3.43793	347
Q9NWB6	Arginine and glutamate-rich protein 1	ARGLU1	sp|Q9NWB6|ARGL1_HUMAN Arginine and glutamate-rich protein 1 OS=Homo sapiens GN=ARGLU1 PE=1 SV=1	1	1	2.9	33.216	273	0.0015723	7.3131	15349000	5787400	9561900	-3.27745	4.05779	7.33524	1338
P40926	Malate dehydrogenase, mitochondrial	MDH2	sp|P40926|MDHM_HUMAN Malate dehydrogenase, mitochondrial OS=Homo sapiens GN=MDH2 PE=1 SV=3	1	2	7.1	35.503	338	0.0010341	14.398	1841500	664360	1177200	-3.37839	0.934912	4.3133	503
P51659	Peroxisomal multifunctional enzyme type 2;(3R)-hydroxyacyl-CoA dehydrogenase;Enoyl-CoA hydratase 2	HSD17B4	sp|P51659|DHB4_HUMAN Peroxisomal multifunctional enzyme type 2 OS=Homo sapiens GN=HSD17B4 PE=1 SV=3	1	8	14.5	79.685	736	0	66.279	718290	256600	461680	-3.40044	-0.437532	2.96291	584
P62888	60S ribosomal protein L30	RPL30	sp|P62888|RL30_HUMAN 60S ribosomal protein L30 OS=Homo sapiens GN=RPL30 PE=1 SV=2	1	1	10.4	12.784	115	0.0057143	6.1395	873620	301590	572040	-3.4766	-0.204466	3.27213	690
P07196;P12036	Neurofilament light polypeptide	NEFL	sp|P07196|NFL_HUMAN Neurofilament light polypeptide OS=Homo sapiens GN=NEFL PE=1 SV=3	2	10	16	61.516	543	0	37.736	1878000	624890	1253100	-3.5569	0.846548	4.40344	286
P00558	Phosphoglycerate kinase 1	PGK1	sp|P00558|PGK1_HUMAN Phosphoglycerate kinase 1 OS=Homo sapiens GN=PGK1 PE=1 SV=3	1	1	2.9	44.614	417	0.0022189	6.4127	990190	327390	662800	-3.57063	-0.0860443	3.48459	245
Q9UHD8	Septin-9	2009-09-01	sp|Q9UHD8|SEPT9_HUMAN Septin-9 OS=Homo sapiens GN=SEPT9 PE=1 SV=2	1	6	11.9	65.401	586	0	35.322	267800	83574	184230	-3.69345	-2.05593	1.63752	1386
P60709;Q9BYX7;Q562R1	Actin, cytoplasmic 1;Actin, cytoplasmic 1, N-terminally processed	ACTB	sp|P60709|ACTB_HUMAN Actin, cytoplasmic 1 OS=Homo sapiens GN=ACTB PE=1 SV=1	3	18	60	41.736	375	0.0016287	8.7591	195890	58139	137750	-3.79754	-2.57948	1.21807	637
Q9H0D6	5-3 exoribonuclease 2	XRN2	sp|Q9H0D6|XRN2_HUMAN 5-3 exoribonuclease 2 OS=Homo sapiens GN=XRN2 PE=1 SV=1	1	7	10.6	108.58	950	0	42.152	480300	135180	345120	-3.90528	-1.36217	2.54311	1265
Q8NHH1	Tubulin polyglutamylase TTLL11	TTLL11	sp|Q8NHH1|TTL11_HUMAN Tubulin polyglutamylase TTLL11 OS=Homo sapiens GN=TTLL11 PE=1 SV=2	1	1	1.1	87.611	800	0.0022472	6.5341	97974	26526	71448	-3.98255	-3.71157	0.270979	1080
P11532	Dystrophin	DMD	sp|P11532|DMD_HUMAN Dystrophin OS=Homo sapiens GN=DMD PE=1 SV=3	1	2	0.6	426.74	3685	0.0008643	11.098	288420	75341	213080	-4.05296	-2.20555	1.84741	327
P42695	Condensin-2 complex subunit D3	NCAPD3	sp|P42695|CNDD3_HUMAN Condensin-2 complex subunit D3 OS=Homo sapiens GN=NCAPD3 PE=1 SV=2	1	8	7.7	168.89	1498	0	71.988	1007000	261390	745630	-4.06532	-0.410851	3.65447	517
Q14103	Heterogeneous nuclear ribonucleoprotein D0	HNRNPD	sp|Q14103|HNRPD_HUMAN Heterogeneous nuclear ribonucleoprotein D0 OS=Homo sapiens GN=HNRNPD PE=1 SV=1	1	2	6.8	38.434	355	0.00090009	11.465	739720	191630	548080	-4.06913	-0.85873	3.2104	823
O95399	Urotensin-2	UTS2	sp|O95399|UTS2_HUMAN Urotensin-2 OS=Homo sapiens GN=UTS2 PE=1 SV=1	1	1	6.5	14.295	124	0.0015785	7.4285	15631000	4004700	11627000	-4.09078	3.52657	7.61735	219
O75369	Filamin-B	FLNB	sp|O75369|FLNB_HUMAN Filamin-B OS=Homo sapiens GN=FLNB PE=1 SV=2	1	15	8.2	278.16	2602	0	75.596	1171100	286570	884580	-4.17917	-0.278166	3.90101	175
P11021	78 kDa glucose-regulated protein	HSPA5	sp|P11021|GRP78_HUMAN 78 kDa glucose-regulated protein OS=Homo sapiens GN=HSPA5 PE=1 SV=2	1	35	48.3	72.332	654	0	323.31	63054000	15306000	47748000	-4.19441	5.4609	9.65531	320
P49368	T-complex protein 1 subunit gamma	CCT3	sp|P49368|TCPG_HUMAN T-complex protein 1 subunit gamma OS=Homo sapiens GN=CCT3 PE=1 SV=4	1	14	29.9	60.533	545	0	240.7	70544000	16687000	53857000	-4.24348	5.58553	9.829	556
Q15233	Non-POU domain-containing octamer-binding protein	NONO	sp|Q15233|NONO_HUMAN Non-POU domain-containing octamer-binding protein OS=Homo sapiens GN=NONO PE=1 SV=4	1	14	40.1	54.231	471	0	158.92	6484900	1505200	4979700	-4.27917	2.11483	6.394	873
Q9UHD1	Cysteine and histidine-rich domain-containing protein 1	CHORDC1	sp|Q9UHD1|CHRD1_HUMAN Cysteine and histidine-rich domain-containing protein 1 OS=Homo sapiens GN=CHORDC1 PE=1 SV=2	1	3	13.6	37.489	332	0	35.143	979700	218460	761240	-4.35405	-0.669685	3.68437	1385
P38646	Stress-70 protein, mitochondrial	HSPA9	sp|P38646|GRP75_HUMAN Stress-70 protein, mitochondrial OS=Homo sapiens GN=HSPA9 PE=1 SV=2	1	37	54.5	73.68	679	0	323.31	71120000	14442000	56677000	-4.52556	5.37707	9.90263	494
P51991	Heterogeneous nuclear ribonucleoprotein A3	HNRNPA3	sp|P51991|ROA3_HUMAN Heterogeneous nuclear ribonucleoprotein A3 OS=Homo sapiens GN=HNRNPA3 PE=1 SV=2	1	1	2.6	39.594	378	0.0015848	7.4754	87028	17405	69623	-4.55313	-4.31948	0.23365	588
CON__Q9U6Y5	GFP			1	18	58.2	28.106	249	0	323.31	67440000000	10844000000	56596000000	-4.93687	14.9295	19.8664	59
Q9Y5H7;Q9UN74	Protocadherin alpha-5;Protocadherin alpha-4	PCDHA5;PCDHA4	sp|Q9Y5H7|PCDA5_HUMAN Protocadherin alpha-5 OS=Homo sapiens GN=PCDHA5 PE=2 SV=1;sp|Q9UN74|PCDA4_HUMAN Protocadherin alpha-4 OS=Homo sapiens GN=PCDHA4 PE=1 SV=1	2	1	0.9	102.05	936	0.0022762	6.648	8644000	1041800	7602200	-5.42041	1.58395	7.00436	1418
P35573	Glycogen debranching enzyme;4-alpha-glucanotransferase;Amylo-alpha-1,6-glucosidase	AGL	sp|P35573|GDE_HUMAN Glycogen debranching enzyme OS=Homo sapiens GN=AGL PE=1 SV=3	1	2	2.1	174.76	1532	0.00088574	11.334	190230	21540	168690	-5.52235	-4.01196	1.51039	478
P11802;Q00535;Q00534;Q96Q40;O94921;Q9NYV4;Q14004	Cyclin-dependent kinase 4	CDK4	sp|P11802|CDK4_HUMAN Cyclin-dependent kinase 4 OS=Homo sapiens GN=CDK4 PE=1 SV=2	7	4	19.1	33.729	303	0	18.448	2517300	259110	2258200	-5.6766	-0.423489	5.25311	330
Q5H9K5	Zinc finger matrin-type protein 1	ZMAT1	sp|Q5H9K5|ZMAT1_HUMAN Zinc finger matrin-type protein 1 OS=Homo sapiens GN=ZMAT1 PE=2 SV=1	1	1	1.9	74.754	638	0.0022727	6.6441	5794300	495340	5298900	-5.97227	0.511366	6.48363	923
P23246	Splicing factor, proline- and glutamine-rich	SFPQ	sp|P23246|SFPQ_HUMAN Splicing factor, proline- and glutamine-rich OS=Homo sapiens GN=SFPQ PE=1 SV=2	1	19	36.1	76.149	707	0	323.31	10992000	817830	10174000	-6.19001	1.23475	7.42476	403
P39880	Homeobox protein cut-like 1	CUX1	sp|P39880|CUX1_HUMAN Homeobox protein cut-like 1 OS=Homo sapiens GN=CUX1 PE=1 SV=3	1	1	0.9	164.19	1505	0.0064194	6.124	5967000	303550	5663400	-6.77473	-0.19512	6.57961	499
A4D0S4	Laminin subunit beta-4	LAMB4	sp|A4D0S4|LAMB4_HUMAN Laminin subunit beta-4 OS=Homo sapiens GN=LAMB4 PE=2 SV=1	1	1	0.5	193.54	1761	0.0076602	6.0034	1273300	60772	1212500	-6.8715	-2.51558	4.35593	11
Q9BZJ4	Solute carrier family 25 member 39	SLC25A39	sp|Q9BZJ4|S2539_HUMAN Solute carrier family 25 member 39 OS=Homo sapiens GN=SLC25A39 PE=2 SV=2	1	1	3.3	39.248	359	0.0015674	7.2747	780900000	21710000	759190000	-7.6811	5.96516	13.6463	1249
Q9UPN3	Microtubule-actin cross-linking factor 1, isoforms 1/2/3/5	MACF1	sp|Q9UPN3|MACF1_HUMAN Microtubule-actin cross-linking factor 1, isoforms 1/2/3/5 OS=Homo sapiens GN=MACF1 PE=1 SV=4	1	6	1.2	838.3	7388	0	33.635	394400	9453.8	384950	-7.9007	-5.20002	2.70069	1425
Q12767	Uncharacterized protein KIAA0195	KIAA0195	sp|Q12767|TMM94_HUMAN Transmembrane protein 94 OS=Homo sapiens GN=TMEM94 PE=1 SV=1	1	1	1	151.15	1356	0.0057102	6.1372	965880	16001	949880	-8.44458	-4.44082	4.00376	775
Q0VDD8	Dynein heavy chain 14, axonemal	DNAH14	sp|Q0VDD8|DYH14_HUMAN Dynein heavy chain 14, axonemal OS=Homo sapiens GN=DNAH14 PE=2 SV=3	1	1	0.3	399.89	3507	0.0050179	6.1604	40653000	620750	40032000	-8.56407	0.836958	9.40102	771
Q9UGJ1	Gamma-tubulin complex component 4	TUBGCP4	sp|Q9UGJ1|GCP4_HUMAN Gamma-tubulin complex component 4 OS=Homo sapiens GN=TUBGCP4 PE=1 SV=1	1	2	4	76.088	667	0.00085837	11.051	5512300	81360	5430900	-8.6138	-2.09466	6.51913	1383
Q7Z4L5	Tetratricopeptide repeat protein 21B	TTC21B	sp|Q7Z4L5|TT21B_HUMAN Tetratricopeptide repeat protein 21B OS=Homo sapiens GN=TTC21B PE=1 SV=2	1	4	4.1	150.94	1316	0	24.209	88095000	1247200	86847000	-8.67478	1.84357	10.5183	1007
A0A087WUL8;Q6P3W6;Q3BBW0;Q3BBV2;B4DH59;Q5TI25;Q3BBV0;Q5TAG4;Q8N660;Q3BBV1	Neuroblastoma breakpoint family member 10;Neuroblastoma breakpoint family member 9;Putative neuroblastoma breakpoint family member 8;Neuroblastoma breakpoint family member 26;Neuroblastoma breakpoint family member 14;Neuroblastoma breakpoint family member 1;Neuroblastoma breakpoint family member 12;Neuroblastoma breakpoint family member 15;Neuroblastoma breakpoint family member 20	NBPF19;NBPF10;NBPF9;NBPF8;NBPF26;NBPF14;NBPF1;NBPF12;NBPF15;NBPF20	sp|A0A087WUL8|NBPFJ_HUMAN Neuroblastoma breakpoint family member 19 OS=Homo sapiens GN=NBPF19 PE=5 SV=1;sp|Q6P3W6|NBPFA_HUMAN Neuroblastoma breakpoint family member 10 OS=Homo sapiens GN=NBPF10 PE=2 SV=2;sp|Q3BBW0|NBPF9_HUMAN Neuroblastoma breakpoint famil	10	2	10.9	440.4	3843	0.00085616	11.018	13679	13679	0		-4.66702		0
Q8IZP1;Q6IPX1;Q6DHY5;P0C7X1;B9A6J9;A6NER0;A6NDS4;A0A087X1G2;A0A087WXS9;A0A087WVF3	TBC1 domain family member 3;TBC1 domain family member 3C;TBC1 domain family member 3G;TBC1 domain family member 3H;TBC1 domain family member 3L;TBC1 domain family member 3F;TBC1 domain family member 3B;TBC1 domain family member 3K;TBC1 domain family member 3I;TBC1 domain family member 3D	TBC1D3;TBC1D3C;TBC1D3G;TBC1D3H;TBC1D3L;TBC1D3F;TBC1D3B;TBC1D3K;TBC1D3I;TBC1D3D	sp|Q8IZP1|TBC3A_HUMAN TBC1 domain family member 3 OS=Homo sapiens GN=TBC1D3 PE=1 SV=6;sp|Q6IPX1|TBC3C_HUMAN TBC1 domain family member 3C OS=Homo sapiens GN=TBC1D3C PE=2 SV=3;sp|Q6DHY5|TBC3G_HUMAN TBC1 domain family member 3G OS=Homo sapiens GN=TBC1D3G PE=2	10	1	2.6	62.186	549	0.0064148	6.1216	1630600	0	1630600			4.78335	1
A0FGR8	Extended synaptotagmin-2	ESYT2	sp|A0FGR8|ESYT2_HUMAN Extended synaptotagmin-2 OS=Homo sapiens GN=ESYT2 PE=1 SV=1	1	2	2.4	102.36	921	0.0009901	12.78	56130	56130	0		-2.63021		8
D6RBM5;Q6QN14;Q7RTZ2;Q6R6M4;Q0WX57;D6RJB6;D6RCP7;D6RBQ6;D6RA61;D6R9N7;D6R901;C9JVI0;C9JPN9;C9JJH3;C9J2P7;A8MUK1;A6NCW7;A6NCW0	Putative ubiquitin carboxyl-terminal hydrolase 17-like protein 23;Ubiquitin carboxyl-terminal hydrolase 17-like protein 6;Ubiquitin carboxyl-terminal hydrolase 17-like protein 1;Ubiquitin carboxyl-terminal hydrolase 17;Ubiquitin carboxyl-terminal hydrolase 17-like protein 24;Ubiquitin carboxyl-terminal hydrolase 17-like protein 20;Ubiquitin carboxyl-terminal hydrolase 17-like protein 19;Ubiquitin…	USP17L23;USP17L6P;USP17L1;USP17L2;USP17L24;USP17L20;USP17L19;USP17L17;USP17L22;USP17L18;USP17L21;USP17L11;USP17L12;USP17L10;USP17L15;USP17L5;USP17L4;USP17L3	sp|D6RBM5|U17LN_HUMAN Putative ubiquitin carboxyl-terminal hydrolase 17-like protein 23 OS=Homo sapiens GN=USP17L23 PE=5 SV=1;sp|Q6QN14|U17L6_HUMAN Ubiquitin carboxyl-terminal hydrolase 17-like protein 6 OS=Homo sapiens GN=USP17L6P PE=1 SV=2;sp|Q7RTZ2|U17L	18	1	8.2	20.302	183	0.0023148	6.985	297030	297030	0		-0.226446		13
A6NFN3;O43251;Q9NWB1	RNA binding protein fox-1 homolog 3;RNA binding protein fox-1 homolog 2;RNA binding protein fox-1 homolog 1	RBFOX3;RBFOX2;RBFOX1	sp|A6NFN3|RFOX3_HUMAN RNA binding protein fox-1 homolog 3 OS=Homo sapiens GN=RBFOX3 PE=2 SV=4;sp|O43251|RFOX2_HUMAN RNA binding protein fox-1 homolog 2 OS=Homo sapiens GN=RBFOX2 PE=1 SV=3;sp|Q9NWB1|RFOX1_HUMAN RNA binding protein fox-1 homolog 1 OS=Homo sa	3	2	3.2	33.872	312	0.00093897	11.836	762430	762430	0		1.13355		14
A6NHL2	Tubulin alpha chain-like 3	TUBAL3	sp|A6NHL2|TBAL3_HUMAN Tubulin alpha chain-like 3 OS=Homo sapiens GN=TUBAL3 PE=1 SV=2	1	5	10.3	49.908	446	0	38.178	424620	424620	0		0.289118		15
C9JAW5;Q9Y241	HIG1 domain family member 1A, mitochondrial	HIGD1A	tr|C9JAW5|C9JAW5_HUMAN Uncharacterized protein OS=Homo sapiens PE=4 SV=1;sp|Q9Y241|HIG1A_HUMAN HIG1 domain family member 1A, mitochondrial OS=Homo sapiens GN=HIGD1A PE=1 SV=1	2	1	21.7	8.8131	83	0	34.126	471420	471420	0		0.439959		21
G3V3G9;Q5TAQ9	DDB1- and CUL4-associated factor 8	DCAF8	tr|G3V3G9|G3V3G9_HUMAN Uncharacterized protein OS=Homo sapiens PE=4 SV=1;sp|Q5TAQ9|DCAF8_HUMAN DDB1- and CUL4-associated factor 8 OS=Homo sapiens GN=DCAF8 PE=1 SV=1	2	3	4.7	84.752	751	0	18.737	113970	113970	0		-1.6084		63
H3BSU7;Q9Y320	Thioredoxin-related transmembrane protein 2	TMX2-CTNND1;TMX2	tr|H3BSU7|H3BSU7_HUMAN Protein TMX2-CTNND1 OS=Homo sapiens GN=TMX2-CTNND1 PE=4 SV=1;sp|Q9Y320|TMX2_HUMAN Thioredoxin-related transmembrane protein 2 OS=Homo sapiens GN=TMX2 PE=1 SV=1	2	1	14.6	11.615	103	0.0016051	7.757	316530	316530	0		-0.134712		64
I3L4J1;Q9UN37;O75351;Q6PIW4	Vacuolar protein sorting-associated protein 4A;Vacuolar protein sorting-associated protein 4B;Fidgetin-like protein 1	VPS4A;VPS4B;FIGNL1	tr|I3L4J1|I3L4J1_HUMAN Uncharacterized protein (Fragment) OS=Homo sapiens PE=1 SV=3;sp|Q9UN37|VPS4A_HUMAN Vacuolar protein sorting-associated protein 4A OS=Homo sapiens GN=VPS4A PE=1 SV=1;sp|O75351|VPS4B_HUMAN Vacuolar protein sorting-associated protein 4B	4	1	2.8	48.07	428	0.0015516	7.0507	81706	81706	0		-2.08854		66
O00148;Q13838	ATP-dependent RNA helicase DDX39A;Spliceosome RNA helicase DDX39B	DDX39A;DDX39B	sp|O00148|DX39A_HUMAN ATP-dependent RNA helicase DDX39A OS=Homo sapiens GN=DDX39A PE=1 SV=2;sp|Q13838|DX39B_HUMAN Spliceosome RNA helicase DDX39B OS=Homo sapiens GN=DDX39B PE=1 SV=1	2	8	19.7	49.129	427	0	91.945	3718000	3718000	0		3.4194		68
O00483	Cytochrome c oxidase subunit NDUFA4	NDUFA4	sp|O00483|NDUA4_HUMAN Cytochrome c oxidase subunit NDUFA4 OS=Homo sapiens GN=NDUFA4 PE=1 SV=1	1	1	12.3	9.3697	81	0.0015924	7.5494	550420	550420	0		0.663479		76
O00560	Syntenin-1	SDCBP	sp|O00560|SDCB1_HUMAN Syntenin-1 OS=Homo sapiens GN=SDCBP PE=1 SV=1	1	1	6	32.444	298	0.0009311	11.805	105350	105350	0		-1.72186		78
O00567	Nucleolar protein 56	NOP56	sp|O00567|NOP56_HUMAN Nucleolar protein 56 OS=Homo sapiens GN=NOP56 PE=1 SV=4	1	2	4.4	66.049	594	0.00097656	12.413	150700	150700	0		-1.20537		79
O00743	Serine/threonine-protein phosphatase 6 catalytic subunit;Serine/threonine-protein phosphatase 6 catalytic subunit, N-terminally processed	PPP6C	sp|O00743|PPP6_HUMAN Serine/threonine-protein phosphatase 6 catalytic subunit OS=Homo sapiens GN=PPP6C PE=1 SV=1	1	3	12.5	35.144	305	0	24.602	399250	399250	0		0.200239		81
O00767	Acyl-CoA desaturase	SCD	sp|O00767|ACOD_HUMAN Acyl-CoA desaturase OS=Homo sapiens GN=SCD PE=1 SV=2	1	1	3.6	41.522	359	0.0010373	14.513	261390	261390	0		-0.410851		82
O14727	Apoptotic protease-activating factor 1	APAF1	sp|O14727|APAF_HUMAN Apoptotic protease-activating factor 1 OS=Homo sapiens GN=APAF1 PE=1 SV=2	1	1	1.1	141.84	1248	0.00093545	11.824	27531	27531	0		-3.65792		87
O14732	Inositol monophosphatase 2	IMPA2	sp|O14732|IMPA2_HUMAN Inositol monophosphatase 2 OS=Homo sapiens GN=IMPA2 PE=1 SV=1	1	1	4.2	31.321	288	0.0077356	6.0393	97661	97661	0		-1.8312		88
O14757	Serine/threonine-protein kinase Chk1	CHEK1	sp|O14757|CHK1_HUMAN Serine/threonine-protein kinase Chk1 OS=Homo sapiens GN=CHEK1 PE=1 SV=2	1	5	14.9	54.433	476	0	31.624	310300	310300	0		-0.163391		91
O14776;Q5VWI1	Transcription elongation regulator 1	TCERG1	sp|O14776|TCRG1_HUMAN Transcription elongation regulator 1 OS=Homo sapiens GN=TCERG1 PE=1 SV=2	2	5	5.4	123.9	1098	0	35.584	173600	173600	0		-1.00129		92
O14908	PDZ domain-containing protein GIPC1	GIPC1	sp|O14908|GIPC1_HUMAN PDZ domain-containing protein GIPC1 OS=Homo sapiens GN=GIPC1 PE=1 SV=2	1	2	9	36.049	333	0.00086207	11.07	75831	75831	0		-2.19619		97
O14925;Q5SRD1	Mitochondrial import inner membrane translocase subunit Tim23;Putative mitochondrial import inner membrane translocase subunit Tim23B	TIMM23;TIMM23B	sp|O14925|TIM23_HUMAN Mitochondrial import inner membrane translocase subunit Tim23 OS=Homo sapiens GN=TIMM23 PE=1 SV=1;sp|Q5SRD1|TI23B_HUMAN Putative mitochondrial import inner membrane translocase subunit Tim23B OS=Homo sapiens GN=TIMM23B PE=5 SV=2	2	5	31.6	21.943	209	0	202.65	8716700	8716700	0		4.64866		98
O14929	Histone acetyltransferase type B catalytic subunit	HAT1	sp|O14929|HAT1_HUMAN Histone acetyltransferase type B catalytic subunit OS=Homo sapiens GN=HAT1 PE=1 SV=1	1	1	3.1	49.512	419	0.0036127	6.2442	107440	107440	0		-1.69352		99
O14981	TATA-binding protein-associated factor 172	BTAF1	sp|O14981|BTAF1_HUMAN TATA-binding protein-associated factor 172 OS=Homo sapiens GN=BTAF1 PE=1 SV=2	1	2	1.1	206.89	1849	0.0016653	10.709	5093	5093	0		-6.09239		102
O15013	Rho guanine nucleotide exchange factor 10	ARHGEF10	sp|O15013|ARHGA_HUMAN Rho guanine nucleotide exchange factor 10 OS=Homo sapiens GN=ARHGEF10 PE=1 SV=4	1	3	3.7	151.61	1369	0.0010593	16.515	53115	53115	0		-2.70986		103
O15260	Surfeit locus protein 4	SURF4	sp|O15260|SURF4_HUMAN Surfeit locus protein 4 OS=Homo sapiens GN=SURF4 PE=1 SV=3	1	1	6.7	30.394	269	0.00091912	11.664	214020	214020	0		-0.699308		109
O15269	Serine palmitoyltransferase 1	SPTLC1	sp|O15269|SPTC1_HUMAN Serine palmitoyltransferase 1 OS=Homo sapiens GN=SPTLC1 PE=1 SV=1	1	3	8.2	52.743	473	0	34.915	443350	443350	0		0.351393		110
O15270	Serine palmitoyltransferase 2	SPTLC2	sp|O15270|SPTC2_HUMAN Serine palmitoyltransferase 2 OS=Homo sapiens GN=SPTLC2 PE=1 SV=1	1	1	2.3	62.924	562	0.0015552	7.086	18768	18768	0		-4.21071		111
O15372	Eukaryotic translation initiation factor 3 subunit H	EIF3H	sp|O15372|EIF3H_HUMAN Eukaryotic translation initiation factor 3 subunit H OS=Homo sapiens GN=EIF3H PE=1 SV=1	1	3	11.1	39.93	352	0	17.385	230680	230680	0		-0.591162		114
O43156	TELO2-interacting protein 1 homolog	TTI1	sp|O43156|TTI1_HUMAN TELO2-interacting protein 1 homolog OS=Homo sapiens GN=TTI1 PE=1 SV=3	1	1	1.3	122.07	1089	0.00096339	12.161	48458	48458	0		-2.84225		119
O43164	E3 ubiquitin-protein ligase Praja-2	PJA2	sp|O43164|PJA2_HUMAN E3 ubiquitin-protein ligase Praja-2 OS=Homo sapiens GN=PJA2 PE=1 SV=4	1	4	8.1	78.213	708	0	28.615	289740	289740	0		-0.262295		120
O43237	Cytoplasmic dynein 1 light intermediate chain 2	DYNC1LI2	sp|O43237|DC1L2_HUMAN Cytoplasmic dynein 1 light intermediate chain 2 OS=Homo sapiens GN=DYNC1LI2 PE=1 SV=1	1	2	4.9	54.099	492	0.001001	12.954	96195	96195	0		-1.85302		122
O43293	Death-associated protein kinase 3	DAPK3	sp|O43293|DAPK3_HUMAN Death-associated protein kinase 3 OS=Homo sapiens GN=DAPK3 PE=1 SV=1	1	1	2.9	52.535	454	0.0016502	9.5832	64008	64008	0		-2.44073		124
O43432	Eukaryotic translation initiation factor 4 gamma 3	EIF4G3	sp|O43432|IF4G3_HUMAN Eukaryotic translation initiation factor 4 gamma 3 OS=Homo sapiens GN=EIF4G3 PE=1 SV=2	1	6	3.9	176.65	1585	0.00093721	11.83	15891	15891	0		-4.45077		127
O43617	Trafficking protein particle complex subunit 3	TRAPPC3	sp|O43617|TPPC3_HUMAN Trafficking protein particle complex subunit 3 OS=Homo sapiens GN=TRAPPC3 PE=1 SV=1	1	2	10.6	20.274	180	0.00090909	11.545	357900	357900	0		0.0425034		130
O43670	BUB3-interacting and GLEBS motif-containing protein ZNF207	ZNF207	sp|O43670|ZN207_HUMAN BUB3-interacting and GLEBS motif-containing protein ZNF207 OS=Homo sapiens GN=ZNF207 PE=1 SV=1	1	3	7.9	50.75	478	0	22.312	389760	389760	0		0.165531		131
O43776	Asparagine--tRNA ligase, cytoplasmic	NARS	sp|O43776|SYNC_HUMAN Asparagine--tRNA ligase, cytoplasmic OS=Homo sapiens GN=NARS PE=1 SV=1	1	5	10.4	62.942	548	0	27.83	344190	344190	0		-0.0138493		136
O43819	Protein SCO2 homolog, mitochondrial	SCO2	sp|O43819|SCO2_HUMAN Protein SCO2 homolog, mitochondrial OS=Homo sapiens GN=SCO2 PE=1 SV=3	1	2	10.5	29.81	266	0.0010101	13.202	632040	632040	0		0.862963		140
O43865;Q96HN2	Putative adenosylhomocysteinase 2;Putative adenosylhomocysteinase 3	AHCYL1;AHCYL2	sp|O43865|SAHH2_HUMAN Adenosylhomocysteinase 2 OS=Homo sapiens GN=AHCYL1 PE=1 SV=2;sp|Q96HN2|SAHH3_HUMAN Adenosylhomocysteinase 3 OS=Homo sapiens GN=AHCYL2 PE=1 SV=1	2	1	2.3	58.951	530	0.0022355	6.4638	35935	35935	0		-3.27359		143
O60231	Putative pre-mRNA-splicing factor ATP-dependent RNA helicase DHX16	DHX16	sp|O60231|DHX16_HUMAN Putative pre-mRNA-splicing factor ATP-dependent RNA helicase DHX16 OS=Homo sapiens GN=DHX16 PE=1 SV=2	1	3	3.8	119.26	1041	0	19.996	84693	84693	0		-2.03674		145
Q14558;O60256	Phosphoribosyl pyrophosphate synthase-associated protein 1;Phosphoribosyl pyrophosphate synthase-associated protein 2	PRPSAP1;PRPSAP2	sp|Q14558|KPRA_HUMAN Phosphoribosyl pyrophosphate synthase-associated protein 1 OS=Homo sapiens GN=PRPSAP1 PE=1 SV=2;sp|O60256|KPRB_HUMAN Phosphoribosyl pyrophosphate synthase-associated protein 2 OS=Homo sapiens GN=PRPSAP2 PE=1 SV=1	2	1	3.9	39.393	356	0.0077465	6.045	47547	47547	0		-2.86963		146
O60287	Nucleolar pre-ribosomal-associated protein 1	URB1	sp|O60287|NPA1P_HUMAN Nucleolar pre-ribosomal-associated protein 1 OS=Homo sapiens GN=URB1 PE=1 SV=4	1	4	2.1	254.39	2271	0	23.027	39438	39438	0		-3.1394		148
Q12756;O60333;O43896	Kinesin-like protein KIF1A;Kinesin-like protein KIF1B;Kinesin-like protein KIF1C	KIF1A;KIF1B;KIF1C	sp|Q12756|KIF1A_HUMAN Kinesin-like protein KIF1A OS=Homo sapiens GN=KIF1A PE=1 SV=2;sp|O60333|KIF1B_HUMAN Kinesin-like protein KIF1B OS=Homo sapiens GN=KIF1B PE=1 SV=5;sp|O43896|KIF1C_HUMAN Kinesin-like protein KIF1C OS=Homo sapiens GN=KIF1C PE=1 SV=3	3	2	1.5	191.06	1690	0.001005	13.039	20090	20090	0		-4.1125		151
O60684;O15131;P52294	Importin subunit alpha-7;Importin subunit alpha-6	KPNA6;KPNA5	sp|O60684|IMA7_HUMAN Importin subunit alpha-7 OS=Homo sapiens GN=KPNA6 PE=1 SV=1;sp|O15131|IMA6_HUMAN Importin subunit alpha-6 OS=Homo sapiens GN=KPNA5 PE=1 SV=2	3	3	9	60.029	536	0	16.733	128330	128330	0		-1.43719		156
O60830	Mitochondrial import inner membrane translocase subunit Tim17-B	TIMM17B	sp|O60830|TI17B_HUMAN Mitochondrial import inner membrane translocase subunit Tim17-B OS=Homo sapiens GN=TIMM17B PE=1 SV=1	1	1	4.1	18.273	172	0.0083507	5.9957	206880	206880	0		-0.74826		160
O60884	DnaJ homolog subfamily A member 2	DNAJA2	sp|O60884|DNJA2_HUMAN DnaJ homolog subfamily A member 2 OS=Homo sapiens GN=DNAJA2 PE=1 SV=1	1	8	18.9	45.745	412	0	58.73	2441100	2441100	0		2.8124		162
O75152	Zinc finger CCCH domain-containing protein 11A	ZC3H11A	sp|O75152|ZC11A_HUMAN Zinc finger CCCH domain-containing protein 11A OS=Homo sapiens GN=ZC3H11A PE=1 SV=3	1	1	1.6	89.13	810	0.0089409	5.9479	43637	43637	0		-2.99343		165
O75251	NADH dehydrogenase [ubiquinone] iron-sulfur protein 7, mitochondrial	NDUFS7	sp|O75251|NDUS7_HUMAN NADH dehydrogenase [ubiquinone] iron-sulfur protein 7, mitochondrial OS=Homo sapiens GN=NDUFS7 PE=1 SV=3	1	2	10.8	23.563	213	0.001692	10.91	248190	248190	0		-0.485609		170
O75352	Mannose-P-dolichol utilization defect 1 protein	MPDU1	sp|O75352|MPU1_HUMAN Mannose-P-dolichol utilization defect 1 protein OS=Homo sapiens GN=MPDU1 PE=1 SV=2	1	3	13.8	26.638	247	0	19.64	1967300	1967300	0		2.50109		174
O75390	Citrate synthase, mitochondrial	CS	sp|O75390|CISY_HUMAN Citrate synthase, mitochondrial OS=Homo sapiens GN=CS PE=1 SV=2	1	1	2.4	51.712	466	0.0070621	6.0526	128830	128830	0		-1.43159		176
O75417	DNA polymerase theta	POLQ	sp|O75417|DPOLQ_HUMAN DNA polymerase theta OS=Homo sapiens GN=POLQ PE=1 SV=2	1	2	0.9	289.62	2590	0.00092851	11.789	13356	13356	0		-4.70149		177
O75419	Cell division control protein 45 homolog	CDC45	sp|O75419|CDC45_HUMAN Cell division control protein 45 homolog OS=Homo sapiens GN=CDC45 PE=1 SV=1	1	5	10.6	65.568	566	0	50.838	925960	925960	0		1.4139		178
O75439	Mitochondrial-processing peptidase subunit beta	PMPCB	sp|O75439|MPPB_HUMAN Mitochondrial-processing peptidase subunit beta OS=Homo sapiens GN=PMPCB PE=1 SV=2	1	1	2.2	54.366	489	0.0043134	6.1978	40497	40497	0		-3.10117		180
O75449	Katanin p60 ATPase-containing subunit A1	KATNA1	sp|O75449|KTNA1_HUMAN Katanin p60 ATPase-containing subunit A1 OS=Homo sapiens GN=KATNA1 PE=1 SV=1	1	2	4.5	55.964	491	0.001675	10.788	69984	69984	0		-2.31196		181
O75477;O94905	Erlin-1;Erlin-2	ERLIN1;ERLIN2	sp|O75477|ERLN1_HUMAN Erlin-1 OS=Homo sapiens GN=ERLIN1 PE=1 SV=1;sp|O94905|ERLN2_HUMAN Erlin-2 OS=Homo sapiens GN=ERLIN2 PE=1 SV=1	2	3	11.3	38.925	346	0	22.253	330390	330390	0		-0.0728836		182
O75665	Oral-facial-digital syndrome 1 protein	OFD1	sp|O75665|OFD1_HUMAN Oral-facial-digital syndrome 1 protein OS=Homo sapiens GN=OFD1 PE=1 SV=1	1	3	4.5	116.67	1012	0	17.249	61458	61458	0		-2.49938		189
O75794	Cell division cycle protein 123 homolog	CDC123	sp|O75794|CD123_HUMAN Cell division cycle protein 123 homolog OS=Homo sapiens GN=CDC123 PE=1 SV=1	1	6	19.9	39.134	336	0	42.585	1068800	1068800	0		1.62087		193
O75807	Protein phosphatase 1 regulatory subunit 15A	PPP1R15A	sp|O75807|PR15A_HUMAN Protein phosphatase 1 regulatory subunit 15A OS=Homo sapiens GN=PPP1R15A PE=1 SV=1	1	4	8.3	73.477	674	0	23.544	168670	168670	0		-1.04285		194
O75832	26S proteasome non-ATPase regulatory subunit 10	PSMD10	sp|O75832|PSD10_HUMAN 26S proteasome non-ATPase regulatory subunit 10 OS=Homo sapiens GN=PSMD10 PE=1 SV=1	1	4	21.2	24.428	226	0	28.033	328550	328550	0		-0.0809402		196
O75880	Protein SCO1 homolog, mitochondrial	SCO1	sp|O75880|SCO1_HUMAN Protein SCO1 homolog, mitochondrial OS=Homo sapiens GN=SCO1 PE=1 SV=1	1	1	5.3	33.814	301	0.0015637	7.1981	396670	396670	0		0.190886		197
O94782	Ubiquitin carboxyl-terminal hydrolase 1	USP1	sp|O94782|UBP1_HUMAN Ubiquitin carboxyl-terminal hydrolase 1 OS=Homo sapiens GN=USP1 PE=1 SV=1	1	6	8.8	88.206	785	0	38.743	264230	264230	0		-0.39526		200
O94829	Importin-13	IPO13	sp|O94829|IPO13_HUMAN Importin-13 OS=Homo sapiens GN=IPO13 PE=1 SV=3	1	3	4	108.19	963	0	18.331	95456	95456	0		-1.86415		202
O95140	Mitofusin-2	MFN2	sp|O95140|MFN2_HUMAN Mitofusin-2 OS=Homo sapiens GN=MFN2 PE=1 SV=3	1	2	3.2	86.401	757	0.00092166	11.707	16667	16667	0		-4.38199		210
O95219	Sorting nexin-4	SNX4	sp|O95219|SNX4_HUMAN Sorting nexin-4 OS=Homo sapiens GN=SNX4 PE=1 SV=1	1	3	8.2	51.908	450	0	17.558	142140	142140	0		-1.28974		212
O95391	Pre-mRNA-splicing factor SLU7	SLU7	sp|O95391|SLU7_HUMAN Pre-mRNA-splicing factor SLU7 OS=Homo sapiens GN=SLU7 PE=1 SV=2	1	2	4.4	68.386	586	0.00099305	12.818	66114	66114	0		-2.39403		217
O95394	Phosphoacetylglucosamine mutase	PGM3	sp|O95394|AGM1_HUMAN Phosphoacetylglucosamine mutase OS=Homo sapiens GN=PGM3 PE=1 SV=1	1	4	9	59.851	542	0	29.341	625270	625270	0		0.847425		218
O95429	BAG family molecular chaperone regulator 4	BAG4	sp|O95429|BAG4_HUMAN BAG family molecular chaperone regulator 4 OS=Homo sapiens GN=BAG4 PE=1 SV=1	1	2	6.6	49.593	457	0	17.123	168060	168060	0		-1.04808		220
O95456	Proteasome assembly chaperone 1	PSMG1	sp|O95456|PSMG1_HUMAN Proteasome assembly chaperone 1 OS=Homo sapiens GN=PSMG1 PE=1 SV=1	1	2	10.4	32.854	288	0.0010142	13.304	251470	251470	0		-0.466667		222
O95573	Long-chain-fatty-acid--CoA ligase 3	ACSL3	sp|O95573|ACSL3_HUMAN Long-chain-fatty-acid--CoA ligase 3 OS=Homo sapiens GN=ACSL3 PE=1 SV=3	1	1	1.8	80.419	720	0.003655	6.3239	20568	20568	0		-4.07858		224
O95684	FGFR1 oncogene partner	FGFR1OP	sp|O95684|FR1OP_HUMAN FGFR1 oncogene partner OS=Homo sapiens GN=FGFR1OP PE=1 SV=1	1	4	16.5	43.064	399	0	23.579	662100	662100	0		0.929995		227
O95793	Double-stranded RNA-binding protein Staufen homolog 1	STAU1	sp|O95793|STAU1_HUMAN Double-stranded RNA-binding protein Staufen homolog 1 OS=Homo sapiens GN=STAU1 PE=1 SV=2	1	5	8.7	63.182	577	0	33.347	302230	302230	0		-0.201406		230
O96000	NADH dehydrogenase [ubiquinone] 1 beta subcomplex subunit 10	NDUFB10	sp|O96000|NDUBA_HUMAN NADH dehydrogenase [ubiquinone] 1 beta subcomplex subunit 10 OS=Homo sapiens GN=NDUFB10 PE=1 SV=3	1	3	20.3	20.776	172	0	19.371	692280	692280	0		0.994301		235
O96008	Mitochondrial import receptor subunit TOM40 homolog	TOMM40	sp|O96008|TOM40_HUMAN Mitochondrial import receptor subunit TOM40 homolog OS=Homo sapiens GN=TOMM40 PE=1 SV=1	1	2	8	37.893	361	0.0016779	10.798	287570	287570	0		-0.27314		236
O96019	Actin-like protein 6A	ACTL6A	sp|O96019|ACL6A_HUMAN Actin-like protein 6A OS=Homo sapiens GN=ACTL6A PE=1 SV=1	1	2	6.5	47.46	429	0.0010256	13.768	231430	231430	0		-0.586477		237
P00367;P49448	Glutamate dehydrogenase 1, mitochondrial;Glutamate dehydrogenase 2, mitochondrial	GLUD1;GLUD2	sp|P00367|DHE3_HUMAN Glutamate dehydrogenase 1, mitochondrial OS=Homo sapiens GN=GLUD1 PE=1 SV=2;sp|P49448|DHE4_HUMAN Glutamate dehydrogenase 2, mitochondrial OS=Homo sapiens GN=GLUD2 PE=1 SV=2	2	8	17.9	61.397	558	0	47.634	725980	725980	0		1.06288		239
P00403	Cytochrome c oxidase subunit 2	MT-CO2	sp|P00403|COX2_HUMAN Cytochrome c oxidase subunit 2 OS=Homo sapiens GN=MT-CO2 PE=1 SV=1	1	2	8.8	25.565	227	0.00093197	11.812	1103400	1103400	0		1.66683		242
P00505	Aspartate aminotransferase, mitochondrial	GOT2	sp|P00505|AATM_HUMAN Aspartate aminotransferase, mitochondrial OS=Homo sapiens GN=GOT2 PE=1 SV=3	1	1	2.8	47.517	430	0.0015987	7.6606	36634	36634	0		-3.2458		244
P00918	Carbonic anhydrase 2	CA2	sp|P00918|CAH2_HUMAN Carbonic anhydrase 2 OS=Homo sapiens GN=CA2 PE=1 SV=2	1	2	13.5	29.246	260	0.00097943	12.474	303030	303030	0		-0.197594		246
P04035	3-hydroxy-3-methylglutaryl-coenzyme A reductase	HMGCR	sp|P04035|HMDH_HUMAN 3-hydroxy-3-methylglutaryl-coenzyme A reductase OS=Homo sapiens GN=HMGCR PE=1 SV=1	1	3	4.2	97.475	888	0	17.076	288490	288490	0		-0.268532		252
P04040	Catalase	CAT	sp|P04040|CATA_HUMAN Catalase OS=Homo sapiens GN=CAT PE=1 SV=3	1	1	2.5	59.755	527	0.0016488	9.4684	92014	92014	0		-1.91713		253
P04350	Tubulin beta-4A chain	TUBB4A	sp|P04350|TBB4A_HUMAN Tubulin beta-4A chain OS=Homo sapiens GN=TUBB4A PE=1 SV=2	1	22	62.6	49.585	444	0	56.715	1630400	1630400	0		2.2301		260
P04632	Calpain small subunit 1	CAPNS1	sp|P04632|CPNS1_HUMAN Calpain small subunit 1 OS=Homo sapiens GN=CAPNS1 PE=1 SV=1	1	2	14.6	28.315	268	0.00092421	11.734	370360	370360	0		0.0918751		262
P04844	Dolichyl-diphosphooligosaccharide--protein glycosyltransferase subunit 2	RPN2	sp|P04844|RPN2_HUMAN Dolichyl-diphosphooligosaccharide--protein glycosyltransferase subunit 2 OS=Homo sapiens GN=RPN2 PE=1 SV=3	1	1	1.4	69.283	631	0.0036443	6.308	97861	97861	0		-1.82825		265
P05067	Amyloid beta A4 protein;N-APP;Soluble APP-alpha;Soluble APP-beta;C99;Beta-amyloid protein 42;Beta-amyloid protein 40;C83;P3(42);P3(40);C80;Gamma-secretase C-terminal fragment 59;Gamma-secretase C-terminal fragment 57;Gamma-secretase C-terminal fragment 50;C31	APP	sp|P05067|A4_HUMAN Amyloid beta A4 protein OS=Homo sapiens GN=APP PE=1 SV=3	1	1	1.6	86.942	770	0.001638	9.1055	65448	65448	0		-2.40863		267
P05090	Apolipoprotein D	APOD	sp|P05090|APOD_HUMAN Apolipoprotein D OS=Homo sapiens GN=APOD PE=1 SV=1	1	2	12.7	21.275	189	0.00099502	12.857	730060	730060	0		1.07096		269
P05386	60S acidic ribosomal protein P1	RPLP1	sp|P05386|RLA1_HUMAN 60S acidic ribosomal protein P1 OS=Homo sapiens GN=RPLP1 PE=1 SV=1	1	1	14	11.514	114	0	35.931	8362400	8362400	0		4.58879		273
P05423	DNA-directed RNA polymerase III subunit RPC4	POLR3D	sp|P05423|RPC4_HUMAN DNA-directed RNA polymerase III subunit RPC4 OS=Homo sapiens GN=POLR3D PE=1 SV=2	1	1	3.5	44.395	398	0.0016556	9.9808	96389	96389	0		-1.85011		276
P06748	Nucleophosmin	NPM1	sp|P06748|NPM_HUMAN Nucleophosmin OS=Homo sapiens GN=NPM1 PE=1 SV=2	1	1	3.1	32.575	294	0.0022848	6.7152	512790	512790	0		0.561314		284
P07741	Adenine phosphoribosyltransferase	APRT	sp|P07741|APT_HUMAN Adenine phosphoribosyltransferase OS=Homo sapiens GN=APRT PE=1 SV=2	1	1	7.2	19.608	180	0.0076816	6.0129	62994	62994	0		-2.46377		292
P08195	4F2 cell-surface antigen heavy chain	SLC3A2	sp|P08195|4F2_HUMAN 4F2 cell-surface antigen heavy chain OS=Homo sapiens GN=SLC3A2 PE=1 SV=3	1	8	18.1	67.993	630	0	74.975	1845000	1845000	0		2.40849		296
P08243	Asparagine synthetase [glutamine-hydrolyzing]	ASNS	sp|P08243|ASNS_HUMAN Asparagine synthetase [glutamine-hydrolyzing] OS=Homo sapiens GN=ASNS PE=1 SV=4	1	5	9.8	64.369	561	0	35.129	508240	508240	0		0.548456		298
P08559	Pyruvate dehydrogenase E1 component subunit alpha, somatic form, mitochondrial	PDHA1	sp|P08559|ODPA_HUMAN Pyruvate dehydrogenase E1 component subunit alpha, somatic form, mitochondrial OS=Homo sapiens GN=PDHA1 PE=1 SV=3	1	1	3.3	43.295	390	0.0016474	9.4684	59577	59577	0		-2.54423		299
P09936	Ubiquitin carboxyl-terminal hydrolase isozyme L1	UCHL1	sp|P09936|UCHL1_HUMAN Ubiquitin carboxyl-terminal hydrolase isozyme L1 OS=Homo sapiens GN=UCHL1 PE=1 SV=2	1	3	21.5	24.824	223	0.0010549	16.448	427370	427370	0		0.298431		310
P0DN79;P35520	Cystathionine beta-synthase	CBS	sp|P0DN79|CBSL_HUMAN Cystathionine beta-synthase-like protein OS=Homo sapiens GN=CBSL PE=3 SV=1;sp|P35520|CBS_HUMAN Cystathionine beta-synthase OS=Homo sapiens GN=CBS PE=1 SV=2	2	3	7.3	60.586	551	0	17.087	190590	190590	0		-0.866581		314
P10155	60 kDa SS-A/Ro ribonucleoprotein	TROVE2	sp|P10155|RO60_HUMAN 60 kDa SS-A/Ro ribonucleoprotein OS=Homo sapiens GN=TROVE2 PE=1 SV=2	1	3	8	60.67	538	0	19.318	268900	268900	0		-0.369984		315
P10644	cAMP-dependent protein kinase type I-alpha regulatory subunit;cAMP-dependent protein kinase type I-alpha regulatory subunit, N-terminally processed	PRKAR1A	sp|P10644|KAP0_HUMAN cAMP-dependent protein kinase type I-alpha regulatory subunit OS=Homo sapiens GN=PRKAR1A PE=1 SV=1	1	8	24.1	42.981	381	0	110.01	2042700	2042700	0		2.55535		318
P11177	Pyruvate dehydrogenase E1 component subunit beta, mitochondrial	PDHB	sp|P11177|ODPB_HUMAN Pyruvate dehydrogenase E1 component subunit beta, mitochondrial OS=Homo sapiens GN=PDHB PE=1 SV=3	1	1	3.1	39.233	359	0.0022642	6.587	57314	57314	0		-2.60009		324
P12081	Histidine--tRNA ligase, cytoplasmic	HARS	sp|P12081|SYHC_HUMAN Histidine--tRNA ligase, cytoplasmic OS=Homo sapiens GN=HARS PE=1 SV=2	1	1	2.6	57.41	509	0.001657	10.444	0	0	0				333
P12277	Creatine kinase B-type	CKB	sp|P12277|KCRB_HUMAN Creatine kinase B-type OS=Homo sapiens GN=CKB PE=1 SV=1	1	1	2.9	42.644	381	0.0016064	7.7602	141730	141730	0		-1.29391		338
P12956	X-ray repair cross-complementing protein 6	XRCC6	sp|P12956|XRCC6_HUMAN X-ray repair cross-complementing protein 6 OS=Homo sapiens GN=XRCC6 PE=1 SV=2	1	4	8	69.842	609	0	25.09	448650	448650	0		0.368536		339
P13010	X-ray repair cross-complementing protein 5	XRCC5	sp|P13010|XRCC5_HUMAN X-ray repair cross-complementing protein 5 OS=Homo sapiens GN=XRCC5 PE=1 SV=3	1	9	15.2	82.704	732	0	63.788	851340	851340	0		1.29268		340
P13674	Prolyl 4-hydroxylase subunit alpha-1	P4HA1	sp|P13674|P4HA1_HUMAN Prolyl 4-hydroxylase subunit alpha-1 OS=Homo sapiens GN=P4HA1 PE=1 SV=2	1	2	5.2	61.049	534	0.0016598	10.627	52962	52962	0		-2.71402		342
P13747	HLA class I histocompatibility antigen, alpha chain E	HLA-E	sp|P13747|HLAE_HUMAN HLA class I histocompatibility antigen, alpha chain E OS=Homo sapiens GN=HLA-E PE=1 SV=3	1	4	14.2	40.156	358	0	21.101	281150	281150	0		-0.305714		343
P13804	Electron transfer flavoprotein subunit alpha, mitochondrial	ETFA	sp|P13804|ETFA_HUMAN Electron transfer flavoprotein subunit alpha, mitochondrial OS=Homo sapiens GN=ETFA PE=1 SV=1	1	7	26.4	35.079	333	0	84.232	1697400	1697400	0		2.2882		345
P13861;P31323	cAMP-dependent protein kinase type II-alpha regulatory subunit	PRKAR2A	sp|P13861|KAP2_HUMAN cAMP-dependent protein kinase type II-alpha regulatory subunit OS=Homo sapiens GN=PRKAR2A PE=1 SV=2	2	5	17.1	45.518	404	0	30.207	553440	553440	0		0.671373		346
P14373	Zinc finger protein RFP	TRIM27	sp|P14373|TRI27_HUMAN Zinc finger protein RFP OS=Homo sapiens GN=TRIM27 PE=1 SV=1	1	2	4.7	58.489	513	0.0008881	11.348	91163	91163	0		-1.93053		349
P16989	Y-box-binding protein 3	YBX3	sp|P16989|YBOX3_HUMAN Y-box-binding protein 3 OS=Homo sapiens GN=YBX3 PE=1 SV=4	1	3	16.1	40.089	372	0.00096432	12.172	404770	404770	0		0.220049		365
P18085	ADP-ribosylation factor 4	ARF4	sp|P18085|ARF4_HUMAN ADP-ribosylation factor 4 OS=Homo sapiens GN=ARF4 PE=1 SV=3	1	6	33.9	20.511	180	0	42.83	3781300	3781300	0		3.44376		373
P18858	DNA ligase 1	LIG1	sp|P18858|DNLI1_HUMAN DNA ligase 1 OS=Homo sapiens GN=LIG1 PE=1 SV=1	1	1	1.3	101.73	919	0.0071023	6.0864	11091	11091	0		-4.96959		376
P19838	Nuclear factor NF-kappa-B p105 subunit;Nuclear factor NF-kappa-B p50 subunit	NFKB1	sp|P19838|NFKB1_HUMAN Nuclear factor NF-kappa-B p105 subunit OS=Homo sapiens GN=NFKB1 PE=1 SV=2	1	5	6.6	105.35	968	0	28.169	186910	186910	0		-0.894711		382
P20042	Eukaryotic translation initiation factor 2 subunit 2	EIF2S2	sp|P20042|IF2B_HUMAN Eukaryotic translation initiation factor 2 subunit 2 OS=Homo sapiens GN=EIF2S2 PE=1 SV=2	1	1	3	38.388	333	0.003647	6.3133	61064	61064	0		-2.50866		383
Q9NRW1;P20340;Q14964	Ras-related protein Rab-6B;Ras-related protein Rab-6A;Ras-related protein Rab-39A	RAB6B;RAB6A;RAB39A	sp|Q9NRW1|RAB6B_HUMAN Ras-related protein Rab-6B OS=Homo sapiens GN=RAB6B PE=1 SV=1;sp|P20340|RAB6A_HUMAN Ras-related protein Rab-6A OS=Homo sapiens GN=RAB6A PE=1 SV=3;sp|Q14964|RB39A_HUMAN Ras-related protein Rab-39A OS=Homo sapiens GN=RAB39A PE=1 SV=2	3	2	10.6	23.461	208	0.00092251	11.709	261500	261500	0		-0.410242		385
P20700	Lamin-B1	LMNB1	sp|P20700|LMNB1_HUMAN Lamin-B1 OS=Homo sapiens GN=LMNB1 PE=1 SV=2	1	2	3.9	66.408	586	0.00086881	11.117	3247400	3247400	0		3.22416		387
P21359	Neurofibromin;Neurofibromin truncated	NF1	sp|P21359|NF1_HUMAN Neurofibromin OS=Homo sapiens GN=NF1 PE=1 SV=2	1	2	0.9	319.37	2839	0.00094787	11.888	6105.7	6105.7	0		-5.83075		390
Q16473;P22105	Putative tenascin-XA;Tenascin-X	TNXA;TNXB	sp|Q16473|TENXA_HUMAN Putative tenascin-XA OS=Homo sapiens GN=TNXA PE=5 SV=2;sp|P22105|TENX_HUMAN Tenascin-X OS=Homo sapiens GN=TNXB PE=1 SV=4	2	2	12.2	33.739	311	0.00091743	11.606	150920	150920	0		-1.20327		397
P22695	Cytochrome b-c1 complex subunit 2, mitochondrial	UQCRC2	sp|P22695|QCR2_HUMAN Cytochrome b-c1 complex subunit 2, mitochondrial OS=Homo sapiens GN=UQCRC2 PE=1 SV=3	1	8	27.6	48.442	453	0	116	1056500	1056500	0		1.60417		402
Q9NRH3;P23258	Tubulin gamma-2 chain;Tubulin gamma-1 chain	TUBG2;TUBG1	sp|Q9NRH3|TBG2_HUMAN Tubulin gamma-2 chain OS=Homo sapiens GN=TUBG2 PE=2 SV=1;sp|P23258|TBG1_HUMAN Tubulin gamma-1 chain OS=Homo sapiens GN=TUBG1 PE=1 SV=2	2	3	9.3	51.091	451	0	18.357	400760	400760	0		0.205685		404
P23381	Tryptophan--tRNA ligase, cytoplasmic;T1-TrpRS;T2-TrpRS	WARS	sp|P23381|SYWC_HUMAN Tryptophan--tRNA ligase, cytoplasmic OS=Homo sapiens GN=WARS PE=1 SV=2	1	1	3.8	53.165	471	0.0015601	7.1597	235640	235640	0		-0.560469		406
P23526	Adenosylhomocysteinase	AHCY	sp|P23526|SAHH_HUMAN Adenosylhomocysteinase OS=Homo sapiens GN=AHCY PE=1 SV=4	1	1	2.8	47.716	432	0.0016181	8.0257	73396	73396	0		-2.24328		408
P24522	Growth arrest and DNA damage-inducible protein GADD45 alpha	GADD45A	sp|P24522|GA45A_HUMAN Growth arrest and DNA damage-inducible protein GADD45 alpha OS=Homo sapiens GN=GADD45A PE=1 SV=1	1	1	6.7	18.336	165	0.0070572	6.0526	126660	126660	0		-1.45609		411
P24539	ATP synthase F(0) complex subunit B1, mitochondrial	ATP5F1	sp|P24539|AT5F1_HUMAN ATP synthase F(0) complex subunit B1, mitochondrial OS=Homo sapiens GN=ATP5F1 PE=1 SV=2	1	3	19.1	28.908	256	0	24.021	167480	167480	0		-1.05306		413
P26196	Probable ATP-dependent RNA helicase DDX6	DDX6	sp|P26196|DDX6_HUMAN Probable ATP-dependent RNA helicase DDX6 OS=Homo sapiens GN=DDX6 PE=1 SV=2	1	4	10.1	54.416	483	0	23.81	189230	189230	0		-0.876913		425
P26640	Valine--tRNA ligase	VARS	sp|P26640|SYVC_HUMAN Valine--tRNA ligase OS=Homo sapiens GN=VARS PE=1 SV=4	1	12	13.3	140.47	1264	0	95.75	662550	662550	0		0.930975		429
P27797	Calreticulin	CALR	sp|P27797|CALR_HUMAN Calreticulin OS=Homo sapiens GN=CALR PE=1 SV=1	1	2	6.5	48.141	417	0.0010081	13.165	153110	153110	0		-1.18249		434
P28562	Dual specificity protein phosphatase 1	DUSP1	sp|P28562|DUS1_HUMAN Dual specificity protein phosphatase 1 OS=Homo sapiens GN=DUSP1 PE=1 SV=3	1	2	5.7	39.297	367	0.00086655	11.109	188910	188910	0		-0.879354		441
P30048	Thioredoxin-dependent peroxide reductase, mitochondrial	PRDX3	sp|P30048|PRDX3_HUMAN Thioredoxin-dependent peroxide reductase, mitochondrial OS=Homo sapiens GN=PRDX3 PE=1 SV=3	1	1	4.7	27.692	256	0.0036258	6.2541	90753	90753	0		-1.93704		446
P31942	Heterogeneous nuclear ribonucleoprotein H3	HNRNPH3	sp|P31942|HNRH3_HUMAN Heterogeneous nuclear ribonucleoprotein H3 OS=Homo sapiens GN=HNRNPH3 PE=1 SV=2	1	1	3.5	36.926	346	0.0022814	6.7023	39938	39938	0		-3.12122		457
P35637;Q92804	RNA-binding protein FUS;TATA-binding protein-associated factor 2N	FUS;TAF15	sp|P35637|FUS_HUMAN RNA-binding protein FUS OS=Homo sapiens GN=FUS PE=1 SV=1;sp|Q92804|RBP56_HUMAN TATA-binding protein-associated factor 2N OS=Homo sapiens GN=TAF15 PE=1 SV=1	2	1	2.7	53.425	526	0.0022523	6.5539	0	0	0				484
P37108	Signal recognition particle 14 kDa protein	SRP14	sp|P37108|SRP14_HUMAN Signal recognition particle 14 kDa protein OS=Homo sapiens GN=SRP14 PE=1 SV=2	1	1	10.3	14.57	136	0	19.635	419520	419520	0		0.271687		491
P37198	Nuclear pore glycoprotein p62	NUP62	sp|P37198|NUP62_HUMAN Nuclear pore glycoprotein p62 OS=Homo sapiens GN=NUP62 PE=1 SV=3	1	2	4	53.254	522	0.0010111	13.21	271520	271520	0		-0.355995		492
P41229;Q9BY66;Q9UGL1;P29375	Lysine-specific demethylase 5C	KDM5C	sp|P41229|KDM5C_HUMAN Lysine-specific demethylase 5C OS=Homo sapiens GN=KDM5C PE=1 SV=2	4	14	11.8	175.72	1560	0	88.476	338020	338020	0		-0.0399456		508
P42166	Lamina-associated polypeptide 2, isoform alpha;Thymopoietin;Thymopentin	TMPO	sp|P42166|LAP2A_HUMAN Lamina-associated polypeptide 2, isoform alpha OS=Homo sapiens GN=TMPO PE=1 SV=2	1	2	3.3	75.491	694	0.0010235	13.698	72324	72324	0		-2.26451		510
P42224	Signal transducer and activator of transcription 1-alpha/beta	STAT1	sp|P42224|STAT1_HUMAN Signal transducer and activator of transcription 1-alpha/beta OS=Homo sapiens GN=STAT1 PE=1 SV=2	1	2	3.3	87.334	750	0.00096618	12.189	113780	113780	0		-1.61081		511
P42345	Serine/threonine-protein kinase mTOR	MTOR	sp|P42345|MTOR_HUMAN Serine/threonine-protein kinase mTOR OS=Homo sapiens GN=MTOR PE=1 SV=1	1	2	0.9	288.89	2549	0.00091996	11.679	12070	12070	0		-4.84756		513
P42704;Q9NP80	Leucine-rich PPR motif-containing protein, mitochondrial	LRPPRC	sp|P42704|LPPRC_HUMAN Leucine-rich PPR motif-containing protein, mitochondrial OS=Homo sapiens GN=LRPPRC PE=1 SV=3	2	10	7.5	157.9	1394	0	64.867	225520	225520	0		-0.623798		518
P43003	Excitatory amino acid transporter 1	SLC1A3	sp|P43003|EAA1_HUMAN Excitatory amino acid transporter 1 OS=Homo sapiens GN=SLC1A3 PE=1 SV=1	1	2	5.9	59.572	542	0	70.72	531530	531530	0		0.613096		521
P43686	26S protease regulatory subunit 6B	PSMC4	sp|P43686|PRS6B_HUMAN 26S protease regulatory subunit 6B OS=Homo sapiens GN=PSMC4 PE=1 SV=2	1	8	24.2	47.366	418	0	78.292	2281500	2281500	0		2.71486		526
P46459	Vesicle-fusing ATPase	NSF	sp|P46459|NSF_HUMAN Vesicle-fusing ATPase OS=Homo sapiens GN=NSF PE=1 SV=3	1	1	1.7	82.593	744	0.0015974	7.6511	17439	17439	0		-4.31666		531
P46734	Dual specificity mitogen-activated protein kinase kinase 3	MAP2K3	sp|P46734|MP2K3_HUMAN Dual specificity mitogen-activated protein kinase kinase 3 OS=Homo sapiens GN=MAP2K3 PE=1 SV=2	1	2	7.2	39.318	347	0.00089206	11.378	46469	46469	0		-2.90271		532
P46778	60S ribosomal protein L21	RPL21	sp|P46778|RL21_HUMAN 60S ribosomal protein L21 OS=Homo sapiens GN=RPL21 PE=1 SV=2	1	2	16.2	18.565	160	0.00087489	11.168	563690	563690	0		0.697847		535
P46779	60S ribosomal protein L28	RPL28	sp|P46779|RL28_HUMAN 60S ribosomal protein L28 OS=Homo sapiens GN=RPL28 PE=1 SV=3	1	2	15.3	15.747	137	0.00085324	10.994	116520	116520	0		-1.57648		536
P47756	F-actin-capping protein subunit beta	CAPZB	sp|P47756|CAPZB_HUMAN F-actin-capping protein subunit beta OS=Homo sapiens GN=CAPZB PE=1 SV=4	1	7	28.9	31.35	277	0	42.69	787470	787470	0		1.18017		543
P47985	Cytochrome b-c1 complex subunit Rieske, mitochondrial;Cytochrome b-c1 complex subunit 11	UQCRFS1	sp|P47985|UCRI_HUMAN Cytochrome b-c1 complex subunit Rieske, mitochondrial OS=Homo sapiens GN=UQCRFS1 PE=1 SV=2	1	1	8	29.668	274	0.0035997	6.2032	106300	106300	0		-1.70891		546
P48507	Glutamate--cysteine ligase regulatory subunit	GCLM	sp|P48507|GSH0_HUMAN Glutamate--cysteine ligase regulatory subunit OS=Homo sapiens GN=GCLM PE=1 SV=1	1	2	10.2	30.727	274	0.00097087	12.339	218160	218160	0		-0.671667		549
P48651	Phosphatidylserine synthase 1	PTDSS1	sp|P48651|PTSS1_HUMAN Phosphatidylserine synthase 1 OS=Homo sapiens GN=PTDSS1 PE=1 SV=1	1	1	2.7	55.527	473	0.0016543	9.7453	118290	118290	0		-1.55473		552
Q8N752;P48729	Casein kinase I isoform alpha-like;Casein kinase I isoform alpha	CSNK1A1L;CSNK1A1	sp|Q8N752|KC1AL_HUMAN Casein kinase I isoform alpha-like OS=Homo sapiens GN=CSNK1A1L PE=2 SV=2;sp|P48729|KC1A_HUMAN Casein kinase I isoform alpha OS=Homo sapiens GN=CSNK1A1 PE=1 SV=2	2	1	3.6	39.085	337	0.0077139	6.0272	61424	61424	0		-2.50018		553
P48739	Phosphatidylinositol transfer protein beta isoform	PITPNB	sp|P48739|PIPNB_HUMAN Phosphatidylinositol transfer protein beta isoform OS=Homo sapiens GN=PITPNB PE=1 SV=2	1	2	9.6	31.54	271	0.00091575	11.598	102500	102500	0		-1.76143		554
P49591	Serine--tRNA ligase, cytoplasmic	SARS	sp|P49591|SYSC_HUMAN Serine--tRNA ligase, cytoplasmic OS=Homo sapiens GN=SARS PE=1 SV=3	1	5	14.2	58.777	514	0	32.297	689540	689540	0		0.988581		559
P49662	Caspase-4;Caspase-4 subunit 1;Caspase-4 subunit 2	CASP4	sp|P49662|CASP4_HUMAN Caspase-4 OS=Homo sapiens GN=CASP4 PE=1 SV=1	1	1	2.9	43.262	377	0.0089779	5.9778	8456.2	8456.2	0		-5.3609		560
P50750	Cyclin-dependent kinase 9	CDK9	sp|P50750|CDK9_HUMAN Cyclin-dependent kinase 9 OS=Homo sapiens GN=CDK9 PE=1 SV=3	1	2	5.4	42.777	372	0.0015711	7.2867	64832	64832	0		-2.42228		572
P50851	Lipopolysaccharide-responsive and beige-like anchor protein	LRBA	sp|P50851|LRBA_HUMAN Lipopolysaccharide-responsive and beige-like anchor protein OS=Homo sapiens GN=LRBA PE=1 SV=4	1	3	1.4	319.1	2863	0.0010604	16.543	15440	15440	0		-4.49231		573
P51530	DNA replication ATP-dependent helicase/nuclease DNA2;DNA replication nuclease DNA2;DNA replication ATP-dependent helicase DNA2	DNA2	sp|P51530|DNA2_HUMAN DNA replication ATP-dependent helicase/nuclease DNA2 OS=Homo sapiens GN=DNA2 PE=1 SV=3	1	4	4.6	120.41	1060	0	22.675	45971	45971	0		-2.91826		578
P51570	Galactokinase	GALK1	sp|P51570|GALK1_HUMAN Galactokinase OS=Homo sapiens GN=GALK1 PE=1 SV=1	1	2	5.6	42.272	392	0.001032	14.201	111150	111150	0		-1.64455		581
P51571	Translocon-associated protein subunit delta	SSR4	sp|P51571|SSRD_HUMAN Translocon-associated protein subunit delta OS=Homo sapiens GN=SSR4 PE=1 SV=1	1	3	19.7	18.998	173	0	27.672	2738200	2738200	0		2.9781		582
P51665	26S proteasome non-ATPase regulatory subunit 7	PSMD7	sp|P51665|PSMD7_HUMAN 26S proteasome non-ATPase regulatory subunit 7 OS=Homo sapiens GN=PSMD7 PE=1 SV=2	1	2	9	37.025	324	0.00085911	11.055	149750	149750	0		-1.2145		585
P51784	Ubiquitin carboxyl-terminal hydrolase 11	USP11	sp|P51784|UBP11_HUMAN Ubiquitin carboxyl-terminal hydrolase 11 OS=Homo sapiens GN=USP11 PE=1 SV=3	1	4	4.5	109.82	963	0	18.74	123670	123670	0		-1.49056		586
P51812;Q15349;Q15418	Ribosomal protein S6 kinase alpha-3;Ribosomal protein S6 kinase alpha-2;Ribosomal protein S6 kinase alpha-1	RPS6KA3;RPS6KA2;RPS6KA1	sp|P51812|KS6A3_HUMAN Ribosomal protein S6 kinase alpha-3 OS=Homo sapiens GN=RPS6KA3 PE=1 SV=1;sp|Q15349|KS6A2_HUMAN Ribosomal protein S6 kinase alpha-2 OS=Homo sapiens GN=RPS6KA2 PE=1 SV=2;sp|Q15418|KS6A1_HUMAN Ribosomal protein S6 kinase alpha-1 OS=Homo	3	2	3.6	83.735	740	0.00097276	12.37	47227	47227	0		-2.87937		587
P52306	Rap1 GTPase-GDP dissociation stimulator 1	RAP1GDS1	sp|P52306|GDS1_HUMAN Rap1 GTPase-GDP dissociation stimulator 1 OS=Homo sapiens GN=RAP1GDS1 PE=1 SV=3	1	2	5.4	66.316	607	0	19.139	108320	108320	0		-1.68176		591
P53041	Serine/threonine-protein phosphatase 5	PPP5C	sp|P53041|PPP5_HUMAN Serine/threonine-protein phosphatase 5 OS=Homo sapiens GN=PPP5C PE=1 SV=1	1	3	6.4	56.878	499	0	16.678	126200	126200	0		-1.46134		600
P54577	Tyrosine--tRNA ligase, cytoplasmic;Tyrosine--tRNA ligase, cytoplasmic, N-terminally processed	YARS	sp|P54577|SYYC_HUMAN Tyrosine--tRNA ligase, cytoplasmic OS=Homo sapiens GN=YARS PE=1 SV=4	1	3	7.2	59.143	528	0	17.04	89680	89680	0		-1.9542		609
P54578	Ubiquitin carboxyl-terminal hydrolase 14	USP14	sp|P54578|UBP14_HUMAN Ubiquitin carboxyl-terminal hydrolase 14 OS=Homo sapiens GN=USP14 PE=1 SV=3	1	2	4.9	56.068	494	0.00091075	11.558	92755	92755	0		-1.90556		610
P55209	Nucleosome assembly protein 1-like 1	NAP1L1	sp|P55209|NP1L1_HUMAN Nucleosome assembly protein 1-like 1 OS=Homo sapiens GN=NAP1L1 PE=1 SV=1	1	8	17.6	45.374	391	0	170.81	11149000	11149000	0		5.00372		619
Q6EEV6;P61956;P55854	Small ubiquitin-related modifier 4;Small ubiquitin-related modifier 2;Small ubiquitin-related modifier 3	SUMO4;SUMO2;SUMO3	sp|Q6EEV6|SUMO4_HUMAN Small ubiquitin-related modifier 4 OS=Homo sapiens GN=SUMO4 PE=1 SV=2;sp|P61956|SUMO2_HUMAN Small ubiquitin-related modifier 2 OS=Homo sapiens GN=SUMO2 PE=1 SV=3;sp|P55854|SUMO3_HUMAN Small ubiquitin-related modifier 3 OS=Homo sapiens	3	1	12.6	10.685	95	0.0015625	7.1627	0	0	0				623
P60228	Eukaryotic translation initiation factor 3 subunit E	EIF3E	sp|P60228|EIF3E_HUMAN Eukaryotic translation initiation factor 3 subunit E OS=Homo sapiens GN=EIF3E PE=1 SV=1	1	4	9.7	52.22	445	0	24.551	313420	313420	0		-0.148956		633
P60510	Serine/threonine-protein phosphatase 4 catalytic subunit	PPP4C	sp|P60510|PP4C_HUMAN Serine/threonine-protein phosphatase 4 catalytic subunit OS=Homo sapiens GN=PPP4C PE=1 SV=1	1	1	3.6	35.08	307	0.0036206	6.253	0	0	0				634
P60604	Ubiquitin-conjugating enzyme E2 G2	UBE2G2	sp|P60604|UB2G2_HUMAN Ubiquitin-conjugating enzyme E2 G2 OS=Homo sapiens GN=UBE2G2 PE=1 SV=1	1	3	29.1	18.566	165	0	17.945	2031100	2031100	0		2.54714		635
P60900	Proteasome subunit alpha type-6	PSMA6	sp|P60900|PSA6_HUMAN Proteasome subunit alpha type-6 OS=Homo sapiens GN=PSMA6 PE=1 SV=1	1	4	17.9	27.399	246	0	29.036	784110	784110	0		1.174		641
Q9C0K3;Q9P1U1;P61158	Actin-related protein 3C;Actin-related protein 3B;Actin-related protein 3	ACTR3C;ACTR3B;ACTR3	sp|Q9C0K3|ARP3C_HUMAN Actin-related protein 3C OS=Homo sapiens GN=ACTR3C PE=2 SV=1;sp|Q9P1U1|ARP3B_HUMAN Actin-related protein 3B OS=Homo sapiens GN=ACTR3B PE=2 SV=1;sp|P61158|ARP3_HUMAN Actin-related protein 3 OS=Homo sapiens GN=ACTR3 PE=1 SV=3	3	1	5.2	23.712	210	0.0009542	12.019	314170	314170	0		-0.145508		644
P61803	Dolichyl-diphosphooligosaccharide--protein glycosyltransferase subunit DAD1	DAD1	sp|P61803|DAD1_HUMAN Dolichyl-diphosphooligosaccharide--protein glycosyltransferase subunit DAD1 OS=Homo sapiens GN=DAD1 PE=1 SV=3	1	1	10.6	12.497	113	0.0089532	5.963	0	0	0				654
P62191	26S protease regulatory subunit 4	PSMC1	sp|P62191|PRS4_HUMAN 26S protease regulatory subunit 4 OS=Homo sapiens GN=PSMC1 PE=1 SV=1	1	9	24.3	49.184	440	0	82.806	2320100	2320100	0		2.73906		661
P62306	Small nuclear ribonucleoprotein F	SNRPF	sp|P62306|RUXF_HUMAN Small nuclear ribonucleoprotein F OS=Homo sapiens GN=SNRPF PE=1 SV=1	1	1	15.1	9.7251	86	0.0016168	7.9847	531730	531730	0		0.61364		674
P62487	DNA-directed RNA polymerase II subunit RPB7	POLR2G	sp|P62487|RPB7_HUMAN DNA-directed RNA polymerase II subunit RPB7 OS=Homo sapiens GN=POLR2G PE=1 SV=1	1	3	20.9	19.294	172	0	30.525	563700	563700	0		0.697874		677
P67775;P62714	Serine/threonine-protein phosphatase 2A catalytic subunit alpha isoform;Serine/threonine-protein phosphatase 2A catalytic subunit beta isoform	PPP2CA;PPP2CB	sp|P67775|PP2AA_HUMAN Serine/threonine-protein phosphatase 2A catalytic subunit alpha isoform OS=Homo sapiens GN=PPP2CA PE=1 SV=1;sp|P62714|PP2AB_HUMAN Serine/threonine-protein phosphatase 2A catalytic subunit beta isoform OS=Homo sapiens GN=PPP2CB PE=1 SV	2	2	8.4	35.594	309	0	62.215	512140	512140	0		0.559484		679
P62847	40S ribosomal protein S24	RPS24	sp|P62847|RS24_HUMAN 40S ribosomal protein S24 OS=Homo sapiens GN=RPS24 PE=1 SV=1	1	2	20.3	15.423	133	0	32.131	1770700	1770700	0		2.34919		685
P62877	E3 ubiquitin-protein ligase RBX1;E3 ubiquitin-protein ligase RBX1, N-terminally processed	RBX1	sp|P62877|RBX1_HUMAN E3 ubiquitin-protein ligase RBX1 OS=Homo sapiens GN=RBX1 PE=1 SV=1	1	1	16.7	12.274	108	0.0015662	7.222	263550	263550	0		-0.398977		689
P63151;Q00005;Q66LE6	Serine/threonine-protein phosphatase 2A 55 kDa regulatory subunit B alpha isoform	PPP2R2A	sp|P63151|2ABA_HUMAN Serine/threonine-protein phosphatase 2A 55 kDa regulatory subunit B alpha isoform OS=Homo sapiens GN=PPP2R2A PE=1 SV=1	3	3	9.2	51.691	447	0	24.005	328630	328630	0		-0.0805893		699
Q15155;P69849;Q5JPE7	Nodal modulator 1;Nodal modulator 3;Nodal modulator 2	NOMO1;NOMO3;NOMO2	sp|Q15155|NOMO1_HUMAN Nodal modulator 1 OS=Homo sapiens GN=NOMO1 PE=1 SV=5;sp|P69849|NOMO3_HUMAN Nodal modulator 3 OS=Homo sapiens GN=NOMO3 PE=3 SV=2;sp|Q5JPE7|NOMO2_HUMAN Nodal modulator 2 OS=Homo sapiens GN=NOMO2 PE=1 SV=1	3	4	3.4	134.32	1222	0	22.056	85356	85356	0		-2.02549		713
P78318	Immunoglobulin-binding protein 1	IGBP1	sp|P78318|IGBP1_HUMAN Immunoglobulin-binding protein 1 OS=Homo sapiens GN=IGBP1 PE=1 SV=1	1	1	3.8	39.221	339	0.0022918	6.7695	70210	70210	0		-2.30731		714
Q00537	Cyclin-dependent kinase 17	CDK17	sp|Q00537|CDK17_HUMAN Cyclin-dependent kinase 17 OS=Homo sapiens GN=CDK17 PE=1 SV=2	1	3	6.1	59.582	523	0.0076709	6.0104	33660	33660	0		-3.36795		727
Q00587	Cdc42 effector protein 1	CDC42EP1	sp|Q00587|BORG5_HUMAN Cdc42 effector protein 1 OS=Homo sapiens GN=CDC42EP1 PE=1 SV=1	1	5	16.1	40.294	391	0	30.891	464400	464400	0		0.418314		728
Q01968	Inositol polyphosphate 5-phosphatase OCRL-1	OCRL	sp|Q01968|OCRL_HUMAN Inositol polyphosphate 5-phosphatase OCRL-1 OS=Homo sapiens GN=OCRL PE=1 SV=3	1	2	3.2	104.2	901	0.00085179	10.974	39067	39067	0		-3.15303		739
Q02790	Peptidyl-prolyl cis-trans isomerase FKBP4;Peptidyl-prolyl cis-trans isomerase FKBP4, N-terminally processed	FKBP4	sp|Q02790|FKBP4_HUMAN Peptidyl-prolyl cis-trans isomerase FKBP4 OS=Homo sapiens GN=FKBP4 PE=1 SV=3	1	2	5.4	51.804	459	0.001	12.931	177750	177750	0		-0.967205		741
Q02809	Procollagen-lysine,2-oxoglutarate 5-dioxygenase 1	PLOD1	sp|Q02809|PLOD1_HUMAN Procollagen-lysine,2-oxoglutarate 5-dioxygenase 1 OS=Homo sapiens GN=PLOD1 PE=1 SV=2	1	1	1.5	83.549	727	0.0015736	7.3141	0	0	0				742
Q04837	Single-stranded DNA-binding protein, mitochondrial	SSBP1	sp|Q04837|SSBP_HUMAN Single-stranded DNA-binding protein, mitochondrial OS=Homo sapiens GN=SSBP1 PE=1 SV=1	1	2	20.3	17.259	148	0.0016892	10.871	288570	288570	0		-0.268133		749
Q04917	14-3-3 protein eta	YWHAH	sp|Q04917|1433F_HUMAN 14-3-3 protein eta OS=Homo sapiens GN=YWHAH PE=1 SV=4	1	3	11	28.218	246	0.008947	5.9522	171230	171230	0		-1.02112		750
Q06203	Amidophosphoribosyltransferase	PPAT	sp|Q06203|PUR1_HUMAN Amidophosphoribosyltransferase OS=Homo sapiens GN=PPAT PE=1 SV=1	1	4	9.7	57.398	517	0	28.798	250000	250000	0		-0.475126		751
Q06265	Exosome complex component RRP45	EXOSC9	sp|Q06265|EXOS9_HUMAN Exosome complex component RRP45 OS=Homo sapiens GN=EXOSC9 PE=1 SV=3	1	2	5.5	48.948	439	0.00097182	12.339	105000	105000	0		-1.72667		753
Q06546	GA-binding protein alpha chain	GABPA	sp|Q06546|GABPA_HUMAN GA-binding protein alpha chain OS=Homo sapiens GN=GABPA PE=1 SV=1	1	1	2.6	51.295	454	0.0022936	6.8012	0	0	0				755
Q07020	60S ribosomal protein L18	RPL18	sp|Q07020|RL18_HUMAN 60S ribosomal protein L18 OS=Homo sapiens GN=RPL18 PE=1 SV=2	1	3	19.7	21.634	188	0	22.015	1157200	1157200	0		1.73551		757
Q07666	KH domain-containing, RNA-binding, signal transduction-associated protein 1	KHDRBS1	sp|Q07666|KHDR1_HUMAN KH domain-containing, RNA-binding, signal transduction-associated protein 1 OS=Homo sapiens GN=KHDRBS1 PE=1 SV=1	1	3	8.6	48.227	443	0	18.219	497870	497870	0		0.518715		759
Q09028	Histone-binding protein RBBP4	RBBP4	sp|Q09028|RBBP4_HUMAN Histone-binding protein RBBP4 OS=Homo sapiens GN=RBBP4 PE=1 SV=3	1	7	16.5	47.655	425	0	54.248	880130	880130	0		1.34066		769
Q10570	Cleavage and polyadenylation specificity factor subunit 1	CPSF1	sp|Q10570|CPSF1_HUMAN Cleavage and polyadenylation specificity factor subunit 1 OS=Homo sapiens GN=CPSF1 PE=1 SV=2	1	2	1.5	160.88	1443	0.00092081	11.702	14455	14455	0		-4.58741		773
Q10713	Mitochondrial-processing peptidase subunit alpha	PMPCA	sp|Q10713|MPPA_HUMAN Mitochondrial-processing peptidase subunit alpha OS=Homo sapiens GN=PMPCA PE=1 SV=2	1	4	9	58.252	525	0	34.212	311000	311000	0		-0.160139		774
Q12874	Splicing factor 3A subunit 3	SF3A3	sp|Q12874|SF3A3_HUMAN Splicing factor 3A subunit 3 OS=Homo sapiens GN=SF3A3 PE=1 SV=1	1	1	1.8	58.848	501	0.0022489	6.5391	32238	32238	0		-3.43022		778
Q12996	Cleavage stimulation factor subunit 3	CSTF3	sp|Q12996|CSTF3_HUMAN Cleavage stimulation factor subunit 3 OS=Homo sapiens GN=CSTF3 PE=1 SV=1	1	1	1.7	82.921	717	0.0022796	6.7023	28167	28167	0		-3.62498		782
Q13015	Protein AF1q	MLLT11	sp|Q13015|AF1Q_HUMAN Protein AF1q OS=Homo sapiens GN=MLLT11 PE=1 SV=1	1	1	15.6	10.061	90	0	28.42	1137600	1137600	0		1.71087		783
Q13049	E3 ubiquitin-protein ligase TRIM32	TRIM32	sp|Q13049|TRI32_HUMAN E3 ubiquitin-protein ligase TRIM32 OS=Homo sapiens GN=TRIM32 PE=1 SV=2	1	2	5.7	71.988	653	0	34.644	209120	209120	0		-0.732723		786
Q13123	Protein Red	IK	sp|Q13123|RED_HUMAN Protein Red OS=Homo sapiens GN=IK PE=1 SV=3	1	2	3.4	65.601	557	0.0016807	10.814	75105	75105	0		-2.21007		788
Q13131	5-AMP-activated protein kinase catalytic subunit alpha-1	PRKAA1	sp|Q13131|AAPK1_HUMAN 5-AMP-activated protein kinase catalytic subunit alpha-1 OS=Homo sapiens GN=PRKAA1 PE=1 SV=4	1	2	4.7	64.009	559	0.00094162	11.845	86762	86762	0		-2.00192		789
Q13232	Nucleoside diphosphate kinase 3	NME3	sp|Q13232|NDK3_HUMAN Nucleoside diphosphate kinase 3 OS=Homo sapiens GN=NME3 PE=1 SV=2	1	3	20.7	19.015	169	0	17.89	107050	107050	0		-1.69877		795
Q13438	Protein OS-9	OS9	sp|Q13438|OS9_HUMAN Protein OS-9 OS=Homo sapiens GN=OS9 PE=1 SV=1	1	3	4.2	75.561	667	0	16.71	194970	194970	0		-0.833801		803
Q13547;O15379	Histone deacetylase 1	HDAC1	sp|Q13547|HDAC1_HUMAN Histone deacetylase 1 OS=Homo sapiens GN=HDAC1 PE=1 SV=1	2	7	16.8	55.102	482	0	17.912	348900	348900	0		0.00576019		807
Q13564	NEDD8-activating enzyme E1 regulatory subunit	NAE1	sp|Q13564|ULA1_HUMAN NEDD8-activating enzyme E1 regulatory subunit OS=Homo sapiens GN=NAE1 PE=1 SV=1	1	1	2.8	60.246	534	0.0023077	6.9329	93593	93593	0		-1.89258		808
Q13617	Cullin-2	CUL2	sp|Q13617|CUL2_HUMAN Cullin-2 OS=Homo sapiens GN=CUL2 PE=1 SV=2	1	2	3	86.982	745	0.001002	12.967	132920	132920	0		-1.3865		810
Q13637	Ras-related protein Rab-32	RAB32	sp|Q13637|RAB32_HUMAN Ras-related protein Rab-32 OS=Homo sapiens GN=RAB32 PE=1 SV=3	1	3	19.1	24.997	225	0	16.969	281470	281470	0		-0.304073		812
Q13685	Angio-associated migratory cell protein	AAMP	sp|Q13685|AAMP_HUMAN Angio-associated migratory cell protein OS=Homo sapiens GN=AAMP PE=1 SV=2	1	3	8.5	46.75	434	0	26.669	715100	715100	0		1.04109		813
Q13772	Nuclear receptor coactivator 4	NCOA4	sp|Q13772|NCOA4_HUMAN Nuclear receptor coactivator 4 OS=Homo sapiens GN=NCOA4 PE=1 SV=1	1	4	6.7	69.725	614	0	35.908	333410	333410	0		-0.0597572		814
Q13867	Bleomycin hydrolase	BLMH	sp|Q13867|BLMH_HUMAN Bleomycin hydrolase OS=Homo sapiens GN=BLMH PE=1 SV=1	1	1	2.4	52.562	455	0.0016038	7.7255	292230	292230	0		-0.24995		817
Q13868	Exosome complex component RRP4	EXOSC2	sp|Q13868|EXOS2_HUMAN Exosome complex component RRP4 OS=Homo sapiens GN=EXOSC2 PE=1 SV=2	1	2	7.8	32.789	293	0.0010121	13.223	247770	247770	0		-0.488052		818
Q13952	Nuclear transcription factor Y subunit gamma	NFYC	sp|Q13952|NFYC_HUMAN Nuclear transcription factor Y subunit gamma OS=Homo sapiens GN=NFYC PE=1 SV=3	1	1	2.6	50.302	458	0.0016234	8.4929	140790	140790	0		-1.30351		821
Q14137	Ribosome biogenesis protein BOP1	BOP1	sp|Q14137|BOP1_HUMAN Ribosome biogenesis protein BOP1 OS=Homo sapiens GN=BOP1 PE=1 SV=2	1	1	1.3	83.629	746	0.0071124	6.0971	36611	36611	0		-3.24671		824
Q14146	Unhealthy ribosome biogenesis protein 2 homolog	URB2	sp|Q14146|URB2_HUMAN Unhealthy ribosome biogenesis protein 2 homolog OS=Homo sapiens GN=URB2 PE=2 SV=2	1	1	0.8	170.54	1524	0.0016434	9.1731	28890	28890	0		-3.58841		825
Q14152	Eukaryotic translation initiation factor 3 subunit A	EIF3A	sp|Q14152|EIF3A_HUMAN Eukaryotic translation initiation factor 3 subunit A OS=Homo sapiens GN=EIF3A PE=1 SV=1	1	1	0.9	166.57	1382	0.0071073	6.0954	11645	11645	0		-4.89927		826
Q14257	Reticulocalbin-2	RCN2	sp|Q14257|RCN2_HUMAN Reticulocalbin-2 OS=Homo sapiens GN=RCN2 PE=1 SV=1	1	6	26.2	36.876	317	0	110.61	3938100	3938100	0		3.50237		835
Q14318	Peptidyl-prolyl cis-trans isomerase FKBP8	FKBP8	sp|Q14318|FKBP8_HUMAN Peptidyl-prolyl cis-trans isomerase FKBP8 OS=Homo sapiens GN=FKBP8 PE=1 SV=2	1	2	5.8	44.561	412	0.0010352	14.425	236540	236540	0		-0.55497		837
Q14494	Nuclear factor erythroid 2-related factor 1	NFE2L1	sp|Q14494|NF2L1_HUMAN Nuclear factor erythroid 2-related factor 1 OS=Homo sapiens GN=NFE2L1 PE=1 SV=1	1	2	4	84.703	772	0.0016625	10.691	77743	77743	0		-2.16027		839
Q14667	Protein KIAA0100	KIAA0100	sp|Q14667|K0100_HUMAN Protein KIAA0100 OS=Homo sapiens GN=KIAA0100 PE=1 SV=3	1	3	1.8	253.7	2235	0	16.704	28640	28640	0		-3.60095		844
Q14739	Lamin-B receptor	LBR	sp|Q14739|LBR_HUMAN Lamin-B receptor OS=Homo sapiens GN=LBR PE=1 SV=2	1	6	8.5	70.702	615	0	63.656	1179600	1179600	0		1.76317		852
Q14C86	GTPase-activating protein and VPS9 domain-containing protein 1	GAPVD1	sp|Q14C86|GAPD1_HUMAN GTPase-activating protein and VPS9 domain-containing protein 1 OS=Homo sapiens GN=GAPVD1 PE=1 SV=2	1	1	0.7	164.98	1478	0.0050143	6.1565	0	0	0				855
Q15007	Pre-mRNA-splicing regulator WTAP	WTAP	sp|Q15007|FL2D_HUMAN Pre-mRNA-splicing regulator WTAP OS=Homo sapiens GN=WTAP PE=1 SV=2	1	4	12.9	44.243	396	0	32.021	276660	276660	0		-0.328939		856
Q15013	MAD2L1-binding protein	MAD2L1BP	sp|Q15013|MD2BP_HUMAN MAD2L1-binding protein OS=Homo sapiens GN=MAD2L1BP PE=1 SV=1	1	1	4.7	31.051	274	0.0022883	6.7304	86015	86015	0		-2.01439		858
Q15036	Sorting nexin-17	SNX17	sp|Q15036|SNX17_HUMAN Sorting nexin-17 OS=Homo sapiens GN=SNX17 PE=1 SV=1	1	1	2.6	52.901	470	0.00087873	11.214	40623	40623	0		-3.09669		862
Q15051	IQ calmodulin-binding motif-containing protein 1	IQCB1	sp|Q15051|IQCB1_HUMAN IQ calmodulin-binding motif-containing protein 1 OS=Homo sapiens GN=IQCB1 PE=1 SV=1	1	1	2	68.928	598	0.0015798	7.4332	67134	67134	0		-2.37194		866
Q15056	Eukaryotic translation initiation factor 4H	EIF4H	sp|Q15056|IF4H_HUMAN Eukaryotic translation initiation factor 4H OS=Homo sapiens GN=EIF4H PE=1 SV=5	1	3	14.5	27.385	248	0	17.454	243470	243470	0		-0.513309		867
Q15154	Pericentriolar material 1 protein	PCM1	sp|Q15154|PCM1_HUMAN Pericentriolar material 1 protein OS=Homo sapiens GN=PCM1 PE=1 SV=4	1	3	1.9	228.53	2024	0	17.906	50248	50248	0		-2.78992		870
Q15293	Reticulocalbin-1	RCN1	sp|Q15293|RCN1_HUMAN Reticulocalbin-1 OS=Homo sapiens GN=RCN1 PE=1 SV=1	1	3	11.5	38.89	331	0	19.66	302270	302270	0		-0.201216		874
Q15427	Splicing factor 3B subunit 4	SF3B4	sp|Q15427|SF3B4_HUMAN Splicing factor 3B subunit 4 OS=Homo sapiens GN=SF3B4 PE=1 SV=1	1	1	3.3	44.385	424	0.001642	9.169	105050	105050	0		-1.72598		883
Q15428	Splicing factor 3A subunit 2	SF3A2	sp|Q15428|SF3A2_HUMAN Splicing factor 3A subunit 2 OS=Homo sapiens GN=SF3A2 PE=1 SV=2	1	4	11.9	49.255	464	0	27.366	1630500	1630500	0		2.23019		884
Q15477	Helicase SKI2W	SKIV2L	sp|Q15477|SKIV2_HUMAN Helicase SKI2W OS=Homo sapiens GN=SKIV2L PE=1 SV=3	1	3	3.9	137.75	1246	0	17.208	151590	151590	0		-1.19688		887
Q15545	Transcription initiation factor TFIID subunit 7	TAF7	sp|Q15545|TAF7_HUMAN Transcription initiation factor TFIID subunit 7 OS=Homo sapiens GN=TAF7 PE=1 SV=1	1	1	3.4	40.259	349	0.00089606	11.414	121850	121850	0		-1.51195		889
Q15642	Cdc42-interacting protein 4	TRIP10	sp|Q15642|CIP4_HUMAN Cdc42-interacting protein 4 OS=Homo sapiens GN=TRIP10 PE=1 SV=3	1	1	3	68.351	601	0.0022866	6.724	61465	61465	0		-2.49922		890
Q15645	Pachytene checkpoint protein 2 homolog	TRIP13	sp|Q15645|PCH2_HUMAN Pachytene checkpoint protein 2 homolog OS=Homo sapiens GN=TRIP13 PE=1 SV=2	1	4	12.3	48.55	432	0	31.886	541580	541580	0		0.640121		891
Q15750	TGF-beta-activated kinase 1 and MAP3K7-binding protein 1	TAB1	sp|Q15750|TAB1_HUMAN TGF-beta-activated kinase 1 and MAP3K7-binding protein 1 OS=Homo sapiens GN=TAB1 PE=1 SV=1	1	2	3.6	54.643	504	0.0016722	10.763	106100	106100	0		-1.71163		893
Q16186	Proteasomal ubiquitin receptor ADRM1	ADRM1	sp|Q16186|ADRM1_HUMAN Proteasomal ubiquitin receptor ADRM1 OS=Homo sapiens GN=ADRM1 PE=1 SV=2	1	1	3.9	42.153	407	0.0036364	6.2795	129580	129580	0		-1.42321		896
Q16543	Hsp90 co-chaperone Cdc37;Hsp90 co-chaperone Cdc37, N-terminally processed	CDC37	sp|Q16543|CDC37_HUMAN Hsp90 co-chaperone Cdc37 OS=Homo sapiens GN=CDC37 PE=1 SV=1	1	1	2.4	44.468	378	0.0016129	7.91	183710	183710	0		-0.919624		899
Q16658	Fascin	FSCN1	sp|Q16658|FSCN1_HUMAN Fascin OS=Homo sapiens GN=FSCN1 PE=1 SV=3	1	2	5.1	54.529	493	0.00093458	11.823	117940	117940	0		-1.559		902
Q16769	Glutaminyl-peptide cyclotransferase	QPCT	sp|Q16769|QPCT_HUMAN Glutaminyl-peptide cyclotransferase OS=Homo sapiens GN=QPCT PE=1 SV=1	1	1	3	40.876	361	0.0023024	6.8909	0	0	0				903
Q16795	NADH dehydrogenase [ubiquinone] 1 alpha subcomplex subunit 9, mitochondrial	NDUFA9	sp|Q16795|NDUA9_HUMAN NADH dehydrogenase [ubiquinone] 1 alpha subcomplex subunit 9, mitochondrial OS=Homo sapiens GN=NDUFA9 PE=1 SV=2	1	3	11.4	42.509	377	0	18.638	245440	245440	0		-0.501684		905
Q16850	Lanosterol 14-alpha demethylase	CYP51A1	sp|Q16850|CP51A_HUMAN Lanosterol 14-alpha demethylase OS=Homo sapiens GN=CYP51A1 PE=1 SV=3	1	2	4.8	56.805	503	0.00087566	11.177	113210	113210	0		-1.61805		906
Q2TAY7	WD40 repeat-containing protein SMU1;WD40 repeat-containing protein SMU1, N-terminally processed	SMU1	sp|Q2TAY7|SMU1_HUMAN WD40 repeat-containing protein SMU1 OS=Homo sapiens GN=SMU1 PE=1 SV=2	1	1	4.7	57.543	513	0.0036023	6.2051	44280	44280	0		-2.97233		911
Q31612;Q95604	HLA class I histocompatibility antigen, B-73 alpha chain;HLA class I histocompatibility antigen, Cw-17 alpha chain	HLA-B;HLA-C	sp|Q31612|1B73_HUMAN HLA class I histocompatibility antigen, B-73 alpha chain OS=Homo sapiens GN=HLA-B PE=1 SV=1;sp|Q95604|1C17_HUMAN HLA class I histocompatibility antigen, Cw-17 alpha chain OS=Homo sapiens GN=HLA-C PE=1 SV=1	2	4	18.5	40.435	363	0	30.308	326900	326900	0		-0.0882053		912
Q562E7	WD repeat-containing protein 81	WDR81	sp|Q562E7|WDR81_HUMAN WD repeat-containing protein 81 OS=Homo sapiens GN=WDR81 PE=1 SV=2	1	2	1.2	211.69	1941	0.00089847	11.424	23872	23872	0		-3.86366		919
Q567U6	Coiled-coil domain-containing protein 93	CCDC93	sp|Q567U6|CCD93_HUMAN Coiled-coil domain-containing protein 93 OS=Homo sapiens GN=CCDC93 PE=1 SV=2	1	1	1.9	73.197	631	0.0015823	7.4531	0	0	0				920
Q5BJH7	Protein YIF1B	YIF1B	sp|Q5BJH7|YIF1B_HUMAN Protein YIF1B OS=Homo sapiens GN=YIF1B PE=1 SV=1	1	1	4.1	34.435	314	0.0015504	7.0466	0	0	0				922
Q5HYK3	2-methoxy-6-polyprenyl-1,4-benzoquinol methylase, mitochondrial	COQ5	sp|Q5HYK3|COQ5_HUMAN 2-methoxy-6-polyprenyl-1,4-benzoquinol methylase, mitochondrial OS=Homo sapiens GN=COQ5 PE=1 SV=2	1	1	3.1	37.14	327	0.0077301	6.036	0	0	0				925
Q5JPH6	Probable glutamate--tRNA ligase, mitochondrial	EARS2	sp|Q5JPH6|SYEM_HUMAN Probable glutamate--tRNA ligase, mitochondrial OS=Homo sapiens GN=EARS2 PE=1 SV=2	1	1	1.9	58.688	523	0.0070822	6.0641	42648	42648	0		-3.0265		926
Q5JTW2	Centrosomal protein of 78 kDa	CEP78	sp|Q5JTW2|CEP78_HUMAN Centrosomal protein of 78 kDa OS=Homo sapiens GN=CEP78 PE=1 SV=1	1	1	1.6	76.396	689	0.0077085	6.0263	51169	51169	0		-2.76371		927
Q5SWA1	Protein phosphatase 1 regulatory subunit 15B	PPP1R15B	sp|Q5SWA1|PR15B_HUMAN Protein phosphatase 1 regulatory subunit 15B OS=Homo sapiens GN=PPP1R15B PE=1 SV=1	1	2	3.5	79.151	713	0.00097561	12.411	164760	164760	0		-1.07669		932
Q5SY16	Polynucleotide 5-hydroxyl-kinase NOL9	NOL9	sp|Q5SY16|NOL9_HUMAN Polynucleotide 5-hydroxyl-kinase NOL9 OS=Homo sapiens GN=NOL9 PE=1 SV=1	1	1	1.6	79.322	702	0.0090028	5.9836	33828	33828	0		-3.36076		933
Q5T160	Probable arginine--tRNA ligase, mitochondrial	RARS2	sp|Q5T160|SYRM_HUMAN Probable arginine--tRNA ligase, mitochondrial OS=Homo sapiens GN=RARS2 PE=1 SV=1	1	9	15.1	65.505	578	0	82.044	703190	703190	0		1.01686		934
Q5T447	E3 ubiquitin-protein ligase HECTD3	HECTD3	sp|Q5T447|HECD3_HUMAN E3 ubiquitin-protein ligase HECTD3 OS=Homo sapiens GN=HECTD3 PE=1 SV=1	1	3	4.9	97.112	861	0	16.813	49101	49101	0		-2.82323		936
Q5TCX8	Mitogen-activated protein kinase kinase kinase MLK4	MLK4	sp|Q5TCX8|M3KL4_HUMAN Mitogen-activated protein kinase kinase kinase MLK4 OS=Homo sapiens GN=MLK4 PE=1 SV=1	1	1	1.2	113.96	1036	0.0022624	6.5865	0	0	0				940
Q5TF58;H3BQV1;Q0D2I5	Intermediate filament family orphan 2;Intermediate filament family orphan 1	IFFO2;IFFO1	sp|Q5TF58|IFFO2_HUMAN Intermediate filament family orphan 2 OS=Homo sapiens GN=IFFO2 PE=2 SV=3;tr|H3BQV1|H3BQV1_HUMAN Uncharacterized protein (Fragment) OS=Homo sapiens PE=4 SV=1;sp|Q0D2I5|IFFO1_HUMAN Intermediate filament family orphan 1 OS=Homo sapiens G	3	3	4.3	57.327	517	0.0010482	16.052	600370	600370	0		0.788797		941
Q5XG92	Carboxylesterase 4A	CES4A	sp|Q5XG92|EST4A_HUMAN Carboxylesterase 4A OS=Homo sapiens GN=CES4A PE=2 SV=2	1	1	2.3	63.528	561	0.0076923	6.02	390980	390980	0		0.17004		947
Q658Y4	Protein FAM91A1	FAM91A1	sp|Q658Y4|F91A1_HUMAN Protein FAM91A1 OS=Homo sapiens GN=FAM91A1 PE=1 SV=3	1	1	1.6	93.908	838	0	23.533	58656	58656	0		-2.5667		950
Q66K74	Microtubule-associated protein 1S;MAP1S heavy chain;MAP1S light chain	MAP1S	sp|Q66K74|MAP1S_HUMAN Microtubule-associated protein 1S OS=Homo sapiens GN=MAP1S PE=1 SV=2	1	3	3.4	112.21	1059	0	18.637	123900	123900	0		-1.48788		951
Q68E01	Integrator complex subunit 3	INTS3	sp|Q68E01|INT3_HUMAN Integrator complex subunit 3 OS=Homo sapiens GN=INTS3 PE=1 SV=1	1	2	2.6	118.07	1043	0.00093985	11.838	36433	36433	0		-3.25374		954
Q69YN2	CWF19-like protein 1	CWF19L1	sp|Q69YN2|C19L1_HUMAN CWF19-like protein 1 OS=Homo sapiens GN=CWF19L1 PE=1 SV=2	1	1	2.2	60.618	538	0.0036576	6.3279	19477	19477	0		-4.15721		955
Q6AI08	HEAT repeat-containing protein 6	HEATR6	sp|Q6AI08|HEAT6_HUMAN HEAT repeat-containing protein 6 OS=Homo sapiens GN=HEATR6 PE=1 SV=1	1	3	2.9	128.78	1181	0	22.349	49359	49359	0		-2.81567		956
Q6IAN0	Dehydrogenase/reductase SDR family member 7B	DHRS7B	sp|Q6IAN0|DRS7B_HUMAN Dehydrogenase/reductase SDR family member 7B OS=Homo sapiens GN=DHRS7B PE=1 SV=2	1	1	4.6	35.119	325	0	17.874	188230	188230	0		-0.884558		958
Q6IQ26	DENN domain-containing protein 5A	DENND5A	sp|Q6IQ26|DEN5A_HUMAN DENN domain-containing protein 5A OS=Homo sapiens GN=DENND5A PE=1 SV=2	1	1	0.9	147.09	1287	0.0077519	6.046	352500	0	352500			2.57364	959
Q6NTF9	Rhomboid domain-containing protein 2	RHBDD2	sp|Q6NTF9|RHBD2_HUMAN Rhomboid domain-containing protein 2 OS=Homo sapiens GN=RHBDD2 PE=2 SV=2	1	1	4.4	39.202	364	0	26.043	396000	396000	0		0.188446		961
Q6NXE6	Armadillo repeat-containing protein 6	ARMC6	sp|Q6NXE6|ARMC6_HUMAN Armadillo repeat-containing protein 6 OS=Homo sapiens GN=ARMC6 PE=1 SV=2	1	6	19.2	54.141	501	0	119.86	980970	980970	0		1.49715		962
Q6P1J9	Parafibromin	CDC73	sp|Q6P1J9|CDC73_HUMAN Parafibromin OS=Homo sapiens GN=CDC73 PE=1 SV=1	1	1	1.7	60.576	531	0.001609	7.7867	35639	35639	0		-3.28553		963
Q6P1X5	Transcription initiation factor TFIID subunit 2	TAF2	sp|Q6P1X5|TAF2_HUMAN Transcription initiation factor TFIID subunit 2 OS=Homo sapiens GN=TAF2 PE=1 SV=3	1	2	1.9	136.97	1199	0.00095969	12.113	36585	36585	0		-3.24773		964
Q6P444	Mitochondrial fission regulator 2	MTFR2	sp|Q6P444|MTFR2_HUMAN Mitochondrial fission regulator 2 OS=Homo sapiens GN=MTFR2 PE=1 SV=2	1	3	9.4	43.384	385	0	18.634	120590	120590	0		-1.52694		968
Q6P5Z2	Serine/threonine-protein kinase N3	PKN3	sp|Q6P5Z2|PKN3_HUMAN Serine/threonine-protein kinase N3 OS=Homo sapiens GN=PKN3 PE=1 SV=1	1	1	1.1	99.419	889	0.0057184	6.1398	28537	28537	0		-3.60615		970
Q6PJ69	Tripartite motif-containing protein 65	TRIM65	sp|Q6PJ69|TRI65_HUMAN Tripartite motif-containing protein 65 OS=Homo sapiens GN=TRIM65 PE=1 SV=3	1	3	8.3	57.353	517	0	37.874	327580	327580	0		-0.085207		974
Q6PJG6	BRCA1-associated ATM activator 1	BRAT1	sp|Q6PJG6|BRAT1_HUMAN BRCA1-associated ATM activator 1 OS=Homo sapiens GN=BRAT1 PE=1 SV=2	1	2	4.3	88.118	821	0.0016821	10.815	58535	58535	0		-2.56968		975
Q6ZNB6	NF-X1-type zinc finger protein NFXL1	NFXL1	sp|Q6ZNB6|NFXL1_HUMAN NF-X1-type zinc finger protein NFXL1 OS=Homo sapiens GN=NFXL1 PE=1 SV=2	1	1	1.2	101.34	911	0.0022173	6.4075	35154	35154	0		-3.30529		982
Q6ZVX7	F-box only protein 50	NCCRP1	sp|Q6ZVX7|FBX50_HUMAN F-box only protein 50 OS=Homo sapiens GN=NCCRP1 PE=1 SV=1	1	1	4	30.847	275	0.0022506	6.5464	448800	448800	0		0.369019		983
Q709C8	Vacuolar protein sorting-associated protein 13C	VPS13C	sp|Q709C8|VP13C_HUMAN Vacuolar protein sorting-associated protein 13C OS=Homo sapiens GN=VPS13C PE=1 SV=1	1	2	0.6	422.39	3753	0.00095694	12.046	9259.3	9259.3	0		-5.23001		984
Q709F0	Acyl-CoA dehydrogenase family member 11	ACAD11	sp|Q709F0|ACD11_HUMAN Acyl-CoA dehydrogenase family member 11 OS=Homo sapiens GN=ACAD11 PE=1 SV=2	1	1	1.5	87.282	780	0.0015492	7.0415	27740	27740	0		-3.64701		985
Q71UM5	40S ribosomal protein S27-like	RPS27L	sp|Q71UM5|RS27L_HUMAN 40S ribosomal protein S27-like OS=Homo sapiens GN=RPS27L PE=1 SV=3	1	4	39.3	9.4771	84	0	26.471	6938100	6938100	0		4.31941		989
Q7L2H7	Eukaryotic translation initiation factor 3 subunit M	EIF3M	sp|Q7L2H7|EIF3M_HUMAN Eukaryotic translation initiation factor 3 subunit M OS=Homo sapiens GN=EIF3M PE=1 SV=1	1	1	5.3	42.502	374	0.0016077	7.7647	679110	679110	0		0.966591		992
Q7L3T8	Probable proline--tRNA ligase, mitochondrial	PARS2	sp|Q7L3T8|SYPM_HUMAN Probable proline--tRNA ligase, mitochondrial OS=Homo sapiens GN=PARS2 PE=1 SV=1	1	1	2.7	53.262	475	0.0016155	7.9826	51131	51131	0		-2.76478		993
Q7L5D6	Golgi to ER traffic protein 4 homolog	GET4	sp|Q7L5D6|GET4_HUMAN Golgi to ER traffic protein 4 homolog OS=Homo sapiens GN=GET4 PE=1 SV=1	1	5	19.6	36.504	327	0	64.514	1970500	1970500	0		2.50344		995
Q7L5Y9	Macrophage erythroblast attacher	MAEA	sp|Q7L5Y9|MAEA_HUMAN Macrophage erythroblast attacher OS=Homo sapiens GN=MAEA PE=1 SV=1	1	1	2.3	45.287	396	0.0023166	6.9926	148730	148730	0		-1.22436		996
Q7LBC6	Lysine-specific demethylase 3B	KDM3B	sp|Q7LBC6|KDM3B_HUMAN Lysine-specific demethylase 3B OS=Homo sapiens GN=KDM3B PE=1 SV=2	1	4	2.8	191.58	1761	0	22.64	64358	64358	0		-2.43286		997
Q7Z333	Probable helicase senataxin	SETX	sp|Q7Z333|SETX_HUMAN Probable helicase senataxin OS=Homo sapiens GN=SETX PE=1 SV=4	1	1	0.5	302.88	2677	0.0043103	6.1923	7793.7	7793.7	0		-5.4786		999
Q7Z3B4	Nucleoporin p54	NUP54	sp|Q7Z3B4|NUP54_HUMAN Nucleoporin p54 OS=Homo sapiens GN=NUP54 PE=1 SV=2	1	2	4.9	55.435	507	0.00095238	11.999	115350	115350	0		-1.59104		1000
Q7Z4H3	HD domain-containing protein 2	HDDC2	sp|Q7Z4H3|HDDC2_HUMAN HD domain-containing protein 2 OS=Homo sapiens GN=HDDC2 PE=1 SV=1	1	1	6.9	23.39	204	0.0023095	6.9637	0	0	0				1005
Q7Z569	BRCA1-associated protein	BRAP	sp|Q7Z569|BRAP_HUMAN BRCA1-associated protein OS=Homo sapiens GN=BRAP PE=1 SV=2	1	1	1.5	67.304	592	0.0022556	6.5662	46194	46194	0		-2.91128		1008
Q7Z7C8	Transcription initiation factor TFIID subunit 8	TAF8	sp|Q7Z7C8|TAF8_HUMAN Transcription initiation factor TFIID subunit 8 OS=Homo sapiens GN=TAF8 PE=1 SV=1	1	1	4.8	34.262	310	0.0022573	6.5679	41808	41808	0		-3.0552		1011
Q86TI2	Dipeptidyl peptidase 9	DPP9	sp|Q86TI2|DPP9_HUMAN Dipeptidyl peptidase 9 OS=Homo sapiens GN=DPP9 PE=1 SV=3	1	2	2.9	98.262	863	0.00085763	11.043	66598	66598	0		-2.3835		1015
Q86UW6	NEDD4-binding protein 2	N4BP2	sp|Q86UW6|N4BP2_HUMAN NEDD4-binding protein 2 OS=Homo sapiens GN=N4BP2 PE=1 SV=2	1	1	0.7	198.8	1770	0.0022222	6.4141	10821	10821	0		-5.00515		1019
Q86VS8	Protein Hook homolog 3	HOOK3	sp|Q86VS8|HOOK3_HUMAN Protein Hook homolog 3 OS=Homo sapiens GN=HOOK3 PE=1 SV=2	1	2	2.9	83.125	718	0.0016978	10.958	365620	0	365620			2.62636	1022
Q86XA9	HEAT repeat-containing protein 5A	HEATR5A	sp|Q86XA9|HTR5A_HUMAN HEAT repeat-containing protein 5A OS=Homo sapiens GN=HEATR5A PE=1 SV=2	1	1	0.6	222	2040	0.0022455	6.5178	7370.6	7370.6	0		-5.55913		1023
Q8IUR6	CREB3 regulatory factor	CREBRF	sp|Q8IUR6|CRERF_HUMAN CREB3 regulatory factor OS=Homo sapiens GN=CREBRF PE=1 SV=2	1	1	1.4	72.148	639	0.0022989	6.8539	493350	493350	0		0.505558		1030
Q8IVF4	Dynein heavy chain 10, axonemal	DNAH10	sp|Q8IVF4|DYH10_HUMAN Dynein heavy chain 10, axonemal OS=Homo sapiens GN=DNAH10 PE=1 SV=4	1	1	0.2	514.83	4471	0.0076977	6.0252	14515	0	14515			-2.02837	1031
Q8IWA4	Mitofusin-1	MFN1	sp|Q8IWA4|MFN1_HUMAN Mitofusin-1 OS=Homo sapiens GN=MFN1 PE=1 SV=2	1	3	5.1	84.099	741	0	19.091	144520	144520	0		-1.26579		1034
Q8IWR0	Zinc finger CCCH domain-containing protein 7A	ZC3H7A	sp|Q8IWR0|Z3H7A_HUMAN Zinc finger CCCH domain-containing protein 7A OS=Homo sapiens GN=ZC3H7A PE=1 SV=1	1	2	2.8	110.54	971	0.0016964	10.935	61858	61858	0		-2.49002		1035
Q8IWZ6	Bardet-Biedl syndrome 7 protein	BBS7	sp|Q8IWZ6|BBS7_HUMAN Bardet-Biedl syndrome 7 protein OS=Homo sapiens GN=BBS7 PE=1 SV=2	1	2	3.6	80.352	715	0.00097847	12.454	47813	47813	0		-2.86158		1038
Q8IX18	Probable ATP-dependent RNA helicase DHX40	DHX40	sp|Q8IX18|DHX40_HUMAN Probable ATP-dependent RNA helicase DHX40 OS=Homo sapiens GN=DHX40 PE=1 SV=2	1	1	1.5	88.559	779	0.0016273	8.7364	54923	54923	0		-2.66157		1039
Q8IX90	Spindle and kinetochore-associated protein 3	SKA3	sp|Q8IX90|SKA3_HUMAN Spindle and kinetochore-associated protein 3 OS=Homo sapiens GN=SKA3 PE=1 SV=2	1	3	8.7	46.359	412	0	21.193	112920	112920	0		-1.62175		1040
Q8IXB1	DnaJ homolog subfamily C member 10	DNAJC10	sp|Q8IXB1|DJC10_HUMAN DnaJ homolog subfamily C member 10 OS=Homo sapiens GN=DNAJC10 PE=1 SV=2	1	5	7.6	91.079	793	0	29.158	492900	492900	0		0.504242		1041
Q8IXI1	Mitochondrial Rho GTPase 2	RHOT2	sp|Q8IXI1|MIRO2_HUMAN Mitochondrial Rho GTPase 2 OS=Homo sapiens GN=RHOT2 PE=1 SV=2	1	2	4	68.117	618	0.00096246	12.158	167840	167840	0		-1.04997		1042
Q8IYD8	Fanconi anemia group M protein	FANCM	sp|Q8IYD8|FANCM_HUMAN Fanconi anemia group M protein OS=Homo sapiens GN=FANCM PE=1 SV=2	1	2	1.3	232.19	2048	0.00087719	11.197	12699	12699	0		-4.77427		1044
Q8IYI6	Exocyst complex component 8	EXOC8	sp|Q8IYI6|EXOC8_HUMAN Exocyst complex component 8 OS=Homo sapiens GN=EXOC8 PE=1 SV=2	1	2	3.7	81.798	725	0.00094967	11.925	63266	63266	0		-2.45755		1045
Q8N1G4	Leucine-rich repeat-containing protein 47	LRRC47	sp|Q8N1G4|LRC47_HUMAN Leucine-rich repeat-containing protein 47 OS=Homo sapiens GN=LRRC47 PE=1 SV=1	1	2	3.9	63.472	583	0.00099108	12.802	93198	93198	0		-1.89868		1050
Q8N357	Solute carrier family 35 member F6	SLC35F6	sp|Q8N357|S35F6_HUMAN Solute carrier family 35 member F6 OS=Homo sapiens GN=SLC35F6 PE=1 SV=1	1	1	3.2	40.214	371	0.0016327	9.0142	120030	120030	0		-1.53366		1052
Q8N3C0	Activating signal cointegrator 1 complex subunit 3	ASCC3	sp|Q8N3C0|ASCC3_HUMAN Activating signal cointegrator 1 complex subunit 3 OS=Homo sapiens GN=ASCC3 PE=1 SV=3	1	5	2.8	251.46	2202	0	30.883	64540	64540	0		-2.42879		1053
Q8N4T8	Carbonyl reductase family member 4	CBR4	sp|Q8N4T8|CBR4_HUMAN Carbonyl reductase family member 4 OS=Homo sapiens GN=CBR4 PE=1 SV=3	1	1	5.1	25.301	237	0.0022779	6.6823	38357	38357	0		-3.17949		1055
Q8N5D0	WD and tetratricopeptide repeats protein 1	WDTC1	sp|Q8N5D0|WDTC1_HUMAN WD and tetratricopeptide repeats protein 1 OS=Homo sapiens GN=WDTC1 PE=1 SV=2	1	2	3.7	75.919	677	0.00090171	11.486	102190	102190	0		-1.7658		1057
Q8N5I9	Uncharacterized protein C12orf45	C12orf45	sp|Q8N5I9|CL045_HUMAN Uncharacterized protein C12orf45 OS=Homo sapiens GN=C12orf45 PE=1 SV=2	1	1	6.5	20.123	185	0.0089717	5.9713	77278	77278	0		-2.16892		1058
Q8N5U6	RING finger protein 10	RNF10	sp|Q8N5U6|RNF10_HUMAN RING finger protein 10 OS=Homo sapiens GN=RNF10 PE=1 SV=2	1	2	3	89.926	811	0.00093633	11.826	59689	59689	0		-2.54152		1059
Q8N684	Cleavage and polyadenylation specificity factor subunit 7	CPSF7	sp|Q8N684|CPSF7_HUMAN Cleavage and polyadenylation specificity factor subunit 7 OS=Homo sapiens GN=CPSF7 PE=1 SV=1	1	7	22.1	52.049	471	0	47.853	634470	634470	0		0.868498		1060
Q8NB46	Serine/threonine-protein phosphatase 6 regulatory ankyrin repeat subunit C	ANKRD52	sp|Q8NB46|ANR52_HUMAN Serine/threonine-protein phosphatase 6 regulatory ankyrin repeat subunit C OS=Homo sapiens GN=ANKRD52 PE=1 SV=3	1	2	1.8	115.08	1076	0.00087184	11.141	64426	64426	0		-2.43134		1063
Q8NBM4	Ubiquitin-associated domain-containing protein 2	UBAC2	sp|Q8NBM4|UBAC2_HUMAN Ubiquitin-associated domain-containing protein 2 OS=Homo sapiens GN=UBAC2 PE=1 SV=1	1	4	16.3	38.963	344	0	31.549	560590	560590	0		0.689892		1064
Q8NCA5	Protein FAM98A	FAM98A	sp|Q8NCA5|FA98A_HUMAN Protein FAM98A OS=Homo sapiens GN=FAM98A PE=1 SV=1	1	1	2.9	55.4	519	0.0016221	8.4157	43248	43248	0		-3.00635		1067
Q8NCJ5	SPRY domain-containing protein 3	SPRYD3	sp|Q8NCJ5|SPRY3_HUMAN SPRY domain-containing protein 3 OS=Homo sapiens GN=SPRYD3 PE=1 SV=2	1	1	2.5	49.693	442	0.0083391	5.9943	43143	43143	0		-3.00986		1068
Q8NEL9	Phospholipase DDHD1	DDHD1	sp|Q8NEL9|DDHD1_HUMAN Phospholipase DDHD1 OS=Homo sapiens GN=DDHD1 PE=1 SV=2	1	1	1.6	100.43	900	0.0036523	6.3219	53385	53385	0		-2.70255		1074
Q8NEY1	Neuron navigator 1	NAV1	sp|Q8NEY1|NAV1_HUMAN Neuron navigator 1 OS=Homo sapiens GN=NAV1 PE=1 SV=2	1	2	1.4	202.47	1877	0.00098912	12.764	16085	16085	0		-4.43327		1075
Q8NF37	Lysophosphatidylcholine acyltransferase 1	LPCAT1	sp|Q8NF37|PCAT1_HUMAN Lysophosphatidylcholine acyltransferase 1 OS=Homo sapiens GN=LPCAT1 PE=1 SV=2	1	4	8.4	59.151	534	0	29.061	423010	423010	0		0.283638		1076
Q8NG08	DNA helicase B	HELB	sp|Q8NG08|HELB_HUMAN DNA helicase B OS=Homo sapiens GN=HELB PE=1 SV=2	1	2	2.1	123.25	1087	0.00088889	11.363	18343	18343	0		-4.24375		1078
Q8NG31	Protein CASC5	CASC5	sp|Q8NG31|CASC5_HUMAN Protein CASC5 OS=Homo sapiens GN=CASC5 PE=1 SV=3	1	2	1.1	265.39	2342	0.0016639	10.694	0	0	0				1079
Q8NI60	Atypical kinase ADCK3, mitochondrial	ADCK3	sp|Q8NI60|ADCK3_HUMAN Atypical kinase ADCK3, mitochondrial OS=Homo sapiens GN=ADCK3 PE=1 SV=1	1	7	14.4	71.949	647	0	157.95	1494100	1494100	0		2.10415		1084
Q8TAF3	WD repeat-containing protein 48	WDR48	sp|Q8TAF3|WDR48_HUMAN WD repeat-containing protein 48 OS=Homo sapiens GN=WDR48 PE=1 SV=1	1	3	6.1	76.21	677	0	16.831	136660	136660	0		-1.34646		1085
Q8TB52	F-box only protein 30	FBXO30	sp|Q8TB52|FBX30_HUMAN F-box only protein 30 OS=Homo sapiens GN=FBXO30 PE=1 SV=3	1	1	1.9	82.303	745	0.0016584	10.551	0	0	0				1086
Q8TBM8	DnaJ homolog subfamily B member 14	DNAJB14	sp|Q8TBM8|DJB14_HUMAN DnaJ homolog subfamily B member 14 OS=Homo sapiens GN=DNAJB14 PE=1 SV=1	1	1	2.9	42.515	379	0.0089965	5.9836	20461	20461	0		-4.08611		1087
Q8TC12;H0YIZ8	Retinol dehydrogenase 11	RDH11	sp|Q8TC12|RDH11_HUMAN Retinol dehydrogenase 11 OS=Homo sapiens GN=RDH11 PE=1 SV=2;tr|H0YIZ8|H0YIZ8_HUMAN Uncharacterized protein (Fragment) OS=Homo sapiens PE=4 SV=1	2	2	8.2	35.386	318	0.00092678	11.758	142050	142050	0		-1.29066		1089
Q8TCS8	Polyribonucleotide nucleotidyltransferase 1, mitochondrial	PNPT1	sp|Q8TCS8|PNPT1_HUMAN Polyribonucleotide nucleotidyltransferase 1, mitochondrial OS=Homo sapiens GN=PNPT1 PE=1 SV=2	1	1	1.7	85.95	783	0.0036496	6.3147	23086	23086	0		-3.91196		1092
Q8TDB6	E3 ubiquitin-protein ligase DTX3L	DTX3L	sp|Q8TDB6|DTX3L_HUMAN E3 ubiquitin-protein ligase DTX3L OS=Homo sapiens GN=DTX3L PE=1 SV=1	1	1	2	83.553	740	0.0015588	7.1401	54922	54922	0		-2.6616		1095
Q8TDJ6	DmX-like protein 2	DMXL2	sp|Q8TDJ6|DMXL2_HUMAN DmX-like protein 2 OS=Homo sapiens GN=DMXL2 PE=1 SV=2	1	3	1.3	339.64	3036	0	17.448	21571	21571	0		-4.00989		1096
Q8TDY2	RB1-inducible coiled-coil protein 1	RB1CC1	sp|Q8TDY2|RBCC1_HUMAN RB1-inducible coiled-coil protein 1 OS=Homo sapiens GN=RB1CC1 PE=1 SV=3	1	1	0.5	183.09	1594	0.0070671	6.0572	0	0	0				1097
Q8TEY7	Ubiquitin carboxyl-terminal hydrolase 33	USP33	sp|Q8TEY7|UBP33_HUMAN Ubiquitin carboxyl-terminal hydrolase 33 OS=Homo sapiens GN=USP33 PE=1 SV=2	1	1	1.3	106.73	942	0.0036075	6.2307	14640	14640	0		-4.56907		1101
Q8WTW3	Conserved oligomeric Golgi complex subunit 1	COG1	sp|Q8WTW3|COG1_HUMAN Conserved oligomeric Golgi complex subunit 1 OS=Homo sapiens GN=COG1 PE=1 SV=1	1	2	2.4	108.98	980	0.00088106	11.245	31369	31369	0		-3.46964		1103
Q8WU79	Stromal membrane-associated protein 2	SMAP2	sp|Q8WU79|SMAP2_HUMAN Stromal membrane-associated protein 2 OS=Homo sapiens GN=SMAP2 PE=1 SV=1	1	1	3	46.785	429	0.0070922	6.0691	73904	73904	0		-2.23333		1104
Q8WVV4	Protein POF1B	POF1B	sp|Q8WVV4|POF1B_HUMAN Protein POF1B OS=Homo sapiens GN=POF1B PE=1 SV=3	1	1	1.7	68.064	589	0.0036049	6.215	47015	47015	0		-2.88586		1107
Q8WVX9	Fatty acyl-CoA reductase 1	FAR1	sp|Q8WVX9|FACR1_HUMAN Fatty acyl-CoA reductase 1 OS=Homo sapiens GN=FAR1 PE=1 SV=1	1	13	29.5	59.356	515	0	199.56	3350700	3350700	0		3.26934		1108
Q8WW22	DnaJ homolog subfamily A member 4	DNAJA4	sp|Q8WW22|DNJA4_HUMAN DnaJ homolog subfamily A member 4 OS=Homo sapiens GN=DNAJA4 PE=1 SV=1	1	1	2	44.797	397	0.0071174	6.1021	2723300	2723300	0		2.97023		1109
Q8WWC4	Uncharacterized protein C2orf47, mitochondrial	C2orf47	sp|Q8WWC4|CB047_HUMAN Uncharacterized protein C2orf47, mitochondrial OS=Homo sapiens GN=C2orf47 PE=1 SV=1	1	3	11.3	32.544	291	0	21.112	422250	422250	0		0.281044		1110
Q8WXD5	Gem-associated protein 6	GEMIN6	sp|Q8WXD5|GEMI6_HUMAN Gem-associated protein 6 OS=Homo sapiens GN=GEMIN6 PE=1 SV=1	1	1	7.8	18.824	167	0.0050107	6.1506	151270	151270	0		-1.19993		1114
Q92522	Histone H1x	H1FX	sp|Q92522|H1X_HUMAN Histone H1x OS=Homo sapiens GN=H1FX PE=1 SV=1	1	1	4.7	22.487	213	0.0015898	7.5112	127300	127300	0		-1.44882		1117
Q92526	T-complex protein 1 subunit zeta-2	CCT6B	sp|Q92526|TCPW_HUMAN T-complex protein 1 subunit zeta-2 OS=Homo sapiens GN=CCT6B PE=1 SV=5	1	6	11.3	57.821	530	0.00088183	11.245	558930	558930	0		0.685614		1118
Q92538	Golgi-specific brefeldin A-resistance guanine nucleotide exchange factor 1	GBF1	sp|Q92538|GBF1_HUMAN Golgi-specific brefeldin A-resistance guanine nucleotide exchange factor 1 OS=Homo sapiens GN=GBF1 PE=1 SV=2	1	2	1.6	206.44	1859	0.0009009	11.482	26086	26086	0		-3.73571		1119
Q92615	La-related protein 4B	LARP4B	sp|Q92615|LAR4B_HUMAN La-related protein 4B OS=Homo sapiens GN=LARP4B PE=1 SV=3	1	1	2.3	80.551	738	0.0050072	6.1483	59071	59071	0		-2.55653		1124
Q92922;Q8TAQ2	SWI/SNF complex subunit SMARCC1	SMARCC1	sp|Q92922|SMRC1_HUMAN SWI/SNF complex subunit SMARCC1 OS=Homo sapiens GN=SMARCC1 PE=1 SV=3	2	4	4.3	122.87	1105	0	30.914	210750	210750	0		-0.721521		1134
Q93009	Ubiquitin carboxyl-terminal hydrolase 7	USP7	sp|Q93009|UBP7_HUMAN Ubiquitin carboxyl-terminal hydrolase 7 OS=Homo sapiens GN=USP7 PE=1 SV=2	1	2	2.3	128.3	1102	0.00094429	11.867	38334	38334	0		-3.18036		1138
Q969G3	SWI/SNF-related matrix-associated actin-dependent regulator of chromatin subfamily E member 1	SMARCE1	sp|Q969G3|SMCE1_HUMAN SWI/SNF-related matrix-associated actin-dependent regulator of chromatin subfamily E member 1 OS=Homo sapiens GN=SMARCE1 PE=1 SV=2	1	1	3.2	46.649	411	0.0036337	6.279	54436	54436	0		-2.67442		1140
Q969M3	Protein YIPF5	YIPF5	sp|Q969M3|YIPF5_HUMAN Protein YIPF5 OS=Homo sapiens GN=YIPF5 PE=1 SV=1	1	1	4.7	27.989	257	0.0023041	6.8956	333840	333840	0		-0.0578976		1141
Q969V3	Nicalin	NCLN	sp|Q969V3|NCLN_HUMAN Nicalin OS=Homo sapiens GN=NCLN PE=1 SV=2	1	1	2.5	62.974	563	0.0089593	5.9646	72686	72686	0		-2.25731		1142
Q96AG4	Leucine-rich repeat-containing protein 59	LRRC59	sp|Q96AG4|LRC59_HUMAN Leucine-rich repeat-containing protein 59 OS=Homo sapiens GN=LRRC59 PE=1 SV=1	1	1	3.9	34.93	307	0.002271	6.6396	144240	0	144240			1.28448	1144
Q96AP0	Adrenocortical dysplasia protein homolog	ACD	sp|Q96AP0|ACD_HUMAN Adrenocortical dysplasia protein homolog OS=Homo sapiens GN=ACD PE=1 SV=3	1	1	2.4	57.733	544	0.0016103	7.8474	57361	57361	0		-2.59891		1145
Q96C19	EF-hand domain-containing protein D2	EFHD2	sp|Q96C19|EFHD2_HUMAN EF-hand domain-containing protein D2 OS=Homo sapiens GN=EFHD2 PE=1 SV=1	1	2	10	26.697	240	0.00087642	11.189	165680	165680	0		-1.06866		1148
Q96CN7	Isochorismatase domain-containing protein 1	ISOC1	sp|Q96CN7|ISOC1_HUMAN Isochorismatase domain-containing protein 1 OS=Homo sapiens GN=ISOC1 PE=1 SV=3	1	3	13.4	32.236	298	0	23.859	347510	347510	0		0		1149
Q96CS3	FAS-associated factor 2	FAF2	sp|Q96CS3|FAF2_HUMAN FAS-associated factor 2 OS=Homo sapiens GN=FAF2 PE=1 SV=2	1	3	6.7	52.623	445	0	18.439	297430	297430	0		-0.224504		1150
Q96CW1	AP-2 complex subunit mu	AP2M1	sp|Q96CW1|AP2M1_HUMAN AP-2 complex subunit mu OS=Homo sapiens GN=AP2M1 PE=1 SV=2	1	2	7.1	49.654	435	0.00091659	11.604	278970	278970	0		-0.316944		1151
Q96EP0	E3 ubiquitin-protein ligase RNF31	RNF31	sp|Q96EP0|RNF31_HUMAN E3 ubiquitin-protein ligase RNF31 OS=Homo sapiens GN=RNF31 PE=1 SV=1	1	1	1.2	119.65	1072	0.0050251	6.1695	9491.6	9491.6	0		-5.19426		1157
Q96F63	Coiled-coil domain-containing protein 97	CCDC97	sp|Q96F63|CCD97_HUMAN Coiled-coil domain-containing protein 97 OS=Homo sapiens GN=CCDC97 PE=1 SV=1	1	1	3.2	38.946	343	0.0089347	5.9456	149530	149530	0		-1.21662		1160
Q96G61;Q8NFP7	Diphosphoinositol polyphosphate phosphohydrolase 3-beta;Diphosphoinositol polyphosphate phosphohydrolase 3-alpha	NUDT11;NUDT10	sp|Q96G61|NUD11_HUMAN Diphosphoinositol polyphosphate phosphohydrolase 3-beta OS=Homo sapiens GN=NUDT11 PE=1 SV=1;sp|Q8NFP7|NUD10_HUMAN Diphosphoinositol polyphosphate phosphohydrolase 3-alpha OS=Homo sapiens GN=NUDT10 PE=1 SV=1	2	2	15.2	18.559	164	0.00089047	11.364	117900	117900	0		-1.55949		1161
Q96GA3;A0A075B6Q4	Protein LTV1 homolog	LTV1	sp|Q96GA3|LTV1_HUMAN Protein LTV1 homolog OS=Homo sapiens GN=LTV1 PE=1 SV=1;tr|A0A075B6Q4|A0A075B6Q4_HUMAN Uncharacterized protein OS=Homo sapiens PE=4 SV=2	2	3	7.4	54.854	475	0	18.558	385980	385980	0		0.151472		1162
Q96JG6	Coiled-coil domain-containing protein 132	CCDC132	sp|Q96JG6|VPS50_HUMAN Syndetin OS=Homo sapiens GN=VPS50 PE=1 SV=3	1	3	3.5	111.17	964	0	16.592	80989	80989	0		-2.10126		1168
Q96K37	Solute carrier family 35 member E1	SLC35E1	sp|Q96K37|S35E1_HUMAN Solute carrier family 35 member E1 OS=Homo sapiens GN=SLC35E1 PE=1 SV=2	1	2	8.8	44.772	410	0	59.265	372420	372420	0		0.0998764		1169
Q96LZ3	Calcineurin subunit B type 2	PPP3R2	sp|Q96LZ3|CANB2_HUMAN Calcineurin subunit B type 2 OS=Homo sapiens GN=PPP3R2 PE=1 SV=3	1	1	7.1	19.533	170	0.0076762	6.0129	6634300	6634300	0		4.25482		1170
Q96M94	Kelch-like protein 15	KLHL15	sp|Q96M94|KLH15_HUMAN Kelch-like protein 15 OS=Homo sapiens GN=KLHL15 PE=1 SV=2	1	3	5.8	69.774	604	0	17.273	72540	72540	0		-2.26021		1171
Q96RL7	Vacuolar protein sorting-associated protein 13A	VPS13A	sp|Q96RL7|VP13A_HUMAN Vacuolar protein sorting-associated protein 13A OS=Homo sapiens GN=VPS13A PE=1 SV=2	1	2	0.9	360.27	3174	0.00090827	11.538	11089	11089	0		-4.96985		1178
Q96RS6	NudC domain-containing protein 1	NUDCD1	sp|Q96RS6|NUDC1_HUMAN NudC domain-containing protein 1 OS=Homo sapiens GN=NUDCD1 PE=1 SV=2	1	2	3.8	66.755	583	0.000999	12.911	116420	116420	0		-1.57771		1179
Q96T88	E3 ubiquitin-protein ligase UHRF1	UHRF1	sp|Q96T88|UHRF1_HUMAN E3 ubiquitin-protein ligase UHRF1 OS=Homo sapiens GN=UHRF1 PE=1 SV=1	1	1	1.5	89.813	793	0.0015936	7.5775	0	0	0				1184
Q96TA2	ATP-dependent zinc metalloprotease YME1L1	YME1L1	sp|Q96TA2|YMEL1_HUMAN ATP-dependent zinc metalloprotease YME1L1 OS=Homo sapiens GN=YME1L1 PE=1 SV=2	1	14	23.2	86.454	773	0	177.13	1709200	1709200	0		2.29819		1185
Q96TC7	Regulator of microtubule dynamics protein 3	RMDN3	sp|Q96TC7|RMD3_HUMAN Regulator of microtubule dynamics protein 3 OS=Homo sapiens GN=RMDN3 PE=1 SV=2	1	2	4.5	52.118	470	0.00090498	11.52	54603	54603	0		-2.67		1186
Q99567	Nuclear pore complex protein Nup88	NUP88	sp|Q99567|NUP88_HUMAN Nuclear pore complex protein Nup88 OS=Homo sapiens GN=NUP88 PE=1 SV=2	1	5	8.8	83.541	741	0	29.665	405770	405770	0		0.223608		1189
Q99653	Calcineurin B homologous protein 1	CHP1	sp|Q99653|CHP1_HUMAN Calcineurin B homologous protein 1 OS=Homo sapiens GN=CHP1 PE=1 SV=3	1	1	6.2	22.456	195	0.0010288	13.929	817910	817910	0		1.23489		1195
Q99700	Ataxin-2	ATXN2	sp|Q99700|ATX2_HUMAN Ataxin-2 OS=Homo sapiens GN=ATXN2 PE=1 SV=2	1	1	1.1	140.28	1313	0.0022901	6.7381	0	0	0				1198
Q99733	Nucleosome assembly protein 1-like 4	NAP1L4	sp|Q99733|NP1L4_HUMAN Nucleosome assembly protein 1-like 4 OS=Homo sapiens GN=NAP1L4 PE=1 SV=1	1	7	22.9	42.823	375	0	121.55	1815900	1815900	0		2.38556		1201
Q99755;A2A3N6;O14986;O60331	Phosphatidylinositol 4-phosphate 5-kinase type-1 alpha	PIP5K1A	sp|Q99755|PI51A_HUMAN Phosphatidylinositol 4-phosphate 5-kinase type-1 alpha OS=Homo sapiens GN=PIP5K1A PE=1 SV=1	4	7	18.3	62.633	562	0	52.039	816730	816730	0		1.23281		1203
Q99942	E3 ubiquitin-protein ligase RNF5	RNF5	sp|Q99942|RNF5_HUMAN E3 ubiquitin-protein ligase RNF5 OS=Homo sapiens GN=RNF5 PE=1 SV=1	1	2	16.7	19.881	180	0	28.63	807210	807210	0		1.21589		1207
Q9BPZ7	Target of rapamycin complex 2 subunit MAPKAP1	MAPKAP1	sp|Q9BPZ7|SIN1_HUMAN Target of rapamycin complex 2 subunit MAPKAP1 OS=Homo sapiens GN=MAPKAP1 PE=1 SV=2	1	2	4.8	59.122	522	0	21.646	346440	346440	0		-0.00444794		1210
Q9BQE3	Tubulin alpha-1C chain	TUBA1C	sp|Q9BQE3|TBA1C_HUMAN Tubulin alpha-1C chain OS=Homo sapiens GN=TUBA1C PE=1 SV=1	1	28	69	49.895	449	0	149.38	2311300	2311300	0		2.73358		1213
Q9BQG0	Myb-binding protein 1A	MYBBP1A	sp|Q9BQG0|MBB1A_HUMAN Myb-binding protein 1A OS=Homo sapiens GN=MYBBP1A PE=1 SV=2	1	2	1.7	148.85	1328	0.0016835	10.832	16633	16633	0		-4.38493		1215
Q9BQT8	Mitochondrial 2-oxodicarboxylate carrier	SLC25A21	sp|Q9BQT8|ODC_HUMAN Mitochondrial 2-oxodicarboxylate carrier OS=Homo sapiens GN=SLC25A21 PE=1 SV=1	1	2	8.7	33.303	299	0.001003	12.982	301450	301450	0		-0.205135		1216
Q9BSB4	Autophagy-related protein 101	ATG101	sp|Q9BSB4|ATGA1_HUMAN Autophagy-related protein 101 OS=Homo sapiens GN=ATG101 PE=1 SV=1	1	1	5.5	25.002	218	0.0015886	7.5002	102970	102970	0		-1.75483		1221
Q9BT22	Chitobiosyldiphosphodolichol beta-mannosyltransferase	ALG1	sp|Q9BT22|ALG1_HUMAN Chitobiosyldiphosphodolichol beta-mannosyltransferase OS=Homo sapiens GN=ALG1 PE=1 SV=2	1	3	7.3	52.518	464	0	23.505	610660	610660	0		0.813316		1225
Q9BT25	HAUS augmin-like complex subunit 8	HAUS8	sp|Q9BT25|HAUS8_HUMAN HAUS augmin-like complex subunit 8 OS=Homo sapiens GN=HAUS8 PE=1 SV=3	1	2	4.9	44.857	410	0.001007	13.154	285320	285320	0		-0.284473		1226
Q9BTW9	Tubulin-specific chaperone D	TBCD	sp|Q9BTW9|TBCD_HUMAN Tubulin-specific chaperone D OS=Homo sapiens GN=TBCD PE=1 SV=2	1	1	1	132.6	1192	0.001626	8.6298	10129	10129	0		-5.10049		1228
Q9BTY7	Protein HGH1 homolog	HGH1	sp|Q9BTY7|HGH1_HUMAN Protein HGH1 homolog OS=Homo sapiens GN=HGH1 PE=1 SV=1	1	2	6.4	42.129	390	0.0016992	10.961	72577	72577	0		-2.25947		1229
Q9BU02	Thiamine-triphosphatase	THTPA	sp|Q9BU02|THTPA_HUMAN Thiamine-triphosphatase OS=Homo sapiens GN=THTPA PE=1 SV=3	1	2	10	25.566	230	0.00098814	12.76	118580	118580	0		-1.55119		1230
Q9BUF5	Tubulin beta-6 chain	TUBB6	sp|Q9BUF5|TBB6_HUMAN Tubulin beta-6 chain OS=Homo sapiens GN=TUBB6 PE=1 SV=1	1	19	53.4	49.857	446	0	299.63	6237300	6237300	0		4.1658		1231
Q9BUT1	3-hydroxybutyrate dehydrogenase type 2	BDH2	sp|Q9BUT1|BDH2_HUMAN 3-hydroxybutyrate dehydrogenase type 2 OS=Homo sapiens GN=BDH2 PE=1 SV=2	1	1	4.9	26.724	245	0.0022108	6.3894	59586	59586	0		-2.54401		1234
Q9BVA1	Tubulin beta-2B chain	TUBB2B	sp|Q9BVA1|TBB2B_HUMAN Tubulin beta-2B chain OS=Homo sapiens GN=TUBB2B PE=1 SV=1	1	23	62.5	49.953	445	0	191.57	36589000	36589000	0		6.71821		1236
Q9BVV7	Mitochondrial import inner membrane translocase subunit Tim21	TIMM21	sp|Q9BVV7|TIM21_HUMAN Mitochondrial import inner membrane translocase subunit Tim21 OS=Homo sapiens GN=TIMM21 PE=1 SV=1	1	2	9.7	28.202	248	0.00089767	11.423	274030	274030	0		-0.34272		1238
Q9BW92	Threonine--tRNA ligase, mitochondrial	TARS2	sp|Q9BW92|SYTM_HUMAN Threonine--tRNA ligase, mitochondrial OS=Homo sapiens GN=TARS2 PE=1 SV=1	1	6	8.9	81.035	718	0	36.407	346100	346100	0		-0.0058651		1239
Q9BXW7	Cat eye syndrome critical region protein 5	CECR5	sp|Q9BXW7|CECR5_HUMAN Cat eye syndrome critical region protein 5 OS=Homo sapiens GN=CECR5 PE=1 SV=1	1	2	6.4	46.321	423	0.00097752	12.421	153400	153400	0		-1.17976		1242
Q9BY84	Dual specificity protein phosphatase 16	DUSP16	sp|Q9BY84|DUS16_HUMAN Dual specificity protein phosphatase 16 OS=Homo sapiens GN=DUSP16 PE=1 SV=1	1	2	3.5	73.101	665	0.00090744	11.537	84575	84575	0		-2.03875		1244
Q9BYD1	39S ribosomal protein L13, mitochondrial	MRPL13	sp|Q9BYD1|RM13_HUMAN 39S ribosomal protein L13, mitochondrial OS=Homo sapiens GN=MRPL13 PE=1 SV=1	1	2	14	20.692	178	0.00093371	11.813	78016	78016	0		-2.15521		1246
Q9BZK7;O60907	F-box-like/WD repeat-containing protein TBL1XR1	TBL1XR1	sp|Q9BZK7|TBL1R_HUMAN F-box-like/WD repeat-containing protein TBL1XR1 OS=Homo sapiens GN=TBL1XR1 PE=1 SV=1	2	3	10.5	55.594	514	0.001056	16.484	50703	50703	0		-2.77691		1250
Q9BZX2;Q9HA47	Uridine-cytidine kinase 2	UCK2	sp|Q9BZX2|UCK2_HUMAN Uridine-cytidine kinase 2 OS=Homo sapiens GN=UCK2 PE=1 SV=1	2	5	21.8	29.299	261	0	31.901	1109600	1109600	0		1.67491		1251
Q9C035	Tripartite motif-containing protein 5	TRIM5	sp|Q9C035|TRIM5_HUMAN Tripartite motif-containing protein 5 OS=Homo sapiens GN=TRIM5 PE=1 SV=1	1	3	6.1	56.338	493	0	18.083	243320	243320	0		-0.514198		1252
Q9C0B7	Transport and Golgi organization protein 6 homolog	TANGO6	sp|Q9C0B7|TNG6_HUMAN Transport and Golgi organization protein 6 homolog OS=Homo sapiens GN=TANGO6 PE=1 SV=2	1	4	4.8	120.75	1094	0	23.456	86305	86305	0		-2.00954		1254
Q9C0D2	Centrosomal protein of 295 kDa	CEP295	sp|Q9C0D2|CE295_HUMAN Centrosomal protein of 295 kDa OS=Homo sapiens GN=CEP295 PE=2 SV=4	1	1	0.5	295.17	2601	0.0022239	6.4159	6256	6256	0		-5.79567		1257
Q9GZR1	Sentrin-specific protease 6	SENP6	sp|Q9GZR1|SENP6_HUMAN Sentrin-specific protease 6 OS=Homo sapiens GN=SENP6 PE=1 SV=2	1	2	2.2	126.14	1112	0.00085985	11.056	14237	14237	0		-4.60934		1260
Q9GZR7	ATP-dependent RNA helicase DDX24	DDX24	sp|Q9GZR7|DDX24_HUMAN ATP-dependent RNA helicase DDX24 OS=Homo sapiens GN=DDX24 PE=1 SV=1	1	1	1.4	96.331	859	0.0036417	6.3051	12800	12800	0		-4.76284		1261
Q9GZZ8	Extracellular glycoprotein lacritin	LACRT	sp|Q9GZZ8|LACRT_HUMAN Extracellular glycoprotein lacritin OS=Homo sapiens GN=LACRT PE=1 SV=1	1	1	8	14.246	138	0.0022971	6.8536	508820	508820	0		0.550102		1262
Q9H078	Caseinolytic peptidase B protein homolog	CLPB	sp|Q9H078|CLPB_HUMAN Caseinolytic peptidase B protein homolog OS=Homo sapiens GN=CLPB PE=1 SV=1	1	5	10.2	78.728	707	0	38.964	264330	264330	0		-0.394714		1263
Q9H223	EH domain-containing protein 4	EHD4	sp|Q9H223|EHD4_HUMAN EH domain-containing protein 4 OS=Homo sapiens GN=EHD4 PE=1 SV=1	1	2	5.2	61.174	541	0.00088496	11.293	39898	39898	0		-3.12267		1267
Q9H2V7	Protein spinster homolog 1	SPNS1	sp|Q9H2V7|SPNS1_HUMAN Protein spinster homolog 1 OS=Homo sapiens GN=SPNS1 PE=1 SV=1	1	1	2.7	56.629	528	0.0016313	8.8013	317410	317410	0		-0.130707		1272
Q9H3K6	BolA-like protein 2	BOLA2	sp|Q9H3K6|BOLA2_HUMAN BolA-like protein 2 OS=Homo sapiens GN=BOLA2 PE=1 SV=1	1	1	10.5	10.116	86	0.002214	6.3953	239510	239510	0		-0.536968		1274
Q9H5Q4	Dimethyladenosine transferase 2, mitochondrial	TFB2M	sp|Q9H5Q4|TFB2M_HUMAN Dimethyladenosine transferase 2, mitochondrial OS=Homo sapiens GN=TFB2M PE=1 SV=1	1	3	7.6	45.348	396	0	41.751	201870	201870	0		-0.783627		1281
Q9H6R4	Nucleolar protein 6	NOL6	sp|Q9H6R4|NOL6_HUMAN Nucleolar protein 6 OS=Homo sapiens GN=NOL6 PE=1 SV=2	1	1	1.1	127.59	1146	0.0023006	6.8544	21422	21422	0		-4.01989		1282
Q9H7N4	Splicing factor, arginine/serine-rich 19	SCAF1	sp|Q9H7N4|SFR19_HUMAN Splicing factor, arginine/serine-rich 19 OS=Homo sapiens GN=SCAF1 PE=1 SV=3	1	2	2.1	139.27	1312	0.00098135	12.497	54251	54251	0		-2.67933		1285
Q9H8H0	Nucleolar protein 11	NOL11	sp|Q9H8H0|NOL11_HUMAN Nucleolar protein 11 OS=Homo sapiens GN=NOL11 PE=1 SV=1	1	3	5	81.123	719	0	18.616	96770	96770	0		-1.84442		1286
Q9H8Y5	Ankyrin repeat and zinc finger domain-containing protein 1	ANKZF1	sp|Q9H8Y5|ANKZ1_HUMAN Ankyrin repeat and zinc finger domain-containing protein 1 OS=Homo sapiens GN=ANKZF1 PE=1 SV=1	1	3	5.1	80.926	726	0	16.731	143990	143990	0		-1.27109		1287
Q9H992	E3 ubiquitin-protein ligase MARCH7	2007-03-01	sp|Q9H992|MARH7_HUMAN E3 ubiquitin-protein ligase MARCH7 OS=Homo sapiens GN=MARCH7 PE=1 SV=1	1	9	16.5	78.05	704	0	61.971	983310	983310	0		1.50059		1289
Q9H9B4	Sideroflexin-1	SFXN1	sp|Q9H9B4|SFXN1_HUMAN Sideroflexin-1 OS=Homo sapiens GN=SFXN1 PE=1 SV=4	1	2	8.4	35.619	322	0.0010204	13.565	243380	243380	0		-0.513844		1290
Q9H9H4	Vacuolar protein sorting-associated protein 37B	VPS37B	sp|Q9H9H4|VP37B_HUMAN Vacuolar protein sorting-associated protein 37B OS=Homo sapiens GN=VPS37B PE=1 SV=1	1	1	3.9	31.307	285	0.0016116	7.9047	0	0	0				1291
Q9HC07	Transmembrane protein 165	TMEM165	sp|Q9HC07|TM165_HUMAN Transmembrane protein 165 OS=Homo sapiens GN=TMEM165 PE=1 SV=1	1	3	19.4	34.905	324	0	83.551	914300	914300	0		1.39561		1296
Q9HCU5	Prolactin regulatory element-binding protein	PREB	sp|Q9HCU5|PREB_HUMAN Prolactin regulatory element-binding protein OS=Homo sapiens GN=PREB PE=1 SV=2	1	2	6.7	45.468	417	0.0016863	10.856	128610	128610	0		-1.43405		1302
Q9HCU9	Breast cancer metastasis-suppressor 1	BRMS1	sp|Q9HCU9|BRMS1_HUMAN Breast cancer metastasis-suppressor 1 OS=Homo sapiens GN=BRMS1 PE=1 SV=1	1	1	5.3	28.46	246	0.00095785	12.071	119580	119580	0		-1.53908		1303
Q9HD26;A0A0J9YVX5	Golgi-associated PDZ and coiled-coil motif-containing protein	GOPC	sp|Q9HD26|GOPC_HUMAN Golgi-associated PDZ and coiled-coil motif-containing protein OS=Homo sapiens GN=GOPC PE=1 SV=1	2	7	19.3	50.519	462	0	52.62	945880	945880	0		1.4446		1304
Q9NPF5	DNA methyltransferase 1-associated protein 1	DMAP1	sp|Q9NPF5|DMAP1_HUMAN DNA methyltransferase 1-associated protein 1 OS=Homo sapiens GN=DMAP1 PE=1 SV=1	1	3	9	52.992	467	0	20.504	143080	143080	0		-1.28023		1308
Q9NPH2	Inositol-3-phosphate synthase 1	ISYNA1	sp|Q9NPH2|INO1_HUMAN Inositol-3-phosphate synthase 1 OS=Homo sapiens GN=ISYNA1 PE=1 SV=1	1	1	2	61.067	558	0.0036179	6.2499	42118	42118	0		-3.04455		1309
Q9NVN3;Q9NPQ8	Synembryn-B;Synembryn-A	RIC8B;RIC8A	sp|Q9NVN3|RIC8B_HUMAN Synembryn-B OS=Homo sapiens GN=RIC8B PE=1 SV=2;sp|Q9NPQ8|RIC8A_HUMAN Synembryn-A OS=Homo sapiens GN=RIC8A PE=1 SV=3	2	1	2.7	58.824	520	0.0015748	7.3434	32654	32654	0		-3.41172		1311
Q9NQT4	Exosome complex component RRP46	EXOSC5	sp|Q9NQT4|EXOS5_HUMAN Exosome complex component RRP46 OS=Homo sapiens GN=EXOSC5 PE=1 SV=1	1	1	5.1	25.249	235	0.0010173	13.486	381960	381960	0		0.136368		1312
Q9NQT5	Exosome complex component RRP40	EXOSC3	sp|Q9NQT5|EXOS3_HUMAN Exosome complex component RRP40 OS=Homo sapiens GN=EXOSC3 PE=1 SV=3	1	1	5.5	29.572	275	0.0077247	6.0349	86905	86905	0		-1.99954		1313
Q9NQT8	Kinesin-like protein KIF13B	KIF13B	sp|Q9NQT8|KI13B_HUMAN Kinesin-like protein KIF13B OS=Homo sapiens GN=KIF13B PE=1 SV=2	1	1	0.6	202.79	1826	0.0022745	6.6459	36130	36130	0		-3.26579		1314
Q9NR12	PDZ and LIM domain protein 7	PDLIM7	sp|Q9NR12|PDLI7_HUMAN PDZ and LIM domain protein 7 OS=Homo sapiens GN=PDLIM7 PE=1 SV=1	1	1	2.4	49.844	457	0.0022288	6.4342	29314	29314	0		-3.56739		1316
Q9NR33	DNA polymerase epsilon subunit 4	POLE4	sp|Q9NR33|DPOE4_HUMAN DNA polymerase epsilon subunit 4 OS=Homo sapiens GN=POLE4 PE=1 SV=2	1	2	19.7	12.209	117	0	17.681	688100	688100	0		0.985565		1319
Q9NR50	Translation initiation factor eIF-2B subunit gamma	EIF2B3	sp|Q9NR50|EI2BG_HUMAN Translation initiation factor eIF-2B subunit gamma OS=Homo sapiens GN=EIF2B3 PE=1 SV=1	1	3	7.5	50.24	452	0	17.464	180460	180460	0		-0.945375		1320
Q9NRP0	Oligosaccharyltransferase complex subunit OSTC	OSTC	sp|Q9NRP0|OSTC_HUMAN Oligosaccharyltransferase complex subunit OSTC OS=Homo sapiens GN=OSTC PE=1 SV=1	1	1	8.1	16.829	149	0.00087951	11.221	478130	478130	0		0.460348		1322
Q9NS69	Mitochondrial import receptor subunit TOM22 homolog	TOMM22	sp|Q9NS69|TOM22_HUMAN Mitochondrial import receptor subunit TOM22 homolog OS=Homo sapiens GN=TOMM22 PE=1 SV=3	1	2	23.2	15.521	142	0	23.656	1352100	1352100	0		1.96008		1323
Q9NSI2	Protein FAM207A	FAM207A	sp|Q9NSI2|F207A_HUMAN Protein FAM207A OS=Homo sapiens GN=FAM207A PE=1 SV=2	1	3	16.5	25.456	230	0	18.858	510950	510950	0		0.556128		1324
Q9NSV4	Protein diaphanous homolog 3	DIAPH3	sp|Q9NSV4|DIAP3_HUMAN Protein diaphanous homolog 3 OS=Homo sapiens GN=DIAPH3 PE=1 SV=4	1	6	7.1	136.92	1193	0	34.229	150040	150040	0		-1.21171		1325
Q9NUP9;O14910	Protein lin-7 homolog C;Protein lin-7 homolog A	LIN7C;LIN7A	sp|Q9NUP9|LIN7C_HUMAN Protein lin-7 homolog C OS=Homo sapiens GN=LIN7C PE=1 SV=1;sp|O14910|LIN7A_HUMAN Protein lin-7 homolog A OS=Homo sapiens GN=LIN7A PE=1 SV=2	2	2	14.7	21.834	197	0.00088261	11.253	766800	766800	0		1.1418		1329
Q9NUQ2	1-acyl-sn-glycerol-3-phosphate acyltransferase epsilon	AGPAT5	sp|Q9NUQ2|PLCE_HUMAN 1-acyl-sn-glycerol-3-phosphate acyltransferase epsilon OS=Homo sapiens GN=AGPAT5 PE=1 SV=3	1	2	6.9	42.072	364	0	18.171	120790	120790	0		-1.52455		1330
Q9NVH1	DnaJ homolog subfamily C member 11	DNAJC11	sp|Q9NVH1|DJC11_HUMAN DnaJ homolog subfamily C member 11 OS=Homo sapiens GN=DNAJC11 PE=1 SV=2	1	9	19.7	63.277	559	0	78.88	1631000	1631000	0		2.23063		1332
Q9NVV4	Poly(A) RNA polymerase, mitochondrial	MTPAP	sp|Q9NVV4|PAPD1_HUMAN Poly(A) RNA polymerase, mitochondrial OS=Homo sapiens GN=MTPAP PE=1 SV=1	1	1	2.1	66.171	582	0.0016367	9.1055	84587	84587	0		-2.03855		1336
Q9NVW2	E3 ubiquitin-protein ligase RLIM	RLIM	sp|Q9NVW2|RNF12_HUMAN E3 ubiquitin-protein ligase RLIM OS=Homo sapiens GN=RLIM PE=1 SV=3	1	1	2.2	68.548	624	0	18.679	88828	88828	0		-1.96797		1337
Q9NWS0	PIH1 domain-containing protein 1	PIH1D1	sp|Q9NWS0|PIHD1_HUMAN PIH1 domain-containing protein 1 OS=Homo sapiens GN=PIH1D1 PE=1 SV=1	1	3	13.1	32.363	290	0	29.358	362680	362680	0		0.0616436		1339
Q9NWT6	Hypoxia-inducible factor 1-alpha inhibitor	HIF1AN	sp|Q9NWT6|HIF1N_HUMAN Hypoxia-inducible factor 1-alpha inhibitor OS=Homo sapiens GN=HIF1AN PE=1 SV=2	1	1	4.6	40.285	349	0.0016407	9.1166	33183	33183	0		-3.38854		1340
Q9NWW5;H3BRN7	Ceroid-lipofuscinosis neuronal protein 6	CLN6	sp|Q9NWW5|CLN6_HUMAN Ceroid-lipofuscinosis neuronal protein 6 OS=Homo sapiens GN=CLN6 PE=1 SV=1;tr|H3BRN7|H3BRN7_HUMAN Uncharacterized protein OS=Homo sapiens PE=4 SV=1	2	2	10.9	35.919	311	0.0010163	13.484	993700	993700	0		1.51576		1341
Q9NXV2	BTB/POZ domain-containing protein KCTD5	KCTD5	sp|Q9NXV2|KCTD5_HUMAN BTB/POZ domain-containing protein KCTD5 OS=Homo sapiens GN=KCTD5 PE=1 SV=1	1	1	5.1	26.092	234	0.0076655	6.0043	49972	49972	0		-2.79786		1346
Q9NYJ8	TGF-beta-activated kinase 1 and MAP3K7-binding protein 2	TAB2	sp|Q9NYJ8|TAB2_HUMAN TGF-beta-activated kinase 1 and MAP3K7-binding protein 2 OS=Homo sapiens GN=TAB2 PE=1 SV=1	1	1	2.3	76.493	693	0.0036738	6.373	64135	0	64135			0.115198	1350
Q9NZB2	Constitutive coactivator of PPAR-gamma-like protein 1	FAM120A	sp|Q9NZB2|F120A_HUMAN Constitutive coactivator of PPAR-gamma-like protein 1 OS=Homo sapiens GN=FAM120A PE=1 SV=2	1	1	1.2	121.89	1118	0.0016207	8.3619	17357	17357	0		-4.32346		1352
Q9P000	COMM domain-containing protein 9	COMMD9	sp|Q9P000|COMD9_HUMAN COMM domain-containing protein 9 OS=Homo sapiens GN=COMMD9 PE=1 SV=2	1	1	8.1	21.819	198	0	30.266	271650	271650	0		-0.355305		1356
Q9P003	Protein cornichon homolog 4	CNIH4	sp|Q9P003|CNIH4_HUMAN Protein cornichon homolog 4 OS=Homo sapiens GN=CNIH4 PE=1 SV=1	1	1	14.4	16.093	139	0.0016515	9.628	2259300	2259300	0		2.70075		1357
Q9P287	BRCA2 and CDKN1A-interacting protein	BCCIP	sp|Q9P287|BCCIP_HUMAN BRCA2 and CDKN1A-interacting protein OS=Homo sapiens GN=BCCIP PE=1 SV=1	1	5	25.5	35.979	314	0	163.79	4770600	4770600	0		3.77905		1361
Q9P2F8	Signal-induced proliferation-associated 1-like protein 2	SIPA1L2	sp|Q9P2F8|SI1L2_HUMAN Signal-induced proliferation-associated 1-like protein 2 OS=Homo sapiens GN=SIPA1L2 PE=1 SV=2	1	1	0.8	190.44	1722	0.0083333	5.9941	7255.7	7255.7	0		-5.5818		1364
Q9P2I0	Cleavage and polyadenylation specificity factor subunit 2	CPSF2	sp|Q9P2I0|CPSF2_HUMAN Cleavage and polyadenylation specificity factor subunit 2 OS=Homo sapiens GN=CPSF2 PE=1 SV=2	1	4	6.9	88.486	782	0	26.344	152120	152120	0		-1.19184		1365
Q9P2L0	WD repeat-containing protein 35	WDR35	sp|Q9P2L0|WDR35_HUMAN WD repeat-containing protein 35 OS=Homo sapiens GN=WDR35 PE=1 SV=3	1	2	2.8	133.55	1181	0.00093809	11.833	60977	60977	0		-2.51072		1367
Q9P2W9	Syntaxin-18	STX18	sp|Q9P2W9|STX18_HUMAN Syntaxin-18 OS=Homo sapiens GN=STX18 PE=1 SV=1	1	2	6.3	38.673	335	0.00096805	12.224	194770	194770	0		-0.835283		1369
Q9UDV7	Zinc finger protein 282	ZNF282	sp|Q9UDV7|ZN282_HUMAN Zinc finger protein 282 OS=Homo sapiens GN=ZNF282 PE=2 SV=3	1	1	3.4	74.295	671	0.0089286	5.9442	41842	41842	0		-3.05403		1379
Q9UFF9	CCR4-NOT transcription complex subunit 8	CNOT8	sp|Q9UFF9|CNOT8_HUMAN CCR4-NOT transcription complex subunit 8 OS=Homo sapiens GN=CNOT8 PE=1 SV=1	1	2	8.6	33.54	292	0.0010363	14.489	186530	186530	0		-0.897646		1381
Q9UHR4	Brain-specific angiogenesis inhibitor 1-associated protein 2-like protein 1	BAIAP2L1	sp|Q9UHR4|BI2L1_HUMAN Brain-specific angiogenesis inhibitor 1-associated protein 2-like protein 1 OS=Homo sapiens GN=BAIAP2L1 PE=1 SV=2	1	1	2.2	56.882	511	0.0022157	6.4075	21024	21024	0		-4.04694		1389
Q9UHV9	Prefoldin subunit 2	PFDN2	sp|Q9UHV9|PFD2_HUMAN Prefoldin subunit 2 OS=Homo sapiens GN=PFDN2 PE=1 SV=1	1	3	26.6	16.648	154	0	75.958	679520	679520	0		0.967463		1390
Q9UHW5	GPN-loop GTPase 3	GPN3	sp|Q9UHW5|GPN3_HUMAN GPN-loop GTPase 3 OS=Homo sapiens GN=GPN3 PE=1 SV=2	1	2	9.9	32.761	284	0.0010406	14.883	364780	364780	0		0.069973		1391
Q9UI12	V-type proton ATPase subunit H	ATP6V1H	sp|Q9UI12|VATH_HUMAN V-type proton ATPase subunit H OS=Homo sapiens GN=ATP6V1H PE=1 SV=1	1	2	4.6	55.882	483	0.00095329	12.009	139830	139830	0		-1.31338		1393
Q9UII4	E3 ISG15--protein ligase HERC5	HERC5	sp|Q9UII4|HERC5_HUMAN E3 ISG15--protein ligase HERC5 OS=Homo sapiens GN=HERC5 PE=1 SV=2	1	3	3.1	116.85	1024	0	16.601	91385	91385	0		-1.92702		1395
Q9UJ14	Gamma-glutamyltransferase 7;Gamma-glutamyltransferase 7 heavy chain;Gamma-glutamyltransferase 7 light chain	GGT7	sp|Q9UJ14|GGT7_HUMAN Gamma-glutamyltransferase 7 OS=Homo sapiens GN=GGT7 PE=1 SV=2	1	1	2	70.466	662	0.0023059	6.9187	70384	70384	0		-2.30373		1396
Q9UJC3	Protein Hook homolog 1	HOOK1	sp|Q9UJC3|HOOK1_HUMAN Protein Hook homolog 1 OS=Homo sapiens GN=HOOK1 PE=1 SV=2	1	1	1.6	84.647	728	0.0015576	7.0957	33689	33689	0		-3.3667		1397
Q9UJP4	Kelch-like protein 21	KLHL21	sp|Q9UJP4|KLH21_HUMAN Kelch-like protein 21 OS=Homo sapiens GN=KLHL21 PE=1 SV=4	1	1	2.2	66.617	597	0.0036284	6.2653	72037	72037	0		-2.27024		1398
Q9UJW0	Dynactin subunit 4	DCTN4	sp|Q9UJW0|DCTN4_HUMAN Dynactin subunit 4 OS=Homo sapiens GN=DCTN4 PE=1 SV=1	1	4	11.1	52.337	460	0	24.951	254080	254080	0		-0.451771		1401
Q9UJX2	Cell division cycle protein 23 homolog	CDC23	sp|Q9UJX2|CDC23_HUMAN Cell division cycle protein 23 homolog OS=Homo sapiens GN=CDC23 PE=1 SV=3	1	1	1.8	68.833	597	0.0023112	6.9777	27257	27257	0		-3.67236		1402
Q9UL15	BAG family molecular chaperone regulator 5	BAG5	sp|Q9UL15|BAG5_HUMAN BAG family molecular chaperone regulator 5 OS=Homo sapiens GN=BAG5 PE=1 SV=1	1	7	23.7	51.199	447	0	54.766	1330400	1330400	0		1.93674		1409
Q9UM00	Transmembrane and coiled-coil domain-containing protein 1	TMCO1	sp|Q9UM00|TMCO1_HUMAN Transmembrane and coiled-coil domain-containing protein 1 OS=Homo sapiens GN=TMCO1 PE=1 SV=1	1	1	8	21.175	188	0.0015949	7.5894	939070	939070	0		1.43418		1413
Q9UM13	Anaphase-promoting complex subunit 10	ANAPC10	sp|Q9UM13|APC10_HUMAN Anaphase-promoting complex subunit 10 OS=Homo sapiens GN=ANAPC10 PE=1 SV=1	1	1	6.5	21.252	185	0.0022405	6.478	69477	69477	0		-2.32245		1414
Q9UM54	Unconventional myosin-VI	MYO6	sp|Q9UM54|MYO6_HUMAN Unconventional myosin-VI OS=Homo sapiens GN=MYO6 PE=1 SV=4	1	4	3.9	149.69	1294	0	22.529	87306	87306	0		-1.9929		1415
Q9UMZ2	Synergin gamma	SYNRG	sp|Q9UMZ2|SYNRG_HUMAN Synergin gamma OS=Homo sapiens GN=SYNRG PE=1 SV=2	1	2	2.4	140.65	1314	0.00090416	11.507	15253	15253	0		-4.50989		1417
Q9UN86	Ras GTPase-activating protein-binding protein 2	G3BP2	sp|Q9UN86|G3BP2_HUMAN Ras GTPase-activating protein-binding protein 2 OS=Homo sapiens GN=G3BP2 PE=1 SV=2	1	4	9.8	54.12	482	0	18.809	387740	387740	0		0.158035		1419
Q9UNE7	E3 ubiquitin-protein ligase CHIP	STUB1	sp|Q9UNE7|CHIP_HUMAN E3 ubiquitin-protein ligase CHIP OS=Homo sapiens GN=STUB1 PE=1 SV=2	1	6	23.1	34.856	303	0	105.54	1425000	1425000	0		2.03584		1420
Q9UNL2	Translocon-associated protein subunit gamma	SSR3	sp|Q9UNL2|SSRG_HUMAN Translocon-associated protein subunit gamma OS=Homo sapiens GN=SSR3 PE=1 SV=1	1	1	7.6	21.08	185	0.0010471	15.995	2163600	2163600	0		2.63831		1422
Q9UPN9	E3 ubiquitin-protein ligase TRIM33	TRIM33	sp|Q9UPN9|TRI33_HUMAN E3 ubiquitin-protein ligase TRIM33 OS=Homo sapiens GN=TRIM33 PE=1 SV=3	1	1	1.2	122.53	1127	0.001548	7.0391	15596	15596	0		-4.47781		1427
Q9UPU7	TBC1 domain family member 2B	TBC1D2B	sp|Q9UPU7|TBD2B_HUMAN TBC1 domain family member 2B OS=Homo sapiens GN=TBC1D2B PE=1 SV=2	1	1	1.1	109.88	963	0.0023202	7.0235	25180	25180	0		-3.7867		1428
Q9UPY3	Endoribonuclease Dicer	DICER1	sp|Q9UPY3|DICER_HUMAN Endoribonuclease Dicer OS=Homo sapiens GN=DICER1 PE=1 SV=3	1	1	0.6	218.68	1922	0.0015911	7.5128	8237.9	8237.9	0		-5.39863		1429
Q9Y230	RuvB-like 2	RUVBL2	sp|Q9Y230|RUVB2_HUMAN RuvB-like 2 OS=Homo sapiens GN=RUVBL2 PE=1 SV=3	1	13	32.4	51.156	463	0	110.87	1600400	1600400	0		2.20331		1434
Q9Y256	CAAX prenyl protease 2	RCE1	sp|Q9Y256|FACE2_HUMAN CAAX prenyl protease 2 OS=Homo sapiens GN=RCE1 PE=1 SV=1	1	1	4.3	35.832	329	0.00163	8.7725	395930	395930	0		0.188192		1435
Q9Y262	Eukaryotic translation initiation factor 3 subunit L	EIF3L	sp|Q9Y262|EIF3L_HUMAN Eukaryotic translation initiation factor 3 subunit L OS=Homo sapiens GN=EIF3L PE=1 SV=1	1	2	5	66.726	564	0.00092507	11.737	97284	97284	0		-1.83678		1436
Q9Y285	Phenylalanine--tRNA ligase alpha subunit	FARSA	sp|Q9Y285|SYFA_HUMAN Phenylalanine--tRNA ligase alpha subunit OS=Homo sapiens GN=FARSA PE=1 SV=3	1	10	32.1	57.563	508	0	135.46	3652300	3652300	0		3.39368		1440
Q9Y2F5	Little elongation complex subunit 1	ICE1	sp|Q9Y2F5|ICE1_HUMAN Little elongation complex subunit 1 OS=Homo sapiens GN=ICE1 PE=1 SV=5	1	2	1.3	247.89	2266	0.00085543	11.012	19430	19430	0		-4.1607		1443
Q9Y2T2;P53677	AP-3 complex subunit mu-1;AP-3 complex subunit mu-2	AP3M1;AP3M2	sp|Q9Y2T2|AP3M1_HUMAN AP-3 complex subunit mu-1 OS=Homo sapiens GN=AP3M1 PE=1 SV=1;sp|P53677|AP3M2_HUMAN AP-3 complex subunit mu-2 OS=Homo sapiens GN=AP3M2 PE=2 SV=1	2	3	10.3	46.939	418	0	19.627	344320	344320	0		-0.0133038		1447
Q9Y2X3	Nucleolar protein 58	NOP58	sp|Q9Y2X3|NOP58_HUMAN Nucleolar protein 58 OS=Homo sapiens GN=NOP58 PE=1 SV=1	1	6	14.4	59.578	529	0	39.111	598010	598010	0		0.783115		1449
Q9Y2Z0	Suppressor of G2 allele of SKP1 homolog	SUGT1	sp|Q9Y2Z0|SGT1_HUMAN Protein SGT1 homolog OS=Homo sapiens GN=SUGT1 PE=1 SV=3	1	2	7.1	41.024	365	0.000998	12.904	220360	220360	0		-0.657192		1451
Q9Y3D0	Mitotic spindle-associated MMXD complex subunit MIP18	FAM96B	sp|Q9Y3D0|MIP18_HUMAN Mitotic spindle-associated MMXD complex subunit MIP18 OS=Homo sapiens GN=FAM96B PE=1 SV=1	1	1	13.5	17.663	163	0.0015835	7.4678	289260	289260	0		-0.264687		1454
Q9Y3I0	tRNA-splicing ligase RtcB homolog	RTCB	sp|Q9Y3I0|RTCB_HUMAN tRNA-splicing ligase RtcB homolog OS=Homo sapiens GN=RTCB PE=1 SV=1	1	8	20.4	55.21	505	0	62.673	1143400	1143400	0		1.7182		1456
Q9Y448	Small kinetochore-associated protein	KNSTRN	sp|Q9Y448|SKAP_HUMAN Small kinetochore-associated protein OS=Homo sapiens GN=KNSTRN PE=1 SV=2	1	2	7.3	35.438	316	0.00098425	12.646	160970	160970	0		-1.11026		1458
Q9Y484	WD repeat domain phosphoinositide-interacting protein 4	WDR45	sp|Q9Y484|WIPI4_HUMAN WD repeat domain phosphoinositide-interacting protein 4 OS=Homo sapiens GN=WDR45 PE=2 SV=1	1	3	10	39.867	360	0	17.283	245110	245110	0		-0.503624		1459
Q9Y4A5	Transformation/transcription domain-associated protein	TRRAP	sp|Q9Y4A5|TRRAP_HUMAN Transformation/transcription domain-associated protein OS=Homo sapiens GN=TRRAP PE=1 SV=3	1	3	1	437.6	3859	0	19.763	13461	13461	0		-4.6902		1460
Q9Y4K3	TNF receptor-associated factor 6	TRAF6	sp|Q9Y4K3|TRAF6_HUMAN TNF receptor-associated factor 6 OS=Homo sapiens GN=TRAF6 PE=1 SV=1	1	2	4.4	59.573	522	0	16.919	102860	102860	0		-1.75637		1464
Q9Y4L1	Hypoxia up-regulated protein 1	HYOU1	sp|Q9Y4L1|HYOU1_HUMAN Hypoxia up-regulated protein 1 OS=Homo sapiens GN=HYOU1 PE=1 SV=1	1	2	1.5	111.33	999	0.0008569	11.038	38450	38450	0		-3.176		1465
Q9Y4L5	E3 ubiquitin-protein ligase RNF115	RNF115	sp|Q9Y4L5|RN115_HUMAN E3 ubiquitin-protein ligase RNF115 OS=Homo sapiens GN=RNF115 PE=1 SV=2	1	1	5.9	33.703	304	0	32.947	130340	130340	0		-1.41477		1466
Q9Y4P3	Transducin beta-like protein 2	TBL2	sp|Q9Y4P3|TBL2_HUMAN Transducin beta-like protein 2 OS=Homo sapiens GN=TBL2 PE=1 SV=1	1	2	5.8	49.797	447	0.00092764	11.772	37823	37823	0		-3.19972		1467
Q9Y512	Sorting and assembly machinery component 50 homolog	SAMM50	sp|Q9Y512|SAM50_HUMAN Sorting and assembly machinery component 50 homolog OS=Homo sapiens GN=SAMM50 PE=1 SV=3	1	4	9.6	51.976	469	0	25.639	223830	223830	0		-0.634651		1470
Q9Y5Q8	General transcription factor 3C polypeptide 5	GTF3C5	sp|Q9Y5Q8|TF3C5_HUMAN General transcription factor 3C polypeptide 5 OS=Homo sapiens GN=GTF3C5 PE=1 SV=2	1	10	26.2	59.57	519	0	64.138	856430	856430	0		1.30128		1476
Q9Y5S9	RNA-binding protein 8A	RBM8A	sp|Q9Y5S9|RBM8A_HUMAN RNA-binding protein 8A OS=Homo sapiens GN=RBM8A PE=1 SV=1	1	1	6.3	19.889	174	0.0016026	7.6921	148250	148250	0		-1.22902		1478
Q9Y5Y2	Cytosolic Fe-S cluster assembly factor NUBP2	NUBP2	sp|Q9Y5Y2|NUBP2_HUMAN Cytosolic Fe-S cluster assembly factor NUBP2 OS=Homo sapiens GN=NUBP2 PE=1 SV=1	1	2	8.5	28.825	271	0.0010246	13.722	197240	197240	0		-0.817102		1481
Q9Y605	MORF4 family-associated protein 1	MRFAP1	sp|Q9Y605|MOFA1_HUMAN MORF4 family-associated protein 1 OS=Homo sapiens GN=MRFAP1 PE=1 SV=1	1	1	18.9	14.649	127	0	25.138	1139700	1139700	0		1.71353		1482
Q9Y617	Phosphoserine aminotransferase	PSAT1	sp|Q9Y617|SERC_HUMAN Phosphoserine aminotransferase OS=Homo sapiens GN=PSAT1 PE=1 SV=2	1	2	6.2	40.422	370	0.00088652	11.339	118750	118750	0		-1.54913		1483
Q9Y679	Ancient ubiquitous protein 1	AUP1	sp|Q9Y679|AUP1_HUMAN Ancient ubiquitous protein 1 OS=Homo sapiens GN=AUP1 PE=1 SV=1	1	3	5.7	53.028	476	0	18.628	386750	386750	0		0.154346		1485
Q9Y6A4	Cilia- and flagella-associated protein 20	CFAP20	sp|Q9Y6A4|CFA20_HUMAN Cilia- and flagella-associated protein 20 OS=Homo sapiens GN=CFAP20 PE=1 SV=1	1	1	6.2	22.774	193	0.0089655	5.9656	0	0	0				1486
Q9Y6G9	Cytoplasmic dynein 1 light intermediate chain 1	DYNC1LI1	sp|Q9Y6G9|DC1L1_HUMAN Cytoplasmic dynein 1 light intermediate chain 1 OS=Homo sapiens GN=DYNC1LI1 PE=1 SV=3	1	8	23.3	56.578	523	0	51.078	620200	620200	0		0.83568		1488
